# Supplementary material for: Rapid stimulus-driven modulation of slow ocular position drifts
Source: eLife. 2020 Aug 6;9:e57595. doi: 10.7554/eLife.57595 (PMC7442486; doi:10.7554/eLife.57595)
Supplement: Figure 1—source data 1. [file elife-57595-fig1-data1.xlsx]

## Sheet: Panel_A
time	vEyePosControl_Mean	vEyePosControl_95ci_low	vEyePosControl_95ci_up	vEyePosLeft_Mean	vEyePosLeft_95ci_low	vEyePosLeft_95ci_up	vEyePosRight_Mean	vEyePosRight_95ci_low	vEyePosRight_95ci_up
-100	-0.055797	-0.248598	0.137004	-0.00404697	-0.139902	0.131808	-0.0556528	-0.190366	0.0790599
-99	-0.0661644	-0.256652	0.124323	0.0060075	-0.127842	0.139857	-0.0343228	-0.167517	0.0988717
-98	-0.0229052	-0.215081	0.169271	0.0100033	-0.123364	0.14337	-0.0215935	-0.153582	0.110395
-97	-0.0261867	-0.218285	0.165912	0.0191682	-0.114362	0.152698	-0.0295558	-0.158987	0.0998749
-96	-0.0561043	-0.240542	0.128333	0.0275732	-0.103726	0.158873	-0.0504448	-0.17992	0.0790308
-95	-0.0509906	-0.233189	0.131207	0.0104835	-0.119865	0.140832	-0.0315695	-0.15915	0.0960112
-94	-0.0467314	-0.231081	0.137619	-0.00954944	-0.137761	0.118662	-0.0307759	-0.156903	0.0953508
-93	-0.0582862	-0.242314	0.125742	0.00625097	-0.120571	0.133073	-0.0460975	-0.170688	0.0784934
-92	-0.0468887	-0.233027	0.139249	0.021484	-0.105039	0.148007	-0.0497289	-0.173904	0.0744464
-91	-0.0635781	-0.250888	0.123732	0.0153482	-0.109966	0.140662	-0.0326858	-0.15484	0.0894679
-90	-0.0357589	-0.219949	0.148432	-0.00641947	-0.128948	0.116109	-0.041671	-0.163547	0.080205
-89	-0.0388866	-0.218184	0.14041	0.00108196	-0.122177	0.124341	-0.0145202	-0.138862	0.109822
-88	-0.0403332	-0.214917	0.134251	-0.00583636	-0.125475	0.113803	-0.0174386	-0.14016	0.105283
-87	-0.0437033	-0.216208	0.128801	-0.00665479	-0.125482	0.112172	-0.019241	-0.138647	0.100165
-86	-0.0233788	-0.193611	0.146854	-0.0135317	-0.132514	0.10545	-0.0333648	-0.151976	0.0852464
-85	-0.0256096	-0.194718	0.143499	-0.0217768	-0.14182	0.0982666	-0.0190795	-0.138861	0.100702
-84	-0.018008	-0.186662	0.150645	-0.0104186	-0.129149	0.108312	-0.012726	-0.131817	0.106365
-83	-0.0149879	-0.181166	0.15119	-0.0223677	-0.141275	0.0965393	-0.00725114	-0.126366	0.111863
-82	-0.0187095	-0.185787	0.148368	-0.0364707	-0.153538	0.0805965	-0.023317	-0.141363	0.0947289
-81	-0.0228425	-0.189603	0.143918	-0.0416195	-0.157647	0.0744082	-0.0369815	-0.15294	0.0789774
-80	-0.03634	-0.202975	0.130295	-0.0405662	-0.15525	0.0741171	-0.0373699	-0.152687	0.077947
-79	-0.0689836	-0.233118	0.0951503	-0.0460416	-0.162722	0.0706383	-0.0496091	-0.165035	0.0658172
-78	-0.0768302	-0.240271	0.0866106	-0.0537042	-0.168217	0.0608087	-0.0545062	-0.165938	0.0569261
-77	-0.0721273	-0.236862	0.0926076	-0.0429261	-0.155275	0.0694226	-0.0583591	-0.169976	0.0532576
-76	-0.054567	-0.220708	0.111574	-0.0457342	-0.156874	0.0654053	-0.0489793	-0.160113	0.0621544
-75	-0.0674122	-0.228483	0.0936581	-0.0434832	-0.152567	0.0656009	-0.0676338	-0.178992	0.0437249
-74	-0.0714789	-0.228199	0.0852414	-0.0319052	-0.140374	0.0765639	-0.0542967	-0.16577	0.0571763
-73	-0.0532657	-0.210205	0.103673	-0.0601721	-0.167794	0.0474501	-0.0448921	-0.154341	0.064557
-72	-0.0223579	-0.175016	0.130301	-0.0555883	-0.164329	0.0531523	-0.0381557	-0.145085	0.068774
-71	-0.039602	-0.195101	0.115897	-0.0333036	-0.139666	0.0730583	-0.0447613	-0.151517	0.0619946
-70	-0.0650709	-0.223703	0.0935608	-0.0437502	-0.148805	0.0613043	-0.0484244	-0.152345	0.0554963
-69	-0.0699571	-0.226683	0.0867684	-0.0496913	-0.154494	0.0551117	-0.0551322	-0.158505	0.0482402
-68	-0.0506803	-0.201329	0.0999685	-0.0440595	-0.149225	0.0611059	-0.0570196	-0.160615	0.0465757
-67	-0.046955	-0.19266	0.0987502	-0.057172	-0.16219	0.0478459	-0.056227	-0.159462	0.0470084
-66	-0.0451747	-0.189041	0.0986916	-0.0728331	-0.175388	0.0297218	-0.0539037	-0.153271	0.0454633
-65	-0.0452763	-0.187496	0.0969439	-0.0638022	-0.162904	0.0352995	-0.0631146	-0.162196	0.0359663
-64	-0.035048	-0.177956	0.10786	-0.0560956	-0.153058	0.0408665	-0.0638614	-0.162484	0.0347609
-63	-0.0582489	-0.197146	0.0806484	-0.0590315	-0.154731	0.0366683	-0.0731169	-0.171872	0.0256382
-62	-0.0813291	-0.21396	0.0513018	-0.0365665	-0.131673	0.0585404	-0.0677564	-0.166753	0.0312399
-61	-0.0527227	-0.188582	0.0831366	-0.04426	-0.141222	0.0527025	-0.0533981	-0.151203	0.0444071
-60	-0.0197698	-0.157099	0.117559	-0.0674068	-0.163047	0.0282332	-0.0506367	-0.147409	0.0461357
-59	-0.0280484	-0.16249	0.106394	-0.0831969	-0.176499	0.0101054	-0.040822	-0.137127	0.0554832
-58	-0.0329257	-0.16425	0.0983985	-0.0627275	-0.159509	0.0340539	-0.0552257	-0.151486	0.0410342
-57	-0.0818052	-0.209589	0.0459785	-0.0642535	-0.159267	0.03076	-0.0689067	-0.161929	0.0241159
-56	-0.0822538	-0.206934	0.0424268	-0.0782233	-0.172354	0.0159077	-0.0803258	-0.174581	0.0139291
-55	-0.0774251	-0.203608	0.0487581	-0.0903061	-0.182099	0.00148677	-0.0825541	-0.174954	0.00984577
-54	-0.0421607	-0.169008	0.0846869	-0.1041	-0.193822	-0.0143771	-0.102004	-0.19185	-0.0121572
-53	-0.0628072	-0.186556	0.0609413	-0.0753722	-0.163442	0.0126981	-0.0941336	-0.183175	-0.00509178
-52	-0.0828668	-0.202347	0.0366135	-0.0683741	-0.154359	0.0176105	-0.0742512	-0.161718	0.0132161
-51	-0.0599873	-0.180943	0.0609685	-0.063796	-0.148242	0.0206499	-0.0908901	-0.178426	-0.00335449
-50	-0.0326177	-0.153429	0.0881933	-0.0672392	-0.153036	0.0185579	-0.0812191	-0.170302	0.0078635
-49	-0.0218891	-0.137776	0.0939976	-0.0692761	-0.154203	0.0156504	-0.0679002	-0.156609	0.020809
-48	-0.0607495	-0.176366	0.0548669	-0.0776718	-0.160309	0.00496509	-0.0740353	-0.159612	0.011541
-47	-0.0546456	-0.16469	0.0553986	-0.073174	-0.155292	0.00894374	-0.0919127	-0.17392	-0.00990589
-46	-0.0425228	-0.151367	0.0663219	-0.0740172	-0.154646	0.00661154	-0.109892	-0.189718	-0.0300654
-45	-0.0450046	-0.155274	0.0652651	-0.0631332	-0.142274	0.0160075	-0.10045	-0.177817	-0.0230832
-44	-0.0281707	-0.135485	0.079144	-0.0565753	-0.132724	0.0195736	-0.0855932	-0.160082	-0.0111041
-43	-0.0255664	-0.131512	0.0803791	-0.0595886	-0.13375	0.0145734	-0.0986353	-0.176487	-0.0207833
-42	-0.0500848	-0.157811	0.057641	-0.0822924	-0.159598	-0.00498684	-0.116943	-0.193316	-0.0405708
-41	-0.0110617	-0.119299	0.0971753	-0.09973	-0.176311	-0.0231489	-0.0941115	-0.170055	-0.0181681
-40	-0.0113787	-0.114217	0.0914593	-0.109318	-0.18636	-0.0322759	-0.0920556	-0.166552	-0.0175591
-39	-0.0453567	-0.147372	0.0566585	-0.0988119	-0.172535	-0.0250883	-0.0965931	-0.168487	-0.0246989
-38	-0.06129	-0.165802	0.0432223	-0.0877846	-0.160834	-0.0147351	-0.085234	-0.157605	-0.0128626
-37	-0.0521068	-0.155367	0.0511535	-0.0734163	-0.145999	-0.000833244	-0.131203	-0.203586	-0.0588204
-36	-0.045304	-0.146958	0.0563497	-0.0660925	-0.138669	0.0064841	-0.1147	-0.187836	-0.0415636
-35	-0.055335	-0.157418	0.0467482	-0.0471835	-0.118387	0.0240199	-0.111448	-0.182582	-0.040314
-34	-0.0252119	-0.123746	0.0733223	-0.0695368	-0.138668	-0.000405462	-0.112022	-0.182039	-0.042005
-33	-0.0065651	-0.101853	0.0887224	-0.0582552	-0.12633	0.00981927	-0.0974274	-0.165227	-0.0296283
-32	-0.00222609	-0.0984472	0.093995	-0.0591679	-0.127775	0.00943926	-0.0879095	-0.155956	-0.0198629
-31	-0.0166558	-0.108577	0.0752652	-0.0638163	-0.130834	0.00320103	-0.0794843	-0.14879	-0.0101786
-30	-0.0334969	-0.126722	0.0597281	-0.068501	-0.136854	-0.000148484	-0.103256	-0.168783	-0.0377294
-29	-0.0314951	-0.122325	0.0593349	-0.0608231	-0.130012	0.00836571	-0.109768	-0.17385	-0.045686
-28	0.00171088	-0.0861923	0.0896141	-0.0617538	-0.128058	0.00455034	-0.106461	-0.168942	-0.0439802
-27	-0.00948836	-0.0951781	0.0762014	-0.0762286	-0.142685	-0.00977244	-0.0875292	-0.148717	-0.0263415
-26	-0.0329284	-0.116201	0.0503438	-0.0511385	-0.112419	0.0101421	-0.0639185	-0.124268	-0.00356905
-25	-0.0199472	-0.0996176	0.0597232	-0.038358	-0.10101	0.024294	-0.0642637	-0.124861	-0.00366662
-24	0.0190398	-0.0604469	0.0985266	-0.0395693	-0.10233	0.0231917	-0.0682221	-0.126796	-0.00964837
-23	-0.0031423	-0.0828697	0.0765851	-0.044832	-0.105889	0.0162254	-0.0636958	-0.119936	-0.00745589
-22	-0.0238408	-0.101061	0.0533792	-0.0738208	-0.134487	-0.013155	-0.0681126	-0.124661	-0.0115643
-21	5.20262e-05	-0.0782164	0.0783205	-0.0699826	-0.129336	-0.0106289	-0.0571008	-0.114454	0.000252238
-20	0.0116978	-0.067197	0.0905927	-0.0593212	-0.11986	0.0012171	-0.0730656	-0.129911	-0.0162206
-19	0.0168477	-0.0620562	0.0957516	-0.0566329	-0.114642	0.00137662	-0.0719224	-0.128831	-0.0150143
-18	0.0122263	-0.0638861	0.0883387	-0.0367372	-0.0943099	0.0208355	-0.0702104	-0.125356	-0.0150646
-17	-0.00295233	-0.0813053	0.0754007	-0.0212138	-0.0783219	0.0358944	-0.0655648	-0.120828	-0.0103015
-16	-0.00841718	-0.0797035	0.0628692	-0.00924035	-0.0642033	0.0457227	-0.059874	-0.1112	-0.00854848
-15	0.000927392	-0.0736611	0.0755159	-0.03493	-0.0927754	0.0229153	-0.0720923	-0.123047	-0.0211379
-14	-0.00929713	-0.0863454	0.0677512	-0.0311785	-0.0851417	0.0227847	-0.0844754	-0.13347	-0.0354807
-13	-0.0117328	-0.0841995	0.0607338	-0.0455022	-0.0978426	0.00683829	-0.0791341	-0.128649	-0.0296188
-12	0.00767478	-0.0604583	0.0758078	-0.0579009	-0.109194	-0.00660778	-0.071203	-0.121838	-0.0205678
-11	0.0111188	-0.0557456	0.0779832	-0.0359472	-0.0886073	0.016713	-0.0667895	-0.117011	-0.0165678
-10	-0.0120122	-0.0795482	0.0555238	-0.0138288	-0.0633323	0.0356747	-0.0389055	-0.0862449	0.00843386
-9	-0.0108622	-0.0737329	0.0520084	-0.0192021	-0.0657735	0.0273692	-0.0429534	-0.0886059	0.00269902
-8	0.00418675	-0.0617475	0.070121	-0.0236649	-0.0694466	0.0221167	-0.0482347	-0.0939334	-0.00253591
-7	-0.00559554	-0.0709815	0.0597904	-0.0399682	-0.0854571	0.00552072	-0.0345322	-0.0801789	0.0111144
-6	-0.0076375	-0.0718597	0.0565846	-0.0403524	-0.0852993	0.00459459	-0.0529897	-0.0956608	-0.0103186
-5	-0.0398319	-0.103761	0.0240975	-0.0125854	-0.0585726	0.0334018	-0.0587349	-0.102211	-0.0152589
-4	-0.0534522	-0.112546	0.00564172	0.000327297	-0.0427905	0.0434451	-0.0549139	-0.0955159	-0.0143119
-3	-0.0347596	-0.0871782	0.017659	-0.00620564	-0.0456809	0.0332697	-0.0360072	-0.0715152	-0.000499146
-2	0.00558865	-0.0422216	0.0533989	-0.0309227	-0.0691652	0.00731984	-0.0211723	-0.0560716	0.0137271
-1	-0.0113094	-0.0482902	0.0256714	-0.0198132	-0.0488052	0.00917874	-0.0109838	-0.0376515	0.0156839
0	0	0	0	0	0	0	0	0	0
1	0.000273772	-0.0348171	0.0353647	0.00611927	-0.0219565	0.034195	-0.0163945	-0.0456572	0.0128682
2	-0.0175107	-0.0627882	0.0277668	-0.0100855	-0.0481533	0.0279822	-0.0274342	-0.063763	0.00889469
3	-0.0210323	-0.0718802	0.0298156	-0.0124491	-0.0540488	0.0291507	-0.0173149	-0.0524979	0.0178681
4	-0.00537284	-0.0602325	0.0494868	-0.0168232	-0.059073	0.0254267	-0.0314879	-0.0712331	0.00825735
5	-0.0193924	-0.0779809	0.039196	-0.00530588	-0.0468293	0.0362176	-0.0366455	-0.0783145	0.00502357
6	0.00620026	-0.0530739	0.0654744	-0.000608781	-0.0424259	0.0412083	-0.0167877	-0.0606665	0.0270911
7	0.0148193	-0.0438559	0.0734946	0.0249906	-0.0190514	0.0690326	-0.0115248	-0.0562913	0.0332417
8	-0.0331544	-0.0957704	0.0294615	0.0187338	-0.0275185	0.0649861	-0.00241425	-0.0457527	0.0409242
9	-0.0219031	-0.0865401	0.0427338	0.0159009	-0.0297436	0.0615454	-0.000819467	-0.0449122	0.0432733
10	-0.0028669	-0.0671854	0.0614516	0.0112691	-0.0354427	0.0579809	-0.0104949	-0.0565375	0.0355477
11	0.0094741	-0.0555454	0.0744936	0.0178349	-0.0296717	0.0653415	-0.020198	-0.0673326	0.0269367
12	-0.00334119	-0.0694495	0.0627671	0.0104247	-0.0389968	0.0598462	-0.0235898	-0.0720092	0.0248297
13	0.019656	-0.0471762	0.0864883	0.0252687	-0.0235521	0.0740895	-0.0132295	-0.0617983	0.0353394
14	0.00617843	-0.0613206	0.0736775	0.00794639	-0.0412079	0.0571006	-0.0212398	-0.0725208	0.0300412
15	0.0250078	-0.0416076	0.0916233	-0.0183221	-0.0697402	0.033096	-0.020208	-0.0714068	0.0309907
16	0.0368724	-0.0286557	0.1024	0.0134422	-0.0392224	0.0661067	-0.0328993	-0.0829579	0.0171592
17	0.02234	-0.0461968	0.0908768	0.00585323	-0.0465254	0.0582318	-0.0402657	-0.090636	0.0101047
18	0.0011863	-0.0664539	0.0688265	0.00292779	-0.0479529	0.0538084	-0.0304975	-0.0815912	0.0205962
19	0.0129113	-0.0557512	0.0815739	-0.0254016	-0.0806227	0.0298195	-0.0412521	-0.0924391	0.00993498
20	0.0250768	-0.0454646	0.0956182	-0.0299431	-0.0856458	0.0257597	-0.0733334	-0.126415	-0.0202522
21	0.0238624	-0.0486186	0.0963433	-0.0323594	-0.0876318	0.022913	-0.0513163	-0.108285	0.0056519
22	0.0212133	-0.0539694	0.096396	-0.0411079	-0.099789	0.0175732	-0.0513023	-0.105854	0.00324962
23	0.0284617	-0.0490058	0.105929	-0.0236498	-0.084997	0.0376973	-0.032308	-0.0880238	0.0234077
24	0.035437	-0.0374434	0.108317	-0.0199497	-0.0836049	0.0437054	-0.0467995	-0.103474	0.00987519
25	0.0427299	-0.0330942	0.118554	-0.0187198	-0.0804273	0.0429878	-0.0567195	-0.113231	-0.000208481
26	-0.00985935	-0.0877913	0.0680726	0.0111222	-0.048251	0.0704954	-0.0615984	-0.120518	-0.00267839
27	-0.011805	-0.0888183	0.0652084	-0.002002	-0.0630405	0.0590365	-0.065686	-0.127175	-0.00419721
28	0.0249073	-0.0551307	0.104945	-0.00773711	-0.0727283	0.0572541	-0.0356473	-0.0987084	0.0274137
29	0.0313797	-0.0566471	0.119407	0.0210544	-0.0426908	0.0847997	-0.0584211	-0.120157	0.00331449
30	0.00231202	-0.0813113	0.0859353	0.0217573	-0.0432259	0.0867406	-0.0448843	-0.108761	0.0189924
31	0.00377989	-0.0804948	0.0880546	0.0152927	-0.0550306	0.0856161	-0.0279269	-0.0916805	0.0358267
32	0.0262301	-0.0574718	0.109932	0.00561711	-0.0643647	0.0755989	-0.0276833	-0.0919068	0.0365402
33	0.00429269	-0.0829371	0.0915225	0.0218693	-0.0493999	0.0931385	-0.0391733	-0.104096	0.0257493
34	0.00117928	-0.0862995	0.0886581	-0.00255207	-0.0730541	0.0679499	-0.0386257	-0.104857	0.0276056
35	0.000151439	-0.0873799	0.0876828	0.0046603	-0.0661346	0.0754552	-0.0358038	-0.102353	0.030745
36	-0.00661729	-0.0983348	0.0851003	0.00138861	-0.0695171	0.0722943	-0.0113395	-0.0815348	0.0588559
37	0.00796504	-0.0843635	0.100294	-0.000949848	-0.0740493	0.0721496	-0.0133405	-0.0817263	0.0550454
38	0.0243278	-0.0698043	0.11846	-0.000642661	-0.071786	0.0705006	-0.0280614	-0.0990345	0.0429117
39	-0.0203422	-0.114978	0.0742931	0.0293817	-0.0433076	0.102071	-0.0192023	-0.0902842	0.0518797
40	-0.0308849	-0.123452	0.0616822	-0.000632871	-0.0733763	0.0721106	-0.00376927	-0.0766306	0.069092
41	-0.0018605	-0.095755	0.092034	-0.0144757	-0.0895576	0.0606062	-0.017915	-0.0917554	0.0559253
42	0.00271316	-0.0929316	0.0983579	-0.00848184	-0.0839952	0.0670315	-0.0276841	-0.102028	0.04666
43	-0.00845485	-0.102823	0.0859132	7.61908e-05	-0.0751174	0.0752697	-0.0133932	-0.0879989	0.0612126
44	-0.00343088	-0.0972557	0.090394	-0.0058753	-0.0823099	0.0705593	-0.034423	-0.11116	0.0423144
45	-0.00586687	-0.104286	0.0925528	0.00344691	-0.0752159	0.0821097	-0.0361968	-0.115573	0.0431796
46	0.0112683	-0.0930736	0.11561	0.00753018	-0.0723593	0.0874197	-0.040004	-0.118047	0.0380388
47	0.0487766	-0.0537599	0.151313	-0.0336533	-0.113768	0.0464616	-0.0333934	-0.112883	0.0460962
48	0.0352203	-0.0666712	0.137112	-0.0174896	-0.097516	0.0625368	-0.0503012	-0.13099	0.0303874
49	-0.000392013	-0.1033	0.102516	-0.0202021	-0.0998139	0.0594098	-0.0334131	-0.113975	0.0471491
50	-0.000743147	-0.106283	0.104797	-0.0189683	-0.100026	0.0620896	-0.0387986	-0.120526	0.042929
51	0.00723058	-0.101971	0.116433	-0.0391797	-0.12035	0.0419901	-0.0508453	-0.133488	0.0317978
52	0.00493299	-0.105623	0.115489	-0.019791	-0.0994524	0.0598705	-0.0461124	-0.127059	0.034834
53	0.00352893	-0.11114	0.118198	-0.0203347	-0.101936	0.0612665	-0.0397697	-0.121746	0.042207
54	-0.00830024	-0.123593	0.106993	-0.0520815	-0.136829	0.0326661	-0.0692275	-0.152771	0.0143162
55	-0.0179287	-0.131003	0.0951455	-0.0478469	-0.132953	0.0372589	-0.0752279	-0.160089	0.00963338
56	-0.00663698	-0.119972	0.106698	-0.0582136	-0.142691	0.0262642	-0.0527195	-0.13863	0.0331905
57	-0.0167109	-0.134839	0.101417	-0.0415479	-0.128311	0.0452151	-0.0422109	-0.12795	0.0435278
58	-0.0349133	-0.159223	0.0893969	-0.0366066	-0.127026	0.0538125	-0.0443608	-0.130963	0.0422411
59	-0.0159818	-0.139933	0.107969	-0.0273621	-0.116918	0.0621934	-0.076644	-0.166532	0.0132438
60	-0.0100647	-0.130847	0.110717	-0.0443161	-0.134043	0.0454105	-0.106377	-0.199678	-0.0130763
61	-0.0305922	-0.152181	0.0909962	-0.0569354	-0.149288	0.0354176	-0.0771393	-0.169367	0.0150882
62	-0.0509757	-0.173938	0.071987	-0.0853088	-0.178457	0.00783983	-0.0421573	-0.134171	0.0498566
63	-0.0537557	-0.180076	0.0725647	-0.0712602	-0.164483	0.0219621	-0.0776154	-0.170361	0.0151303
64	-0.0427781	-0.172528	0.0869718	-0.0767285	-0.173367	0.0199101	-0.0845654	-0.179429	0.0102979
65	-0.0569028	-0.187793	0.0739874	-0.0663741	-0.163079	0.0303312	-0.102577	-0.19593	-0.00922518
66	-0.0386358	-0.170251	0.0929797	-0.0487731	-0.147883	0.0503366	-0.144082	-0.239207	-0.0489559
67	-0.0432983	-0.18147	0.094873	-0.0692295	-0.170641	0.0321824	-0.121949	-0.218502	-0.025395
68	-0.0572432	-0.199821	0.0853348	-0.0778201	-0.180098	0.0244576	-0.110573	-0.207512	-0.0136346
69	-0.0602739	-0.202639	0.0820909	-0.103913	-0.206968	-0.000857469	-0.117624	-0.215801	-0.0194469
70	-0.0352529	-0.17377	0.103264	-0.101047	-0.20701	0.00491707	-0.123191	-0.223684	-0.0226978
71	-0.0662861	-0.208326	0.0757539	-0.095554	-0.200727	0.00961914	-0.108001	-0.209801	-0.00620225
72	-0.0588736	-0.205202	0.0874546	-0.0954824	-0.199439	0.00847441	-0.104361	-0.207829	-0.000893786
73	-0.0448449	-0.187772	0.0980823	-0.112425	-0.217996	-0.00685289	-0.110063	-0.215005	-0.00512201
74	-0.0379967	-0.180161	0.104168	-0.12409	-0.227322	-0.020857	-0.106935	-0.211587	-0.00228177
75	-0.051119	-0.198003	0.0957654	-0.113385	-0.217771	-0.00899885	-0.131205	-0.233355	-0.0290549
76	-0.0617985	-0.20773	0.0841334	-0.10397	-0.210674	0.00273306	-0.136611	-0.241977	-0.0312448
77	-0.0418236	-0.18713	0.103483	-0.137573	-0.244604	-0.0305418	-0.104097	-0.208674	0.000480264
78	-0.0232559	-0.16814	0.121628	-0.149012	-0.254484	-0.0435399	-0.104397	-0.208918	0.000125265
79	-0.0256005	-0.174818	0.123617	-0.135702	-0.245468	-0.0259357	-0.0895352	-0.195836	0.0167659
80	-0.0508363	-0.202936	0.101263	-0.142419	-0.253513	-0.0313252	-0.0657183	-0.17326	0.0418238
81	-0.0480993	-0.201293	0.105095	-0.127811	-0.235878	-0.0197446	-0.061063	-0.169059	0.0469327
82	-0.0490284	-0.20261	0.104553	-0.108996	-0.21796	-3.17281e-05	-0.0728211	-0.179318	0.0336761
83	-0.0439618	-0.198813	0.110889	-0.12529	-0.237095	-0.0134839	-0.0533679	-0.162943	0.0562072
84	-0.0412988	-0.202061	0.119463	-0.111482	-0.224997	0.0020333	-0.028348	-0.139358	0.0826625
85	-0.0588868	-0.222387	0.104613	-0.0778	-0.190958	0.0353581	-0.0174592	-0.131128	0.0962096
86	-0.0691228	-0.229571	0.0913249	-0.073715	-0.18919	0.0417598	0.00223766	-0.109856	0.114331
87	-0.0760075	-0.236411	0.084396	-0.0644731	-0.177636	0.0486898	0.0232179	-0.0902256	0.136661
88	-0.0914654	-0.258018	0.0750874	-0.0316857	-0.145662	0.0822903	0.0242047	-0.0886347	0.137044
89	-0.0846792	-0.252907	0.0835485	-0.0159016	-0.130428	0.0986244	0.0551121	-0.0582347	0.168459
90	-0.083713	-0.250192	0.0827663	-0.0183064	-0.134427	0.097814	0.0867566	-0.0269052	0.200418
91	-0.10196	-0.267349	0.06343	0.0183379	-0.0997442	0.13642	0.0963939	-0.018248	0.211036
92	-0.0684331	-0.232052	0.0951856	0.0463658	-0.0736392	0.166371	0.152183	0.0372308	0.267135
93	-0.0813608	-0.244391	0.0816696	0.0728163	-0.047536	0.193169	0.167632	0.0515262	0.283738
94	-0.0995644	-0.264479	0.0653507	0.122725	0.00251633	0.242933	0.198401	0.083001	0.313802
95	-0.101453	-0.273369	0.0704634	0.153308	0.0309026	0.275714	0.230095	0.117323	0.342867
96	-0.0908429	-0.263177	0.0814915	0.168803	0.0450329	0.292573	0.277345	0.162597	0.392094
97	-0.0775487	-0.253548	0.0984507	0.184951	0.0637542	0.306148	0.302	0.184478	0.419523
98	-0.0746689	-0.250994	0.101656	0.249124	0.126879	0.371369	0.354354	0.233976	0.474731
99	-0.0550632	-0.227055	0.116929	0.295085	0.174716	0.415454	0.380216	0.257398	0.503033
100	-0.0421164	-0.210589	0.126356	0.299524	0.177932	0.421116	0.41089	0.287848	0.533933
101	-0.0396713	-0.20981	0.130467	0.33165	0.205985	0.457314	0.402499	0.279412	0.525585
102	-0.0484542	-0.222154	0.125245	0.371721	0.246637	0.496806	0.449225	0.324817	0.573634
103	-0.0531736	-0.230204	0.123857	0.379271	0.254578	0.503964	0.499088	0.376796	0.621379
104	-0.0522916	-0.228085	0.123502	0.446495	0.321817	0.571173	0.530901	0.409626	0.652176
105	-0.0542679	-0.231594	0.123058	0.509391	0.382323	0.636459	0.592554	0.469058	0.716049
106	-0.0534903	-0.23083	0.12385	0.50007	0.371919	0.628221	0.635808	0.511361	0.760254
107	-0.0298576	-0.209993	0.150278	0.526177	0.39804	0.654314	0.663014	0.536536	0.789492
108	-0.0322394	-0.214894	0.150415	0.576972	0.446813	0.707131	0.662099	0.535051	0.789147
109	-0.0479649	-0.235561	0.139632	0.610633	0.477139	0.744128	0.718363	0.591573	0.845153
110	-0.0479499	-0.236606	0.140706	0.643408	0.508207	0.778608	0.739677	0.614374	0.86498
111	-0.0414208	-0.228074	0.145232	0.682971	0.551472	0.81447	0.788843	0.662723	0.914963
112	-0.0358178	-0.225683	0.154047	0.693455	0.564423	0.822486	0.830793	0.703234	0.958352
113	-0.0577876	-0.246468	0.130893	0.70013	0.571635	0.828624	0.856548	0.726623	0.986474
114	-0.0230391	-0.213897	0.167818	0.747193	0.616012	0.878374	0.886471	0.756017	1.01692
115	-0.0314746	-0.226522	0.163573	0.769764	0.636239	0.903289	0.913835	0.782787	1.04488
116	-0.0191464	-0.214639	0.176347	0.809631	0.677117	0.942146	0.949091	0.817736	1.08045
117	-0.0310301	-0.224021	0.161961	0.864707	0.73242	0.996993	0.99432	0.863342	1.1253
118	-0.0566964	-0.249813	0.136421	0.88401	0.74941	1.01861	1.04045	0.910298	1.17061
119	-0.0710502	-0.260772	0.118672	0.896086	0.758324	1.03385	1.0521	0.919627	1.18457
120	-0.0892569	-0.279181	0.100667	0.944894	0.809296	1.08049	1.07077	0.936716	1.20483
121	-0.0892401	-0.281704	0.103224	0.989856	0.851918	1.12779	1.08765	0.952827	1.22247
122	-0.109171	-0.306957	0.0886157	0.986307	0.846849	1.12576	1.10523	0.971393	1.23907
123	-0.0925309	-0.291043	0.105981	1.00193	0.861407	1.14245	1.12121	0.986124	1.2563
124	-0.090628	-0.287217	0.105961	0.995944	0.856113	1.13578	1.16652	1.0322	1.30083
125	-0.0766473	-0.272104	0.118809	1.01703	0.877551	1.15651	1.19395	1.06143	1.32646
126	-0.0716799	-0.27295	0.12959	1.04304	0.902866	1.18321	1.18663	1.05158	1.32169
127	-0.0510148	-0.251962	0.149932	1.06277	0.919988	1.20555	1.2231	1.08673	1.35947
128	-0.0948342	-0.294785	0.105116	1.07488	0.934314	1.21544	1.27362	1.13592	1.41131
129	-0.0889607	-0.291757	0.113835	1.09833	0.956518	1.24014	1.27188	1.13289	1.41086
130	-0.0738848	-0.280303	0.132534	1.1471	1.00363	1.29058	1.29369	1.15378	1.43359
131	-0.0799598	-0.285573	0.125653	1.18063	1.03824	1.32302	1.32513	1.18526	1.465
132	-0.107476	-0.312368	0.0974163	1.17868	1.03607	1.32128	1.32144	1.1805	1.46238
133	-0.114252	-0.317203	0.0886979	1.19562	1.0553	1.33594	1.36171	1.2198	1.50361
134	-0.110847	-0.31082	0.0891265	1.25568	1.11418	1.39718	1.38052	1.23796	1.52309
135	-0.0678166	-0.271716	0.136083	1.26429	1.12282	1.40576	1.40967	1.26828	1.55105
136	-0.0613692	-0.271115	0.148376	1.27923	1.13508	1.42337	1.43964	1.29631	1.58297
137	-0.0803706	-0.293076	0.132334	1.27116	1.127	1.41531	1.47797	1.33506	1.62088
138	-0.0631096	-0.269928	0.143709	1.30231	1.15762	1.44699	1.49255	1.34756	1.63754
139	-0.0460757	-0.257991	0.16584	1.3017	1.15818	1.44522	1.47066	1.32345	1.61787
140	-0.0573087	-0.269403	0.154786	1.34276	1.1962	1.48932	1.469	1.32462	1.61339
141	-0.0643423	-0.277918	0.149233	1.35198	1.2027	1.50127	1.50336	1.35975	1.64698
142	-0.0916305	-0.306311	0.12305	1.37101	1.22158	1.52043	1.51556	1.37008	1.66105
143	-0.097591	-0.315732	0.12055	1.38212	1.23187	1.53238	1.53478	1.38911	1.68045
144	-0.0858042	-0.300465	0.128857	1.40546	1.25911	1.55182	1.55635	1.40816	1.70454
145	-0.0751317	-0.29066	0.140397	1.43461	1.28743	1.58179	1.57369	1.42528	1.7221
146	-0.049905	-0.264637	0.164827	1.4352	1.28907	1.58133	1.5789	1.42963	1.72818
147	-0.0248531	-0.240448	0.190742	1.44784	1.30084	1.59484	1.62162	1.47194	1.77131
148	-0.0143646	-0.232184	0.203455	1.45385	1.30403	1.60366	1.61438	1.46319	1.76557
149	-0.0568378	-0.275191	0.161516	1.46451	1.31286	1.61616	1.60633	1.4556	1.75707
150	-0.0743066	-0.292413	0.1438	1.49445	1.34295	1.64594	1.63818	1.4861	1.79025
151	-0.100836	-0.316718	0.115046	1.52604	1.3772	1.67489	1.65893	1.50598	1.81187
152	-0.0836479	-0.304035	0.136739	1.54469	1.39311	1.69627	1.67599	1.52411	1.82786
153	-0.0735786	-0.295851	0.148694	1.54337	1.39035	1.69639	1.67193	1.52093	1.82293
154	-0.0655332	-0.288659	0.157592	1.53091	1.37683	1.68499	1.69292	1.5399	1.84594
155	-0.057761	-0.280588	0.165066	1.55185	1.39596	1.70773	1.69598	1.54067	1.8513
156	-0.0491862	-0.271312	0.172939	1.56023	1.40465	1.71582	1.71331	1.55761	1.86902
157	-0.0557176	-0.279636	0.1682	1.59341	1.43823	1.74858	1.72355	1.56714	1.87996
158	-0.0617334	-0.288641	0.165174	1.60395	1.44758	1.76032	1.72646	1.56642	1.8865
159	-0.0887261	-0.314703	0.13725	1.63073	1.47221	1.78925	1.73736	1.57882	1.89589
160	-0.0728471	-0.297554	0.15186	1.63876	1.48053	1.79699	1.74273	1.58238	1.90309
161	-0.085248	-0.315316	0.14482	1.63958	1.47979	1.79938	1.7293	1.56898	1.88962
162	-0.0813753	-0.312454	0.149704	1.64605	1.48467	1.80744	1.73119	1.57062	1.89177
163	-0.0922978	-0.322185	0.137589	1.65029	1.48977	1.81082	1.77825	1.61747	1.93903
164	-0.0775379	-0.309843	0.154767	1.69196	1.53107	1.85285	1.80709	1.64621	1.96798
165	-0.0708982	-0.299984	0.158187	1.67984	1.51869	1.84099	1.79223	1.63144	1.95302
166	-0.037574	-0.26438	0.189232	1.66814	1.509	1.82728	1.79508	1.6344	1.95575
167	-0.0307464	-0.261126	0.199633	1.66775	1.5092	1.8263	1.80712	1.6447	1.96954
168	-0.0726836	-0.304808	0.159441	1.69627	1.53718	1.85536	1.83254	1.66863	1.99646
169	-0.0877717	-0.322013	0.146469	1.70876	1.5484	1.86913	1.85625	1.69158	2.02091
170	-0.0768953	-0.311397	0.157607	1.71818	1.55974	1.87661	1.83923	1.67482	2.00364
171	-0.0857242	-0.320493	0.149045	1.70946	1.54683	1.8721	1.84132	1.6783	2.00434
172	-0.0938262	-0.327928	0.140276	1.70084	1.53874	1.86294	1.85433	1.68929	2.01936
173	-0.0804223	-0.312744	0.151899	1.72219	1.56127	1.88311	1.88183	1.71627	2.04738
174	-0.105654	-0.341394	0.130086	1.74835	1.58428	1.91242	1.88317	1.71476	2.05158
175	-0.102977	-0.337514	0.13156	1.74725	1.58346	1.91104	1.88578	1.71604	2.05553
176	-0.117946	-0.354813	0.118921	1.74739	1.58457	1.91022	1.90588	1.73694	2.07482
177	-0.106304	-0.342	0.129391	1.76511	1.60021	1.93001	1.93724	1.76901	2.10548
178	-0.107533	-0.342594	0.127528	1.77847	1.61389	1.94306	1.90348	1.73526	2.07171
179	-0.105084	-0.341513	0.131345	1.76916	1.60646	1.93186	1.90662	1.73763	2.0756
180	-0.0905902	-0.330329	0.149149	1.77035	1.60496	1.93574	1.91885	1.75057	2.08714
181	-0.116905	-0.356528	0.122718	1.784	1.618	1.95001	1.93227	1.76369	2.10086
182	-0.101168	-0.34376	0.141425	1.78049	1.61594	1.94505	1.9352	1.76489	2.1055
183	-0.0829604	-0.325544	0.159623	1.77453	1.60917	1.93989	1.91871	1.74678	2.09063
184	-0.0722771	-0.311124	0.16657	1.77695	1.60727	1.94663	1.9165	1.74168	2.09132
185	-0.0682469	-0.30682	0.170326	1.76807	1.59993	1.93621	1.92728	1.75311	2.10146
186	-0.0747418	-0.314154	0.16467	1.75681	1.58832	1.9253	1.942	1.76752	2.11649
187	-0.0824032	-0.319797	0.154991	1.76576	1.59709	1.93442	1.9301	1.7537	2.1065
188	-0.0904676	-0.328614	0.147679	1.76426	1.59628	1.93224	1.93974	1.7649	2.11458
189	-0.0841027	-0.31954	0.151334	1.75689	1.58846	1.92532	1.95658	1.78146	2.13169
190	-0.0838085	-0.317748	0.150131	1.77551	1.6048	1.94622	1.94736	1.77263	2.1221
191	-0.0770447	-0.314209	0.16012	1.78503	1.61464	1.95542	1.93546	1.75895	2.11196
192	-0.0984519	-0.33863	0.141726	1.74932	1.57968	1.91896	1.93515	1.75876	2.11153
193	-0.0758332	-0.31616	0.164494	1.74595	1.575	1.9169	1.94299	1.7648	2.12118
194	-0.0523071	-0.296678	0.192064	1.75316	1.58164	1.92467	1.91796	1.73984	2.09608
195	-0.0256318	-0.271382	0.220118	1.75551	1.58542	1.92561	1.93034	1.74859	2.11208
196	-0.0158752	-0.263534	0.231783	1.76186	1.59044	1.93328	1.9245	1.74041	2.10858
197	-0.0167393	-0.263964	0.230486	1.75755	1.5847	1.93039	1.91802	1.73602	2.10003
198	-0.0312352	-0.276361	0.213891	1.7354	1.56456	1.90624	1.92723	1.74516	2.1093
199	-0.0300024	-0.276613	0.216608	1.73726	1.56549	1.90904	1.92946	1.74552	2.11341
200	-0.0306822	-0.276043	0.214678	1.7283	1.55562	1.90097	1.89708	1.71225	2.0819

## Sheet: Panel_B
time	vEyeVelControl_Mean	vEyeVelControl_95ci_low	vEyeVelControl_95ci_up	vEyeVelLeft_Mean	vEyeVelLeft_95ci_low	vEyeVelLeft_95ci_up	vEyeVelRight_Mean	vEyeVelRight_95ci_low	vEyeVelRight_95ci_up
-100	4.78357	-1.9114	11.4785	6.9832	1.13	12.8364	2.87365	-3.30922	9.05652
-99	4.20391	-2.43194	10.8398	5.49386	-0.305006	11.2927	3.06327	-2.99658	9.12311
-98	3.22366	-3.30818	9.7555	3.84441	-1.85517	9.54399	2.79387	-3.10929	8.69702
-97	2.15865	-4.24593	8.56324	2.2498	-3.32089	7.82049	2.25449	-3.47279	7.98177
-96	1.24334	-5.06275	7.54943	0.869955	-4.54567	6.28558	1.68308	-3.85054	7.2167
-95	0.611826	-5.6383	6.86195	-0.255425	-5.50931	4.99846	1.29375	-4.02436	6.61185
-94	0.34592	-5.85688	6.54872	-1.16013	-6.25421	3.93395	1.18017	-3.89544	6.25577
-93	0.587892	-5.57354	6.74932	-1.86443	-6.80492	3.07606	1.34152	-3.48793	6.17098
-92	1.15818	-4.9445	7.26086	-2.35211	-7.16006	2.45585	1.74033	-2.88354	6.36419
-91	1.99039	-4.06164	8.04243	-2.76937	-7.49038	1.95163	2.18568	-2.31092	6.68227
-90	2.8207	-3.20951	8.85091	-3.26531	-7.95331	1.4227	2.52532	-1.92381	6.97446
-89	3.46725	-2.52689	9.4614	-3.66689	-8.36092	1.02715	2.6394	-1.81177	7.09058
-88	3.61975	-2.33361	9.57311	-4.06903	-8.76479	0.62672	2.3904	-2.05858	6.83937
-87	3.21591	-2.67103	9.10286	-4.40332	-9.06859	0.261956	1.69014	-2.70696	6.08725
-86	2.25409	-3.56407	8.07224	-4.6782	-9.25834	-0.0980525	0.643476	-3.6515	4.93845
-85	0.756581	-5.01605	6.52921	-4.86184	-9.31908	-0.404612	-0.611996	-4.77988	3.55589
-84	-0.91577	-6.69181	4.86027	-4.87412	-9.23191	-0.516323	-1.97275	-6.04737	2.10187
-83	-2.67349	-8.52619	3.17921	-4.69695	-9.02414	-0.36977	-3.22006	-7.29022	0.850106
-82	-4.18547	-10.1562	1.78528	-4.35366	-8.72758	0.0202589	-4.15721	-8.32253	0.00811234
-81	-5.11467	-11.2068	0.977464	-3.82328	-8.27857	0.632004	-4.61654	-8.9504	-0.282686
-80	-5.43104	-11.6044	0.742365	-3.10105	-7.63308	1.43098	-4.65248	-9.14981	-0.155148
-79	-5.1173	-11.3036	1.06896	-2.29129	-6.85889	2.27632	-4.22489	-8.81957	0.369801
-78	-4.24253	-10.3544	1.86931	-1.54104	-6.09729	3.01521	-3.42003	-8.01358	1.17351
-77	-2.97035	-8.96406	3.02336	-0.914986	-5.41785	3.58787	-2.37844	-6.88701	2.13012
-76	-1.43319	-7.31541	4.44904	-0.524341	-4.95293	3.90425	-1.37679	-5.74759	2.99401
-75	-0.0982475	-5.91267	5.71617	-0.288454	-4.62778	4.05087	-0.510636	-4.75261	3.73134
-74	0.92194	-4.8715	6.71538	-0.267643	-4.51242	3.97713	0.0156595	-4.16004	4.19136
-73	1.57449	-4.25021	7.39918	-0.386936	-4.55938	3.78551	0.1812	-4.00088	4.36328
-72	1.81592	-4.06593	7.69777	-0.669754	-4.8204	3.48089	0.0417699	-4.20007	4.28361
-71	1.77662	-4.16369	7.71694	-0.954842	-5.15014	3.24046	-0.282077	-4.59536	4.0312
-70	1.52968	-4.44752	7.50689	-1.1394	-5.43899	3.16019	-0.715387	-5.10266	3.67188
-69	1.21356	-4.77254	7.19965	-1.23865	-5.66119	3.18388	-1.09743	-5.53966	3.3448
-68	0.853389	-5.12534	6.83212	-1.17715	-5.71476	3.36046	-1.27234	-5.74509	3.20042
-67	0.649465	-5.3315	6.63043	-1.09596	-5.7165	3.52458	-1.22279	-5.69094	3.24535
-66	0.551897	-5.44838	6.55218	-1.0207	-5.69597	3.65457	-1.0104	-5.42368	3.40289
-65	0.40802	-5.64149	6.45753	-1.06499	-5.7593	3.62933	-0.688999	-4.99904	3.62104
-64	0.191432	-5.91258	6.29545	-1.25309	-5.95018	3.444	-0.445863	-4.63269	3.74097
-63	-0.186146	-6.33385	5.96156	-1.58241	-6.24802	3.0832	-0.421626	-4.51317	3.66992
-62	-0.622024	-6.77345	5.5294	-2.03433	-6.6444	2.57573	-0.641308	-4.71993	3.43731
-61	-1.21503	-7.34651	4.91645	-2.50967	-7.04637	2.02703	-1.1319	-5.29712	3.03333
-60	-1.76259	-7.84783	4.32265	-2.87686	-7.34178	1.58807	-1.72082	-6.05317	2.61154
-59	-2.11733	-8.17383	3.93917	-3.11322	-7.53907	1.31263	-2.40795	-6.92009	2.10419
-58	-2.26474	-8.32259	3.79311	-3.02802	-7.47404	1.41801	-3.02832	-7.66828	1.61164
-57	-2.14839	-8.21792	3.92114	-2.65014	-7.15982	1.85954	-3.39267	-8.07975	1.29441
-56	-1.60421	-7.70903	4.50062	-2.01217	-6.61469	2.59034	-3.40096	-8.05203	1.25011
-55	-0.853501	-6.98902	5.28202	-1.12073	-5.79942	3.55795	-3.1753	-7.73238	1.38177
-54	0.0789289	-6.0519	6.20976	-0.106506	-4.80876	4.59575	-2.72113	-7.17212	1.72986
-53	1.07222	-4.99928	7.14373	0.803833	-3.86625	5.47391	-2.1762	-6.55644	2.20403
-52	2.0154	-3.95286	7.98367	1.50511	-3.10253	6.11274	-1.72005	-6.08843	2.64833
-51	2.78128	-3.07542	8.63797	1.87463	-2.67585	6.42511	-1.3062	-5.72422	3.11182
-50	3.32998	-2.40938	9.06934	1.80266	-2.7428	6.34812	-1.12695	-5.62401	3.37011
-49	3.60856	-2.02676	9.24388	1.2597	-3.32946	5.84885	-1.1356	-5.70815	3.43695
-48	3.5559	-1.98921	9.10102	0.483275	-4.18414	5.1507	-1.25954	-5.86864	3.34955
-47	3.24326	-2.23261	8.71913	-0.555013	-5.27254	4.16251	-1.49296	-6.09919	3.11328
-46	2.62338	-2.82458	8.07134	-1.56055	-6.26505	3.14395	-1.76621	-6.34561	2.81319
-45	1.79927	-3.66546	7.264	-2.3197	-6.93658	2.29719	-1.99116	-6.5333	2.55099
-44	0.984191	-4.52273	6.49111	-2.67131	-7.14025	1.79764	-2.08545	-6.59356	2.42265
-43	0.200043	-5.34361	5.74369	-2.63361	-6.95222	1.68499	-2.03591	-6.51595	2.44413
-42	-0.402179	-5.94164	5.13728	-2.11085	-6.31698	2.09529	-1.86621	-6.30891	2.57648
-41	-0.735358	-6.19693	4.72621	-1.12304	-5.29088	3.04479	-1.63619	-6.01501	2.74263
-40	-0.697696	-6.04488	4.64949	0.0551645	-4.13829	4.24861	-1.41773	-5.68424	2.84879
-39	-0.442487	-5.70194	4.81696	1.29608	-2.96388	5.55604	-1.11599	-5.24101	3.00903
-38	0.0640679	-5.17478	5.30291	2.31218	-2.03139	6.65575	-0.784443	-4.77943	3.21055
-37	0.88076	-4.44229	6.20381	3.01358	-1.40529	7.43245	-0.467364	-4.3689	3.43417
-36	1.75118	-3.77374	7.2761	3.38966	-1.08858	7.8679	-0.0145792	-3.88228	3.85312
-35	2.4398	-3.32962	8.20922	3.38196	-1.13893	7.90285	0.478039	-3.42657	4.38265
-34	2.88478	-3.10162	8.87118	3.05937	-1.49408	7.61282	1.06828	-2.93574	5.0723
-33	3.1389	-2.95955	9.23735	2.57832	-1.99318	7.14981	1.71691	-2.42533	5.85914
-32	3.10356	-2.97515	9.18227	1.97914	-2.58953	6.54781	2.41086	-1.89447	6.7162
-31	2.85616	-3.12209	8.83441	1.40491	-3.13244	5.94226	3.09764	-1.36292	7.55821
-30	2.54415	-3.32004	8.40833	0.896168	-3.58738	5.37972	3.65983	-0.892954	8.21261
-29	2.21166	-3.59173	8.01505	0.586473	-3.83559	5.00854	4.06653	-0.482352	8.61541
-28	2.01854	-3.82801	7.86508	0.401046	-3.99739	4.79948	4.32608	-0.124717	8.77687
-27	2.07121	-3.90393	8.04635	0.435394	-3.98698	4.85776	4.39835	0.112216	8.68448
-26	2.12185	-3.98597	8.22968	0.646531	-3.83626	5.12932	4.16223	0.042841	8.28161
-25	2.20802	-3.92897	8.34501	0.932341	-3.6362	5.50088	3.67966	-0.335772	7.6951
-24	2.35243	-3.6936	8.39845	1.24312	-3.39666	5.8829	2.9372	-1.08166	6.95606
-23	2.3596	-3.48644	8.20565	1.61912	-3.03985	6.27809	1.99551	-2.10285	6.09388
-22	2.10727	-3.4893	7.70384	1.99927	-2.63986	6.6384	1.09668	-3.09028	5.28365
-21	1.6664	-3.72828	7.06109	2.40237	-2.17884	6.98358	0.156932	-4.0962	4.41007
-20	1.12993	-4.17179	6.43165	2.67789	-1.82571	7.18148	-0.559582	-4.83165	3.71249
-19	0.58548	-4.72545	5.89641	2.81719	-1.62199	7.25637	-0.954961	-5.22035	3.31043
-18	0.109479	-5.27285	5.49181	2.723	-1.69598	7.14198	-0.998846	-5.2602	3.26251
-17	-0.284659	-5.7519	5.18258	2.45118	-2.01654	6.9189	-0.703823	-4.99225	3.5846
-16	-0.621727	-6.16372	4.92027	2.09652	-2.4681	6.66114	-0.151011	-4.49569	4.19367
-15	-0.809794	-6.44153	4.82194	1.66564	-3.01958	6.35087	0.611823	-3.79221	5.01586
-14	-1.03653	-6.80222	4.72916	1.22227	-3.55749	6.00204	1.38899	-3.05107	5.82905
-13	-1.39167	-7.32279	4.53944	0.89014	-3.91483	5.69511	2.12344	-2.31741	6.5643
-12	-1.75009	-7.85197	4.35178	0.828047	-3.93246	5.58855	2.7078	-1.70269	7.11829
-11	-2.07818	-8.29018	4.13382	0.922526	-3.75857	5.60362	3.06987	-1.28763	7.42738
-10	-2.40551	-8.6387	3.82769	1.19946	-3.39683	5.79575	3.35941	-0.94312	7.66194
-9	-2.64499	-8.83204	3.54207	1.57906	-2.96137	6.11949	3.59388	-0.662705	7.85046
-8	-2.69319	-8.82904	3.44267	1.96961	-2.5508	6.49002	3.72892	-0.502885	7.96073
-7	-2.43816	-8.58762	3.71129	2.27457	-2.23201	6.78115	3.85772	-0.381453	8.0969
-6	-1.85268	-8.07574	4.37038	2.43556	-2.01561	6.88673	3.89168	-0.366689	8.15005
-5	-1.10573	-7.42125	5.20979	2.40066	-1.9705	6.77183	3.88941	-0.370583	8.14941
-4	-0.268317	-6.64423	6.1076	2.25886	-2.01053	6.52825	3.79396	-0.428768	8.01669
-3	0.537899	-5.82128	6.89707	2.02099	-2.16568	6.20767	3.58511	-0.5674	7.73762
-2	1.2485	-5.0624	7.55939	1.82793	-2.31721	5.97306	3.25187	-0.82107	7.32482
-1	1.64366	-4.61592	7.90325	1.66326	-2.48352	5.81004	2.77671	-1.23344	6.78687
0	1.75284	-4.47895	7.98462	1.7507	-2.4093	5.91071	2.29266	-1.71217	6.2975
1	1.56031	-4.66224	7.78286	2.01208	-2.15768	6.18183	1.83114	-2.2186	5.88088
2	1.18917	-4.98745	7.36578	2.30838	-1.85646	6.47322	1.45633	-2.66065	5.57331
3	0.778079	-5.29672	6.85288	2.70706	-1.46549	6.87961	1.19144	-2.98193	5.36481
4	0.503236	-5.4297	6.43618	3.01181	-1.16226	7.18588	1.03464	-3.16666	5.23594
5	0.470621	-5.31016	6.2514	3.20709	-0.956192	7.37036	0.936751	-3.28158	5.15508
6	0.693501	-4.99733	6.38433	3.22215	-0.911665	7.35597	0.948266	-3.28453	5.18106
7	1.13571	-4.53346	6.80488	2.99617	-1.10347	7.09581	0.851736	-3.4133	5.11677
8	1.77679	-3.9618	7.51538	2.55117	-1.52357	6.62591	0.575115	-3.73445	4.88468
9	2.42224	-3.42598	8.27045	1.81039	-2.27963	5.9004	0.0702019	-4.28019	4.42059
10	3.01058	-2.94049	8.96166	0.800767	-3.3426	4.94413	-0.608923	-4.96952	3.75168
11	3.3975	-2.60585	9.40084	-0.37966	-4.59124	3.83192	-1.43775	-5.79279	2.91729
12	3.6438	-2.35361	9.64122	-1.69611	-5.96301	2.57079	-2.33634	-6.68646	2.01378
13	3.552	-2.39896	9.50296	-2.88137	-7.18466	1.42191	-3.15711	-7.50869	1.19446
14	3.25676	-2.61786	9.13138	-3.93937	-8.25908	0.380343	-3.86488	-8.23637	0.50661
15	2.80417	-2.98553	8.59386	-4.84438	-9.18706	-0.501702	-4.26907	-8.6576	0.119455
16	2.32217	-3.42301	8.06735	-5.38812	-9.76726	-1.00899	-4.40841	-8.78734	-0.0294925
17	1.81735	-3.96508	7.59979	-5.43866	-9.84841	-1.0289	-4.29918	-8.63073	0.0323689
18	1.26797	-4.58917	7.12512	-4.98263	-9.40474	-0.560513	-4.01823	-8.27489	0.23844
19	0.751593	-5.1951	6.69828	-4.07217	-8.49811	0.353767	-3.53498	-7.72732	0.657362
20	0.313927	-5.72096	6.34881	-2.69042	-7.12257	1.74173	-2.92913	-7.11134	1.25308
21	-0.124585	-6.2319	5.98274	-1.01727	-5.46502	3.43047	-2.28926	-6.54704	1.96852
22	-0.543334	-6.68162	5.59495	0.756036	-3.72271	5.23478	-1.65327	-6.058	2.75147
23	-0.848935	-6.96457	5.2667	2.4869	-2.02181	6.99561	-0.986755	-5.55779	3.58428
24	-1.1835	-7.23045	4.86345	3.93848	-0.590391	8.46735	-0.282539	-4.98231	4.41724
25	-1.38834	-7.33671	4.56002	4.86148	0.321113	9.40186	0.403789	-4.33993	5.14751
26	-1.53709	-7.41249	4.33831	5.27209	0.720947	9.82322	1.04533	-3.66092	5.75157
27	-1.61044	-7.45357	4.23269	5.1442	0.583458	9.70494	1.69009	-2.90783	6.28802
28	-1.66472	-7.54545	4.21601	4.45682	-0.101038	9.01468	2.25994	-2.19909	6.71897
29	-1.60548	-7.58943	4.37847	3.41803	-1.10306	7.93911	2.73615	-1.59938	7.07168
30	-1.59361	-7.6944	4.50718	2.2863	-2.15591	6.72851	3.16407	-1.09309	7.42123
31	-1.62694	-7.75668	4.50279	1.0364	-3.30559	5.37838	3.48677	-0.741696	7.71523
32	-1.73299	-7.72718	4.2612	-0.0598211	-4.35137	4.23173	3.6966	-0.530478	7.92367
33	-1.93767	-7.66318	3.78785	-0.827456	-5.15431	3.49939	3.68961	-0.536457	7.91568
34	-2.1551	-7.53923	3.22903	-1.32013	-5.75519	3.11493	3.53891	-0.669933	7.74776
35	-2.27405	-7.37322	2.82512	-1.53806	-6.09329	3.01716	3.21149	-0.955842	7.37883
36	-2.24388	-7.23157	2.74382	-1.57747	-6.19365	3.03871	2.64318	-1.47266	6.75903
37	-1.97104	-7.02393	3.08185	-1.4265	-6.01453	3.16153	1.9419	-2.13973	6.02353
38	-1.41754	-6.64945	3.81438	-1.34103	-5.81833	3.13627	1.05017	-3.02349	5.12383
39	-0.61255	-6.00433	4.77923	-1.29084	-5.64289	3.06121	0.108201	-3.9935	4.2099
40	0.338492	-5.08048	5.75746	-1.22984	-5.49632	3.03663	-0.743649	-4.88299	3.39569
41	1.44599	-3.86964	6.76163	-1.36357	-5.63746	2.91032	-1.51436	-5.68618	2.65747
42	2.39946	-2.79093	7.58986	-1.52446	-5.8517	2.80279	-2.16848	-6.35986	2.0229
43	3.02115	-2.12857	8.17088	-1.77873	-6.14886	2.5914	-2.74134	-6.93507	1.4524
44	3.26549	-2.03461	8.56558	-2.16004	-6.51827	2.19819	-3.05922	-7.23553	1.11709
45	3.06951	-2.54261	8.68163	-2.60243	-6.8662	1.66135	-3.14599	-7.29447	1.0025
46	2.42058	-3.55829	8.39946	-3.00248	-7.12136	1.1164	-3.04242	-7.16574	1.08091
47	1.37843	-4.89299	7.64984	-3.31852	-7.30843	0.6714	-2.89798	-7.00902	1.21307
48	0.192191	-6.20668	6.59106	-3.53844	-7.46233	0.385444	-2.75033	-6.87162	1.37095
49	-1.05174	-7.42823	5.32474	-3.61754	-7.56204	0.326949	-2.53576	-6.68297	1.61145
50	-2.22646	-8.51474	4.06183	-3.55779	-7.58449	0.46891	-2.38317	-6.56651	1.80016
51	-3.11736	-9.3004	3.06569	-3.40434	-7.54201	0.733319	-2.30483	-6.54088	1.93122
52	-3.80287	-9.90384	2.2981	-3.22089	-7.45642	1.01463	-2.17257	-6.45807	2.11293
53	-4.25921	-10.3084	1.78996	-2.95584	-7.26462	1.35293	-2.10358	-6.42815	2.22099
54	-4.38345	-10.3911	1.62418	-2.81394	-7.15241	1.52454	-2.10431	-6.45892	2.25029
55	-4.34496	-10.3277	1.63782	-2.62954	-6.98416	1.72508	-2.20637	-6.57907	2.16634
56	-4.37697	-10.349	1.59505	-2.53795	-6.90859	1.83269	-2.39382	-6.76705	1.97941
57	-4.3194	-10.3143	1.67552	-2.57108	-6.97582	1.83367	-2.7524	-7.10954	1.60475
58	-4.26676	-10.3114	1.77791	-2.71089	-7.16719	1.74542	-3.34028	-7.65067	0.970114
59	-4.24734	-10.3243	1.82962	-2.84211	-7.34537	1.66115	-4.02538	-8.25283	0.202084
60	-4.18524	-10.233	1.8625	-2.98763	-7.51021	1.53494	-4.81269	-8.92693	-0.698449
61	-4.0182	-9.9812	1.9448	-3.20126	-7.71819	1.31567	-5.49291	-9.48959	-1.49622
62	-3.78763	-9.66899	2.09374	-3.34645	-7.8601	1.16719	-6.02016	-9.93458	-2.10574
63	-3.45544	-9.35047	2.43959	-3.4846	-8.02791	1.0587	-6.27834	-10.1749	-2.38175
64	-2.98225	-9.0048	3.0403	-3.63679	-8.24983	0.97624	-6.19696	-10.1585	-2.23538
65	-2.45287	-8.7056	3.79985	-3.87793	-8.56446	0.808591	-5.78128	-9.87765	-1.68491
66	-1.86948	-8.35365	4.61469	-4.08048	-8.79472	0.633747	-5.0822	-9.33781	-0.826583
67	-1.2933	-7.89666	5.31006	-4.41388	-9.09095	0.263193	-4.18845	-8.57234	0.195445
68	-0.718888	-7.29932	5.86154	-4.84208	-9.40943	-0.274737	-3.20011	-7.62953	1.22932
69	-0.159284	-6.57381	6.25524	-5.16649	-9.58937	-0.74361	-2.19332	-6.56172	2.17508
70	0.379972	-5.77733	6.53727	-5.53052	-9.84558	-1.21547	-1.25863	-5.45131	2.93406
71	0.868996	-5.05484	6.79283	-5.84896	-10.1383	-1.5596	-0.429472	-4.38394	3.52499
72	1.30532	-4.4887	7.09934	-6.04058	-10.3882	-1.69293	0.335477	-3.39403	4.06499
73	1.69811	-4.05176	7.44798	-6.02154	-10.4636	-1.57949	1.10627	-2.49254	4.70507
74	1.94574	-3.8313	7.72279	-5.80651	-10.3139	-1.29915	2.05365	-1.5682	5.67549
75	1.96574	-3.85117	7.78264	-5.23793	-9.73338	-0.742477	3.16796	-0.596649	6.93258
76	1.78754	-4.05671	7.63179	-4.27992	-8.67084	0.110998	4.3678	0.424471	8.31113
77	1.41931	-4.43731	7.27593	-2.95941	-7.18976	1.27094	5.65399	1.56627	9.74171
78	0.683395	-5.19186	6.55865	-1.3543	-5.42989	2.72129	7.02694	2.86334	11.1906
79	-0.291739	-6.20627	5.62279	0.556989	-3.43478	4.54876	8.44522	4.26569	12.6248
80	-1.35731	-7.36369	4.64907	2.61916	-1.3893	6.62761	9.78604	5.60939	13.9627
81	-2.52349	-8.63683	3.58986	4.76273	0.669099	8.85637	11.1241	6.93515	15.313
82	-3.63912	-9.80861	2.53037	7.016	2.81805	11.214	12.2933	8.09371	16.4929
83	-4.57988	-10.7391	1.57937	9.25672	4.97564	13.5378	13.4503	9.24439	17.6563
84	-5.24462	-11.3022	0.812986	11.3828	7.05323	15.7124	14.6386	10.4385	18.8388
85	-5.72491	-11.6441	0.194321	13.3823	9.00719	17.7573	16.0233	11.8228	20.2237
86	-5.82129	-11.6292	-0.0133561	15.3704	10.9473	19.7936	17.5844	13.3653	21.8034
87	-5.60763	-11.3768	0.161593	17.3197	12.8381	21.8013	19.4837	15.2309	23.7364
88	-5.08169	-10.9031	0.739745	19.312	14.7865	23.8375	21.5778	17.3	25.8557
89	-4.26763	-10.1792	1.64392	21.4485	16.9192	25.9779	23.7616	19.5106	28.0125
90	-3.16646	-9.12882	2.7959	23.4959	18.9911	28.0007	26.0078	21.8134	30.2022
91	-1.80927	-7.73244	4.11389	25.3978	20.9351	29.8605	28.0539	23.9299	32.178
92	-0.338049	-6.1225	5.4464	27.3351	22.8986	31.7716	29.7193	25.6192	33.8195
93	1.09716	-4.45878	6.6531	29.0659	24.6292	33.5025	31.0352	26.8758	35.1946
94	2.48102	-2.82886	7.7909	30.4366	26.0063	34.867	32.0249	27.7357	36.3141
95	3.76908	-1.34487	8.88302	31.5397	27.1338	35.9456	32.5617	28.1212	37.0021
96	4.74269	-0.30657	9.79195	32.3327	27.9759	36.6894	32.8912	28.3467	37.4356
97	5.34043	0.173449	10.5074	32.812	28.5114	37.1126	33.0884	28.5314	37.6455
98	5.52083	0.0865728	10.9551	33.216	28.9513	37.4806	33.2323	28.7496	37.7149
99	5.36223	-0.390013	11.1145	33.5616	29.2899	37.8332	33.4375	29.0933	37.7817
100	4.81425	-1.19268	10.8212	33.7592	29.4507	38.0676	33.7836	29.5902	37.977
101	4.07935	-2.05956	10.2183	33.9875	29.6405	38.3346	34.2643	30.1732	38.3554
102	3.17378	-2.96508	9.31264	34.1649	29.828	38.5017	34.7906	30.7247	38.8565
103	2.32934	-3.70335	8.36203	34.1427	29.879	38.4064	35.3139	31.2081	39.4197
104	1.63846	-4.23916	7.51607	33.9761	29.8249	38.1273	35.6657	31.498	39.8334
105	1.17089	-4.57286	6.91465	33.6879	29.6766	37.6992	35.8494	31.6381	40.0608
106	1.06829	-4.59002	6.7266	33.0967	29.1848	37.0086	35.9005	31.6902	40.1108
107	1.10898	-4.54612	6.76408	32.3029	28.4083	36.1975	35.7371	31.5732	39.9009
108	1.36456	-4.35117	7.08028	31.5378	27.5738	35.5018	35.5318	31.4301	39.6334
109	1.59265	-4.21067	7.39597	30.8019	26.6897	34.9141	35.3149	31.2486	39.3813
110	1.64297	-4.25144	7.53739	30.3337	26.0543	34.613	35.0582	30.9729	39.1435
111	1.30292	-4.63433	7.24017	30.163	25.7556	34.5704	34.7576	30.5976	38.9177
112	0.506013	-5.38825	6.40028	30.3178	25.8353	34.8002	34.5131	30.2618	38.7644
113	-0.755764	-6.5672	5.05567	30.6106	26.1058	35.1153	34.046	29.7158	38.3761
114	-2.24445	-7.95752	3.46862	30.918	26.4219	35.4142	33.3192	28.9659	37.6725
115	-3.89547	-9.56039	1.76945	31.1056	26.6309	35.5802	32.3429	28.0245	36.6614
116	-5.4402	-11.122	0.241575	30.8333	26.3723	35.2943	31.1372	26.8797	35.3947
117	-6.56772	-12.3255	-0.809994	29.9476	25.4919	34.4032	29.6283	25.4192	33.8375
118	-7.052	-12.8662	-1.23781	28.5986	24.1442	33.0529	28.0302	23.8178	32.2425
119	-6.8572	-12.6474	-1.06697	26.6947	22.2288	31.1606	26.4461	22.1782	30.714
120	-6.00458	-11.6844	-0.324717	24.3275	19.8722	28.7828	25.0274	20.6875	29.3673
121	-4.74073	-10.2438	0.762327	22.0957	17.666	26.5255	23.8737	19.4903	28.2572
122	-3.29048	-8.65518	2.07422	20.1709	15.7987	24.5432	23.0325	18.6586	27.4064
123	-1.85265	-7.17232	3.46701	18.8334	14.5393	23.1275	22.5431	18.2105	26.8757
124	-0.743409	-6.14518	4.65837	18.2032	13.982	22.4244	22.2437	17.9625	26.5249
125	-0.133728	-5.68243	5.41498	18.4256	14.2498	22.6015	22.2632	18.0103	26.516
126	0.0121085	-5.64715	5.67136	19.2198	15.0563	23.3833	22.4313	18.1809	26.6816
127	-0.223847	-5.89232	5.44463	20.4908	16.3229	24.6587	22.6417	18.3941	26.8893
128	-0.458539	-6.047	5.12992	21.901	17.7375	26.0646	22.9409	18.7255	27.1564
129	-0.65601	-6.12976	4.81774	23.0585	18.9105	27.2065	23.2059	19.0286	27.3833
130	-0.530185	-5.92551	4.86514	23.7626	19.6406	27.8845	23.3639	19.2323	27.4954
131	-0.0719216	-5.47353	5.32968	23.8426	19.7382	27.9469	23.3345	19.2198	27.4492
132	0.644613	-4.83555	6.12478	23.3125	19.2096	27.4155	23.0643	18.9455	27.1832
133	1.45915	-4.12791	7.04622	22.3152	18.1886	26.4417	22.3848	18.2542	26.5154
134	2.1321	-3.591	7.8552	21.1	16.9313	25.2688	21.5031	17.3677	25.6384
135	2.62864	-3.20606	8.46333	19.7931	15.5652	24.0211	20.4102	16.2874	24.533
136	2.74489	-3.18249	8.67227	18.5299	14.2549	22.8048	19.1095	14.9794	23.2397
137	2.65407	-3.31641	8.62454	17.5498	13.2449	21.8547	17.7677	13.5865	21.949
138	2.28845	-3.65888	8.23578	16.8392	12.5397	21.1387	16.5441	12.2809	20.8072
139	1.89833	-3.98919	7.78585	16.4739	12.2149	20.733	15.5454	11.2071	19.8837
140	1.57947	-4.26203	7.42097	16.3583	12.1478	20.5689	14.8068	10.4351	19.1785
141	1.42976	-4.41145	7.27097	16.3309	12.1465	20.5153	14.5057	10.1657	18.8457
142	1.33982	-4.59591	7.27556	16.3769	12.1854	20.5684	14.455	10.1943	18.7158
143	1.42506	-4.6215	7.47161	16.3734	12.1615	20.5853	14.5265	10.3672	18.6857
144	1.44012	-4.66664	7.54688	16.3255	12.1177	20.5332	14.745	10.6673	18.8228
145	1.32659	-4.73517	7.38835	16.0917	11.9238	20.2596	14.911	10.8509	18.971
146	0.966563	-4.95743	6.89056	15.7412	11.6267	19.8558	14.9074	10.812	19.0028
147	0.527821	-5.24057	6.29621	15.3852	11.2785	19.4918	14.8459	10.6647	19.0271
148	-0.0153477	-5.69248	5.66178	15.0265	10.8457	19.2074	14.5691	10.2865	18.8518
149	-0.482729	-6.20036	5.2349	14.6012	10.3098	18.8926	14.0608	9.71523	18.4063
150	-0.933715	-6.78395	4.91652	14.1787	9.77226	18.5851	13.3789	9.03212	17.7257
151	-1.20298	-7.1889	4.78293	13.8837	9.406	18.3614	12.653	8.36556	16.9405
152	-1.31371	-7.36855	4.74112	13.7709	9.263	18.2789	11.8324	7.63613	16.0287
153	-1.35315	-7.40679	4.70048	13.7085	9.20285	18.2141	10.9776	6.84981	15.1055
154	-1.30204	-7.31562	4.71154	13.7151	9.20082	18.2294	10.1733	6.04988	14.2968
155	-1.21974	-7.17494	4.73545	13.6693	9.11497	18.2236	9.43249	5.23333	13.6317
156	-1.19122	-7.09736	4.71492	13.5768	8.96754	18.186	8.82799	4.52012	13.1359
157	-1.07912	-6.92288	4.76464	13.3775	8.73255	18.0225	8.44274	4.04335	12.8421
158	-0.885043	-6.66501	4.89492	13.0422	8.39303	17.6913	8.31564	3.88604	12.7452
159	-0.640231	-6.39383	5.11337	12.4559	7.82973	17.0821	8.4228	4.04506	12.8005
160	-0.191968	-5.9567	5.57276	11.5945	7.01122	16.1777	8.79417	4.5274	13.0609
161	0.314106	-5.51431	6.14252	10.6305	6.08731	15.1736	9.38475	5.23226	13.5372
162	0.843136	-5.08833	6.7746	9.58157	5.08638	14.0768	9.92689	5.84076	14.013
163	1.16076	-4.85796	7.17948	8.52311	4.0885	12.9577	10.3883	6.27396	14.5027
164	1.26706	-4.7768	7.31092	7.57802	3.21799	11.938	10.8539	6.63083	15.077
165	0.937937	-5.02016	6.89604	6.8557	2.57356	11.1378	11.0679	6.71055	15.4253
166	0.166659	-5.61001	5.94333	6.38609	2.16691	10.6053	11.0789	6.62697	15.5308
167	-0.945064	-6.49175	4.60162	6.18179	1.96987	10.3937	10.9135	6.43392	15.3931
168	-2.3024	-7.63414	3.02934	6.28214	2.02346	10.5408	10.702	6.26104	15.1431
169	-3.65192	-8.85488	1.55105	6.64725	2.29906	10.9954	10.4623	6.08633	14.8382
170	-4.76652	-9.98517	0.452136	7.07831	2.64549	11.5111	10.242	5.92269	14.5612
171	-5.48688	-10.7975	-0.176251	7.56795	3.06481	12.0711	9.98416	5.68828	14.28
172	-5.66574	-11.0703	-0.261186	7.9609	3.42032	12.5015	9.65924	5.34736	13.9711
173	-5.31128	-10.7831	0.160534	8.19226	3.62973	12.7548	9.29605	4.95796	13.6341
174	-4.39971	-9.90666	1.10724	8.16814	3.58775	12.7485	8.74984	4.40699	13.0927
175	-3.19081	-8.74008	2.35846	7.87287	3.26734	12.4784	7.97605	3.6755	12.2766
176	-1.72362	-7.35215	3.90492	7.21756	2.59521	11.8399	7.08704	2.85653	11.3175
177	-0.231579	-5.96146	5.4983	6.21721	1.60058	10.8338	6.12741	1.94189	10.3129
178	1.25871	-4.56838	7.0858	5.06978	0.50648	9.63307	5.07347	0.871756	9.27519
179	2.42877	-3.44797	8.3055	3.67275	-0.801875	8.14737	4.04763	-0.224342	8.31959
180	3.23714	-2.63013	9.10441	2.27518	-2.11171	6.66206	3.327	-1.0303	7.6843
181	3.52721	-2.29641	9.35083	0.998093	-3.32845	5.32464	2.80083	-1.58636	7.18801
182	3.35247	-2.43348	9.13842	-0.0885545	-4.40828	4.23117	2.52106	-1.81213	6.85424
183	2.89973	-2.86149	8.66094	-0.959167	-5.29961	3.38127	2.40311	-1.81779	6.62402
184	2.28434	-3.44681	8.01549	-1.49694	-5.86748	2.87361	2.29897	-1.80071	6.39864
185	1.60422	-4.07269	7.28113	-1.78707	-6.16772	2.59358	2.21729	-1.81445	6.24903
186	1.1494	-4.44645	6.74524	-1.81212	-6.17384	2.54961	2.09471	-1.9516	6.14102
187	1.16403	-4.34571	6.67377	-1.61242	-5.93764	2.7128	1.77343	-2.33661	5.88347
188	1.63166	-3.82608	7.0894	-1.44625	-5.75258	2.86007	1.16651	-3.00346	5.33649
189	2.66361	-2.80641	8.13363	-1.37671	-5.68775	2.93434	0.366223	-3.81871	4.55116
190	3.98863	-1.58079	9.55805	-1.37882	-5.71084	2.9532	-0.55097	-4.70476	3.60282
191	5.42991	-0.280618	11.1404	-1.49718	-5.84491	2.85055	-1.42064	-5.51033	2.66904
192	6.59329	0.765752	12.4208	-1.803	-6.16182	2.55582	-2.28305	-6.32119	1.75509
193	7.23389	1.37293	13.0949	-2.25551	-6.61869	2.10766	-2.91115	-6.93871	1.1164
194	7.18739	1.36464	13.0101	-2.83813	-7.20279	1.52653	-3.25592	-7.3138	0.801963
195	6.26259	0.502476	12.0227	-3.42094	-7.78802	0.946147	-3.26287	-7.37376	0.848014
196	4.67172	-1.07757	10.421	-4.02881	-8.40322	0.345601	-2.98252	-7.16186	1.19682
197	2.59306	-3.20799	8.39411	-4.50384	-8.87767	-0.130006	-2.41005	-6.64936	1.82927
198	0.24292	-5.64433	6.13017	-4.87583	-9.24314	-0.508506	-1.62524	-5.90424	2.65375
199	-1.87625	-7.82113	4.06864	-5.12997	-9.4656	-0.794333	-0.730088	-5.0302	3.57003
200	-3.55694	-9.45227	2.3384	-5.22436	-9.51457	-0.934157	0.201818	-4.084	4.48764

## Sheet: Panel_C
time	trial 1	trial 2	trial 3	trial 4	trial 5	trial 6	trial 7	trial 8	trial 9	trial 10	trial 11	trial 12	trial 13	trial 14	trial 15
-99	-0.66005	-0.0307122	-0.704967	1.12467	-1.91694	-1.03901	0.527208	0.427136	-0.523089	-1.62773	1.60673	-1.37758	1.16684	1.4748	1.13404
-98	-0.66005	-0.0307122	-0.704967	0.931275	-1.6275	-1.08724	0.283054	0.655197	-0.600088	-1.62773	1.26185	-1.11635	1.16684	1.07102	1.07822
-97	-0.501377	0.136461	-0.861973	0.892986	-1.6275	-1.08724	0.210988	0.655197	-0.600088	-1.62513	1.26185	-1.11635	1.07671	1.07102	1.06838
-96	-0.473203	0.136461	-0.872505	0.688873	-1.6275	-0.892914	0.210988	0.655197	-0.581439	-1.49744	1.31527	-1.11635	1.02573	1.16633	1.07822
-95	-0.473203	0.136461	-0.872505	0.65222	-1.41823	-0.892914	0.978055	0.650088	-0.581439	-1.47349	1.39007	-1.17206	1.02573	1.29975	1.15899
-94	-0.681436	0.134044	-0.848253	0.351748	-1.3436	-0.892914	0.978055	0.533081	-0.698322	-1.47349	1.39007	-1.17206	1.07908	1.38161	1.31266
-93	-0.745585	-0.0282884	-0.848253	0.351748	-1.18411	-0.682866	0.357082	0.512261	-0.698322	-1.59055	1.39007	-1.35618	1.09806	1.38161	1.45583
-92	-0.745585	-0.0282884	-0.848253	0.549689	-1.10715	-0.643326	0.0832093	0.512261	-0.698322	-1.76076	1.32596	-1.35618	1.07908	1.38161	1.45583
-91	-0.745585	0.207706	-0.634408	0.684355	-1.00062	-0.643326	-0.0225842	0.586261	-0.793871	-1.76076	1.16114	-1.28128	1.02097	1.2729	1.18656
-90	-0.730374	0.207706	-0.558489	0.684355	-1.00062	-0.643326	0.0832093	0.721572	-0.878883	-1.76076	1.16114	-1.11635	0.774298	1.07879	1.15899
-89	-0.730374	-0.0021002	-0.297101	0.684355	-0.897435	-0.683393	0.0112152	0.742843	-0.878883	-1.77403	1.36644	-1.11635	0.774298	1.07879	1.15899
-88	-0.730374	-0.0021002	-0.254987	0.611645	-0.897435	-0.624543	0.0112152	0.742843	-0.554946	-1.77403	1.47168	-1.5255	1.05896	0.903722	1.15899
-87	-0.807455	-0.0069693	-0.254987	0.467362	-0.897435	-0.683393	-0.160938	0.705827	-0.554946	-1.41501	1.47168	-1.5255	1.13482	0.855736	1.03358
-86	-1.11414	0.10448	-0.596459	0.441947	-0.977178	-0.927402	-0.163776	0.631363	-0.669043	-1.40968	1.31527	-1.43549	1.13482	0.73584	0.998099
-85	-1.1417	0.118576	-0.596459	0.441947	-0.977178	-1.106	-0.248424	0.631363	-0.809841	-0.904345	1.26414	-1.37537	1.10168	0.73584	0.866136
-84	-1.11414	0.189769	-0.366686	0.568815	-0.977178	-1.106	-0.248424	0.339482	-0.809841	-0.904345	1.31527	-1.37537	0.6735	0.77823	0.621859
-83	-1.05393	0.416132	-0.366686	0.617833	-1.08038	-0.706693	-0.248424	0.196619	-0.780567	-1.11977	1.26414	-1.37537	0.509952	0.813373	0.621859
-82	-0.867688	0.416132	-0.596459	0.688873	-1.25879	-0.706693	-0.245574	0.138383	-0.780567	-1.19421	1.10773	-1.17394	0.509952	0.77823	0.792568
-81	-0.867688	-0.0141996	-0.596459	0.691146	-1.386	-1.36066	-0.245574	-0.108943	-1.03288	-1.24479	1.09022	-1.17394	0.27267	0.762598	0.866136
-80	-0.867688	-0.0331253	-0.499441	0.757666	-1.52151	-1.38198	-0.245574	-0.167201	-1.03288	-1.35916	1.09022	-1.17394	0.27267	0.762598	0.792568
-79	-0.647114	-0.200293	-0.181276	0.757666	-1.5934	-1.39515	-0.208937	-0.199128	-0.846942	-1.44423	1.04296	-0.927483	0.27267	0.945511	0.866136
-78	-0.647114	-0.200293	-0.181276	0.768373	-1.5934	-1.38198	-0.208937	-0.199128	-0.509664	-1.44423	0.402784	-0.91274	0.101889	0.945511	0.886466
-77	-0.657806	-0.200293	-0.216981	0.768373	-1.60124	-1.32869	-0.208937	-0.143395	-0.509664	-1.53736	0.402784	-0.781742	0.101889	0.820626	1.06838
-76	-0.732639	-0.0568584	-0.283358	0.497757	-1.60124	-1.21142	0.0168818	0.336941	-0.509664	-1.53736	0.706565	-0.781742	0.307053	0.478238	1.06838
-75	-0.657806	0.176698	-0.335097	0.497757	-1.60124	-1.13745	0.0254542	0.336941	-0.605357	-1.51075	0.801063	-0.865526	0.307053	0.478238	0.792568
-74	-0.37247	0.176698	-0.405585	0.497757	-1.52151	-1.13745	0.067758	0.336941	-0.605357	-1.51075	0.891078	-0.865526	0.307053	0.985147	0.792568
-73	-0.276284	0.277482	-0.405585	0.38164	-1.02786	-1.17755	0.0832093	0.310602	-0.634608	-1.51873	0.801063	-0.779925	0.66047	0.985147	1.17674
-72	-0.276284	0.170865	-0.24533	0.201826	-1.02786	-1.17755	0.220791	-0.0663757	-0.73811	-1.51873	0.910197	-0.779925	0.716206	0.443677	1.17674
-71	-0.648734	-0.084013	-0.213758	0.149938	-0.934772	-0.884766	0.237029	-0.0663757	-0.916007	-1.14372	1.09249	-1.08835	0.716206	0.443677	0.785338
-70	-0.648734	-0.123244	-0.213758	0.149938	-0.995603	-0.839621	0.32736	-0.0663757	-0.937294	-1.0479	1.09249	-1.08835	0.713862	0.908185	0.59433
-69	-0.58005	-0.197882	-0.115805	0.128514	-0.995603	-0.73363	0.237029	-0.225974	-0.916007	-1.0479	1.08408	-0.882468	0.602391	1.13676	0.551569
-68	-0.531186	-0.123244	-0.10117	0.128514	-0.995603	-0.669692	0.0140441	-0.225974	-0.894777	-1.06917	0.677419	-0.882468	0.3865	1.26671	0.551569
-67	-0.441144	-0.0544506	-0.070479	0.0321239	-0.966577	-0.669692	0.0140441	0.199133	-0.894777	-1.14372	0.593503	-0.882468	0.3865	1.28286	0.551569
-66	-0.441144	0.20869	-0.070479	0.0321239	-0.923654	-0.922359	0.0140441	0.294383	-1.12315	-1.06917	0.593503	-0.996117	0.493262	1.28286	0.572583
-65	-0.533448	0.20869	-0.112578	0.275221	-0.751315	-0.922359	-0.0120056	0.294383	-1.29838	-1.24479	0.794914	-1.00681	0.493262	1.28286	0.572583
-64	-0.533448	0.0367498	-0.112578	0.49159	-0.613506	-0.68035	-0.0120056	0.294383	-1.45236	-1.19425	1.08572	-1.00681	0.497974	1.30405	0.572583
-63	-0.685352	0.0095281	-0.112578	0.49159	-0.613506	-0.374938	-0.0522852	0.323769	-1.45236	-1.24479	1.12681	-1.00681	0.195582	1.35427	0.377585
-62	-0.685352	0.0095281	-0.0672495	0.611645	-0.764691	-0.105994	0.0274622	0.397771	-1.45236	-1.23148	1.14592	-1.02597	0.3865	1.6944	0.0532258
-61	-0.687621	-0.114977	-0.0672495	0.611645	-0.780319	-0.105994	0.0274622	0.467167	-1.52667	-1.23148	1.39007	-1.07986	0.3865	1.6944	0.0532258
-60	-0.850785	-0.114977	0.0380039	0.529888	-0.868399	-0.427666	0.0401562	0.695188	-1.61168	-1.23148	1.39007	-1.07986	0.752948	1.50313	0.311262
-59	-0.902012	-0.114977	0.216087	0.467898	-0.905254	-0.629568	0.0401562	0.695188	-1.61168	-1.20753	1.37097	-1.07986	0.851389	1.15519	0.572583
-58	-0.917184	-0.528737	0.279255	0.324155	-0.905254	-0.629568	0.0401562	0.695188	-1.26118	-1.20753	1.19093	-1.11376	0.851389	1.13676	0.572583
-57	-0.944775	-0.528737	0.279255	0.308907	-0.844434	-1.07659	-0.312665	0.666305	-1.12049	-0.885709	1.10317	-1.11376	0.851389	1.13676	0.482706
-56	-1.23173	-0.515686	0.0769101	0.0941303	-0.519826	-1.17444	-0.448134	0.663275	-1.07267	-0.885709	0.546228	-0.974724	0.495613	0.728025	0.482706
-55	-1.23173	-0.417299	0.0769101	0.0941303	-0.519826	-1.17444	-0.448134	0.663275	-0.873544	-0.885709	0.546228	-0.884701	0.267984	0.70405	0.583817
-54	-1.0348	-0.277341	0.345636	0.311173	-1.11775	-1.17444	-0.469308	0.719014	-0.873544	-0.885709	0.546228	-0.876224	0.187268	0.53677	0.583817
-53	-1.0348	-0.298666	0.345636	0.311173	-1.11775	-1.08724	-0.469308	0.719014	-0.669126	-0.883064	0.34936	-0.623054	-0.0617364	0.53677	0.0249562
-52	-1.0348	-0.263188	0.247669	0.338787	-1.07535	-0.539278	-0.774127	0.413959	-0.669126	-0.808581	0.34936	-0.582527	-0.0617364	1.10498	-0.114206
-51	-1.0348	-0.298666	0.243588	0.478605	-0.87346	-0.539278	-0.774127	0.222939	-0.73811	-0.688903	0.374656	-0.623054	0.0557318	1.10498	-0.114206
-50	-0.848552	-0.288003	0.247669	0.478605	-0.655915	-0.510401	-0.678876	0.185456	-0.756746	-0.417588	0.482115	-0.856592	0.0557318	1.10498	0.0630301
-49	-0.668497	-0.288003	0.453249	0.495501	-0.645314	-0.544898	-0.500293	0.185456	-0.756746	-0.364396	0.676736	-0.856592	-0.175544	1.27226	0.0630301
-48	-0.205942	-0.288003	0.645957	0.45492	-0.645314	-0.544898	-0.190592	0.148452	-0.499187	-0.258011	0.676736	-0.391763	-0.212245	1.27226	0.0499767
-47	-0.205942	-0.436242	0.645957	0.45492	-0.645314	-0.608246	-0.190592	-0.0932273	-0.456605	-0.335147	0.387586	-0.391763	-0.175544	1.35762	-0.15625
-46	-0.244217	-0.436242	0.501814	0.435778	-0.430052	-0.736155	-0.2541	-0.0932273	-0.260168	-0.335147	0.387586	-0.912303	-0.048708	1.18255	-0.15625
-45	-0.244217	-0.104311	0.501814	0.395248	-0.430052	-0.736155	-0.2541	-0.0932273	-0.260168	-0.335147	0.449497	-0.953329	0.135157	1.04643	0.301522
-44	-0.244217	-0.104311	0.501814	0.377692	-0.562798	-0.736155	-0.2541	-0.631825	-0.531041	-0.335147	0.565351	-0.953329	0.135157	0.723027	0.321773
-43	-0.698309	-0.136308	0.177211	0.0084427	-0.562798	-0.728012	-0.498242	-0.631825	-1.03021	-0.335147	0.678989	-1.03043	-0.0273567	0.600911	0.489211
-42	-0.698309	-0.136308	0.124595	0.0084427	-0.780319	-0.728012	-0.610362	-0.395143	-1.03021	-0.875073	1.08349	-1.03043	-0.0273567	0.425252	0.566045
-41	-0.698309	0.0367498	0.177211	0.0428331	-0.884058	-0.613886	-0.610362	-0.395143	-0.546987	-0.875073	1.20161	-0.987639	-0.0273567	0.425252	0.566045
-40	-0.934086	0.0841856	0.177211	0.0428331	-1.16846	-0.627061	-0.556807	-0.440227	-0.546987	-0.694218	1.20161	-0.968447	-0.194558	0.590321	0.566045
-39	-0.934086	0.0841856	0.310844	0.130769	-1.25603	-0.627061	-0.556807	-0.440227	-0.608037	-0.622408	0.79881	-0.554887	-0.194558	0.946081	0.834605
-38	-0.692127	0.0996468	0.177211	0.255362	-1.25603	-0.696593	-0.604772	-0.387611	-0.637262	-0.622408	0.730185	-0.554887	-0.239613	0.946081	0.834605
-37	-0.631913	0.354533	0.048531	0.255362	-1.25603	-0.696593	-0.686637	-0.284253	-0.703642	-0.752723	0.462418	-0.882468	-0.390118	0.924315	0.935726
-36	-0.42818	0.354533	0.048531	0.159004	-1.22146	-0.555554	-0.686637	-0.180359	-1.06206	-0.752723	0.462418	-0.882468	-0.426796	0.924315	0.729522
-35	-0.405145	0.0604659	0.989388	-0.0558087	-0.924169	-0.555554	-0.413564	-0.164677	-1.14439	-0.516011	0.492799	-0.781742	-0.426796	0.924315	0.729522
-34	-0.340411	0.0106716	0.989388	-0.0558087	-0.764691	-0.555554	-0.413564	-0.0323761	-1.14439	-0.515973	0.492799	-0.665817	-0.345069	0.767632	0.219966
-33	-0.246472	0.0343779	0.841908	-0.0558087	-0.491359	-0.677823	-0.413564	0.0770205	-0.831077	-0.515973	0.329656	-0.665817	-0.162526	0.767632	0.196383
-32	-0.317354	0.0343779	0.841908	0	-0.491359	-0.68035	-0.323249	0.0770205	-0.597419	-0.505339	0.29983	-0.484036	-0.162526	0.844588	-0.215312
-31	-0.317354	0.0343779	0.841908	0.0282651	-0.703353	-0.68035	-0.31475	0.135279	-0.597419	-0.0904387	0.190701	-0.477298	-0.145832	0.850142	-0.215312
-30	-0.938574	0.235919	0.54068	0.1629	-0.703353	-0.608246	-0.232932	0.0532177	-0.841694	-0.0904387	0.0320667	-0.188039	0.116142	0.850142	-0.14574
-29	-0.938574	0.203912	0.383645	0.238514	-0.780319	-0.502273	-0.232932	0.0532177	-0.841694	-0.0159502	-0.15862	-0.188039	0.116142	0.626645	0.0322035
-28	-0.89132	0.203912	0.54068	0.465628	-0.780319	-0.345508	-0.10803	-0.082047	-0.62664	-0.199492	-0.15862	-0.451947	-0.0557318	0.345525	0.0322035
-27	-0.89132	0.09247	0.631338	0.549689	-0.780319	-0.233891	-0.103092	-0.082047	-0.62664	-0.199492	-0.11138	-0.608379	-0.0557318	0.345525	-0.0130963
-26	-1.12258	0.09247	0.676668	0.704134	-0.613506	-0.233891	-0.103092	0.0482127	-0.775318	-0.513358	-0.11138	-0.730495	-0.214562	0.629887	-0.0728872
-25	-1.1417	0.09247	0.676668	0.721	-0.493642	-0.334851	0.149537	0.14592	-0.870915	-0.513358	-0.11138	-0.730495	-0.214562	0.73584	-0.0728872
-24	-1.1417	0.222879	0.620813	0.721	-0.360897	-0.334851	0.364038	0.294936	-0.870915	-0.457501	0.111381	-0.931932	-0.522941	0.73584	-0.131969
-23	-1.09668	0.212208	0.620813	0.646041	-0.493642	-0.34238	0.355638	0.294936	-0.796552	-0.353759	0.111381	-0.931932	-0.564221	0.73584	-0.131969
-22	-0.728097	0.212208	0.620813	0.646041	-0.430052	-0.353631	0.355638	0.276154	-0.443425	-0.353759	0.225021	-0.700613	-0.522941	0.680079	-0.121459
-21	-0.728097	-0.117364	0.63864	0.646041	-0.430052	-0.448984	-0.288675	-0.0156686	-0.443425	-0.590493	0.225021	-0.638239	-0.313024	0.653349	-0.118192
-20	-0.803539	-0.117364	0.603842	0.64377	-0.430052	-0.549937	-0.288675	-0.0476047	-0.443425	-0.590493	0.405053	-0.55267	-0.313024	0.528479	-0.121459
-19	-0.807455	-0.0461939	0.603842	0.571098	-0.653146	-0.549937	-0.185616	-0.0638491	-0.318613	-0.40694	0.405053	-0.55267	-0.339012	0.528479	0.203652
-18	-0.854742	-0.0461939	0.543909	0.555833	-0.695983	-0.999475	-0.185616	-0.0638491	-0.318613	0.114389	0.405053	-0.635997	-0.677123	0.685151	0.359834
-17	-1.14	-0.0461939	0.484826	0.36926	-0.695983	-0.821401	-0.0974482	-0.167201	-0.5045	0.274018	0.473707	-0.738964	-0.677123	0.685151	0.359834
-16	-1.14	-0.0189713	0.412017	0.36926	-0.804779	-0.842124	-0.320427	-0.0394616	-0.5045	0.274018	0.617146	-0.738964	-0.754212	0.379675	0.352606
-15	-0.9791	0.192186	0.0453212	0.442663	-0.82323	-0.821401	-0.320427	-0.0131598	-0.469915	0.0186235	0.640792	-0.989396	-0.754212	0.379675	0.27322
-14	-0.9791	0.192186	-0.03479	0.442663	-0.82323	-0.842124	-0.556807	0.0507107	-0.469915	0.0186235	0.617146	-0.989396	-0.77323	0.387553	0.27322
-13	-1.06068	0.0201926	-0.12223	0.442663	-0.725048	-1.12427	-0.556807	0.0532177	-0.531041	0.0664973	0.373002	-0.989396	-0.812268	0.387553	0.325037
-12	-1.0753	0.0095281	-0.290658	0.626911	-0.725048	-1.12427	-0.541243	0.0532177	-0.700987	0.0664973	0.373002	-1.1931	-0.897709	0.533606	0.575867
-11	-1.0753	0.0095281	-0.290658	0.743139	-0.613506	-0.265251	-0.0501555	0.183469	-0.985065	-0.0106394	0.569864	-1.26173	-0.913042	0.533606	0.575867
-10	-0.867688	0.0095281	-0.199138	0.970212	-0.613506	-0.223235	-0.0501555	0.183469	-0.985065	-0.0106394	0.569864	-1.36867	-1.15732	0.533606	0.332284
-9	-0.867688	-0.295192	-0.0210585	0.970212	-0.493642	-0.148632	-0.0847203	0.13589	-1.01429	-0.0106394	0.287549	-1.26173	-1.15732	0.520633	0.332284
-8	-0.867688	-0.353288	-0.139148	0.639908	-0.358608	-0.148632	-0.0847203	0.100827	-1.09658	-0.194138	0.287549	-0.903856	-0.961775	0.520633	0.496466
-7	-0.811983	-0.353288	-0.0210585	0.639908	-0.355848	-0.148632	-0.188407	0.00312924	-1.09658	-0.547934	0.34936	-0.820516	-0.756539	0.77823	0.496466
-6	-0.557083	-0.0723115	0.283394	0.639908	0.0267488	-0.0745837	-0.188407	0.00312924	-0.894805	-0.547934	0.614871	-0.820516	-0.730519	0.796668	0.293512
-5	-0.303788	-0.0723115	0.283394	0.320334	0.0345719	-0.021311	-0.188407	0.180973	-0.546987	-0.47878	0.632402	-0.762586	-0.677123	0.77823	0.244266
-4	-0.158688	-0.0723115	-0.0084979	0.169709	0.153959	0.173045	-0.164437	0.180973	-0.390329	-0.273952	0.627828	-0.634205	-0.390118	0.634512	0.0912774
-3	-0.158688	-0.11258	-0.194996	0.169709	0.153959	0.18062	-0.164437	0.337524	-0.2947	-0.034579	0.627828	-0.608379	-0.247936	0.347864	0.0912774
-2	-0.158688	0.0580877	-0.194996	0.169709	-0.0267228	0.205025	0.0027895	0.271143	-0.268187	-0.034579	0.453967	-0.291031	-0.196902	0.347864	0.290243
-1	-0.117569	0	0	0.0840765	-0.0267228	0.205025	0	0.271143	-0.217705	0	0.445529	0	-0.196902	0.347864	0.290243
0	-0.117569	0	0.107603	0.0626725	-0.0396261	0	0	0.262999	-0.108857	0	0	0	-0.196902	0.435431	0.115565
1	0	-0.0853595	0.107603	0.0626725	0	-0.161801	0	0.262999	-0.108857	0.0984174	-0.0708586	-0.162695	-0.351079	0.435431	0.115565
2	0.0343314	-0.0853595	0.401488	0.453364	-0.0396261	-0.292222	0.0451505	0.262999	-0.339847	0.210135	-0.0708586	-0.674786	-0.374777	0.488456	0.115565
3	0.0343314	-0.0853595	0.401488	0.547402	-0.106001	-0.521056	0.0825083	-0.0288141	-0.416873	0.327196	-0.0708586	-0.751889	-0.716121	0.693005	-0.174004
4	-0.143488	-0.160032	-0.297944	0.547402	-0.106001	-0.674712	0.0825083	-0.0288141	-0.430136	0.210135	-0.0618571	-0.751889	-0.964117	0.759366	-0.174004
5	-0.143488	-0.160032	-0.297944	0.547402	-0.334644	-0.674712	0.0825083	0.146539	-0.430136	-0.0106394	0.0169051	-0.799119	-0.964117	0.81787	0.240978
6	0.0191295	0.0415224	-0.174873	0.938095	-0.334644	-0.178083	-0.0105911	0.28429	-0.302706	-0.0106394	0.0343162	-0.648933	-0.945086	0.81787	0.240978
7	0.0191295	0.118576	-0.136856	0.938095	-0.483507	-0.0821655	-0.0953096	0.340024	-0.302706	0.0931156	0.0343162	-0.616848	-0.945086	0.987905	0.240978
8	0.0816241	0.118576	-0.136856	0.938095	-0.518066	-0.0821655	-0.0953096	0.340024	-0.302706	0.0931156	-0.203617	-0.501387	-0.945086	0.987905	0.565361
9	0.00682354	0.257259	-0.237125	1.10554	-0.483507	-0.0821655	-0.0741327	0.400788	-0.100904	-0.135655	-0.239614	-0.501387	-0.79552	0.775467	0.743997
10	-0.125969	0.420921	-0.237125	1.12084	-0.390417	0.143588	-0.0741327	0.400788	-0.0530943	-0.204772	-0.239614	-0.501387	-0.79552	0.709108	0.813586
11	-0.125969	0.474246	-0.132759	1.12084	-0.348004	0.143588	-0.0741327	0.400788	0.00534743	-0.135655	0.57604	-0.391763	-0.79552	0.651075	0.813586
12	-0.125969	0.668651	-0.132759	0.809655	-0.114309	-0.103991	-0.0211823	0.366338	0.130106	-0.117009	0.57604	-0.248258	-0.606967	0.639994	0.545024
13	-0.366324	0.668651	-0.276045	0.607799	0.0133708	-0.204439	-0.0155872	0.366338	0.130106	0.319247	0.297584	-0.248258	-0.606967	0.406364	0.545024
14	-0.366324	0.355663	-0.276045	0.249217	0.552233	-0.204439	-0.0155872	0.393257	0.130106	0.500166	0.297584	-0.248258	-0.527568	0.406364	0.841155
15	-0.381518	0.248966	-0.276045	0.249217	0.552233	-0.175549	0.0211841	0.393257	0.252252	0.478796	0.411213	-0.203239	-0.681761	0.486075	0.841155
16	-0.381518	0.15886	-0.297101	0.39755	0.387663	0.210055	0.0881302	0.393257	0.252252	0.478796	0.437105	-0.203239	-0.443522	0.486075	0.841155
17	-0.679188	-0.0106716	-0.297101	0.637617	0.387663	0.263345	0.0881302	0.433366	0.0557622	0.337831	0.462418	-0.203239	-0.580988	0.486075	0.799811
18	-0.679188	-0.0106716	-0.541554	0.646041	0.387663	0.348625	0.0881302	0.433366	0.0557622	0.337831	0.462418	-0.229104	-0.580988	0.507276	0.799811
19	-0.599845	-0.0106716	-0.632195	0.646041	0.480783	0.356173	0.180607	0.401416	0.286771	0.444215	0.492799	-0.229104	-0.641321	0.554818	0.748012
20	-0.599845	-0.436242	-0.652305	0.347849	0.480783	0.515491	0.220188	0.401416	0.634637	0.444215	0.415737	-0.229104	-1.09091	0.685151	0.748012
21	-0.760767	-0.589195	-0.652305	0.0535423	0.539344	0.515491	0.339493	0.626841	0.679784	0.236746	0.492799	0.00667691	-1.09091	0.685151	0.748012
22	-0.760767	-0.648456	-0.652305	0.038968	0.629218	0.199398	0.339493	0.801589	0.820508	0.220776	0.495073	0.00667691	-1.13595	0.300365	0.527276
23	-0.552561	-0.589195	-0.499441	0.0535423	0.706204	0.199398	0.339493	1.02514	0.979852	0.164917	0.495073	-0.638239	-1.15732	0.300365	0.527276
24	-0.122108	-0.2869	-0.139148	0.0756794	0.706204	0.199398	0.34784	1.02514	1.03029	0.10108	0.310518	-0.638239	-1.3314	0.252446	0.634977
25	-0.122108	-0.2869	0.00733405	0.0756794	0.478011	0.178086	0.531278	0.73521	0.979852	0.10108	0.105219	-0.413574	-1.3314	0.252446	0.691448
26	-0.419768	-0.340244	-0.0517002	-0.0405425	0.143356	-0.0370163	0.602587	0.73521	0.334578	0.10108	0.105219	-0.413574	-1.09322	0.135447	0.942282
27	-0.419768	-0.340244	-0.0517002	-0.0405425	-0.0376457	-0.0370163	0.777622	0.958163	0.334578	0.242116	0.0708962	-0.514289	-0.83363	0.130333	0.942282
28	-0.124364	-0.340244	-0.416111	0.0603747	-0.0376457	0.262834	0.793802	0.958163	0.41954	0.242116	-0.289135	-0.514289	-0.684066	0.135447	0.858247
29	-0.124364	-0.374626	-0.416111	0.0603747	0.291824	0.262834	0.793802	0.43585	0.41954	0.391145	-0.289135	-0.263421	-0.684066	0.255206	0.743997
30	-0.244217	-0.374626	-0.119022	0.0603747	0.382158	0.205025	1.15725	0.43585	0.41954	0.500166	-0.195154	-0.263421	-0.591671	0.326657	0.719016
31	-0.303788	-0.340244	-0.0558501	-0.107058	0.382158	0.205025	1.15725	0.43585	0.339881	0.500166	0.0343162	-0.364422	-0.630635	0.45664	0.719016
32	-0.244217	-0.161182	-0.0558501	-0.107058	-0.0691393	0.316642	1.13887	0.356333	0.339881	0.720924	0.171052	-0.629774	-0.630635	0.496675	0.719016
33	-0.154177	-0.0699216	-0.0663796	-0.16897	-0.0691393	0.316642	1.08535	0.292439	0.339881	0.720924	0.171052	-0.629774	-1.14285	0.878749	0.733487
34	0.119855	0.233551	-0.0947526	-0.173572	-0.0534198	0.207535	1.08535	0.292439	0.584177	0.720924	0.0258887	-0.100721	-1.14285	0.878749	0.733487
35	0.119855	0.233551	-0.146489	-0.173572	0.310682	0.207535	0.706292	0.366983	0.584177	0.760776	0.0258887	-0.100721	-1.10761	0.706353	0.667934
36	0.119855	0.272686	-0.104364	-0.173572	0.310682	0.6515	0.706292	0.366983	0.414249	0.760776	0.205355	-0.325357	-1.10761	0.706353	0.659921
37	-0.147995	0.0759155	-0.104364	0.206404	0.305172	0.723011	0.759233	0.366983	0.339881	0.534657	0.205355	-0.325357	-1.34586	0.706353	0.659921
38	-0.0534457	0.0759155	0.178082	0.530581	0.305172	0.933077	0.759233	0.318732	0.339881	0.449554	0.297584	-0.437175	-1.34586	0.313316	0.638906
39	-0.0534457	0.0759155	0.178082	0.536696	0.7565	0.933077	0.759233	0.300601	-0.175227	0.449554	0.280713	-0.512087	-1.19537	0.313316	0.520051
40	0.0106904	0.137523	-0.12955	0.530581	0.7565	0.933077	0.82557	0.300601	-0.175227	0.449554	0.297584	-0.574064	-0.522941	0.631785	0.464236
41	0.0106904	0.137523	-0.12955	0.478605	0.650428	0.948801	0.82557	0.231743	0.0531015	0.39102	0.370728	-0.743411	-0.430508	0.698508	0.520051
42	-0.522758	0.270302	-0.0453203	0.395248	0.538581	1.00208	0.807198	0.231743	0.066433	0.39102	0.370728	-0.816064	-0.371067	0.698508	0.575867
43	-0.522758	0.368701	-0.0453203	0.268344	0.536135	1.00208	0.807198	0.0219449	0.0690606	-0.0717831	0.225021	-0.816064	-0.212245	0.772713	0.575867
44	-0.518787	0.368701	-0.0769088	0.268344	0.249398	0.885403	0.785435	-0.169715	0.167288	-0.284588	0.225021	-0.520576	0.100784	0.775467	0.575867
45	-0.509808	0.171909	-0.0769088	0.504581	0.0687325	0.885403	0.798807	-0.352552	0.167288	-0.284588	0.318965	-0.456379	0.100784	0.775467	0.540459
46	-0.50809	0.171909	-0.0769088	0.69343	0.00480473	0.885403	0.798807	-0.352552	0.430161	-0.220638	0.318965	-0.282945	-0.0153199	1.30635	0.506262
47	-0.47774	0.299942	-0.268718	0.69343	0.00480473	0.714892	0.798807	-0.25738	0.565588	-0.10905	0.077067	-0.282945	-0.154186	1.30635	0.506262
48	-0.328049	0.429188	-0.268718	0.431963	0.13785	0.539879	0.467126	0.202271	0.647922	0.109059	-0.209818	0.0151375	-0.0854364	1.24785	0.695442
49	-0.124364	0.58092	-0.279248	0.431963	0.161502	0.284662	0.467126	0.202271	0.764743	0.540007	-0.293611	0.0579277	-0.158831	1.07823	0.695442
50	0.342696	0.58092	-0.279248	0.431963	0.233319	0.284662	0.467126	0.197316	0.894865	0.877803	-0.477576	0.0151375	-0.158831	1.02755	0.639629
51	0.342696	0.317742	-0.496232	-0.0084284	0.241208	0.212585	0.562461	0.197316	0.894865	0.904416	-0.477576	0.041002	-0.400799	1.0091	0.549032
52	0.126071	0.317742	-0.582742	-0.0129756	0.241208	-0.116654	0.827814	0.362044	0.775447	0.877803	-0.407206	-0.0191805	-0.400799	0.934506	0.639629
53	0.126071	0.317742	-0.582742	-0.0129756	0.198766	-0.116654	0.827814	0.579265	0.626672	0.790021	-0.302067	0.041002	-0.321381	0.75663	0.549032
54	0.126071	-0.0035343	-0.505831	0.191121	-0.0164214	-0.0395264	0.562461	0.592403	0.379739	0.790021	-0.302067	0.141737	-0.321381	0.714212	0.321773
55	0.0900418	-0.011799	-0.264557	0.253098	-0.196785	0.0344986	0.562461	0.677599	0.252349	0.800754	-0.413443	0.276347	-0.347388	0.695752	0.321773
56	-0.0129461	-0.0984022	-0.247656	0.191121	-0.204955	0.0344986	0.812185	0.677599	0.143447	0.968351	-0.432576	0.283007	-0.347388	0.499063	0.338818
57	-0.0579634	-0.106696	-0.20871	0.0642514	-0.204955	-0.151141	0.812185	0.619394	0.103571	0.800754	-0.432576	0.276347	-0.21591	0.499063	0.747262
58	-0.135055	-0.106696	-0.20871	-0.285192	-0.0191242	-0.151141	0.812185	0.592403	0.103571	0.683641	-0.336374	0.302173	-0.100782	0.81787	0.875959
59	-0.353371	0.0154129	0.0874404	-0.324142	0.0102317	-0.117196	0.692899	0.371962	0.143447	0.367075	-0.336374	0.516561	-0.100782	0.81787	0.89042
60	-0.30218	0.131638	0.154811	-0.712524	0.0102317	0.100964	0.830585	0.371962	0.143447	0.367075	-0.336374	0.516561	-0.100782	0.552433	1.05063
61	-0.30218	0.131638	0.227545	-0.712524	0.0102317	0.100964	1.02738	0.425202	0.00796169	0.372421	-0.511887	0.516561	-0.0580537	0.552433	1.12819
62	0.0984728	0.29164	0.227545	-0.412074	-0.0506803	0.141068	1.19462	0.504725	-0.233613	0.375109	-0.25084	0.212146	-0.135149	0.395762	1.12819
63	0.0984728	0.29164	0.097971	-0.412074	-0.0506803	0.104071	1.37246	0.504725	-0.233613	0.627778	-0.15638	-0.0619671	-0.135149	0.592095	0.942973
64	-0.0297984	0.29164	-0.0517002	-0.613886	0.0366452	0.104071	1.37246	0.807897	-0.0132814	0.627778	-0.15638	-0.0619671	-0.167195	0.679664	0.92273
65	-0.188508	0.793144	-0.181276	-0.613886	0.0366452	-0.0953338	1.37246	0.876753	0.276222	0.627778	-0.132755	-0.192545	-0.167195	0.679664	0.90093
66	-0.238024	0.92593	-0.170745	-0.613886	-0.30045	-0.0953338	1.22359	0.876753	0.337238	0.768743	-0.132755	-0.254941	-0.167195	0.679664	0.667162
67	-0.570024	0.941375	-0.170745	-0.600911	-0.30588	0.52922	1.22359	0.513673	0.385127	0.768743	0.0877565	-0.422071	-0.233607	0.88423	0.629933
68	-0.570024	0.941375	-0.170745	-0.733938	-0.313781	0.52922	1.08813	0.467799	0.900219	0.824604	0.0877565	-0.422071	-0.265649	0.88423	0.259463
69	-0.570024	0.819258	-0.484766	-0.80498	-0.778431	0.470904	1.2314	0.467799	0.900219	0.821941	-0.049476	-0.263421	-0.270292	0.878749	0.186677
70	-0.750072	0.819258	-0.484766	-0.80498	-0.778431	0.470904	1.27436	0.773471	0.894865	0.821941	-0.049476	0.0214005	-0.329723	0.554818	0.186677
71	-0.750072	1.04216	-0.156034	-0.712524	-0.80237	0.544919	1.4254	0.961254	0.809951	0.821941	0.147958	0.0214005	-0.329723	0.554818	0.186677
72	-0.537945	1.07897	-0.0379832	-0.358533	-0.783859	0.66216	1.4254	0.961254	0.809951	0.85919	0.147958	0.216598	-0.177876	0.554818	0.109036
73	-0.411809	1.07897	0.140097	-0.358533	-0.783859	0.66216	1.28214	0.82102	0.71695	0.85919	0.147958	0.424298	0.0450513	0.512396	0.0952738
74	-0.405145	1.07897	-0.0379832	-0.388387	-0.783859	0.512951	1.24199	0.725168	0.71695	0.723624	0.130515	0.216598	0.0450513	0.512396	0.0952738
75	-0.366324	1.40374	-0.152862	-0.425049	-1.04146	0.512951	1.24199	0.671929	0.682435	0.712879	0.261043	0.18005	-0.0236875	0.666329	0.0952738
76	-0.212146	1.40374	-0.152862	-0.611618	-1.04146	0.284662	1.21021	0.650635	0.682435	0.641098	-0.122067	0.18005	-0.254969	0.77823	0.189903
77	-0.11815	1.43813	0.00733405	-0.611618	-0.892836	0.284662	1.02683	0.446499	0.414249	0.712879	-0.152378	0.205902	-0.254969	0.870881	0.161598
78	-0.11815	1.23067	0.0115075	-0.500003	-0.892836	0.0106564	1.02683	0.446499	0.334605	0.787421	-0.214309	0.205902	-0.21687	0.870881	0.189903
79	-0.11815	1.18561	0.132761	-0.500003	-0.895391	0.0106564	0.819992	0.330083	0.273609	0.81664	-0.214309	0.00667691	-0.21687	0.95845	0.210935
80	-0.344944	1.035	0.132761	-0.500003	-0.919317	0.361791	0.819992	0.330083	0.191206	0.821941	-0.214309	0.00444084	-0.158831	1.15754	0.500501
81	-0.344944	1.01604	0.00414815	-0.525953	-0.895391	0.396281	1.08535	0.144058	0.148859	0.941688	-0.257068	0.00444084	-0.158831	1.32247	0.545024
82	-0.107454	0.551301	-0.201345	-0.525953	-0.889967	0.396281	1.14109	0.144058	0.108945	1.2396	-0.257068	-0.036099	-0.158831	1.32247	0.660657
83	0.0427633	0.551301	-0.201345	-0.525953	-0.643181	0.250173	1.14109	0.467799	0.108945	1.41529	-0.25084	-0.0664106	-0.167195	1.19996	0.722976
84	0.293196	0.551301	0.0778909	-0.491564	-0.643181	0.173045	1.36913	0.467799	0.108945	1.45512	-0.25084	-0.0664106	-0.167195	1.09391	0.722976
85	0.293196	0.328408	0.0915986	-0.229382	-0.643181	0.173045	1.36913	0.467799	0.0876886	1.48434	-0.282918	0.0989664	-0.0961152	1.09391	0.722976
86	0.0213808	0.328408	0.0915986	-0.229382	-0.664411	0.29479	1.28993	0.491584	-0.0025713	1.48434	-0.282918	0.0989664	0.0297269	0.698148	0.858892
87	0.0213808	0.326024	0.017866	-0.366974	-0.550177	0.351131	1.28437	0.568615	-0.0025713	0.845987	0.077067	-0.0169507	0.0473866	0.563034	0.858892
88	0.0855312	0.497974	0.017866	-0.478589	-0.348328	0.353647	1.28437	0.491584	-0.0185743	0.803327	0.102952	-0.0169507	0.0473866	0.629393	0.743997
89	0.334264	0.497974	0.242269	-0.57265	-0.348328	0.449025	1.39083	0.417775	-0.114087	0.766155	0.286894	0.285247	0.0640914	0.613303	0.743997
90	0.443426	0.497974	0.242269	-0.57265	-0.348328	0.638332	1.39083	0.417775	-0.0185743	0.803327	0.405053	0.516561	0.308385	0.629393	0.76828
91	0.398406	0.30231	0.406655	-0.54054	-0.342884	0.78136	1.46278	0.908023	-0.0239021	1.05073	0.405053	0.516561	0.308385	0.762111	0.87991
92	0.443426	0.30231	0.412983	-0.54054	-0.335001	1.03658	1.46278	0.919363	0.0345531	1.06675	0.541728	0.358431	0.0557318	0.788829	0.946235
93	0.623514	0.464744	0.443607	-0.54054	-0.0800899	1.09548	1.81787	1.07023	0.645289	1.20501	0.848334	0.358431	0.0557318	0.908185	0.998788
94	0.78839	0.511043	0.699598	-0.476314	-0.0800899	1.14821	1.81787	0.964444	0.645289	1.10392	0.907953	0.424298	0.250343	0.908185	0.998788
95	0.78839	0.602259	0.810314	-0.476314	-0.0800899	1.14821	1.69637	1.07023	0.863097	1.10392	1.04072	0.589721	0.411493	0.762598	1.55369
96	0.518272	0.615306	0.870322	-0.574941	-0.345611	1.09239	1.67182	1.26195	0.889592	1.10392	1.04072	0.598154	0.527643	0.67455	1.55369
97	0.492986	0.615306	0.956814	-0.574941	-0.579297	1.09239	1.61885	1.3095	0.902849	1.51625	0.760587	0.598154	0.591711	0.67455	1.29563
98	0.480022	0.615306	0.992561	-0.574941	-0.579297	1.09239	1.67182	1.45293	1.11002	1.53225	0.760587	0.718033	0.591711	0.903121	1.21808
99	0.480022	0.819258	0.992561	-0.484731	-0.420115	1.0792	1.85243	1.3095	1.09677	1.56685	0.713308	1.0034	0.355759	0.995748	0.974509
100	0.841847	0.866725	0.611164	-0.484731	-0.420115	1.0792	1.85243	1.45293	1.09677	1.56685	0.614871	1.0439	0.355759	0.995748	0.817581
101	0.841847	0.938982	0.461478	-0.216385	-0.425319	1.20149	1.83124	1.46606	0.993125	1.56685	0.614871	1.2347	0.675861	0.956108	0.695442
102	0.899816	0.866725	0.451965	-0.0573465	-0.425319	1.20149	1.83124	1.46606	0.993125	1.51098	0.614871	1.25835	0.713862	0.623907	0.695442
103	1.03489	0.938982	0.360311	0.159004	-0.395918	1.30246	2.12563	1.46606	0.926737	1.40195	0.717852	1.2347	0.894096	0.623907	0.695442
104	1.25163	0.986436	0.360311	0.159004	-0.361648	1.34509	2.12617	1.59316	0.602785	1.29279	0.717852	1.21332	0.894096	0.722471	0.918695
105	1.47608	1.09789	0.689061	0.0993928	-0.395918	1.36593	2.14735	1.59316	0.602785	1.29279	0.717852	0.947683	0.838358	1.34644	0.918695
106	1.44627	1.17735	0.74393	-0.149871	-0.39619	1.36593	2.4523	1.63575	0.953361	1.65211	0.546228	0.870014	0.647447	1.38101	0.820143
107	1.44627	1.17735	0.74393	-0.315003	-0.39619	1.33696	2.51363	1.63575	0.953361	1.65211	0.546228	0.709588	0.602391	1.50591	0.820143
108	1.25163	1.17735	0.760876	-0.315003	-0.521033	1.33696	2.54262	1.63575	0.889592	1.90477	0.621044	0.709588	0.602391	1.50591	0.827367
109	1.24479	0.87259	0.943083	-0.237789	-0.521033	1.54703	2.54262	1.85374	0.889592	1.81954	0.758316	0.934722	0.703183	1.50591	0.827367
110	1.17225	0.87259	0.992561	-0.237789	-0.521033	1.54703	2.54262	1.92759	1.00905	1.87809	0.814011	0.952254	0.775619	1.59127	0.827367
111	1.17225	0.790767	1.09055	-0.214081	0.262432	1.52319	2.58278	1.92759	1.00905	1.81954	0.987269	0.952254	0.994894	1.49532	0.932462
112	1.17225	0.790767	1.09055	-0.214081	0.472496	1.41109	2.99645	1.74474	0.759447	1.87809	0.987269	1.33773	1.08502	1.49532	0.977766
113	1.19977	1.10855	1.11163	-0.214081	0.496131	1.41109	3.08177	1.74474	0.71431	1.88079	1.0109	1.33773	1.10873	1.49532	1.10645
114	1.19977	1.27814	1.41514	-0.336405	0.613125	1.39532	3.08177	2.19065	0.722305	2.09094	1.44351	1.33773	1.12177	1.65482	0.977766
115	1.24479	1.37894	1.41514	-0.336405	0.613125	1.21978	2.83979	2.35044	0.722305	2.25334	1.6243	1.40186	1.12177	1.9649	1.01911
116	1.44175	1.37894	1.46045	-0.243865	0.711334	1.21978	2.63294	2.3611	1.04625	2.4341	1.67083	1.60566	1.55826	1.9649	1.01911
117	1.46314	1.37894	1.46045	-0.149871	0.767109	1.40853	2.4523	2.3611	1.19494	2.50873	1.93024	1.74462	1.58076	1.9649	1.24307
118	1.51268	1.6421	1.55845	0.0756794	0.767109	1.62416	2.4523	2.24889	1.19494	2.54584	1.98366	1.87745	1.58076	2.10039	1.35073
119	1.51268	1.6421	1.91049	0.367765	0.573442	1.82056	2.57718	2.24889	0.942732	2.70824	2.10196	1.87745	1.58076	2.10039	1.55695
120	1.50591	1.59362	2.0222	0.367765	0.573442	1.82056	2.76563	2.24889	0.870973	2.70824	2.10196	1.83924	1.49419	2.0368	1.55695
121	0.957796	1.59362	2.18246	0.367765	0.671639	1.63694	2.76563	2.23262	0.870973	2.73472	1.915	1.77896	1.6958	2.00501	1.92994
122	0.957796	1.87328	2.22872	0.367765	0.671639	1.63694	2.70987	2.23262	0.955943	2.59921	1.7479	1.52173	1.69816	2.00501	2.16703
123	1.08219	2.22557	2.19712	0.200322	0.671639	2.00422	2.67531	2.24639	1.03563	2.59921	1.69906	1.52173	1.69816	2.0368	2.16703
124	1.08219	2.35594	2.19712	0.182702	0.700725	2.00422	2.67531	2.37352	1.25605	2.46621	1.7479	1.99573	1.71951	2.24427	2.08034
125	1.07765	2.35594	2.15087	0.155206	0.828362	1.75711	2.67531	2.42178	1.25605	2.4687	1.79291	1.99573	1.71951	2.25432	2.08034
126	0.981447	2.38211	2.0918	0.155206	0.828362	1.75711	2.74444	2.78818	1.25605	2.4687	1.79291	1.61025	1.71951	2.28664	1.91615
127	0.981447	2.38211	2.06851	0.155206	0.99021	2.08135	2.74444	2.78818	1.40473	2.51935	1.74338	1.61025	1.73019	2.38479	1.91615
128	1.57457	2.56485	1.81251	0.687324	1.04363	2.08135	2.74444	2.71114	1.40473	2.79872	1.67311	1.33163	1.99586	2.44335	1.91615
129	1.57457	2.56485	1.81251	0.715688	1.1045	2.04685	2.58222	2.71114	1.37286	2.79872	1.67311	1.23926	2.16546	2.7702	2.08759
130	1.08834	2.43541	1.85985	0.798954	1.04363	1.99867	2.46796	2.75127	1.37286	2.796	1.67311	1.23926	2.16546	2.7702	2.45404
131	1.08834	2.43541	2.02319	1.02454	0.775339	2.04685	2.46796	2.75127	1.50037	2.77996	1.78451	1.47897	2.15006	3.00605	2.45404
132	1.08834	2.43541	2.24345	1.02454	0.775339	1.99867	2.36477	2.75623	1.53219	2.77996	1.78451	1.96978	2.15006	3.00605	2.23402
133	0.921198	2.11168	2.24345	0.724056	1.32761	1.96972	2.36477	2.66853	1.63045	2.77996	1.78451	2.15222	2.15006	2.96869	2.19464
134	0.906007	2.11168	2.1834	0.620808	1.32761	1.81546	2.36477	2.34474	1.72606	2.73222	1.70974	2.15222	2.2212	2.96869	2.19464
135	0.696098	2.20182	2.1834	0.620808	1.24514	1.81546	2.53762	2.2013	1.8668	2.73222	1.70974	2.38811	2.2212	2.96869	2.19464
136	0.680931	2.27888	2.1834	0.458	1.15518	1.81546	2.53762	2.08734	1.87211	2.87586	1.91273	2.38811	2.2212	2.74059	2.25831
137	0.676965	2.27888	1.66699	0.458	1.24514	1.74601	2.53762	2.08734	1.87211	2.87586	1.91273	2.82477	2.26865	2.71443	2.66944
138	0.610562	2.27888	1.37619	0.676623	1.61711	1.74601	2.61736	2.21695	1.58796	2.60441	1.91273	2.82477	2.26865	2.65089	2.73642
139	0.676965	2.57551	1.37619	0.795237	1.61711	1.85508	2.61736	2.67422	1.58268	2.57251	2.02412	2.42856	2.82852	2.65089	2.73642
140	0.981447	2.57551	1.64591	1.20269	1.55042	1.95095	2.75503	2.67422	1.58268	2.60441	2.02412	2.42856	2.86881	2.74059	2.62805
141	1.03489	2.32153	1.64591	1.20269	1.52677	2.5198	2.92229	2.69553	1.64641	2.95572	1.89135	2.42856	3.0313	2.74059	2.62805
142	1.1418	2.32153	1.6006	1.27154	1.52677	2.55432	3.04161	2.74062	2.20672	3.00887	1.89135	2.41179	3.0313	2.48853	3.03329
143	1.18066	2.7674	1.6006	1.24318	1.52677	2.60504	3.04161	3.02429	2.20672	3.07295	1.89591	2.37512	2.96487	2.48853	3.03329
144	1.46089	2.7674	1.65962	1.24318	1.07268	2.91312	3.04161	3.02429	2.18283	3.39485	2.06761	2.37512	2.96487	2.68482	3.08844
145	1.46089	2.38454	1.65962	1.01851	1.07268	2.91312	2.86881	2.87095	2.09791	3.44253	2.25148	2.73781	2.96487	2.80197	3.45434
146	1.06696	2.33461	1.5205	1.01851	1.15242	2.33359	2.86881	2.57094	1.98365	3.44253	2.27285	2.73781	2.47858	2.87892	3.45434
147	1.06696	2.24206	1.5205	1.38552	1.16303	2.24628	3.00704	2.57094	1.93324	3.01433	2.31178	2.75454	2.47858	3.23756	3.45434
148	1.06696	2.24206	1.78292	1.47813	1.16303	2.24628	3.00704	2.47504	1.92801	2.93995	2.31178	2.83395	2.76692	3.23756	3.25535
149	0.687656	2.66659	1.92519	1.47813	1.21332	2.24628	3.01542	2.47504	1.93324	2.79872	2.28125	3.06756	2.86293	3.23756	2.96958
150	0.687656	2.66659	2.07588	1.47813	1.21332	2.16357	2.96746	2.46687	1.8881	2.71096	2.16373	3.06756	2.86293	3.25593	2.96958
151	0.769277	2.44272	1.92519	1.54464	1.24002	2.10775	2.96746	2.40865	2.02083	2.70282	2.16373	3.03551	3.03018	3.39147	3.41289
152	0.904358	2.20766	1.71653	1.54464	1.24002	2.10775	2.96746	2.46687	2.02083	2.70282	2.38654	3.03551	3.03018	3.39147	3.41289
153	1.14632	2.19358	1.51631	1.54464	1.28244	2.10775	2.96746	2.62344	2.18019	2.72432	2.38654	2.95378	3.03018	3.61674	3.66772
154	1.14632	2.20766	1.44042	1.25484	1.52167	2.00677	2.87214	2.72677	2.18019	2.80664	2.38654	2.95378	3.56743	3.61674	3.6224
155	1.09288	2.49115	1.44042	1.23582	1.55859	2.00677	2.62514	2.73244	2.32092	2.80664	2.67805	2.89805	3.57462	3.64073	3.6224
156	1.03489	2.49115	1.51313	1.02921	1.55859	2.00677	2.61678	2.90215	2.28374	2.7614	2.81463	2.86753	3.62797	3.79746	3.6224
157	0.947109	2.27888	1.64591	1.02921	1.73653	2.0839	2.31181	2.90215	2.30764	2.7614	2.97563	2.74994	3.75255	3.79746	3.90154
158	0.872299	2.17567	1.64591	1.11112	1.65408	2.0839	2.31181	2.89472	2.30764	3.01707	2.97563	2.74994	3.75255	3.91181	3.90154
159	0.872299	2.17567	1.48889	1.15862	1.65408	2.16357	2.3514	2.83327	2.30764	3.11791	2.81691	2.88737	3.45832	3.76848	3.88053
160	0.869454	2.37144	1.48889	1.27026	1.27458	2.16357	2.48916	2.83327	1.9624	3.01707	2.81691	2.88737	3.24493	3.90971	3.82801
161	0.833412	2.37144	1.42988	1.27026	1.26636	2.34979	2.51865	2.79067	1.9624	2.94758	3.11071	2.88737	3.16302	3.90971	3.69203
162	0.833412	2.05595	1.42988	1.27026	1.18424	2.34979	2.61401	2.49066	2.13505	2.94758	3.11071	2.95988	3.16302	4.03115	3.52785
163	0.738873	1.87228	1.34352	1.433	0.90535	2.30717	2.61401	2.49066	2.16423	3.00345	3.11071	2.95988	3.29107	4.03115	3.52785
164	0.471018	1.87228	1.34352	1.433	0.90535	2.30717	2.69928	2.698	2.41389	3.09146	2.93522	2.95988	3.39189	3.56657	3.72355
165	0.471018	2.04287	1.45096	1.70975	0.968993	2.45589	2.58778	2.698	2.41389	3.08601	2.90319	3.10569	3.40736	3.56657	3.90099
166	0.702325	2.04287	1.45096	1.48525	1.07509	2.86795	2.58778	2.48001	2.42184	3.09146	2.88788	3.10569	3.53541	3.59835	4.12817
167	0.715249	1.81412	1.45096	1.66103	1.28244	2.86795	2.58778	2.48001	2.42184	3.66332	2.90319	3.24921	3.53541	3.60615	4.12817
168	0.987602	1.81412	1.34352	1.53994	1.28244	2.95281	2.76563	2.48001	2.38466	3.66332	3.00768	3.29655	3.53541	3.83204	4.03365
169	1.10747	1.81279	1.26548	1.53994	1.07238	2.79636	2.96746	2.56522	2.11379	3.64478	3.25879	3.29655	3.96008	3.98877	3.93636
170	1.10747	1.73572	1.1717	1.16099	1.07238	2.95281	3.1587	2.56522	2.11379	3.63934	3.25879	3.29655	3.96008	3.99377	3.93636
171	1.00969	1.73464	0.979927	1.16099	1.92753	2.79636	3.78761	2.63161	2.34486	3.63934	3.19846	3.42938	3.67207	3.98877	4.09335
172	0.586924	1.53653	0.979927	1.20613	1.92753	2.80194	3.91813	2.88335	2.34486	3.67425	3.19846	3.44237	3.53195	3.98597	4.48086
173	0.522779	1.53653	1.06	1.20613	1.65136	2.67406	4.04521	2.9185	2.34486	3.67425	3.14737	3.44237	3.41324	3.97323	4.62016
174	0.522779	1.62077	1.12325	1.20613	1.4443	2.80194	3.91813	2.9185	2.59183	3.56524	3.03972	3.36758	3.36469	3.97323	4.62016
175	0.289242	1.62077	1.13693	1.22989	1.63558	2.74054	3.85396	2.80701	2.59183	3.56524	3.03972	3.32861	3.36469	3.97323	4.66883
176	0.289242	1.70849	1.13693	1.22989	1.63558	2.74054	3.35216	2.80701	2.35014	3.56524	3.24579	3.20039	3.34335	3.62234	4.78435
177	0.336534	1.70849	1.12012	0.866452	1.75502	2.36555	3.28303	2.86029	2.35014	3.37085	3.56245	3.20039	3.09077	3.62234	4.79154
178	0.499138	1.86023	1.12012	0.866452	1.75502	2.21684	3.28303	2.90784	2.52017	3.37085	3.5717	3.28586	3.09077	3.64353	4.78435
179	0.473254	1.86023	0.928367	0.978093	1.61437	2.20619	3.28303	2.96855	2.73257	3.6873	3.5717	3.36758	3.6149	3.64353	4.70033
180	0.473254	2.07728	0.979927	1.10517	1.61437	2.20619	3.10518	2.90784	2.73257	3.6873	3.44265	3.36758	3.6149	3.47902	4.61685
181	0.473254	2.1946	0.979927	1.2204	1.61437	2.19	3.10518	3.0005	2.51217	3.48506	3.08332	3.67369	3.6197	3.46562	4.70033
182	0.762502	2.20766	1.25291	1.2204	1.59315	2.19	2.94627	2.894	2.51217	3.48506	3.08332	3.72103	3.82964	3.46562	4.79154
183	0.949387	2.20766	1.29198	1.20852	1.59315	2.30164	2.57718	2.81521	2.67679	3.52759	3.05129	3.89288	3.915	3.57998	4.79154
184	1.15249	2.05114	1.29198	1.20852	1.74959	2.43758	2.50528	2.60214	2.75116	3.63962	3.07264	4.30583	3.98041	3.83984	4.64449
185	1.02589	1.88986	0.847146	1.57314	1.80019	2.46654	2.22428	2.60214	2.75116	3.63962	3.02066	4.30583	4.19967	3.86382	4.50187
186	1.02589	1.58159	0.795582	1.57314	1.80019	2.46654	2.22428	2.57835	2.75116	3.63934	3.07264	4.25934	4.19967	4.06574	4.50187
187	0.899816	1.53064	0.682745	1.57314	1.52648	2.41881	2.36982	2.50948	3.08579	3.63934	3.48767	3.91799	3.68132	4.18292	4.48086
188	0.640386	1.47013	0.682745	1.81306	1.44158	2.41881	2.74165	2.41362	3.08579	3.66855	3.59305	3.51718	3.68132	4.1901	4.56766
189	0.370296	1.24961	0.697556	1.86534	1.44158	2.41881	2.74165	2.36357	2.99285	3.66855	3.59305	3.2668	3.66479	4.29166	4.76666
190	0.270134	1.24961	0.770215	1.92117	1.44158	2.44267	2.59282	2.35539	2.94504	3.11272	3.58471	3.2668	3.66479	4.73225	4.76666
191	0.270134	1.2864	0.770215	1.9936	1.29819	2.28587	2.36477	2.15622	2.78039	3.11272	3.58471	3.46374	3.55087	4.73225	4.62735
192	0.432736	1.30534	0.866308	1.9936	1.29819	2.15848	2.36477	2.02668	2.78039	2.99552	3.84329	3.53478	3.55087	4.55152	4.62735
193	0.434999	1.39546	0.938913	1.91639	1.62742	2.05449	2.60618	2.02668	2.80164	2.99552	3.95702	3.65231	4.00757	4.1505	4.71801
194	0.437272	1.44533	1.03578	1.34154	1.71532	2.05449	2.6988	2.45871	2.82553	2.99552	4.09679	3.65231	4.13801	4.1505	4.73516
195	0.462561	1.39546	1.06427	1.06004	1.95965	2.06514	2.81358	2.68488	2.99285	3.03536	4.09679	3.65231	4.37652	4.41099	4.73516
196	0.698347	1.38479	1.06427	1.06004	1.98875	2.1687	2.9407	2.68488	3.03799	3.03536	4.03409	3.7554	4.41201	4.44558	4.92034
197	0.768731	0.959273	0.993611	1.34746	2.00483	2.1687	2.9407	2.47504	3.19204	2.87569	3.72582	3.92029	4.37652	4.44558	4.93036
198	0.768731	0.959273	0.993611	1.34746	2.00483	2.24582	2.60116	2.47504	3.03799	2.87569	3.72582	3.92029	4.28154	4.37081	5.17519
199	0.494642	0.98404	1.24236	1.34746	2.00483	2.37069	2.60116	2.65788	2.96097	2.98761	3.82193	3.92029	4.24126	4.37081	5.17519

## Sheet: Panel_D
time	vEyeVel350_Mean	vEyeVel350_95ci_low	vEyeVel350_95ci_up	vEyeVel300_Mean	vEyeVel300_95ci_low	vEyeVel300_95ci_up	vEyeVel250_Mean	vEyeVel250_95ci_low	vEyeVel250_95ci_up	vEyeVel200_Mean	vEyeVel200_95ci_low	vEyeVel200_95ci_up
-100	4.00652	-2.49245	10.5055	3.28666	-2.97879	9.5521	3.12146	-3.10364	9.34656	2.87365	-3.30922	9.05652
-99	4.16988	-2.15693	10.4967	3.47942	-2.63548	9.59431	3.33283	-2.75929	9.42495	3.06327	-2.99658	9.12311
-98	3.80314	-2.32969	9.93596	3.18578	-2.7536	9.12517	3.04379	-2.88279	8.97038	2.79387	-3.10929	8.69702
-97	3.10819	-2.83157	9.04795	2.58418	-3.1749	8.34325	2.44851	-3.29702	8.19404	2.25449	-3.47279	7.98177
-96	2.34128	-3.41224	8.0948	1.91759	-3.65813	7.49332	1.78825	-3.76355	7.34005	1.68308	-3.85054	7.2167
-95	1.74706	-3.81419	7.30832	1.40538	-3.97436	6.78513	1.29497	-4.04566	6.63561	1.29375	-4.02436	6.61185
-94	1.45347	-3.89147	6.79842	1.15861	-3.99826	6.31547	1.08124	-4.02365	6.18613	1.18017	-3.89544	6.25577
-93	1.45105	-3.66749	6.56958	1.18995	-3.73139	6.11128	1.14971	-3.71382	6.01324	1.34152	-3.48793	6.17098
-92	1.71843	-3.1999	6.63676	1.48084	-3.23126	6.19295	1.48527	-3.17244	6.14298	1.74033	-2.88354	6.36419
-91	2.05724	-2.72807	6.84254	1.85588	-2.71489	6.42664	1.89428	-2.63152	6.42008	2.18568	-2.31092	6.68227
-90	2.33881	-2.38876	7.06638	2.16706	-2.34018	6.67431	2.22433	-2.24767	6.69632	2.52532	-1.92381	6.97446
-89	2.44395	-2.27855	7.16645	2.29499	-2.20489	6.79487	2.35064	-2.1176	6.81887	2.6394	-1.81177	7.09058
-88	2.23128	-2.48771	6.95027	2.11401	-2.38451	6.61252	2.13549	-2.32925	6.60023	2.3904	-2.05858	6.83937
-87	1.58447	-3.08411	6.25305	1.51144	-2.94493	5.96781	1.48546	-2.9307	5.90161	1.69014	-2.70696	6.08725
-86	0.625642	-3.93746	5.18874	0.573356	-3.79234	4.93905	0.48808	-3.83069	4.80685	0.643476	-3.6515	4.93845
-85	-0.4707	-4.89935	3.95795	-0.561895	-4.81069	3.6869	-0.713791	-4.91096	3.48338	-0.611996	-4.77988	3.55589
-84	-1.66626	-5.99138	2.65887	-1.82848	-5.99059	2.33364	-2.02143	-6.12985	2.087	-1.97275	-6.04737	2.10187
-83	-2.73406	-7.04562	1.5775	-3.01911	-7.18049	1.14227	-3.23282	-7.34048	0.874845	-3.22006	-7.29022	0.850106
-82	-3.48873	-7.89083	0.913357	-3.94207	-8.20134	0.317199	-4.1418	-8.34727	0.0636711	-4.15721	-8.32253	0.00811234
-81	-3.76414	-8.32947	0.801182	-4.42573	-8.85534	0.00388248	-4.58444	-8.96066	-0.208207	-4.61654	-8.9504	-0.282686
-80	-3.66608	-8.38153	1.04936	-4.53224	-9.12555	0.0610762	-4.62677	-9.16768	-0.0858659	-4.65248	-9.14981	-0.155148
-79	-3.16981	-7.95833	1.61872	-4.18763	-8.87689	0.501638	-4.22517	-8.86381	0.413464	-4.22489	-8.81957	0.369801
-78	-2.38433	-7.13561	2.36696	-3.47037	-8.1545	1.21375	-3.45671	-8.09287	1.17945	-3.42003	-8.01358	1.17351
-77	-1.42336	-6.05416	3.20744	-2.50718	-7.10174	2.08737	-2.46758	-7.01565	2.08049	-2.37844	-6.88701	2.13012
-76	-0.56578	-5.03499	3.90343	-1.55334	-6.00485	2.89817	-1.5217	-5.92606	2.88266	-1.37679	-5.74759	2.99401
-75	0.0939314	-4.25202	4.43988	-0.69243	-5.00993	3.62507	-0.697735	-4.96555	3.57008	-0.510636	-4.75261	3.73134
-74	0.395459	-3.91245	4.70336	-0.140449	-4.38519	4.10429	-0.193944	-4.38662	3.99873	0.0156595	-4.16004	4.19136
-73	0.336423	-4.01387	4.68671	0.0656748	-4.17951	4.31086	-0.0368068	-4.22838	4.15476	0.1812	-4.00088	4.36328
-72	0.018612	-4.41935	4.45658	-0.0142559	-4.31586	4.28735	-0.150122	-4.39778	4.09754	0.0417699	-4.20007	4.28361
-71	-0.425669	-4.94012	4.08878	-0.295181	-4.66834	4.07797	-0.428292	-4.74759	3.89101	-0.282077	-4.59536	4.0312
-70	-0.950174	-5.52795	3.6276	-0.721492	-5.17338	3.73039	-0.807126	-5.20464	3.59039	-0.715387	-5.10266	3.67188
-69	-1.36302	-5.976	3.24997	-1.11474	-5.62846	3.39897	-1.12422	-5.58308	3.33463	-1.09743	-5.53966	3.3448
-68	-1.5314	-6.15459	3.0918	-1.3286	-5.88067	3.22347	-1.23176	-5.72762	3.26409	-1.27234	-5.74509	3.20042
-67	-1.46151	-6.06628	3.14326	-1.33471	-5.88694	3.21751	-1.12521	-5.62193	3.3715	-1.22279	-5.69094	3.24535
-66	-1.22438	-5.76317	3.31442	-1.16357	-5.66114	3.334	-0.864337	-5.31003	3.58135	-1.0104	-5.42368	3.40289
-65	-0.850663	-5.27536	3.57404	-0.845417	-5.23494	3.5441	-0.501847	-4.84552	3.84182	-0.688999	-4.99904	3.62104
-64	-0.554904	-4.85068	3.74087	-0.573422	-4.83167	3.68483	-0.244146	-4.46431	3.97602	-0.445863	-4.63269	3.74097
-63	-0.469726	-4.6733	3.73385	-0.47583	-4.62995	3.67829	-0.220077	-4.34431	3.90416	-0.421626	-4.51317	3.66992
-62	-0.632447	-4.84135	3.57645	-0.575883	-4.70983	3.55806	-0.460001	-4.57155	3.65155	-0.641308	-4.71993	3.43731
-61	-1.08982	-5.42042	3.24079	-0.936573	-5.15275	3.2796	-0.98832	-5.18784	3.2112	-1.1319	-5.29712	3.03333
-60	-1.66299	-6.20477	2.87879	-1.41833	-5.80045	2.96379	-1.6418	-6.01102	2.72742	-1.72082	-6.05317	2.61154
-59	-2.32608	-7.08746	2.43529	-2.01313	-6.57402	2.54775	-2.39848	-6.94825	2.1513	-2.40795	-6.92009	2.10419
-58	-2.95177	-7.86395	1.96041	-2.59252	-7.27802	2.09298	-3.09612	-7.77155	1.5793	-3.02832	-7.66828	1.61164
-57	-3.35964	-8.32551	1.60624	-2.97704	-7.70736	1.75328	-3.53265	-8.24985	1.18455	-3.39267	-8.07975	1.29441
-56	-3.41737	-8.33132	1.49658	-3.05906	-7.74874	1.63063	-3.60325	-8.2759	1.0694	-3.40096	-8.05203	1.25011
-55	-3.22935	-8.02045	1.56174	-2.93232	-7.52753	1.66289	-3.39957	-7.97221	1.17306	-3.1753	-7.73238	1.38177
-54	-2.81898	-7.47384	1.83587	-2.60155	-7.09439	1.89129	-2.94312	-7.40668	1.52043	-2.72113	-7.17212	1.72986
-53	-2.2983	-6.86047	2.26388	-2.16714	-6.59658	2.26229	-2.3508	-6.74614	2.04454	-2.1762	-6.55644	2.20403
-52	-1.82616	-6.3741	2.72178	-1.78068	-6.20911	2.64774	-1.80416	-6.19542	2.5871	-1.72005	-6.08843	2.64833
-51	-1.36883	-5.98223	3.24458	-1.41091	-5.89823	3.07641	-1.28398	-5.7329	3.16494	-1.3062	-5.72422	3.11182
-50	-1.10091	-5.82029	3.61846	-1.22246	-5.79443	3.3495	-0.976475	-5.50959	3.55664	-1.12695	-5.62401	3.37011
-49	-1.0177	-5.8342	3.79879	-1.1808	-5.82373	3.46214	-0.855754	-5.4636	3.75209	-1.1356	-5.70815	3.43695
-48	-1.06233	-5.92235	3.79768	-1.23746	-5.90046	3.42553	-0.867571	-5.50506	3.76992	-1.25954	-5.86864	3.34955
-47	-1.22836	-6.07615	3.61943	-1.39045	-6.02569	3.2448	-1.01693	-5.64035	3.6065	-1.49296	-6.09919	3.11328
-46	-1.46969	-6.27171	3.33232	-1.57996	-6.16168	3.00176	-1.2372	-5.82161	3.34722	-1.76621	-6.34561	2.81319
-45	-1.69954	-6.44073	3.04165	-1.72666	-6.25122	2.79789	-1.43228	-5.96855	3.10398	-1.99116	-6.5333	2.55099
-44	-1.85291	-6.5459	2.84008	-1.77101	-6.26023	2.7182	-1.54546	-6.04467	2.95376	-2.08545	-6.59356	2.42265
-43	-1.86462	-6.52554	2.7963	-1.67614	-6.15198	2.7997	-1.53307	-6.00592	2.93977	-2.03591	-6.51595	2.44413
-42	-1.76021	-6.39022	2.8698	-1.47916	-5.94278	2.98446	-1.43087	-5.87231	3.01058	-1.86621	-6.30891	2.57648
-41	-1.63576	-6.2119	2.94038	-1.26101	-5.68672	3.16471	-1.30266	-5.68889	3.08358	-1.63619	-6.01501	2.74263
-40	-1.50366	-5.97876	2.97144	-1.06955	-5.39974	3.26064	-1.20365	-5.48387	3.07658	-1.41773	-5.68424	2.84879
-39	-1.25234	-5.59343	3.08876	-0.812036	-5.00044	3.37636	-1.03254	-5.1716	3.10653	-1.11599	-5.24101	3.00903
-38	-0.952333	-5.16609	3.26142	-0.561856	-4.60488	3.48117	-0.843565	-4.84661	3.15948	-0.784443	-4.77943	3.21055
-37	-0.653714	-4.77004	3.46262	-0.353878	-4.27712	3.56936	-0.669133	-4.56737	3.2291	-0.467364	-4.3689	3.43417
-36	-0.20834	-4.28038	3.8637	-0.0260101	-3.8874	3.83538	-0.346414	-4.19527	3.50244	-0.0145792	-3.88228	3.85312
-35	0.26003	-3.83532	4.35538	0.317601	-3.55895	4.19415	0.0282777	-3.84166	3.89821	0.478039	-3.42657	4.38265
-34	0.818017	-3.36607	5.0021	0.751116	-3.21591	4.71815	0.525922	-3.43212	4.48396	1.06828	-2.93574	5.0723
-33	1.44728	-2.86684	5.76141	1.25273	-2.85473	5.3602	1.10887	-2.98205	5.1998	1.71691	-2.42533	5.85914
-32	2.10217	-2.37928	6.58362	1.83078	-2.45341	6.11497	1.77691	-2.48162	6.03544	2.41086	-1.89447	6.7162
-31	2.74229	-1.90247	7.38705	2.43007	-2.02637	6.88651	2.46322	-1.96157	6.888	3.09764	-1.36292	7.55821
-30	3.2689	-1.4758	8.0136	2.95506	-1.61137	7.52148	3.06034	-1.4714	7.59208	3.65983	-0.892954	8.21261
-29	3.63381	-1.10902	8.37664	3.37401	-1.20328	7.95129	3.52484	-1.01874	8.06842	4.06653	-0.482352	8.61541
-28	3.83812	-0.804028	8.48026	3.6799	-0.809479	8.16927	3.86669	-0.594324	8.3277	4.32608	-0.124717	8.77687
-27	3.82853	-0.63972	8.29678	3.80686	-0.520822	8.13455	4.02614	-0.28083	8.33311	4.39835	0.112216	8.68448
-26	3.52044	-0.781304	7.82219	3.65294	-0.510437	7.81631	3.89492	-0.253167	8.043	4.16223	0.042841	8.28161
-25	2.94154	-1.26983	7.15291	3.23126	-0.829677	7.29219	3.50139	-0.545585	7.54836	3.67966	-0.335772	7.6951
-24	2.09978	-2.13775	6.33731	2.5262	-1.54167	6.59408	2.84057	-1.21136	6.89249	2.9372	-1.08166	6.95606
-23	1.07513	-3.27357	5.42382	1.60971	-2.54736	5.76678	1.973	-2.16136	6.10735	1.99551	-2.10285	6.09388
-22	0.114109	-4.34717	4.57538	0.722788	-3.53394	4.97952	1.12812	-3.09829	5.35453	1.09668	-3.09028	5.28365
-21	-0.822214	-5.36026	3.71584	-0.208823	-4.54085	4.12321	0.226634	-4.06916	4.52243	0.156932	-4.0962	4.41007
-20	-1.44033	-5.99535	3.1147	-0.890593	-5.24645	3.46526	-0.459498	-4.77368	3.85468	-0.559582	-4.83165	3.71249
-19	-1.66627	-6.19931	2.86678	-1.21906	-5.56635	3.12823	-0.834722	-5.13545	3.46601	-0.954961	-5.22035	3.31043
-18	-1.47	-5.97379	3.03378	-1.15418	-5.48864	3.18027	-0.860629	-5.14427	3.42301	-0.998846	-5.2602	3.26251
-17	-0.858117	-5.36116	3.64493	-0.714108	-5.06331	3.63509	-0.546489	-4.84045	3.74747	-0.703823	-4.99225	3.5846
-16	0.0634601	-4.4679	4.59482	0.0197833	-4.37401	4.41358	0.0300768	-4.30471	4.36486	-0.151011	-4.49569	4.19367
-15	1.14841	-3.41641	5.71324	0.949962	-3.49361	5.39354	0.805643	-3.5774	5.18869	0.611823	-3.79221	5.01586
-14	2.20909	-2.37104	6.78921	1.86867	-2.60683	6.34417	1.59162	-2.82397	6.0072	1.38899	-3.05107	5.82905
-13	3.11439	-1.45365	7.68243	2.6916	-1.78534	7.16853	2.32587	-2.09305	6.7448	2.12344	-2.31741	6.5643
-12	3.73006	-0.809017	8.26914	3.26985	-1.18311	7.72281	2.88279	-1.51302	7.2786	2.7078	-1.70269	7.11829
-11	3.96326	-0.543623	8.47013	3.53996	-0.870593	7.95051	3.20221	-1.14996	7.55438	3.06987	-1.28763	7.42738
-10	3.98803	-0.501409	8.47746	3.66883	-0.697901	8.03555	3.44368	-0.861279	7.74865	3.35941	-0.94312	7.66194
-9	3.84326	-0.642365	8.32888	3.683	-0.645504	8.0115	3.62272	-0.641659	7.8871	3.59388	-0.662705	7.85046
-8	3.54591	-0.945333	8.03715	3.57187	-0.734737	7.87847	3.70073	-0.543309	7.94478	3.72892	-0.502885	7.96073
-7	3.23724	-1.26294	7.73741	3.46373	-0.844823	7.77229	3.77779	-0.476012	8.03159	3.85772	-0.381453	8.0969
-6	2.87929	-1.61031	7.36888	3.30716	-1.00961	7.62392	3.76996	-0.504929	8.04485	3.89168	-0.366689	8.15005
-5	2.588	-1.85212	7.02812	3.18553	-1.12316	7.49421	3.73635	-0.542273	8.01497	3.88941	-0.370583	8.14941
-4	2.36531	-1.98502	6.71564	3.04156	-1.22479	7.30791	3.62088	-0.621382	7.86314	3.79396	-0.428768	8.01669
-3	2.19754	-2.05391	6.44899	2.88222	-1.31767	7.08212	3.40228	-0.770271	7.57482	3.58511	-0.5674	7.73762
-2	2.03168	-2.1455	6.20887	2.66178	-1.46737	6.79092	3.0625	-1.03135	7.15636	3.25187	-0.82107	7.32482
-1	1.85474	-2.29839	6.00787	2.35268	-1.72402	6.42938	2.58966	-1.44375	6.62308	2.77671	-1.23344	6.78687
0	1.74758	-2.45238	5.94753	2.0768	-2.00085	6.15446	2.11713	-1.91472	6.14898	2.29266	-1.71217	6.2975
1	1.7118	-2.57488	5.99848	1.84063	-2.28057	5.96184	1.68638	-2.39609	5.76885	1.83114	-2.2186	5.88088
2	1.7309	-2.63937	6.10118	1.67132	-2.51199	5.85463	1.35654	-2.79915	5.51222	1.45633	-2.66065	5.57331
3	1.78329	-2.63458	6.20115	1.60077	-2.63314	5.83469	1.17038	-3.04565	5.38641	1.19144	-2.98193	5.36481
4	1.81402	-2.61209	6.24014	1.6001	-2.65774	5.85794	1.10943	-3.13465	5.3535	1.03464	-3.16666	5.23594
5	1.77066	-2.65389	6.19522	1.60226	-2.67133	5.87586	1.12298	-3.13356	5.37952	0.936751	-3.28158	5.15508
6	1.69859	-2.73594	6.13311	1.65395	-2.63643	5.94433	1.24596	-3.01699	5.50891	0.948266	-3.28453	5.18106
7	1.36109	-3.11501	5.8372	1.52661	-2.80197	5.85519	1.23903	-3.04835	5.52641	0.851736	-3.4133	5.11677
8	0.740505	-3.79961	5.28062	1.14988	-3.23199	5.53175	1.01084	-3.31723	5.33891	0.575115	-3.73445	4.88468
9	-0.147107	-4.75189	4.45768	0.478084	-3.95489	4.91106	0.501728	-3.86858	4.87203	0.0702019	-4.28019	4.42059
10	-1.22437	-5.85852	3.40977	-0.405489	-4.85722	4.04625	-0.242616	-4.62884	4.14361	-0.608923	-4.96952	3.75168
11	-2.47194	-7.10545	2.16156	-1.47028	-5.92006	2.9795	-1.18982	-5.57666	3.19701	-1.43775	-5.79279	2.91729
12	-3.71431	-8.33126	0.902639	-2.61558	-7.05575	1.82459	-2.24788	-6.63212	2.13636	-2.33634	-6.68646	2.01378
13	-4.76603	-9.35908	-0.172975	-3.63615	-8.06497	0.792671	-3.24132	-7.62174	1.13911	-3.15711	-7.50869	1.19446
14	-5.6135	-10.1948	-1.03216	-4.486	-8.9159	-0.0561075	-4.10998	-8.49792	0.277961	-3.86488	-8.23637	0.50661
15	-6.0611	-10.6328	-1.48939	-4.96677	-9.39621	-0.537331	-4.64618	-9.03566	-0.256701	-4.26907	-8.6576	0.119455
16	-6.16808	-10.7141	-1.62205	-5.09635	-9.50454	-0.68816	-4.86863	-9.23434	-0.502921	-4.40841	-8.78734	-0.0294925
17	-5.95737	-10.4548	-1.45993	-4.89724	-9.25333	-0.541141	-4.78373	-9.09269	-0.474771	-4.29918	-8.63073	0.0323689
18	-5.53017	-9.96535	-1.09499	-4.46622	-8.7495	-0.182935	-4.47855	-8.71075	-0.246352	-4.01823	-8.27489	0.23844
19	-4.92838	-9.3143	-0.542465	-3.80939	-8.03076	0.411975	-3.93553	-8.10766	0.236598	-3.53498	-7.72732	0.657362
20	-4.20735	-8.59169	0.176998	-3.02625	-7.23525	1.18275	-3.24877	-7.41867	0.921133	-2.92913	-7.11134	1.25308
21	-3.45048	-7.90585	1.00488	-2.22227	-6.49885	2.05431	-2.52013	-6.77546	1.73519	-2.28926	-6.54704	1.96852
22	-2.70799	-7.29455	1.87857	-1.48337	-5.89579	2.92905	-1.82419	-6.23403	2.58565	-1.65327	-6.058	2.75147
23	-1.91855	-6.65113	2.81404	-0.768013	-5.33835	3.80232	-1.12325	-5.70566	3.45916	-0.986755	-5.55779	3.58428
24	-1.04845	-5.89569	3.79878	-0.060586	-4.75866	4.63749	-0.411642	-5.12751	4.30422	-0.282539	-4.98231	4.41724
25	-0.133908	-5.02398	4.75616	0.572843	-4.17608	5.32176	0.257231	-4.50395	5.01841	0.403789	-4.33993	5.14751
26	0.830133	-4.02965	5.68991	1.16364	-3.55869	5.88598	0.871172	-3.85194	5.59428	1.04533	-3.66092	5.75157
27	1.84352	-2.91946	6.60651	1.75958	-2.86805	6.3872	1.49243	-3.12295	6.10781	1.69009	-2.90783	6.28802
28	2.82534	-1.81227	7.46295	2.29472	-2.20691	6.79636	2.05145	-2.42786	6.53077	2.25994	-2.19909	6.71897
29	3.72421	-0.79737	8.2458	2.77984	-1.60775	7.16744	2.54416	-1.81842	6.90675	2.73615	-1.59938	7.07168
30	4.54087	0.0965272	8.98521	3.26123	-1.0525	7.57496	3.02226	-1.27128	7.3158	3.16407	-1.09309	7.42123
31	5.1578	0.746287	9.56931	3.65795	-0.626946	7.94284	3.41434	-0.856755	7.68544	3.48677	-0.741696	7.71523
32	5.53332	1.13458	9.93206	3.95248	-0.326514	8.23148	3.70557	-0.563208	7.97434	3.6966	-0.530478	7.92367
33	5.55476	1.16919	9.94032	4.03664	-0.236551	8.30984	3.78332	-0.475966	8.04261	3.68961	-0.536457	7.91568
34	5.30208	0.944801	9.65937	3.94626	-0.306581	8.1991	3.70354	-0.52627	7.93335	3.53891	-0.669933	7.74776
35	4.79525	0.483558	9.10695	3.64988	-0.564097	7.86385	3.4206	-0.758692	7.59988	3.21149	-0.955842	7.37883
36	3.95973	-0.313532	8.23299	3.07128	-1.09983	7.2424	2.85989	-1.26599	6.98577	2.64318	-1.47266	6.75903
37	2.95917	-1.31046	7.2288	2.32921	-1.81912	6.47755	2.14386	-1.95315	6.24088	1.9419	-2.13973	6.02353
38	1.8063	-2.49746	6.11007	1.3713	-2.77719	5.51978	1.21214	-2.88665	5.31092	1.05017	-3.02349	5.12383
39	0.697531	-3.67201	5.06707	0.365646	-3.81036	4.54165	0.226779	-3.9088	4.36236	0.108201	-3.9935	4.2099
40	-0.262175	-4.68653	4.16218	-0.537897	-4.74222	3.66642	-0.656552	-4.83399	3.52088	-0.743649	-4.88299	3.39569
41	-1.05219	-5.5006	3.39622	-1.34017	-5.56413	2.8838	-1.44577	-5.65649	2.76494	-1.51436	-5.68618	2.65747
42	-1.63012	-6.06758	2.80734	-1.99385	-6.22794	2.24024	-2.09382	-6.32318	2.13554	-2.16848	-6.35986	2.0229
43	-2.07921	-6.47951	2.32108	-2.53575	-6.77061	1.6991	-2.63536	-6.86602	1.5953	-2.74134	-6.93507	1.4524
44	-2.27757	-6.62304	2.0679	-2.8015	-7.02164	1.41864	-2.90706	-7.11917	1.30505	-3.05922	-7.23553	1.11709
45	-2.28888	-6.58436	2.00661	-2.8367	-7.03525	1.36185	-2.95487	-7.13847	1.22872	-3.14599	-7.29447	1.0025
46	-2.15214	-6.42106	2.11678	-2.6762	-6.85485	1.50246	-2.80971	-6.96692	1.3475	-3.04242	-7.16574	1.08091
47	-2.03596	-6.30834	2.23642	-2.49361	-6.66333	1.67611	-2.64516	-6.78931	1.49898	-2.89798	-7.00902	1.21307
48	-1.99302	-6.30571	2.31968	-2.33709	-6.52199	1.84781	-2.50559	-6.66015	1.64896	-2.75033	-6.87162	1.37095
49	-1.93284	-6.30219	2.43652	-2.13108	-6.34656	2.08441	-2.32307	-6.50379	1.85764	-2.53576	-6.68297	1.61145
50	-1.96608	-6.39928	2.46712	-1.98772	-6.24076	2.26532	-2.20625	-6.42105	2.00855	-2.38317	-6.56651	1.80016
51	-2.07367	-6.57818	2.43084	-1.9284	-6.23104	2.37424	-2.17907	-6.44205	2.08391	-2.30483	-6.54088	1.93122
52	-2.04982	-6.6103	2.51066	-1.80614	-6.14698	2.53471	-2.09509	-6.39892	2.20874	-2.17257	-6.45807	2.11293
53	-2.02763	-6.62405	2.5688	-1.72148	-6.08483	2.64187	-2.05745	-6.39065	2.27576	-2.10358	-6.42815	2.22099
54	-1.99335	-6.61166	2.62497	-1.70385	-6.08309	2.67539	-2.07873	-6.43267	2.27521	-2.10431	-6.45892	2.25029
55	-1.98869	-6.61328	2.6359	-1.78353	-6.17503	2.60796	-2.19169	-6.56002	2.17665	-2.20637	-6.57907	2.16634
56	-2.01705	-6.62748	2.59338	-1.93929	-6.33521	2.45662	-2.37387	-6.74526	1.99751	-2.39382	-6.76705	1.97941
57	-2.20812	-6.79141	2.37516	-2.27762	-6.67137	2.11613	-2.72378	-7.08777	1.64021	-2.7524	-7.10954	1.60475
58	-2.61739	-7.14773	1.91296	-2.85047	-7.21599	1.51505	-3.29665	-7.62532	1.03202	-3.34028	-7.65067	0.970114
59	-3.17998	-7.62763	1.26767	-3.53297	-7.8321	0.76615	-3.95455	-8.21044	0.301335	-4.02538	-8.25283	0.202084
60	-3.90381	-8.2464	0.438777	-4.32083	-8.51826	-0.123394	-4.70304	-8.85294	-0.553142	-4.81269	-8.92693	-0.698449
61	-4.58186	-8.8146	-0.349112	-5.0211	-9.10549	-0.936704	-5.33735	-9.37173	-1.30298	-5.49291	-9.48959	-1.49622
62	-5.17278	-9.32497	-1.02058	-5.55701	-9.55356	-1.56045	-5.80784	-9.75604	-1.85964	-6.02016	-9.93458	-2.10574
63	-5.53085	-9.65397	-1.40773	-5.81862	-9.783	-1.85424	-6.00193	-9.92209	-2.08178	-6.27834	-10.1749	-2.38175
64	-5.53141	-9.70029	-1.36254	-5.73483	-9.74509	-1.72456	-5.8621	-9.83398	-1.89022	-6.19696	-10.1585	-2.23538
65	-5.18804	-9.47272	-0.903365	-5.31628	-9.44336	-1.18919	-5.40343	-9.49691	-1.30996	-5.78128	-9.87765	-1.68491
66	-4.55018	-8.98368	-0.116683	-4.60471	-8.8797	-0.329722	-4.67867	-8.92111	-0.436234	-5.0822	-9.33781	-0.826583
67	-3.67602	-8.24255	0.890499	-3.70907	-8.1133	0.695171	-3.79264	-8.16162	0.57635	-4.18845	-8.57234	0.195445
68	-2.68092	-7.30893	1.94708	-2.74143	-7.20308	1.72023	-2.84326	-7.26427	1.57776	-3.20011	-7.62953	1.22932
69	-1.67045	-6.25875	2.91784	-1.76188	-6.17974	2.65598	-1.89897	-6.27141	2.47347	-2.19332	-6.56172	2.17508
70	-0.742075	-5.17668	3.69253	-0.860344	-5.11886	3.39817	-1.03941	-5.25047	3.17166	-1.25863	-5.45131	2.93406
71	0.0393992	-4.17028	4.24908	-0.0928125	-4.12179	3.93617	-0.30008	-4.28441	3.68425	-0.429472	-4.38394	3.52499
72	0.714769	-3.26246	4.692	0.594025	-3.20629	4.39434	0.37822	-3.38548	4.14192	0.335477	-3.39403	4.06499
73	1.38456	-2.4286	5.19773	1.29266	-2.3609	4.94622	1.08226	-2.54584	4.71036	1.10627	-2.49254	4.70507
74	2.21002	-1.57778	5.99782	2.16452	-1.4903	5.81935	1.98338	-1.65747	5.62422	2.05365	-1.5682	5.67549
75	3.22167	-0.669837	7.11318	3.22193	-0.559223	7.00308	3.08112	-0.694949	6.85718	3.16796	-0.596649	6.93258
76	4.33655	0.27712	8.39598	4.36974	0.415141	8.32433	4.28632	0.331008	8.24164	4.3678	0.424471	8.31113
77	5.57552	1.3591	9.79193	5.60493	1.50176	9.70809	5.59277	1.48442	9.70113	5.65399	1.56627	9.74171
78	6.9477	2.62963	11.2658	6.9505	2.763	11.138	6.99938	2.80317	11.1956	7.02694	2.86334	11.1906
79	8.38748	4.03302	12.7419	8.35677	4.14512	12.5684	8.46671	4.24526	12.6882	8.44522	4.26569	12.6248
80	9.73759	5.3847	14.0905	9.68175	5.46933	13.8942	9.84553	5.62523	14.0658	9.78604	5.60939	13.9627
81	11.1239	6.77075	15.477	11.0089	6.78255	15.2352	11.2123	6.98539	15.4392	11.1241	6.93515	15.313
82	12.3208	7.97044	16.6711	12.1721	7.92923	16.4149	12.3972	8.168	16.6265	12.2933	8.09371	16.4929
83	13.4687	9.10365	17.8338	13.3236	9.05985	17.5873	13.5458	9.31455	17.7771	13.4503	9.24439	17.6563
84	14.615	10.2221	19.0078	14.4837	10.2074	18.7599	14.695	10.4675	18.9225	14.6386	10.4385	18.8388
85	15.9248	11.4828	20.3668	15.8492	11.5574	20.141	16.0329	11.8005	20.2653	16.0233	11.8228	20.2237
86	17.403	12.907	21.8991	17.3862	13.0749	21.6974	17.5331	13.2837	21.7826	17.5844	13.3653	21.8034
87	19.2575	14.7256	23.7893	19.2765	14.9481	23.6048	19.3736	15.102	23.6452	19.4837	15.2309	23.7364
88	21.3358	16.815	25.8565	21.3718	17.0498	25.6938	21.4188	17.1431	25.6946	21.5778	17.3	25.8557
89	23.5465	19.1153	27.9778	23.5858	19.3241	27.8476	23.5809	19.3517	27.8102	23.7616	19.5106	28.0125
90	25.8716	21.5619	30.1812	25.8729	21.6919	30.0538	25.8286	21.6664	29.9907	26.0078	21.8134	30.2022
91	28.0245	23.8252	32.2239	27.9894	23.8866	32.0923	27.9023	23.805	31.9997	28.0539	23.9299	32.178
92	29.793	25.6194	33.9666	29.7396	25.6507	33.8285	29.62	25.5267	33.7132	29.7193	25.6192	33.8195
93	31.1871	26.9218	35.4525	31.1361	26.9682	35.304	30.9951	26.8185	35.1716	31.0352	26.8758	35.1946
94	32.2141	27.7659	36.6624	32.1845	27.8655	36.5035	32.0482	27.7241	36.3722	32.0249	27.7357	36.3141
95	32.7302	28.0781	37.3822	32.7538	28.2664	37.2411	32.6337	28.1509	37.1165	32.5617	28.1212	37.0021
96	33.0171	28.2238	37.8105	33.0953	28.4931	37.6976	32.997	28.4111	37.5829	32.8912	28.3467	37.4356
97	33.1505	28.3268	37.9741	33.2783	28.6559	37.9008	33.2052	28.6102	37.8002	33.0884	28.5314	37.6455
98	33.2629	28.5179	38.0078	33.4168	28.8657	37.9679	33.3526	28.8349	37.8703	33.2323	28.7496	37.7149
99	33.5104	28.9249	38.096	33.6404	29.2271	38.0537	33.5631	29.1854	37.9408	33.4375	29.0933	37.7817
100	33.9404	29.535	38.3458	34.017	29.7561	38.2779	33.9096	29.6832	38.136	33.7836	29.5902	37.977
101	34.5616	30.2877	38.8356	34.5498	30.394	38.7055	34.386	30.2643	38.5076	34.2643	30.1732	38.3554
102	35.2419	31.0095	39.4743	35.1379	31.0117	39.2642	34.9069	30.817	38.9969	34.7906	30.7247	38.8565
103	35.8956	31.6181	40.1731	35.7091	31.5469	39.8712	35.4149	31.2938	39.5359	35.3139	31.2081	39.4197
104	36.3087	31.9518	40.6657	36.081	31.8622	40.2999	35.7322	31.5587	39.9056	35.6657	31.498	39.8334
105	36.4361	32.0144	40.8577	36.2366	31.979	40.4943	35.862	31.6517	40.0723	35.8494	31.6381	40.0608
106	36.2899	31.8569	40.723	36.1871	31.9349	40.4393	35.8288	31.6241	40.0335	35.9005	31.6902	40.1108
107	35.8212	31.4407	40.2016	35.8692	31.6677	40.0707	35.5706	31.4155	39.7257	35.7371	31.5732	39.9009
108	35.2437	30.9529	39.5345	35.4746	31.3389	39.6102	35.274	31.1829	39.3651	35.5318	31.4301	39.6334
109	34.6351	30.4218	38.8484	35.0515	30.9535	39.1495	34.9736	30.9183	39.0288	35.3149	31.2486	39.3813
110	34.0456	29.8494	38.2418	34.6027	30.4856	38.7199	34.6542	30.5785	38.7299	35.0582	30.9729	39.1435
111	33.5469	29.2821	37.8116	34.1654	29.9677	38.3631	34.3355	30.1789	38.4921	34.7576	30.5976	38.9177
112	33.2774	28.8962	37.6585	33.8646	29.5657	38.1634	34.1105	29.8536	38.3674	34.5131	30.2618	38.7644
113	32.9456	28.4386	37.4526	33.4073	29.0165	37.7981	33.69	29.3444	38.0356	34.046	29.7158	38.3761
114	32.5151	27.9363	37.0938	32.7625	28.3341	37.1908	33.0451	28.6669	37.4232	33.3192	28.9659	37.6725
115	31.9541	27.3814	36.5268	31.9255	27.5209	36.3301	32.1698	27.8202	36.5194	32.3429	28.0245	36.6614
116	31.2115	26.7033	35.7198	30.8882	26.5386	35.2378	31.0734	26.782	35.3649	31.1372	26.8797	35.3947
117	30.2029	25.7678	34.6379	29.5694	25.2676	33.8712	29.6741	25.4307	33.9175	29.6283	25.4192	33.8375
118	29.0353	24.6283	33.4423	28.1554	23.8556	32.4553	28.1867	23.9427	32.4308	28.0302	23.8178	32.2425
119	27.7654	23.3197	32.2111	26.7457	22.4002	31.0911	26.7097	22.4152	31.0042	26.4461	22.1782	30.714
120	26.5661	22.0421	31.09	25.4757	21.0713	29.8801	25.3858	21.0279	29.7437	25.0274	20.6875	29.3673
121	25.5257	20.9389	30.1126	24.4482	20.0163	28.8801	24.3117	19.9225	28.701	23.8737	19.4903	28.2572
122	24.6767	20.0801	29.2733	23.7319	19.3269	28.1369	23.5379	19.1722	27.9035	23.0325	18.6586	27.4064
123	24.103	19.5388	28.6673	23.3429	18.9922	27.6936	23.0947	18.7837	27.4058	22.5431	18.2105	26.8757
124	23.6497	19.1396	28.1597	23.1054	18.8085	27.4024	22.8082	18.5534	27.0631	22.2437	17.9625	26.5249
125	23.4696	18.9973	27.9419	23.1523	18.8749	27.4297	22.8114	18.5807	27.0422	22.2632	18.0103	26.516
126	23.3741	18.9093	27.8388	23.2931	19.0002	27.5859	22.9281	18.6873	27.1689	22.4313	18.1809	26.6816
127	23.3033	18.8405	27.7661	23.4188	19.1094	27.7283	23.0623	18.8082	27.3164	22.6417	18.3941	26.8893
128	23.3146	18.878	27.7512	23.5821	19.2905	27.8737	23.2613	19.0245	27.4981	22.9409	18.7255	27.1564
129	23.3065	18.898	27.715	23.6688	19.4092	27.9285	23.4193	19.2111	27.6275	23.2059	19.0286	27.3833
130	23.2174	18.8518	27.5829	23.6317	19.4183	27.8451	23.4642	19.2968	27.6315	23.3639	19.2323	27.4954
131	23.0163	18.6703	27.3623	23.428	19.2341	27.6219	23.3412	19.1893	27.4931	23.3345	19.2198	27.4492
132	22.6698	18.327	27.0127	23.029	18.8311	27.2268	23.0052	18.8491	27.1612	23.0643	18.9455	27.1832
133	22.0039	17.659	26.3487	22.2708	18.0585	26.483	22.2811	18.1146	26.4476	22.3848	18.2542	26.5154
134	21.2417	16.9038	25.5795	21.3942	17.1745	25.614	21.3932	17.2251	25.5612	21.5031	17.3677	25.6384
135	20.3496	16.0313	24.668	20.3743	16.1655	24.583	20.327	16.1757	24.4783	20.4102	16.2874	24.533
136	19.3005	14.9746	23.6265	19.1906	14.9761	23.4051	19.0753	14.9218	23.2289	19.1095	14.9794	23.2397
137	18.2426	13.8561	22.629	17.9772	13.7147	22.2396	17.7848	13.5831	21.9866	17.7677	13.5865	21.949
138	17.2696	12.7865	21.7528	16.8785	12.5381	21.2189	16.6141	12.3308	20.8975	16.5441	12.2809	20.8072
139	16.4242	11.8494	20.999	15.9507	11.5366	20.3647	15.6465	11.2854	20.0076	15.5454	11.2071	19.8837
140	15.7278	11.1025	20.3531	15.2197	10.7697	19.6697	14.9233	10.5235	19.323	14.8068	10.4351	19.1785
141	15.3344	10.7269	19.942	14.8668	10.4438	19.2898	14.6197	10.2472	18.9922	14.5057	10.1657	18.8457
142	15.0642	10.528	19.6003	14.7147	10.3665	19.063	14.5505	10.2555	18.8455	14.455	10.1943	18.7158
143	14.8471	10.4143	19.2798	14.6542	10.4068	18.9016	14.5962	10.405	18.7873	14.5265	10.3672	18.6857
144	14.7356	10.3998	19.0715	14.7604	10.599	18.9218	14.7989	10.6951	18.9028	14.745	10.6673	18.8228
145	14.5764	10.2837	18.869	14.8427	10.7073	18.978	14.9628	10.883	19.0426	14.911	10.8509	18.971
146	14.3462	10.0437	18.6486	14.8152	10.6534	18.9771	14.9765	10.8658	19.0872	14.9074	10.812	19.0028
147	14.1796	9.80651	18.5526	14.7931	10.5504	19.0357	14.9537	10.7579	19.1495	14.8459	10.6647	19.0271
148	13.9098	9.44084	18.3787	14.621	10.2783	18.9637	14.7326	10.4337	19.0315	14.5691	10.2865	18.8518
149	13.535	9.00114	18.0689	14.2352	9.82845	18.642	14.2803	9.91506	18.6456	14.0608	9.71523	18.4063
150	13.1113	8.57042	17.6522	13.676	9.26622	18.0858	13.6403	9.2703	18.0103	13.3789	9.03212	17.7257
151	12.6721	8.1864	17.1578	13.0668	8.71495	17.4187	12.9425	8.62949	17.2555	12.653	8.36556	16.9405
152	12.1341	7.7346	16.5336	12.3148	8.05133	16.5783	12.1276	7.90303	16.3521	11.8324	7.63613	16.0287
153	11.517	7.1764	15.8576	11.4797	7.27945	15.6799	11.2574	7.09778	15.4169	10.9776	6.84981	15.1055
154	10.8659	6.51414	15.2177	10.6485	6.44502	14.852	10.4195	6.26018	14.5788	10.1733	6.04988	14.2968
155	10.1801	5.73169	14.6286	9.85233	5.56455	14.1401	9.64662	5.40807	13.8852	9.43249	5.23333	13.6317
156	9.5351	4.95956	14.1106	9.17226	4.76924	13.5753	9.01553	4.66684	13.3642	8.82799	4.52012	13.1359
157	9.01729	4.33528	13.6993	8.71361	4.21683	13.2104	8.6135	4.175	13.052	8.44274	4.04335	12.8421
158	8.71473	3.99595	13.4335	8.53671	4.01336	13.06	8.4852	4.02125	12.9492	8.31564	3.88604	12.7452
159	8.58954	3.92556	13.2535	8.60213	4.13902	13.0652	8.58663	4.18175	12.9915	8.4228	4.04506	12.8005
160	8.73877	4.1984	13.2791	8.94525	4.60476	13.2857	8.94652	4.66161	13.2314	8.79417	4.5274	13.0609
161	9.15192	4.74851	13.5553	9.5384	5.32451	13.7523	9.52328	5.36154	13.685	9.38475	5.23226	13.5372
162	9.53813	5.2266	13.8497	10.0738	5.93543	14.2122	10.0258	5.93631	14.1152	9.92689	5.84076	14.013
163	9.925	5.60063	14.2494	10.5336	6.3706	14.6966	10.4272	6.31063	14.5437	10.3883	6.27396	14.5027
164	10.4139	5.98079	14.847	11.0065	6.73471	15.2783	10.8307	6.60246	15.0589	10.8539	6.63083	15.077
165	10.7163	6.12956	15.303	11.2273	6.81965	15.6349	10.9882	6.62035	15.356	11.0679	6.71055	15.4253
166	10.8993	6.18728	15.6114	11.2313	6.72576	15.7368	10.945	6.47601	15.4141	11.0789	6.62697	15.5308
167	10.9434	6.17247	15.7144	11.0506	6.51147	15.5897	10.7467	6.24424	15.2492	10.9135	6.43392	15.3931
168	10.9357	6.17847	15.6929	10.8044	6.29463	15.3142	10.5285	6.06065	14.9963	10.702	6.26104	15.1431
169	10.9051	6.20231	15.6079	10.5125	6.05678	14.9682	10.299	5.89392	14.7041	10.4623	6.08633	14.8382
170	10.8457	6.20502	15.4865	10.2283	5.8224	14.6343	10.1048	5.75671	14.4529	10.242	5.92269	14.5612
171	10.6925	6.0906	15.2944	9.89258	5.51137	14.2738	9.8777	5.55497	14.2004	9.98416	5.68828	14.28
172	10.408	5.80973	15.0064	9.46975	5.08361	13.8559	9.56958	5.23264	13.9065	9.65924	5.34736	13.9711
173	9.99166	5.38194	14.6014	9.00566	4.61091	13.4004	9.20495	4.84385	13.566	9.29605	4.95796	13.6341
174	9.34519	4.74167	13.9487	8.37411	3.99374	12.7545	8.6531	4.28973	13.0165	8.74984	4.40699	13.0927
175	8.44387	3.88995	12.9978	7.52897	3.20565	11.8523	7.86434	3.5455	12.1832	7.97605	3.6755	12.2766
176	7.44451	2.96497	11.924	6.61467	2.36742	10.8619	6.96427	2.71755	11.211	7.08704	2.85653	11.3175
177	6.40005	1.96461	10.8355	5.67319	1.46709	9.87929	6.00206	1.8012	10.2029	6.12741	1.94189	10.3129
178	5.32072	0.859863	9.78157	4.69421	0.456106	8.93231	4.96334	0.7429	9.18378	5.07347	0.871756	9.27519
179	4.37673	-0.168524	8.92198	3.80222	-0.531204	8.13564	3.96831	-0.330566	8.26718	4.04763	-0.224342	8.31959
180	3.80117	-0.843985	8.44633	3.2512	-1.19306	7.69545	3.293	-1.1008	7.68679	3.327	-1.0303	7.6843
181	3.47759	-1.20352	8.1587	2.92212	-1.56963	7.41387	2.8221	-1.60879	7.253	2.80083	-1.58636	7.18801
182	3.44019	-1.1769	8.05729	2.84341	-1.59712	7.28393	2.59706	-1.78152	6.97563	2.52106	-1.81213	6.85424
183	3.57923	-0.901294	8.05974	2.91144	-1.40221	7.22509	2.52572	-1.73573	6.78717	2.40311	-1.81779	6.62402
184	3.70643	-0.625508	8.03836	2.96494	-1.19877	7.12864	2.46654	-1.66387	6.59694	2.29897	-1.80071	6.39864
185	3.76148	-0.482464	8.00543	2.98456	-1.08036	7.04948	2.41158	-1.64091	6.46407	2.21729	-1.81445	6.24903
186	3.68341	-0.573475	7.9403	2.89575	-1.16707	6.95856	2.29625	-1.76649	6.35898	2.09471	-1.9516	6.14102
187	3.29567	-1.03531	7.62664	2.55007	-1.5807	6.68085	1.97097	-2.15897	6.10091	1.77343	-2.33661	5.88347
188	2.51166	-1.89228	6.9156	1.85519	-2.35614	6.06652	1.3381	-2.86003	5.53624	1.16651	-3.00346	5.33649
189	1.45518	-2.96767	5.87804	0.908582	-3.34354	5.16071	0.496975	-3.72368	4.71763	0.366223	-3.81871	4.55116
190	0.222324	-4.15967	4.60432	-0.172243	-4.41134	4.06685	-0.463435	-4.6566	3.72973	-0.55097	-4.70476	3.60282
191	-1.01278	-5.31062	3.28506	-1.21947	-5.39881	2.95987	-1.38788	-5.5158	2.74003	-1.42064	-5.51033	2.66904
192	-2.20893	-6.4383	2.02044	-2.24988	-6.37233	1.87257	-2.30757	-6.3801	1.76495	-2.28305	-6.32119	1.75509
193	-3.10688	-7.32179	1.10802	-3.01908	-7.12337	1.08521	-2.98692	-7.04552	1.07168	-2.91115	-6.93871	1.1164
194	-3.65914	-7.91297	0.594703	-3.4607	-7.59324	0.671843	-3.36158	-7.45003	0.726868	-3.25592	-7.3138	0.801963
195	-3.81152	-8.13199	0.508942	-3.53817	-7.7278	0.651465	-3.39323	-7.53633	0.749857	-3.26287	-7.37376	0.848014
196	-3.60191	-8.00278	0.798958	-3.3022	-7.56589	0.961488	-3.12188	-7.33498	1.09123	-2.98252	-7.16186	1.19682
197	-3.05681	-7.52005	1.40643	-2.75873	-7.08242	1.56497	-2.54227	-6.81509	1.73054	-2.41005	-6.64936	1.82927
198	-2.28492	-6.78103	2.21118	-1.99582	-6.35151	2.35988	-1.73979	-6.04983	2.57024	-1.62524	-5.90424	2.65375
199	-1.39739	-5.90861	3.11383	-1.12745	-5.49148	3.23658	-0.820091	-5.1481	3.50791	-0.730088	-5.0302	3.57003
200	-0.491559	-4.98541	4.0023	-0.22003	-4.55609	4.11603	0.145843	-4.16561	4.4573	0.201818	-4.084	4.48764
201	0.245431	-4.22471	4.71558	0.525018	-3.77568	4.82571	0.95019	-3.33128	5.23166
202	0.780032	-3.68255	5.24261	1.10231	-3.17796	5.38258	1.56992	-2.68904	5.82888
203	1.10947	-3.35646	5.57539	1.48884	-2.78203	5.75971	1.96781	-2.27281	6.20844
204	1.12132	-3.34944	5.59208	1.57884	-2.68907	5.84675	2.03249	-2.19414	6.25913
205	0.890344	-3.57429	5.35498	1.40584	-2.85604	5.66771	1.785	-2.42654	5.99654
206	0.450751	-3.98622	4.88772	0.998323	-3.24432	5.24097	1.26274	-2.92486	5.45034
207	-0.217603	-4.60538	4.17017	0.327233	-3.88082	4.53529	0.42683	-3.72604	4.5797
208	-1.04708	-5.3943	3.30014	-0.56968	-4.75371	3.61435	-0.670754	-4.80434	3.46284
209	-1.778	-6.12534	2.56935	-1.46258	-5.65964	2.73448	-1.75808	-5.91347	2.39732
210	-2.57609	-6.99194	1.83976	-2.47226	-6.74244	1.79792	-2.95725	-7.19696	1.28246
211	-3.23893	-7.75957	1.28171	-3.37982	-7.75672	0.997069	-4.02001	-8.37755	0.337537
212	-3.65547	-8.26286	0.951919	-4.07203	-8.53689	0.392835	-4.82192	-9.27684	-0.367008
213	-3.89945	-8.51963	0.720737	-4.55673	-9.03645	-0.0770046	-5.35974	-9.83499	-0.884498
214	-4.14089	-8.68612	0.404342	-4.92917	-9.33076	-0.527573	-5.71698	-10.1131	-1.32085
215	-4.19841	-8.6147	0.217881	-5.03524	-9.29677	-0.773711	-5.74334	-9.99171	-1.49498
216	-4.28182	-8.57472	0.011073	-5.04886	-9.16924	-0.92848	-5.61166	-9.70487	-1.51846
217	-4.47144	-8.71778	-0.225108	-5.04041	-9.09354	-0.987289	-5.42101	-9.43317	-1.40885
218	-4.83506	-9.11063	-0.55949	-5.15017	-9.22185	-1.0785	-5.32518	-9.34753	-1.30283
219	-5.37807	-9.71877	-1.03736	-5.43213	-9.57365	-1.29061	-5.41607	-9.50936	-1.32278
220	-5.85594	-10.2483	-1.46357	-5.67679	-9.88486	-1.46873	-5.51104	-9.67861	-1.34346
221	-6.21975	-10.6042	-1.83528	-5.92633	-10.1435	-1.70913	-5.66357	-9.85182	-1.47532
222	-6.4579	-10.786	-2.12978	-6.20243	-10.3733	-2.03159	-5.92617	-10.0777	-1.77465
223	-6.37396	-10.6348	-2.11315	-6.29054	-10.3986	-2.1825	-6.07435	-10.1679	-1.98078
224	-5.97198	-10.2022	-1.74177	-6.14851	-10.2258	-2.07124	-6.05171	-10.1128	-1.99059
225	-5.30857	-9.55506	-1.06209	-5.79821	-9.89371	-1.70271	-5.8555	-9.931	-1.78
226	-4.40109	-8.69442	-0.107757	-5.16721	-9.31232	-1.0221	-5.38968	-9.51304	-1.26633
227	-3.51046	-7.8352	0.814289	-4.4452	-8.62222	-0.268183	-4.7972	-8.95016	-0.644232
228	-2.77169	-7.09229	1.54891	-3.74272	-7.9099	0.424461	-4.16574	-8.30742	-0.0240628
229	-2.20738	-6.48898	2.07423	-3.05457	-7.16544	1.0563	-3.48374	-7.56702	0.599533
230	-1.91898	-6.15665	2.3187	-2.51975	-6.56456	1.52506	-2.88109	-6.89428	1.13209
231	-1.99672	-6.22378	2.23034	-2.24667	-6.2621	1.76876	-2.47815	-6.45755	1.50125
232	-2.23896	-6.50026	2.02234	-2.1363	-6.1802	1.90759	-2.20167	-6.20892	1.80558
233	-2.6285	-6.96953	1.71253	-2.19488	-6.32677	1.93702	-2.08453	-6.18366	2.01461
234	-3.02431	-7.46673	1.4181	-2.36343	-6.61523	1.88837	-2.09539	-6.3197	2.12892
235	-3.35249	-7.89722	1.19224	-2.60702	-6.97621	1.76217	-2.23966	-6.58454	2.10522
236	-3.66721	-8.28928	0.954867	-2.94849	-7.39872	1.50175	-2.56402	-6.98452	1.85648
237	-3.99618	-8.65347	0.66112	-3.3692	-7.84883	1.11044	-3.05456	-7.49286	1.38375
238	-4.28012	-8.93002	0.369774	-3.80116	-8.2635	0.661176	-3.62777	-8.03637	0.780831
239	-4.72368	-9.32501	-0.122361	-4.38034	-8.78785	0.0271799	-4.41213	-8.76067	-0.0635849
240	-5.38774	-9.89376	-0.881725	-5.12773	-9.44694	-0.808506	-5.40463	-9.67416	-1.1351
241	-6.26532	-10.6684	-1.86227	-6.0284	-10.262	-1.7948	-6.54806	-10.7552	-2.34089
242	-7.36141	-11.6802	-3.0426	-7.07428	-11.2423	-2.90623	-7.79025	-11.9606	-3.61989
243	-8.65599	-12.9427	-4.36929	-8.27368	-12.4186	-4.12873	-9.11394	-13.2841	-4.94378
244	-9.9072	-14.2324	-5.58201	-9.42977	-13.6041	-5.2554	-10.2903	-14.4961	-6.08449
245	-11.0274	-15.4316	-6.62315	-10.4931	-14.7273	-6.25879	-11.2604	-15.5131	-7.0077
246	-11.9514	-16.4174	-7.4855	-11.3936	-15.6707	-7.11663	-11.9697	-16.243	-7.6964
247	-12.5363	-17.0109	-8.06169	-12.0436	-16.3187	-7.76859	-12.3558	-16.6054	-8.10623
248	-12.791	-17.1983	-8.38377	-12.4689	-16.6792	-8.25851	-12.4851	-16.6599	-8.31025
249	-12.6128	-16.9179	-8.30782	-12.5281	-16.6472	-8.40907	-12.2664	-16.3523	-8.18039
250	-12.033	-16.2632	-7.80278	-12.2275	-16.2818	-8.17317	-11.7409	-15.7712	-7.71061
251	-11.0861	-15.3375	-6.83462	-11.5835	-15.6599	-7.50707
252	-9.77935	-14.1522	-5.40655	-10.5734	-14.7591	-6.38773
253	-8.31335	-12.868	-3.75871	-9.33693	-13.6829	-4.99093
254	-6.70752	-11.4292	-1.9858	-7.87265	-12.3631	-3.38217
255	-5.03123	-9.85979	-0.202661	-6.21174	-10.7919	-1.63157
256	-3.5213	-8.37077	1.32816	-4.62227	-9.22007	-0.0244628
257	-2.29766	-7.09711	2.50179	-3.22771	-7.78797	1.33254
258	-1.61679	-6.31355	3.07998	-2.29068	-6.77691	2.19556
259	-1.47139	-6.04006	3.09729	-1.87315	-6.26809	2.52179
260	-2.00662	-6.44717	2.43393	-2.12214	-6.42401	2.17973
261	-3.13512	-7.48995	1.21972	-3.04205	-7.28072	1.19661
262	-4.81171	-9.16616	-0.457254	-4.60244	-8.8444	-0.36048
263	-6.76305	-11.2131	-2.31296	-6.5043	-10.8234	-2.18516
264	-8.78748	-13.3747	-4.20027	-8.59318	-13.0231	-4.16325
265	-10.5789	-15.2916	-5.86618	-10.547	-15.0798	-6.01418
266	-11.9888	-16.7564	-7.22116	-12.1492	-16.7237	-7.57482
267	-12.7931	-17.5367	-8.04948	-13.1749	-17.7232	-8.62666
268	-12.8982	-17.5597	-8.23667	-13.512	-17.9861	-9.03802
269	-12.2871	-16.8647	-7.7096	-13.1084	-17.5125	-8.70432
270	-11.0701	-15.6076	-6.5326	-12.044	-16.426	-7.66199
271	-9.50284	-14.0477	-4.95795	-10.5527	-14.9602	-6.14521
272	-7.76859	-12.3612	-3.17603	-8.83064	-13.2994	-4.36188
273	-6.08487	-10.7179	-1.45182	-7.07277	-11.5894	-2.55617
274	-4.64525	-9.28505	-0.00545307	-5.50102	-10.0236	-0.978447
275	-3.75612	-8.36692	0.854671	-4.39727	-8.88331	0.0887777
276	-3.4345	-7.99412	1.12512	-3.80704	-8.23238	0.618295
277	-3.74104	-8.27438	0.792311	-3.85121	-8.23721	0.534792
278	-4.5533	-9.08941	-0.0172011	-4.41365	-8.78788	-0.0394211
279	-5.78408	-10.3322	-1.23595	-5.4058	-9.77832	-1.03329
280	-7.17046	-11.7261	-2.61479	-6.60051	-10.9662	-2.23478
281	-8.39904	-12.9345	-3.86356	-7.72525	-12.0595	-3.39103
282	-9.36605	-13.869	-4.86312	-8.66537	-12.9593	-4.37147
283	-9.90487	-14.3876	-5.42212	-9.25384	-13.526	-4.98171
284	-9.91955	-14.4171	-5.42202	-9.38101	-13.6706	-5.09147
285	-9.36265	-13.9082	-4.8171	-9.01581	-13.3586	-4.67307
286	-8.28853	-12.8995	-3.67757	-8.19521	-12.6084	-3.78203
287	-7.01546	-11.6685	-2.36244	-7.19257	-11.6525	-2.73262
288	-5.63159	-10.2741	-0.989084	-6.09012	-10.5457	-1.63456
289	-4.40537	-9.0005	0.189762	-5.11514	-9.52577	-0.704505
290	-3.44127	-7.97062	1.08809	-4.38622	-8.73191	-0.0405251
291	-2.87477	-7.35098	1.60144	-4.02359	-8.32114	0.273963
292	-2.77847	-7.23334	1.67639	-4.04748	-8.33783	0.242875
293	-3.13662	-7.5881	1.31485	-4.46895	-8.78014	-0.157755
294	-3.72836	-8.18208	0.725363	-5.08802	-9.43361	-0.742435
295	-4.57028	-9.02734	-0.113214	-5.8972	-10.2765	-1.51794
296	-5.47738	-9.94126	-1.0135	-6.72937	-11.1337	-2.32507
297	-6.3919	-10.8638	-1.91997	-7.53137	-11.9463	-3.11642
298	-7.16905	-11.6381	-2.69998	-8.14434	-12.5516	-3.73706
299	-7.85973	-12.319	-3.40046	-8.62296	-13.0152	-4.23076
300	-8.46513	-12.903	-4.02728	-8.96313	-13.3383	-4.58793
301	-8.98965	-13.4137	-4.56563
302	-9.47445	-13.9235	-5.02543
303	-9.82878	-14.3346	-5.32298
304	-10.0648	-14.6322	-5.49745
305	-10.1698	-14.7731	-5.56647
306	-10.1512	-14.7466	-5.55573
307	-10.0038	-14.5399	-5.46774
308	-9.6841	-14.1454	-5.22279
309	-9.31897	-13.7421	-4.89587
310	-8.9596	-13.392	-4.52719
311	-8.64625	-13.1282	-4.16435
312	-8.56624	-13.0832	-4.04928
313	-8.75083	-13.2472	-4.25445
314	-9.00986	-13.4184	-4.6013
315	-9.32603	-13.6105	-5.04156
316	-9.74377	-13.9298	-5.55773
317	-10.1957	-14.3586	-6.03275
318	-10.5565	-14.7764	-6.33653
319	-10.6939	-15.0057	-6.38202
320	-10.607	-14.9953	-6.2186
321	-10.2816	-14.6929	-5.87031
322	-9.6633	-14.057	-5.26958
323	-8.80331	-13.1651	-4.44155
324	-7.85676	-12.1819	-3.53158
325	-6.90383	-11.2086	-2.59911
326	-6.08912	-10.3798	-1.79846
327	-5.54746	-9.8294	-1.26553
328	-5.4402	-9.72326	-1.15714
329	-5.78282	-10.0898	-1.4759
330	-6.5427	-10.9025	-2.18288
331	-7.68018	-12.1146	-3.24572
332	-9.03955	-13.5554	-4.52366
333	-10.4165	-14.9934	-5.83956
334	-11.5106	-16.1237	-6.89746
335	-12.1046	-16.7396	-7.46946
336	-12.1797	-16.8362	-7.52319
337	-11.5746	-16.2462	-6.90303
338	-10.4143	-15.0965	-5.73202
339	-8.8931	-13.5655	-4.22073
340	-7.11256	-11.7369	-2.48822
341	-5.39333	-9.9384	-0.848258
342	-4.00054	-8.45547	0.454385
343	-3.05172	-7.40949	1.30605
344	-2.62501	-6.90685	1.65683
345	-2.76508	-7.00649	1.47633
346	-3.50685	-7.74018	0.726473
347	-4.49748	-8.77348	-0.221479
348	-5.56843	-9.9212	-1.21567
349	-6.58086	-11.0243	-2.13742
350	-7.30391	-11.8431	-2.76473

## Sheet: Panel_E
hEyePosRight_Mean	vEyePosRight_Mean	hEyePosLeft_Mean	vEyePosLeft_Mean
-1.22501	-0.0556528	-1.14787	-0.00404697
-1.18324	-0.0343228	-1.02328	0.0060075
-1.12971	-0.0215935	-1.00297	0.0100033
-1.17179	-0.0295558	-1.06055	0.0191682
-1.16317	-0.0504448	-0.994954	0.0275732
-1.06784	-0.0315695	-0.987827	0.0104835
-1.13667	-0.0307759	-1.06929	-0.00954944
-1.14677	-0.0460975	-0.967429	0.00625097
-1.05165	-0.0497289	-0.927061	0.021484
-1.05969	-0.0326858	-0.979073	0.0153482
-1.0921	-0.041671	-0.937438	-0.00641947
-0.995992	-0.0145202	-0.881492	0.00108196
-0.973141	-0.0174386	-0.97555	-0.00583636
-0.996086	-0.019241	-0.88942	-0.00665479
-0.956081	-0.0333648	-0.819157	-0.0135317
-0.983849	-0.0190795	-0.909948	-0.0217768
-1.00059	-0.012726	-0.8507	-0.0104186
-0.932352	-0.00725114	-0.792208	-0.0223677
-0.896658	-0.023317	-0.858162	-0.0364707
-0.942345	-0.0369815	-0.821897	-0.0416195
-0.906973	-0.0373699	-0.765389	-0.0405662
-0.897644	-0.0496091	-0.818334	-0.0460416
-0.931387	-0.0545062	-0.804223	-0.0537042
-0.902759	-0.0583591	-0.770335	-0.0429261
-0.862589	-0.0489793	-0.827116	-0.0457342
-0.881121	-0.0676338	-0.788544	-0.0434832
-0.854414	-0.0542967	-0.720459	-0.0319052
-0.812135	-0.0448921	-0.782134	-0.0601721
-0.822082	-0.0381557	-0.779483	-0.0555883
-0.815175	-0.0447613	-0.70103	-0.0333036
-0.784766	-0.0484244	-0.747722	-0.0437502
-0.793636	-0.0551322	-0.739276	-0.0496913
-0.7567	-0.0570196	-0.655257	-0.0440595
-0.742719	-0.056227	-0.711934	-0.057172
-0.775271	-0.0539037	-0.709395	-0.0728331
-0.758435	-0.0631146	-0.572259	-0.0638022
-0.725733	-0.0638614	-0.610557	-0.0560956
-0.742589	-0.0731169	-0.650813	-0.0590315
-0.711609	-0.0677564	-0.524149	-0.0365665
-0.694977	-0.0533981	-0.553948	-0.04426
-0.727882	-0.0506367	-0.584962	-0.0674068
-0.73326	-0.040822	-0.532871	-0.0831969
-0.666717	-0.0552257	-0.566205	-0.0627275
-0.674455	-0.0689067	-0.611043	-0.0642535
-0.683528	-0.0803258	-0.501509	-0.0782233
-0.636675	-0.0825541	-0.514402	-0.0903061
-0.641874	-0.102004	-0.584755	-0.1041
-0.680699	-0.0941336	-0.470164	-0.0753722
-0.618075	-0.0742512	-0.427279	-0.0683741
-0.617541	-0.0908901	-0.523608	-0.063796
-0.616275	-0.0812191	-0.501338	-0.0672392
-0.565137	-0.0679002	-0.434009	-0.0692761
-0.562126	-0.0740353	-0.504381	-0.0776718
-0.579029	-0.0919127	-0.455893	-0.073174
-0.564188	-0.109892	-0.376168	-0.0740172
-0.568651	-0.10045	-0.441104	-0.0631332
-0.571591	-0.0855932	-0.452291	-0.0565753
-0.507054	-0.0986353	-0.389371	-0.0595886
-0.485154	-0.116943	-0.447575	-0.0822924
-0.477026	-0.0941115	-0.494939	-0.09973
-0.469039	-0.0920556	-0.414456	-0.109318
-0.451868	-0.0965931	-0.398923	-0.0988119
-0.460576	-0.085234	-0.402549	-0.0877846
-0.458694	-0.131203	-0.348187	-0.0734163
-0.466681	-0.1147	-0.308135	-0.0660925
-0.42455	-0.111448	-0.342146	-0.0471835
-0.415468	-0.112022	-0.318681	-0.0695368
-0.414134	-0.0974274	-0.284451	-0.0582552
-0.405566	-0.0879095	-0.292308	-0.0591679
-0.393794	-0.0794843	-0.270123	-0.0638163
-0.396245	-0.103256	-0.247597	-0.068501
-0.360453	-0.109768	-0.258817	-0.0608231
-0.357872	-0.106461	-0.274032	-0.0617538
-0.367966	-0.0875292	-0.233331	-0.0762286
-0.31343	-0.0639185	-0.256271	-0.0511385
-0.266927	-0.0642637	-0.282608	-0.038358
-0.293586	-0.0682221	-0.238593	-0.0395693
-0.313048	-0.0636958	-0.190058	-0.044832
-0.291934	-0.0681126	-0.228433	-0.0738208
-0.299882	-0.0571008	-0.209605	-0.0699826
-0.267017	-0.0730656	-0.187601	-0.0593212
-0.22947	-0.0719224	-0.201112	-0.0566329
-0.264868	-0.0702104	-0.160349	-0.0367372
-0.244548	-0.0655648	-0.118118	-0.0212138
-0.203536	-0.059874	-0.104331	-0.00924035
-0.227267	-0.0720923	-0.160506	-0.03493
-0.247061	-0.0844754	-0.112384	-0.0311785
-0.194438	-0.0791341	-0.0940735	-0.0455022
-0.189384	-0.071203	-0.141693	-0.0579009
-0.231765	-0.0667895	-0.122634	-0.0359472
-0.171745	-0.0389055	-0.0978893	-0.0138288
-0.171588	-0.0429534	-0.105868	-0.0192021
-0.22095	-0.0482347	-0.110076	-0.0236649
-0.135555	-0.0345322	-0.0897249	-0.0399682
-0.11079	-0.0529897	-0.101162	-0.0403524
-0.164242	-0.0587349	-0.0976819	-0.0125854
-0.136887	-0.0549139	-0.0846951	0.000327297
-0.0623779	-0.0360072	-0.0327991	-0.00620564
-0.14257	-0.0211723	-0.0281851	-0.0309227
-0.1141	-0.0109838	-0.0342881	-0.0198132
0	0	0	0
-0.0595228	-0.0163945	-0.0273867	0.00611927
-0.0810893	-0.0274342	-0.0693657	-0.0100855
-0.01929	-0.0173149	-0.0498636	-0.0124491
-0.070648	-0.0314879	-0.0202342	-0.0168232
-0.0642603	-0.0366455	-0.0371834	-0.00530588
0.040552	-0.0167877	0.0365126	-0.000608781
0.00487556	-0.0115248	0.11661	0.0249906
-0.0193748	-0.00241425	0.0496772	0.0187338
0.0399295	-0.000819467	0.0592823	0.0159009
0.0179502	-0.0104949	0.17205	0.0112691
-0.01297	-0.020198	0.137976	0.0178349
0.0383354	-0.0235898	0.0387344	0.0104247
0.0456916	-0.0132295	0.121834	0.0252687
0.0263311	-0.0212398	0.150283	0.00794639
0.107939	-0.020208	0.0406247	-0.0183221
0.133654	-0.0328993	0.176409	0.0134422
0.079062	-0.0402657	0.202396	0.00585323
0.0987053	-0.0304975	0.102072	0.00292779
0.106281	-0.0412521	0.130332	-0.0254016
0.0552541	-0.0733334	0.196856	-0.0299431
0.162007	-0.0513163	0.115354	-0.0323594
0.187986	-0.0513023	0.146008	-0.0411079
0.117422	-0.032308	0.269594	-0.0236498
0.169965	-0.0467995	0.18972	-0.0199497
0.191259	-0.0567195	0.163785	-0.0187198
0.141558	-0.0615984	0.260119	0.0111222
0.177741	-0.065686	0.230555	-0.002002
0.256203	-0.0356473	0.162623	-0.00773711
0.168171	-0.0584211	0.264199	0.0210544
0.194431	-0.0448843	0.25521	0.0217573
0.263398	-0.0279269	0.179451	0.0152927
0.194298	-0.0276833	0.293474	0.00561711
0.197674	-0.0391733	0.312199	0.0218693
0.277333	-0.0386257	0.165105	-0.00255207
0.198857	-0.0358038	0.247515	0.0046603
0.204641	-0.0113395	0.299539	0.00138861
0.310486	-0.0133405	0.251866	-0.000949848
0.261784	-0.0280614	0.266676	-0.000642661
0.254396	-0.0192023	0.37388	0.0293817
0.341677	-0.00376927	0.294483	-0.000632871
0.322766	-0.017915	0.267388	-0.0144757
0.267928	-0.0276841	0.348554	-0.00848184
0.369635	-0.0133932	0.332765	7.61908e-05
0.342359	-0.034423	0.301052	-0.0058753
0.306202	-0.0361968	0.361458	0.00344691
0.399774	-0.040004	0.386879	0.00753018
0.405532	-0.0333934	0.280418	-0.0336533
0.335903	-0.0503012	0.32522	-0.0174896
0.401039	-0.0334131	0.387223	-0.0202021
0.413046	-0.0387986	0.375425	-0.0189683
0.332997	-0.0508453	0.375407	-0.0391797
0.392767	-0.0461124	0.375358	-0.019791
0.459449	-0.0397697	0.379831	-0.0203347
0.385935	-0.0692275	0.34752	-0.0520815
0.409028	-0.0752279	0.35942	-0.0478469
0.507149	-0.0527195	0.382067	-0.0582136
0.435847	-0.0422109	0.375114	-0.0415479
0.470277	-0.0443608	0.380297	-0.0366066
0.530031	-0.076644	0.451456	-0.0273621
0.427633	-0.106377	0.438665	-0.0443161
0.451421	-0.0771393	0.430597	-0.0569354
0.525479	-0.0421573	0.430538	-0.0853088
0.47087	-0.0776154	0.430381	-0.0712602
0.464154	-0.0845654	0.382555	-0.0767285
0.521005	-0.102577	0.419644	-0.0663741
0.486733	-0.144082	0.479275	-0.0487731
0.475875	-0.121949	0.457739	-0.0692295
0.500207	-0.110573	0.49226	-0.0778201
0.525777	-0.117624	0.493184	-0.103913
0.516281	-0.123191	0.441745	-0.101047
0.565146	-0.108001	0.432216	-0.095554
0.565476	-0.104361	0.508345	-0.0954824
0.519384	-0.110063	0.466567	-0.112425
0.539572	-0.106935	0.430326	-0.12409
0.549496	-0.131205	0.496129	-0.113385
0.489256	-0.136611	0.505853	-0.10397
0.53293	-0.104097	0.390033	-0.137573
0.493909	-0.104397	0.417704	-0.149012
0.482521	-0.0895352	0.468874	-0.135702
0.509459	-0.0657183	0.368657	-0.142419
0.519268	-0.061063	0.366529	-0.127811
0.481657	-0.0728211	0.481068	-0.108996
0.522787	-0.0533679	0.418285	-0.12529
0.576554	-0.028348	0.320782	-0.111482
0.564266	-0.0174592	0.439204	-0.0778
0.534169	0.00223766	0.448391	-0.073715
0.530857	0.0232179	0.319315	-0.0644731
0.512376	0.0242047	0.415697	-0.0316857
0.50057	0.0551121	0.440507	-0.0159016
0.49114	0.0867566	0.316571	-0.0183064
0.454368	0.0963939	0.349762	0.0183379
0.463534	0.152183	0.420651	0.0463658
0.460731	0.167632	0.279921	0.0728163
0.416451	0.198401	0.273054	0.122725
0.411007	0.230095	0.349733	0.153308
0.431473	0.277345	0.261287	0.168803
0.418485	0.302	0.204008	0.184951
0.445966	0.354354	0.327099	0.249124
0.43657	0.380216	0.302911	0.295085
0.418732	0.41089	0.211434	0.299524
0.352487	0.402499	0.285542	0.33165
0.372911	0.449225	0.248963	0.371721
0.401612	0.499088	0.109716	0.379271
0.367873	0.530901	0.193949	0.446495
0.418738	0.592554	0.243141	0.509391
0.420195	0.635808	0.129593	0.50007
0.385969	0.663014	0.111886	0.526177
0.36765	0.662099	0.204706	0.576972
0.41445	0.718363	0.141421	0.610633
0.366714	0.739677	0.103394	0.643408
0.362119	0.788843	0.151529	0.682971
0.403942	0.830793	0.0897951	0.693455
0.377729	0.856548	0.0281175	0.70013
0.337824	0.886471	0.105055	0.747193
0.35158	0.913835	0.08761	0.769764
0.370991	0.949091	0.052342	0.809631
0.351418	0.99432	0.0863784	0.864707
0.36799	1.04045	0.114289	0.88401
0.372309	1.0521	0.0423036	0.896086
0.357532	1.07077	0.0115124	0.944894
0.351645	1.08765	0.0710669	0.989856
0.347332	1.10523	0.0256762	0.986307
0.340029	1.12121	-0.0109979	1.00193
0.34113	1.16652	0.0107483	0.995944
0.341967	1.19395	0.0214754	1.01703
0.307701	1.18663	-0.0357356	1.04304
0.280681	1.2231	-0.0201774	1.06277
0.355591	1.27362	-0.0564732	1.07488
0.308852	1.27188	-0.0732715	1.09833
0.284541	1.29369	-0.0652622	1.1471
0.340594	1.32513	-0.0116555	1.18063
0.329945	1.32144	-0.0465465	1.17868
0.301226	1.36171	-0.117104	1.19562
0.323961	1.38052	-0.0599209	1.25568
0.322103	1.40967	-0.0479734	1.26429
0.291889	1.43964	-0.111222	1.27923
0.320798	1.47797	-0.137688	1.27116
0.326037	1.49255	-0.108432	1.30231
0.256037	1.47066	-0.211354	1.3017
0.256062	1.469	-0.216176	1.34276
0.285856	1.50336	-0.136422	1.35198
0.286994	1.51556	-0.17046	1.37101
0.261971	1.53478	-0.243022	1.38212
0.278124	1.55635	-0.153674	1.40546
0.309799	1.57369	-0.144134	1.43461
0.301465	1.5789	-0.230369	1.4352
0.31445	1.62162	-0.15314	1.44784
0.294888	1.61438	-0.12553	1.45385
0.24021	1.60633	-0.239285	1.46451
0.264072	1.63818	-0.219436	1.49445
0.253716	1.65893	-0.148001	1.52604
0.296419	1.67599	-0.247588	1.54469
0.285099	1.67193	-0.262488	1.54337
0.301587	1.69292	-0.236403	1.53091
0.294875	1.69598	-0.269631	1.55185
0.296462	1.71331	-0.297969	1.56023
0.311852	1.72355	-0.161822	1.59341
0.317924	1.72646	-0.192032	1.60395
0.32143	1.73736	-0.250283	1.63073
0.348984	1.74273	-0.163233	1.63876
0.325622	1.7293	-0.164042	1.63958
0.317914	1.73119	-0.255412	1.64605
0.356564	1.77825	-0.213866	1.65029
0.349634	1.80709	-0.132616	1.69196
0.322663	1.79223	-0.209249	1.67984
0.342924	1.79508	-0.212141	1.66814
0.376834	1.80712	-0.118299	1.66775
0.383909	1.83254	-0.16041	1.69627
0.389874	1.85625	-0.176848	1.70876
0.39568	1.83923	-0.0933875	1.71818
0.390137	1.84132	-0.11675	1.70946
0.382129	1.85433	-0.159601	1.70084
0.417537	1.88183	-0.140716	1.72219
0.409682	1.88317	-0.117719	1.74835
0.387153	1.88578	-0.1381	1.74725
0.446155	1.90588	-0.0810342	1.74739
0.489848	1.93724	-0.0194199	1.76511
0.494538	1.90348	-0.0499633	1.77847
0.48673	1.90662	-0.0453407	1.76916
0.473201	1.91885	-0.0319067	1.77035
0.505076	1.93227	-0.00408793	1.784
0.531352	1.9352	-0.0444247	1.78049
0.510145	1.91871	0.0353814	1.77453
0.504002	1.9165	0.0609044	1.77695
0.542349	1.92728	-0.00338146	1.76807
0.567279	1.942	0.000691233	1.75681
0.536917	1.9301	0.0867476	1.76576
0.589057	1.93974	0.0192431	1.76426
0.600218	1.95658	-0.0345663	1.75689
0.558484	1.94736	0.0594103	1.77551
0.551219	1.93546	0.0813084	1.78503
0.594094	1.93515	0.0302707	1.74932
0.606085	1.94299	0.134391	1.74595
0.640481	1.91796	0.170789	1.75316
0.660518	1.93034	0.0665596	1.75551
0.603526	1.9245	0.135386	1.76186
0.62777	1.91802	0.169423	1.75755
0.658757	1.92723	0.107533	1.7354
0.666701	1.92946	0.14859	1.73726
0.647447	1.89708	0.235133	1.7283

## Sheet: Panel_F
time	hEyePosRight_Mean	hEyePosRight_95ci_low	hEyePosRight_95ci_up	hEyePosLeft_Mean	hEyePosLeft_95ci_low	hEyePosLeft_95ci_up
-100	-1.22501	-1.38828	-1.06175	-1.14787	-1.32337	-0.97238
-99	-1.18324	-1.33443	-1.03206	-1.02328	-1.19321	-0.85335
-98	-1.12971	-1.28827	-0.971158	-1.00297	-1.16935	-0.83659
-97	-1.17179	-1.33044	-1.01314	-1.06055	-1.23237	-0.888725
-96	-1.16317	-1.31799	-1.00836	-0.994954	-1.1602	-0.829705
-95	-1.06784	-1.21957	-0.91612	-0.987827	-1.15334	-0.822311
-94	-1.13667	-1.29475	-0.978593	-1.06929	-1.23416	-0.904416
-93	-1.14677	-1.29456	-0.99899	-0.967429	-1.13561	-0.799245
-92	-1.05165	-1.1966	-0.906714	-0.927061	-1.08642	-0.767706
-91	-1.05969	-1.21005	-0.909323	-0.979073	-1.13839	-0.819754
-90	-1.0921	-1.24507	-0.939129	-0.937438	-1.09699	-0.777883
-89	-0.995992	-1.14532	-0.846667	-0.881492	-1.0383	-0.724687
-88	-0.973141	-1.12147	-0.824813	-0.97555	-1.13051	-0.820585
-87	-0.996086	-1.14844	-0.843735	-0.88942	-1.05339	-0.725449
-86	-0.956081	-1.10392	-0.80824	-0.819157	-0.98228	-0.656034
-85	-0.983849	-1.12827	-0.839424	-0.909948	-1.06267	-0.757226
-84	-1.00059	-1.14623	-0.854949	-0.8507	-1.00644	-0.694961
-83	-0.932352	-1.07902	-0.78568	-0.792208	-0.949141	-0.635275
-82	-0.896658	-1.03321	-0.760102	-0.858162	-1.00488	-0.711443
-81	-0.942345	-1.08168	-0.803015	-0.821897	-0.971885	-0.671909
-80	-0.906973	-1.05192	-0.762025	-0.765389	-0.923019	-0.60776
-79	-0.897644	-1.03726	-0.758027	-0.818334	-0.96597	-0.670699
-78	-0.931387	-1.07027	-0.792502	-0.804223	-0.95033	-0.658115
-77	-0.902759	-1.05057	-0.754946	-0.770335	-0.929785	-0.610885
-76	-0.862589	-1.00409	-0.721092	-0.827116	-0.974853	-0.67938
-75	-0.881121	-1.01004	-0.752201	-0.788544	-0.926732	-0.650356
-74	-0.854414	-0.995343	-0.713485	-0.720459	-0.869596	-0.571322
-73	-0.812135	-0.946849	-0.677422	-0.782134	-0.92975	-0.634519
-72	-0.822082	-0.944989	-0.699174	-0.779483	-0.915744	-0.643222
-71	-0.815175	-0.952142	-0.678209	-0.70103	-0.850599	-0.551462
-70	-0.784766	-0.929197	-0.640335	-0.747722	-0.895259	-0.600186
-69	-0.793636	-0.921196	-0.666077	-0.739276	-0.871765	-0.606787
-68	-0.7567	-0.888362	-0.625037	-0.655257	-0.794975	-0.515539
-67	-0.742719	-0.882344	-0.603095	-0.711934	-0.857031	-0.566837
-66	-0.775271	-0.899305	-0.651237	-0.709395	-0.839563	-0.579227
-65	-0.758435	-0.883308	-0.633561	-0.572259	-0.709787	-0.43473
-64	-0.725733	-0.86779	-0.583676	-0.610557	-0.760189	-0.460926
-63	-0.742589	-0.87066	-0.614517	-0.650813	-0.783412	-0.518214
-62	-0.711609	-0.827967	-0.595252	-0.524149	-0.650762	-0.397536
-61	-0.694977	-0.831779	-0.558175	-0.553948	-0.695317	-0.412578
-60	-0.727882	-0.861244	-0.59452	-0.584962	-0.71821	-0.451713
-59	-0.73326	-0.847946	-0.618574	-0.532871	-0.650662	-0.41508
-58	-0.666717	-0.79988	-0.533554	-0.566205	-0.701897	-0.430513
-57	-0.674455	-0.808041	-0.540869	-0.611043	-0.743564	-0.478523
-56	-0.683528	-0.796393	-0.570663	-0.501509	-0.619452	-0.383566
-55	-0.636675	-0.763349	-0.510001	-0.514402	-0.644707	-0.384097
-54	-0.641874	-0.779153	-0.504595	-0.584755	-0.716362	-0.453149
-53	-0.680699	-0.795802	-0.565596	-0.470164	-0.586606	-0.353723
-52	-0.618075	-0.735152	-0.500998	-0.427279	-0.54698	-0.307579
-51	-0.617541	-0.753538	-0.481544	-0.523608	-0.652479	-0.394738
-50	-0.616275	-0.732465	-0.500086	-0.501338	-0.612609	-0.390066
-49	-0.565137	-0.676579	-0.453694	-0.434009	-0.548467	-0.319552
-48	-0.562126	-0.691939	-0.432314	-0.504381	-0.633806	-0.374956
-47	-0.579029	-0.694863	-0.463195	-0.455893	-0.574102	-0.337684
-46	-0.564188	-0.668033	-0.460342	-0.376168	-0.488322	-0.264014
-45	-0.568651	-0.693423	-0.44388	-0.441104	-0.567887	-0.31432
-44	-0.571591	-0.690404	-0.452777	-0.452291	-0.570153	-0.334429
-43	-0.507054	-0.609908	-0.404199	-0.389371	-0.501095	-0.277648
-42	-0.485154	-0.60514	-0.365169	-0.447575	-0.570242	-0.324908
-41	-0.477026	-0.596752	-0.357299	-0.494939	-0.611202	-0.378675
-40	-0.469039	-0.57169	-0.366389	-0.414456	-0.517513	-0.311399
-39	-0.451868	-0.569351	-0.334386	-0.398923	-0.513476	-0.28437
-38	-0.460576	-0.58061	-0.340541	-0.402549	-0.519968	-0.285129
-37	-0.458694	-0.559551	-0.357838	-0.348187	-0.449672	-0.246702
-36	-0.466681	-0.575871	-0.357492	-0.308135	-0.419158	-0.197111
-35	-0.42455	-0.543275	-0.305825	-0.342146	-0.451891	-0.2324
-34	-0.415468	-0.517099	-0.313837	-0.318681	-0.415232	-0.222129
-33	-0.414134	-0.520302	-0.307966	-0.284451	-0.393939	-0.174963
-32	-0.405566	-0.515268	-0.295864	-0.292308	-0.401512	-0.183105
-31	-0.393794	-0.488439	-0.299149	-0.270123	-0.366886	-0.17336
-30	-0.396245	-0.501303	-0.291188	-0.247597	-0.357349	-0.137845
-29	-0.360453	-0.467778	-0.253127	-0.258817	-0.36541	-0.152224
-28	-0.357872	-0.455597	-0.260147	-0.274032	-0.365786	-0.182278
-27	-0.367966	-0.47139	-0.264542	-0.233331	-0.341159	-0.125502
-26	-0.31343	-0.416348	-0.210513	-0.256271	-0.360728	-0.151815
-25	-0.266927	-0.367197	-0.166658	-0.282608	-0.369534	-0.195682
-24	-0.293586	-0.39767	-0.189502	-0.238593	-0.343245	-0.133942
-23	-0.313048	-0.416964	-0.209132	-0.190058	-0.294816	-0.0852993
-22	-0.291934	-0.386298	-0.19757	-0.228433	-0.312549	-0.144316
-21	-0.299882	-0.402005	-0.197758	-0.209605	-0.314571	-0.104639
-20	-0.267017	-0.372168	-0.161867	-0.187601	-0.302276	-0.0729269
-19	-0.22947	-0.314792	-0.144148	-0.201112	-0.288639	-0.113586
-18	-0.264868	-0.365173	-0.164563	-0.160349	-0.260116	-0.0605823
-17	-0.244548	-0.350556	-0.138539	-0.118118	-0.234125	-0.00211206
-16	-0.203536	-0.284739	-0.122334	-0.104331	-0.185329	-0.0233334
-15	-0.227267	-0.325442	-0.129093	-0.160506	-0.259071	-0.0619414
-14	-0.247061	-0.352511	-0.141612	-0.112384	-0.229722	0.00495453
-13	-0.194438	-0.270304	-0.118571	-0.0940735	-0.171405	-0.0167424
-12	-0.189384	-0.281005	-0.0977641	-0.141693	-0.225412	-0.0579733
-11	-0.231765	-0.341463	-0.122067	-0.122634	-0.240244	-0.00502419
-10	-0.171745	-0.25146	-0.0920302	-0.0978893	-0.183949	-0.0118301
-9	-0.171588	-0.251685	-0.0914913	-0.105868	-0.18154	-0.0301951
-8	-0.22095	-0.334183	-0.107716	-0.110076	-0.225728	0.00557724
-7	-0.135555	-0.225521	-0.0455884	-0.0897249	-0.183378	0.00392817
-6	-0.11079	-0.183833	-0.037747	-0.101162	-0.17145	-0.0308738
-5	-0.164242	-0.275942	-0.0525416	-0.0976819	-0.213957	0.0185932
-4	-0.136887	-0.229033	-0.0447416	-0.0846951	-0.179619	0.0102287
-3	-0.0623779	-0.124592	-0.000164023	-0.0327991	-0.0915597	0.0259616
-2	-0.14257	-0.248284	-0.0368565	-0.0281851	-0.130447	0.0740766
-1	-0.1141	-0.198071	-0.030129	-0.0342881	-0.12875	0.060174
0	0	0	0	0	0	0
1	-0.0595228	-0.153116	0.0340704	-0.0273867	-0.120685	0.0659115
2	-0.0810893	-0.178809	0.0166303	-0.0693657	-0.176673	0.0379418
3	-0.01929	-0.0758641	0.0372842	-0.0498636	-0.111594	0.0118663
4	-0.070648	-0.167315	0.0260195	-0.0202342	-0.117338	0.0768697
5	-0.0642603	-0.169016	0.040495	-0.0371834	-0.15116	0.076793
6	0.040552	-0.0273626	0.108467	0.0365126	-0.0336208	0.106646
7	0.00487556	-0.0865139	0.0962651	0.11661	0.0235696	0.20965
8	-0.0193748	-0.127789	0.0890395	0.0496772	-0.0702835	0.169638
9	0.0399295	-0.0376878	0.117547	0.0592823	-0.0204079	0.138973
10	0.0179502	-0.0689702	0.104871	0.17205	0.0790879	0.265013
11	-0.01297	-0.120568	0.094628	0.137976	0.0218857	0.254066
12	0.0383354	-0.0470246	0.123695	0.0387344	-0.0430718	0.120541
13	0.0456916	-0.033576	0.124959	0.121834	0.0389319	0.204736
14	0.0263311	-0.0768301	0.129492	0.150283	0.0378971	0.262669
15	0.107939	0.0186718	0.197207	0.0406247	-0.0541964	0.135446
16	0.133654	0.0503283	0.216979	0.176409	0.0908991	0.261919
17	0.079062	-0.0231484	0.181272	0.202396	0.0935601	0.311233
18	0.0987053	0.0001708	0.19724	0.102072	0.00862545	0.195519
19	0.106281	0.0237278	0.188834	0.130332	0.0448588	0.215805
20	0.0552541	-0.040808	0.151316	0.196856	0.0884145	0.305297
21	0.162007	0.0620959	0.261918	0.115354	0.014573	0.216135
22	0.187986	0.101822	0.27415	0.146008	0.0540553	0.237961
23	0.117422	0.0203626	0.214482	0.269594	0.161438	0.377751
24	0.169965	0.0698368	0.270093	0.18972	0.0830324	0.296408
25	0.191259	0.100914	0.281603	0.163785	0.0719696	0.2556
26	0.141558	0.0431438	0.239972	0.260119	0.153032	0.367206
27	0.177741	0.0812724	0.27421	0.230555	0.124244	0.336865
28	0.256203	0.160223	0.352183	0.162623	0.0655073	0.259739
29	0.168171	0.0668675	0.269475	0.264199	0.153354	0.375044
30	0.194431	0.100543	0.28832	0.25521	0.148241	0.362179
31	0.263398	0.164543	0.362253	0.179451	0.0771121	0.28179
32	0.194298	0.089685	0.298911	0.293474	0.178509	0.40844
33	0.197674	0.103586	0.291762	0.312199	0.206167	0.418231
34	0.277333	0.179568	0.375097	0.165105	0.0647796	0.26543
35	0.198857	0.0923357	0.305378	0.247515	0.135969	0.359061
36	0.204641	0.104342	0.30494	0.299539	0.188586	0.410491
37	0.310486	0.214889	0.406083	0.251866	0.146307	0.357424
38	0.261784	0.150388	0.37318	0.266676	0.150751	0.382602
39	0.254396	0.149005	0.359788	0.37388	0.26072	0.48704
40	0.341677	0.247702	0.435651	0.294483	0.191245	0.397722
41	0.322766	0.210863	0.434669	0.267388	0.147655	0.387121
42	0.267928	0.164786	0.371069	0.348554	0.231896	0.465211
43	0.369635	0.277639	0.46163	0.332765	0.227789	0.437741
44	0.342359	0.233259	0.451459	0.301052	0.182704	0.419401
45	0.306202	0.195703	0.416702	0.361458	0.239589	0.483326
46	0.399774	0.304116	0.495431	0.386879	0.281275	0.492483
47	0.405532	0.295667	0.515397	0.280418	0.161942	0.398894
48	0.335903	0.220225	0.451581	0.32522	0.200518	0.449923
49	0.401039	0.30587	0.496209	0.387223	0.27861	0.495836
50	0.413046	0.307673	0.518419	0.375425	0.262049	0.488801
51	0.332997	0.214835	0.451159	0.375407	0.254718	0.496096
52	0.392767	0.29048	0.495054	0.375358	0.259643	0.491072
53	0.459449	0.36097	0.557927	0.379831	0.26547	0.494192
54	0.385935	0.269296	0.502574	0.34752	0.217207	0.477834
55	0.409028	0.304498	0.513557	0.35942	0.239357	0.479483
56	0.507149	0.406765	0.607533	0.382067	0.270547	0.493587
57	0.435847	0.315618	0.556076	0.375114	0.243523	0.506705
58	0.470277	0.356404	0.584151	0.380297	0.249213	0.51138
59	0.530031	0.429281	0.630781	0.451456	0.330193	0.57272
60	0.427633	0.306435	0.548831	0.438665	0.306355	0.570974
61	0.451421	0.331319	0.571523	0.430597	0.29334	0.567855
62	0.525479	0.423639	0.627319	0.430538	0.310641	0.550435
63	0.47087	0.357131	0.584608	0.430381	0.297669	0.563094
64	0.464154	0.34491	0.583399	0.382555	0.243304	0.521807
65	0.521005	0.41546	0.626551	0.419644	0.292084	0.547204
66	0.486733	0.373185	0.600281	0.479275	0.348328	0.610221
67	0.475875	0.350995	0.600755	0.457739	0.315584	0.599895
68	0.500207	0.392331	0.608082	0.49226	0.357956	0.626563
69	0.525777	0.421506	0.630047	0.493184	0.364747	0.621621
70	0.516281	0.391975	0.640586	0.441745	0.301301	0.582188
71	0.565146	0.446207	0.684086	0.432216	0.293725	0.570706
72	0.565476	0.457804	0.673148	0.508345	0.378593	0.638098
73	0.519384	0.396751	0.642017	0.466567	0.324253	0.608882
74	0.539572	0.4138	0.665345	0.430326	0.288701	0.571951
75	0.549496	0.434695	0.664297	0.496129	0.368962	0.623297
76	0.489256	0.372092	0.606419	0.505853	0.367463	0.644243
77	0.53293	0.408809	0.657051	0.390033	0.247205	0.532861
78	0.493909	0.379705	0.608113	0.417704	0.288242	0.547166
79	0.482521	0.36643	0.598612	0.468874	0.334818	0.602931
80	0.509459	0.381812	0.637106	0.368657	0.221242	0.516072
81	0.519268	0.399995	0.638542	0.366529	0.229727	0.503331
82	0.481657	0.365453	0.597862	0.481068	0.346411	0.615725
83	0.522787	0.392793	0.652781	0.418285	0.268443	0.568127
84	0.576554	0.449259	0.703849	0.320782	0.176902	0.464661
85	0.564266	0.444818	0.683713	0.439204	0.303694	0.574714
86	0.534169	0.403323	0.665015	0.448391	0.302089	0.594693
87	0.530857	0.399922	0.661793	0.319315	0.171886	0.466744
88	0.512376	0.389564	0.635188	0.415697	0.274674	0.55672
89	0.50057	0.372261	0.628879	0.440507	0.292308	0.588706
90	0.49114	0.357916	0.624364	0.316571	0.16705	0.466093
91	0.454368	0.331316	0.577419	0.349762	0.202832	0.496692
92	0.463534	0.337938	0.589131	0.420651	0.272188	0.569114
93	0.460731	0.322729	0.598733	0.279921	0.125918	0.433924
94	0.416451	0.287819	0.545084	0.273054	0.125374	0.420735
95	0.411007	0.284559	0.537455	0.349733	0.203539	0.495928
96	0.431473	0.294004	0.568942	0.261287	0.109981	0.412593
97	0.418485	0.286428	0.550541	0.204008	0.0571238	0.350892
98	0.445966	0.315717	0.576216	0.327099	0.176918	0.477279
99	0.43657	0.29892	0.574221	0.302911	0.151031	0.454791
100	0.418732	0.277365	0.5601	0.211434	0.0630496	0.359819
101	0.352487	0.215445	0.48953	0.285542	0.137976	0.433109
102	0.372911	0.236437	0.509386	0.248963	0.0948466	0.403079
103	0.401612	0.260719	0.542504	0.109716	-0.0397076	0.259139
104	0.367873	0.229414	0.506333	0.193949	0.0430282	0.344871
105	0.418738	0.282609	0.554868	0.243141	0.0874001	0.398881
106	0.420195	0.279199	0.561191	0.129593	-0.0256655	0.284851
107	0.385969	0.246544	0.525394	0.111886	-0.0472699	0.271042
108	0.36765	0.232229	0.503071	0.204706	0.0513702	0.358043
109	0.41445	0.275527	0.553373	0.141421	-0.00927701	0.292119
110	0.366714	0.217374	0.516054	0.103394	-0.0555957	0.262384
111	0.362119	0.220181	0.504057	0.151529	-0.00658658	0.309645
112	0.403942	0.266411	0.541473	0.0897951	-0.0587126	0.238303
113	0.377729	0.226696	0.528763	0.0281175	-0.128747	0.184982
114	0.337824	0.194911	0.480738	0.105055	-0.0527098	0.262819
115	0.35158	0.217364	0.485796	0.08761	-0.0630209	0.238241
116	0.370991	0.222635	0.519348	0.052342	-0.104884	0.209569
117	0.351418	0.203305	0.49953	0.0863784	-0.0750203	0.247777
118	0.36799	0.228539	0.507441	0.114289	-0.0414106	0.269988
119	0.372309	0.222346	0.522272	0.0423036	-0.121974	0.206581
120	0.357532	0.201723	0.513341	0.0115124	-0.156541	0.179566
121	0.351645	0.210697	0.492593	0.0710669	-0.0857462	0.22788
122	0.347332	0.202389	0.492276	0.0256762	-0.13244	0.183793
123	0.340029	0.184092	0.495966	-0.0109979	-0.18095	0.158954
124	0.34113	0.193079	0.489181	0.0107483	-0.149951	0.171447
125	0.341967	0.199142	0.484792	0.0214754	-0.133766	0.176717
126	0.307701	0.148851	0.466552	-0.0357356	-0.206088	0.134616
127	0.280681	0.127564	0.433799	-0.0201774	-0.187809	0.147454
128	0.355591	0.210286	0.500896	-0.0564732	-0.21535	0.102403
129	0.308852	0.146845	0.470859	-0.0732715	-0.24595	0.0994074
130	0.284541	0.125749	0.443332	-0.0652622	-0.234956	0.104431
131	0.340594	0.193264	0.487925	-0.0116555	-0.173947	0.150635
132	0.329945	0.168257	0.491634	-0.0465465	-0.216948	0.123855
133	0.301226	0.135893	0.46656	-0.117104	-0.291673	0.0574644
134	0.323961	0.176626	0.471296	-0.0599209	-0.217042	0.0971999
135	0.322103	0.167242	0.476963	-0.0479734	-0.218926	0.122979
136	0.291889	0.125809	0.45797	-0.111222	-0.290262	0.0678182
137	0.320798	0.169163	0.472432	-0.137688	-0.300367	0.0249912
138	0.326037	0.173804	0.47827	-0.108432	-0.277906	0.0610426
139	0.256037	0.0888363	0.423237	-0.211354	-0.388157	-0.03455
140	0.256062	0.101211	0.410912	-0.216176	-0.381481	-0.0508717
141	0.285856	0.13784	0.433871	-0.136422	-0.304001	0.0311567
142	0.286994	0.124606	0.449381	-0.17046	-0.348092	0.00717234
143	0.261971	0.1015	0.422443	-0.243022	-0.408647	-0.0773978
144	0.278124	0.121865	0.434384	-0.153674	-0.317861	0.0105134
145	0.309799	0.137314	0.482283	-0.144134	-0.319449	0.0311803
146	0.301465	0.132056	0.470874	-0.230369	-0.401375	-0.0593631
147	0.31445	0.15495	0.473951	-0.15314	-0.322243	0.0159627
148	0.294888	0.127026	0.46275	-0.12553	-0.302821	0.0517612
149	0.24021	0.0706723	0.409748	-0.239285	-0.416326	-0.0622447
150	0.264072	0.102382	0.425762	-0.219436	-0.392764	-0.0461068
151	0.253716	0.0895548	0.417877	-0.148001	-0.319974	0.0239723
152	0.296419	0.124883	0.467954	-0.247588	-0.420778	-0.0743982
153	0.285099	0.120124	0.450074	-0.262488	-0.439074	-0.0859027
154	0.301587	0.136345	0.466828	-0.236403	-0.410754	-0.0620522
155	0.294875	0.122935	0.466814	-0.269631	-0.439316	-0.0999463
156	0.296462	0.129621	0.463303	-0.297969	-0.471344	-0.124595
157	0.311852	0.147397	0.476306	-0.161822	-0.3393	0.0156561
158	0.317924	0.145595	0.490252	-0.192032	-0.371567	-0.0124981
159	0.32143	0.15155	0.491311	-0.250283	-0.429277	-0.0712893
160	0.348984	0.181416	0.516552	-0.163233	-0.345569	0.0191037
161	0.325622	0.15413	0.497114	-0.164042	-0.341031	0.0129477
162	0.317914	0.143457	0.492371	-0.255412	-0.435852	-0.0749712
163	0.356564	0.180956	0.532172	-0.213866	-0.395111	-0.0326206
164	0.349634	0.174812	0.524456	-0.132616	-0.311658	0.0464266
165	0.322663	0.142282	0.503044	-0.209249	-0.391687	-0.0268112
166	0.342924	0.165572	0.520276	-0.212141	-0.396649	-0.0276336
167	0.376834	0.202848	0.550821	-0.118299	-0.298757	0.062159
168	0.383909	0.208025	0.559794	-0.16041	-0.344237	0.0234163
169	0.389874	0.212121	0.567627	-0.176848	-0.36499	0.0112943
170	0.39568	0.22477	0.566591	-0.0933875	-0.280915	0.0941401
171	0.390137	0.214738	0.565536	-0.11675	-0.30109	0.0675889
172	0.382129	0.200684	0.563575	-0.159601	-0.348192	0.0289896
173	0.417537	0.243177	0.591897	-0.140716	-0.327297	0.045865
174	0.409682	0.234831	0.584533	-0.117719	-0.301091	0.065654
175	0.387153	0.202885	0.57142	-0.1381	-0.327232	0.0510313
176	0.446155	0.263264	0.629047	-0.0810342	-0.269817	0.107749
177	0.489848	0.310022	0.669675	-0.0194199	-0.205149	0.16631
178	0.494538	0.30851	0.680566	-0.0499633	-0.238571	0.138645
179	0.48673	0.302862	0.670597	-0.0453407	-0.236357	0.145676
180	0.473201	0.291573	0.654829	-0.0319067	-0.219621	0.155808
181	0.505076	0.322917	0.687235	-0.00408793	-0.194854	0.186678
182	0.531352	0.344565	0.71814	-0.0444247	-0.2349	0.146051
183	0.510145	0.324141	0.696148	0.0353814	-0.15632	0.227083
184	0.504002	0.317685	0.690319	0.0609044	-0.130268	0.252077
185	0.542349	0.355132	0.729566	-0.00338146	-0.196094	0.189332
186	0.567279	0.379726	0.754833	0.000691233	-0.19506	0.196442
187	0.536917	0.353098	0.720735	0.0867476	-0.105188	0.278683
188	0.589057	0.402307	0.775808	0.0192431	-0.176632	0.215118
189	0.600218	0.410965	0.789471	-0.0345663	-0.237888	0.168756
190	0.558484	0.375549	0.741418	0.0594103	-0.139297	0.258118
191	0.551219	0.361313	0.741125	0.0813084	-0.113369	0.275986
192	0.594094	0.402379	0.785809	0.0302707	-0.17357	0.234112
193	0.606085	0.422323	0.789847	0.134391	-0.064618	0.3334
194	0.640481	0.454698	0.826264	0.170789	-0.0278424	0.36942
195	0.660518	0.465889	0.855147	0.0665596	-0.138772	0.271892
196	0.603526	0.411072	0.79598	0.135386	-0.0697229	0.340494
197	0.62777	0.437565	0.817976	0.169423	-0.0273575	0.366203
198	0.658757	0.460974	0.856541	0.107533	-0.0955031	0.310569
199	0.666701	0.472671	0.86073	0.14859	-0.0583646	0.355545
200	0.647447	0.458697	0.836196	0.235133	0.034368	0.435897

## Sheet: S1_Panel_A
time	vEyePosControl_Mean	vEyePosControl_95ci_low	vEyePosControl_95ci_up	vEyePosLeft_Mean	vEyePosLeft_95ci_low	vEyePosLeft_95ci_up	vEyePosRight_Mean	vEyePosRight_95ci_low	vEyePosRight_95ci_up
-100	-0.651849	-0.721932	-0.581765	-0.693639	-0.756177	-0.631101	-0.670718	-0.733861	-0.607575
-99	-0.646347	-0.71581	-0.576884	-0.674754	-0.73637	-0.613138	-0.664665	-0.726974	-0.602357
-98	-0.655208	-0.724542	-0.585875	-0.659049	-0.720864	-0.597234	-0.657703	-0.720528	-0.594879
-97	-0.663484	-0.73205	-0.594918	-0.661066	-0.722666	-0.599467	-0.637314	-0.699905	-0.574722
-96	-0.636631	-0.706322	-0.56694	-0.658995	-0.720244	-0.597747	-0.622847	-0.685025	-0.560668
-95	-0.631671	-0.700046	-0.563297	-0.638619	-0.69994	-0.577299	-0.618934	-0.681072	-0.556796
-94	-0.607631	-0.675377	-0.539884	-0.629678	-0.6916	-0.567756	-0.601475	-0.662865	-0.540084
-93	-0.611254	-0.678497	-0.544011	-0.625962	-0.687252	-0.564672	-0.597779	-0.658886	-0.536673
-92	-0.603684	-0.669028	-0.538341	-0.618297	-0.678559	-0.558035	-0.575034	-0.635973	-0.514095
-91	-0.606047	-0.671617	-0.540477	-0.625646	-0.684787	-0.566505	-0.584722	-0.644256	-0.525188
-90	-0.595235	-0.660089	-0.530381	-0.613143	-0.671965	-0.554322	-0.574694	-0.633855	-0.515532
-89	-0.591574	-0.655624	-0.527525	-0.612084	-0.670507	-0.553661	-0.562006	-0.620881	-0.503132
-88	-0.589207	-0.653481	-0.524933	-0.600569	-0.659346	-0.541793	-0.558048	-0.616548	-0.499548
-87	-0.57979	-0.643978	-0.515601	-0.584779	-0.643701	-0.525857	-0.549103	-0.607824	-0.490381
-86	-0.572176	-0.636219	-0.508134	-0.579199	-0.63749	-0.520908	-0.540733	-0.598441	-0.483025
-85	-0.570356	-0.634698	-0.506015	-0.576921	-0.635855	-0.517986	-0.541814	-0.599156	-0.484471
-84	-0.571517	-0.635736	-0.507298	-0.573172	-0.631251	-0.515094	-0.530108	-0.586889	-0.473327
-83	-0.557009	-0.62063	-0.493388	-0.568498	-0.626012	-0.510984	-0.539336	-0.595844	-0.482829
-82	-0.54391	-0.607096	-0.480725	-0.555201	-0.612593	-0.497809	-0.536382	-0.592166	-0.480597
-81	-0.551112	-0.614194	-0.488029	-0.550028	-0.606451	-0.493605	-0.522797	-0.578624	-0.46697
-80	-0.568993	-0.631921	-0.506064	-0.551229	-0.606892	-0.495566	-0.512567	-0.568666	-0.456469
-79	-0.53939	-0.601565	-0.477214	-0.520224	-0.575239	-0.465209	-0.511932	-0.568609	-0.455255
-78	-0.532856	-0.594932	-0.47078	-0.513255	-0.569158	-0.457352	-0.508751	-0.565541	-0.451962
-77	-0.518591	-0.580807	-0.456375	-0.51024	-0.566242	-0.454238	-0.503853	-0.559758	-0.447949
-76	-0.521389	-0.58388	-0.458899	-0.514461	-0.570121	-0.4588	-0.492047	-0.5475	-0.436594
-75	-0.51287	-0.573822	-0.451918	-0.51137	-0.567288	-0.455452	-0.496431	-0.55206	-0.440802
-74	-0.508659	-0.567219	-0.450099	-0.496839	-0.552242	-0.441437	-0.48921	-0.544329	-0.434091
-73	-0.504331	-0.562813	-0.44585	-0.490323	-0.544855	-0.435791	-0.474859	-0.529107	-0.420612
-72	-0.492052	-0.550607	-0.433496	-0.494815	-0.54886	-0.440771	-0.449525	-0.50327	-0.395779
-71	-0.499003	-0.558627	-0.439378	-0.477535	-0.531682	-0.423388	-0.439475	-0.49349	-0.385459
-70	-0.482166	-0.540823	-0.423509	-0.457393	-0.511433	-0.403353	-0.429662	-0.482534	-0.376789
-69	-0.481339	-0.540539	-0.42214	-0.457865	-0.51178	-0.403951	-0.428771	-0.481592	-0.375951
-68	-0.457917	-0.517723	-0.39811	-0.452309	-0.506274	-0.398343	-0.436228	-0.488737	-0.383718
-67	-0.45183	-0.512147	-0.391514	-0.457192	-0.511336	-0.403048	-0.426543	-0.479444	-0.373642
-66	-0.428991	-0.4879	-0.370082	-0.436907	-0.490612	-0.383202	-0.421175	-0.474379	-0.367971
-65	-0.419535	-0.47669	-0.362381	-0.442992	-0.495525	-0.390459	-0.419145	-0.470684	-0.367607
-64	-0.407801	-0.46419	-0.351411	-0.44286	-0.495476	-0.390244	-0.413024	-0.463181	-0.362868
-63	-0.41576	-0.471744	-0.359776	-0.432085	-0.484996	-0.379175	-0.412952	-0.463718	-0.362186
-62	-0.440345	-0.496136	-0.384555	-0.411471	-0.463438	-0.359504	-0.405716	-0.455667	-0.355765
-61	-0.441225	-0.495815	-0.386635	-0.390717	-0.442412	-0.339021	-0.40211	-0.452555	-0.351664
-60	-0.444245	-0.500465	-0.388024	-0.383167	-0.434768	-0.331567	-0.401364	-0.453187	-0.349541
-59	-0.416303	-0.472449	-0.360156	-0.37902	-0.431408	-0.326632	-0.406326	-0.459096	-0.353555
-58	-0.391268	-0.446986	-0.335549	-0.386386	-0.43936	-0.333411	-0.39901	-0.451132	-0.346888
-57	-0.39253	-0.447578	-0.337483	-0.377772	-0.429514	-0.32603	-0.373882	-0.425047	-0.322716
-56	-0.379446	-0.434128	-0.324765	-0.369831	-0.421037	-0.318625	-0.350358	-0.400613	-0.300104
-55	-0.369742	-0.423531	-0.315953	-0.360081	-0.411511	-0.308651	-0.350052	-0.399704	-0.300399
-54	-0.366825	-0.420208	-0.313441	-0.352157	-0.402574	-0.30174	-0.330571	-0.379848	-0.281293
-53	-0.356931	-0.410519	-0.303344	-0.334409	-0.383716	-0.285102	-0.345774	-0.39447	-0.297078
-52	-0.328417	-0.381493	-0.27534	-0.340118	-0.390218	-0.290018	-0.332536	-0.381489	-0.283582
-51	-0.337746	-0.392496	-0.282997	-0.324043	-0.374006	-0.27408	-0.332385	-0.381618	-0.283151
-50	-0.336786	-0.389882	-0.283691	-0.283915	-0.333614	-0.234217	-0.316372	-0.366022	-0.266723
-49	-0.32253	-0.375922	-0.269138	-0.285624	-0.335245	-0.236003	-0.295035	-0.34407	-0.246001
-48	-0.302714	-0.356488	-0.24894	-0.302119	-0.351101	-0.253138	-0.294199	-0.342215	-0.246182
-47	-0.310745	-0.364326	-0.257163	-0.301575	-0.350382	-0.252768	-0.277382	-0.324793	-0.22997
-46	-0.330931	-0.383938	-0.277924	-0.283778	-0.331542	-0.236014	-0.283744	-0.330296	-0.237193
-45	-0.321327	-0.372039	-0.270616	-0.288281	-0.334975	-0.241586	-0.289057	-0.334192	-0.243922
-44	-0.302092	-0.351893	-0.252292	-0.264166	-0.310834	-0.217498	-0.2731	-0.317538	-0.228663
-43	-0.288411	-0.33728	-0.239542	-0.256622	-0.304043	-0.209201	-0.260764	-0.305706	-0.215822
-42	-0.291764	-0.342398	-0.241131	-0.246176	-0.29281	-0.199542	-0.258213	-0.303822	-0.212605
-41	-0.263591	-0.314145	-0.213037	-0.231189	-0.278021	-0.184356	-0.253095	-0.299356	-0.206834
-40	-0.253371	-0.302403	-0.204338	-0.236006	-0.2827	-0.189313	-0.247885	-0.29364	-0.202131
-39	-0.248507	-0.298332	-0.198683	-0.233961	-0.280814	-0.187109	-0.236841	-0.281804	-0.191878
-38	-0.235075	-0.284097	-0.186053	-0.224594	-0.269964	-0.179224	-0.236892	-0.280313	-0.193472
-37	-0.227179	-0.273596	-0.180761	-0.224579	-0.268169	-0.18099	-0.229775	-0.271606	-0.187944
-36	-0.23601	-0.282798	-0.189223	-0.214469	-0.257019	-0.17192	-0.204052	-0.245469	-0.162634
-35	-0.238359	-0.285387	-0.191331	-0.20423	-0.246982	-0.161479	-0.19912	-0.240465	-0.157776
-34	-0.231494	-0.277417	-0.185572	-0.199124	-0.241762	-0.156486	-0.187905	-0.229	-0.14681
-33	-0.212838	-0.259595	-0.16608	-0.182845	-0.225018	-0.140671	-0.179497	-0.219426	-0.139568
-32	-0.207606	-0.25538	-0.159832	-0.178328	-0.220875	-0.135781	-0.183029	-0.22384	-0.142219
-31	-0.207649	-0.254756	-0.160541	-0.182248	-0.22458	-0.139917	-0.195875	-0.236162	-0.155589
-30	-0.20265	-0.249183	-0.156117	-0.18814	-0.230163	-0.146118	-0.175079	-0.214616	-0.135542
-29	-0.196586	-0.242395	-0.150777	-0.189793	-0.230661	-0.148925	-0.158756	-0.198424	-0.119088
-28	-0.197996	-0.241683	-0.15431	-0.178345	-0.217617	-0.139073	-0.154178	-0.192531	-0.115825
-27	-0.189299	-0.233005	-0.145592	-0.166953	-0.205478	-0.128428	-0.166152	-0.20325	-0.129054
-26	-0.194286	-0.237601	-0.150971	-0.140037	-0.179885	-0.10019	-0.165035	-0.201485	-0.128586
-25	-0.197737	-0.240001	-0.155474	-0.134551	-0.173483	-0.0956194	-0.140561	-0.17698	-0.104142
-24	-0.186058	-0.22842	-0.143697	-0.146432	-0.184606	-0.108258	-0.137862	-0.175211	-0.100513
-23	-0.185998	-0.228739	-0.143258	-0.147201	-0.1867	-0.107703	-0.135452	-0.173675	-0.0972289
-22	-0.164611	-0.207128	-0.122095	-0.120284	-0.158495	-0.0820742	-0.121126	-0.159013	-0.0832379
-21	-0.165888	-0.206278	-0.125499	-0.107251	-0.145055	-0.0694474	-0.127483	-0.163428	-0.091539
-20	-0.150948	-0.189776	-0.11212	-0.1029	-0.139078	-0.0667227	-0.11896	-0.153445	-0.0844753
-19	-0.150851	-0.189779	-0.111922	-0.104629	-0.139442	-0.0698162	-0.12016	-0.153852	-0.0864673
-18	-0.150278	-0.188709	-0.111847	-0.112048	-0.146783	-0.077313	-0.121093	-0.154295	-0.0878908
-17	-0.139718	-0.177618	-0.101818	-0.0957593	-0.12993	-0.0615885	-0.109972	-0.143631	-0.0763132
-16	-0.143638	-0.181357	-0.105919	-0.104026	-0.137633	-0.0704187	-0.0962521	-0.129212	-0.063292
-15	-0.143182	-0.181316	-0.105047	-0.0906023	-0.125859	-0.0553451	-0.0937443	-0.12627	-0.0612189
-14	-0.118564	-0.158062	-0.0790654	-0.0661431	-0.101816	-0.0304705	-0.0845118	-0.116825	-0.0521987
-13	-0.103038	-0.141443	-0.0646326	-0.0580707	-0.0922187	-0.0239227	-0.0844648	-0.117594	-0.0513353
-12	-0.094168	-0.130398	-0.0579381	-0.0608495	-0.0945255	-0.0271736	-0.0848931	-0.116562	-0.0532246
-11	-0.0720476	-0.109698	-0.0343977	-0.0571019	-0.089967	-0.0242368	-0.0764355	-0.108037	-0.0448345
-10	-0.0691323	-0.107705	-0.0305596	-0.0455375	-0.0781773	-0.0128978	-0.0740664	-0.106457	-0.041676
-9	-0.0624008	-0.0974242	-0.0273773	-0.0363181	-0.0671303	-0.00550592	-0.0686541	-0.0978069	-0.0395013
-8	-0.0632705	-0.096332	-0.0302091	-0.0255081	-0.0552396	0.00422341	-0.0598113	-0.0887342	-0.0308883
-7	-0.0763006	-0.11094	-0.041661	-0.0171917	-0.0466795	0.0122962	-0.0499608	-0.0803359	-0.0195856
-6	-0.0673382	-0.103264	-0.0314127	-0.0156389	-0.0472426	0.0159648	-0.052205	-0.0822973	-0.0221127
-5	-0.047933	-0.0831327	-0.0127333	-0.0153479	-0.0462851	0.0155893	-0.0430342	-0.0745831	-0.0114853
-4	-0.0375367	-0.0720391	-0.00303435	-0.0165983	-0.0473144	0.0141178	-0.0337709	-0.0643118	-0.00323002
-3	-0.0267984	-0.0598935	0.00629659	-0.0195805	-0.0495128	0.0103517	-0.0258266	-0.0547982	0.00314498
-2	-0.0191655	-0.0512586	0.0129276	-0.000815509	-0.0282398	0.0266088	-0.0094161	-0.0355165	0.0166843
-1	-0.0210586	-0.0445077	0.00239057	0.000181886	-0.0194038	0.0197676	-0.0170871	-0.0367225	0.00254831
0	0	0	0	0	0	0	0	0	0
1	-0.0109262	-0.0324078	0.0105554	0.00107991	-0.0180935	0.0202533	0.0208602	0.0015717	0.0401488
2	-0.0078779	-0.0369067	0.0211509	0.0330078	0.00638903	0.0596266	0.0149203	-0.0100738	0.0399143
3	-0.00877756	-0.0415442	0.0239891	0.0436172	0.0131616	0.0740728	0.0117149	-0.0163665	0.0397964
4	-0.0202498	-0.0550249	0.0145254	0.040059	0.00871288	0.071405	0.0260384	-0.00429336	0.0563702
5	0.000101109	-0.0372254	0.0374276	0.045298	0.0123251	0.0782708	0.0375364	0.00707637	0.0679964
6	-0.00812952	-0.0452558	0.0289968	0.0610681	0.0280113	0.0941248	0.0302608	-0.000335448	0.0608571
7	0.0198975	-0.0150046	0.0547996	0.0598162	0.0277314	0.0919011	0.0209418	-0.00954045	0.0514241
8	0.0217169	-0.0112822	0.0547161	0.0651758	0.0347056	0.0956461	0.0339183	0.00492944	0.0629072
9	0.0314845	-0.00222197	0.065191	0.0656346	0.0345482	0.0967211	0.0488438	0.0188248	0.0788627
10	0.0230485	-0.0140052	0.0601022	0.0614813	0.0285714	0.0943912	0.0498591	0.0176593	0.0820589
11	0.0364883	-0.000692942	0.0736695	0.0585616	0.0259789	0.0911443	0.0589631	0.0266849	0.0912413
12	0.0404934	0.00322612	0.0777607	0.082074	0.0498133	0.114335	0.0612574	0.0293164	0.0931984
13	0.0449282	0.0070679	0.0827885	0.100879	0.0670137	0.134745	0.0713788	0.0375286	0.105229
14	0.0394094	-0.00109672	0.0799155	0.106226	0.071601	0.14085	0.0788342	0.0436249	0.114044
15	0.069353	0.0297288	0.108977	0.117855	0.0838393	0.151871	0.087697	0.0527068	0.122687
16	0.0846173	0.0474937	0.121741	0.140306	0.106136	0.174476	0.0838391	0.0489179	0.11876
17	0.0852259	0.047195	0.123257	0.127363	0.094382	0.160344	0.0921686	0.0581869	0.12615
18	0.0979358	0.0601269	0.135745	0.125097	0.0899077	0.160287	0.0938275	0.0592586	0.128396
19	0.098697	0.0598574	0.137537	0.139377	0.103294	0.175459	0.0920359	0.0567063	0.127365
20	0.111765	0.0728754	0.150655	0.145231	0.109397	0.181064	0.105575	0.0689331	0.142218
21	0.113733	0.074	0.153466	0.143557	0.105597	0.181517	0.120525	0.0828577	0.158192
22	0.127909	0.0857626	0.170056	0.143447	0.103543	0.18335	0.114188	0.0753147	0.153061
23	0.136045	0.0939544	0.178136	0.147927	0.107974	0.18788	0.110198	0.0709334	0.149462
24	0.154227	0.114023	0.194431	0.147549	0.107861	0.187237	0.118195	0.0796055	0.156784
25	0.16675	0.12665	0.20685	0.149174	0.109671	0.188677	0.134397	0.0949131	0.17388
26	0.160065	0.118422	0.201708	0.145193	0.105774	0.184611	0.134865	0.0959306	0.173799
27	0.159724	0.117732	0.201717	0.163317	0.12358	0.203054	0.137054	0.0986284	0.17548
28	0.160914	0.119355	0.202473	0.182022	0.142322	0.221722	0.133081	0.093447	0.172716
29	0.172217	0.129671	0.214763	0.192263	0.151048	0.233478	0.149301	0.10935	0.189252
30	0.167588	0.122489	0.212688	0.199442	0.156281	0.242602	0.140873	0.100404	0.181343
31	0.184161	0.138306	0.230017	0.190201	0.146649	0.233752	0.165401	0.123785	0.207017
32	0.189015	0.142274	0.235755	0.190446	0.147372	0.23352	0.188557	0.145446	0.231668
33	0.200685	0.154251	0.24712	0.180397	0.136519	0.224275	0.190017	0.147002	0.233031
34	0.221675	0.174335	0.269014	0.177492	0.132938	0.222046	0.184382	0.140873	0.227891
35	0.207486	0.161285	0.253686	0.18	0.135383	0.224617	0.179183	0.134984	0.223382
36	0.212584	0.168244	0.256925	0.20799	0.163506	0.252474	0.190696	0.146585	0.234808
37	0.214478	0.168359	0.260596	0.22785	0.182594	0.273106	0.20792	0.163684	0.252157
38	0.189534	0.141865	0.237204	0.225031	0.178738	0.271325	0.225552	0.180951	0.270153
39	0.185567	0.136884	0.23425	0.232285	0.185345	0.279225	0.217508	0.173216	0.2618
40	0.208771	0.159636	0.257906	0.236535	0.188816	0.284253	0.231576	0.185588	0.277565
41	0.244295	0.193245	0.295345	0.233951	0.185627	0.282276	0.245222	0.197862	0.292582
42	0.269181	0.216656	0.321706	0.237827	0.189621	0.286032	0.220038	0.173034	0.267041
43	0.256869	0.204787	0.308951	0.249973	0.201835	0.298111	0.222908	0.176188	0.269628
44	0.266442	0.21664	0.316245	0.261837	0.214281	0.309393	0.240515	0.193747	0.287284
45	0.269906	0.219901	0.319911	0.261687	0.213067	0.310307	0.249407	0.202727	0.296086
46	0.277204	0.224371	0.330036	0.269883	0.219859	0.319907	0.258779	0.211225	0.306332
47	0.289394	0.236997	0.341791	0.26778	0.217807	0.317754	0.269233	0.221647	0.316818
48	0.294455	0.241364	0.347546	0.287227	0.237037	0.337417	0.293406	0.246571	0.340241
49	0.309978	0.255915	0.364042	0.29709	0.247086	0.347095	0.307406	0.258726	0.356085
50	0.303436	0.248108	0.358764	0.296117	0.245293	0.34694	0.312585	0.263363	0.361807
51	0.309772	0.253907	0.365637	0.305389	0.255278	0.355501	0.312345	0.263573	0.361118
52	0.323813	0.269842	0.377784	0.310487	0.259523	0.36145	0.310561	0.261724	0.359399
53	0.318569	0.26436	0.372777	0.331081	0.27963	0.382533	0.338255	0.288286	0.388225
54	0.309453	0.253246	0.365659	0.326603	0.273963	0.379243	0.330515	0.280786	0.380244
55	0.331023	0.274629	0.387416	0.327593	0.275454	0.379731	0.334797	0.284534	0.38506
56	0.357947	0.302413	0.413482	0.348715	0.29681	0.40062	0.358102	0.308318	0.407886
57	0.360497	0.303774	0.417219	0.361957	0.308993	0.41492	0.366409	0.316007	0.416811
58	0.361395	0.30329	0.419499	0.387991	0.33301	0.442972	0.384953	0.333877	0.436028
59	0.368618	0.31025	0.426986	0.399662	0.345443	0.453881	0.410921	0.35826	0.463583
60	0.388243	0.330415	0.44607	0.412222	0.358372	0.466073	0.432492	0.379977	0.485008
61	0.389916	0.331752	0.44808	0.40671	0.351757	0.461664	0.445936	0.39286	0.499011
62	0.389258	0.329952	0.448563	0.415169	0.359904	0.470434	0.455783	0.402381	0.509186
63	0.394402	0.335302	0.453502	0.435818	0.380661	0.490975	0.468014	0.415547	0.520481
64	0.402655	0.34426	0.461051	0.454685	0.399415	0.509956	0.488047	0.43595	0.540144
65	0.400259	0.341101	0.459418	0.470682	0.415142	0.526222	0.516779	0.463263	0.570294
66	0.403435	0.343181	0.463689	0.483121	0.427049	0.539192	0.531265	0.47748	0.585051
67	0.421282	0.360325	0.482238	0.510004	0.453123	0.566885	0.538061	0.484329	0.591793
68	0.433256	0.372286	0.494225	0.537051	0.480047	0.594054	0.567767	0.513773	0.621761
69	0.451038	0.389558	0.512518	0.550439	0.492515	0.608363	0.584965	0.529653	0.640278
70	0.444062	0.380696	0.507428	0.574649	0.516391	0.632907	0.623811	0.568443	0.679179
71	0.459912	0.397057	0.522767	0.596779	0.538476	0.655082	0.650003	0.595168	0.704837
72	0.484263	0.422674	0.545852	0.626046	0.568348	0.683744	0.69147	0.636888	0.746052
73	0.497441	0.435489	0.559394	0.650954	0.593552	0.708356	0.69826	0.643597	0.752923
74	0.492815	0.431006	0.554624	0.67751	0.618994	0.736027	0.711579	0.656744	0.766413
75	0.490025	0.427156	0.552895	0.693156	0.634556	0.751756	0.738562	0.684648	0.792476
76	0.501382	0.438034	0.56473	0.721209	0.663315	0.779103	0.766677	0.71163	0.821724
77	0.518556	0.454387	0.582724	0.735856	0.677347	0.794365	0.800693	0.744395	0.856991
78	0.529012	0.464086	0.593939	0.773973	0.713657	0.834289	0.817067	0.760172	0.873962
79	0.514952	0.451376	0.578528	0.809579	0.750235	0.868924	0.865517	0.808576	0.922458
80	0.527769	0.464857	0.590682	0.836494	0.778267	0.894722	0.894012	0.837262	0.950762
81	0.549243	0.486393	0.612094	0.88055	0.821916	0.939184	0.918063	0.861092	0.975035
82	0.559237	0.495328	0.623147	0.901416	0.842137	0.960694	0.937985	0.881205	0.994765
83	0.549451	0.485808	0.613094	0.92881	0.86802	0.9896	0.95526	0.898413	1.01211
84	0.558971	0.494413	0.62353	0.960312	0.8991	1.02152	1.00369	0.945211	1.06217
85	0.560194	0.494543	0.625845	1.00441	0.942438	1.06639	1.05343	0.994131	1.11273
86	0.580754	0.514753	0.646755	1.04002	0.978035	1.10201	1.07674	1.0168	1.13668
87	0.568883	0.502461	0.635305	1.07893	1.01729	1.14058	1.09384	1.03404	1.15364
88	0.568437	0.502513	0.634361	1.0966	1.0349	1.15831	1.14338	1.0848	1.20197
89	0.59339	0.527598	0.659182	1.12906	1.06771	1.19041	1.15999	1.10117	1.2188
90	0.607473	0.540845	0.674101	1.17634	1.11363	1.23905	1.20202	1.1434	1.26064
91	0.607425	0.540435	0.674415	1.19018	1.12736	1.25299	1.22383	1.16517	1.28248
92	0.616175	0.549945	0.682405	1.21079	1.14775	1.27383	1.25045	1.19141	1.30949
93	0.616322	0.550056	0.682588	1.23606	1.17441	1.29771	1.28502	1.22517	1.34487
94	0.626992	0.559164	0.694821	1.27761	1.21418	1.34105	1.29567	1.23511	1.35622
95	0.652297	0.584011	0.720583	1.30115	1.23599	1.3663	1.31819	1.25775	1.37862
96	0.654211	0.58612	0.722302	1.33824	1.27347	1.40301	1.34811	1.28649	1.40973
97	0.653297	0.583799	0.722796	1.36049	1.29635	1.42463	1.38347	1.32136	1.44557
98	0.669212	0.599354	0.739071	1.39612	1.3314	1.46085	1.40618	1.3446	1.46777
99	0.671154	0.600882	0.741425	1.39558	1.33102	1.46014	1.43789	1.3763	1.49948
100	0.683866	0.614452	0.75328	1.40404	1.34042	1.46766	1.46285	1.40118	1.52452
101	0.677109	0.606805	0.747413	1.44625	1.38222	1.51028	1.5032	1.44096	1.56543
102	0.687278	0.615975	0.758582	1.47918	1.41377	1.5446	1.5185	1.45664	1.58036
103	0.702357	0.631321	0.773393	1.50194	1.43544	1.56843	1.54678	1.48476	1.6088
104	0.716744	0.646043	0.787445	1.52898	1.46277	1.59519	1.57351	1.51115	1.63588
105	0.723505	0.652194	0.794816	1.55971	1.4934	1.62602	1.59211	1.52848	1.65574
106	0.730604	0.659601	0.801608	1.59391	1.5273	1.66052	1.62172	1.55795	1.68549
107	0.724739	0.654352	0.795125	1.62128	1.55382	1.68875	1.64275	1.57966	1.70584
108	0.723745	0.653721	0.793769	1.65303	1.58628	1.71978	1.67876	1.61443	1.74308
109	0.746885	0.676293	0.817477	1.68067	1.61365	1.7477	1.71361	1.64878	1.77844
110	0.732838	0.661745	0.803931	1.70323	1.63562	1.77083	1.7258	1.66203	1.78956
111	0.751719	0.679701	0.823738	1.72071	1.65183	1.78959	1.7405	1.6761	1.80491
112	0.766048	0.692559	0.839536	1.74572	1.67599	1.81545	1.76714	1.70125	1.83304
113	0.753888	0.681363	0.826412	1.77585	1.70591	1.84579	1.78768	1.72211	1.85325
114	0.75951	0.686507	0.832513	1.80721	1.73792	1.8765	1.8139	1.74792	1.87988
115	0.773245	0.699517	0.846972	1.82258	1.75297	1.89219	1.82604	1.75996	1.89212
116	0.768117	0.695616	0.840617	1.84549	1.7766	1.91438	1.85939	1.79362	1.92516
117	0.796596	0.724135	0.869058	1.86609	1.79727	1.93492	1.89095	1.82555	1.95636
118	0.790935	0.717517	0.864353	1.88683	1.81636	1.95729	1.90826	1.84268	1.97384
119	0.800564	0.727058	0.87407	1.90241	1.83152	1.9733	1.92503	1.8603	1.98976
120	0.8069	0.733297	0.880502	1.90551	1.8346	1.97642	1.95025	1.88375	2.01676
121	0.826976	0.751774	0.902179	1.94445	1.87379	2.01511	1.98423	1.91699	2.05146
122	0.818104	0.742375	0.893833	1.96482	1.89379	2.03586	1.98425	1.91588	2.05261
123	0.817855	0.741899	0.893812	1.99648	1.92486	2.06809	2.01107	1.94173	2.08042
124	0.825316	0.749746	0.900886	2.01897	1.94714	2.09081	2.05269	1.98294	2.12243
125	0.827136	0.751667	0.902605	2.033	1.96072	2.10528	2.07318	2.00287	2.14349
126	0.838195	0.761791	0.914598	2.05317	1.98099	2.12536	2.09807	2.0289	2.16725
127	0.836788	0.760898	0.912678	2.08407	2.01128	2.15686	2.11922	2.05054	2.18789
128	0.847483	0.772439	0.922526	2.09504	2.02251	2.16757	2.14124	2.07215	2.21032
129	0.837098	0.761347	0.91285	2.12134	2.04917	2.1935	2.13637	2.06562	2.20713
130	0.82941	0.75395	0.90487	2.13953	2.06619	2.21286	2.15681	2.08724	2.22639
131	0.835144	0.757742	0.912545	2.14609	2.07159	2.22058	2.17511	2.10529	2.24493
132	0.85941	0.782628	0.936191	2.16241	2.08809	2.23673	2.2007	2.1298	2.2716
133	0.876335	0.800162	0.952507	2.17794	2.1036	2.25228	2.23189	2.16173	2.30206
134	0.882986	0.804595	0.961377	2.1989	2.12365	2.27415	2.24761	2.17758	2.31764
135	0.88738	0.809661	0.965099	2.21376	2.13801	2.28951	2.25975	2.18932	2.33017
136	0.906123	0.828682	0.983563	2.23574	2.16073	2.31075	2.28936	2.21767	2.36106
137	0.915137	0.836745	0.99353	2.24944	2.17494	2.32393	2.29929	2.22768	2.3709
138	0.927278	0.848453	1.0061	2.2593	2.18474	2.33385	2.3195	2.24756	2.39145
139	0.924089	0.844867	1.00331	2.29191	2.2159	2.36792	2.33874	2.26741	2.41006
140	0.918399	0.838859	0.997938	2.32529	2.24973	2.40084	2.35403	2.28298	2.42508
141	0.930686	0.851844	1.00953	2.33522	2.2596	2.41085	2.39111	2.3193	2.46293
142	0.938988	0.858217	1.01976	2.34352	2.26773	2.41931	2.4008	2.3282	2.4734
143	0.945173	0.865533	1.02481	2.3516	2.27505	2.42815	2.40092	2.32843	2.4734
144	0.949349	0.870679	1.02802	2.35319	2.27706	2.42932	2.41713	2.3453	2.48897
145	0.953938	0.874844	1.03303	2.37986	2.30407	2.45566	2.43593	2.36417	2.50768
146	0.964767	0.88641	1.04312	2.39126	2.31504	2.46748	2.44931	2.37678	2.52184
147	0.973364	0.893482	1.05325	2.41533	2.33764	2.49302	2.46562	2.39265	2.53859
148	0.97518	0.894554	1.05581	2.41905	2.34164	2.49646	2.47826	2.4048	2.55172
149	0.983186	0.90273	1.06364	2.42029	2.34349	2.49708	2.48955	2.41519	2.56391
150	0.993383	0.913623	1.07314	2.44289	2.36605	2.51972	2.50254	2.42823	2.57685
151	1.00299	0.92262	1.08335	2.44305	2.3647	2.52141	2.50991	2.43609	2.58372
152	1.01681	0.936886	1.09674	2.45308	2.37511	2.53105	2.54739	2.47338	2.62141
153	1.01629	0.935759	1.09683	2.46311	2.38508	2.54115	2.55386	2.47936	2.62836
154	1.03508	0.953229	1.11693	2.46706	2.38862	2.5455	2.56378	2.48818	2.63938
155	1.0495	0.966707	1.13229	2.47043	2.39178	2.54909	2.55483	2.47901	2.63064
156	1.04949	0.966374	1.1326	2.46801	2.39018	2.54585	2.54187	2.46726	2.61648
157	1.04702	0.965013	1.12903	2.48063	2.40368	2.55757	2.54247	2.46677	2.61817
158	1.05838	0.97549	1.14128	2.49499	2.41716	2.57282	2.56536	2.48912	2.6416
159	1.08854	1.00579	1.17129	2.51418	2.43563	2.59273	2.56038	2.48414	2.63662
160	1.09486	1.01326	1.17645	2.5005	2.42189	2.57911	2.57101	2.49373	2.6483
161	1.09417	1.01266	1.17568	2.50337	2.42509	2.58165	2.57956	2.50263	2.65649
162	1.0841	1.00234	1.16586	2.50252	2.42381	2.58122	2.58141	2.50517	2.65766
163	1.0885	1.00628	1.17072	2.49363	2.41433	2.57293	2.58129	2.50542	2.65715
164	1.09524	1.01324	1.17724	2.49685	2.41782	2.57587	2.59152	2.51485	2.66819
165	1.10054	1.01862	1.18246	2.50097	2.42197	2.57996	2.59586	2.51884	2.67288
166	1.10731	1.02621	1.18842	2.502	2.42213	2.58186	2.59162	2.51475	2.6685
167	1.12628	1.0439	1.20865	2.49693	2.41655	2.57732	2.59443	2.51653	2.67232
168	1.13042	1.04828	1.21256	2.48735	2.40706	2.56763	2.57993	2.50163	2.65823
169	1.12156	1.03978	1.20334	2.49532	2.41429	2.57634	2.58426	2.50579	2.66273
170	1.13362	1.05181	1.21542	2.50633	2.42495	2.58771	2.59028	2.51187	2.66869
171	1.14181	1.05888	1.22473	2.50819	2.42768	2.5887	2.58194	2.50407	2.65981
172	1.16109	1.07793	1.24425	2.50882	2.4274	2.59024	2.59405	2.51611	2.67199
173	1.19315	1.10987	1.27644	2.50808	2.42683	2.58932	2.59976	2.52194	2.67758
174	1.18064	1.09617	1.26511	2.50726	2.42634	2.58818	2.58443	2.5068	2.66206
175	1.16339	1.07937	1.2474	2.50988	2.42809	2.59168	2.5879	2.50946	2.66635
176	1.1771	1.0916	1.26259	2.49981	2.4178	2.58182	2.60107	2.52217	2.67997
177	1.18447	1.09922	1.26972	2.50736	2.42519	2.58952	2.61164	2.53288	2.6904
178	1.20053	1.11505	1.28601	2.52098	2.43856	2.6034	2.60733	2.52818	2.68649
179	1.21254	1.12728	1.29779	2.5066	2.42414	2.58905	2.62558	2.54623	2.70493
180	1.20401	1.11848	1.28953	2.51474	2.43156	2.59792	2.62079	2.54119	2.7004
181	1.22353	1.13865	1.3084	2.52678	2.44366	2.6099	2.60322	2.52336	2.68308
182	1.23674	1.15235	1.32113	2.53511	2.45274	2.61748	2.60516	2.5258	2.68453
183	1.22203	1.13575	1.30831	2.52972	2.44691	2.61253	2.60195	2.52332	2.68058
184	1.23702	1.15123	1.32281	2.52336	2.43978	2.60694	2.58793	2.50877	2.6671
185	1.25775	1.1709	1.3446	2.51541	2.43213	2.59868	2.59472	2.51567	2.67377
186	1.2415	1.15489	1.32811	2.51546	2.43164	2.59929	2.59305	2.51421	2.67189
187	1.26046	1.17523	1.34568	2.52605	2.44225	2.60984	2.60198	2.52122	2.68274
188	1.26961	1.1838	1.35541	2.54147	2.45819	2.62475	2.61966	2.53869	2.70064
189	1.25976	1.17352	1.34601	2.55152	2.46816	2.63488	2.61324	2.53258	2.6939
190	1.27901	1.19315	1.36487	2.55192	2.46882	2.63502	2.59959	2.51939	2.67979
191	1.28456	1.19837	1.37075	2.5399	2.4567	2.62309	2.60339	2.52361	2.68317
192	1.29638	1.2095	1.38325	2.53844	2.45412	2.62276	2.60289	2.52335	2.68243
193	1.29316	1.20682	1.3795	2.54869	2.46491	2.63247	2.6097	2.53014	2.68926
194	1.30016	1.21348	1.38684	2.55106	2.46671	2.6354	2.61134	2.53125	2.69142
195	1.30236	1.21418	1.39055	2.5473	2.4621	2.63249	2.5967	2.51735	2.67605
196	1.31038	1.223	1.39776	2.55665	2.47146	2.64183	2.60376	2.52296	2.68455
197	1.30719	1.22	1.39439	2.55506	2.47079	2.63934	2.62571	2.54462	2.70681
198	1.32168	1.23466	1.40871	2.55719	2.4731	2.64128	2.61435	2.5326	2.69609
199	1.34295	1.25645	1.42945	2.54718	2.46274	2.63162	2.60299	2.5217	2.68429
200	1.35719	1.27053	1.44385	2.53045	2.44596	2.61493	2.61218	2.53047	2.69388

## Sheet: S1_Panel_B
time	vEyeVelControl_Mean	vEyeVelControl_95ci_low	vEyeVelControl_95ci_up	vEyeVelLeft_Mean	vEyeVelLeft_95ci_low	vEyeVelLeft_95ci_up	vEyeVelRight_Mean	vEyeVelRight_95ci_low	vEyeVelRight_95ci_up
-100	7.60836	4.48822	10.7285	11.9187	9.03378	14.8035	9.13322	6.26164	12.0048
-99	7.67397	4.53471	10.8132	11.7717	8.91356	14.6299	9.29053	6.44211	12.139
-98	7.62237	4.46391	10.7808	11.2702	8.42306	14.1173	9.453	6.62989	12.2761
-97	7.47273	4.32041	10.6251	10.4804	7.63923	13.3216	9.68437	6.89924	12.4695
-96	7.22597	4.10558	10.3464	9.50417	6.6755	12.3328	9.87553	7.1382	12.6129
-95	6.9961	3.92456	10.0676	8.49877	5.69637	11.3012	9.90603	7.21298	12.5991
-94	6.84402	3.82138	9.86665	7.58116	4.81549	10.3468	9.74856	7.08394	12.4132
-93	6.61411	3.61669	9.61152	6.79729	4.07366	9.52091	9.44099	6.77538	12.1066
-92	6.33618	3.33582	9.33654	6.27784	3.58647	8.96922	8.94416	6.26442	11.6239
-91	6.03382	3.01863	9.04901	5.92495	3.24366	8.60624	8.33442	5.64166	11.0272
-90	5.71709	2.6952	8.73897	5.87264	3.18728	8.55801	7.6108	4.91674	10.3049
-89	5.39732	2.38411	8.41052	6.0025	3.30442	8.70059	6.87937	4.1932	9.56553
-88	5.09945	2.11216	8.08673	6.28605	3.58513	8.98696	6.20503	3.5253	8.88477
-87	4.86963	1.90556	7.83371	6.60256	3.91651	9.2886	5.59758	2.92212	8.27303
-86	4.75508	1.7929	7.71726	6.98671	4.33103	9.64239	5.04563	2.37058	7.72068
-85	4.72682	1.73779	7.71586	7.29138	4.66776	9.915	4.66053	1.99406	7.327
-84	4.75954	1.73287	7.78621	7.51322	4.90074	10.1257	4.38662	1.74881	7.02443
-83	4.91566	1.86087	7.97044	7.66392	5.02687	10.301	4.26908	1.67504	6.86313
-82	5.11869	2.06684	8.17054	7.73435	5.04375	10.425	4.32167	1.7728	6.87053
-81	5.30435	2.27781	8.33089	7.75188	5.00292	10.5009	4.53586	2.01668	7.05503
-80	5.4696	2.47898	8.46021	7.61651	4.83373	10.3993	4.97212	2.45188	7.49237
-79	5.57893	2.60222	8.55564	7.46167	4.68064	10.2427	5.57418	3.01866	8.12969
-78	5.68772	2.69999	8.67546	7.30746	4.5621	10.0528	6.3288	3.71474	8.94285
-77	5.82895	2.81845	8.83944	7.14475	4.45194	9.83756	7.10911	4.43319	9.78503
-76	6.11378	3.08363	9.14393	7.01529	4.3713	9.65927	7.88022	5.1585	10.6019
-75	6.49792	3.46802	9.52783	6.86207	4.24606	9.47807	8.49896	5.76682	11.2311
-74	7.04744	4.04281	10.0521	6.73982	4.12939	9.35026	8.86788	6.15666	11.5791
-73	7.66206	4.6926	10.6315	6.62336	4.00615	9.24058	8.96494	6.29098	11.6389
-72	8.25516	5.31357	11.1968	6.5365	3.91068	9.16232	8.72646	6.08378	11.3691
-71	8.75922	5.8357	11.6827	6.47485	3.84118	9.10853	8.12777	5.49244	10.7631
-70	9.00285	6.08505	11.9207	6.47438	3.82963	9.11914	7.2605	4.59999	9.92101
-69	8.91787	6.00024	11.8355	6.54136	3.8907	9.19203	6.22408	3.51792	8.93024
-68	8.44732	5.52616	11.3685	6.69754	4.05165	9.34344	5.13771	2.38655	7.88888
-67	7.61104	4.67704	10.545	6.89303	4.26371	9.52236	4.2202	1.44218	6.99823
-66	6.52044	3.5614	9.47947	7.18963	4.58731	9.79194	3.50303	0.726885	6.27918
-65	5.50837	2.51272	8.50401	7.5254	4.95003	10.1008	3.15096	0.402311	5.89961
-64	4.62503	1.59701	7.65305	7.71525	5.15149	10.279	3.18989	0.48223	5.89756
-63	4.11261	1.07264	7.15257	7.87666	5.30191	10.4514	3.58973	0.91223	6.26723
-62	4.04915	1.03536	7.06293	7.99791	5.39922	10.5966	4.32949	1.66606	6.99292
-61	4.56339	1.60235	7.52443	8.06506	5.4446	10.6855	5.22108	2.55621	7.88595
-60	5.55964	2.65652	8.46275	8.07337	5.44423	10.7025	6.25074	3.57468	8.9268
-59	6.81082	3.94916	9.67248	8.10733	5.49051	10.7242	7.26587	4.57888	9.95286
-58	8.09195	5.23963	10.9443	8.13842	5.54443	10.7324	8.12179	5.42888	10.8147
-57	9.14965	6.26882	12.0305	8.27816	5.70424	10.8521	8.74182	6.05382	11.4298
-56	9.8893	6.96208	12.8165	8.44955	5.88529	11.0138	9.1475	6.46385	11.8312
-55	10.0453	7.06243	13.0282	8.58965	6.02025	11.1591	9.31418	6.63968	11.9887
-54	9.72083	6.68115	12.7605	8.74588	6.16111	11.3306	9.27465	6.60739	11.9419
-53	8.94088	5.8566	12.0252	8.81338	6.20624	11.4205	9.07773	6.4167	11.7388
-52	7.90366	4.79588	11.0114	8.78834	6.15917	11.4175	8.76081	6.1026	11.419
-51	6.78612	3.68179	9.89045	8.62128	5.97108	11.2715	8.36593	5.71573	11.0161
-50	5.86983	2.78827	8.95138	8.37686	5.70884	11.0449	7.90515	5.26131	10.549
-49	5.28066	2.23705	8.32428	8.09574	5.42007	10.7714	7.45352	4.81359	10.0935
-48	5.12178	2.11179	8.13177	7.8288	5.15503	10.5026	7.02676	4.3848	9.66873
-47	5.40769	2.41213	8.40325	7.57429	4.90548	10.2431	6.64321	3.99868	9.28773
-46	6.02749	3.03164	9.02335	7.38396	4.72659	10.0413	6.36963	3.72449	9.01477
-45	6.88025	3.88033	9.88016	7.2951	4.6446	9.94561	6.26363	3.6286	8.89865
-44	7.72974	4.72095	10.7385	7.28028	4.63253	9.92802	6.28607	3.66541	8.90673
-43	8.41809	5.39855	11.4376	7.3278	4.67747	9.97812	6.45339	3.8378	9.06899
-42	8.9012	5.87557	11.9268	7.33243	4.67547	9.98939	6.73395	4.10863	9.35926
-41	9.02714	5.99856	12.0557	7.27409	4.60721	9.94096	7.11843	4.46638	9.77047
-40	8.82288	5.79639	11.8494	7.08233	4.405	9.75966	7.57475	4.88775	10.2617
-39	8.34778	5.33556	11.36	6.81812	4.13738	9.49886	7.8963	5.17927	10.6133
-38	7.66252	4.67511	10.6499	6.48898	3.80983	9.16813	8.15337	5.41997	10.8868
-37	6.85386	3.90118	9.80654	6.16745	3.48869	8.84621	8.18893	5.44994	10.9279
-36	6.05293	3.1317	8.97416	5.80257	3.11546	8.48968	7.9973	5.25369	10.7409
-35	5.37096	2.47758	8.26434	5.40385	2.68962	8.11809	7.63256	4.89092	10.3742
-34	4.76506	1.88728	7.64283	5.10011	2.34126	7.85896	7.09254	4.35254	9.83253
-33	4.2621	1.38391	7.14028	4.96223	2.16216	7.76231	6.55598	3.82547	9.28649
-32	3.8932	1.00753	6.77886	4.99946	2.17505	7.82388	6.04583	3.33149	8.76018
-31	3.65578	0.757858	6.5537	5.12153	2.30215	7.94092	5.64688	2.95275	8.341
-30	3.52428	0.605119	6.44344	5.47784	2.68325	8.27242	5.3903	2.71676	8.06384
-29	3.48094	0.534196	6.42768	5.89678	3.1339	8.65966	5.24892	2.59417	7.90367
-28	3.49228	0.507658	6.4769	6.34387	3.6074	9.08035	5.17868	2.5445	7.81286
-27	3.65176	0.62828	6.67525	6.76873	4.04082	9.49664	5.18762	2.57583	7.7994
-26	3.86985	0.82308	6.91662	7.0793	4.34517	9.81343	5.22053	2.62534	7.81572
-25	4.12497	1.07703	7.17291	7.24452	4.49946	9.98958	5.2273	2.63896	7.81563
-24	4.45286	1.41357	7.49214	7.21292	4.45865	9.96719	5.19176	2.59445	7.78907
-23	4.78404	1.75163	7.81646	6.99219	4.23199	9.75239	5.13606	2.51946	7.75265
-22	5.13563	2.09719	8.17408	6.66595	3.90411	9.42779	5.06763	2.42864	7.70662
-21	5.58765	2.53374	8.64156	6.30503	3.54703	9.06303	4.95685	2.30356	7.61013
-20	6.09362	3.02551	9.16174	6.01744	3.26592	8.76897	4.9106	2.25761	7.56359
-19	6.64515	3.57373	9.71657	5.90314	3.16974	8.63654	4.8859	2.24551	7.52629
-18	7.22752	4.16286	10.2922	5.97814	3.26792	8.68836	4.88088	2.25625	7.50552
-17	7.82249	4.77631	10.8687	6.2646	3.5834	8.9458	4.89487	2.27605	7.51369
-16	8.38144	5.34924	11.4136	6.66243	4.00312	9.32173	4.92375	2.30014	7.54737
-15	8.83469	5.80599	11.8634	7.13071	4.48135	9.78007	4.94942	2.31876	7.58007
-14	9.04073	6.00524	12.0762	7.55389	4.90526	10.2025	4.92301	2.28984	7.55619
-13	9.0731	6.02469	12.1215	7.81647	5.17374	10.4592	4.88025	2.25643	7.50407
-12	8.85271	5.79458	11.9108	7.79869	5.16606	10.4313	4.94631	2.33782	7.55481
-11	8.48372	5.42336	11.5441	7.49456	4.87331	10.1158	5.11434	2.51733	7.71135
-10	8.08115	5.02484	11.1375	6.98234	4.35459	9.6101	5.31226	2.71905	7.90546
-9	7.61198	4.56196	10.662	6.34031	3.68558	8.99504	5.61857	3.02862	8.20852
-8	7.27909	4.23028	10.3279	5.63958	2.94515	8.33401	6.06842	3.49123	8.64561
-7	6.93702	3.88995	9.98409	4.98405	2.2576	7.7105	6.58553	4.03122	9.13984
-6	6.7109	3.66789	9.75391	4.50251	1.76426	7.24076	7.12155	4.58476	9.65833
-5	6.4549	3.41569	9.49412	4.31273	1.589	7.03647	7.56496	5.02651	10.1034
-4	6.1904	3.16141	9.21938	4.4623	1.76519	7.15941	7.89388	5.3259	10.4619
-3	5.8117	2.79254	8.83087	4.94862	2.26512	7.63212	8.02638	5.41473	10.638
-2	5.31359	2.29719	8.32999	5.55119	2.85584	8.24654	7.93203	5.28417	10.5799
-1	4.76265	1.74309	7.78221	6.23383	3.5093	8.95837	7.58483	4.9285	10.2412
0	4.2716	1.25436	7.28884	6.83694	4.07845	9.59544	7.06611	4.42549	9.70672
1	3.78925	0.782222	6.79628	7.1897	4.40563	9.97376	6.41209	3.7919	9.03228
2	3.47213	0.484012	6.46025	7.22713	4.43422	10.02	5.76148	3.15075	8.3722
3	3.41631	0.451634	6.38098	7.05811	4.28057	9.83565	5.17608	2.55042	7.80175
4	3.5477	0.59382	6.50159	6.69639	3.95602	9.43676	4.7379	2.08106	7.39473
5	3.91602	0.952343	6.87969	6.21919	3.52869	8.90969	4.52594	1.84345	7.20844
6	4.40175	1.41856	7.38494	5.80879	3.16489	8.45269	4.51317	1.82062	7.20571
7	4.97186	1.97266	7.97106	5.60196	2.99242	8.21149	4.66788	1.98179	7.35396
8	5.56426	2.56936	8.55916	5.67209	3.07043	8.27375	4.96765	2.29481	7.64049
9	6.1201	3.1467	9.09349	6.02644	3.4112	8.64169	5.35282	2.68958	8.01606
10	6.57725	3.63585	9.51866	6.60458	3.96228	9.24689	5.69195	3.0255	8.3584
11	6.98642	4.06366	9.90917	7.26644	4.59371	9.93918	5.90279	3.22288	8.5827
12	7.40411	4.48849	10.3197	7.88966	5.19086	10.5885	5.99337	3.30069	8.68604
13	7.82158	4.9027	10.7405	8.20886	5.50108	10.9167	5.90655	3.21601	8.59709
14	8.28226	5.35557	11.2089	8.16307	5.45847	10.8677	5.75716	3.08467	8.42965
15	8.6704	5.74546	11.5953	7.72036	5.02459	10.4161	5.48379	2.83425	8.13333
16	9.07889	6.15451	12.0033	6.93871	4.25022	9.6272	5.1916	2.55969	7.82351
17	9.35783	6.42455	12.2911	5.90438	3.2083	8.60045	4.88909	2.26782	7.51036
18	9.49754	6.54922	12.4459	4.81283	2.08966	7.53601	4.61563	1.99275	7.2385
19	9.47765	6.50659	12.4487	3.91925	1.15895	6.67954	4.38923	1.75973	7.01873
20	9.16718	6.17905	12.1553	3.34109	0.544455	6.13772	4.22822	1.59486	6.86157
21	8.76837	5.77858	11.7582	3.12362	0.305883	5.94135	4.18815	1.54735	6.82896
22	8.16748	5.19094	11.144	3.23936	0.424571	6.05415	4.25974	1.6113	6.90818
23	7.53086	4.56956	10.4922	3.5924	0.80486	6.37995	4.39712	1.74883	7.04542
24	6.97166	4.01459	9.92872	4.0809	1.33551	6.82629	4.58897	1.95096	7.22698
25	6.55703	3.59496	9.51911	4.51623	1.81207	7.2204	4.9264	2.30555	7.54726
26	6.21354	3.23837	9.1887	4.80535	2.13103	7.47966	5.29777	2.69531	7.90022
27	5.92739	2.94592	8.90886	4.85363	2.18941	7.51785	5.70643	3.1116	8.30127
28	5.65018	2.67969	8.62067	4.67808	2.00625	7.3499	6.19523	3.58655	8.80392
29	5.44279	2.50439	8.3812	4.38077	1.69307	7.06846	6.65906	4.02596	9.29217
30	5.10469	2.2087	8.00068	4.06989	1.36324	6.77654	7.03347	4.38551	9.68144
31	4.69294	1.8357	7.55019	3.83963	1.1137	6.56555	7.33785	4.69099	9.9847
32	4.26776	1.43572	7.0998	3.83137	1.08498	6.57776	7.49088	4.86045	10.1213
33	3.85118	1.02101	6.68136	4.0884	1.3284	6.8484	7.47917	4.86334	10.095
34	3.59583	0.74126	6.45041	4.4862	1.72719	7.24521	7.27782	4.65651	9.89914
35	3.53307	0.629473	6.43666	5.00121	2.26287	7.73955	6.90176	4.25884	9.54469
36	3.83351	0.873654	6.79337	5.56674	2.86284	8.27063	6.40016	3.72607	9.07424
37	4.44679	1.43884	7.45473	6.05104	3.38944	8.71265	5.90916	3.22221	8.59612
38	5.34189	2.30048	8.38331	6.38709	3.76283	9.01134	5.52736	2.85969	8.19503
39	6.43437	3.38481	9.48394	6.51704	3.90829	9.12579	5.25834	2.63455	7.88212
40	7.5727	4.5298	10.6156	6.52003	3.90414	9.13592	5.25786	2.68764	7.82809
41	8.55196	5.51617	11.5877	6.46131	3.82206	9.10057	5.55761	3.02597	8.08924
42	9.18995	6.16013	12.2198	6.33195	3.66976	8.99415	6.094	3.56854	8.61945
43	9.44195	6.4196	12.4643	6.23229	3.55813	8.90644	6.8676	4.31469	9.42052
44	9.2495	6.23606	12.2629	6.18178	3.51021	8.85336	7.66697	5.06942	10.2645
45	8.72422	5.73298	11.7155	6.21833	3.55692	8.87974	8.43063	5.79477	11.0665
46	7.91703	4.95769	10.8764	6.35241	3.69221	9.01261	8.98099	6.32156	11.6404
47	7.07869	4.14542	10.012	6.58007	3.90006	9.26007	9.26364	6.60978	11.9175
48	6.36412	3.43817	9.29007	6.88257	4.16725	9.5979	9.32557	6.69887	11.9523
49	5.84848	2.91166	8.78529	7.23141	4.47817	9.98466	9.23418	6.6338	11.8346
50	5.68613	2.72378	8.64847	7.65824	4.88322	10.4332	9.09744	6.50139	11.6935
51	5.84889	2.86673	8.83105	8.12683	5.35534	10.8983	9.01001	6.39096	11.6291
52	6.24228	3.25127	9.23329	8.65962	5.91495	11.4043	9.14292	6.48367	11.8022
53	6.7918	3.79077	9.79283	9.25456	6.55019	11.9589	9.58968	6.90162	12.2777
54	7.35353	4.33409	10.373	9.8429	7.18113	12.5047	10.3887	7.69815	13.0792
55	7.74992	4.69573	10.8041	10.4103	7.78393	13.0367	11.4762	8.81218	14.1401
56	7.95394	4.85706	11.0508	10.9092	8.30213	13.5162	12.6463	10.0207	15.2719
57	7.87546	4.75165	10.9993	11.3386	8.73025	13.9469	13.8911	11.2884	16.4938
58	7.60967	4.48673	10.7326	11.693	9.05568	14.3304	14.9632	12.3561	17.5704
59	7.17046	4.0849	10.256	12.0389	9.3517	14.726	15.8457	13.2102	18.4812
60	6.70815	3.68513	9.73117	12.4725	9.73014	15.2149	16.5345	13.8639	19.2052
61	6.33506	3.37172	9.29841	13.0646	10.2849	15.8444	17.0716	14.384	19.7592
62	6.12972	3.20418	9.05526	13.8727	11.0847	16.6607	17.5716	14.8886	20.2546
63	6.19044	3.26787	9.11302	14.9069	12.1413	17.6725	18.0865	15.43	20.7431
64	6.51164	3.5565	9.46678	16.0987	13.3712	18.8262	18.759	16.1361	21.382
65	7.16603	4.15829	10.1738	17.4263	14.7306	20.1221	19.5356	16.9354	22.1358
66	7.95682	4.89778	11.0159	18.7807	16.0956	21.4659	20.4532	17.8531	23.0534
67	8.71798	5.61981	11.8162	20.0366	17.3498	22.7234	21.4633	18.8438	24.0828
68	9.37456	6.25878	12.4903	21.1322	18.4414	23.823	22.413	19.7641	25.0618
69	9.88028	6.77417	12.9864	22.0646	19.3867	24.7426	23.34	20.6608	26.0192
70	10.0625	6.98771	13.1373	22.8383	20.1834	25.4932	24.1063	21.3996	26.8131
71	9.94089	6.90089	12.9809	23.4256	20.7923	26.059	24.6551	21.9283	27.3819
72	9.56337	6.54578	12.581	23.9616	21.3324	26.5908	25.11	22.3689	27.8511
73	9.09738	6.07776	12.117	24.4764	21.8318	27.1211	25.5099	22.769	28.2507
74	8.58405	5.55026	11.6178	25.1319	22.4631	27.8007	25.8281	23.0974	28.5587
75	8.01317	4.96984	11.0565	25.9067	23.2172	28.5963	26.2323	23.5187	28.9459
76	7.50967	4.47395	10.5454	26.8205	24.1252	29.5158	26.6931	23.997	29.3891
77	7.11955	4.11372	10.1254	27.9037	25.2158	30.5916	27.2928	24.6017	29.9839
78	6.79804	3.83471	9.76136	29.052	26.3711	31.733	27.9937	25.2986	30.6888
79	6.54579	3.61104	9.48053	30.2097	27.5351	32.8843	28.7395	26.0433	31.4356
80	6.34468	3.4174	9.27195	31.2662	28.5962	33.9362	29.5259	26.842	32.2099
81	6.14799	3.20849	9.0875	32.2059	29.545	34.8667	30.2903	27.6489	32.9317
82	5.98813	3.03235	8.94391	32.8771	30.2369	35.5174	30.9936	28.4134	33.5739
83	5.90626	2.94372	8.8688	33.2654	30.6601	35.8707	31.4994	28.986	34.0128
84	5.86263	2.90849	8.81677	33.3416	30.7752	35.908	31.8322	29.3555	34.3089
85	5.99434	3.05176	8.93691	33.1896	30.6529	35.7263	31.8679	29.3831	34.3527
86	6.22724	3.29104	9.16343	32.837	30.307	35.367	31.659	29.1319	34.186
87	6.5915	3.6411	9.5419	32.2611	29.7175	34.8046	31.1124	28.5351	33.6896
88	7.02347	4.04312	10.0038	31.5733	29.0051	34.1415	30.4155	27.7972	33.0339
89	7.49992	4.48394	10.5159	30.8225	28.2332	33.4119	29.5792	26.9394	32.219
90	7.94755	4.90995	10.9852	30.056	27.4572	32.6547	28.6857	26.0388	31.3326
91	8.29053	5.27069	11.3104	29.2439	26.651	31.8367	27.8744	25.2255	30.5233
92	8.47199	5.49247	11.4515	28.4342	25.8558	31.0125	27.1941	24.5395	29.8486
93	8.51676	5.58184	11.4517	27.6024	25.0366	30.1682	26.8048	24.1444	29.4652
94	8.49793	5.58932	11.4065	26.7652	24.2037	29.3266	26.597	23.9392	29.2548
95	8.33892	5.41831	11.2595	26.0119	23.4411	28.5826	26.5923	23.9469	29.2377
96	8.17224	5.21235	11.1321	25.3578	22.7634	27.9521	26.7712	24.1426	29.3998
97	7.95318	4.94573	10.9606	24.9399	22.3108	27.569	27.0312	24.4225	29.6398
98	7.7832	4.74618	10.8202	24.7809	22.1157	27.4461	27.2907	24.6927	29.8887
99	7.66814	4.63335	10.7029	24.9051	22.2123	27.598	27.4479	24.8531	30.0427
100	7.57824	4.56987	10.5866	25.27	22.5617	27.9782	27.4416	24.8442	30.0389
101	7.41848	4.45365	10.3833	25.8842	23.1679	28.6005	27.3554	24.7519	29.9588
102	7.29182	4.36168	10.222	26.6006	23.8793	29.3218	27.1636	24.5527	29.7745
103	7.06515	4.14293	9.98736	27.3603	24.6354	30.0852	26.7959	24.1732	29.4187
104	6.77381	3.83258	9.71505	28.0069	25.2791	30.7348	26.3992	23.7615	29.0369
105	6.39822	3.42364	9.37279	28.396	25.6667	31.1253	25.9176	23.2589	28.5764
106	6.02555	3.01817	9.03293	28.574	25.8517	31.2962	25.4092	22.7292	28.0892
107	5.62707	2.59697	8.65716	28.4027	25.7044	31.101	24.8686	22.175	27.5622
108	5.35277	2.31982	8.38572	27.9619	25.3022	30.6216	24.3731	21.6764	27.0698
109	5.20368	2.18464	8.22272	27.2112	24.5882	29.8342	23.9278	21.2445	26.611
110	5.16225	2.15844	8.16606	26.3026	23.7017	28.9034	23.5058	20.8497	26.1618
111	5.30727	2.30012	8.31442	25.2887	22.6855	27.8918	23.1679	20.5444	25.7914
112	5.59686	2.57288	8.62083	24.2766	21.6468	26.9065	22.8858	20.2957	25.4759
113	5.96393	2.92054	9.00732	23.2529	20.5827	25.9232	22.7173	20.1461	25.2885
114	6.3429	3.29647	9.38934	22.4076	19.7038	25.1113	22.6313	20.0562	25.2064
115	6.68126	3.66	9.70252	21.73	19.0129	24.4472	22.723	20.1239	25.3221
116	6.95856	3.9901	9.92702	21.2102	18.5028	23.9176	22.8588	20.2233	25.4943
117	7.06771	4.15681	9.97862	20.9251	18.249	23.6013	23.1016	20.4339	25.7692
118	6.93576	4.06262	9.8089	20.8777	18.2388	23.5166	23.3488	20.663	26.0347
119	6.57487	3.70787	9.44187	21.0374	18.4277	23.6471	23.5251	20.8417	26.2085
120	6.03388	3.14211	8.92565	21.3191	18.7286	23.9097	23.6291	20.9586	26.2996
121	5.34501	2.4125	8.27752	21.6374	19.0511	24.2236	23.5773	20.9187	26.2359
122	4.57277	1.60144	7.5441	21.8855	19.2954	24.4756	23.3274	20.6755	25.9794
123	3.84507	0.839298	6.85084	21.9779	19.3776	24.5781	22.9024	20.2474	25.5573
124	3.17766	0.150767	6.20456	21.8576	19.2426	24.4726	22.2842	19.6212	24.9473
125	2.83098	-0.200209	5.86217	21.4422	18.8089	24.0755	21.5846	18.9127	24.2564
126	2.81843	-0.197699	5.83455	20.7629	18.1073	23.4185	20.8773	18.2024	23.5521
127	3.14485	0.159391	6.1303	19.9192	17.2402	22.5982	20.1486	17.4795	22.8177
128	3.88338	0.931224	6.83553	19.0038	16.3084	21.6993	19.5675	16.912	22.223
129	4.91482	1.98929	7.84035	18.1404	15.441	20.8399	19.1784	16.5404	21.8163
130	6.08525	3.16692	9.00357	17.5102	14.8103	20.2101	19.0191	16.4018	21.6363
131	7.30459	4.37136	10.2378	17.1065	14.413	19.7999	19.0343	16.4389	21.6297
132	8.29726	5.33553	11.259	17.0049	14.3252	19.6846	19.1854	16.6074	21.7635
133	9.02558	6.02548	12.0257	17.1146	14.4585	19.7707	19.4092	16.8442	21.9741
134	9.37503	6.33967	12.4104	17.3999	14.7784	20.0214	19.6217	17.0559	22.1874
135	9.32896	6.27201	12.3859	17.7908	15.2014	20.3803	19.7248	17.1454	22.3042
136	8.88522	5.83113	11.9393	18.0254	15.4502	20.6007	19.6109	17.0088	22.213
137	8.21767	5.1932	11.2421	18.1317	15.5461	20.7173	19.3604	16.7318	21.989
138	7.4253	4.44855	10.4021	17.9803	15.3592	20.6013	18.8433	16.1949	21.4917
139	6.66616	3.74922	9.5831	17.5743	14.9077	20.2409	18.1454	15.4891	20.8018
140	6.03069	3.16149	8.89989	16.9681	14.2657	19.6705	17.3585	14.7064	20.0107
141	5.59328	2.74435	8.44221	16.2068	13.4946	18.9189	16.5996	13.9622	19.2369
142	5.45912	2.60359	8.31464	15.3441	12.6395	18.0488	15.9631	13.3433	18.5829
143	5.57854	2.70029	8.4568	14.4678	11.778	17.1577	15.4537	12.8431	18.0644
144	5.92301	3.01366	8.83236	13.5829	10.9084	16.2575	15.106	12.4873	17.7247
145	6.37522	3.4397	9.31074	12.6985	10.0295	15.3675	14.8922	12.2513	17.5332
146	6.90493	3.94732	9.86255	11.9202	9.25465	14.5858	14.6945	12.0218	17.3671
147	7.41806	4.44752	10.3886	11.1559	8.50151	13.8103	14.4181	11.7195	17.1166
148	7.92427	4.93716	10.9114	10.4297	7.80142	13.058	13.9536	11.2466	16.6606
149	8.39058	5.38424	11.3969	9.74937	7.15909	12.3397	13.2523	10.5607	15.944
150	8.81732	5.78941	11.8452	9.11319	6.55882	11.6676	12.2639	9.59726	14.9305
151	9.15016	6.09565	12.2047	8.51112	5.96947	11.0528	10.9708	8.32097	13.6206
152	9.38645	6.31888	12.454	7.96188	5.39836	10.5254	9.52398	6.87123	12.1767
153	9.44246	6.38536	12.4995	7.48615	4.86954	10.1028	8.00571	5.32971	10.6817
154	9.35294	6.33578	12.3701	7.02264	4.34674	9.69854	6.61841	3.91107	9.32574
155	9.13591	6.18123	12.0906	6.48103	3.76244	9.19962	5.47267	2.75053	8.1948
156	8.70099	5.80431	11.5977	5.86331	3.13079	8.59583	4.59697	1.87403	7.3199
157	8.11562	5.25418	10.9771	5.13833	2.42382	7.85284	4.09663	1.38188	6.81138
158	7.40287	4.53991	10.2658	4.27328	1.58656	6.96	3.87539	1.17421	6.57657
159	6.59904	3.70758	9.49049	3.32495	0.654107	5.9958	3.80455	1.11229	6.4968
160	5.89786	2.97835	8.81736	2.29555	-0.388162	4.97926	3.7933	1.10313	6.48348
161	5.37061	2.43706	8.30415	1.32474	-1.39602	4.0455	3.6884	1.00101	6.37579
162	5.03447	2.11365	7.95529	0.508153	-2.25469	3.271	3.38982	0.712857	6.06679
163	4.99033	2.10035	7.88031	-0.0770056	-2.86391	2.7099	2.88478	0.228327	5.54124
164	5.19496	2.33905	8.05087	-0.382877	-3.15778	2.39202	2.24163	-0.386158	4.86942
165	5.60863	2.76645	8.45081	-0.409621	-3.13785	2.31861	1.46994	-1.12917	4.06905
166	6.20389	3.34011	9.06767	-0.213369	-2.87604	2.4493	0.78813	-1.80039	3.37665
167	6.78104	3.86557	9.69651	0.102915	-2.50371	2.70954	0.25482	-2.34368	2.85332
168	7.3101	4.32311	10.2971	0.447355	-2.13321	3.02792	-0.00190899	-2.63286	2.62904
169	7.72626	4.67948	10.773	0.780042	-1.80993	3.37002	0.0579429	-2.61981	2.7357
170	7.90532	4.83119	10.9795	1.04339	-1.57498	3.66177	0.467159	-2.25748	3.1918
171	7.87046	4.8062	10.9347	1.25894	-1.3861	3.90398	1.09483	-1.66035	3.85001
172	7.75444	4.73334	10.7755	1.4026	-1.26137	4.06656	1.83027	-0.930882	4.59142
173	7.4995	4.53489	10.4641	1.49782	-1.17464	4.17027	2.43206	-0.31488	5.179
174	7.17555	4.25072	10.1004	1.53229	-1.14951	4.2141	2.82097	0.0991701	5.54277
175	6.94317	4.02886	9.85747	1.60592	-1.0986	4.31045	2.91402	0.210071	5.61797
176	6.76161	3.83479	9.68842	1.67813	-1.05339	4.40964	2.68141	-0.0167124	5.37954
177	6.70691	3.77657	9.63726	1.76536	-0.990755	4.52147	2.12717	-0.570974	4.82531
178	6.69526	3.78898	9.60155	1.85546	-0.914272	4.6252	1.37599	-1.32239	4.07436
179	6.73237	3.87721	9.58752	1.89823	-0.864765	4.66123	0.511749	-2.17576	3.19926
180	6.76192	3.96682	9.55702	1.92294	-0.815509	4.66138	-0.296088	-2.969	2.37683
181	6.78824	4.0257	9.55078	1.95802	-0.741894	4.65794	-0.858171	-3.52476	1.80842
182	6.74829	3.96916	9.52742	1.99374	-0.661909	4.64939	-1.18203	-3.85372	1.48966
183	6.69857	3.86562	9.53153	2.09629	-0.518467	4.71104	-1.22709	-3.91665	1.46246
184	6.632	3.73441	9.52958	2.21957	-0.3656	4.80475	-0.993835	-3.70486	1.71719
185	6.49056	3.54672	9.43441	2.38736	-0.196491	4.9712	-0.588087	-3.30731	2.13113
186	6.31808	3.35136	9.2848	2.61953	0.0146605	5.22439	-0.105573	-2.81214	2.60099
187	6.16981	3.19689	9.14272	2.84935	0.209273	5.48943	0.306312	-2.37024	2.98287
188	6.0043	3.02489	8.98371	3.031	0.356534	5.70547	0.606071	-2.04102	3.25316
189	5.87454	2.87716	8.87193	3.10282	0.410325	5.79531	0.816542	-1.8118	3.44488
190	5.8828	2.86462	8.90099	2.98367	0.293592	5.67376	0.937665	-1.69279	3.56812
191	5.95195	2.91471	8.98918	2.66505	-0.0118392	5.34194	0.981012	-1.668	3.63002
192	6.06127	3.01756	9.10497	2.08821	-0.584418	4.76085	0.921754	-1.75039	3.5939
193	6.19999	3.15973	9.24026	1.25853	-1.42931	3.94638	0.893812	-1.79306	3.58068
194	6.35332	3.31321	9.39342	0.340742	-2.37572	3.0572	0.866658	-1.8251	3.55841
195	6.53618	3.48545	9.5869	-0.587412	-3.33263	2.15781	0.910487	-1.77254	3.59351
196	6.63295	3.55008	9.71583	-1.43395	-4.19233	1.32443	1.00251	-1.66965	3.67467
197	6.56368	3.44452	9.68284	-2.00647	-4.75128	0.738345	1.06748	-1.6002	3.73516
198	6.41501	3.2799	9.55011	-2.18661	-4.8931	0.519884	1.09886	-1.57481	3.77252
199	6.16574	3.05029	9.2812	-2.02726	-4.69094	0.636412	1.10851	-1.58029	3.7973
200	5.83992	2.78077	8.89906	-1.50185	-4.14104	1.13734	1.00905	-1.70045	3.71855

## Sheet: S1_Panel_C
time	trial 1	trial 2	trial 3	trial 4	trial 5	trial 6	trial 7	trial 8	trial 9	trial 10	trial 11	trial 12	trial 13	trial 14	trial 15	trial 16	trial 17
-99	-0.359852	-0.720064	-0.600372	-0.720139	-0.77986	0.47967	-0.479521	0.178238	0.0589442	-0.119378	-0.540066	-1.20116	-0.841466	-8.35372	1.44202	-0.480033	-0.839859
-98	-0.41998	-0.719997	-0.600218	-0.720139	-0.779876	0.539656	0.180663	0.118116	0.0589442	-0.41895	-0.779925	-1.32129	-1.08243	-6.42925	1.44202	-0.420041	-0.959884
-97	-0.539752	-0.600077	-0.600218	-0.839726	-0.77986	0.420044	0.180987	0.0582093	0.119344	-1.13823	-0.779925	-1.44103	-1.68283	-5.10668	1.14201	-0.360059	-1.19987
-96	-1.01958	-0.420176	-0.78027	-1.73947	-0.599874	0.479582	0.180987	-0.182565	0.179273	-1.13823	-0.480007	-1.44103	-1.6833	-3.54434	1.14164	-0.0600401	-1.31987
-95	-1.07961	-0.420176	-0.78027	-1.73947	-0.299878	0.479582	-0.118986	-0.302736	0.299941	-0.239338	-0.419878	-1.26101	-1.6833	-2.94366	1.14164	-0.0600401	-1.31987
-94	-1.07961	-0.540175	-0.480224	-1.49944	-0.0598955	0.479582	-0.118986	-0.362045	0.299941	-0.179088	-0.480007	-0.900962	-1.14141	-2.52281	1.14192	-0.24002	-1.08
-93	-0.539985	-0.900169	-0.480115	-0.71984	-0.0598955	0.479728	-0.118986	-0.362045	0.299828	-0.239338	-0.779828	-0.900962	-0.721365	-2.16328	1.14214	-0.420104	-0.959879
-92	-0.359939	-0.960052	-0.480115	-0.600325	-0.659851	0.479728	-0.359918	-0.302275	0.118811	-0.77894	-0.899724	-1.02066	-0.660353	-1.44122	1.20222	-0.480091	-0.54008
-91	-0.179908	-1.02003	-0.960372	-0.600325	-0.839863	0.83943	-0.660194	-0.1216	0.0589442	-0.838828	-0.899775	-1.08059	-0.721365	-0.780759	1.44132	-0.840075	-0.479922
-90	-0.0601293	-1.26004	-1.08033	-0.660339	-0.839863	0.899384	-0.720098	-0.1216	-0.000514984	-0.77894	-1.07982	-1.08059	-0.780157	-0.660619	1.44206	-0.960097	-0.54008
-89	-0.179908	-1.56007	-1.08033	-0.660339	-0.95988	0.899384	-0.660194	-1.02355	-0.000514984	-0.118815	-1.07982	-1.14064	-0.780866	-0.660619	1.44132	-1.08012	-0.600007
-88	-0.479793	-1.56007	-0.840356	-0.600408	-0.839861	0.719492	-0.479733	-1.62361	0.540007	-0.118815	-0.899801	-1.68145	-1.56195	-1.08131	1.26081	-1.08012	-0.659913
-87	-0.719782	-1.38008	-0.540195	-0.60038	-0.419911	0.300069	-0.359702	-2.10457	0.540007	-0.119412	-0.479961	-1.68145	-1.56195	-1.20096	0.960491	-0.900074	-0.77986
-86	-0.479793	-1.02003	-0.420211	-0.60038	-0.119897	0.119948	-0.300234	-2.10457	0.539317	-0.779036	-0.120172	-1.50129	-1.322	-1.44134	0.960491	-0.720059	-1.31987
-85	-0.360001	-1.02003	-0.420211	-0.420365	-0.119897	0.119948	-0.300234	-1.62336	0.359237	-1.01866	-0.119983	-1.50116	-0.841037	-1.44134	1.02088	-0.420044	-1.31987
-84	0.239686	-0.840033	-0.780305	-0.420365	-0.6599	0.419964	-0.359244	-0.902562	0.238785	-1.07876	-0.119983	-1.20103	-0.841037	-1.081	1.20041	-0.000105947	-1.25988
-83	0.239686	-0.900027	-0.780305	-0.540046	-0.899874	0.839492	-0.359244	-0.902562	0.178617	-1.01866	-0.479908	-1.14077	-1.02137	-1.08092	1.20041	-0.000105947	-1.19993
-82	0.180017	-0.900027	-0.480269	-0.839703	-0.899874	0.839492	-0.298892	-0.962787	0.178617	-0.239692	-0.599851	-1.14077	-1.08063	-1.08092	1.08048	-0.180034	-1.13992
-81	0.000123829	-1.14003	-0.0600117	-1.37982	-0.599936	0.659743	-0.1196	-1.08254	0.479561	-0.119518	-0.899896	-1.44113	-1.02137	-1.50163	1.08022	-0.660093	-1.07985
-80	-0.419809	-1.62009	0.240078	-1.43983	-0.179861	0.659567	-0.0589129	-1.32307	0.479792	-0.119518	-1.0799	-1.44126	-1.08063	-1.56113	0.900396	-0.780119	-1.01984
-79	-0.77972	-1.62009	0.240078	-1.43983	-0.119942	0.659385	0.54168	-1.32307	0.841096	-0.239169	-1.0799	-1.86209	-1.02058	-1.62141	0.659748	-0.780119	-0.719901
-78	-0.77972	-1.50007	-0.360208	-1.31963	-0.179861	0.420044	0.54168	-1.32292	0.899824	-0.359232	-0.719925	-1.86209	-0.720343	-1.56113	0.659587	-0.420064	-0.599961
-77	-0.359785	-1.02002	-0.780487	-1.07966	-0.179848	-0.18046	0.241556	-1.3226	0.899824	-0.538666	-0.539907	-1.38118	-0.720284	-1.14074	0.659748	-0.420035	-0.599961
-76	-0.119771	-0.780002	-0.900422	-1.07966	-0.41989	-0.18046	0.181026	-1.2627	0.779559	-0.539209	-0.479972	-1.26103	-0.720343	-1.02098	1.26045	-0.420035	-1.01992
-75	0.000138581	-0.780002	-0.900422	-1.25945	-0.839879	0.179798	-0.179807	-1.20275	0.719572	-0.538666	-0.30016	-1.02089	-1.08087	-1.02098	1.50068	-0.840068	-1.01992
-74	0.000138581	-0.780047	-0.360146	-1.43967	-0.839879	0.719461	-0.420586	-1.20275	0.478613	-0.419281	-0.240193	-0.660569	-1.26066	-1.44128	1.56062	-0.840072	-1.07993
-73	-0.479743	-0.840037	-0.240094	-1.43967	-0.659863	1.07946	-0.660283	-1.56289	0.118629	-0.239477	-0.240193	-0.660569	-1.3818	-1.44128	1.50068	-0.900074	-0.839977
-72	-0.599981	-0.900062	-0.240094	-1.07982	-0.599936	1.07946	-0.660283	-1.86304	-0.000806451	-0.239477	-0.359751	-1.20055	-1.56227	-1.56121	1.07958	-0.840072	-0.839977
-71	-0.779732	-1.02002	-0.300163	-0.720271	-0.599936	0.479756	-0.539942	-1.86304	-0.000806451	-0.239338	-1.0198	-1.3807	-1.56227	-1.26099	0.899058	-0.480057	-0.59997
-70	-0.779732	-1.02002	-0.840407	-0.720271	-0.659873	0.0602187	-0.179636	-1.56294	0.840937	-0.239338	-1.07979	-1.44108	-1.56189	-1.02075	0.900549	-0.240056	-0.59997
-69	-0.479696	-1.02002	-0.960234	-1.13988	-0.959913	-0.0599353	-0.179594	-0.902199	1.56238	-0.239338	-1.19987	-1.68147	-0.960477	-0.540483	0.900549	-0.240056	-0.659871
-68	-0.239715	-0.720048	-0.960234	-1.13988	-1.07988	0.0602187	-0.179594	-0.902199	1.56238	-0.178861	-1.19989	-1.68147	-0.960242	-0.540483	0.961281	-0.480072	-0.659884
-67	-0.239715	-0.720048	-0.600209	-1.13968	-1.07988	0.0600663	-0.179594	-0.782305	1.32158	0.179934	-1.19987	-1.44124	-0.960477	-1.14079	0.961519	-0.480072	-0.659884
-66	-0.239805	-0.840075	-0.300115	-0.959618	-0.899896	0.11967	-0.479521	-0.902022	1.26154	0.179934	-0.479984	-0.840527	-1.02053	-1.50087	0.961519	-0.480072	-0.659884
-65	-0.839851	-0.840075	-0.300115	-0.719864	-0.899869	0.719814	-0.72055	-0.902022	0.84034	-0.179358	-0.000107288	-0.660525	-1.62157	-1.56127	1.02069	-0.720116	-0.839876
-64	-0.959684	-0.779989	-0.900409	-0.540338	-0.659856	0.779885	-0.72055	-1.02209	0.479962	-0.539142	0.240066	-0.660525	-1.62157	-1.50087	1.02069	-1.02009	-0.839876
-63	-1.01963	-0.779989	-1.20041	-0.719864	-0.539913	0.779885	-0.480081	-1.02209	0.479962	-0.659138	0.35966	-0.900506	-1.56158	-1.14127	1.02069	-1.02009	-0.359935
-62	-0.959684	-0.839998	-1.26063	-0.960141	-0.539854	0.360004	-0.120075	-0.902289	0.599769	-0.718739	0.539888	-1.08111	-1.08205	-0.840585	0.899928	-0.900081	-0.299843
-61	-0.779767	-0.839998	-1.20041	-0.960141	-0.539913	0.120207	0.0603828	-0.902199	0.599769	-0.718739	0.599689	-1.08111	-1.08205	-0.840561	0.539819	-0.600077	-0.0600827
-60	-0.539765	-0.599975	-0.780353	-0.959989	-0.659891	0.120157	0.541458	-0.661453	0.480518	0.000512749	0.599689	-1.32091	-1.08205	-0.840561	0.539819	-0.180182	-0.0600827
-59	-0.419877	-0.599975	-0.780353	-0.959892	-0.779879	0.120157	0.600748	-0.60206	0.359986	0.000512749	0.299666	-1.32091	-1.14086	-1.20084	1.02113	-0.120181	-0.599952
-58	-0.419877	-0.66	-0.780353	-0.360057	-0.959892	0.119921	0.600748	-0.60206	0.359986	0.000405908	-0.180057	-1.14082	-1.14086	-1.80108	1.02113	-0.0600564	-0.65998
-57	-0.539802	-0.66	-1.02054	-0.360057	-0.959892	0.119921	-0.000133216	-1.02236	0.359872	-0.838585	-0.35991	-0.840403	-1.80122	-1.86154	0.780964	-0.0600564	-0.839986
-56	-0.899706	-0.540035	-1.26046	-0.540366	-0.479901	0.180343	-0.240241	-1.44253	0.359872	-1.07832	-0.359999	-0.840403	-1.80122	-1.86154	0.660781	-0.660044	-0.839986
-55	-0.95982	-0.540035	-1.26046	-0.899499	0.299981	0.180343	-0.359575	-1.56247	0.059647	-1.07832	-0.360049	-0.90068	-1.5624	-1.14041	0.600487	-0.720055	-0.839986
-54	-0.95982	-1.02003	-0.900409	-0.899499	0.299981	0.240259	-0.359575	-1.56247	0.059647	0.0600538	-0.419919	-1.26066	-0.900428	-0.540158	0.540082	-0.72009	-0.839888
-53	-0.659918	-1.38006	-0.900409	-0.660311	-0.71989	0.18017	-0.239587	-1.02227	0.239611	0.300266	-0.419919	-1.44064	-0.719994	-0.540158	0.420358	-0.72009	-0.839888
-52	-0.240011	-1.62011	-0.900298	-0.360668	-0.71989	-0.119797	0.481425	-0.961927	0.600219	0.300266	0.300051	-1.56116	-0.719994	-1.02053	0.540082	-0.360064	-0.540047
-51	-0.240011	-1.62011	-1.0203	-0.360668	-0.599904	-0.119797	0.481464	-0.901978	0.780895	-0.179154	0.300051	-1.56116	-0.841404	-1.02075	0.840857	-0.360064	-0.300024
-50	-0.419905	-1.62008	-0.960323	-0.120884	-0.179941	0.000104159	0.540994	-0.961927	0.780895	-0.179154	0.0601481	-1.32096	-0.961755	-1.20091	0.96013	-0.360069	-0.0599679
-49	-0.659903	-1.44007	-0.960323	-0.360789	-0.179941	0.899415	0.540994	-0.901591	0.419342	-0.0592254	0.0600708	-1.14064	-1.62278	-1.02075	1.02059	-0.480053	0.12
-48	-1.0196	-0.840017	-0.720065	-0.719793	-0.299942	1.07924	0.481235	-0.962508	0.418627	-0.0591914	0.0600708	-0.72021	-1.62278	-0.840377	1.02059	-0.780119	0.12
-47	-1.0196	-0.480008	-0.479981	-0.779974	-0.299942	1.07924	0.48051	-0.961884	0.118931	-0.0592254	0.0600708	-0.179777	-1.62144	-0.840377	0.720723	-0.780119	-0.0598804
-46	-0.959772	-0.480008	-0.479981	-0.779974	-0.119998	0.659196	0.180413	-0.962508	0.0593573	0.179581	0.06001	-0.179777	-1.08111	-1.14074	0.720723	-0.600085	-0.479948
-45	-0.41992	-0.839997	-0.480143	-0.600243	-0.119998	-0.0598332	0	-0.961884	-0.000169873	-0.179749	-2.5928e-05	-0.480281	-1.08057	-1.20091	0.8412	-0.420142	-0.779912
-44	-0.240145	-0.839997	-0.540249	0.179033	-0.119998	-0.0598332	-0.600797	-0.781949	-0.000169873	-0.539243	-0.120217	-1.0204	-1.08005	-1.20091	0.961935	0.0598028	-1.01991
-43	-0.239832	-0.900003	-0.540249	0.179033	-0.0600073	0.0601179	-0.600797	0.0593045	0.359986	-0.539243	-0.180006	-1.0204	-1.08005	-1.20071	1.02188	0.0598649	-1.01991
-42	-0.239832	-0.900003	-0.540249	-0.180041	-0.0600073	0.120157	-0.360408	0.0593045	0.540669	-0.299635	-0.180006	-0.900591	-1.08005	-0.540506	1.02188	0.0598649	-0.779885
-41	-0.35988	-0.960013	-0.540249	-0.420365	-0.179972	0.180041	-0.0599062	-0.120677	0.719163	-0.179822	-0.299831	-0.780464	-1.08028	-0.540506	1.08165	-0.240122	-0.239922
-40	-0.959694	-0.960013	-0.480182	-0.839938	-0.179972	0.41977	0.48096	-0.601418	0.719163	0.000617802	-0.119861	-0.780464	-0.901393	-0.480264	1.08165	-0.840067	0.119876
-39	-0.959694	-0.779995	-0.480143	-0.839938	-0.239898	0.899445	0.60095	-0.721447	0.419342	0.0600538	0.479978	-0.540152	-0.901393	-0.540057	0.90065	-0.840067	0.599863
-38	-0.599787	-0.660062	-0.480143	-0.360379	-0.239898	0.899445	0.660945	-0.721447	0.179037	0.11984	0.779635	0.000112653	-0.4808	-0.540057	0.90065	-0.720086	0.599863
-37	-0.23986	0.239924	-0.420255	-0.180281	-0.719859	0.359756	0.660945	-0.601502	0.179037	0.0600538	0.839683	0.00033617	-0.360055	-0.540158	0.840301	-0.480102	0.419936
-36	-0.23986	0.299816	-0.240103	-0.000885352	-0.899884	0.299936	0.541421	-0.601336	0.540724	0.000297725	0.839683	0.0602737	-0.360055	-1.20054	0.661506	-0.240143	-0.179991
-35	-0.239752	0.239924	-0.240131	-0.000885352	-0.899884	0.179741	0.540753	-0.481187	0.540724	0.000297725	0.599773	0.0602737	-0.600481	-1.26063	0.661506	0.119783	-0.419824
-34	-0.239964	0.120023	-0.180033	-0.480297	-0.299922	0.179741	0.180539	-0.300584	0.540231	0.00044167	0.299782	-0.180056	-0.660589	-1.26063	0.661506	0.119783	-0.479897
-33	-1.13973	-0.0600345	-0.0600752	-1.19952	6.4373e-05	0.539656	0.0598606	-0.300584	0.540231	0.300042	0.239786	-0.480187	-0.660589	-0.300381	0.119771	0.0599313	-0.479897
-32	-1.13973	-0.600011	-0.0600752	-1.3194	6.4373e-05	0.719552	-0.000267327	-0.661453	0.779268	0.359866	0.239637	-0.780285	-0.719766	-0.300381	0.060406	-0.420082	-0.719973
-31	-1.13973	-1.02002	-0.960335	-1.31946	-0.179941	0.839641	-0.000267327	-0.901302	0.779268	0.359866	0.119928	-0.780285	-0.660649	-0.29988	0.119771	-0.540058	-0.719973
-30	-1.07965	-1.02002	-0.960335	-1.31946	-0.180069	0.719552	0.0603828	-0.961626	0.419342	0.300192	0.119928	-0.600657	-0.66107	-0.359933	0.12014	-0.660055	-0.360003
-29	-0.659669	-0.480008	-0.300163	-0.899879	-0.479923	0.779195	0.300443	-0.961626	-0.00110328	-0.119483	0.299829	0.059824	-0.660649	-0.479947	0.420409	-0.660055	-0.23984
-28	-0.539728	0.479789	0.119985	-0.840353	-0.599865	0.659743	0.600623	-0.961376	-0.121624	-0.23927	0.719921	0.059824	-0.481102	-0.479947	0.660377	-0.660046	-0.23984
-27	-0.539728	0.479789	0.119985	-0.899879	-0.779888	0.779195	0.781552	-0.300255	-0.121624	-0.119483	0.899488	-0.0600189	-0.481102	-0.420102	0.420409	-0.420028	0.0601327
-26	-0.539752	0.599875	-0.420063	-0.959798	-0.779888	0.659597	0.781552	-0.1202	0.359058	0.240064	0.899488	-0.360222	-0.961197	0.0600547	0.299746	-0.180043	0.000112541
-25	-0.719782	0.599875	-0.720235	-0.959798	-0.659863	0.419882	0.421317	-0.1202	0.359929	0.479703	0.959826	-0.540379	-0.961197	0.360173	0.120088	-0.0600743	0.000112541
-24	-0.779582	0.599875	-0.780248	-0.899927	-0.0599813	0.419882	0.420925	-0.720542	0.359929	0.479703	0.959826	-0.600462	-0.660005	0.360173	-0.181341	-0.0600743	-0.0599786
-23	-1.07961	0.539978	-0.780248	-0.779806	-0.0599813	0.719461	0.420925	-0.720542	0.179096	-0.299184	0.599806	-0.600525	-0.660005	-0.360006	-0.181341	-0.0600873	-0.0599786
-22	-1.07961	0.119963	-0.540175	-0.540021	-0.899879	0.719954	0.360931	-0.420723	0.0580895	-0.299184	0.539606	-0.600525	-0.77987	-0.600216	0.0595656	-0.180191	-0.0599786
-21	-1.01972	-0.180013	0.119977	-0.539824	-0.959872	0.719954	-0.0594378	-0.420723	-0.00152707	-0.0595736	0.239963	-0.420545	-0.77987	-0.600216	0.420612	-0.360016	-0.359973
-20	-0.839719	-0.300036	0.119977	-0.539824	-0.899879	0.000129864	-0.30037	-0.180785	-0.1209	0.779667	0.0598454	-0.240093	-0.539348	-0.540158	0.96104	-0.660045	-0.54008
-19	-0.479859	-0.300018	-0.0602505	-0.899739	-0.719898	-0.119872	-0.30037	-0.180785	-0.1209	0.839233	-0.180044	0.120177	-0.238795	-0.420122	1.14116	-0.660045	-0.54008
-18	-0.479755	-0.300018	-0.960464	-0.899739	-0.719855	-0.119872	0.0606331	0.119561	0.119863	0.839233	-0.180044	0.120177	-0.238795	-0.300127	1.14116	-0.240115	-0.420047
-17	-0.240127	0.359825	-1.32041	-0.839938	6.4373e-05	0.000558347	0.0606331	0.119561	0.420086	0.539719	0.119811	-0.0599688	-0.238795	-0.300127	0.419567	-0.180157	-0.420047
-16	-0.359867	0.719934	-1.32041	-0.480163	6.4373e-05	0.360311	0.0606331	0.0593805	0.539317	0.000370145	0.359728	-0.0601235	-0.238795	-0.300127	0.119284	-0.12011	-0.719948
-15	-0.359867	0.719934	-0.900477	-0.480163	-0.239876	0.360311	0.300401	-0.360962	0.539317	0.000333935	0.659665	-0.0601235	-0.238795	-0.360269	0.119284	-0.12011	-1.19989
-14	-0.419733	0.41996	-0.420189	-0.480033	-0.599904	1.01957	0.300401	-0.420877	0.539258	0.000333935	1.01935	-0.120055	-0.539626	-0.360269	0.119284	-0.180174	-1.19993
-13	-1.0796	0.419951	-0.420169	-0.480521	-0.599948	1.01957	-0.00017792	-0.420877	0.237924	0.239873	1.13922	-0.120107	-0.660471	-0.000116229	0.358858	-0.600042	-1.19989
-12	-1.0796	0.300024	-0.360208	-0.779559	-0.599948	1.01945	-0.0597337	0.0595298	0.178617	0.359788	1.13922	-0.120107	-0.660471	0.0600547	0.719952	-0.600042	-0.959921
-11	-0.779709	-1.92225e-05	-0.360208	-0.779559	-0.419928	0.659714	-0.0597337	0.0595298	-0.000631213	0.359788	0.539918	-0.12002	-0.239563	0.360225	1.02161	-0.240077	-0.599952
-10	0.11999	-0.300099	-0.600334	-0.65985	-0.240011	0.239895	0.600498	-0.0601691	-0.180362	3.7998e-05	0.179992	-0.12002	-0.23912	0.540134	1.02161	-0.11999	0.179901
-9	0.479847	-0.419977	-0.720268	-0.300121	-0.239949	0.239895	0.661142	-0.360767	-0.180362	-0.000348687	0.179992	-0.12002	-0.238903	0.540134	0.420612	-1.22935e-05	0.420092
-8	0.479847	-0.419983	-0.900477	-0.12058	-4.64916e-05	0.240055	0.661142	-0.420498	0.240178	-0.000348687	0.239722	-0.0600877	-0.118183	0.300139	-0.000807345	0.120009	0.420092
-7	-0.179923	-0.419977	-0.900477	-0.12058	-4.64916e-05	0.35967	0.661142	-0.420498	0.479792	0.0001131	0.239949	0.120101	-0.118183	-0.24021	-0.421359	0.120009	-0.119791
-6	-0.779804	-0.300036	-0.540271	-0.479982	-0.0599357	0.420275	0.540955	-0.360393	0.53955	0.00044167	0.479877	0.120101	-0.299554	-0.24021	-0.421359	-0.420041	-0.359861
-5	-0.779804	0.119798	-0.540271	-0.660048	-0.29986	0.779968	0.420516	-0.180447	0.719858	0.479583	0.779774	-0.240164	-0.299554	-0.0599599	0.419459	-0.420041	-0.419824
-4	-0.719957	0.119878	-0.540271	-0.719986	-0.539872	0.779968	0.180112	-0.180374	0.53955	0.539719	1.49912	-0.600263	-0.179405	0.300386	0.960942	-0.240077	-0.599888
-3	-0.599907	0.719704	-0.480355	-0.719986	-0.29986	0.659537	0.180025	-0.180447	0.358999	0.839522	1.49912	-0.600263	0.120988	0.420173	0.960942	-8.47131e-05	-0.599888
-2	-0.0599165	0.719704	-0.240192	-0.300565	-0.0599501	0.419854	-0.0605813	-0.180374	0.299771	0.839522	0.659751	-0.480242	0.360171	0.420173	0.660066	0.0599179	-0.359833
-1	-0.000171214	0.299958	-0.180091	0	0	0.239699	-0.0605813	-0.0604221	0	0.71961	0.239771	-0.420358	0.360171	0	0	0.0599179	0
0	-0.000171214	0	-0.180091	0	0	0.239699	-0.0601709	-0.0604221	0	0.420112	0	0	0.180815	-0.0598866	0	0.120017	0.000164509
1	-0.179822	-0.119969	-0.300048	-0.0602529	-0.599961	0.119921	0	-0.661047	0	0.420112	-0.23984	0.000187755	0.180815	-0.120133	0.120192	0.17985	0
2	-0.41998	-0.119988	-0.360166	-0.480136	-0.7799	0.360211	0.0597256	-0.960976	-0.240698	0.839841	-0.23984	0.30035	0.36106	-0.18011	0.660929	0.299843	-3.45893e-05
3	-0.420027	-0.359966	-0.540396	-0.480136	-0.7799	0.419626	0.781249	-1.08157	-0.240698	0.839841	-0.179993	0.30035	0.36106	-0.120133	0.780914	0.299843	-0.0601078
4	-0.41998	-0.359966	-0.600252	-0.120464	-0.599967	0.659626	0.781249	-0.960976	-0.120606	0.359788	-9.29832e-05	0.00015825	-0.240484	-0.0600743	1.20086	0.299843	-0.419937
5	-0.23986	-0.180066	-0.600252	0.0594049	-0.240011	0.659626	0.781171	-0.780878	0.0592393	0.299533	-9.29832e-05	-0.180126	-0.359998	0.300068	1.20086	0.17993	-0.420036
6	0	0.299878	-0.360146	0.359681	-0.240011	0.179853	0.781133	-0.419997	0.11992	3.7998e-05	0.239907	-0.299912	-0.240484	0.359911	1.14136	0.0599778	-0.419937
7	0.239782	0.419742	-0.240076	0.359681	-0.240011	0.179853	0.720778	0.119744	0.11992	3.7998e-05	0.239907	-0.600263	0.181566	0.359911	1.14136	0.0599778	-0.359813
8	0.239782	0.419835	-0.240076	0.359624	-0.119935	0.419742	0.479634	0.119744	0.11992	0.240176	-0.180227	-0.600263	0.541088	-0.300314	1.08063	0.119965	-0.359785
9	-8.31485e-05	0.419742	-1.14043	-0.180227	-0.119935	0.539656	0.479634	0.0599259	-0.300223	0.779299	-0.240193	-0.300111	0.661178	-0.300314	0.600178	0.359905	0.0600115
10	-0.000118017	0.299974	-1.68103	-0.600325	-0.299922	0.539656	0.660864	-0.66133	-0.541715	0.779299	-0.180227	0.360503	0.661178	-0.060094	0.300424	0.419923	0.359911
11	-0.359825	0.239887	-1.68103	-0.600325	-0.419935	0.539656	0.900843	-0.961174	-0.601825	0.719282	0.239688	0.360503	0.240247	0.540222	0.300424	0.419967	0.359911
12	-0.359825	-0.0600149	-1.50097	-0.479932	-0.419935	0.659828	0.901004	-0.961174	-0.661322	0.659431	0.239688	0.300199	0.18037	0.660287	1.08102	0.419967	0.300111
13	-0.120123	-0.180059	-1.3807	-0.000406131	-0.419935	0.659828	0.961235	-0.721283	-0.601825	0.35963	0.119955	0.120235	-0.419816	0.960467	1.08102	0.179908	-0.0597397
14	0.359438	-0.180059	-1.08051	0.0595222	-0.119964	0.359812	1.08149	-0.480755	-0.240465	0.0600158	0.119955	-0.119846	-0.41993	0.960467	1.02132	0.119913	-0.179771
15	0.359438	-0.0600716	-0.420169	-0.000406131	-0.119964	0.0602187	0.961723	-0.180124	-0.0604445	0.35963	0.239722	-0.480133	-0.419816	0.360121	0.840857	0.119898	-0.0597741
16	0.24025	0.179956	-0.420169	-0.24058	-0.299948	0.0602187	0.961723	-0.180124	-0.0604445	0.719529	0.599723	-0.540301	0.240247	-0.180091	0.239266	0.119898	-0.0598546
17	-0.0597744	0.299915	-0.840447	-0.360188	-1.07988	0.359895	0.540875	-0.601054	-0.0605017	0.719569	0.599723	-0.660442	0.240247	-0.240317	0.0593483	0.480003	-0.0597741
18	-0.539802	0.479969	-1.32059	-0.839938	-1.07988	0.899715	0.481425	-0.721041	-0.120547	0.719529	0.479847	-0.540301	0.120379	-0.240317	0.0593483	0.480003	-0.0598546
19	-0.539802	0.539886	-1.32059	-1.20025	-0.959945	0.899715	0.240658	-0.841188	-0.541168	0.299733	0.479831	-0.420062	-0.119304	0.119997	0.239211	0.480003	-0.119785
20	-0.539777	0.539886	-0.900463	-1.20025	-0.539893	0.719552	0.240658	-0.841188	-0.602648	0.299733	0.119764	-0.0596917	-0.119304	0.60027	0.539977	0.719845	-0.119785
21	-0.479819	0.300017	-0.420392	-0.360493	-0.119998	0.419882	0.300485	-0.0603488	-0.602648	0.359827	-0.060191	0.420356	-0.23923	0.780317	0.600838	0.719845	0.180108
22	-0.359939	5.99027e-05	-0.420222	-0.000948608	-0.119998	0.30037	0.961686	0.000136793	-0.361694	0.539273	-0.120172	0.420356	0.0605008	0.780317	0.600838	0.600027	0.180118
23	-0.000135452	-0.180008	-0.360119	-0.000948608	-0.299934	0.180343	1.02103	0.120024	-0.361694	1.19842	-0.060191	-0.119987	-0.180202	0.600203	0.36121	0.539986	0.180108
24	-0.000135452	-0.420013	-0.360119	-0.240669	-0.419954	0.0600138	1.02103	0.000136793	-0.361694	1.19842	0.0599974	-0.480206	0.0605008	0.600203	0.36121	0.240056	-0.119849
25	-0.179893	-0.420013	-0.780206	-0.540366	-0.599924	0.0600138	0.840807	-0.180338	-0.360097	0.89966	0.0599974	-0.780157	-0.118975	0.600203	0.66146	0.180039	-0.119849
26	-0.480006	-0.41998	-1.02031	-0.660177	-0.599924	0.0600138	0.780397	-0.660736	-0.180768	0.0602397	-0.120172	-0.780285	0.0613198	0.600168	0.66146	-0.360025	-0.119849
27	-0.659918	-0.299976	-1.02031	-0.660177	-0.30001	0.0600663	0.420218	-0.660736	-0.180768	-0.119661	-0.120172	-0.780157	0.120988	0.600168	0.720266	-0.360025	-0.179815
28	-0.659918	-0.179964	-0.900275	-0.540652	-0.119922	0.18027	0.300734	-0.660473	-0.240639	-0.119661	-0.0600493	-0.179848	0.120988	0.900468	0.720266	-0.360025	-0.179815
29	-0.239979	-0.119935	-0.900275	-0.420365	-0.119922	0.959671	0.300734	-0.360357	-0.661628	0.83876	-0.0600493	-0.12009	-0.240484	1.02051	0.780666	-0.120039	0.120023
30	-0.239979	0.299966	-1.02031	-0.241139	-0.299904	0.959671	0.48051	-0.0596917	-0.661628	0.83876	-0.179946	-0.12009	-0.360702	1.02051	0.780666	-0.060035	0.539961
31	-0.180099	0.300004	-1.14035	-0.420365	-0.419917	0.12008	0.60095	0.240118	-0.361571	0.719282	-0.299841	-0.0599688	-0.540789	0.78044	0.359683	0.359814	0.720151
32	-0.359867	0.300004	-1.68095	-0.840063	-0.479935	-0.239774	0.720859	0.240118	-0.0615138	0.0597069	-0.360036	0.0600019	-0.540789	0.66027	0.119008	0.599952	0.780023
33	-0.180099	-0.119948	-1.74086	-0.840063	-0.479935	-0.239774	0.961539	-0.720655	-0.060795	-0.000270009	-0.360036	-0.0599688	-0.360055	0.600484	-0.1209	0.599952	0.720151
34	-0.360049	-0.299939	-1.68095	-0.660284	-0.6599	0.0603884	0.961539	-0.720655	-0.00128388	-0.239692	-0.180182	-0.780285	0.000787675	0.420189	-0.1209	0.359913	0.480219
35	-0.659701	-0.779992	-1.62064	-0.00085406	-0.479935	0.359923	0.90068	-0.841147	-0.060795	-0.239692	0.119942	-0.780285	0.120715	0.420189	0.178998	0.0599827	0.0602755
36	-0.659701	-0.900009	-1.20046	0.179001	-0.479891	0.719926	0.720487	-0.601095	-0.181426	-0.0601691	0.179791	-0.54034	0.120715	1.02056	0.599864	0.0599827	0.0001725
37	-0.59975	-0.900014	-1.20046	0.179001	-0.299904	0.719926	0.720487	-0.480755	-0.361267	0.719406	0.179939	-0.420149	0.120323	1.02056	0.839883	0.479872	-0.11974
38	-0.540017	-0.900009	-1.50062	-0.00110976	-0.479891	0.300043	0.720188	-0.120639	-0.542405	0.719406	0.179939	-0.239793	0.120323	0.480257	0.839883	0.539979	-0.11974
39	9.43243e-05	-0.659995	-1.62064	-0.180931	-0.539923	0.300043	0.480125	-0.120639	-0.542405	0.479421	0.179939	0.300375	0.179562	0.300103	0.359843	0.719875	0.180228
40	9.43243e-05	-0.239957	-1.62064	-0.72038	-0.719906	0.300043	0.480125	-0.180447	-0.241052	0.179972	0.59974	0.360245	0.180313	0.300103	-0.000479221	1.25984	1.01999
41	-0.0601114	0.239941	-1.56048	-0.72038	-0.719906	0.120207	0.540462	-0.180447	-0.18155	0.179972	0.59974	0.360245	0.601187	0.480337	-0.0600967	1.37999	1.25987
42	-0.47993	0.239941	-1.32059	-0.660593	-0.0599501	0.000279173	0.720317	-0.0599599	-0.18155	0.539356	0.299631	0.23999	0.720843	0.780395	-0.0600967	1.37999	1.49963
43	-0.47993	0.180063	-0.900395	-0.600164	0.0601351	0.120207	1.08079	-0.0597909	-0.241658	0.839358	-5.23031e-05	0.0602469	0.720843	0.780395	0.299905	1.07993	1.61964
44	-0.599951	-0.299958	-0.900395	-0.000463352	0.0601351	0.180415	1.08079	0.000369251	-0.542986	0.839358	-5.23031e-05	-5.0962e-05	0.601611	0.360385	0.840857	1.01985	1.61964
45	-0.419877	-0.539977	-1.02044	-0.000463352	0.0600985	0.839982	1.02134	0.0600296	-0.662506	0.659431	0.359761	-0.120037	0.420998	0.180194	0.960743	0.659998	1.19977
46	-0.360049	-0.600015	-1.02044	-0.120884	0.0600851	0.839982	0.901763	0.000369251	-0.843047	0.0600913	0.839883	-0.120107	-0.359432	-0.180255	1.50146	0.35988	0.540024
47	0.239744	-0.600015	-0.840284	-0.481038	-0.479844	0.539883	0.841803	-0.180193	-0.843047	-0.180086	0.839883	-0.120107	-0.359432	-0.300404	1.50146	0.35988	0.300168
48	0.239744	-0.840041	-0.780316	-0.78071	-0.479844	0.420071	0.661486	-0.180338	-0.602519	-0.180086	0.719844	-0.23988	-0.299497	-0.300404	1.44237	0.599989	0.300168
49	0.119887	-0.840041	-0.720389	-0.900259	-0.299942	0.420071	0.420885	-0.36032	-0.542343	0.120032	0.719844	-0.42044	-0.239451	0.119879	0.840857	1.13988	0.480114
50	-0.120006	-0.59999	-0.54011	-0.900259	0.120125	0.659447	0.420885	-0.480454	0.299597	0.779626	0.719844	-0.42044	0.180925	0.66044	0.599703	1.19977	0.660024
51	-0.180082	-0.180097	-0.54011	-0.54015	0.120125	0.720035	0.60095	-0.480454	0.540286	0.779626	0.539728	-0.119922	0.420723	0.66044	0.599703	1.31973	0.660199
52	-0.180082	0.11997	-0.900146	0.059161	0.120112	0.720035	0.60095	-0.180193	0.540286	0.779464	0.239818	0.120207	0.420723	0.600441	0.720623	1.49975	1.14017
53	-0.179923	0.420014	-1.08033	0.059161	0.0600073	0.179962	0.540504	0.480462	0.0590032	0.53964	-0.359987	0.360327	0.300852	0.480171	1.20159	1.49975	1.44017
54	-0.179923	0.540059	-1.08033	-0.120791	-0.239916	-0.179571	0.480594	0.72111	-0.182235	0.419844	-0.359987	0.36034	0.300852	0.179976	1.38242	1.08	1.44017
55	-0.179923	0.540059	-0.720137	-0.420565	-0.299837	-0.179571	0.420174	0.72111	-0.241907	0.53964	-0.300118	0.360327	0.300852	-0.000116229	1.50215	1.08	1.20011
56	-0.0599165	0.300004	-0.720137	-0.660257	-0.299837	0.299854	0.240574	0.0600296	-0.422242	0.479623	-0.180018	-0.540015	0.240806	-0.179937	1.50215	1.07998	1.20011
57	-6.61612e-05	0.180067	-0.720155	-0.660257	-0.839933	0.300016	-0.0591919	0.0600296	-0.541531	0.719365	0.179677	-0.600171	0.0610515	-0.179937	1.26235	1.19991	1.25997
58	-6.61612e-05	-0.359973	-0.960245	-0.541053	-0.839933	0.420044	-0.0591919	0.17995	-0.541531	0.659472	0.779616	-0.660136	0.0610515	-0.000116229	1.08165	1.19991	1.25997
59	-6.61612e-05	-0.659986	-0.960245	-0.0614968	-0.119902	0.719522	0.301211	0.240219	-0.541531	0.899416	1.13956	-0.660136	0.421373	-0.000116229	0.960942	1.43965	1.20015
60	0.0597663	-0.659986	-0.960245	-0.0614968	-0.119902	0.899445	0.360267	0.780662	-0.179964	0.659472	1.13956	-0.599877	0.841313	-0.120093	0.960942	1.43965	1.20015
61	0.0597663	-0.479968	-0.960185	-0.240729	-0.11989	1.07898	0.420474	0.780662	-0.120145	0.719241	0.959809	-0.359691	0.841313	-0.120093	1.20081	1.43981	1.20015
62	0.0597663	0.119985	-0.780131	-0.540926	-0.239941	1.07918	0.420474	0.660417	-0.000112653	0.5396	0.959741	-0.239687	0.721542	-0.120215	1.32119	1.37993	1.2599
63	0.119642	0.12004	-0.780131	-0.720436	-0.299883	1.07898	0.540834	0.0600296	0.0597042	0.719241	0.719729	0.300399	0.721542	-1.78814e-05	1.44161	0.900023	1.2599
64	0.539841	0.359915	-1.02024	-1.32046	-0.479896	0.719926	0.661182	0.0597847	0.0597042	0.5396	0.35987	0.600506	0.902385	0.0603122	1.44161	0.479925	1.73961
65	0.539841	0.360068	-1.20043	-1.32046	-0.479896	0.359728	1.02123	-0.059824	-0.241052	0.718943	0.359808	0.600506	0.902385	0.0603122	1.44156	0.479925	1.97961
66	0.0596505	0.360068	-1.20043	-0.900232	-0.0598955	0.359728	1.08126	-0.059824	-0.241052	0.539837	0.359808	0.300271	0.84126	-0.180012	0.960793	1.01994	2.03974
67	-0.240235	0.539876	-0.42004	-0.720464	0.299991	1.13969	1.32195	0.300411	-0.42066	0.718943	0.599723	0.300271	0.601559	-0.60055	0.960234	1.61966	2.21974
68	-0.240235	0.360005	0.119961	-0.540864	0.360052	1.25935	1.50232	0.420337	-0.240235	0.839149	0.599773	0.240454	0.601559	-0.840291	0.960234	1.79959	2.27972
69	-0.120212	0.239858	0.119961	-0.540864	0.360052	1.25935	1.56238	1.02121	-0.240235	0.89925	1.13944	0.240454	0.601559	-0.840291	0.960234	1.85957	2.27972
70	0.0598401	-0.24001	-0.300048	-0.720786	0.18003	1.13944	1.56238	1.02121	-0.000341535	0.959183	1.13944	0.00017345	0.901726	-0.360312	0.961186	1.85957	2.04007
71	0.179808	-0.29998	-0.780167	-0.900739	0.18003	0.8397	1.20196	0.960833	-0.000341535	0.959392	1.07951	0.00017345	0.901726	0	1.02103	1.67951	1.97995
72	0.239744	-0.300013	-0.840381	-0.960299	0.48004	0.8397	0.961795	0.300845	0.0599313	0.959392	0.719567	0.240321	1.02192	0.300068	1.14026	1.37975	1.92006
73	0.239744	-0.300013	-0.840381	-0.960299	0.719884	1.13941	0.781478	0.300845	0.000168085	0.959835	0.179952	0.540423	1.02192	0.300068	1.14026	1.37975	1.92006
74	-0.000100583	-0.0599854	-0.540383	-0.181391	0.899921	1.37906	0.781478	0.360752	0.000168085	1.31859	-0.000241846	0.840686	0.721436	-0.179937	1.13979	1.55958	1.98013
75	-0.239903	0.299888	-0.480235	-0.0611912	0.899988	1.37906	0.900883	0.540616	0.000168085	1.3189	-0.000241846	1.02067	0.721436	-0.179937	1.13979	1.61961	2.16011
76	-0.539897	0.719862	0.18008	-0.0611912	0.899988	1.31901	0.901278	1.02109	0.0601566	1.3189	0.239848	1.20062	0.841044	-0.0602388	1.26066	1.91949	2.33965
77	-0.839826	0.719862	0.18008	-0.421087	0.660054	1.13944	1.20206	1.02109	0.0601566	1.07909	1.0198	1.20062	0.90188	0.360242	1.44022	2.21941	2.33965
78	-0.839826	0.479855	-0.480213	-0.540989	0.599969	1.13944	1.38262	0.840468	0.0601012	0.659472	1.0198	0.720593	1.14067	0.480413	2.10168	2.45943	1.85984
79	-0.539829	0.479855	-0.720072	-0.600848	0.599969	0.899686	1.50242	0.600054	0.0601012	0.659472	0.899894	0.660666	1.62173	0.600551	2.64311	2.63943	1.85984
80	0.179826	0.540018	-0.720072	-0.540989	1.13999	0.839582	1.38262	0.600054	0.421277	0.779505	0.839769	0.300468	1.863	0.600551	2.64311	2.63943	1.91987
81	0.359567	0.540018	-0.720072	-0.300836	1.31979	0.839582	1.2023	0.960864	0.421277	1.31895	0.719844	-0.0597999	1.92256	0.0600922	2.2829	2.33984	1.97968
82	0.539706	0.359934	-0.359996	0.238548	1.31979	1.01977	1.20185	1.3209	0.299883	1.31933	0.719641	-0.0597999	1.863	0.0600922	2.04191	2.03992	1.97968
83	0.539706	0.300004	-0.360036	0.238548	0.839851	1.13919	0.960959	1.50089	0.179966	1.31933	0.719844	0.540423	1.62264	0.120295	1.44038	1.56002	2.81961
84	0.419741	0.359934	-0.300033	-0.720816	0.540021	1.55851	0.960959	1.50089	0.179966	1.01985	0.839591	0.960559	1.62264	0.300429	1.38028	1.56002	2.87936
85	0.419662	0.599895	-0.300033	-0.720816	0.540002	1.55851	1.08153	1.20054	0.179966	1.01881	1.13974	1.08068	1.68203	0.480498	1.38028	2.21991	2.87936
86	0.419662	0.959963	-0.180091	-0.48107	0.540002	1.19921	1.38209	1.20054	0.179565	1.01907	1.37979	1.14078	1.68253	0.480498	1.80084	2.39972	2.93949
87	0.719469	1.01993	-0.180091	0.0590667	0.479954	1.19921	1.92272	1.20054	0.11992	1.01907	1.49921	1.14078	2.04278	0.480511	2.34193	2.39972	2.93949
88	0.959648	1.07997	-0.180091	0.297984	0.479954	1.13929	2.04302	1.14073	0.179565	1.19929	1.4993	1.02054	2.16375	0.48047	2.34193	2.51965	2.87958
89	1.13951	1.07997	0.120085	0.298134	1.02005	1.13929	2.04302	1.14073	0.238965	1.79805	1.49921	0.720432	2.52375	0.540383	1.74194	2.39966	2.39971
90	1.25921	1.01999	0.240055	0.297984	1.02005	0.839787	1.86262	1.38102	0.299998	1.79805	1.43935	0.720432	2.52375	0.540383	1.74194	2.33968	1.85987
91	1.37959	0.540053	0.240055	0.298134	1.01991	0.839787	1.74217	1.56137	0.419106	1.55923	1.07962	0.720544	2.46363	0.720537	1.80238	2.27943	1.85987
92	1.37959	0.539886	-9.92417e-05	0.178175	1.01991	1.07967	1.5028	1.7416	0.419106	1.43867	0.959724	1.08072	2.04344	0.960684	1.86229	2.27943	1.97986
93	1.07969	0.539886	-0.0600341	0.0586382	1.02	1.25909	1.08179	1.7416	0.419106	1.43867	0.959706	1.38086	1.92265	1.32072	2.04232	2.75922	2.21999
94	1.07941	0.719817	-9.92417e-05	0.0586382	1.07989	1.43894	1.08179	1.86125	0.239611	1.97838	0.959706	1.50078	1.92265	1.32072	2.40272	2.81917	2.69958
95	1.07969	0.839871	0.0600108	0.238372	1.43993	1.25909	2.22277	1.86125	0.239203	2.03899	1.19966	1.50078	1.92318	1.32072	2.52308	2.93934	3.11947
96	1.43894	1.4398	0.240015	0.238372	2.03987	0.899597	2.58249	2.16178	0.239319	2.03899	1.49955	1.3808	1.92318	1.02068	2.52308	3.29919	3.11947
97	1.43923	1.67987	0.360103	-0.0616731	2.09939	0.899597	2.58287	2.4017	0.179273	1.6787	1.79965	1.26072	1.92322	1.02068	2.46337	3.41899	3.11951
98	1.43923	1.80002	0.360103	-0.0616731	2.09939	0.899537	2.82331	2.46177	0.239085	1.61886	1.79965	1.26072	2.40381	1.44092	1.92228	3.41899	2.93962
99	1.43923	1.80002	0.360143	0.058535	1.55971	0.959305	2.88355	2.46177	0.239085	1.37943	1.79954	1.14067	2.94349	1.62088	1.92188	2.81927	2.81999
100	1.37947	1.55985	0.360143	0.238513	1.55971	1.13941	2.82331	1.50115	0.778973	1.37943	1.79954	1.02068	2.94349	1.62095	1.92188	2.75936	2.51992
101	0.959627	1.55985	0.600172	0.65827	1.61982	1.1398	2.58317	1.50115	0.839138	1.79833	1.79954	1.02068	2.82355	1.62088	2.82255	2.75936	2.51992
102	0.959627	1.55989	1.08019	0.65827	1.85967	1.31901	2.04277	1.68103	0.778973	1.91799	1.79954	1.6209	2.70351	1.62081	3.003	3.23922	2.81997
103	1.31942	1.61974	1.08021	0.478329	1.85967	1.31901	1.74266	2.34196	0.899068	1.97782	1.73917	1.74088	2.70351	1.56092	3.06337	3.47903	2.93982
104	1.49926	1.67981	1.14019	0.478293	1.49983	1.13972	1.74266	2.52196	0.719801	1.97782	1.49965	1.8009	3.1846	1.56094	3.06337	3.89863	3.05956
105	1.73904	1.73964	1.20024	0.41824	1.02005	1.07982	2.22307	2.58207	0.779732	1.79746	1.49965	1.86093	3.5444	1.56094	2.82342	3.89863	3.35964
106	1.79892	2.15957	1.20024	0.41824	1.02005	0.959816	2.46315	2.58207	0.719801	1.61832	1.73956	1.86093	3.60528	1.86095	2.46232	3.83861	3.47913
107	1.799	2.75963	1.02022	0.478329	1.25985	0.959816	2.82316	2.10135	0.719744	1.61832	2.33937	1.86085	3.60528	1.98101	2.46232	3.5985	3.47913
108	1.799	2.75963	1.02022	0.59861	1.32004	1.19911	2.82316	1.68126	0.419399	1.85821	2.51896	1.68089	3.12431	2.16101	2.58253	3.5985	3.41955
109	1.49941	2.75952	0.900183	0.897925	1.43996	1.61909	2.58356	1.68126	0.419399	2.27796	2.75846	1.68089	2.94394	2.16101	2.64311	3.59924	3.11981
110	1.49941	2.57944	0.900205	0.897925	1.49988	1.85867	2.58297	1.92119	0.839079	2.27796	2.99832	1.86091	2.9433	1.92099	3.18386	3.65875	3.11971
111	1.73948	2.39966	0.900183	0.35851	1.55995	1.85867	2.46337	1.98164	1.01916	2.27796	3.0583	1.92091	2.9433	1.74091	3.42365	3.65875	3.11971
112	1.79902	2.33973	0.840214	0.178248	1.6198	1.19924	2.46337	2.40189	1.01963	1.91832	2.99832	2.34096	3.36385	1.62086	3.42365	3.71853	3.23941
113	2.15914	2.39939	0.66019	0.178248	1.6198	1.07901	2.76325	2.64217	1.01963	1.85811	2.75909	2.34096	3.66476	1.6209	3.06292	3.59876	3.41931
114	2.57874	2.39939	0.66019	0.238372	0.660045	1.01926	3.0037	2.70198	1.01963	1.85811	2.39915	2.28095	3.66492	1.6209	3.00305	3.41894	3.41946
115	2.57874	2.81919	0.66019	0.238407	0.540082	0.780022	3.12417	2.64217	0.899709	2.5174	2.39915	2.22098	4.0254	2.46108	3.06292	3.23931	3.59914
116	2.33915	2.93932	0.960196	0.5379	0.540082	0.780022	3.12417	2.28165	0.719801	2.51789	2.75901	2.28095	4.0254	2.76111	3.4231	3.23931	3.83907
117	1.85904	3.11932	1.56028	0.657818	1.49991	1.07934	3.36456	2.22163	0.539317	2.5174	2.99884	2.28099	3.9053	2.76111	3.72364	3.53909	4.07929
118	1.61919	3.23941	1.68029	0.5379	1.55964	1.25929	3.54443	2.22163	0.539317	2.33849	2.99884	2.58102	3.60481	2.64109	3.72364	3.77912	4.07929
119	1.61919	3.29946	1.68029	0.238043	1.97961	1.49906	3.54443	2.76206	0.959582	2.21827	2.99884	2.58102	3.60481	2.64109	3.4833	4.01847	3.83933
120	2.03886	3.35941	1.26022	0.238043	2.27954	1.61878	3.06383	2.88229	1.13978	2.21827	3.05901	2.28098	3.60493	2.64109	3.18348	4.31826	3.77931
121	2.21925	3.35941	0.720157	0.298735	2.27954	1.61912	3.06383	2.88229	1.2597	2.39809	3.05901	2.22095	3.78488	2.7011	3.18348	4.31866	3.77931
122	2.27842	3.05952	0.720157	0.597955	1.79979	1.61912	3.30404	2.94217	1.50076	2.45797	2.87886	2.10094	3.90507	2.82112	3.36358	4.31876	3.59916
123	2.27875	2.99923	0.900207	0.898152	1.43999	1.61899	3.30404	2.94217	1.50076	2.39809	2.81882	2.10094	4.02548	2.88113	3.78419	4.31876	3.59916
124	2.27842	2.99923	1.32026	0.898152	1.43991	1.61899	3.2437	2.76204	1.38024	2.27791	2.87886	2.34094	3.90507	2.88113	4.02457	4.31876	3.83891
125	1.97922	3.05952	1.74029	0.837555	1.31979	1.67836	3.2437	2.76204	0.839605	2.03822	2.87917	2.701	3.72561	2.76112	4.02457	4.07883	3.83918
126	1.97922	3.17947	1.74029	0.538089	1.2	2.03835	3.66418	2.76204	0.599188	2.03812	2.93911	2.70103	3.72504	2.22105	3.78408	3.83885	4.13897
127	2.03926	3.71921	1.68027	0.478612	1.2	2.33873	4.32461	2.76209	0.599188	2.03822	3.17854	2.70103	3.48453	2.22105	3.72434	3.71853	4.43913
128	2.21896	4.13933	1.50028	0.478612	1.25992	2.33873	4.32465	3.06221	1.07996	2.63729	3.47841	2.70103	3.24451	2.40109	3.30355	3.71853	4.43916
129	2.87836	4.25903	1.32025	0.658122	2.09943	1.97895	4.32465	3.24252	1.25981	2.69736	3.77818	2.70103	3.24451	2.82112	3.30355	4.55789	4.43916
130	2.99845	4.25903	1.50028	0.958019	2.09943	1.91879	4.08441	3.24252	1.38052	2.69731	3.77818	2.34099	3.48474	3.36114	3.54361	4.91799	4.07911
131	2.99845	4.01941	1.32025	1.19758	1.01983	1.97895	4.08429	3.06227	1.86144	2.81635	3.8984	2.22098	3.96605	3.36114	3.60409	4.91799	4.01893
132	2.33902	4.01898	1.56027	1.19758	1.01983	2.15831	3.96455	3.00202	1.86144	2.69731	3.59859	2.22098	3.96605	3.00113	3.78367	4.1389	4.01893
133	2.33902	3.8387	1.44027	1.0775	1.14005	2.21863	3.6042	2.64226	1.68051	2.81635	3.65855	2.70103	3.84571	2.64111	4.02496	4.13882	4.01893
134	2.51881	3.7191	1.50028	0.778339	1.25998	2.51811	3.60392	2.64226	1.26021	2.45763	3.59859	3.48097	3.66492	2.64109	4.08457	3.71882	3.95875
135	2.57859	3.23947	1.50028	0.778339	1.26012	2.51811	3.60392	2.94239	1.26021	2.8176	3.53869	3.54103	3.66488	2.64111	4.08457	3.71882	3.95875
136	2.87873	3.23947	1.50028	1.07782	1.61986	2.15896	3.60392	3.54268	1.38029	2.5177	3.53869	3.48105	3.66492	2.94113	4.02484	3.89876	4.4982
137	3.17883	3.29963	1.74029	1.43664	1.97985	2.09895	3.66362	3.60263	1.681	2.69684	3.71871	3.48105	3.66539	3.18115	4.02484	4.73771	4.55906
138	3.35792	3.95894	1.8003	1.43699	1.97985	1.97905	3.66387	3.60263	1.80114	2.69684	3.71871	3.24106	4.26546	3.54115	4.44529	4.85804	4.55906
139	3.35792	4.01905	2.04029	1.43699	1.38004	1.85898	4.14435	2.94231	2.4616	2.69684	3.71871	2.82105	4.62537	3.54115	4.50547	4.85804	4.55906
140	3.11845	3.95894	2.70028	1.3771	1.20003	1.97905	4.6848	2.94227	2.52123	2.69674	4.13792	2.82105	4.62537	3.06112	4.50547	4.55789	4.61885
141	2.93818	3.83917	2.70028	1.01811	0.960017	2.39823	4.6848	2.94215	2.52123	2.69674	4.4374	3.36093	4.08505	3.06112	4.38462	4.49771	4.61885
142	2.93818	3.71875	2.52036	0.777929	1.08	2.51763	4.68483	2.94215	2.34083	2.8176	4.4374	3.48095	3.9647	3.18114	4.32435	4.25803	4.19907
143	3.11855	3.59895	2.22035	0.777929	1.08	2.39823	4.68475	2.94215	2.22112	2.93607	4.07829	3.48095	3.72516	3.42114	3.78355	4.25803	3.95897
144	3.11855	2.93946	2.1003	1.0779	1.79985	2.39886	4.56471	2.94227	1.6209	3.11613	3.65792	3.36105	3.36475	3.72111	3.78355	4.07851	3.71937
145	2.75887	2.81962	2.1003	1.73637	1.97977	2.39886	4.3242	3.00239	1.62085	2.93607	3.65792	3.36105	3.36475	3.72115	4.32462	4.25815	3.71909
146	2.69844	2.63981	2.1003	1.73712	1.97977	2.45828	4.08433	3.24259	1.56092	2.93666	4.25802	3.54108	3.54489	3.72115	4.44445	4.25815	3.71909
147	2.51895	2.57979	2.16034	1.97707	1.5	2.45855	4.08433	3.54282	1.56092	2.81689	4.43817	4.08085	3.90491	3.72106	4.44445	4.378	4.01964
148	2.63878	2.63981	2.34027	1.97707	1.37996	2.63853	4.32442	3.54282	1.62014	2.81725	4.558	4.08085	3.96474	3.42114	4.44434	4.55835	4.07932
149	2.51851	2.87943	2.34033	1.55757	0.840188	3.17754	4.98497	3.36263	1.92128	2.81725	4.61792	3.48102	4.08532	3.42114	4.32413	4.55835	4.49913
150	2.21879	3.05911	2.34027	1.37759	0.840188	3.17754	4.98497	3.24258	2.22122	3.17621	4.61825	3.36107	4.14591	3.54113	3.90378	4.55835	4.61908
151	2.03929	3.11912	2.16034	1.31725	1.32003	2.69805	4.92502	3.24258	2.52123	3.41688	4.79776	3.30101	4.14591	3.78114	3.90378	4.61761	4.73807
152	2.03929	3.05911	1.92032	1.37759	1.49997	2.45866	4.80492	3.84294	2.52123	3.41688	4.79776	2.88103	4.08615	4.02108	4.14369	4.61803	4.73807
153	2.21868	2.81953	1.92031	1.6175	1.49997	2.2184	4.68487	3.9629	2.34202	2.81662	4.49798	2.88103	4.08584	4.02108	4.68429	4.67742	4.1987
154	2.21868	2.75938	1.86031	1.61774	1.44002	2.2184	4.44465	3.9629	2.28208	2.45671	4.49798	2.94103	3.84495	4.02108	4.68429	4.79752	4.01918
155	2.03913	2.21953	1.80031	2.03642	1.44002	2.45832	3.96455	3.84281	2.22223	2.45671	4.31848	3.66101	3.36475	3.96111	4.38371	5.27702	3.83915
156	1.97917	2.09961	1.80031	2.03642	1.43994	2.81792	3.78439	3.06243	2.28208	2.69642	4.31848	3.96099	3.36475	3.84111	4.32372	5.27702	3.83915
157	1.55951	1.61962	1.80031	1.61766	1.43999	2.81792	3.78439	3.06243	2.34212	2.81657	4.3182	4.08096	3.66484	3.84111	4.20376	4.97801	3.89932
158	1.49921	1.55971	1.92032	1.61758	1.43999	2.69851	3.78439	3.36254	2.4619	3.35599	4.3182	4.08096	4.14536	4.32106	4.14341	4.73825	4.43894
159	1.49921	1.55971	2.58033	1.61766	1.62001	2.69851	3.72449	3.42254	2.52169	3.4159	4.55846	4.02089	4.20565	4.38108	4.14341	4.31829	4.91885
160	1.97899	1.61975	3.12029	1.97694	1.62011	2.69805	3.72449	3.48258	2.52204	3.4159	5.21792	3.48105	4.26496	4.38108	4.20417	4.31829	4.91885
161	1.97899	1.73969	3.12029	2.03717	1.79991	2.63818	3.84457	3.48258	2.82159	2.93677	5.51783	2.76104	4.26496	3.72109	4.32427	4.25844	4.55886
162	1.61919	1.79989	2.40036	2.03717	1.85991	2.45894	3.84457	3.48256	3.06249	2.5767	5.51783	2.76104	4.08444	3.42109	4.86519	4.3783	4.55881
163	1.25958	2.15966	2.04033	1.97672	1.85991	2.45894	3.72445	3.36235	3.42277	2.5767	4.79804	3.12107	3.54384	3.42109	4.9247	4.31882	4.49918
164	1.13949	2.4593	2.04033	1.91726	1.49991	3.17745	3.66458	3.12231	3.42277	3.41574	4.79804	3.24109	3.54384	4.08113	4.9247	4.37859	4.25908
165	1.07979	2.4593	2.04033	1.55784	1.49991	3.17745	3.66458	3.00243	3.12354	3.41574	4.6783	3.48099	3.54384	4.44092	5.10452	4.37836	3.95939
166	1.0194	1.7996	2.04031	1.55784	1.50007	3.11793	3.54413	3.00243	3.00315	3.35649	4.31839	3.90103	3.60448	4.50091	5.10531	4.37859	3.95934
167	1.0194	1.6799	2.28032	1.55784	2.09965	2.33848	3.54404	3.36266	3.00315	3.1163	4.25825	3.90103	3.78459	4.50098	5.16522	4.67802	3.95934
168	1.55907	1.67974	2.22022	1.6175	2.33972	2.33848	3.06383	3.42282	2.76341	2.93682	4.25825	3.72092	3.78459	4.50098	5.40515	4.6783	4.19912
169	1.61909	1.55971	2.22022	1.85686	2.33972	2.39849	3.00349	3.36266	2.76341	2.93682	4.43797	3.661	3.66504	4.20104	5.40515	4.73791	4.55927
170	1.55907	1.07984	2.22022	1.85686	1.79986	2.57855	2.944	3.3625	3.24271	3.29586	4.85756	3.66097	3.60558	4.02103	5.28452	4.6783	4.85909
171	1.43925	1.07984	2.22028	1.67752	1.67997	2.75822	2.944	3.3625	3.36288	3.29586	5.21738	3.24106	3.60497	4.02103	4.50363	4.43855	4.97875
172	1.07927	2.03937	2.28034	1.55724	1.67991	2.75822	3.24383	3.30256	3.36306	3.23639	5.27769	3.24106	3.6046	4.50106	4.50363	4.31889	4.97875
173	1.07927	2.39912	2.34036	1.55724	1.67997	2.69858	3.24383	3.12237	3.36306	2.576	5.27769	3.24106	3.6046	4.62091	4.68471	4.31889	4.91836
174	1.19917	2.69945	2.34036	1.97741	1.85988	2.33873	3.24383	3.12225	3.0032	2.576	5.15807	3.06106	3.7848	4.62091	4.86471	4.31837	4.79861
175	1.37924	2.93944	2.34036	2.57604	1.86002	2.33873	3.12404	3.12225	3.0032	2.5767	4.55787	3.06106	4.20528	4.14114	4.92516	4.31837	4.55906
176	1.37936	2.93944	2.34029	2.57604	1.86006	2.33873	3.06375	3.24233	3.12295	2.75681	4.37802	3.72101	4.38527	4.02115	4.92525	3.89879	4.55906
177	1.37936	2.21982	2.16031	2.45614	2.03984	2.27838	2.76404	3.42258	3.30334	3.35611	3.959	4.26095	4.38527	4.02115	4.92525	3.89849	4.79839
178	1.19902	2.15984	2.0403	2.15664	1.86006	2.27838	2.76404	3.42258	3.42319	3.35611	3.95883	4.26095	4.32492	4.68093	4.80467	3.77896	4.97831
179	0.89955	1.61986	1.86032	1.91696	1.86007	2.27886	2.64356	3.12252	3.42328	2.75686	3.95874	4.26095	3.90479	4.80083	4.80467	3.77896	5.09885
180	0.89955	1.61986	1.86032	1.73782	1.86007	2.69805	2.6435	2.76223	3.42328	2.75686	3.95874	4.14103	3.5454	4.68093	4.9241	4.37845	5.09902
181	0.95929	1.85987	2.34034	1.73782	1.97999	2.75856	2.6435	2.76223	3.48309	2.99647	4.61805	3.90104	3.5454	4.56109	5.28483	4.9781	5.09885
182	0.959606	2.63928	2.40037	1.91665	2.15996	2.69805	2.94352	2.82229	3.48313	3.0567	5.03754	3.78106	3.90541	4.50111	5.28483	5.27793	5.03889
183	1.01966	2.63928	2.34034	2.09693	2.22002	2.15864	2.94365	2.82235	3.78384	3.1158	5.03814	3.78106	4.20481	4.56109	5.22479	5.51749	4.91888
184	1.25906	2.57952	2.34033	2.09693	2.22002	2.15864	3.06385	3.06239	3.78384	3.11656	5.15769	3.96088	4.20481	4.86111	5.16534	5.51749	4.91888
185	1.43905	2.57936	1.86032	1.6177	1.98002	1.97877	3.42426	3.84272	3.78332	3.11667	5.03814	4.02092	4.20481	4.921	5.04512	5.09817	5.15884
186	1.37909	2.51976	1.86032	1.6177	1.56011	2.09874	3.42426	3.84272	3.78332	3.11667	4.79787	4.02092	4.38568	4.921	5.16534	4.97813	5.15884
187	1.37909	2.21982	2.28035	1.61832	1.49999	2.09874	3.30404	3.66268	3.78332	3.05644	4.5583	4.02094	4.38589	4.50107	5.46545	4.97813	5.27824
188	1.0795	1.85987	2.40028	2.09684	1.26021	2.51875	2.94355	3.60276	3.84366	3.05644	4.31884	4.14089	4.38568	4.26105	6.24601	5.0985	5.27824
189	0.539665	1.85987	2.40028	2.21706	1.26021	2.8185	2.64366	3.12229	3.90366	3.23544	4.31884	4.14089	4.26496	4.26105	6.36601	5.45762	5.33849
190	0.539665	2.09983	2.2203	2.51625	1.86008	2.8185	2.46364	3.12229	3.90366	3.71556	4.3788	4.1411	4.20576	4.4411	6.36601	5.45762	5.51861
191	0.959497	2.57962	2.16031	2.51625	2.15997	2.39871	2.1031	3.54247	3.96403	3.71556	4.61862	3.96108	4.26496	4.4411	5.70514	4.97832	5.51861
192	1.37919	2.87929	1.92032	2.45665	2.21992	2.39871	2.1031	4.14278	4.14418	4.31349	5.15821	3.96108	4.56578	4.50106	5.34476	4.91836	5.21909
193	1.6791	2.87931	1.92032	2.0968	2.15997	2.69876	2.70368	4.14278	4.14442	3.65484	5.33767	3.78099	4.56578	5.10101	5.22499	4.67878	5.09888
194	1.6791	2.87931	1.92032	2.0968	2.09997	2.69876	3.18406	3.72291	4.14418	3.77518	5.33767	3.78099	4.56571	5.2209	4.8646	4.31902	5.03914
195	1.25916	2.39989	1.98033	2.51693	2.09997	2.81835	3.18406	3.30266	3.84331	3.77518	4.97838	3.84083	4.14513	5.2209	4.8646	4.31902	4.85917
196	1.25916	1.85997	2.40032	2.81573	1.98006	2.81835	3.18434	2.8825	3.30251	3.77564	4.79814	3.9609	3.78417	5.16108	5.40569	4.91868	4.85917
197	1.25916	1.62008	2.40032	2.81573	1.98006	3.23743	3.12388	2.8825	3.30251	3.89493	4.25795	3.9609	3.78417	4.62113	5.46563	5.39858	5.33855
198	1.19939	1.38002	2.16035	2.33601	2.33977	3.23743	3.12388	3.12231	3.54339	4.075	4.07826	4.08099	3.84503	4.62113	5.46563	5.51763	6.29743
199	1.19939	1.38002	1.56024	1.91656	2.34	2.69805	3.06392	3.54263	3.54339	3.89516	4.07826	4.08102	4.08529	4.80105	5.46563	5.51763	6.29743

## Sheet: S1_Panel_D
time	vEyeVel350_Mean	vEyeVel350_95ci_low	vEyeVel350_95ci_up	vEyeVel300_Mean	vEyeVel300_95ci_low	vEyeVel300_95ci_up	vEyeVel250_Mean	vEyeVel250_95ci_low	vEyeVel250_95ci_up	vEyeVel200_Mean	vEyeVel200_95ci_low	vEyeVel200_95ci_up
-100	7.04819	3.71072	10.3857	7.90537	4.75272	11.058	8.72595	5.78289	11.669	9.13322	6.26164	12.0048
-99	7.056	3.74999	10.362	8.13966	5.00601	11.2733	8.87641	5.96111	11.7917	9.29053	6.44211	12.139
-98	7.20894	3.94372	10.4742	8.42079	5.32883	11.5128	9.06612	6.17974	11.9525	9.453	6.62989	12.2761
-97	7.59472	4.38531	10.8041	8.82036	5.79747	11.8432	9.35746	6.51115	12.2038	9.68437	6.89924	12.4695
-96	8.06185	4.91627	11.2074	9.19081	6.25318	12.1285	9.62966	6.83163	12.4277	9.87553	7.1382	12.6129
-95	8.45039	5.36374	11.537	9.40012	6.5405	12.2598	9.74471	6.99136	12.4981	9.90603	7.21298	12.5991
-94	8.69822	5.65744	11.739	9.42037	6.61368	12.2271	9.68043	6.95736	12.4035	9.74856	7.08394	12.4132
-93	8.8009	5.77898	11.8228	9.28307	6.48696	12.0792	9.47098	6.75049	12.1915	9.44099	6.77538	12.1066
-92	8.67169	5.65433	11.689	8.93367	6.12517	11.7422	9.06257	6.33325	11.7919	8.94416	6.26442	11.6239
-91	8.36788	5.34673	11.389	8.48138	5.65389	11.3089	8.5443	5.80817	11.2804	8.33442	5.64166	11.0272
-90	7.91197	4.88163	10.9423	7.92643	5.08541	10.7675	7.90136	5.16937	10.6333	7.6108	4.91674	10.3049
-89	7.38065	4.32807	10.4332	7.34287	4.49041	10.1953	7.22665	4.50373	9.94957	6.87937	4.1932	9.56553
-88	6.87334	3.78196	9.96472	6.80996	3.94138	9.67855	6.59185	3.87131	9.3124	6.20503	3.5253	8.88477
-87	6.379	3.2512	9.5068	6.3062	3.4241	9.18829	5.99724	3.27492	8.71956	5.59758	2.92212	8.27303
-86	5.9149	2.76364	9.06616	5.82014	2.93033	8.70996	5.42086	2.69319	8.14853	5.04563	2.37058	7.72068
-85	5.60095	2.45813	8.74376	5.45978	2.58431	8.33525	4.98724	2.26712	7.70736	4.66053	1.99406	7.327
-84	5.37569	2.28404	8.46734	5.15905	2.33005	7.98805	4.6525	1.96624	7.33877	4.38662	1.74881	7.02443
-83	5.26975	2.25165	8.28786	4.97293	2.20603	7.73983	4.45999	1.825	7.09498	4.26908	1.67504	6.86313
-82	5.27335	2.31879	8.2279	4.93137	2.22104	7.6417	4.43236	1.8496	7.01512	4.32167	1.7728	6.87053
-81	5.36962	2.4423	8.29694	5.02657	2.34378	7.70936	4.5683	2.0165	7.12009	4.53586	2.01668	7.05503
-80	5.62373	2.67143	8.57603	5.32287	2.62505	8.0207	4.93628	2.37967	7.49288	4.97212	2.45188	7.49237
-79	5.9659	2.94211	8.98969	5.77575	3.02136	8.53015	5.47514	2.87636	8.07391	5.57418	3.01866	8.12969
-78	6.41424	3.29704	9.53144	6.38248	3.54918	9.21577	6.16687	3.5031	8.83064	6.3288	3.71474	8.94285
-77	6.88968	3.69318	10.0862	7.03423	4.12665	9.94181	6.88401	4.15499	9.61304	7.10911	4.43319	9.78503
-76	7.34835	4.11169	10.585	7.67038	4.71548	10.6253	7.58257	4.80657	10.3586	7.88022	5.1585	10.6019
-75	7.72599	4.50625	10.9457	8.17885	5.22309	11.1346	8.11903	5.33424	10.9038	8.49896	5.76682	11.2311
-74	7.87133	4.7095	11.0332	8.43695	5.51806	11.3558	8.3865	5.62601	11.147	8.86788	6.15666	11.5791
-73	7.8085	4.71519	10.9018	8.4286	5.56247	11.2947	8.38325	5.664	11.1025	8.96494	6.29098	11.6389
-72	7.51108	4.45716	10.565	8.12678	5.29881	10.9547	8.0666	5.38231	10.7509	8.72646	6.08378	11.3691
-71	6.91284	3.84536	9.98033	7.47138	4.64355	10.2992	7.39537	4.72002	10.0707	8.12777	5.49244	10.7631
-70	6.1193	2.98994	9.24867	6.58855	3.71887	9.45823	6.49571	3.79362	9.1978	7.2605	4.59999	9.92101
-69	5.2162	2.006	8.42641	5.57359	2.63992	8.50725	5.48011	2.72692	8.23329	6.22408	3.51792	8.93024
-68	4.31051	1.03619	7.58483	4.55585	1.56415	7.54755	4.46134	1.65495	7.26773	5.13771	2.38655	7.88888
-67	3.57789	0.276065	6.87971	3.7343	0.710138	6.75846	3.65233	0.810686	6.49398	4.2202	1.44218	6.99823
-66	3.04793	-0.234258	6.33012	3.13577	0.115679	6.15585	3.06668	0.220271	5.9131	3.50303	0.726885	6.27918
-65	2.89054	-0.337294	6.11838	2.91105	-0.0765896	5.89868	2.85972	0.0366446	5.68279	3.15096	0.402311	5.89961
-64	3.11203	-0.0494729	6.27353	3.10375	0.163563	6.04394	3.0485	0.264644	5.83235	3.18989	0.48223	5.89756
-63	3.67502	0.561406	6.78864	3.65248	0.749352	6.5556	3.58293	0.828719	6.33715	3.58973	0.91223	6.26723
-62	4.52011	1.4298	7.61041	4.53749	1.65699	7.41798	4.43572	1.69613	7.17531	4.32949	1.66606	6.99292
-61	5.46589	2.37342	8.55836	5.54518	2.67258	8.41779	5.40777	2.66801	8.14753	5.22108	2.55621	7.88595
-60	6.49631	3.38359	9.60903	6.63757	3.76238	9.51276	6.48971	3.74121	9.23822	6.25074	3.57468	8.9268
-59	7.45049	4.313	10.588	7.68315	4.80206	10.5642	7.53795	4.78411	10.2918	7.26587	4.57888	9.95286
-58	8.17775	5.0157	11.3398	8.50731	5.61936	11.3953	8.41314	5.66169	11.1646	8.12179	5.42888	10.8147
-57	8.61421	5.4361	11.7923	9.02559	6.13548	11.9157	9.03051	6.29296	11.7681	8.74182	6.05382	11.4298
-56	8.812	5.62169	12.0023	9.27415	6.37993	12.1684	9.41788	6.69189	12.1439	9.1475	6.46385	11.8312
-55	8.77164	5.58816	11.9551	9.25647	6.36774	12.1452	9.5688	6.85572	12.2819	9.31418	6.63968	11.9887
-54	8.53754	5.376	11.6991	9.00448	6.12383	11.8851	9.4983	6.79068	12.2059	9.27465	6.60739	11.9419
-53	8.15084	5.01869	11.283	8.58405	5.71128	11.4568	9.25527	6.54756	11.963	9.07773	6.4167	11.7388
-52	7.67656	4.56815	10.785	8.07622	5.20399	10.9484	8.87779	6.16562	11.59	8.76081	6.1026	11.419
-51	7.24732	4.15173	10.3429	7.57235	4.69958	10.4451	8.43011	5.72072	11.1395	8.36593	5.71573	11.0161
-50	6.8126	3.70755	9.91764	7.09793	4.21916	9.97671	7.92418	5.21904	10.6293	7.90515	5.26131	10.549
-49	6.45047	3.32042	9.58052	6.73372	3.8486	9.61885	7.44096	4.74047	10.1415	7.45352	4.81359	10.0935
-48	6.18961	3.03219	9.34704	6.49302	3.60567	9.38036	7.00469	4.30461	9.70478	7.02676	4.3848	9.66873
-47	5.98032	2.81747	9.14318	6.3445	3.46907	9.21993	6.6193	3.92058	9.31802	6.64321	3.99868	9.28773
-46	5.91482	2.77339	9.05625	6.34863	3.49751	9.19976	6.37358	3.6798	9.06735	6.36963	3.72449	9.01477
-45	5.96824	2.87604	9.06043	6.48215	3.66847	9.29582	6.30235	3.6252	8.97949	6.26363	3.6286	8.89865
-44	6.10644	3.06252	9.15036	6.67369	3.89322	9.45416	6.36452	3.70819	9.02084	6.28607	3.66541	8.90673
-43	6.42673	3.39623	9.45724	6.97516	4.20202	9.7483	6.58767	3.93954	9.2358	6.45339	3.8378	9.06899
-42	6.82194	3.76381	9.88008	7.30212	4.50446	10.0998	6.91711	4.25759	9.57662	6.73395	4.10863	9.35926
-41	7.28952	4.17221	10.4068	7.66766	4.81852	10.5168	7.35336	4.66133	10.0454	7.11843	4.46638	9.77047
-40	7.85825	4.678	11.0385	8.08325	5.17476	10.9917	7.88055	5.14777	10.6133	7.57475	4.88775	10.2617
-39	8.30299	5.07751	11.5285	8.33292	5.37561	11.2902	8.26987	5.50294	11.0368	7.8963	5.17927	10.6133
-38	8.67243	5.43252	11.9123	8.52876	5.54439	11.5131	8.59206	5.80759	11.3765	8.15337	5.41997	10.8868
-37	8.79408	5.55961	12.0285	8.49916	5.50477	11.4936	8.66523	5.87539	11.4551	8.18893	5.44994	10.9279
-36	8.67872	5.44797	11.9095	8.23957	5.23839	11.2408	8.48608	5.68867	11.2835	7.9973	5.25369	10.7409
-35	8.3386	5.11147	11.5657	7.80816	4.80693	10.8094	8.09975	5.29783	10.9017	7.63256	4.89092	10.3742
-34	7.75657	4.52465	10.9885	7.19181	4.18881	10.1948	7.5021	4.6935	10.3107	7.09254	4.35254	9.83253
-33	7.08363	3.85209	10.3152	6.54566	3.54909	9.54223	6.86561	4.06075	9.67047	6.55598	3.82547	9.28649
-32	6.32882	3.10906	9.54858	5.87937	2.90109	8.85765	6.21309	3.42642	8.99976	6.04583	3.33149	8.76018
-31	5.65151	2.45739	8.84564	5.32016	2.37218	8.26814	5.65591	2.90053	8.41128	5.64688	2.95275	8.341
-30	5.09515	1.94126	8.24904	4.91766	2.00982	7.82551	5.23725	2.51899	7.95551	5.3903	2.71676	8.06384
-29	4.6819	1.57865	7.78514	4.68043	1.81813	7.54273	4.96769	2.28357	7.65181	5.24892	2.59417	7.90367
-28	4.42895	1.3807	7.47721	4.57782	1.76386	7.39178	4.80744	2.15163	7.46324	5.17868	2.5445	7.81286
-27	4.37833	1.38084	7.37583	4.62141	1.85056	7.39226	4.76986	2.13519	7.40452	5.18762	2.57583	7.7994
-26	4.48579	1.51455	7.45702	4.78363	2.03228	7.53499	4.81504	2.187	7.44307	5.22053	2.62534	7.81572
-25	4.71111	1.73153	7.6907	4.97151	2.20934	7.73369	4.87665	2.24158	7.51172	5.2273	2.63896	7.81563
-24	4.99299	1.97015	8.01582	5.14255	2.34332	7.94178	4.9356	2.28168	7.58953	5.19176	2.59445	7.78907
-23	5.30118	2.22441	8.37794	5.28922	2.44548	8.13296	4.98872	2.31296	7.66447	5.13606	2.51946	7.75265
-22	5.61966	2.49974	8.73959	5.39396	2.51705	8.27087	5.03068	2.33872	7.72263	5.06763	2.42864	7.70662
-21	5.80933	2.67603	8.94262	5.39353	2.50952	8.27753	5.01812	2.32254	7.71369	4.95685	2.30356	7.61013
-20	5.95361	2.8321	9.07512	5.36294	2.49536	8.23052	5.03597	2.35052	7.72142	4.9106	2.25761	7.56359
-19	6.00851	2.90964	9.10737	5.28504	2.44274	8.12734	5.04655	2.37791	7.71519	4.8859	2.24551	7.52629
-18	5.94128	2.85445	9.02812	5.15481	2.32942	7.9802	5.03038	2.37389	7.68686	4.88088	2.25625	7.50552
-17	5.80715	2.71014	8.90416	5.01593	2.18567	7.84619	5.02076	2.36033	7.68119	4.89487	2.27605	7.51369
-16	5.6269	2.50445	8.74934	4.86591	2.01594	7.71589	5.00723	2.32929	7.68518	4.92375	2.30014	7.54737
-15	5.43395	2.29572	8.57218	4.74319	1.87936	7.60703	4.98775	2.29326	7.68224	4.94942	2.31876	7.58007
-14	5.23176	2.1004	8.36313	4.63549	1.77617	7.49481	4.90664	2.20655	7.60673	4.92301	2.28984	7.55619
-13	5.05119	1.95559	8.14679	4.56129	1.73095	7.39164	4.81139	2.1237	7.49908	4.88025	2.25643	7.50407
-12	5.00391	1.95991	8.04791	4.63628	1.846	7.42655	4.82326	2.15831	7.48822	4.94631	2.33782	7.55481
-11	5.07667	2.07323	8.08011	4.86295	2.10329	7.62262	4.94211	2.29605	7.58817	5.11434	2.51733	7.71135
-10	5.17571	2.1892	8.16222	5.12781	2.37798	7.87764	5.08323	2.44468	7.72178	5.31226	2.71905	7.90546
-9	5.32181	2.33733	8.30629	5.50117	2.74871	8.25363	5.32171	2.68594	7.95748	5.61857	3.02862	8.20852
-8	5.58015	2.59819	8.56212	6.01617	3.26468	8.76765	5.70799	3.08136	8.33462	6.06842	3.49123	8.64561
-7	5.84941	2.87511	8.82371	6.56227	3.81873	9.30581	6.17179	3.56399	8.7796	6.58553	4.03122	9.13984
-6	6.1666	3.19855	9.13464	7.12937	4.3924	9.86634	6.68615	4.09285	9.27945	7.12155	4.58476	9.65833
-5	6.44424	3.47393	9.41454	7.60103	4.85866	10.3434	7.13729	4.54227	9.73231	7.56496	5.02651	10.1034
-4	6.70057	3.70816	9.69298	7.94605	5.17699	10.7151	7.49625	4.87355	10.119	7.89388	5.3259	10.4619
-3	6.86238	3.8377	9.88706	8.08354	5.27746	10.8896	7.69228	5.02797	10.3566	8.02638	5.41473	10.638
-2	6.93225	3.87907	9.98542	7.99997	5.1624	10.8375	7.68634	4.98628	10.3864	7.93203	5.28417	10.5799
-1	6.88426	3.81813	9.9504	7.65057	4.80372	10.4974	7.42878	4.7188	10.1388	7.58483	4.9285	10.2412
0	6.73078	3.66401	9.79755	7.1286	4.28967	9.96753	7.01015	4.31348	9.70683	7.06611	4.42549	9.70672
1	6.45722	3.38973	9.52471	6.4544	3.62606	9.28273	6.43998	3.76277	9.11719	6.41209	3.7919	9.03228
2	6.13365	3.06443	9.20287	5.74925	2.92541	8.57309	5.84255	3.17567	8.50943	5.76148	3.15075	8.3722
3	5.76166	2.6836	8.83972	5.10701	2.26954	7.94447	5.29083	2.61124	7.97042	5.17608	2.55042	7.80175
4	5.37598	2.28729	8.46466	4.59136	1.7315	7.45123	4.85768	2.14883	7.56653	4.7379	2.08106	7.39473
5	5.099	2.00942	8.18857	4.3454	1.47155	7.21925	4.65259	1.91854	7.38663	4.52594	1.84345	7.20844
6	4.90795	1.82088	7.99501	4.32922	1.45248	7.20597	4.63272	1.88668	7.37875	4.51317	1.82062	7.20571
7	4.81788	1.7328	7.90295	4.53085	1.66329	7.39842	4.76909	2.0271	7.51107	4.66788	1.98179	7.35396
8	4.86291	1.76814	7.95767	4.92334	2.06607	7.78061	5.0499	2.31922	7.78058	4.96765	2.29481	7.64049
9	5.02649	1.91256	8.14043	5.41706	2.56346	8.27066	5.40679	2.68566	8.12792	5.35282	2.68958	8.01606
10	5.23487	2.09266	8.37707	5.89067	3.02821	8.75313	5.70466	2.98199	8.42733	5.69195	3.0255	8.3584
11	5.38538	2.2134	8.55736	6.2134	3.33252	9.09429	5.85135	3.11736	8.58533	5.90279	3.22288	8.5827
12	5.47559	2.28283	8.66834	6.36137	3.46262	9.26012	5.86396	3.11847	8.60946	5.99337	3.30069	8.68604
13	5.44463	2.25196	8.6373	6.25751	3.3552	9.15982	5.68033	2.93663	8.42402	5.90655	3.21601	8.59709
14	5.42011	2.2431	8.59712	6.03954	3.14884	8.93024	5.44129	2.71335	8.16923	5.75716	3.08467	8.42965
15	5.26789	2.11159	8.4242	5.67077	2.79834	8.5432	5.07854	2.37012	7.78696	5.48379	2.83425	8.13333
16	5.09182	1.95289	8.23074	5.26734	2.41226	8.12241	4.7152	2.02135	7.40906	5.1916	2.55969	7.82351
17	4.84639	1.72346	7.96933	4.81955	1.97965	7.65944	4.36202	1.67796	7.04609	4.88909	2.26782	7.51036
18	4.58009	1.46585	7.69433	4.42973	1.59464	7.26483	4.06455	1.37966	6.74944	4.61563	1.99275	7.2385
19	4.3492	1.24169	7.45671	4.13824	1.30099	6.9755	3.83716	1.14879	6.52553	4.38923	1.75973	7.01873
20	4.14253	1.04008	7.24498	3.96467	1.12067	6.80867	3.69449	1.00603	6.38294	4.22822	1.59486	6.86157
21	4.06273	0.95208	7.17339	3.9787	1.11619	6.84121	3.69669	1.00303	6.39035	4.18815	1.54735	6.82896
22	4.07105	0.944594	7.19751	4.11494	1.23084	6.99903	3.8115	1.11026	6.51274	4.25974	1.6113	6.90818
23	4.1804	1.04741	7.31339	4.32929	1.43406	7.22452	4.0052	1.30157	6.70883	4.39712	1.74883	7.04542
24	4.36039	1.23714	7.48364	4.58619	1.6981	7.47428	4.25499	1.5578	6.95217	4.58897	1.95096	7.22698
25	4.70426	1.60058	7.80795	4.95107	2.0838	7.81834	4.63765	1.95368	7.32162	4.9264	2.30555	7.54726
26	5.11827	2.03873	8.19781	5.32769	2.48758	8.1678	5.06898	2.401	7.73696	5.29777	2.69531	7.90022
27	5.60312	2.53337	8.67287	5.72445	2.89871	8.55019	5.55899	2.89853	8.21945	5.70643	3.1116	8.30127
28	6.18818	3.10138	9.27499	6.19153	3.35475	9.0283	6.13298	3.46025	8.80572	6.19523	3.58655	8.80392
29	6.7615	3.64473	9.87828	6.63851	3.77628	9.50074	6.70393	4.00965	9.39822	6.65906	4.02596	9.29217
30	7.249	4.1157	10.3823	6.98913	4.11223	9.86604	7.1898	4.48454	9.89506	7.03347	4.38551	9.68144
31	7.63585	4.5067	10.765	7.28769	4.41639	10.159	7.6127	4.91325	10.3121	7.33785	4.69099	9.9847
32	7.84807	4.73474	10.9614	7.45375	4.60466	10.3028	7.88659	5.20862	10.5646	7.49088	4.86045	10.1213
33	7.83999	4.73641	10.9436	7.45463	4.6231	10.2862	7.97956	5.32002	10.6391	7.47917	4.86334	10.095
34	7.62473	4.5036	10.7459	7.28718	4.44714	10.1272	7.86575	5.20146	10.53	7.27782	4.65651	9.89914
35	7.21966	4.06183	10.3775	6.94571	4.07519	9.81622	7.53699	4.8485	10.2255	6.90176	4.25884	9.54469
36	6.68717	3.48569	9.88866	6.48306	3.56854	9.39759	7.02979	4.30377	9.75581	6.40016	3.72607	9.07424
37	6.17347	2.95264	9.39431	6.02835	3.09017	8.96652	6.48633	3.74024	9.23243	5.90916	3.22221	8.59612
38	5.7778	2.57792	8.97769	5.67917	2.75861	8.59974	6.01485	3.28268	8.74702	5.52736	2.85969	8.19503
39	5.50611	2.35553	8.65669	5.46525	2.59543	8.33508	5.62024	2.9295	8.31097	5.25834	2.63455	7.88212
40	5.49117	2.40687	8.57547	5.52983	2.7264	8.33326	5.47991	2.84435	8.11546	5.25786	2.68764	7.82809
41	5.77348	2.75188	8.79508	5.89011	3.13771	8.64251	5.64627	3.05417	8.23838	5.55761	3.02597	8.08924
42	6.28142	3.2996	9.26324	6.48234	3.74233	9.22235	6.0739	3.49326	8.65454	6.094	3.56854	8.61945
43	7.00357	4.03067	9.97647	7.27089	4.50141	10.0404	6.77176	4.16687	9.37666	6.8676	4.31469	9.42052
44	7.69276	4.69943	10.6861	8.05563	5.23322	10.878	7.53498	4.88418	10.1858	7.66697	5.06942	10.2645
45	8.31843	5.28607	11.3508	8.75737	5.88735	11.6274	8.28925	5.5964	10.9821	8.43063	5.79477	11.0665
46	8.71053	5.63176	11.7893	9.18451	6.28548	12.0835	8.86023	6.13936	11.5811	8.98099	6.32156	11.6404
47	8.82871	5.72481	11.9326	9.29992	6.40788	12.192	9.17324	6.45537	11.8911	9.26364	6.60978	11.9175
48	8.76969	5.67209	11.8673	9.18211	6.32683	12.0374	9.26304	6.5734	11.9527	9.32557	6.69887	11.9523
49	8.61002	5.53162	11.6884	8.92526	6.10817	11.7423	9.19241	6.53247	11.8523	9.23418	6.6338	11.8346
50	8.4742	5.40155	11.5469	8.67125	5.86647	11.476	9.06157	6.40815	11.715	9.09744	6.50139	11.6935
51	8.44273	5.34488	11.5406	8.50504	5.675	11.3351	8.95103	6.2727	11.6294	9.01001	6.39096	11.6291
52	8.70459	5.55592	11.8533	8.62308	5.7439	11.5023	9.04197	6.31907	11.7649	9.14292	6.48367	11.8022
53	9.30463	6.1157	12.4936	9.10866	6.19239	12.0249	9.44262	6.68873	12.1965	9.58968	6.90162	12.2777
54	10.2548	7.05832	13.4513	9.97263	7.05284	12.8924	10.1943	7.44138	12.9473	10.3887	7.69815	13.0792
55	11.4717	8.30796	14.6355	11.1398	8.25574	14.0239	11.2499	8.53275	13.9671	11.4762	8.81218	14.1401
56	12.7186	9.60642	15.8307	12.3622	9.53044	15.1939	12.4091	9.74108	15.077	12.6463	10.0207	15.2719
57	13.9611	10.8792	17.043	13.6394	10.8399	16.4389	13.6693	11.0308	16.3078	13.8911	11.2884	16.4938
58	14.9301	11.8354	18.0248	14.6875	11.8777	17.4973	14.7799	12.1337	17.4261	14.9632	12.3561	17.5704
59	15.6868	12.5414	18.8322	15.5044	12.6448	18.364	15.7095	13.0223	18.3966	15.8457	13.2102	18.4812
60	16.2077	13.0065	19.4089	16.113	13.1926	19.0334	16.4643	13.7269	19.2017	16.5345	13.8639	19.2052
61	16.5593	13.3359	19.7827	16.5767	13.6232	19.5301	17.074	14.3084	19.8396	17.0716	14.384	19.7592
62	16.9297	13.7249	20.1345	17.0508	14.1046	19.9969	17.6375	14.8719	20.403	17.5716	14.8886	20.2546
63	17.3643	14.2115	20.5171	17.5716	14.6744	20.4689	18.1984	15.4623	20.9345	18.0865	15.43	20.7431
64	18.0458	14.9544	21.1372	18.3084	15.4783	21.1385	18.8921	16.197	21.5872	18.759	16.1361	21.382
65	18.8944	15.8434	21.9454	19.1745	16.3943	21.9548	19.6671	17.0012	22.3329	19.5356	16.9354	22.1358
66	19.9509	16.9009	23.0009	20.1918	17.4185	22.965	20.564	17.9008	23.2272	20.4532	17.8531	23.0534
67	21.1439	18.0648	24.223	21.2835	18.478	24.0891	21.554	18.8699	24.2382	21.4633	18.8438	24.0828
68	22.2623	19.1362	25.3884	22.2828	19.4204	25.1451	22.4831	19.7651	25.2011	22.413	19.7641	25.0618
69	23.2871	20.1131	26.461	23.2124	20.2931	26.1317	23.4121	20.6588	26.1653	23.34	20.6608	26.0192
70	24.0846	20.869	27.3002	23.9247	20.964	26.8853	24.1983	21.4153	26.9813	24.1063	21.3996	26.8131
71	24.598	21.3637	27.8322	24.394	21.4195	27.3684	24.7919	21.9922	27.5915	24.6551	21.9283	27.3819
72	24.9377	21.7059	28.1695	24.7488	21.7822	27.7154	25.305	22.4995	28.1104	25.11	22.3689	27.8511
73	25.1632	21.9637	28.3626	25.0813	22.144	28.0186	25.7668	22.9749	28.5587	25.5099	22.769	28.2507
74	25.3126	22.1607	28.4645	25.3838	22.4815	28.2861	26.1373	23.3706	28.9039	25.8281	23.0974	28.5587
75	25.5935	22.4922	28.6948	25.8367	22.965	28.7083	26.58	23.8429	29.3171	26.2323	23.5187	28.9459
76	25.9866	22.9203	29.0529	26.3841	23.5282	29.2399	27.044	24.3318	29.7563	26.6931	23.997	29.3891
77	26.5953	23.5345	29.6562	27.0976	24.2371	29.9581	27.6251	24.918	30.3322	27.2928	24.6017	29.9839
78	27.3814	24.3066	30.4563	27.8917	25.0203	30.763	28.2753	25.559	30.9915	27.9937	25.2986	30.6888
79	28.3099	25.2261	31.3938	28.7277	25.8577	31.5977	28.9733	26.2481	31.6985	28.7395	26.0433	31.4356
80	29.2744	26.2047	32.3441	29.5332	26.6874	32.379	29.7138	26.9924	32.4351	29.5259	26.842	32.2099
81	30.2054	27.193	33.2178	30.2695	27.4828	33.0563	30.4344	27.7482	33.1206	30.2903	27.6489	32.9317
82	31.0339	28.1036	33.9642	30.891	28.1767	33.6054	31.1127	28.4814	33.744	30.9936	28.4134	33.5739
83	31.5926	28.7478	34.4375	31.299	28.6488	33.9492	31.6163	29.0477	34.1848	31.4994	28.986	34.0128
84	31.8979	29.0936	34.7022	31.5217	28.889	34.1545	31.9469	29.412	34.4817	31.8322	29.3555	34.3089
85	31.8142	28.9804	34.648	31.4748	28.8044	34.1453	31.975	29.4309	34.5191	31.8679	29.3831	34.3527
86	31.4402	28.5213	34.3591	31.246	28.5048	33.9873	31.7445	29.1584	34.3306	31.659	29.1319	34.186
87	30.6964	27.6778	33.715	30.7131	27.9044	33.5217	31.1614	28.5259	33.7968	31.1124	28.5351	33.6896
88	29.8321	26.7308	32.9335	30.0562	27.2028	32.9096	30.4024	27.7257	33.0792	30.4155	27.7972	33.0339
89	28.8618	25.7136	32.0099	29.25	26.3807	32.1193	29.4924	26.7918	32.1931	29.5792	26.9394	32.219
90	27.8686	24.7108	31.0264	28.3759	25.506	31.2459	28.5341	25.8225	31.2456	28.6857	26.0388	31.3326
91	27.0346	23.8841	30.1851	27.5564	24.6845	30.4282	27.6704	24.9529	30.3879	27.8744	25.2255	30.5233
92	26.3819	23.2328	29.531	26.8259	23.9409	29.7109	26.9643	24.2388	29.6897	27.1941	24.5395	29.8486
93	26.0769	22.9147	29.2391	26.3915	23.4886	29.2944	26.5863	23.8557	29.3168	26.8048	24.1444	29.4652
94	25.9478	22.7686	29.1271	26.1218	23.2157	29.0279	26.4288	23.7053	29.1523	26.597	23.9392	29.2548
95	26.0439	22.8514	29.2363	26.0981	23.21	28.9862	26.511	23.8058	29.2161	26.5923	23.9469	29.2377
96	26.2761	23.0839	29.4683	26.3052	23.451	29.1594	26.792	24.1096	29.4744	26.7712	24.1426	29.3998
97	26.5363	23.3646	29.708	26.6595	23.8465	29.4724	27.1557	24.4971	29.8143	27.0312	24.4225	29.6398
98	26.7615	23.6182	29.9048	27.1138	24.3279	29.8997	27.5146	24.8685	30.1606	27.2907	24.6927	29.8887
99	26.8462	23.7335	29.9589	27.4944	24.7185	30.2703	27.7186	25.0757	30.3616	27.4479	24.8531	30.0427
100	26.7592	23.6688	29.8497	27.7302	24.9497	30.5107	27.7082	25.0605	30.356	27.4416	24.8442	30.0389
101	26.6601	23.5795	29.7406	27.8885	25.0978	30.6792	27.5787	24.9217	30.2357	27.3554	24.7519	29.9588
102	26.5143	23.4297	29.5989	27.8949	25.0972	30.6926	27.2915	24.6238	29.9593	27.1636	24.5527	29.7745
103	26.3072	23.2031	29.4114	27.6651	24.8601	30.4701	26.7945	24.1119	29.4771	26.7959	24.1732	29.4187
104	26.1388	23.0065	29.2711	27.316	24.4992	30.1327	26.2599	23.5611	28.9588	26.3992	23.7615	29.0369
105	25.9585	22.7947	29.1223	26.791	23.9509	29.631	25.6451	22.9255	28.3647	25.9176	23.2589	28.5764
106	25.7702	22.5803	28.9602	26.1727	23.3006	29.0448	25.0371	22.2974	27.7768	25.4092	22.7292	28.0892
107	25.5072	22.3101	28.7042	25.4508	22.5513	28.3503	24.4274	21.6759	27.179	24.8686	22.175	27.5622
108	25.187	22.0023	28.3717	24.7515	21.8359	27.6671	23.9189	21.1649	26.6729	24.3731	21.6764	27.0698
109	24.7251	21.5708	27.8794	24.0593	21.1496	26.9689	23.5092	20.7687	26.2496	23.9278	21.2445	26.611
110	24.0934	20.9811	27.2056	23.3855	20.5022	26.2689	23.1486	20.4342	25.8629	23.5058	20.8497	26.1618
111	23.3585	20.2839	26.4331	22.794	19.9457	25.6422	22.8979	20.2143	25.5815	23.1679	20.5444	25.7914
112	22.5339	19.4905	25.5773	22.2892	19.4783	25.1002	22.7133	20.0614	25.3652	22.8858	20.2957	25.4759
113	21.763	18.7389	24.7871	21.9537	19.1654	24.7419	22.6375	20.0035	25.2714	22.7173	20.1461	25.2885
114	21.1132	18.0887	24.1376	21.773	18.9819	24.5641	22.6338	19.9957	25.2719	22.6313	20.0562	25.2064
115	20.789	17.7497	23.8284	21.8581	19.043	24.6731	22.7835	20.1221	25.4449	22.723	20.1239	25.3221
116	20.7757	17.7012	23.8501	22.0716	19.2179	24.9252	22.9654	20.2691	25.6616	22.8588	20.2233	25.4943
117	21.1401	18.023	24.2572	22.4579	19.5674	25.3483	23.2287	20.5024	25.9551	23.1016	20.4339	25.7692
118	21.8087	18.6463	24.9711	22.8921	19.9761	25.8082	23.4806	20.7392	26.222	23.3488	20.663	26.0347
119	22.6208	19.4293	25.8123	23.278	20.3592	26.1968	23.6433	20.9098	26.3768	23.5251	20.8417	26.2085
120	23.5002	20.2962	26.7041	23.5757	20.6665	26.4849	23.7214	21.0053	26.4374	23.6291	20.9586	26.2996
121	24.2366	21.0402	27.433	23.6741	20.7794	26.5689	23.6362	20.9353	26.3372	23.5773	20.9187	26.2359
122	24.6673	21.4978	27.8368	23.5312	20.6523	26.41	23.3557	20.6619	26.0496	23.3274	20.6755	25.9794
123	24.6982	21.5618	27.8345	23.1253	20.2548	25.9958	22.9005	20.1993	25.6016	22.9024	20.2474	25.5573
124	24.2734	21.1602	27.3865	22.4657	19.5912	25.3402	22.2721	19.5551	24.9891	22.2842	19.6212	24.9473
125	23.43	20.3191	26.5408	21.665	18.7745	24.5556	21.5678	18.833	24.3027	21.5846	18.9127	24.2564
126	22.2697	19.143	25.3964	20.8073	17.8968	23.7178	20.8718	18.1263	23.6173	20.8773	18.2024	23.5521
127	20.9294	17.7843	24.0746	19.936	17.0135	22.8585	20.173	17.4298	22.9161	20.1486	17.4795	22.8177
128	19.6173	16.462	22.7726	19.2121	16.2927	22.1315	19.6129	16.8847	22.3411	19.5675	16.912	22.223
129	18.4839	15.3364	21.6315	18.6974	15.7967	21.5982	19.2357	16.5295	21.9419	19.1784	16.5404	21.8163
130	17.7079	14.5859	20.8299	18.4457	15.5753	21.3162	19.0919	16.4116	21.7722	19.0191	16.4018	21.6363
131	17.2985	14.2156	20.3814	18.4063	15.5702	21.2424	19.1048	16.4504	21.7593	19.0343	16.4389	21.6297
132	17.2765	14.2325	20.3205	18.5552	15.7462	21.3643	19.2401	16.6047	21.8755	19.1854	16.6074	21.7635
133	17.5697	14.5607	20.5787	18.8342	16.0448	21.6235	19.4521	16.8312	22.073	19.4092	16.8442	21.9741
134	18.1095	15.1148	21.1043	19.1653	16.3797	21.951	19.6622	17.0422	22.2823	19.6217	17.0559	22.1874
135	18.7268	15.7207	21.7328	19.4178	16.6238	22.2117	19.783	17.1526	22.4134	19.7248	17.1454	22.3042
136	19.2289	16.1966	22.2611	19.4701	16.6581	22.2821	19.7063	17.0573	22.3552	19.6109	17.0088	22.213
137	19.5942	16.5292	22.6592	19.3853	16.5483	22.2222	19.511	16.8391	22.1829	19.3604	16.7318	21.989
138	19.6032	16.5142	22.6921	18.9785	16.1175	21.8396	19.0608	16.3701	21.7516	18.8433	16.1949	21.4917
139	19.292	16.1946	22.3893	18.3394	15.4622	21.2166	18.4238	15.7233	21.1242	18.1454	15.4891	20.8018
140	18.7003	15.6093	21.7914	17.5519	14.6736	20.4303	17.6926	14.9931	20.3921	17.3585	14.7064	20.0107
141	17.9311	14.8533	21.009	16.7163	13.8553	19.5774	16.9584	14.2704	19.6464	16.5996	13.9622	19.2369
142	17.1232	14.0591	20.1874	15.9649	13.134	18.7958	16.3218	13.6501	18.9935	15.9631	13.3433	18.5829
143	16.3629	13.3043	19.4215	15.3403	12.5358	18.1449	15.7923	13.1302	18.4544	15.4537	12.8431	18.0644
144	15.7124	12.6497	18.7751	14.8935	12.0918	17.6952	15.4033	12.7333	18.0733	15.106	12.4873	17.7247
145	15.2441	12.1673	18.321	14.641	11.8126	17.4695	15.1453	12.4506	17.84	14.8922	12.2513	17.5332
146	14.8762	11.7779	17.9745	14.4647	11.5846	17.3447	14.8938	12.1629	17.6247	14.6945	12.0218	17.3671
147	14.5583	11.4409	17.6756	14.2749	11.3426	17.2073	14.5669	11.806	17.3278	14.4181	11.7195	17.1166
148	14.1774	11.052	17.3027	13.9525	10.9905	16.9145	14.0585	11.287	16.83	13.9536	11.2466	16.6606
149	13.661	10.5421	16.7799	13.4045	10.4499	16.3591	13.3197	10.5646	16.0748	13.2523	10.5607	15.944
150	12.9431	9.82869	16.0575	12.555	9.62962	15.4804	12.3	9.57188	15.0282	12.2639	9.59726	14.9305
151	11.9368	8.81096	15.0626	11.3354	8.43614	14.2346	10.9687	8.25736	13.68	10.9708	8.32097	13.6206
152	10.7354	7.57761	13.8932	9.8694	6.97379	12.765	9.48368	6.76648	12.2009	9.52398	6.87123	12.1767
153	9.36758	6.16557	12.5696	8.22544	5.30729	11.1436	7.91292	5.16838	10.6575	8.00571	5.32971	10.6817
154	7.99897	4.76024	11.2377	6.63147	3.68153	9.58142	6.4558	3.67953	9.23207	6.61841	3.91107	9.32574
155	6.7035	3.46619	9.9408	5.23627	2.2777	8.19484	5.22552	2.44044	8.0106	5.47267	2.75053	8.1948
156	5.53784	2.3296	8.74609	4.08527	1.14	7.03053	4.25573	1.48108	7.03038	4.59697	1.87403	7.3199
157	4.60711	1.43676	7.77745	3.34236	0.421341	6.26338	3.66468	0.910773	6.41858	4.09663	1.38188	6.81138
158	3.84971	0.709973	6.98944	2.9393	0.0411686	5.83742	3.36026	0.627315	6.0932	3.87539	1.17421	6.57657
159	3.21787	0.084547	6.3512	2.76159	-0.131561	5.65473	3.24106	0.515794	5.96632	3.80455	1.11229	6.4968
160	2.6973	-0.453972	5.84857	2.7265	-0.180901	5.6339	3.21444	0.482956	5.94592	3.7933	1.10313	6.48348
161	2.17397	-0.996752	5.34469	2.67456	-0.249367	5.59848	3.13966	0.401447	5.87787	3.6884	1.00101	6.37579
162	1.62461	-1.54808	4.79731	2.48747	-0.437289	5.41223	2.91929	0.185868	5.65272	3.38982	0.712857	6.06679
163	1.10374	-2.04515	4.25262	2.14768	-0.754835	5.0502	2.54148	-0.171989	5.25494	2.88478	0.228327	5.54124
164	0.660172	-2.44732	3.76766	1.66088	-1.20128	4.52305	2.05471	-0.62743	4.73684	2.24163	-0.386158	4.86942
165	0.264215	-2.79802	3.32645	1.00761	-1.80866	3.82387	1.44365	-1.20852	4.09582	1.46994	-1.12917	4.06905
166	0.0561531	-2.98637	3.09868	0.381282	-2.41024	3.17281	0.900432	-1.7436	3.54446	0.78813	-1.80039	3.37665
167	0.0344142	-3.01944	3.08827	-0.172485	-2.96624	2.62127	0.452986	-2.20663	3.1126	0.25482	-2.34368	2.85332
168	0.252116	-2.84719	3.35142	-0.496305	-3.322	2.32939	0.228176	-2.46873	2.92509	-0.00190899	-2.63286	2.62904
169	0.65116	-2.51104	3.81336	-0.550866	-3.42917	2.32743	0.263002	-2.48294	3.00894	0.0579429	-2.61981	2.7357
170	1.18774	-2.03727	4.41274	-0.294015	-3.23039	2.64236	0.589546	-2.20204	3.38113	0.467159	-2.25748	3.1918
171	1.74496	-1.52468	5.01459	0.163746	-2.81751	3.145	1.0931	-1.72632	3.91252	1.09483	-1.66035	3.85001
172	2.22723	-1.05645	5.51091	0.76489	-2.235	3.76478	1.68267	-1.1401	4.50543	1.83027	-0.930882	4.59142
173	2.44634	-0.821398	5.71407	1.27478	-1.71542	4.26499	2.13294	-0.67235	4.93823	2.43206	-0.31488	5.179
174	2.4132	-0.821416	5.64781	1.64292	-1.31729	4.60313	2.39374	-0.383174	5.17065	2.82097	0.0991701	5.54277
175	2.14378	-1.05444	5.342	1.78561	-1.14052	4.71175	2.38441	-0.369263	5.13808	2.91402	0.210071	5.61797
176	1.66014	-1.50411	4.82438	1.67476	-1.22406	4.57358	2.08414	-0.65808	4.82636	2.68141	-0.0167124	5.37954
177	1.0002	-2.13396	4.13436	1.30089	-1.58092	4.1827	1.50682	-1.23117	4.2448	2.12717	-0.570974	4.82531
178	0.277887	-2.8348	3.39057	0.781823	-2.09511	3.65875	0.777751	-1.95945	3.51495	1.37599	-1.32239	4.07436
179	-0.398571	-3.49432	2.69718	0.171094	-2.70279	3.04497	-0.0276471	-2.75736	2.70206	0.511749	-2.17576	3.19926
180	-0.960752	-4.05666	2.13516	-0.398653	-3.27473	2.47743	-0.74497	-3.46577	1.97583	-0.296088	-2.969	2.37683
181	-1.27171	-4.39444	1.85102	-0.748257	-3.63589	2.13937	-1.1793	-3.89899	1.54038	-0.858171	-3.52476	1.80842
182	-1.33511	-4.49633	1.8261	-0.884123	-3.78725	2.019	-1.36082	-4.08739	1.36574	-1.18203	-3.85372	1.48966
183	-1.17025	-4.37268	2.03218	-0.797453	-3.71977	2.12486	-1.25299	-3.99732	1.49134	-1.22709	-3.91665	1.46246
184	-0.781452	-4.01038	2.44747	-0.445569	-3.38526	2.49412	-0.866279	-3.63121	1.89865	-0.993835	-3.70486	1.71719
185	-0.308861	-3.53087	2.91315	0.0223895	-2.91963	2.96441	-0.323609	-3.09653	2.44932	-0.588087	-3.30731	2.13113
186	0.157147	-3.02709	3.34139	0.511263	-2.41733	3.43986	0.266765	-2.49574	3.02927	-0.105573	-2.81214	2.60099
187	0.477873	-2.64925	3.60499	0.87753	-2.02373	3.77879	0.73298	-2.00125	3.46721	0.306312	-2.37024	2.98287
188	0.637058	-2.44368	3.7178	1.1006	-1.77698	3.97818	1.04171	-1.66213	3.74555	0.606071	-2.04102	3.25316
189	0.666628	-2.39526	3.72852	1.18679	-1.677	4.05057	1.21123	-1.46974	3.8922	0.816542	-1.8118	3.44488
190	0.574299	-2.50451	3.6531	1.14766	-1.71956	4.01488	1.24704	-1.42953	3.92362	0.937665	-1.69279	3.56812
191	0.408045	-2.71301	3.5291	1.00541	-1.8773	3.88811	1.17604	-1.51243	3.8645	0.981012	-1.668	3.63002
192	0.155966	-3.0124	3.32433	0.756471	-2.14414	3.65708	0.993262	-1.71351	3.70004	0.921754	-1.75039	3.5939
193	-0.0305626	-3.23204	3.17091	0.545239	-2.36541	3.45589	0.838749	-1.88078	3.55828	0.893812	-1.79306	3.58068
194	-0.14555	-3.35898	3.06788	0.359711	-2.55421	3.27363	0.688838	-2.03709	3.41477	0.866658	-1.8251	3.55841
195	-0.124348	-3.32394	3.07525	0.270765	-2.63442	3.17595	0.621773	-2.09934	3.34288	0.910487	-1.77254	3.59351
196	0.029616	-3.14185	3.20108	0.283611	-2.61155	3.17877	0.612883	-2.10302	3.32879	1.00251	-1.66965	3.67467
197	0.254126	-2.89409	3.40234	0.342266	-2.55055	3.23508	0.606341	-2.1113	3.32398	1.06748	-1.6002	3.73516
198	0.487969	-2.64711	3.62305	0.405671	-2.49261	3.30395	0.575636	-2.15179	3.30306	1.09886	-1.57481	3.77252
199	0.710937	-2.42699	3.84886	0.487052	-2.42448	3.39859	0.551784	-2.19176	3.29533	1.10851	-1.58029	3.7973
200	0.814113	-2.34234	3.97057	0.473401	-2.45734	3.40414	0.440173	-2.32231	3.20266	1.00905	-1.70045	3.71855
201	0.815958	-2.36134	3.99325	0.444459	-2.50116	3.39008	0.335969	-2.44088	3.11281
202	0.686438	-2.51	3.88287	0.349179	-2.6009	3.29926	0.20477	-2.57474	2.98428
203	0.412346	-2.79189	3.61658	0.190978	-2.75163	3.13359	0.0578236	-2.71126	2.82691
204	-0.00036628	-3.20646	3.20573	-0.00623508	-2.93668	2.92421	-0.0862069	-2.84074	2.66832
205	-0.468947	-3.66836	2.73046	-0.204711	-3.11929	2.70987	-0.206924	-2.94478	2.53093
206	-1.04476	-4.22629	2.13676	-0.486757	-3.37933	2.40581	-0.357524	-3.07555	2.3605
207	-1.65919	-4.8196	1.50122	-0.777292	-3.65092	2.09634	-0.495549	-3.20102	2.20992
208	-2.3008	-5.43766	0.836058	-1.14179	-4.00064	1.71706	-0.70604	-3.40295	1.99087
209	-2.96163	-6.07779	0.154521	-1.58352	-4.4359	1.26886	-0.991717	-3.68432	1.70088
210	-3.50308	-6.60705	-0.399117	-1.98357	-4.83789	0.870761	-1.25411	-3.94479	1.43657
211	-3.87159	-6.96641	-0.776771	-2.33318	-5.19029	0.523931	-1.54265	-4.22614	1.14083
212	-4.11378	-7.19278	-1.03478	-2.68069	-5.52891	0.167532	-1.87262	-4.53787	0.792636
213	-4.13372	-7.18014	-1.08731	-2.9056	-5.72839	-0.0828058	-2.14833	-4.7861	0.489448
214	-3.98498	-6.99627	-0.973685	-3.01221	-5.81259	-0.211833	-2.35874	-4.98237	0.264897
215	-3.63939	-6.62081	-0.657969	-2.98028	-5.76754	-0.19302	-2.46411	-5.09079	0.162567
216	-3.12811	-6.1121	-0.144135	-2.80219	-5.60847	0.00408707	-2.46653	-5.12631	0.193258
217	-2.48504	-5.51579	0.545708	-2.48021	-5.33979	0.37938	-2.33924	-5.0575	0.379016
218	-1.79285	-4.90587	1.32016	-2.06147	-4.99054	0.867608	-2.07888	-4.86167	0.703905
219	-1.0793	-4.27773	2.11912	-1.56643	-4.55324	1.42039	-1.7097	-4.5389	1.11949
220	-0.400182	-3.66518	2.86482	-1.03508	-4.05458	1.98443	-1.26813	-4.12006	1.5838
221	0.0614472	-3.23496	3.35786	-0.609219	-3.63324	2.4148	-0.872119	-3.7235	1.97926
222	0.300365	-2.98139	3.58212	-0.314934	-3.31253	2.68266	-0.572454	-3.39796	2.25305
223	0.353192	-2.88395	3.59034	-0.107033	-3.061	2.84694	-0.334506	-3.11917	2.45015
224	0.22133	-2.97004	3.4127	-0.0241921	-2.93739	2.88901	-0.189543	-2.93454	2.55546
225	-0.129997	-3.29071	3.03072	-0.108318	-2.99046	2.77382	-0.202539	-2.91652	2.51144
226	-0.651635	-3.80418	2.50091	-0.369035	-3.23358	2.49551	-0.354184	-3.05068	2.34232
227	-1.27987	-4.43738	1.87764	-0.757869	-3.61791	2.10217	-0.634181	-3.32917	2.06081
228	-1.87766	-5.03494	1.27961	-1.20469	-4.06345	1.65406	-0.964567	-3.66334	1.73421
229	-2.39277	-5.53934	0.753798	-1.67806	-4.53753	1.1814	-1.33294	-4.03464	1.36875
230	-2.67089	-5.79851	0.456741	-2.01913	-4.87809	0.839818	-1.594	-4.29277	1.10477
231	-2.65495	-5.76205	0.45215	-2.20295	-5.05849	0.652586	-1.73254	-4.42139	0.95631
232	-2.3977	-5.49364	0.698236	-2.21067	-5.06114	0.639806	-1.7586	-4.43191	0.914711
233	-1.88525	-4.97864	1.20813	-1.97395	-4.81596	0.868067	-1.60272	-4.25777	1.05233
234	-1.18064	-4.28254	1.92126	-1.53868	-4.37966	1.3023	-1.27927	-3.92632	1.36779
235	-0.405267	-3.5227	2.71216	-0.929742	-3.77978	1.9203	-0.804539	-3.4571	1.84802
236	0.356196	-2.7757	3.48809	-0.209164	-3.07573	2.6574	-0.204876	-2.87473	2.46498
237	0.993455	-2.15364	4.14055	0.512931	-2.37449	3.40035	0.417271	-2.2763	3.11084
238	1.29201	-1.86662	4.45065	1.00075	-1.90063	3.90213	0.858071	-1.85319	3.56934
239	1.3038	-1.86055	4.46815	1.24553	-1.65668	4.14773	1.1212	-1.5928	3.83521
240	1.06892	-2.09169	4.22954	1.2341	-1.65363	4.12183	1.1714	-1.52581	3.86861
241	0.573053	-2.56832	3.71443	0.892275	-1.96639	3.75094	0.928732	-1.73725	3.59471
242	-0.0143513	-3.12873	3.10003	0.330162	-2.50003	3.16035	0.465484	-2.17311	3.10408
243	-0.639101	-3.71906	2.44086	-0.358838	-3.16394	2.44626	-0.159506	-2.78138	2.46237
244	-1.0991	-4.13647	1.93827	-1.01802	-3.79725	1.76121	-0.818812	-3.43073	1.7931
245	-1.31522	-4.30644	1.67601	-1.5404	-4.28998	1.20918	-1.42458	-4.02515	1.17599
246	-1.25535	-4.20649	1.69579	-1.83434	-4.55311	0.884428	-1.86356	-4.44645	0.719317
247	-1.0661	-4.00004	1.86785	-1.97236	-4.67195	0.727224	-2.17852	-4.74322	0.386189
248	-0.726179	-3.68583	2.23347	-1.90371	-4.61682	0.809386	-2.30169	-4.86984	0.266462
249	-0.354017	-3.3821	2.67406	-1.69931	-4.46568	1.06706	-2.27783	-4.88292	0.327253
250	-0.119489	-3.2342	2.99522	-1.50442	-4.34589	1.33704	-2.20193	-4.86906	0.465207
251	-0.118534	-3.3044	3.06733	-1.40486	-4.31441	1.50469
252	-0.302823	-3.5181	2.91246	-1.37056	-4.31453	1.57341
253	-0.654718	-3.83512	2.52568	-1.41678	-4.34019	1.50663
254	-1.09952	-4.20153	2.00249	-1.51241	-4.37613	1.35132
255	-1.53804	-4.56342	1.48734	-1.63576	-4.43901	1.16749
256	-1.95901	-4.95112	1.03309	-1.7425	-4.5215	1.0365
257	-2.21875	-5.25182	0.814328	-1.77069	-4.5885	1.04712
258	-2.28428	-5.40494	0.836385	-1.69032	-4.58394	1.2033
259	-2.22548	-5.44176	0.990795	-1.54096	-4.51282	1.4309
260	-2.02637	-5.30624	1.25349	-1.33652	-4.35164	1.67861
261	-1.85453	-5.1433	1.43423	-1.19099	-4.19675	1.81477
262	-1.60824	-4.8592	1.64272	-1.01741	-3.97351	1.9387
263	-1.38439	-4.57397	1.80518	-0.88687	-3.78131	2.00757
264	-1.23537	-4.37866	1.90793	-0.817525	-3.67644	2.04139
265	-1.10617	-4.23992	2.02758	-0.769831	-3.63445	2.09479
266	-0.892132	-4.04834	2.26408	-0.694989	-3.59268	2.2027
267	-0.740281	-3.92793	2.44736	-0.673299	-3.60314	2.25654
268	-0.646491	-3.8451	2.55212	-0.714275	-3.64805	2.2195
269	-0.503955	-3.68193	2.67402	-0.688474	-3.59331	2.21637
270	-0.389459	-3.52392	2.74501	-0.674471	-3.53546	2.18651
271	-0.256287	-3.34386	2.83128	-0.61704	-3.44335	2.20927
272	-0.191517	-3.25504	2.87201	-0.543408	-3.36716	2.28035
273	-0.110868	-3.17246	2.95073	-0.403025	-3.25016	2.44411
274	-0.00729325	-3.07241	3.05782	-0.220001	-3.0936	2.6536
275	0.144898	-2.91323	3.20302	0.0272323	-2.85522	2.90968
276	0.309225	-2.71778	3.33623	0.301036	-2.55897	3.16104
277	0.59966	-2.38184	3.58116	0.658411	-2.15783	3.47465
278	0.992463	-1.95455	3.93947	1.07609	-1.69844	3.85063
279	1.47989	-1.46058	4.42036	1.53153	-1.22615	4.2892
280	2.03563	-0.932137	5.00339	2.02709	-0.75342	4.80761
281	2.7007	-0.315917	5.71732	2.60203	-0.232835	5.43691
282	3.42888	0.359839	6.49791	3.24435	0.346089	6.1426
283	4.17168	1.05728	7.28608	3.90811	0.953654	6.86257
284	4.87573	1.71818	8.03327	4.52525	1.52885	7.52165
285	5.35859	2.16399	8.55319	4.9969	1.97552	8.01827
286	5.60268	2.3857	8.81965	5.25691	2.23192	8.2819
287	5.60702	2.3908	8.82323	5.29121	2.28183	8.30059
288	5.28956	2.09983	8.4793	5.00518	2.02898	7.98139
289	4.70015	1.55727	7.84303	4.40472	1.47505	7.3344
290	3.88567	0.787104	6.98424	3.56769	0.681467	6.45391
291	3.07829	-0.0156988	6.17228	2.66347	-0.209282	5.53622
292	2.38894	-0.744998	5.52287	1.82239	-1.07185	4.71664
293	1.89683	-1.29025	5.08391	1.15333	-1.78084	4.0875
294	1.68572	-1.54215	4.91359	0.766592	-2.20466	3.73784
295	1.81387	-1.41634	5.04408	0.695947	-2.28612	3.67801
296	2.16598	-1.01742	5.34939	0.921682	-2.0327	3.87606
297	2.60688	-0.51086	5.72463	1.3104	-1.59632	4.21712
298	2.99956	-0.0691708	6.0683	1.77696	-1.09148	4.6454
299	3.23088	0.17493	6.28683	2.18564	-0.672081	5.04336
300	3.21892	0.145417	6.29242	2.44654	-0.424162	5.31724
301	2.80749	-0.287145	5.90212
302	2.20832	-0.901061	5.31771
303	1.46548	-1.6419	4.57287
304	0.694049	-2.40703	3.79513
305	0.099527	-2.99334	3.19239
306	-0.151569	-3.22926	2.92612
307	-0.0410505	-3.10567	3.02357
308	0.428082	-2.62815	3.48431
309	1.22847	-1.83436	4.29131
310	2.18925	-0.894787	5.27329
311	3.12441	0.0119012	6.23691
312	3.87485	0.745199	7.0045
313	4.31165	1.18856	7.43473
314	4.36203	1.25982	7.46425
315	4.06612	0.978202	7.15403
316	3.48148	0.385528	6.57744
317	2.73445	-0.397711	5.8666
318	2.01337	-1.16542	5.19216
319	1.32267	-1.89397	4.53931
320	0.806809	-2.42086	4.03448
321	0.556833	-2.64818	3.76185
322	0.580495	-2.5831	3.74409
323	0.705639	-2.40454	3.81582
324	0.945445	-2.11446	4.00535
325	1.14656	-1.88152	4.17463
326	1.40278	-1.62558	4.43113
327	1.69172	-1.37481	4.75825
328	1.96457	-1.16639	5.09553
329	2.33144	-0.860405	5.52329
330	2.72426	-0.503392	5.95191
331	3.3143	0.0980658	6.53054
332	4.03616	0.873483	7.19884
333	4.79741	1.70637	7.88844
334	5.53292	2.49801	8.56783
335	6.1921	3.17221	9.212
336	6.65888	3.60103	9.71673
337	6.81657	3.69369	9.93945
338	6.75631	3.56699	9.94563
339	6.43457	3.19607	9.67306
340	5.81096	2.55666	9.06526
341	4.97488	1.74511	8.20465
342	4.01601	0.838237	7.19378
343	3.0121	-0.103219	6.12742
344	2.11764	-0.952114	5.18739
345	1.4014	-1.65954	4.46235
346	0.898122	-2.19333	3.98958
347	0.762136	-2.37559	3.89987
348	0.905859	-2.26923	4.08095
349	1.27564	-1.91281	4.4641
350	1.89277	-1.28705	5.07258

[truncated: 9 more sheets: S1_Panel_E, S1_Panel_F, S1_Panel_G, S1_Panel_H, S1_Panel_I, S1_Panel_J, S1_Panel_K, S1_Panel_L, S2]
