# Supplementary material for: Rapid stimulus-driven modulation of slow ocular position drifts
Source: eLife. 2020 Aug 6;9:e57595. doi: 10.7554/eLife.57595 (PMC7442486; doi:10.7554/eLife.57595)
Supplement: Figure 2—source data 1. [file elife-57595-fig2-data1.xlsx]

## Sheet: Panel_A
time	vLeftEyePosControl_Mean	vLeftEyePosControl_95ci_low	vLeftEyePosControl_95ci_up	vLeftEyePosFull_Mean	vLeftEyePosFull_95ci_low	vLeftEyePosFull_95ci_up	vRightEyePosControl_Mean	vRightEyePosControl_95ci_low	vRightEyePosControl_95ci_up	vRightEyePosFull_Mean	vRightEyePosFull_95ci_low	vRightEyePosFull_95ci_up
-100	-0.85181	-1.0109	-0.692724	-0.841544	-0.974301	-0.708788	-0.825282	-0.977652	-0.672913	-0.788415	-0.9318	-0.64503
-99	-0.872512	-1.02502	-0.720007	-0.789818	-0.922738	-0.656899	-0.818518	-0.969094	-0.667942	-0.81045	-0.952582	-0.668317
-98	-0.858458	-1.01069	-0.706222	-0.780348	-0.911672	-0.649023	-0.78373	-0.935721	-0.63174	-0.819794	-0.958817	-0.68077
-97	-0.823685	-0.977742	-0.669627	-0.782752	-0.915389	-0.650116	-0.795182	-0.951278	-0.639086	-0.766787	-0.906363	-0.627211
-96	-0.834554	-0.988021	-0.681086	-0.761306	-0.895251	-0.627361	-0.772618	-0.925812	-0.619425	-0.753851	-0.891579	-0.616122
-95	-0.840472	-0.989553	-0.691391	-0.803185	-0.932864	-0.673507	-0.800669	-0.946204	-0.655135	-0.703826	-0.84585	-0.561802
-94	-0.829378	-0.975331	-0.683424	-0.793785	-0.918227	-0.669343	-0.770578	-0.914763	-0.626392	-0.713626	-0.852414	-0.574837
-93	-0.822439	-0.969375	-0.675502	-0.762708	-0.885741	-0.639674	-0.774245	-0.920976	-0.627514	-0.710831	-0.847916	-0.573747
-92	-0.784301	-0.933942	-0.634661	-0.722834	-0.858839	-0.58683	-0.755933	-0.899734	-0.612132	-0.757053	-0.892441	-0.621664
-91	-0.754792	-0.906725	-0.602858	-0.736368	-0.865823	-0.606913	-0.718076	-0.860538	-0.575614	-0.744507	-0.877332	-0.611682
-90	-0.719277	-0.868438	-0.570116	-0.754801	-0.873062	-0.636539	-0.754273	-0.89377	-0.614776	-0.704279	-0.840945	-0.567613
-89	-0.757339	-0.899922	-0.614755	-0.730212	-0.844597	-0.615827	-0.737121	-0.883658	-0.590584	-0.673124	-0.810989	-0.535259
-88	-0.783751	-0.926724	-0.640778	-0.740018	-0.85399	-0.626046	-0.724385	-0.867209	-0.581562	-0.6749	-0.81128	-0.538521
-87	-0.76947	-0.90908	-0.62986	-0.712897	-0.832206	-0.593589	-0.752944	-0.895022	-0.610866	-0.68481	-0.821657	-0.547962
-86	-0.752829	-0.890456	-0.615202	-0.673854	-0.793993	-0.553716	-0.753121	-0.892777	-0.613464	-0.720076	-0.850003	-0.590148
-85	-0.763431	-0.898333	-0.628528	-0.655486	-0.772164	-0.538809	-0.758867	-0.900345	-0.617388	-0.706428	-0.832739	-0.580118
-84	-0.750787	-0.884393	-0.617182	-0.638733	-0.756506	-0.520961	-0.711854	-0.854089	-0.569619	-0.690897	-0.820281	-0.561514
-83	-0.737518	-0.868821	-0.606215	-0.680454	-0.801677	-0.55923	-0.709243	-0.848943	-0.569542	-0.644482	-0.770312	-0.518652
-82	-0.728665	-0.859379	-0.59795	-0.697019	-0.820321	-0.573716	-0.731461	-0.873139	-0.589783	-0.622461	-0.747361	-0.497561
-81	-0.717685	-0.841448	-0.593922	-0.676698	-0.800954	-0.552442	-0.722482	-0.867953	-0.57701	-0.64344	-0.763528	-0.523351
-80	-0.700598	-0.821548	-0.579648	-0.657794	-0.778042	-0.537545	-0.682044	-0.821236	-0.542851	-0.60924	-0.728969	-0.48951
-79	-0.683103	-0.806418	-0.559788	-0.624915	-0.747764	-0.502065	-0.677242	-0.813305	-0.541178	-0.608893	-0.733148	-0.484638
-78	-0.708845	-0.833739	-0.583952	-0.627303	-0.746718	-0.507887	-0.634303	-0.773473	-0.495133	-0.63463	-0.760641	-0.508619
-77	-0.716545	-0.837525	-0.595565	-0.629753	-0.749702	-0.509804	-0.620438	-0.760674	-0.480202	-0.631302	-0.750023	-0.512581
-76	-0.700498	-0.819522	-0.581473	-0.613677	-0.730057	-0.497296	-0.641161	-0.786514	-0.495808	-0.620221	-0.74015	-0.500291
-75	-0.705409	-0.823625	-0.587193	-0.60824	-0.725756	-0.490723	-0.626951	-0.765855	-0.488046	-0.618168	-0.738189	-0.498147
-74	-0.690817	-0.810619	-0.571016	-0.58789	-0.700413	-0.475366	-0.607962	-0.7424	-0.473524	-0.629947	-0.748595	-0.511299
-73	-0.664598	-0.781335	-0.547861	-0.595874	-0.708257	-0.483492	-0.603168	-0.736589	-0.469748	-0.625853	-0.743841	-0.507866
-72	-0.662815	-0.787509	-0.538121	-0.602451	-0.716097	-0.488806	-0.595435	-0.724823	-0.466047	-0.618459	-0.737562	-0.499356
-71	-0.658765	-0.782996	-0.534535	-0.602618	-0.715294	-0.489941	-0.588094	-0.715164	-0.461024	-0.576525	-0.695369	-0.45768
-70	-0.641374	-0.764232	-0.518515	-0.596391	-0.7085	-0.484282	-0.595457	-0.722587	-0.468326	-0.596057	-0.714266	-0.477849
-69	-0.639	-0.759523	-0.518477	-0.561943	-0.676425	-0.447462	-0.539607	-0.669856	-0.409358	-0.632417	-0.749882	-0.514952
-68	-0.565144	-0.684494	-0.445794	-0.548878	-0.667723	-0.430033	-0.57093	-0.704873	-0.436986	-0.607908	-0.72665	-0.489167
-67	-0.54567	-0.664059	-0.427282	-0.520142	-0.636364	-0.403921	-0.54059	-0.674933	-0.406248	-0.587992	-0.70914	-0.466845
-66	-0.564798	-0.678919	-0.450678	-0.529267	-0.649106	-0.409427	-0.541282	-0.675034	-0.407529	-0.547483	-0.669357	-0.425608
-65	-0.561029	-0.679769	-0.442288	-0.516593	-0.633496	-0.399691	-0.535927	-0.666785	-0.405069	-0.542382	-0.664977	-0.419788
-64	-0.555686	-0.670658	-0.440714	-0.525182	-0.63747	-0.412893	-0.504994	-0.632924	-0.377064	-0.508812	-0.628249	-0.389375
-63	-0.542727	-0.659213	-0.42624	-0.5247	-0.636107	-0.413294	-0.505452	-0.630791	-0.380112	-0.515856	-0.631218	-0.400494
-62	-0.542624	-0.6586	-0.426649	-0.521811	-0.633153	-0.410468	-0.493797	-0.621964	-0.365631	-0.48703	-0.600144	-0.373916
-61	-0.514271	-0.630701	-0.39784	-0.476072	-0.58744	-0.364704	-0.513437	-0.647989	-0.378885	-0.534469	-0.644476	-0.424463
-60	-0.50847	-0.623555	-0.393385	-0.487588	-0.596581	-0.378594	-0.488005	-0.618494	-0.357516	-0.474267	-0.584822	-0.363712
-59	-0.508309	-0.629623	-0.386995	-0.488265	-0.597423	-0.379107	-0.447659	-0.570448	-0.32487	-0.45028	-0.566544	-0.334017
-58	-0.490537	-0.608693	-0.372382	-0.480531	-0.585368	-0.375693	-0.453213	-0.574708	-0.331717	-0.461522	-0.580099	-0.342945
-57	-0.477315	-0.595338	-0.359291	-0.45119	-0.557153	-0.345226	-0.463404	-0.584757	-0.342051	-0.501098	-0.620294	-0.381902
-56	-0.458464	-0.575157	-0.341771	-0.419846	-0.525331	-0.314361	-0.481465	-0.598555	-0.364376	-0.463812	-0.579009	-0.348615
-55	-0.424857	-0.537541	-0.312172	-0.377658	-0.498139	-0.257176	-0.453551	-0.573282	-0.333821	-0.464273	-0.59014	-0.338406
-54	-0.449264	-0.558215	-0.340314	-0.369268	-0.479103	-0.259433	-0.410048	-0.536634	-0.283461	-0.450697	-0.570903	-0.330491
-53	-0.441822	-0.548889	-0.334756	-0.374977	-0.478827	-0.271128	-0.416734	-0.533947	-0.299521	-0.434663	-0.548901	-0.320425
-52	-0.43574	-0.542496	-0.328984	-0.41216	-0.513803	-0.310517	-0.454934	-0.568177	-0.341691	-0.398091	-0.509786	-0.286395
-51	-0.399507	-0.508073	-0.290941	-0.371243	-0.467769	-0.274716	-0.44529	-0.557376	-0.333205	-0.444066	-0.554818	-0.333313
-50	-0.421848	-0.529181	-0.314515	-0.358449	-0.455036	-0.261862	-0.410356	-0.527336	-0.293375	-0.441876	-0.5505	-0.333252
-49	-0.430632	-0.534447	-0.326817	-0.384238	-0.480268	-0.288208	-0.42929	-0.546067	-0.312514	-0.40703	-0.513194	-0.300867
-48	-0.403001	-0.504544	-0.301458	-0.381153	-0.477074	-0.285232	-0.401607	-0.513355	-0.289858	-0.401206	-0.504751	-0.297662
-47	-0.404558	-0.505489	-0.303627	-0.376777	-0.474432	-0.279122	-0.35838	-0.471746	-0.245014	-0.406057	-0.512646	-0.299467
-46	-0.386863	-0.484605	-0.289121	-0.375306	-0.47189	-0.278721	-0.359345	-0.467287	-0.251402	-0.395962	-0.501313	-0.290612
-45	-0.386305	-0.485337	-0.287273	-0.370769	-0.468175	-0.273364	-0.360781	-0.465663	-0.255899	-0.35845	-0.46081	-0.256091
-44	-0.39052	-0.487801	-0.29324	-0.353989	-0.447842	-0.260135	-0.350004	-0.458638	-0.241369	-0.328653	-0.434546	-0.222759
-43	-0.353389	-0.448693	-0.258085	-0.340583	-0.4326	-0.248565	-0.36496	-0.476762	-0.253158	-0.365232	-0.472438	-0.258026
-42	-0.346511	-0.451396	-0.241626	-0.317772	-0.412088	-0.223457	-0.385749	-0.498593	-0.272905	-0.379937	-0.48786	-0.272014
-41	-0.322164	-0.426809	-0.217519	-0.310511	-0.404975	-0.216048	-0.345037	-0.46033	-0.229743	-0.385852	-0.488254	-0.28345
-40	-0.317349	-0.418226	-0.216471	-0.301453	-0.396043	-0.206863	-0.317511	-0.426001	-0.209022	-0.366276	-0.463935	-0.268618
-39	-0.30201	-0.399042	-0.204978	-0.310162	-0.404728	-0.215596	-0.316456	-0.426884	-0.206028	-0.36781	-0.471868	-0.263753
-38	-0.276666	-0.374431	-0.178901	-0.316733	-0.413298	-0.220169	-0.359636	-0.472033	-0.247239	-0.343724	-0.445066	-0.242383
-37	-0.26918	-0.365086	-0.173273	-0.316792	-0.413513	-0.22007	-0.321829	-0.433467	-0.210192	-0.293874	-0.397254	-0.190495
-36	-0.267725	-0.362451	-0.172999	-0.337918	-0.429225	-0.246612	-0.299644	-0.405543	-0.193745	-0.280285	-0.376022	-0.184548
-35	-0.285188	-0.38494	-0.185437	-0.312578	-0.402075	-0.223082	-0.307074	-0.413998	-0.20015	-0.292324	-0.389607	-0.195042
-34	-0.269058	-0.363393	-0.174723	-0.29937	-0.387438	-0.211302	-0.297508	-0.400485	-0.19453	-0.291528	-0.387102	-0.195953
-33	-0.253508	-0.346182	-0.160833	-0.34503	-0.431603	-0.258456	-0.247436	-0.353233	-0.141639	-0.254317	-0.350625	-0.158008
-32	-0.221731	-0.31828	-0.125181	-0.309419	-0.393223	-0.225615	-0.255334	-0.360557	-0.150111	-0.265113	-0.356624	-0.173603
-31	-0.203168	-0.296936	-0.109401	-0.267775	-0.353147	-0.182402	-0.273485	-0.374645	-0.172326	-0.302715	-0.391396	-0.214034
-30	-0.225629	-0.318181	-0.133076	-0.283894	-0.362252	-0.205537	-0.26787	-0.371243	-0.164496	-0.250165	-0.333124	-0.167205
-29	-0.20365	-0.298104	-0.109196	-0.251421	-0.330357	-0.172486	-0.27159	-0.3814	-0.161779	-0.259657	-0.345446	-0.173868
-28	-0.213597	-0.305794	-0.1214	-0.224511	-0.307665	-0.141356	-0.233784	-0.34055	-0.127017	-0.256401	-0.342952	-0.16985
-27	-0.191233	-0.280646	-0.101819	-0.212052	-0.292173	-0.131931	-0.250568	-0.356516	-0.14462	-0.246602	-0.335332	-0.157872
-26	-0.166978	-0.258231	-0.0757249	-0.209184	-0.286172	-0.132195	-0.266449	-0.367482	-0.165416	-0.215677	-0.30094	-0.130414
-25	-0.155871	-0.245896	-0.0658452	-0.230179	-0.307878	-0.15248	-0.260811	-0.364903	-0.156719	-0.172269	-0.258405	-0.0861321
-24	-0.141964	-0.230477	-0.0534509	-0.208896	-0.286795	-0.130997	-0.22322	-0.323006	-0.123435	-0.18716	-0.272988	-0.101331
-23	-0.121819	-0.213078	-0.0305613	-0.178744	-0.256595	-0.100893	-0.245082	-0.340793	-0.14937	-0.213979	-0.299063	-0.128895
-22	-0.132499	-0.228071	-0.0369262	-0.155993	-0.235234	-0.0767512	-0.214063	-0.317857	-0.110268	-0.224602	-0.311422	-0.137781
-21	-0.131886	-0.215369	-0.0484026	-0.183648	-0.267411	-0.0998843	-0.20666	-0.308836	-0.104485	-0.176157	-0.261303	-0.0910109
-20	-0.0911611	-0.174827	-0.00749566	-0.196602	-0.277111	-0.116093	-0.191836	-0.291895	-0.091776	-0.16765	-0.250822	-0.0844778
-19	-0.0822829	-0.1675	0.00293385	-0.179316	-0.25848	-0.100152	-0.171602	-0.274477	-0.0687276	-0.163879	-0.247022	-0.0807358
-18	-0.0610235	-0.149999	0.0279515	-0.172529	-0.248948	-0.0961095	-0.215507	-0.312787	-0.118228	-0.157639	-0.238595	-0.0766831
-17	-0.0747883	-0.161934	0.0123571	-0.141106	-0.218436	-0.063776	-0.205462	-0.300428	-0.110495	-0.171767	-0.250775	-0.0927603
-16	-0.10232	-0.185463	-0.0191768	-0.131267	-0.212284	-0.0502514	-0.205461	-0.294855	-0.116068	-0.172521	-0.255283	-0.0897583
-15	-0.125191	-0.210569	-0.0398121	-0.136098	-0.213918	-0.0582788	-0.172575	-0.264924	-0.0802263	-0.156339	-0.237061	-0.075617
-14	-0.0952399	-0.179855	-0.0106251	-0.14056	-0.219537	-0.0615836	-0.190397	-0.280675	-0.100119	-0.111091	-0.189159	-0.0330225
-13	-0.105691	-0.207995	-0.00338681	-0.12855	-0.205603	-0.0514981	-0.194237	-0.299388	-0.089085	-0.144838	-0.223545	-0.0661314
-12	-0.0675883	-0.167022	0.0318455	-0.133524	-0.211098	-0.0559504	-0.202483	-0.298155	-0.106811	-0.159166	-0.240308	-0.0780245
-11	-0.0829514	-0.173846	0.00794302	-0.127009	-0.201906	-0.0521118	-0.181049	-0.272011	-0.0900873	-0.149829	-0.228639	-0.071019
-10	-0.104009	-0.18136	-0.0266579	-0.105069	-0.179699	-0.0304387	-0.155854	-0.239843	-0.071864	-0.110011	-0.187826	-0.0321955
-9	-0.0996851	-0.171486	-0.0278842	-0.119956	-0.19278	-0.0471326	-0.138489	-0.217666	-0.0593114	-0.111198	-0.19053	-0.0318663
-8	-0.102162	-0.172172	-0.0321509	-0.0861752	-0.157917	-0.0144333	-0.126692	-0.213069	-0.0403146	-0.127981	-0.203547	-0.0524155
-7	-0.068119	-0.134789	-0.0014489	-0.0599009	-0.129331	0.00952894	-0.133294	-0.222133	-0.0444541	-0.108337	-0.180137	-0.0365362
-6	-0.0748657	-0.144428	-0.00530342	-0.0473373	-0.118714	0.024039	-0.117761	-0.202994	-0.032528	-0.0809751	-0.151328	-0.0106222
-5	-0.0610072	-0.129631	0.00761697	-0.0390264	-0.105131	0.0270782	-0.1001	-0.173395	-0.026805	-0.0788539	-0.147878	-0.00983013
-4	-0.0608009	-0.126832	0.00522983	-0.0376955	-0.0995944	0.0242033	-0.0375382	-0.109732	0.0346554	-0.0928957	-0.162074	-0.023717
-3	-0.0843721	-0.149026	-0.019718	-0.0165333	-0.0771725	0.044106	-0.0151549	-0.0899721	0.0596623	-0.0668223	-0.132564	-0.00108108
-2	-0.047805	-0.110349	0.0147393	0.00601238	-0.0493553	0.06138	-0.0725503	-0.139026	-0.00607464	-0.0300847	-0.0918079	0.0316385
-1	-0.025566	-0.0720464	0.0209143	0.00533379	-0.0366134	0.0472809	-0.0358106	-0.0895267	0.0179054	-0.0307799	-0.0767464	0.0151867
0	0	0	0	0	0	0	0	0	0	0	0	0
1	0.0161927	-0.0256217	0.0580072	0.0203261	-0.0181494	0.0588015	-0.0141279	-0.0634004	0.0351446	0.0193382	-0.0304445	0.0691209
2	0.0379111	-0.0212535	0.0970757	0.00685245	-0.0403204	0.0540253	-0.041261	-0.11067	0.028148	0.0374402	-0.0274337	0.102314
3	0.0355083	-0.0284052	0.0994217	0.0267376	-0.0268345	0.0803097	-0.0363144	-0.114334	0.0417051	0.00742481	-0.0625041	0.0773537
4	-0.00238748	-0.0712932	0.0665182	0.0269434	-0.0328967	0.0867835	0.0204061	-0.063852	0.104664	0.00538728	-0.0656487	0.0764232
5	0.0227267	-0.0482852	0.0937386	0.0325913	-0.0290841	0.0942668	0.0100616	-0.0739391	0.0940623	0.0170957	-0.0547642	0.0889556
6	0.0428552	-0.0269565	0.112667	0.0162713	-0.0441079	0.0766504	-0.00437645	-0.0815313	0.0727784	0.00260536	-0.0729718	0.0781825
7	0.0416102	-0.0315456	0.114766	0.0662771	0.00383349	0.128721	-0.00227805	-0.0857465	0.0811904	-0.0274453	-0.101996	0.0471056
8	0.0436782	-0.0291266	0.116483	0.0431163	-0.020211	0.106444	-0.0042907	-0.0870667	0.0784853	0.00297958	-0.0751499	0.0811091
9	0.0695735	-0.00841021	0.147557	0.0394827	-0.0278233	0.106789	0.0437648	-0.0388136	0.126343	0.00705925	-0.071607	0.0857255
10	0.0433801	-0.0283237	0.115084	0.0510605	-0.0177497	0.119871	0.0732121	-0.00593658	0.152361	0.0365988	-0.0399508	0.113148
11	0.0626732	-0.0128169	0.138163	0.0831521	0.0165694	0.149735	0.0450508	-0.0399395	0.130041	0.0469543	-0.0277721	0.121681
12	0.0878473	0.000310789	0.175384	0.0881682	0.0163995	0.159937	0.0408979	-0.0482485	0.130044	0.0719914	-0.0074168	0.151399
13	0.102832	0.0138548	0.191809	0.111035	0.0382298	0.18384	0.0462292	-0.0437407	0.136199	0.0411968	-0.0403038	0.122697
14	0.0787229	-0.00288383	0.16033	0.145996	0.0722133	0.219778	0.116387	0.0271628	0.205611	-0.00330801	-0.0818956	0.0752795
15	0.090499	0.0106248	0.170373	0.11709	0.0424067	0.191773	0.0903101	8.42776e-05	0.180536	0.0303756	-0.048221	0.108972
16	0.123511	0.0418515	0.20517	0.131938	0.0517516	0.212124	0.102571	0.0114744	0.193668	0.0306414	-0.0497698	0.111053
17	0.136573	0.0543728	0.218772	0.133673	0.0563639	0.210983	0.114533	0.0267641	0.202302	0.0373381	-0.0427184	0.117395
18	0.156589	0.0709533	0.242226	0.115184	0.037781	0.192587	0.153824	0.0663363	0.241313	0.108119	0.026331	0.189907
19	0.147533	0.0626625	0.232403	0.168509	0.0875313	0.249487	0.159191	0.0700221	0.248359	0.0828277	-0.00501809	0.170674
20	0.153626	0.0738415	0.23341	0.184276	0.102553	0.266	0.142586	0.0475568	0.237616	0.0498383	-0.0428682	0.142545
21	0.159506	0.0787223	0.240289	0.193602	0.112316	0.274888	0.163107	0.0728215	0.253393	0.086533	-0.00767885	0.180745
22	0.193758	0.115772	0.271744	0.142279	0.0579981	0.226559	0.151875	0.0634696	0.24028	0.0994804	0.00642923	0.192532
23	0.210525	0.13114	0.289911	0.175174	0.0890873	0.261261	0.15257	0.0642626	0.240877	0.0797498	-0.0110422	0.170542
24	0.212898	0.13257	0.293227	0.1789	0.0963942	0.261406	0.186862	0.0844907	0.289233	0.112867	0.0185325	0.207202
25	0.215152	0.129657	0.300648	0.194275	0.108176	0.280374	0.204884	0.107054	0.302714	0.126603	0.0321843	0.221022
26	0.213907	0.129363	0.298452	0.200246	0.111062	0.28943	0.195303	0.102631	0.287974	0.14076	0.0450554	0.236465
27	0.198425	0.106528	0.290323	0.194808	0.110713	0.278903	0.242004	0.147182	0.336827	0.137734	0.0447742	0.230693
28	0.228676	0.139126	0.318227	0.181262	0.0948793	0.267645	0.246234	0.145505	0.346964	0.141606	0.0497804	0.233432
29	0.261543	0.167807	0.355279	0.195194	0.109482	0.280907	0.256939	0.157606	0.356273	0.158908	0.0651425	0.252674
30	0.276149	0.182473	0.369826	0.230809	0.141326	0.320291	0.267158	0.170623	0.363693	0.137599	0.0422833	0.232914
31	0.275715	0.188465	0.362966	0.229345	0.13869	0.319999	0.28992	0.191499	0.388341	0.133789	0.0314377	0.23614
32	0.29598	0.212413	0.379547	0.217493	0.13192	0.303066	0.293173	0.190347	0.395998	0.156492	0.0557625	0.257222
33	0.287698	0.195714	0.379682	0.211561	0.121084	0.302038	0.287188	0.185974	0.388402	0.198262	0.104136	0.292389
34	0.311775	0.221973	0.401576	0.208039	0.116788	0.29929	0.252802	0.150061	0.355543	0.207211	0.110451	0.303971
35	0.335111	0.246593	0.423629	0.232559	0.141271	0.323848	0.295653	0.18852	0.402787	0.171758	0.0733485	0.270168
36	0.346653	0.254926	0.43838	0.238935	0.150374	0.327496	0.328867	0.216247	0.441487	0.198137	0.102388	0.293886
37	0.34656	0.254404	0.438716	0.244185	0.155807	0.332564	0.336901	0.232034	0.441767	0.205136	0.105587	0.304684
38	0.38121	0.286405	0.476014	0.271097	0.179509	0.362685	0.331447	0.223784	0.439111	0.212433	0.114076	0.310789
39	0.41306	0.310411	0.51571	0.29116	0.198959	0.38336	0.331213	0.217705	0.444721	0.210618	0.111555	0.309681
40	0.389293	0.291684	0.486902	0.279273	0.184456	0.374091	0.340416	0.225758	0.455074	0.222243	0.124815	0.31967
41	0.364974	0.274333	0.455616	0.311913	0.216561	0.407265	0.359444	0.246728	0.472161	0.205443	0.101395	0.309492
42	0.362629	0.270504	0.454755	0.32022	0.222317	0.418124	0.37568	0.267799	0.483561	0.216958	0.114554	0.319362
43	0.373623	0.281817	0.465429	0.310783	0.213683	0.407883	0.41038	0.303604	0.517157	0.281031	0.174808	0.387254
44	0.394016	0.29846	0.489572	0.320049	0.22523	0.414868	0.391428	0.281581	0.501274	0.271984	0.1686	0.375367
45	0.371354	0.277953	0.464755	0.324502	0.231119	0.417885	0.376839	0.258534	0.495144	0.266287	0.16546	0.367115
46	0.36544	0.272177	0.458703	0.331702	0.233652	0.429753	0.389139	0.275453	0.502826	0.309229	0.206622	0.411836
47	0.371799	0.276199	0.467398	0.338565	0.237815	0.439315	0.428946	0.313669	0.544223	0.319439	0.21398	0.424898
48	0.368967	0.263798	0.474136	0.347896	0.249437	0.446355	0.427761	0.314107	0.541415	0.299782	0.191839	0.407725
49	0.387385	0.28132	0.49345	0.391472	0.290295	0.49265	0.468264	0.354453	0.582076	0.273342	0.164066	0.382617
50	0.390615	0.286626	0.494605	0.418495	0.314765	0.522226	0.452369	0.332527	0.572211	0.280611	0.17267	0.388551
51	0.388787	0.284274	0.4933	0.415572	0.311261	0.519882	0.474269	0.364102	0.584437	0.322695	0.218865	0.426525
52	0.385052	0.280236	0.489869	0.465884	0.362726	0.569042	0.47832	0.364557	0.592083	0.339022	0.232058	0.445985
53	0.421024	0.315523	0.526525	0.460797	0.354356	0.567237	0.480399	0.36639	0.594408	0.377968	0.267542	0.488395
54	0.412733	0.305807	0.519659	0.497904	0.394275	0.601533	0.449653	0.343546	0.555761	0.387667	0.277411	0.497922
55	0.414528	0.303846	0.525211	0.539167	0.434244	0.64409	0.439509	0.332502	0.546516	0.437151	0.326354	0.547949
56	0.442351	0.330488	0.554215	0.559009	0.4554	0.662617	0.460423	0.348809	0.572037	0.45078	0.338474	0.563085
57	0.485566	0.368363	0.602769	0.60079	0.493904	0.707677	0.453391	0.334953	0.57183	0.467817	0.353522	0.582112
58	0.498729	0.383163	0.614295	0.626633	0.520296	0.73297	0.415488	0.293452	0.537524	0.478742	0.359771	0.597713
59	0.532732	0.418711	0.646753	0.618751	0.512714	0.724789	0.431123	0.311479	0.550767	0.500932	0.382099	0.619766
60	0.535484	0.430018	0.64095	0.620599	0.511403	0.729795	0.43788	0.317575	0.558185	0.515429	0.404161	0.626697
61	0.528901	0.422145	0.635657	0.6781	0.5684	0.787799	0.463911	0.345919	0.581904	0.490818	0.377092	0.604544
62	0.546157	0.432856	0.659458	0.724322	0.617021	0.831622	0.458108	0.34528	0.570935	0.504773	0.394497	0.615048
63	0.532661	0.419807	0.645516	0.770568	0.66319	0.877945	0.526891	0.407706	0.646075	0.540792	0.426451	0.655133
64	0.541389	0.42816	0.654618	0.775471	0.666332	0.88461	0.527096	0.406679	0.647513	0.60579	0.491045	0.720535
65	0.54606	0.433246	0.658874	0.824019	0.714467	0.933572	0.512837	0.393589	0.632085	0.606069	0.491592	0.720546
66	0.524142	0.409856	0.638428	0.843578	0.738881	0.948274	0.527352	0.40662	0.648084	0.644292	0.523388	0.765195
67	0.519181	0.40439	0.633972	0.863666	0.757991	0.96934	0.545548	0.421736	0.66936	0.701475	0.582649	0.820302
68	0.550949	0.440806	0.661092	0.897905	0.791167	1.00464	0.538059	0.408251	0.667866	0.695691	0.577151	0.814232
69	0.552623	0.435135	0.67011	0.909195	0.797937	1.02045	0.539694	0.413315	0.666074	0.74312	0.623113	0.863128
70	0.510572	0.385463	0.63568	0.925856	0.813066	1.03865	0.53714	0.412831	0.661449	0.814408	0.693587	0.935229
71	0.536753	0.411392	0.662114	0.983019	0.869976	1.09606	0.558932	0.434647	0.683218	0.860002	0.737228	0.982776
72	0.549444	0.426592	0.672296	1.04291	0.925727	1.16009	0.528072	0.405025	0.651119	0.833207	0.712866	0.953547
73	0.579286	0.454717	0.703854	1.10461	0.985155	1.22407	0.514602	0.389566	0.639637	0.86577	0.743134	0.988406
74	0.560262	0.436096	0.684428	1.13342	1.01742	1.24942	0.534513	0.407132	0.661894	0.964538	0.843912	1.08516
75	0.559479	0.435406	0.683551	1.16554	1.05461	1.27648	0.546815	0.421315	0.672315	1.01055	0.886943	1.13416
76	0.575108	0.454193	0.696023	1.21743	1.10657	1.32829	0.534399	0.407132	0.661666	1.04333	0.918405	1.16826
77	0.590069	0.46529	0.714847	1.27749	1.16398	1.391	0.56581	0.442572	0.689048	1.05015	0.924068	1.17623
78	0.582145	0.462562	0.701728	1.31376	1.19842	1.42911	0.574856	0.447412	0.7023	1.10072	0.975367	1.22607
79	0.602417	0.475012	0.729822	1.34761	1.23034	1.46487	0.548532	0.415141	0.681923	1.15213	1.02731	1.27694
80	0.609268	0.475643	0.742893	1.36854	1.24615	1.49092	0.546329	0.409846	0.682812	1.12759	1.00166	1.25351
81	0.648306	0.513367	0.783245	1.38653	1.25965	1.51341	0.564165	0.427453	0.700877	1.15855	1.03141	1.28569
82	0.652073	0.521183	0.782963	1.37728	1.25367	1.50089	0.57909	0.447503	0.710677	1.20749	1.07877	1.33621
83	0.709685	0.575114	0.844255	1.4033	1.28479	1.52182	0.54657	0.413458	0.679683	1.23199	1.10528	1.35871
84	0.703653	0.575114	0.832193	1.4053	1.28315	1.52744	0.574829	0.438893	0.710764	1.23822	1.11344	1.36299
85	0.716733	0.593431	0.840036	1.42058	1.30272	1.53844	0.631362	0.495375	0.767349	1.26512	1.13831	1.39194
86	0.703316	0.57536	0.831272	1.44114	1.32119	1.56109	0.651743	0.518254	0.785233	1.27453	1.15237	1.39668
87	0.736184	0.603444	0.868925	1.45416	1.3329	1.57542	0.650821	0.51969	0.781952	1.30283	1.17576	1.4299
88	0.726856	0.587399	0.866314	1.46539	1.33955	1.59123	0.639989	0.503743	0.776235	1.35398	1.22629	1.48166
89	0.732221	0.592223	0.87222	1.47798	1.35271	1.60325	0.640922	0.50453	0.777314	1.4153	1.28194	1.54867
90	0.696391	0.560519	0.832263	1.49015	1.3676	1.6127	0.666899	0.527928	0.80587	1.41933	1.28513	1.55353
91	0.707816	0.566528	0.849104	1.52111	1.40104	1.64118	0.683767	0.547556	0.819978	1.41466	1.27948	1.54983
92	0.712769	0.569312	0.856225	1.56987	1.4473	1.69244	0.689461	0.546484	0.832438	1.39243	1.25871	1.52615
93	0.714967	0.566705	0.863228	1.59326	1.46612	1.7204	0.704083	0.561486	0.84668	1.42465	1.29358	1.55571
94	0.72046	0.577942	0.862979	1.61383	1.48543	1.74223	0.694009	0.558174	0.829844	1.47715	1.34434	1.60996
95	0.734955	0.588523	0.881387	1.63286	1.50403	1.76169	0.684931	0.546519	0.823343	1.52949	1.39438	1.6646
96	0.734152	0.590045	0.878259	1.63722	1.50718	1.76725	0.677541	0.543894	0.811188	1.5319	1.39493	1.66888
97	0.73817	0.593529	0.882812	1.65659	1.52526	1.78791	0.686114	0.556504	0.815723	1.55912	1.42111	1.69713
98	0.737049	0.594313	0.879785	1.72087	1.59001	1.85174	0.70463	0.572603	0.836656	1.54787	1.40797	1.68777
99	0.719404	0.578352	0.860455	1.73716	1.60423	1.87009	0.702022	0.565175	0.838869	1.58531	1.44982	1.72081
100	0.699046	0.557592	0.840499	1.75533	1.62148	1.88917	0.756721	0.613741	0.8997	1.62466	1.48645	1.76288
101	0.707847	0.565335	0.85036	1.77341	1.63987	1.90694	0.783502	0.646779	0.920226	1.61804	1.47895	1.75714
102	0.721908	0.58012	0.863695	1.81847	1.68367	1.95327	0.752892	0.614725	0.891059	1.63293	1.48857	1.77729
103	0.762246	0.6199	0.904592	1.85946	1.72649	1.99243	0.766356	0.626767	0.905945	1.66037	1.51209	1.80864
104	0.791168	0.648453	0.933883	1.85798	1.71706	1.9989	0.745317	0.603997	0.886636	1.68189	1.52354	1.84023
105	0.761593	0.615539	0.907647	1.8935	1.74785	2.03915	0.754683	0.610987	0.898379	1.66929	1.51804	1.82054
106	0.779396	0.633176	0.925616	1.92314	1.78166	2.06461	0.806206	0.660563	0.951849	1.70954	1.56823	1.85085
107	0.749652	0.604952	0.894352	1.92548	1.78797	2.06299	0.827318	0.679318	0.975317	1.72733	1.58963	1.86503
108	0.739733	0.596432	0.883034	1.9208	1.78239	2.05921	0.812734	0.663695	0.961774	1.75325	1.61331	1.89319
109	0.731606	0.587587	0.875626	1.93139	1.7965	2.06628	0.870249	0.724997	1.0155	1.8078	1.65886	1.95675
110	0.77763	0.626631	0.92863	1.9791	1.84316	2.11503	0.856317	0.708144	1.00449	1.79947	1.64646	1.95248
111	0.805899	0.652129	0.959668	1.993	1.85509	2.13091	0.805722	0.65182	0.959623	1.82598	1.67492	1.97703
112	0.827292	0.672753	0.981831	1.99731	1.85954	2.13508	0.808235	0.652905	0.963565	1.82592	1.68001	1.97183
113	0.797965	0.645291	0.950639	2.04442	1.90516	2.18368	0.859517	0.704929	1.0141	1.82385	1.67836	1.96934
114	0.80822	0.659836	0.956604	2.06356	1.92682	2.20029	0.847637	0.698856	0.996418	1.78754	1.63836	1.93672
115	0.816188	0.666445	0.965931	2.08643	1.95011	2.22276	0.860135	0.71115	1.00912	1.84526	1.69667	1.99386
116	0.860309	0.71197	1.00865	2.10033	1.96494	2.23572	0.879512	0.727761	1.03126	1.89649	1.75017	2.0428
117	0.864251	0.715467	1.01304	2.11106	1.97442	2.24771	0.887719	0.732199	1.04324	1.93287	1.78216	2.08358
118	0.866646	0.718295	1.015	2.13899	2.00057	2.27741	0.873784	0.719806	1.02776	1.93235	1.78315	2.08155
119	0.838102	0.688596	0.987607	2.15701	2.01539	2.29863	0.867085	0.713463	1.02071	1.98549	1.82806	2.14293
120	0.846074	0.696321	0.995828	2.15161	2.01575	2.28747	0.889914	0.731985	1.04784	2.0057	1.84615	2.16526
121	0.891624	0.741742	1.04151	2.13901	2.00135	2.27667	0.897246	0.739971	1.05452	1.97301	1.81549	2.13052
122	0.914517	0.765705	1.06333	2.16336	2.02098	2.30574	0.916768	0.759834	1.0737	1.99823	1.83796	2.1585
123	0.922593	0.771112	1.07407	2.19197	2.04619	2.33776	0.940893	0.78551	1.09628	2.00553	1.84649	2.16457
124	0.951513	0.797625	1.1054	2.20391	2.05646	2.35136	0.955855	0.798579	1.11313	1.99422	1.83781	2.15063
125	0.941628	0.790784	1.09247	2.20083	2.05126	2.3504	0.976329	0.818045	1.13461	2.01381	1.85962	2.16799
126	0.947392	0.794841	1.09994	2.20959	2.05921	2.35997	1.01035	0.85211	1.16859	2.03032	1.87169	2.18895
127	0.972425	0.821515	1.12334	2.17614	2.02693	2.32536	0.97418	0.814487	1.13387	2.06977	1.90996	2.22957
128	0.94909	0.798765	1.09941	2.17745	2.02885	2.32605	0.992666	0.838048	1.14728	2.06196	1.90558	2.21835
129	0.929303	0.778223	1.08038	2.20891	2.06601	2.3518	0.985534	0.831969	1.1391	2.04047	1.88412	2.19682
130	0.978574	0.828243	1.12891	2.2091	2.06145	2.35676	1.017	0.858062	1.17593	2.07446	1.91802	2.2309
131	1.03168	0.878029	1.18533	2.19569	2.0467	2.34467	0.997327	0.840107	1.15455	2.10103	1.94064	2.26141
132	1.05581	0.89915	1.21248	2.20195	2.05065	2.35324	0.960249	0.803804	1.11669	2.10586	1.94649	2.26523
133	1.03819	0.883644	1.19273	2.21075	2.06058	2.36092	0.959961	0.804753	1.11517	2.1092	1.9507	2.26771
134	1.03737	0.879504	1.19523	2.20886	2.0583	2.35941	0.96942	0.813458	1.12538	2.12593	1.96825	2.28362
135	1.00424	0.845117	1.16335	2.1832	2.02798	2.33842	0.983435	0.824823	1.14205	2.12323	1.97057	2.27588
136	1.00016	0.84011	1.16021	2.24146	2.08806	2.39487	0.981123	0.820157	1.14209	2.08955	1.93041	2.24868
137	0.983225	0.82117	1.14528	2.24863	2.09492	2.40235	1.00727	0.84989	1.16466	2.0978	1.93356	2.26204
138	0.975493	0.816143	1.13484	2.28001	2.12707	2.43294	1.03553	0.880019	1.19104	2.11119	1.95031	2.27208
139	1.00471	0.843832	1.16559	2.2997	2.1474	2.45199	1.06544	0.904246	1.22663	2.09866	1.9384	2.25893
140	1.02145	0.861254	1.18164	2.27179	2.12088	2.4227	1.07303	0.909653	1.23641	2.16202	1.9972	2.32683
141	1.03006	0.869437	1.19069	2.25763	2.10349	2.41176	1.06696	0.907344	1.22658	2.13563	1.97018	2.30108
142	1.0219	0.863607	1.18019	2.27947	2.12656	2.43238	1.10283	0.942285	1.26338	2.12013	1.95387	2.28639
143	1.08571	0.931699	1.23973	2.25533	2.10251	2.40815	1.07782	0.914001	1.24163	2.11664	1.94922	2.28406
144	1.10884	0.953772	1.26391	2.24673	2.09331	2.40015	1.08763	0.926015	1.24924	2.13853	1.97355	2.30351
145	1.08369	0.925809	1.24157	2.27197	2.11728	2.42666	1.10026	0.937148	1.26337	2.12256	1.95778	2.28735
146	1.09301	0.934598	1.25143	2.29687	2.13837	2.45538	1.1234	0.963735	1.28306	2.07553	1.90925	2.2418
147	1.1094	0.954476	1.26432	2.28451	2.12493	2.44409	1.04973	0.89265	1.20681	2.11279	1.94632	2.27926
148	1.10838	0.948577	1.26818	2.29582	2.13763	2.45402	1.08933	0.930965	1.2477	2.12443	1.96008	2.28879
149	1.09373	0.930768	1.25669	2.23207	2.07684	2.3873	1.11014	0.945194	1.27509	2.13966	1.97492	2.3044
150	1.08005	0.919704	1.24039	2.26596	2.11575	2.41617	1.1843	1.01734	1.35126	2.11172	1.94519	2.27826
151	1.09798	0.932693	1.26327	2.29375	2.14758	2.43992	1.17786	1.00801	1.34771	2.11303	1.94746	2.27861
152	1.10421	0.945844	1.26257	2.29114	2.14531	2.43697	1.18732	1.02452	1.35012	2.14423	1.97823	2.31024
153	1.11735	0.958042	1.27665	2.29708	2.14871	2.44545	1.15244	0.987755	1.31712	2.13406	1.96656	2.30156
154	1.12761	0.964371	1.29084	2.25962	2.11016	2.40908	1.20098	1.04466	1.3573	2.14103	1.9701	2.31196
155	1.19248	1.02775	1.35722	2.29685	2.14674	2.44695	1.15907	1.00511	1.31302	2.12925	1.95766	2.30084
156	1.19899	1.03959	1.35838	2.29956	2.14741	2.45171	1.148	0.990138	1.30587	2.12629	1.95652	2.29605
157	1.19532	1.03576	1.35488	2.30198	2.15145	2.4525	1.1821	1.02156	1.34263	2.11079	1.94059	2.281
158	1.21284	1.05005	1.37564	2.33863	2.19063	2.48664	1.16453	1.00791	1.32114	2.1094	1.9386	2.2802
159	1.20087	1.03935	1.3624	2.35543	2.21211	2.49875	1.18327	1.03038	1.33617	2.12068	1.94427	2.2971
160	1.20152	1.04171	1.36132	2.33046	2.18405	2.47687	1.19709	1.03984	1.35434	2.14793	1.97458	2.32128
161	1.19528	1.03839	1.35217	2.3294	2.18317	2.47563	1.24343	1.07842	1.40843	2.12017	1.94588	2.29446
162	1.20224	1.04583	1.35865	2.36499	2.21554	2.51444	1.23281	1.07144	1.39419	2.12457	1.95232	2.29683
163	1.21322	1.0537	1.37275	2.33667	2.18588	2.48745	1.21549	1.05242	1.37857	2.11461	1.93975	2.28946
164	1.19681	1.03224	1.36138	2.34925	2.19844	2.50007	1.24041	1.07847	1.40234	2.13108	1.95347	2.30869
165	1.21184	1.04486	1.37882	2.3159	2.16214	2.46967	1.21883	1.06253	1.37513	2.12223	1.94978	2.29469
166	1.21069	1.04407	1.3773	2.32086	2.16688	2.47483	1.23713	1.08465	1.38962	2.13652	1.96322	2.30982
167	1.20522	1.03806	1.37237	2.34054	2.18937	2.49171	1.26757	1.10904	1.42609	2.15234	1.98046	2.32422
168	1.21293	1.0476	1.37826	2.33776	2.18706	2.48846	1.2631	1.09463	1.43157	2.14257	1.96652	2.31861
169	1.24587	1.0824	1.40935	2.32757	2.17868	2.47646	1.2472	1.08428	1.41012	2.1809	2.00146	2.36035
170	1.24482	1.07689	1.41276	2.32151	2.17009	2.47293	1.22467	1.05941	1.38993	2.19716	2.02087	2.37346
171	1.23549	1.0658	1.40518	2.33714	2.18575	2.48853	1.26031	1.10072	1.41991	2.18535	2.00929	2.36141
172	1.2556	1.08574	1.42547	2.36435	2.21062	2.51808	1.28583	1.12502	1.44664	2.16937	1.99447	2.34426
173	1.23006	1.05977	1.40036	2.3781	2.22496	2.53123	1.3044	1.13843	1.47036	2.15275	1.98172	2.32378
174	1.26183	1.09321	1.43046	2.37085	2.21658	2.52512	1.27611	1.10722	1.44499	2.15097	1.97932	2.32263
175	1.26098	1.09256	1.42939	2.34649	2.19217	2.50081	1.28902	1.11789	1.46015	2.17068	1.99357	2.34779
176	1.23539	1.06579	1.40499	2.37029	2.21848	2.52211	1.34549	1.17256	1.51841	2.18064	1.9927	2.36858
177	1.23197	1.06358	1.40037	2.38218	2.22978	2.53457	1.38564	1.20976	1.56151	2.20331	2.02429	2.38232
178	1.23299	1.06084	1.40513	2.40995	2.25442	2.56549	1.38635	1.21512	1.55758	2.19325	2.01865	2.36785
179	1.26448	1.09415	1.43482	2.39455	2.2391	2.55001	1.36956	1.20236	1.53677	2.21315	2.0414	2.38489
180	1.24226	1.07008	1.41445	2.37599	2.21976	2.53222	1.35072	1.17963	1.52181	2.25708	2.08561	2.42854
181	1.23701	1.06149	1.41254	2.40816	2.24956	2.56676	1.36053	1.19492	1.52614	2.26892	2.09706	2.44079
182	1.27104	1.09936	1.44272	2.43379	2.27401	2.59358	1.3359	1.17078	1.50102	2.22964	2.0554	2.40388
183	1.29772	1.128	1.46743	2.43505	2.27511	2.59498	1.3378	1.17742	1.49818	2.23944	2.06417	2.41472
184	1.29835	1.12603	1.47068	2.45059	2.29283	2.60835	1.3178	1.15193	1.48367	2.27434	2.09797	2.45071
185	1.2919	1.11736	1.46644	2.46256	2.30825	2.61686	1.3425	1.17432	1.51068	2.25109	2.07398	2.4282
186	1.28822	1.11194	1.4645	2.44492	2.28868	2.60115	1.38953	1.21581	1.56326	2.2756	2.09913	2.45207
187	1.31799	1.14291	1.49307	2.48213	2.32475	2.63951	1.40871	1.23857	1.57885	2.29147	2.1118	2.47113
188	1.30202	1.12405	1.47999	2.48456	2.32409	2.64502	1.37927	1.2151	1.54344	2.29627	2.11822	2.47432
189	1.29457	1.11885	1.4703	2.50851	2.34771	2.66932	1.40458	1.24154	1.56762	2.28862	2.1142	2.46305
190	1.31911	1.14419	1.49403	2.50764	2.34888	2.66641	1.40129	1.23055	1.57204	2.30152	2.1221	2.48094
191	1.3386	1.16648	1.51072	2.5059	2.34589	2.66592	1.38709	1.21897	1.55522	2.30545	2.12842	2.48248
192	1.3518	1.18005	1.52354	2.52099	2.36277	2.67921	1.36188	1.18619	1.53756	2.27934	2.10146	2.45722
193	1.36024	1.18101	1.53947	2.49332	2.33311	2.65353	1.42693	1.25411	1.59974	2.31803	2.1364	2.49966
194	1.38097	1.20259	1.55936	2.51826	2.35786	2.67866	1.50504	1.34191	1.66817	2.32907	2.15164	2.5065
195	1.4212	1.24426	1.59813	2.54173	2.38543	2.69802	1.46173	1.29597	1.62749	2.28014	2.10168	2.4586
196	1.43495	1.26228	1.60761	2.55367	2.39669	2.71064	1.43655	1.26963	1.60347	2.27443	2.09555	2.4533
197	1.42736	1.25419	1.60053	2.56826	2.40535	2.73117	1.44994	1.27952	1.62036	2.26205	2.07688	2.44722
198	1.41842	1.24129	1.59556	2.57296	2.4032	2.74273	1.42924	1.25888	1.5996	2.27832	2.09095	2.46568
199	1.42384	1.24802	1.59966	2.53501	2.37235	2.69766	1.45659	1.28411	1.62907	2.32564	2.14508	2.5062
200	1.44391	1.26621	1.62162	2.53545	2.37612	2.69477	1.50691	1.33794	1.67587	2.30254	2.12656	2.47851

## Sheet: Panel_B
time	hLeftEyePosControl_Mean	hLeftEyePosControl_95ci_low	hLeftEyePosControl_95ci_up	hLeftEyePosFull_Mean	hLeftEyePosFull_95ci_low	hLeftEyePosFull_95ci_up	hRightEyePosControl_Mean	hRightEyePosControl_95ci_low	hRightEyePosControl_95ci_up	hRightEyePosFull_Mean	hRightEyePosFull_95ci_low	hRightEyePosFull_95ci_up
-100	-0.0032584	-0.187362	0.180845	-0.00899158	-0.152347	0.134364	0.329449	0.180497	0.478401	0.247519	0.0977028	0.397335
-99	-0.046966	-0.215745	0.121813	0.0624488	-0.0891503	0.214048	0.342295	0.191339	0.493252	0.200579	0.0429527	0.358205
-98	-0.0226567	-0.188535	0.143222	0.047125	-0.109799	0.204049	0.267176	0.121654	0.412699	0.195512	0.0372912	0.353732
-97	-0.0179551	-0.185865	0.149955	-0.00624981	-0.143881	0.131381	0.305652	0.157359	0.453945	0.23069	0.0830262	0.378353
-96	-0.0343683	-0.201931	0.133194	0.00753118	-0.12946	0.144522	0.315873	0.164185	0.467561	0.232755	0.0795979	0.385912
-95	-0.0552698	-0.227679	0.11714	0.0339935	-0.102227	0.170214	0.317214	0.165222	0.469207	0.255085	0.10324	0.406929
-94	-0.0223103	-0.187467	0.142846	0.00436382	-0.132681	0.141408	0.278276	0.125995	0.430556	0.230881	0.0833379	0.378425
-93	0.0220528	-0.140049	0.184155	0.00659198	-0.126229	0.139413	0.230703	0.082166	0.379239	0.20509	0.0622986	0.347882
-92	0.0410532	-0.124106	0.206213	0.0849725	-0.0589451	0.22889	0.236392	0.0909182	0.381865	0.160897	0.0199397	0.301854
-91	-0.0179824	-0.190991	0.155026	0.0888357	-0.0538444	0.231516	0.241925	0.0945191	0.389332	0.189234	0.0419475	0.33652
-90	-0.00232476	-0.170187	0.165538	0.065503	-0.0641843	0.19519	0.207903	0.063522	0.352284	0.197693	0.0534549	0.341932
-89	0.00125102	-0.157712	0.160214	0.0340871	-0.0971085	0.165283	0.207607	0.0642685	0.350945	0.248797	0.107397	0.390197
-88	0.00800955	-0.141553	0.157572	0.00580629	-0.123529	0.135141	0.158879	0.0146403	0.303118	0.24314	0.105275	0.381005
-87	-0.0156603	-0.172965	0.141645	0.0361571	-0.101062	0.173377	0.183924	0.0380817	0.329766	0.200848	0.0575229	0.344174
-86	0.0195456	-0.139434	0.178525	0.042673	-0.0966521	0.181998	0.188903	0.0457397	0.332067	0.196238	0.0456734	0.346803
-85	0.0275396	-0.131075	0.186155	0.0887928	-0.0438841	0.22147	0.183021	0.0403933	0.325649	0.18998	0.0477489	0.332212
-84	0.00742977	-0.145624	0.160484	0.0765644	-0.0472158	0.200345	0.212158	0.0667859	0.35753	0.223261	0.0819431	0.364579
-83	0.0216803	-0.136995	0.180356	0.0663644	-0.0628533	0.195582	0.231608	0.0889791	0.374237	0.229587	0.0862055	0.372969
-82	-0.000808409	-0.157148	0.155531	0.0223601	-0.111266	0.155986	0.220527	0.0760368	0.365017	0.239819	0.098712	0.380925
-81	-0.0426955	-0.194452	0.10906	0.0347619	-0.0936985	0.163222	0.213013	0.0673597	0.358666	0.223714	0.0819066	0.365521
-80	-0.0197152	-0.169983	0.130552	0.0107456	-0.12292	0.144411	0.198231	0.0596353	0.336827	0.212959	0.0758295	0.350088
-79	0.0308818	-0.13159	0.193354	-0.0193978	-0.146025	0.107229	0.165041	0.0241622	0.30592	0.264222	0.138378	0.390065
-78	-0.0232698	-0.175134	0.128595	0.0249746	-0.108582	0.158531	0.222414	0.076848	0.36798	0.220111	0.0908755	0.349346
-77	-0.00367362	-0.153724	0.146377	0.00356613	-0.130737	0.137869	0.208059	0.0651064	0.351012	0.253233	0.121382	0.385083
-76	-0.0111224	-0.153758	0.131513	0.0185666	-0.112208	0.149341	0.25178	0.122556	0.381004	0.237567	0.110757	0.364378
-75	-0.00275523	-0.140638	0.135128	0.0342348	-0.0961436	0.164613	0.231112	0.0986892	0.363534	0.204531	0.0787349	0.330328
-74	-0.0111408	-0.152867	0.130585	0.0451961	-0.0832584	0.173651	0.213458	0.0827534	0.344162	0.23499	0.10228	0.367699
-73	-0.0472374	-0.194959	0.100484	0.0414846	-0.083107	0.166076	0.231884	0.094764	0.369003	0.291316	0.157805	0.424828
-72	-0.0181924	-0.175824	0.13944	0.0211072	-0.108881	0.151095	0.210272	0.0607566	0.359788	0.254705	0.115866	0.393544
-71	-0.047351	-0.210819	0.116117	-0.0037958	-0.127361	0.119769	0.217063	0.0688259	0.3653	0.285746	0.155779	0.415713
-70	0.00803263	-0.139371	0.155437	-0.0421205	-0.17294	0.0886993	0.20132	0.0581854	0.344454	0.267179	0.141293	0.393065
-69	0.0335514	-0.112143	0.179246	-0.0116421	-0.147731	0.124447	0.155229	0.00976793	0.30069	0.279223	0.144601	0.413844
-68	0.00191609	-0.145012	0.148844	-0.0354119	-0.174497	0.103674	0.146891	0.0131805	0.280602	0.257322	0.119268	0.395376
-67	0.0153202	-0.131124	0.161764	0.0121661	-0.126929	0.151261	0.154148	0.0191927	0.289103	0.215426	0.0745344	0.356317
-66	-0.00882032	-0.161005	0.143365	0.0111864	-0.115818	0.138191	0.111674	-0.0248419	0.248189	0.21596	0.0856701	0.346251
-65	-0.0333596	-0.175684	0.108965	0.0186559	-0.106008	0.14332	0.13294	0.00139162	0.264489	0.239609	0.106686	0.372533
-64	-0.0318537	-0.168035	0.104327	0.070212	-0.0466144	0.187038	0.136381	0.00869647	0.264066	0.189973	0.0581564	0.32179
-63	-0.0483236	-0.1919	0.0952525	0.0226634	-0.10129	0.146617	0.144129	0.0142872	0.273971	0.229481	0.103185	0.355778
-62	-0.0312819	-0.179813	0.11725	0.0279125	-0.103066	0.158891	0.0986249	-0.0332163	0.230466	0.205794	0.076556	0.335031
-61	-0.0125243	-0.162737	0.137688	0.00138471	-0.117266	0.120036	0.160869	0.0171769	0.304562	0.237747	0.113626	0.361869
-60	-0.0502457	-0.205566	0.105075	0.00973935	-0.0961525	0.115631	0.236932	0.0849859	0.388878	0.215575	0.0987028	0.332447
-59	-0.00311494	-0.148628	0.142398	-0.00432101	-0.111552	0.10291	0.220999	0.088982	0.353017	0.169498	0.0479011	0.291094
-58	-0.0430587	-0.195506	0.109389	0.0105213	-0.106932	0.127975	0.253344	0.118655	0.388033	0.156964	0.032528	0.281401
-57	-0.117427	-0.261324	0.0264705	-0.00721003	-0.127995	0.113575	0.30135	0.173888	0.428813	0.18234	0.0523684	0.312311
-56	-0.0713355	-0.205471	0.0627998	0.0693991	-0.0483334	0.187132	0.183106	0.0582865	0.307925	0.158831	0.030866	0.286797
-55	-0.0279241	-0.161472	0.105624	0.12824	0.00683079	0.249649	0.147439	0.0231484	0.27173	0.101415	-0.0258121	0.228641
-54	-0.000782916	-0.137343	0.135777	0.0701807	-0.0473064	0.187668	0.153485	0.0315498	0.275419	0.109603	-0.0152976	0.234504
-53	-0.0123317	-0.15549	0.130826	0.054723	-0.0501004	0.159546	0.175226	0.045193	0.305258	0.122585	-0.000816066	0.245985
-52	-0.053957	-0.197181	0.0892667	0.0208306	-0.0925105	0.134172	0.201401	0.0674384	0.335363	0.161216	0.0416066	0.280825
-51	-0.0458999	-0.188614	0.0968139	0.0626572	-0.0492009	0.174515	0.161855	0.0263603	0.29735	0.153445	0.0366769	0.270214
-50	-0.0209488	-0.15757	0.115672	0.0205804	-0.0925029	0.133664	0.0988087	-0.0302181	0.227836	0.150946	0.0333274	0.268565
-49	-0.00215826	-0.135016	0.1307	-0.0120407	-0.123503	0.0994212	0.0781797	-0.0403687	0.196728	0.178128	0.0537677	0.302488
-48	-0.00452413	-0.144683	0.135635	0.0557429	-0.0667174	0.178203	0.0912956	-0.0326004	0.215192	0.123331	0.00184866	0.244813
-47	-0.0822973	-0.226328	0.0617333	0.0511583	-0.073246	0.175563	0.113345	-0.0114726	0.238162	0.116	-0.00131602	0.233316
-46	-0.0704388	-0.206391	0.0655138	0.0617959	-0.0478531	0.171445	0.0936268	-0.0260198	0.213273	0.177102	0.059107	0.295097
-45	-0.112813	-0.255462	0.029836	0.0617896	-0.0390694	0.162649	0.136523	0.0107868	0.262259	0.168209	0.0535345	0.282883
-44	-0.0184052	-0.150722	0.113912	0.0580745	-0.0418753	0.158024	0.095277	-0.0259484	0.216502	0.117612	0.00529993	0.229925
-43	0.0781942	-0.0665868	0.222975	0.035316	-0.0716208	0.142253	0.0267563	-0.0976653	0.151178	0.113583	0.00305803	0.224108
-42	0.0171632	-0.119958	0.154284	0.0758335	-0.0504009	0.202068	0.0546049	-0.0636664	0.172876	0.0941208	-0.0267936	0.215035
-41	-0.0983231	-0.235012	0.0383662	0.0369694	-0.0770561	0.150995	0.110771	-0.0125586	0.234101	0.133563	0.0120146	0.255112
-40	-0.120609	-0.252068	0.01085	0.0265035	-0.0867544	0.139762	0.158644	0.0330514	0.284237	0.127421	0.00195976	0.252883
-39	-0.04074	-0.175023	0.093543	-0.0193815	-0.129921	0.0911581	0.119204	-0.00701862	0.245426	0.150166	0.025963	0.274369
-38	0.00237807	-0.139211	0.143967	0.0508909	-0.0553769	0.157159	0.0464361	-0.0724353	0.165308	0.0932332	-0.0208489	0.207315
-37	0.037361	-0.0964167	0.171139	0.0957542	-0.0101226	0.201631	0.047826	-0.0728392	0.168491	0.0528261	-0.0596059	0.165258
-36	-0.0121699	-0.146551	0.122211	0.110485	0.00102848	0.219941	0.066258	-0.0591706	0.191687	0.0698348	-0.0475655	0.187235
-35	-0.036168	-0.172285	0.0999488	0.109348	0.0069669	0.21173	0.130729	0.00698016	0.254479	0.0872997	-0.0225808	0.19718
-34	0.0112903	-0.1217	0.14428	0.071605	-0.0352426	0.178452	0.131271	0.0128037	0.249738	0.0840432	-0.0215882	0.189675
-33	0.0293624	-0.102074	0.160799	0.0964442	-0.00802638	0.200915	0.125956	0.00868221	0.24323	0.0214828	-0.0823351	0.125301
-32	0.0197583	-0.0954779	0.134994	0.103221	0.00836509	0.198077	0.0674239	-0.0538724	0.18872	0.0360128	-0.0659683	0.137994
-31	-0.0403848	-0.181952	0.101182	0.0593293	-0.0332878	0.151946	0.0680251	-0.0503516	0.186402	0.106418	-0.00387892	0.216716
-30	-0.0230199	-0.152847	0.106807	0.0289893	-0.0763865	0.134365	0.0561786	-0.0599266	0.172284	0.030575	-0.0818296	0.142979
-29	-0.00669906	-0.138215	0.124817	0.0399252	-0.0580945	0.137945	0.0182215	-0.0937328	0.130176	0.00540508	-0.106766	0.117577
-28	-0.0776604	-0.206115	0.0507942	0.0195989	-0.0724272	0.111625	0.10352	-0.00871992	0.21576	0.0721583	-0.0325496	0.176866
-27	-0.0623814	-0.192693	0.0679299	-0.00781512	-0.104529	0.0888987	0.108215	-0.00811769	0.224548	0.147443	0.0416779	0.253208
-26	-0.0479922	-0.177113	0.0811288	0.0569647	-0.0380517	0.151981	0.079307	-0.0439495	0.202564	0.0942554	-0.00819946	0.19671
-25	-0.04309	-0.170546	0.0843658	0.0486826	-0.0376725	0.135038	0.060424	-0.0529481	0.173796	0.0554457	-0.0384465	0.149338
-24	-0.0413371	-0.173051	0.0903766	-0.00336513	-0.0911989	0.0844686	0.0287266	-0.0840196	0.141473	0.0629943	-0.0344402	0.160429
-23	-0.0722343	-0.201008	0.0565398	0.0351089	-0.0625837	0.132801	0.0244493	-0.0789358	0.127834	0.0705246	-0.0316769	0.172726
-22	-0.0827207	-0.221167	0.0557254	0.0705698	-0.0300799	0.171219	0.011363	-0.105505	0.128231	0.0669219	-0.0333352	0.167179
-21	-0.0443409	-0.189727	0.101045	0.0276846	-0.0796721	0.135041	0.0604513	-0.0663353	0.187238	0.0826545	-0.0261769	0.191486
-20	0.0392035	-0.103328	0.181735	0.0190995	-0.0903867	0.128586	0.0387273	-0.0905689	0.168024	0.0502068	-0.0672559	0.16767
-19	-0.0192998	-0.157843	0.119244	0.0416421	-0.0715476	0.154832	0.0374492	-0.0840609	0.158959	0.0708496	-0.0382681	0.179967
-18	0.0178522	-0.116425	0.15213	0.0881211	-0.0127669	0.189009	0.0209846	-0.0897992	0.131768	0.057472	-0.0378821	0.152826
-17	-0.0284625	-0.161172	0.104247	0.0822803	-0.0205968	0.185157	0.00276296	-0.105857	0.111383	0.0320412	-0.0706016	0.134684
-16	-0.0314122	-0.151781	0.0889567	0.00812286	-0.107395	0.123641	0.0183143	-0.0890956	0.125724	0.0806583	-0.0311988	0.192515
-15	-0.0304439	-0.148206	0.0873184	0.00439827	-0.100333	0.10913	0.0401297	-0.0739705	0.15423	0.0509949	-0.0564819	0.158472
-14	0.000392712	-0.112346	0.113131	0.0350777	-0.0615101	0.131665	-0.000166826	-0.109248	0.108914	0.0524512	-0.0438515	0.148754
-13	0.0943806	-0.035948	0.224709	0.0575522	-0.0337374	0.148842	-0.00762543	-0.120967	0.105716	-0.0094837	-0.104099	0.085132
-12	0.0610158	-0.0697358	0.191768	-0.0323687	-0.136316	0.0715784	0.0419617	-0.0692509	0.153174	0.0390174	-0.0587835	0.136818
-11	-0.0450688	-0.158856	0.0687181	0.0671068	-0.0342524	0.168466	0.0561848	-0.0517553	0.164125	0.0178349	-0.0840454	0.119715
-10	-0.082519	-0.192341	0.0273035	0.128844	0.0257653	0.231923	0.0646761	-0.0460955	0.175448	-0.00196344	-0.10114	0.0972127
-9	-0.0508402	-0.171454	0.0697739	0.0631174	-0.0338785	0.160113	0.0144905	-0.100398	0.129379	0.00881794	-0.0857861	0.103422
-8	-0.0271393	-0.141371	0.0870929	0.0744632	-0.0235752	0.172502	-0.0229457	-0.133755	0.0878636	-0.0927701	-0.184368	-0.00117246
-7	-0.0542048	-0.167041	0.0586312	0.0445923	-0.0583811	0.147566	-0.0126171	-0.116984	0.0917494	-0.0623449	-0.155418	0.0307276
-6	-0.0415008	-0.156602	0.0736	0.0201721	-0.0873385	0.127683	-0.0295246	-0.130092	0.0710432	-0.0377729	-0.135894	0.0603479
-5	-0.0165218	-0.135571	0.102528	-0.0400469	-0.132391	0.0522975	-0.0569799	-0.15761	0.0436504	0.00360381	-0.0859587	0.0931663
-4	-0.0154996	-0.13021	0.0992104	-0.00578242	-0.10021	0.0886456	-0.0557883	-0.15656	0.0449839	-0.0215168	-0.112506	0.0694724
-3	-0.0157171	-0.127557	0.0961231	0.0330251	-0.0623397	0.12839	-0.0166785	-0.118044	0.0846866	-0.0488833	-0.140328	0.0425613
-2	-0.0316408	-0.140832	0.0775504	-0.0173331	-0.106731	0.0720644	0.0196888	-0.0747351	0.114113	-0.00267359	-0.0922442	0.086897
-1	-0.00799749	-0.0906316	0.0746367	-0.0208098	-0.0838269	0.0422073	0.00881116	-0.0626366	0.0802589	-0.00687356	-0.0692062	0.0554591
0	0	0	0	0	0	0	0	0	0	0	0	0
1	-0.0289005	-0.0981588	0.0403579	0.029114	-0.0306736	0.0889015	-0.0476698	-0.115301	0.019961	0.0170419	-0.0406212	0.0747049
2	-0.039821	-0.132906	0.0532641	-0.0147612	-0.0938717	0.0643493	-0.0393511	-0.13797	0.0592678	0.0467767	-0.0354685	0.129022
3	-0.0105328	-0.12647	0.105404	-0.0552192	-0.147547	0.0371081	-0.0783807	-0.182907	0.0261458	0.0537795	-0.0412466	0.148806
4	-0.041973	-0.149365	0.0654187	-0.044342	-0.147431	0.0587473	-0.0176419	-0.114727	0.0794436	0.0523965	-0.0438757	0.148669
5	0.00272199	-0.109699	0.115143	-0.0230308	-0.132975	0.0869134	-0.0548758	-0.151201	0.0414496	0.0341128	-0.0639154	0.132141
6	0.0174015	-0.0895003	0.124303	0.0229193	-0.0783879	0.124226	-0.0862659	-0.187441	0.0149091	0.030027	-0.0618832	0.121937
7	-0.0346353	-0.134476	0.0652057	0.0598481	-0.039321	0.159017	-0.0226734	-0.122886	0.0775388	-0.0104382	-0.108434	0.0875574
8	-0.0869163	-0.198744	0.0249116	0.0745825	-0.0198208	0.168986	0.0684704	-0.0421515	0.179092	-0.0567853	-0.150272	0.036701
9	-0.0881453	-0.211477	0.035186	0.0694548	-0.0323544	0.171264	0.0507223	-0.0664386	0.167883	-0.046767	-0.138429	0.0448948
10	-0.0708785	-0.196604	0.0548472	0.0599265	-0.045936	0.165789	-0.0477802	-0.172534	0.0769738	-0.0714826	-0.165089	0.0221241
11	-0.0888698	-0.207086	0.0293468	0.0103549	-0.0947436	0.115453	-0.0364202	-0.155769	0.0829283	-0.00881852	-0.101365	0.0837282
12	-0.0187409	-0.141588	0.104106	-0.0175902	-0.13349	0.0983099	-0.0159248	-0.136561	0.104711	0.0163289	-0.0883606	0.121018
13	0.0509361	-0.0632053	0.165078	0.0146155	-0.097851	0.127082	-0.0744766	-0.190359	0.0414061	-0.0141566	-0.121884	0.093571
14	0.0218353	-0.085561	0.129232	0.0581151	-0.058305	0.174535	-0.0601236	-0.170258	0.0500108	-0.0900644	-0.196452	0.0163232
15	-0.0149599	-0.128614	0.0986941	0.0185953	-0.0922494	0.12944	-0.0744202	-0.192999	0.0441585	-0.0789795	-0.178613	0.0206543
16	0.00250631	-0.112946	0.117959	-0.00177367	-0.108351	0.104803	-0.11721	-0.239864	0.00544447	-0.0630033	-0.165915	0.0399088
17	-0.0174399	-0.151998	0.117119	0.017215	-0.0800935	0.114523	-0.0870791	-0.206988	0.0328297	-0.0938462	-0.194662	0.00696944
18	-0.0558126	-0.177385	0.0657601	0.0379691	-0.0593974	0.135336	-0.0515989	-0.165808	0.06261	-0.0657827	-0.160016	0.0284504
19	-0.0824339	-0.209105	0.0442368	-0.00266904	-0.115487	0.110149	-0.00902055	-0.126481	0.10844	-0.0102252	-0.115986	0.0955355
20	-0.00155354	-0.133882	0.130775	-0.00758439	-0.134473	0.119305	0.0073806	-0.108259	0.12302	0.0406335	-0.0658745	0.147141
21	0.0320756	-0.10086	0.165012	0.0634802	-0.0524307	0.179391	-0.0407604	-0.155773	0.0742524	0.00740496	-0.0972538	0.112064
22	0.0541547	-0.0794357	0.187745	0.0291475	-0.0710849	0.12938	-0.0875858	-0.195044	0.0198729	-0.0162354	-0.115675	0.0832043
23	-0.00176555	-0.127703	0.124172	-0.016118	-0.116727	0.0844907	-0.0483803	-0.164194	0.0674338	-0.019897	-0.115105	0.0753108
24	-0.0356364	-0.161994	0.0907209	-0.00367584	-0.111957	0.104606	-0.0879367	-0.211709	0.0358357	-0.00486283	-0.10453	0.0948048
25	-0.0436028	-0.176746	0.0895406	0.0676523	-0.0372213	0.172526	-0.150033	-0.277102	-0.0229644	-0.0589425	-0.156655	0.0387702
26	-0.0331959	-0.162307	0.0959155	0.0798465	-0.0192484	0.178942	-0.123069	-0.246847	0.000709489	-0.119364	-0.214682	-0.0240469
27	-0.0343357	-0.155685	0.0870133	0.104431	0.00604508	0.202818	-0.0781913	-0.19235	0.0359669	-0.162572	-0.255198	-0.0699465
28	-0.0222361	-0.148861	0.104388	0.0918347	-0.0153286	0.198998	-0.074524	-0.191264	0.0422157	-0.108171	-0.205959	-0.0103835
29	0.00509722	-0.130961	0.141155	0.0811883	-0.0409961	0.203373	-0.0906499	-0.211253	0.0299537	-0.0880952	-0.192962	0.016772
30	0.0190542	-0.111347	0.149455	0.0898725	-0.031094	0.210839	-0.107721	-0.230826	0.0153833	-0.0721017	-0.17328	0.0290765
31	0.00971593	-0.112346	0.131778	0.0815123	-0.0340008	0.197025	-0.14288	-0.264607	-0.0211532	-0.0932338	-0.198394	0.0119267
32	0.0628669	-0.0742833	0.200017	0.0577161	-0.0539177	0.16935	-0.217901	-0.334791	-0.10101	-0.120564	-0.220593	-0.0205339
33	0.0297529	-0.106112	0.165618	0.00570044	-0.11174	0.123141	-0.184064	-0.305609	-0.0625185	-0.0840783	-0.181293	0.0131369
34	0.00856278	-0.135874	0.152999	0.00204498	-0.115096	0.119186	-0.148086	-0.27938	-0.0167922	-0.0653725	-0.167627	0.0368823
35	0.00486231	-0.124276	0.134001	-0.00251302	-0.112405	0.107379	-0.0721034	-0.197151	0.052944	-0.0658931	-0.168444	0.0366582
36	-0.0133984	-0.139912	0.113115	-0.000788205	-0.103689	0.102113	-0.0534586	-0.17718	0.0702631	-0.0858952	-0.186539	0.014749
37	-0.0177918	-0.143798	0.108214	0.0524142	-0.04449	0.149318	-0.109719	-0.232965	0.013527	-0.124554	-0.226651	-0.0224581
38	0.0334995	-0.0961625	0.163161	0.0245747	-0.0839114	0.133061	-0.0967227	-0.228723	0.0352779	-0.0466251	-0.153185	0.0599344
39	0.122272	-0.025535	0.270078	0.0709743	-0.0361193	0.178068	-0.100842	-0.226594	0.02491	-0.0858386	-0.18898	0.0173026
40	0.0535908	-0.0810833	0.188265	0.0283653	-0.0873111	0.144042	-0.0815457	-0.212181	0.0490893	-0.060609	-0.166141	0.0449235
41	0.0347492	-0.0945004	0.163999	0.0226953	-0.104748	0.150138	-0.0896111	-0.219415	0.0401926	-0.109642	-0.218549	-0.000733881
42	0.0399855	-0.091855	0.171826	0.0533404	-0.0689053	0.175586	-0.103186	-0.227293	0.0209208	-0.158016	-0.267552	-0.0484804
43	0.0269818	-0.103684	0.157648	0.0901088	-0.0186639	0.198882	-0.0821787	-0.209004	0.0446466	-0.149665	-0.25833	-0.0410002
44	0.0321495	-0.100218	0.164517	0.107932	-0.0122942	0.228158	-0.079105	-0.204708	0.0464984	-0.154678	-0.260375	-0.0489808
45	0.0450101	-0.0913709	0.181391	0.11244	-0.000613992	0.225494	-0.143739	-0.273906	-0.0135716	-0.135104	-0.236185	-0.0340235
46	0.019378	-0.115548	0.154304	0.0910895	-0.0185895	0.200768	-0.119674	-0.250066	0.0107175	-0.10419	-0.212759	0.00437832
47	-0.0186579	-0.149134	0.111818	0.0891611	-0.0208274	0.19915	-0.0812064	-0.207509	0.0450964	-0.146761	-0.259783	-0.0337383
48	0.0158502	-0.12159	0.153291	0.043279	-0.0648057	0.151364	-0.112504	-0.240374	0.0153651	-0.13358	-0.243505	-0.0236551
49	0.0571788	-0.0777629	0.19212	0.0161162	-0.103174	0.135406	-0.0869288	-0.207398	0.0335408	-0.136348	-0.251895	-0.0208002
50	0.0824283	-0.0559276	0.220784	0.0385801	-0.0854442	0.162604	-0.146084	-0.27179	-0.0203782	-0.206469	-0.322471	-0.090468
51	0.00353321	-0.130126	0.137193	0.0300109	-0.0764071	0.136429	-0.0869774	-0.213226	0.0392715	-0.183693	-0.291742	-0.075643
52	-0.0203701	-0.156039	0.115299	0.0954821	-0.0231728	0.214137	-0.112138	-0.241066	0.0167901	-0.186013	-0.294311	-0.0777152
53	0.0310515	-0.103592	0.165695	0.0569552	-0.0605131	0.174424	-0.118366	-0.244371	0.00763927	-0.116331	-0.229619	-0.00304298
54	-0.00513799	-0.148194	0.137918	0.0119512	-0.102706	0.126609	-0.103195	-0.235659	0.0292686	-0.116547	-0.224014	-0.00907909
55	0.0407368	-0.0991491	0.180623	0.0826847	-0.0331723	0.198542	-0.107402	-0.243052	0.0282492	-0.176204	-0.279839	-0.07257
56	0.0291454	-0.105109	0.163399	0.126069	0.0184422	0.233695	-0.132765	-0.259945	-0.00558513	-0.219169	-0.324433	-0.113906
57	0.0122233	-0.137673	0.16212	0.119066	0.00726085	0.230871	-0.118419	-0.250804	0.0139665	-0.218883	-0.328203	-0.109563
58	0.030463	-0.12029	0.181216	0.158294	0.0347835	0.281804	-0.125523	-0.257228	0.00618245	-0.254314	-0.365682	-0.142946
59	0.0388066	-0.1069	0.184513	0.201719	0.0779753	0.325462	-0.101361	-0.238542	0.0358199	-0.305626	-0.419901	-0.191352
60	0.00984455	-0.135511	0.1552	0.20923	0.0883692	0.330091	-0.0776947	-0.215634	0.0602449	-0.292677	-0.411157	-0.174198
61	0.0553927	-0.0973928	0.208178	0.205669	0.0834923	0.327846	-0.170061	-0.302763	-0.0373596	-0.253724	-0.377165	-0.130283
62	0.108751	-0.039971	0.257472	0.167068	0.0324315	0.301705	-0.228346	-0.365766	-0.0909259	-0.260843	-0.382335	-0.139351
63	0.0712029	-0.0767677	0.219174	0.168334	0.032041	0.304626	-0.165149	-0.295759	-0.0345389	-0.236365	-0.359701	-0.113029
64	0.0487062	-0.101434	0.198847	0.130328	-0.00492729	0.265584	-0.188379	-0.313052	-0.0637067	-0.17485	-0.298149	-0.0515517
65	0.0472094	-0.116355	0.210774	0.156957	0.0302872	0.283627	-0.223005	-0.361101	-0.0849098	-0.180855	-0.301299	-0.0604117
66	0.0201564	-0.137069	0.177382	0.159666	0.0445062	0.274825	-0.212214	-0.347528	-0.0768996	-0.205513	-0.319605	-0.0914216
67	0.0129721	-0.148001	0.173945	0.171454	0.049193	0.293716	-0.205284	-0.348669	-0.0618994	-0.228194	-0.347018	-0.109369
68	0.0761816	-0.0803993	0.232763	0.178328	0.0654009	0.291256	-0.210108	-0.354688	-0.0655271	-0.189167	-0.315433	-0.0629021
69	0.0799428	-0.0650021	0.224888	0.187555	0.0687494	0.306361	-0.188662	-0.329163	-0.0481614	-0.123086	-0.24488	-0.00129205
70	0.00997892	-0.141122	0.16108	0.147003	0.0261093	0.267897	-0.171106	-0.319368	-0.0228432	-0.14258	-0.258798	-0.0263616
71	-0.0397741	-0.189756	0.110208	0.160767	0.0356766	0.285858	-0.11657	-0.26871	0.0355693	-0.158027	-0.278357	-0.0376965
72	-0.0388063	-0.199866	0.122254	0.194845	0.0638977	0.325791	-0.202004	-0.364292	-0.0397164	-0.195189	-0.320519	-0.0698588
73	-0.0454702	-0.203163	0.112223	0.188052	0.0589298	0.317175	-0.184408	-0.338635	-0.0301805	-0.190653	-0.310791	-0.0705147
74	-0.029503	-0.179027	0.120021	0.197114	0.0680627	0.326166	-0.171512	-0.313998	-0.0290263	-0.202655	-0.319857	-0.0854538
75	0.0407258	-0.117466	0.198917	0.164919	0.034613	0.295225	-0.194197	-0.33547	-0.0529243	-0.179436	-0.296781	-0.06209
76	0.0451068	-0.117788	0.208001	0.168878	0.0401783	0.297578	-0.243344	-0.387048	-0.0996409	-0.169472	-0.288602	-0.0503419
77	0.00998468	-0.161613	0.181582	0.194268	0.0710139	0.317523	-0.282527	-0.433179	-0.131876	-0.141225	-0.263108	-0.0193411
78	-0.029185	-0.189982	0.131612	0.176689	0.0499876	0.303391	-0.224272	-0.37836	-0.0701845	-0.10749	-0.230955	0.0159743
79	-0.0384541	-0.192836	0.115928	0.184759	0.0619786	0.307539	-0.201663	-0.356479	-0.0468479	-0.122552	-0.250204	0.00509873
80	-0.0687794	-0.231455	0.0938961	0.159984	0.0294986	0.290469	-0.199889	-0.34763	-0.0521487	-0.157217	-0.286762	-0.0276714
81	0.0168492	-0.136465	0.170163	0.19005	0.0689831	0.311117	-0.220488	-0.365803	-0.075173	-0.159149	-0.278615	-0.039683
82	0.0372878	-0.121991	0.196567	0.235505	0.11571	0.355299	-0.318437	-0.466825	-0.17005	-0.146551	-0.259386	-0.033715
83	0.0292281	-0.129976	0.188432	0.213664	0.0920083	0.335319	-0.288871	-0.438045	-0.139697	-0.161669	-0.276392	-0.0469452
84	-0.0292347	-0.195492	0.137022	0.172945	0.0500581	0.295831	-0.210905	-0.371707	-0.0501026	-0.208162	-0.325795	-0.09053
85	-0.00144933	-0.166571	0.163673	0.188781	0.0627606	0.314802	-0.260384	-0.415271	-0.105497	-0.193285	-0.316935	-0.0696356
86	-0.00915271	-0.166841	0.148536	0.227022	0.0994797	0.354564	-0.311578	-0.459451	-0.163706	-0.193885	-0.317279	-0.0704909
87	0.0286039	-0.128961	0.186168	0.243726	0.116428	0.371023	-0.333837	-0.484783	-0.182891	-0.202891	-0.318883	-0.086899
88	0.0561229	-0.110102	0.222347	0.263143	0.130525	0.395761	-0.316954	-0.473062	-0.160846	-0.247728	-0.364153	-0.131302
89	-0.00422451	-0.165641	0.157192	0.282997	0.141932	0.424061	-0.31997	-0.474803	-0.165138	-0.300115	-0.424622	-0.175609
90	-0.0724451	-0.242618	0.0977279	0.207169	0.0681315	0.346206	-0.21698	-0.373495	-0.0604644	-0.274293	-0.403108	-0.145479
91	-0.0730083	-0.248064	0.102047	0.148018	-0.0010191	0.297056	-0.215723	-0.373717	-0.0577281	-0.208578	-0.337932	-0.0792244
92	0.0261608	-0.144167	0.196489	0.168673	0.0237684	0.313577	-0.285885	-0.438696	-0.133073	-0.186421	-0.314287	-0.0585549
93	0.01858	-0.14572	0.18288	0.17855	0.0480797	0.309019	-0.245307	-0.400379	-0.0902348	-0.192582	-0.315901	-0.0692637
94	0.0539268	-0.113414	0.221267	0.205699	0.0781655	0.333233	-0.342098	-0.492513	-0.191682	-0.201248	-0.32182	-0.0806755
95	0.0957829	-0.0711305	0.262696	0.244737	0.108405	0.381069	-0.342276	-0.491343	-0.193209	-0.224617	-0.346493	-0.102741
96	0.0503927	-0.109457	0.210242	0.246292	0.105368	0.387216	-0.263718	-0.414348	-0.113088	-0.248704	-0.374415	-0.122992
97	0.0402622	-0.116887	0.197411	0.242916	0.0981226	0.387709	-0.272973	-0.423146	-0.1228	-0.218978	-0.342598	-0.0953581
98	0.00603627	-0.161361	0.173434	0.196295	0.0554235	0.337166	-0.301127	-0.450054	-0.152199	-0.199131	-0.324376	-0.0738859
99	-0.052567	-0.225976	0.120842	0.19188	0.0572606	0.326499	-0.277755	-0.429048	-0.126462	-0.20211	-0.330427	-0.0737921
100	-0.0987863	-0.267473	0.0699008	0.123259	-0.00838661	0.254904	-0.208249	-0.361417	-0.0550814	-0.148537	-0.28516	-0.0119139
101	-0.0856599	-0.248912	0.0775921	0.112379	-0.0249315	0.249689	-0.228111	-0.382577	-0.0736448	-0.148037	-0.286262	-0.00981179
102	-0.026972	-0.182889	0.128945	0.151457	0.00881342	0.2941	-0.273793	-0.424066	-0.12352	-0.233808	-0.366205	-0.101411
103	-0.0144566	-0.173777	0.144864	0.178671	0.0323537	0.324988	-0.229385	-0.382572	-0.0761969	-0.237447	-0.367852	-0.107041
104	0.0139643	-0.154028	0.181957	0.132476	-0.0236719	0.288624	-0.245189	-0.40317	-0.0872073	-0.213305	-0.356505	-0.0701052
105	0.021216	-0.143093	0.185525	0.143929	-0.00327131	0.291129	-0.275377	-0.431015	-0.119738	-0.208312	-0.350967	-0.0656574
106	0.045948	-0.110027	0.201923	0.158852	0.00791771	0.309786	-0.324789	-0.478176	-0.171402	-0.204574	-0.344182	-0.0649656
107	0.00911287	-0.144649	0.162875	0.144403	9.42536e-05	0.288712	-0.357185	-0.502631	-0.211738	-0.20303	-0.336444	-0.0696159
108	-0.00649972	-0.168538	0.155538	0.108412	-0.0342373	0.251061	-0.295814	-0.455692	-0.135936	-0.178489	-0.308337	-0.0486412
109	-0.0349269	-0.210762	0.140909	0.0772727	-0.0650921	0.219638	-0.269112	-0.428282	-0.109942	-0.161088	-0.291881	-0.0302951
110	-0.0374431	-0.215001	0.140114	0.0983786	-0.0413177	0.238075	-0.30325	-0.462524	-0.143977	-0.1451	-0.267833	-0.0223674
111	0.0163097	-0.157003	0.189622	0.10671	-0.0341645	0.247584	-0.334701	-0.498059	-0.171343	-0.169193	-0.305213	-0.0331736
112	2.87822e-05	-0.177069	0.177126	0.0757604	-0.069121	0.220642	-0.315518	-0.484288	-0.146747	-0.173876	-0.315016	-0.0327361
113	0.0130372	-0.159444	0.185518	0.0866839	-0.0624178	0.235786	-0.3553	-0.524579	-0.186022	-0.245948	-0.3867	-0.105195
114	-0.0329708	-0.193936	0.127995	0.110247	-0.0439159	0.26441	-0.309124	-0.474154	-0.144094	-0.262414	-0.403831	-0.120996
115	-0.0613468	-0.227997	0.105304	0.110514	-0.0385089	0.259536	-0.295734	-0.45934	-0.132129	-0.223443	-0.36084	-0.0860449
116	-0.0354887	-0.204264	0.133287	0.04665	-0.0963604	0.18966	-0.316965	-0.486622	-0.147308	-0.160627	-0.291988	-0.0292669
117	-0.0349533	-0.209202	0.139295	0.00136548	-0.145337	0.148068	-0.348073	-0.520971	-0.175174	-0.130042	-0.267954	0.00787057
118	-0.0403329	-0.224028	0.143362	-0.00052628	-0.140742	0.13969	-0.356341	-0.53479	-0.177892	-0.153734	-0.296222	-0.0112449
119	-0.0593221	-0.240642	0.121998	-0.0349245	-0.183208	0.113359	-0.361742	-0.539446	-0.184038	-0.102034	-0.248017	0.0439502
120	-0.0199606	-0.187268	0.147347	-0.057928	-0.203648	0.0877917	-0.371748	-0.541951	-0.201545	-0.106701	-0.244315	0.0309135
121	0.000514876	-0.159925	0.160955	0.000194475	-0.146915	0.147304	-0.375167	-0.537111	-0.213224	-0.171142	-0.307921	-0.0343633
122	-0.00918786	-0.175053	0.156677	-0.0143793	-0.162968	0.13421	-0.331592	-0.493763	-0.169421	-0.134453	-0.270406	0.00149989
123	-0.0786375	-0.253333	0.0960575	0.0341426	-0.114202	0.182487	-0.286247	-0.445879	-0.126615	-0.176868	-0.321972	-0.0317634
124	-0.0898119	-0.265398	0.0857742	0.00250534	-0.146977	0.151988	-0.266549	-0.428954	-0.104144	-0.161461	-0.307762	-0.0151602
125	-0.0357067	-0.212024	0.140611	0.0578573	-0.099035	0.21475	-0.366582	-0.530919	-0.202245	-0.200521	-0.350975	-0.0500674
126	-0.00668008	-0.175877	0.162517	0.0793207	-0.0708737	0.229515	-0.350024	-0.508261	-0.191787	-0.197661	-0.33989	-0.0554329
127	0.0327665	-0.139478	0.205011	0.0558668	-0.101208	0.212941	-0.365034	-0.522905	-0.207162	-0.184307	-0.332123	-0.0364913
128	0.0308698	-0.151264	0.213004	-0.000408641	-0.152421	0.151604	-0.43238	-0.602044	-0.262717	-0.14626	-0.295603	0.00308184
129	-0.0370047	-0.233415	0.159405	-0.0407992	-0.195738	0.11414	-0.375879	-0.547753	-0.204005	-0.118617	-0.267209	0.0299764
130	-0.0173684	-0.215445	0.180709	-0.00871258	-0.156781	0.139356	-0.336546	-0.515052	-0.158039	-0.130423	-0.274623	0.0137767
131	0.0145288	-0.176667	0.205725	-0.0574349	-0.20096	0.08609	-0.362996	-0.535921	-0.190071	-0.16042	-0.308178	-0.012661
132	-0.0169419	-0.207968	0.174085	-0.0773035	-0.22902	0.0744129	-0.335477	-0.512282	-0.158672	-0.158695	-0.30924	-0.00815033
133	-0.0678	-0.255436	0.119836	-0.0686171	-0.21258	0.075346	-0.39529	-0.572283	-0.218298	-0.162723	-0.306887	-0.0185584
134	-0.057924	-0.228632	0.112784	-0.112386	-0.268836	0.0440635	-0.408204	-0.578729	-0.237678	-0.14664	-0.288755	-0.00452506
135	-0.0474047	-0.224583	0.129774	-0.0799462	-0.234481	0.0745884	-0.403783	-0.574572	-0.232993	-0.231873	-0.373912	-0.0898337
136	-0.0359026	-0.209251	0.137445	-0.0319561	-0.191717	0.127805	-0.389387	-0.563942	-0.214832	-0.300497	-0.448348	-0.152646
137	-0.00794604	-0.179885	0.163993	-0.03608	-0.18528	0.11312	-0.417252	-0.583653	-0.250851	-0.304474	-0.457725	-0.151222
138	0.0521055	-0.124203	0.228414	-0.0338135	-0.18057	0.112943	-0.362214	-0.531255	-0.193172	-0.260372	-0.406079	-0.114664
139	0.0175271	-0.162959	0.198013	-0.0297804	-0.179154	0.119593	-0.349576	-0.512499	-0.186653	-0.266846	-0.410251	-0.12344
140	-0.0198604	-0.190839	0.151119	-0.0382227	-0.184392	0.107946	-0.336194	-0.504392	-0.167995	-0.29197	-0.436766	-0.147175
141	-0.0258304	-0.196001	0.14434	-0.0637382	-0.210817	0.0833404	-0.36872	-0.540077	-0.197364	-0.259703	-0.403793	-0.115614
142	0.039107	-0.141591	0.219805	-0.0570946	-0.210443	0.0962536	-0.406431	-0.585451	-0.227412	-0.258499	-0.402694	-0.114305
143	-0.0353109	-0.217353	0.146732	-0.0833618	-0.233675	0.0669514	-0.386962	-0.567609	-0.206315	-0.252724	-0.393795	-0.111654
144	-0.012115	-0.185102	0.160872	-0.0873927	-0.237173	0.062388	-0.411317	-0.586063	-0.236571	-0.245147	-0.389426	-0.100867
145	0.0263013	-0.147773	0.200376	-0.0951448	-0.248568	0.0582783	-0.429242	-0.600998	-0.257486	-0.31611	-0.459541	-0.172679
146	0.0477044	-0.127706	0.223115	-0.0851706	-0.234355	0.0640137	-0.379582	-0.556801	-0.202363	-0.282105	-0.428788	-0.135421
147	0.0272045	-0.146691	0.2011	-0.142121	-0.298856	0.0146139	-0.41732	-0.592978	-0.241661	-0.21547	-0.372899	-0.0580416
148	0.0582648	-0.122989	0.239519	-0.138612	-0.295639	0.0184154	-0.39293	-0.57245	-0.21341	-0.225261	-0.383676	-0.0668472
149	0.0382354	-0.151379	0.22785	-0.0980274	-0.2563	0.0602448	-0.425025	-0.609626	-0.240425	-0.240702	-0.394323	-0.0870814
150	0.033159	-0.164008	0.230326	-0.0962108	-0.248123	0.0557017	-0.443323	-0.636733	-0.249914	-0.229044	-0.384132	-0.0739559
151	0.0185719	-0.171999	0.209143	-0.0968528	-0.250321	0.0566158	-0.425528	-0.614617	-0.236438	-0.251489	-0.405758	-0.097219
152	-0.0275373	-0.23078	0.175706	-0.117886	-0.271419	0.0356465	-0.381578	-0.576043	-0.187112	-0.22835	-0.392534	-0.0641663
153	0.000153532	-0.186987	0.187294	-0.126707	-0.28169	0.0282768	-0.394064	-0.580223	-0.207906	-0.221005	-0.382887	-0.0591232
154	0.0675353	-0.114039	0.249109	-0.122942	-0.272775	0.0268906	-0.425889	-0.606424	-0.245354	-0.275387	-0.43689	-0.113884
155	0.00773076	-0.177116	0.192577	-0.158679	-0.311334	-0.00602407	-0.419288	-0.598832	-0.239745	-0.24119	-0.396781	-0.0855993
156	-0.0440558	-0.226557	0.138445	-0.134751	-0.288204	0.018702	-0.400093	-0.576061	-0.224125	-0.255339	-0.412664	-0.0980132
157	-0.0294312	-0.217296	0.158434	-0.165849	-0.318939	-0.0127581	-0.461045	-0.645314	-0.276777	-0.321741	-0.47463	-0.168853
158	-0.00904342	-0.196935	0.178848	-0.0817074	-0.24128	0.077865	-0.425004	-0.604456	-0.245552	-0.342597	-0.509549	-0.175646
159	-0.0532423	-0.241605	0.13512	-0.0503255	-0.204433	0.103782	-0.377624	-0.560259	-0.194989	-0.325784	-0.491967	-0.159601
160	-0.0314744	-0.233055	0.170106	-0.0810058	-0.228106	0.0660945	-0.422956	-0.613755	-0.232157	-0.298153	-0.461926	-0.13438
161	-0.00735886	-0.205738	0.19102	-0.0897394	-0.243996	0.0645171	-0.466426	-0.659286	-0.273565	-0.319288	-0.47304	-0.165535
162	-0.0208476	-0.211631	0.169935	-0.142598	-0.310782	0.0255871	-0.487636	-0.676546	-0.298726	-0.25566	-0.406926	-0.104394
163	-0.10098	-0.286615	0.0846549	-0.171945	-0.341366	-0.00252442	-0.399396	-0.588282	-0.21051	-0.258651	-0.416016	-0.101285
164	-0.101484	-0.283109	0.0801417	-0.130912	-0.295222	0.033398	-0.347632	-0.540539	-0.154725	-0.289613	-0.450005	-0.12922
165	-0.0218665	-0.205291	0.161558	-0.101353	-0.263878	0.0611723	-0.35811	-0.554792	-0.161427	-0.322924	-0.477917	-0.167932
166	-0.0249052	-0.204634	0.154824	-0.150385	-0.309433	0.00866289	-0.463149	-0.652149	-0.274148	-0.297082	-0.451793	-0.14237
167	-0.0538566	-0.239979	0.132266	-0.162393	-0.3218	-0.00298648	-0.471926	-0.664792	-0.279061	-0.275065	-0.430008	-0.120122
168	-0.0583602	-0.245931	0.12921	-0.135815	-0.304988	0.0333586	-0.451037	-0.647493	-0.254581	-0.270828	-0.426073	-0.115582
169	-0.0207617	-0.210258	0.168734	-0.109481	-0.27342	0.0544577	-0.432135	-0.613507	-0.250764	-0.29017	-0.449362	-0.130978
170	-0.0190291	-0.215025	0.176967	-0.10328	-0.264439	0.057878	-0.415403	-0.590558	-0.240247	-0.317274	-0.474111	-0.160437
171	-0.0264639	-0.220005	0.167078	-0.0843003	-0.2465	0.0778992	-0.404263	-0.584478	-0.224047	-0.338624	-0.493069	-0.184179
172	-0.0293463	-0.230149	0.171456	-0.12941	-0.297036	0.038215	-0.388704	-0.581386	-0.196021	-0.286422	-0.441999	-0.130844
173	-0.0966931	-0.287268	0.0938821	-0.135592	-0.305285	0.0341007	-0.323652	-0.516816	-0.130487	-0.264306	-0.421618	-0.106995
174	-0.107976	-0.30095	0.0849976	-0.124042	-0.286697	0.0386129	-0.407484	-0.602297	-0.21267	-0.286676	-0.451582	-0.121769
175	-0.0905564	-0.289596	0.108483	-0.0879653	-0.249887	0.073956	-0.455405	-0.641545	-0.269264	-0.313238	-0.476894	-0.149583
176	-0.0615239	-0.258196	0.135148	-0.088682	-0.24985	0.0724855	-0.507037	-0.688775	-0.3253	-0.311694	-0.470867	-0.152521
177	-0.000405382	-0.195075	0.194264	-0.111288	-0.281683	0.0591082	-0.492785	-0.679808	-0.305762	-0.352537	-0.509789	-0.195285
178	0.0656035	-0.130252	0.26146	-0.144295	-0.320697	0.0321069	-0.468839	-0.647261	-0.290417	-0.329105	-0.486506	-0.171703
179	0.051869	-0.146467	0.250205	-0.120319	-0.287472	0.0468334	-0.459342	-0.636538	-0.282146	-0.387585	-0.546062	-0.229107
180	-0.0315074	-0.227373	0.164358	-0.0949399	-0.263904	0.0740241	-0.466127	-0.645987	-0.286267	-0.389645	-0.550003	-0.229286
181	-0.117293	-0.32838	0.0937946	-0.0723539	-0.244013	0.0993056	-0.358429	-0.54964	-0.167218	-0.336542	-0.502969	-0.170114
182	-0.0542285	-0.256583	0.148125	-0.0936488	-0.267087	0.0797895	-0.415131	-0.603387	-0.226874	-0.330516	-0.499219	-0.161813
183	0.0225759	-0.176553	0.221705	-0.102598	-0.274231	0.0690352	-0.528071	-0.714426	-0.341716	-0.352896	-0.519377	-0.186415
184	-0.019354	-0.220423	0.181715	-0.0854145	-0.252469	0.0816397	-0.516438	-0.705031	-0.327844	-0.316779	-0.48876	-0.144798
185	-0.0555696	-0.24985	0.138711	-0.0591849	-0.224699	0.106329	-0.433659	-0.613408	-0.253909	-0.309875	-0.476809	-0.14294
186	-0.0343172	-0.234521	0.165887	-0.0314238	-0.200645	0.137797	-0.461972	-0.647614	-0.276329	-0.35761	-0.527178	-0.188043
187	0.0471301	-0.15946	0.25372	-0.00896125	-0.181268	0.163346	-0.500085	-0.690888	-0.309282	-0.387549	-0.555465	-0.219632
188	0.0328709	-0.173535	0.239277	-0.0382044	-0.210493	0.134084	-0.494406	-0.687063	-0.301749	-0.387787	-0.557112	-0.218461
189	0.00113179	-0.220965	0.223229	-0.03304	-0.201106	0.135026	-0.48179	-0.675829	-0.287751	-0.382539	-0.545988	-0.21909
190	-0.0531362	-0.280152	0.173879	-0.0314241	-0.201126	0.138278	-0.437741	-0.639214	-0.236268	-0.35253	-0.510362	-0.194697
191	-0.0633403	-0.275203	0.148523	-0.0428439	-0.216377	0.13069	-0.425183	-0.621018	-0.229348	-0.356041	-0.522561	-0.189522
192	-0.0703548	-0.276873	0.136164	-0.0671984	-0.246774	0.112377	-0.471133	-0.669574	-0.272692	-0.351922	-0.52125	-0.182594
193	-0.0468115	-0.248479	0.154856	-0.0453769	-0.216962	0.126208	-0.488875	-0.687584	-0.290167	-0.390673	-0.56884	-0.212506
194	-0.00932763	-0.202307	0.183651	-0.0438133	-0.21567	0.128043	-0.4705	-0.674934	-0.266067	-0.400463	-0.574137	-0.226789
195	0.0061581	-0.183316	0.195632	-0.0421464	-0.214112	0.129819	-0.469658	-0.675931	-0.263384	-0.389736	-0.562333	-0.21714
196	-0.0213041	-0.222241	0.179633	0.00751554	-0.162218	0.177249	-0.465917	-0.666863	-0.264971	-0.390703	-0.564231	-0.217175
197	-0.0279814	-0.225452	0.169489	-0.00421094	-0.179248	0.170826	-0.471309	-0.668785	-0.273834	-0.367003	-0.547258	-0.186747
198	-0.03358	-0.232114	0.164954	-0.0177888	-0.194709	0.159131	-0.526992	-0.727193	-0.326791	-0.373624	-0.550322	-0.196926
199	-0.051117	-0.257698	0.155464	-0.0280894	-0.204263	0.148085	-0.46615	-0.667436	-0.264863	-0.364991	-0.531909	-0.198072
200	-0.030484	-0.246081	0.185113	-0.024427	-0.192866	0.144012	-0.474964	-0.681903	-0.268025	-0.366846	-0.530749	-0.202943

## Sheet: Panel_C
time	vRightEyeVelControl_Mean	vRightEyeVelControl_95ci_low	vRightEyeVelControl_95ci_up	vLeftEyeVelControl_Mean	vLeftEyeVelControl_95ci_low	vLeftEyeVelControl_95ci_up	vRightEyeVelFull_Mean	vRightEyeVelFull_95ci_low	vRightEyeVelFull_95ci_up	vLeftEyeVelFull_Mean	vLeftEyeVelFull_95ci_low	vLeftEyeVelFull_95ci_up
-100	5.68405	-1.41985	12.7879	6.72495	-0.352663	13.8026	9.31104	2.65644	15.9656	6.72859	0.745472	12.7117
-99	6.12144	-0.978276	13.2212	7.03811	-0.174295	14.2505	10.3951	3.81945	16.9708	7.00801	1.09976	12.9163
-98	6.55251	-0.613391	13.7184	7.68338	0.205599	15.1612	11.0477	4.54209	17.5534	7.17654	1.22787	13.1252
-97	7.02717	-0.1935	14.2478	8.4244	0.677717	16.1711	11.1527	4.62928	17.6762	7.36114	1.2188	13.5035
-96	7.37384	0.146967	14.6007	9.19677	1.28384	17.1097	10.6786	4.06193	17.2953	7.59575	1.19955	13.992
-95	7.41124	0.208261	14.6142	9.83523	1.96095	17.7095	9.94754	3.24369	16.6514	7.78276	1.20583	14.3597
-94	7.09265	-0.0475882	14.2329	10.0949	2.46896	17.7209	8.87029	2.17319	15.5674	8.12028	1.51237	14.7282
-93	6.43654	-0.630613	13.5037	9.92799	2.69203	17.1639	7.68198	1.1114	14.2526	8.49045	2.01441	14.9665
-92	5.35168	-1.62213	12.3255	9.4816	2.64445	16.3187	6.61903	0.233676	13.0044	8.9404	2.69195	15.1888
-91	4.23119	-2.66041	11.1228	8.57964	1.98704	15.1722	5.85428	-0.41266	12.1212	9.4597	3.40196	15.5174
-90	3.37201	-3.42558	10.1696	7.4574	0.841716	14.0731	5.51665	-0.797859	11.8312	9.79602	3.82823	15.7638
-89	2.70601	-4.01475	9.42677	6.41347	-0.478636	13.3056	5.6196	-0.911209	12.1504	9.9905	4.00094	15.9801
-88	2.50597	-4.18221	9.19414	5.54233	-1.74727	12.8319	6.17241	-0.647925	12.9927	9.8955	3.83953	15.9515
-87	2.77053	-3.96854	9.5096	5.01926	-2.63459	12.6731	6.97447	-0.1048	14.0537	9.61825	3.5629	15.6736
-86	3.68848	-3.18685	10.5638	4.86786	-3.063	12.7987	7.79701	0.558068	15.036	9.17854	3.20335	15.1537
-85	5.14461	-1.88641	12.1756	5.03925	-3.01329	13.0918	8.47272	1.1891	15.7563	8.64925	2.79354	14.505
-84	7.01613	-0.182232	14.2145	5.39637	-2.63367	13.4264	8.92065	1.70955	16.1317	8.06906	2.31521	13.8229
-83	8.82191	1.51399	16.1298	5.76039	-2.14016	13.6609	9.02453	2.02592	16.0231	7.57557	1.83998	13.3112
-82	10.6907	3.38921	17.9922	5.74688	-1.92341	13.4172	8.45804	1.77634	15.1397	7.30788	1.50484	13.1109
-81	12.0718	4.83536	19.3082	5.56741	-1.8057	12.9405	7.47702	1.10391	13.8501	7.07651	1.17404	12.979
-80	13.0723	5.87958	20.2651	5.31882	-1.75622	12.3939	6.03089	-0.144705	12.2065	7.08966	1.09884	13.0805
-79	13.4324	6.21849	20.6463	5.04836	-1.79958	11.8963	4.53356	-1.60076	10.6679	7.09765	1.0784	13.1169
-78	13.2286	5.87952	20.5777	5.02586	-1.71948	11.7712	2.99902	-3.26532	9.26335	7.11207	1.08548	13.1387
-77	12.6354	5.08783	20.183	5.36848	-1.37519	12.1122	1.86907	-4.6043	8.34243	7.06563	1.03722	13.0941
-76	11.69	3.92749	19.4526	6.27462	-0.507664	13.0569	1.08195	-5.57684	7.74074	7.10445	1.06721	13.1417
-75	10.8744	2.96414	18.7847	7.59483	0.801302	14.3884	0.94794	-5.83949	7.73537	7.17448	1.12687	13.2221
-74	10.0901	2.1165	18.0636	9.40623	2.69528	16.1172	1.24917	-5.58994	8.08827	7.33645	1.27653	13.3964
-73	9.40818	1.4943	17.3221	11.4315	4.90147	17.9616	2.16473	-4.71491	9.04436	7.66418	1.57814	13.7502
-72	9.07842	1.33524	16.8216	13.2491	6.93911	19.5592	3.61715	-3.2924	10.5267	8.07727	1.97655	14.178
-71	8.99251	1.52966	16.4554	14.6058	8.44773	20.764	5.58856	-1.32031	12.4974	8.45757	2.36386	14.5513
-70	9.19446	2.0661	16.3228	15.3765	9.19613	21.5568	7.59465	0.727333	14.462	8.77494	2.7887	14.7612
-69	9.36968	2.55252	16.1868	15.3937	8.99788	21.7895	9.61753	2.82598	16.4091	8.84457	3.10693	14.5822
-68	9.50143	2.86477	16.1381	14.8665	8.14752	21.5854	11.3391	4.63647	18.0416	8.80622	3.37093	14.2415
-67	9.68197	3.03124	16.3327	13.8812	6.86822	20.8943	12.6219	5.99467	19.2491	8.63477	3.45365	13.8159
-66	9.85893	3.03161	16.6862	12.7124	5.5378	19.8871	13.3929	6.79946	19.9863	8.45141	3.35772	13.5451
-65	9.82144	2.75582	16.8871	11.5164	4.32223	18.7106	13.6361	7.05157	20.2207	8.26687	3.03427	13.4995
-64	9.66416	2.45453	16.8738	10.6189	3.49014	17.7476	13.2777	6.69188	19.8636	8.31672	2.7902	13.8432
-63	9.43564	2.22352	16.6478	10.1773	3.12554	17.2291	12.4295	5.84354	19.0154	8.86857	3.00368	14.7335
-62	9.04265	1.92651	16.1588	10.0919	3.05841	17.1255	11.2523	4.63684	17.8678	9.85677	3.67326	16.0403
-61	8.55127	1.52726	15.5753	10.3005	3.20562	17.3953	9.92685	3.23625	16.6175	11.1452	4.71435	17.5761
-60	7.98221	0.968499	14.9959	10.6485	3.46836	17.8286	8.62367	1.80167	15.4457	12.5689	5.9594	19.1784
-59	7.33006	0.236176	14.4239	10.9785	3.72218	18.2348	7.47278	0.532041	14.4135	13.7882	7.10875	20.4676
-58	6.67535	-0.555715	13.9064	11.1029	3.82302	18.3829	6.55172	-0.404811	13.5082	14.5487	7.95007	21.1474
-57	6.175	-1.17663	13.5266	10.8696	3.59156	18.1476	6.08504	-0.777268	12.9473	14.623	8.26635	20.9797
-56	5.92662	-1.48869	13.3419	10.3323	3.10188	17.5626	5.89115	-0.833083	12.6154	13.8565	7.81923	19.8937
-55	5.9344	-1.47865	13.3474	9.4284	2.29055	16.5662	6.06774	-0.564967	12.7004	12.3459	6.55992	18.1319
-54	6.07236	-1.28678	13.4315	8.43269	1.38251	15.4829	6.53876	-0.131078	13.2086	10.2133	4.46942	15.9572
-53	6.58865	-0.669394	13.8467	7.30055	0.298792	14.3023	7.12051	0.295943	13.9451	7.90021	1.92576	13.8747
-52	7.32416	0.219964	14.4284	6.30639	-0.695381	13.3082	7.66976	0.650306	14.6892	5.70462	-0.644731	12.054
-51	8.02576	1.10384	14.9477	5.72874	-1.31851	12.776	7.95732	0.840982	15.0737	4.04858	-2.62254	10.7197
-50	8.63312	1.86147	15.4048	5.60106	-1.50883	12.7109	8.0799	1.00333	15.1565	3.14567	-3.68107	9.9724
-49	8.99799	2.28319	15.7128	6.01846	-1.10914	13.1461	7.92422	0.996314	14.8521	2.9967	-3.79013	9.78354
-48	9.06938	2.24589	15.8929	6.84627	-0.23432	13.9269	7.5824	0.848011	14.3168	3.53203	-3.06833	10.1324
-47	8.67446	1.66219	15.6867	8.05999	1.12011	14.9999	6.90036	0.329319	13.4714	4.69414	-1.68264	11.0709
-46	8.11633	0.92245	15.3102	9.37244	2.62007	16.1248	6.38367	-0.0633926	12.8307	5.82694	-0.391413	12.0453
-45	7.42832	0.187711	14.6689	10.6699	4.11015	17.2296	5.98303	-0.398412	12.3645	6.76424	0.587453	12.941
-44	6.68639	-0.463073	13.8359	11.8775	5.46895	18.286	5.72076	-0.68069	12.1222	7.32157	1.09376	13.5494
-43	6.20457	-0.795479	13.2046	12.683	6.35933	19.0066	5.94484	-0.547816	12.4375	7.18272	0.889756	13.4757
-42	5.96776	-0.909871	12.8454	13.1391	6.85058	19.4276	6.68691	0.0132289	13.3606	6.35039	0.0296878	12.6711
-41	6.20094	-0.685677	13.0876	13.1459	6.85857	19.4331	7.64937	0.770961	14.5278	5.0295	-1.21481	11.2738
-40	6.75153	-0.284159	13.7872	12.6974	6.41141	18.9834	8.719	1.68865	15.7493	3.48571	-2.63793	9.60934
-39	7.42578	0.149755	14.7018	12.0649	5.78662	18.3433	9.61256	2.55637	16.6688	2.19564	-3.81621	8.2075
-38	8.07875	0.602986	15.5545	11.2688	4.96895	17.5687	10.2823	3.2774	17.2871	1.36322	-4.62829	7.35472
-37	8.75724	1.23096	16.2835	10.4606	4.07867	16.8426	10.5058	3.58004	17.4316	1.31813	-4.77927	7.41554
-36	9.03432	1.63153	16.4371	9.74499	3.23587	16.2541	10.4492	3.55897	17.3395	1.95549	-4.33878	8.24976
-35	8.82555	1.61154	16.0396	9.32029	2.65902	15.9816	9.95545	3.03576	16.8751	3.38446	-3.09638	9.8653
-34	8.25392	1.22966	15.2782	9.12044	2.34059	15.9003	9.21688	2.20708	16.2267	5.46147	-1.13785	12.0608
-33	7.30181	0.391022	14.2126	9.13175	2.32833	15.9352	8.47196	1.43096	15.513	7.76764	1.13151	14.4038
-32	6.25407	-0.660301	13.1684	9.34434	2.58542	16.1033	7.91605	0.955809	14.8763	10.0081	3.3738	16.6425
-31	5.26247	-1.76384	12.2888	9.73758	3.05057	16.4246	7.70541	0.967185	14.4436	11.8009	5.17172	18.4302
-30	4.57088	-2.57814	11.7199	10.3142	3.63545	16.993	7.77746	1.35851	14.1964	12.9699	6.32829	19.6114
-29	4.1481	-3.06788	11.3641	11.0574	4.29301	17.8218	8.01344	1.9041	14.1228	13.3963	6.75091	20.0418
-28	4.20844	-3.00421	11.4211	11.6735	4.73594	18.6111	8.34042	2.42586	14.255	13.1241	6.49497	19.7532
-27	4.68705	-2.47355	11.8477	12.2934	5.14442	19.4423	8.7167	2.78883	14.6446	12.2314	5.6916	18.7711
-26	5.35646	-1.77	12.4829	12.6	5.35269	19.8472	8.92508	2.80773	15.0424	11.0229	4.63035	17.4154
-25	6.00855	-1.13354	13.1506	12.6822	5.48384	19.8805	8.81145	2.45504	15.1679	9.67549	3.45692	15.8941
-24	6.47467	-0.760658	13.71	12.4135	5.41915	19.4079	8.39391	1.84039	14.9474	8.39673	2.31571	14.4778
-23	6.73354	-0.647823	14.1149	11.6571	4.95044	18.3638	7.81078	1.20431	14.4173	7.42065	1.4139	13.4274
-22	6.49721	-1.00783	14.0023	10.4844	4.01714	16.9517	7.11287	0.583184	13.6426	6.64042	0.621221	12.6596
-21	5.86312	-1.67865	13.4049	8.83827	2.42101	15.2555	6.38322	0.0126874	12.7538	6.16748	0.0698839	12.2651
-20	4.97337	-2.57741	12.5242	6.9976	0.373608	13.6216	5.74173	-0.501826	11.9853	5.85473	-0.322096	12.0316
-19	4.01935	-3.53026	11.569	4.96935	-2.03911	11.9778	5.26868	-0.96471	11.5021	5.62718	-0.604175	11.8585
-18	2.97743	-4.62673	10.5816	3.02529	-4.38543	10.436	4.89994	-1.43733	11.2372	5.63149	-0.590983	11.854
-17	2.28049	-5.41456	9.97554	1.38896	-6.26274	9.04066	4.6276	-1.86422	11.1194	5.62027	-0.565613	11.8062
-16	2.2849	-5.46432	10.0341	0.0679288	-7.54928	7.68514	4.54163	-2.09128	11.1745	5.59359	-0.569221	11.7564
-15	2.76168	-4.94859	10.4719	-0.68057	-7.98281	6.62167	4.47899	-2.19999	11.158	5.83086	-0.370871	12.0326
-14	3.83222	-3.70563	11.3701	-1.01945	-7.8722	5.8333	4.51354	-2.12075	11.1478	6.28194	0.0211862	12.5427
-13	5.40252	-1.87784	12.6829	-0.884537	-7.38039	5.61131	4.67682	-1.87281	11.2265	6.94561	0.648754	13.2425
-12	7.46481	0.420456	14.5092	-0.448258	-6.94928	6.05277	4.99297	-1.46641	11.4524	7.94496	1.67552	14.2144
-11	9.74563	2.79715	16.6941	0.275636	-6.56695	7.11823	5.60011	-0.793908	11.9941	9.10554	2.93469	15.2764
-10	11.868	4.87669	18.8593	1.35985	-5.97053	8.69022	6.39609	0.0290002	12.7632	10.4373	4.41264	16.4619
-9	13.6687	6.5426	20.7949	2.61005	-5.07365	10.2937	7.48633	1.13973	13.8329	11.6598	5.76337	17.5562
-8	15.0992	7.85151	22.3469	4.00098	-3.77116	11.7731	8.89631	2.57157	15.2211	12.6643	6.80796	18.5206
-7	15.857	8.53549	23.1785	5.58941	-1.9884	13.1672	10.5481	4.26605	16.8301	13.1168	7.17334	19.0602
-6	15.9817	8.70038	23.263	7.27285	0.0949555	14.4507	11.9935	5.75462	18.2324	13.2405	7.10432	19.3767
-5	15.3465	8.2253	22.4677	8.78388	2.06169	15.5061	13.238	7.02828	19.4478	12.8905	6.52322	19.2579
-4	14.0301	7.13045	20.9297	10.2296	3.88167	16.5776	13.9829	7.81381	20.152	12.0327	5.4833	18.582
-3	12.4747	5.77583	19.1736	11.2801	5.13271	17.4275	14.0614	7.9473	20.1756	10.7946	4.17709	17.4121
-2	10.6687	4.06031	17.2771	11.8763	5.77515	17.9775	13.3499	7.30389	19.3958	9.34309	2.79799	15.8882
-1	8.91355	2.23326	15.5938	11.9602	5.81091	18.1096	11.9862	6.0035	17.9689	7.8276	1.45688	14.1983
0	7.16042	0.326534	13.9943	11.6357	5.39188	17.8794	10.1511	4.19819	16.1041	6.39816	0.256102	12.5402
1	5.95889	-1.02553	12.9433	10.7559	4.40799	17.1038	7.83279	1.83163	13.8339	5.34713	-0.62206	11.3163
2	5.20688	-1.8176	12.2314	9.59959	3.12119	16.078	5.66038	-0.478061	11.7988	4.59172	-1.30808	10.4915
3	4.98896	-1.9283	11.9062	8.27275	1.6576	14.8879	3.82761	-2.50031	10.1555	4.31272	-1.60549	10.2309
4	5.12963	-1.63073	11.89	7.05213	0.272366	13.8319	2.34387	-4.16012	8.84786	4.56537	-1.42158	10.5523
5	5.63005	-1.03012	12.2902	6.18677	-0.74747	13.121	1.47925	-5.08863	8.04713	5.07291	-0.943374	11.0892
6	6.43956	-0.256944	13.1361	5.6681	-1.40132	12.7375	1.2816	-5.2286	7.79179	5.98359	0.00858023	11.9586
7	7.34968	0.466074	14.2333	5.60742	-1.51751	12.7323	1.53107	-4.83744	7.89958	7.03314	1.18192	12.8844
8	8.41641	1.28415	15.5487	5.80707	-1.26689	12.881	2.06708	-4.18181	8.31597	8.2613	2.57478	13.9478
9	9.4655	2.11409	16.8169	6.35072	-0.567088	13.2685	2.7472	-3.46854	8.96295	9.3346	3.78082	14.8884
10	10.3985	2.9436	17.8534	7.08359	0.400004	13.7672	3.32722	-2.99044	9.64489	10.2436	4.6555	15.8317
11	11.0977	3.676	18.5193	7.8977	1.44528	14.3501	3.84886	-2.65312	10.3508	10.854	5.03781	16.6702
12	11.6045	4.31276	18.8963	8.80279	2.50643	15.0992	4.19562	-2.47563	10.8669	11.0922	4.89615	17.2882
13	11.9329	4.7787	19.087	9.63908	3.37121	15.907	4.42728	-2.29463	11.1492	10.9655	4.37847	17.5526
14	11.9495	4.84641	19.0527	10.3129	3.94306	16.6827	4.72066	-1.96702	11.4083	10.5881	3.66878	17.5073
15	11.6078	4.42424	18.7915	10.7989	4.23031	17.3674	5.04694	-1.57651	11.6704	9.99175	2.92392	17.0596
16	11.0755	3.72588	18.425	11.1248	4.33698	17.9127	5.58986	-1.0026	12.1823	9.13178	2.1136	16.15
17	10.4493	2.93061	17.9681	11.2567	4.28159	18.2319	6.25426	-0.356145	12.8647	8.28023	1.41212	15.1483
18	9.87897	2.26573	17.4922	11.1448	4.01809	18.2714	7.04065	0.360715	13.7206	7.42388	0.71132	14.1364
19	9.38699	1.82277	16.9512	10.9936	3.78015	18.2071	7.7273	0.982922	14.4717	6.67071	0.0347072	13.3067
20	9.34385	1.92307	16.7646	10.6072	3.35114	17.8633	8.22757	1.49969	14.9554	6.0384	-0.643671	12.7205
21	9.61512	2.36803	16.8622	10.0956	2.79522	17.396	8.59839	1.95594	15.2408	5.57358	-1.21533	12.3625
22	10.1686	3.07161	17.2656	9.62857	2.27619	16.9809	8.71569	2.1852	15.2462	5.12715	-1.71975	11.974
23	10.9692	3.93423	18.0042	9.33072	1.93628	16.7252	8.53916	2.1148	14.9635	4.8498	-1.93981	11.6394
24	11.7544	4.7712	18.7376	9.09702	1.69529	16.4987	8.21747	1.85137	14.5836	4.60307	-2.04179	11.2479
25	12.3512	5.42076	19.2817	9.13317	1.80241	16.4639	7.8051	1.40779	14.2024	4.36488	-2.14625	10.876
26	12.725	5.8366	19.6134	9.47421	2.33957	16.6089	7.42089	0.9536	13.8882	4.14713	-2.29366	10.5879
27	12.6883	5.79422	19.5824	10.0867	3.22138	16.9519	7.13873	0.624815	13.6527	3.92441	-2.56775	10.4166
28	12.2686	5.35129	19.186	10.8912	4.30475	17.4777	7.00533	0.522291	13.4884	3.78796	-2.81808	10.394
29	11.2951	4.31592	18.2743	11.8872	5.51939	18.2551	6.93731	0.539951	13.3347	3.75288	-2.94013	10.4459
30	10.3146	3.27352	17.3556	12.8494	6.59967	19.0991	6.88061	0.607123	13.1541	3.99615	-2.69489	10.6872
31	9.38151	2.32336	16.4397	13.6905	7.4725	19.9085	6.84655	0.698835	12.9943	4.46378	-2.13137	11.0589
32	8.65336	1.63523	15.6715	14.2701	8.01511	20.5251	6.74339	0.664828	12.822	5.17614	-1.31066	11.6629
33	8.1181	1.18219	15.054	14.4081	8.07434	20.7418	6.47823	0.427348	12.5291	6.20264	-0.184392	12.5897
34	7.97996	1.097	14.8629	14.1036	7.65042	20.5569	6.35123	0.303157	12.3993	7.28356	0.948497	13.6186
35	8.11594	1.23053	15.0014	13.1989	6.62435	19.7735	6.47906	0.439458	12.5187	8.30974	2.02345	14.596
36	8.46659	1.54323	15.3899	11.7772	5.12797	18.4265	6.68858	0.71402	12.6631	9.13691	2.91309	15.3607
37	8.86905	1.91465	15.8234	9.86606	3.20029	16.5318	7.0035	1.09704	12.9099	9.86251	3.69497	16.0301
38	9.28586	2.34795	16.2238	7.67154	1.05016	14.2929	7.59145	1.74035	13.4426	10.0393	3.93018	16.1485
39	9.58109	2.70996	16.4522	5.32056	-1.26228	11.9034	8.16639	2.31306	14.0197	9.94199	3.84876	16.0352
40	9.8714	3.07669	16.6661	3.14026	-3.43965	9.72018	8.75509	2.80112	14.7091	9.51867	3.38795	15.6494
41	10.2357	3.51373	16.9576	1.27324	-5.37445	7.92093	9.10129	2.9735	15.2291	8.97879	2.79486	15.1627
42	10.4887	3.79418	17.1833	-0.112826	-6.86156	6.6359	9.25804	2.97127	15.5448	8.59779	2.35408	14.8415
43	10.8161	4.15471	17.4775	-1.04461	-7.86405	5.77483	9.16697	2.79161	15.5423	8.54477	2.22758	14.862
44	11.2078	4.55442	17.8611	-1.41601	-8.23998	5.40796	8.8772	2.4898	15.2646	8.99099	2.60128	15.3807
45	11.4333	4.77318	18.0935	-1.28997	-8.06162	5.48167	8.6286	2.26773	14.9895	10.05	3.6027	16.4973
46	11.3622	4.66171	18.0628	-0.599579	-7.30811	6.10895	8.6391	2.2721	15.0061	11.7789	5.31177	18.246
47	10.8142	4.0814	17.5469	0.518373	-6.17481	7.21156	9.19366	2.77848	15.6088	13.958	7.51396	20.402
48	9.74339	2.99498	16.4918	2.02685	-4.69852	8.75222	10.2901	3.74096	16.8392	16.4055	10.0346	22.7763
49	8.01031	1.24992	14.7707	3.88631	-2.91597	10.6886	11.9473	5.24348	18.651	18.8577	12.562	25.1535
50	5.72645	-1.12318	12.5761	5.97011	-0.918231	12.8584	14.0416	7.24755	20.8357	21.108	14.8402	27.3758
51	3.14875	-3.93643	10.2339	8.23531	1.2758	15.1948	16.2672	9.44982	23.0846	22.9045	16.5854	29.2237
52	0.598527	-6.88158	8.07864	10.6659	3.68504	17.6467	18.2009	11.4087	24.9931	24.2776	17.8377	30.7175
53	-1.52081	-9.45185	6.41023	12.9633	5.97446	19.9522	19.5006	12.7147	26.2865	25.1748	18.6238	31.7258
54	-2.82338	-11.0964	5.44965	14.8046	7.82515	21.784	20.1741	13.3436	27.0046	25.6601	19.0691	32.2511
55	-3.11534	-11.4963	5.26563	16.1464	9.23207	23.0607	20.0028	13.0986	26.9071	26.0455	19.5325	32.5585
56	-2.30369	-10.5364	5.92905	16.8656	10.032	23.6991	19.2122	12.2652	26.1593	26.3466	19.9743	32.7189
57	-0.517168	-8.41157	7.37724	16.6116	9.86463	23.3586	18.1583	11.2306	25.0861	26.6369	20.4063	32.8675
58	2.04696	-5.5207	9.61462	15.4336	8.77573	22.0915	17.2681	10.4076	24.1285	27.0135	20.8275	33.1995
59	5.04893	-2.41282	12.5107	13.3356	6.7726	19.8986	16.9541	10.1416	23.7665	27.3813	21.1319	33.6307
60	7.95755	0.342899	15.5722	10.7711	4.30887	17.2333	17.3758	10.5744	24.1771	27.7696	21.4471	34.0921
61	10.3287	2.3956	18.2618	7.93809	1.55015	14.326	18.6378	11.7896	25.486	28.0948	21.7419	34.4477
62	11.8086	3.59168	20.0256	5.11854	-1.28815	11.5252	20.7017	13.8073	27.5961	28.3009	22.0023	34.5994
63	12.2335	3.92238	20.5447	2.67312	-3.87901	9.22525	23.4539	16.5876	30.3201	28.4333	22.2656	34.601
64	11.5385	3.35865	19.7184	0.841974	-5.94742	7.63137	26.4998	19.7914	33.2082	28.5693	22.4947	34.6439
65	10.1178	2.23069	18.0048	-0.286111	-7.31279	6.74057	29.5019	22.9766	36.0272	28.8743	22.7788	34.9698
66	8.09028	0.54606	15.6345	-0.643066	-7.80843	6.5223	32.3304	25.9179	38.743	29.6453	23.4468	35.8439
67	5.82302	-1.48244	13.1285	-0.384817	-7.55443	6.78479	34.7663	28.3057	41.227	30.8512	24.5239	37.1785
68	3.64163	-3.57013	10.8534	0.31013	-6.75164	7.3719	36.6643	30.0389	43.2896	32.7734	26.3779	39.1689
69	2.00981	-5.2548	9.27442	1.20522	-5.70049	8.11092	38.1607	31.3464	44.9751	35.149	28.8273	41.4707
70	0.890966	-6.50825	8.29018	2.30713	-4.48889	9.10316	39.1747	32.2524	46.0969	37.8396	31.7249	43.9543
71	0.199844	-7.33957	7.73926	3.3979	-3.38787	10.1837	39.7464	32.8814	46.6114	40.5375	34.6784	46.3966
72	-0.00715819	-7.64265	7.62834	4.51009	-2.32407	11.3442	39.907	33.2261	46.5879	42.7712	37.1012	48.4412
73	0.258169	-7.37752	7.89386	5.65004	-1.22252	12.5226	39.5966	33.166	46.0272	44.1608	38.5313	49.7903
74	0.757535	-6.80927	8.32434	6.93248	0.0607949	13.8042	38.7059	32.4629	44.9489	44.4398	38.6634	50.2162
75	1.43336	-6.01137	8.8781	8.39465	1.5668	15.2225	37.1849	31.0089	43.3609	43.4266	37.4229	49.4303
76	2.14064	-5.13753	9.41881	10.1717	3.4179	16.9255	35.3203	29.1139	41.5268	41.0146	34.8218	47.2073
77	3.04617	-4.07411	10.1664	11.9719	5.31444	18.6294	33.1667	26.8892	39.4441	37.4092	31.138	43.6803
78	3.98256	-3.05467	11.0198	13.7657	7.20408	20.3273	30.9993	24.649	37.3496	32.8921	26.6578	39.1265
79	5.09336	-1.9484	12.1351	15.2726	8.80054	21.7446	28.8541	22.4794	35.2287	28.0775	21.9513	34.2037
80	6.46489	-0.648236	13.578	16.233	9.83358	22.6325	27.095	20.7202	33.4699	23.2915	17.2222	29.3609
81	7.96106	0.70208	15.22	16.4797	10.0904	22.869	25.7443	19.3625	32.1261	19.0459	12.9234	25.1685
82	9.46886	2.08096	16.8568	15.9116	9.47788	22.3453	24.8425	18.3966	31.2884	15.7399	9.44404	22.0358
83	10.8794	3.36733	18.3916	14.4188	7.89256	20.9451	24.4049	17.8279	30.982	13.5152	7.00381	20.0267
84	11.9797	4.37034	19.5891	12.2017	5.52782	18.8755	24.3132	17.5962	31.0301	12.394	5.73628	19.0517
85	12.696	5.0048	20.3871	9.68994	2.86768	16.5122	24.234	17.3922	31.0757	12.4455	5.75212	19.139
86	12.6636	4.92201	20.4051	7.04901	0.0898871	14.0081	24.0602	17.1757	30.9448	13.3722	6.73234	20.0121
87	12.0522	4.27446	19.8299	4.60782	-2.45787	11.6735	23.983	17.1966	30.7694	14.9489	8.42386	21.474
88	11.0138	3.2234	18.8043	2.55963	-4.55211	9.67136	23.7952	17.1993	30.391	16.8079	10.3816	23.2341
89	9.52073	1.76922	17.2722	1.0784	-5.96549	8.12229	23.361	16.9961	29.726	18.7571	12.3829	25.1313
90	7.96057	0.352564	15.5686	0.139935	-6.74077	7.02064	22.904	16.74	29.068	20.6603	14.315	27.0056
91	6.60666	-0.800747	14.0141	-0.256728	-6.95375	6.44029	22.5736	16.5332	28.6139	22.2268	15.9222	28.5314
92	5.48232	-1.71058	12.6752	-0.399843	-7.00409	6.2044	22.3315	16.3616	28.3013	23.4142	17.2008	29.6276
93	4.83401	-2.2153	11.8833	-0.193618	-6.86765	6.48042	22.1439	16.2226	28.0652	24.361	18.2723	30.4498
94	4.84163	-2.20878	11.892	0.132904	-6.76149	7.0273	21.8669	15.9988	27.7351	25.1365	19.1352	31.1379
95	5.19428	-1.9564	12.3449	0.623537	-6.50526	7.75233	21.5457	15.6976	27.3938	25.8072	19.7707	31.8436
96	5.94136	-1.29429	13.177	1.04302	-6.21558	8.30163	21.1511	15.2243	27.0779	26.306	20.0763	32.5357
97	6.98159	-0.305904	14.2691	1.57093	-5.64342	8.78529	20.5086	14.3987	26.6186	26.7894	20.2423	33.3364
98	8.20113	0.879513	15.5228	2.01355	-4.97859	9.00568	19.8119	13.4533	26.1705	27.097	20.1697	34.0244
99	9.27243	1.94644	16.5984	2.62316	-4.04546	9.29179	19.2052	12.646	25.7644	27.1022	19.8656	34.3388
100	10.1987	2.80194	17.5955	3.16422	-3.1975	9.52594	18.8457	12.1926	25.4989	26.7786	19.4199	34.1373
101	10.8814	3.36235	18.4004	3.71274	-2.45713	9.88261	18.6399	11.9974	25.2825	26.0332	18.7744	33.2919
102	11.2862	3.60366	18.9688	3.99573	-2.15561	10.1471	18.6371	12.0477	25.2265	24.9257	17.9725	31.8789
103	11.4103	3.60429	19.2163	4.22402	-2.05516	10.5032	18.7495	12.1889	25.31	23.5574	16.9793	30.1355
104	11.2801	3.4663	19.0939	4.33673	-2.21281	10.8863	18.8789	12.309	25.4488	22.0389	15.7525	28.3253
105	10.8544	3.14468	18.5642	4.62054	-2.25601	11.4971	18.8391	12.2343	25.4438	20.6111	14.3615	26.8607
106	10.1547	2.63659	17.6728	4.96721	-2.17903	12.1135	18.5844	12.0043	25.1644	19.4997	13.0664	25.933
107	9.33779	1.98834	16.6872	5.40856	-1.91997	12.7371	18.2457	11.762	24.7293	18.8296	12.1664	25.4928
108	8.39465	1.08877	15.7005	6.0407	-1.33167	13.4131	17.6372	11.3135	23.9609	18.6371	11.831	25.4433
109	7.44005	0.0294175	14.8507	6.83793	-0.455192	14.131	16.9993	10.8179	23.1806	18.8644	12.0852	25.6437
110	6.55232	-1.06322	14.1679	7.62112	0.482907	14.7593	16.5636	10.3911	22.7361	19.359	12.7689	25.9492
111	5.78744	-2.05946	13.6343	8.42816	1.43974	15.4166	16.5459	10.2242	22.8676	19.9528	13.5652	26.3405
112	5.16047	-2.85116	13.1721	9.09293	2.19024	15.9956	16.9276	10.3757	23.4795	20.3808	14.1051	26.6565
113	4.90168	-3.14485	12.9482	9.52603	2.60631	16.4457	17.6737	10.9381	24.4092	20.4649	14.1817	26.748
114	5.01321	-2.92217	12.9486	9.89142	2.85294	16.9299	18.6005	11.8284	25.3727	20.13	13.7912	26.4687
115	5.4993	-2.17528	13.1739	10.2468	3.06281	17.4309	19.4425	12.7711	26.114	19.2828	12.9396	25.626
116	6.2655	-1.03396	13.565	10.4581	3.1415	17.7747	19.9197	13.473	26.3665	18.0625	11.806	24.3189
117	7.52602	0.592758	14.4593	10.6223	3.27839	17.9662	19.8146	13.5759	26.0533	16.523	10.3832	22.6628
118	9.03469	2.27398	15.7954	10.7557	3.48287	18.0286	19.0411	12.9055	25.1767	14.7287	8.70225	20.7551
119	10.6437	3.7423	17.545	10.9138	3.78666	18.0409	17.6326	11.5195	23.7457	12.9211	6.94907	18.8931
120	12.1229	4.82775	19.418	11.1538	4.18766	18.12	15.8518	9.70036	22.0032	11.1219	5.15854	17.0852
121	13.1549	5.46225	20.8476	11.3778	4.50147	18.2542	13.8934	7.73557	20.0513	9.45144	3.46473	15.4381
122	13.6373	5.71354	21.5611	11.5999	4.7197	18.4801	12.204	6.10131	18.3066	7.76723	1.74342	13.791
123	13.4552	5.55749	21.3529	11.8179	4.91758	18.7182	10.9346	4.94035	16.9289	6.24366	0.151124	12.3362
124	12.317	4.65058	19.9835	12.0546	5.15993	18.9493	10.125	4.23598	16.014	4.77332	-1.40937	10.956
125	10.376	3.02264	17.7294	12.1011	5.22637	18.9758	9.97528	4.15321	15.7974	3.33541	-2.96254	9.63336
126	7.93923	0.812503	15.066	12.0097	5.14755	18.8719	9.98873	4.18515	15.7923	2.20258	-4.19252	8.59768
127	5.24687	-1.73033	12.2241	11.6658	4.76019	18.5714	10.2154	4.38227	16.0485	1.4928	-4.94399	7.92959
128	2.47031	-4.41673	9.35734	11.1148	4.08095	18.1486	10.288	4.35249	16.2235	1.13801	-5.30648	7.5825
129	0.392802	-6.42306	7.20866	9.95466	2.74762	17.1617	10.149	4.07276	16.2253	1.42327	-4.99967	7.84621
130	-0.793936	-7.60509	6.01722	8.31521	0.972107	15.6583	9.46291	3.19402	15.7318	2.2739	-4.12895	8.67676
131	-0.876548	-7.79138	6.03828	6.27685	-1.10615	13.6599	8.42027	1.95461	14.8859	3.53719	-2.84155	9.91593
132	0.136628	-7.03151	7.30476	4.06285	-3.24839	11.3741	7.24228	0.613184	13.8714	5.0406	-1.27991	11.3611
133	2.3599	-5.13875	9.85855	1.96763	-5.18922	9.12447	5.99914	-0.732608	12.7309	6.56392	0.366693	12.7612
134	5.12615	-2.66151	12.9138	0.463971	-6.45991	7.38785	4.78474	-1.94203	11.5115	7.77066	1.73825	13.8031
135	8.01965	0.0599133	15.9794	-0.170814	-6.84785	6.50622	3.67602	-2.93825	10.2903	8.69414	2.80777	14.5805
136	10.4423	2.44426	18.4403	0.178843	-6.31788	6.67556	2.93715	-3.49949	9.37378	8.96207	3.10659	14.8175
137	12.177	4.26943	20.0845	1.50673	-4.91568	7.92913	2.28894	-4.02975	8.60763	8.52993	2.55551	14.5044
138	12.89	5.21108	20.5688	3.69205	-2.76935	10.1535	1.6477	-4.70106	7.99646	7.51839	1.35447	13.6823
139	12.7299	5.38015	20.0797	6.22945	-0.350291	12.8092	1.12333	-5.42312	7.66978	6.07957	-0.239026	12.3982
140	11.6643	4.70763	18.621	8.72665	2.00571	15.4476	0.545675	-6.27984	7.37119	4.58943	-1.77658	10.9554
141	10.2249	3.55728	16.8925	10.5235	3.6701	17.3769	0.0317302	-7.01367	7.07713	3.00278	-3.26921	9.27478
142	8.88181	2.24056	15.5231	11.3536	4.4084	18.2987	-0.461069	-7.55549	6.63335	1.73406	-4.33328	7.8014
143	7.74963	0.773396	14.7259	11.1878	4.17502	18.2005	-0.719119	-7.63952	6.20128	0.811824	-5.0345	6.65815
144	7.29888	-0.258546	14.8563	10.1392	3.0764	17.202	-0.665775	-7.27077	5.93922	0.122526	-5.58129	5.82634
145	7.33981	-0.816551	15.4962	8.52003	1.41164	15.6284	-0.434375	-6.66817	5.79942	-0.222212	-5.9192	5.47478
146	7.87274	-0.651002	16.3965	6.78081	-0.348136	13.9097	-0.0865909	-6.05878	5.8856	-0.151037	-5.97648	5.67441
147	8.57009	0.012397	17.1278	5.47703	-1.66574	12.6198	0.472471	-5.39917	6.34412	0.159614	-5.86256	6.18179
148	9.17598	0.901012	17.451	5.00638	-2.14728	12.16	1.01868	-4.91939	6.95674	0.575565	-5.62634	6.77747
149	9.41699	1.6653	17.1687	5.40412	-1.73521	12.5435	1.44093	-4.65244	7.53431	1.24075	-5.07187	7.55338
150	9.06064	1.88641	16.2349	6.71158	-0.379479	13.8026	1.58014	-4.71435	7.87463	2.1118	-4.22001	8.44362
151	8.34351	1.57292	15.1141	8.45158	1.42506	15.4781	1.54717	-4.93408	8.02841	3.1065	-3.18404	9.39704
152	7.25634	0.550268	13.9624	10.3051	3.31709	17.2931	1.18856	-5.43834	7.81546	4.23685	-1.98031	10.454
153	6.05101	-0.908733	13.0108	11.8558	4.87582	18.8359	0.572593	-6.12469	7.26988	5.34652	-0.828015	11.5211
154	5.0572	-2.33152	12.4459	12.6527	5.64334	19.662	0.00774198	-6.65268	6.66817	6.34834	0.191071	12.5056
155	4.52508	-3.27966	12.3298	12.4813	5.38999	19.5726	-0.730458	-7.22982	5.7689	7.18186	1.04636	13.3174
156	4.62506	-3.39665	12.6468	11.4236	4.26502	18.5821	-1.23685	-7.50997	5.03626	7.65987	1.59354	13.7262
157	5.03186	-2.98259	13.0463	9.73815	2.58023	16.8961	-1.42105	-7.48648	4.64438	7.51424	1.58866	13.4398
158	5.7845	-2.03073	13.5997	7.48115	0.425996	14.5363	-1.23927	-7.21327	4.73474	6.80396	1.04186	12.5661
159	6.5488	-0.91489	14.0125	5.2319	-1.61866	12.0825	-0.730307	-6.7578	5.29719	5.59462	-0.0258725	11.2151
160	7.21518	0.162099	14.2683	3.28813	-3.33391	9.91017	0.123385	-6.09225	6.33902	4.01629	-1.53968	9.57227
161	7.41247	0.71331	14.1116	1.92209	-4.52373	8.36791	1.32125	-5.13122	7.77371	2.33174	-3.26851	7.93199
162	7.27294	0.757216	13.7887	1.27858	-5.11047	7.66763	2.56823	-4.07703	9.21349	0.77997	-4.94787	6.50781
163	6.60262	0.000990365	13.2042	1.3199	-5.21217	7.85196	3.75775	-2.99319	10.5087	-0.484762	-6.37264	5.40312
164	5.75064	-1.17519	12.6765	1.93694	-4.89154	8.76543	4.78192	-1.9549	11.5187	-1.144	-7.16736	4.87936
165	4.83781	-2.51851	12.1941	2.83069	-4.36762	10.029	5.51756	-1.07243	12.1076	-1.24683	-7.36568	4.87202
166	4.34716	-3.39495	12.0893	3.80576	-3.66445	11.276	5.76457	-0.609793	12.1389	-0.787925	-6.92876	5.35291
167	4.33307	-3.60961	12.2757	4.60368	-2.94774	12.1551	5.4951	-0.673342	11.6636	0.104041	-5.99218	6.20026
168	5.14502	-2.74778	13.0378	4.95778	-2.43482	12.3504	5.01772	-1.00863	11.0441	1.23664	-4.7654	7.23867
169	6.40618	-1.21971	14.0321	4.86645	-2.1565	11.8894	4.31688	-1.67273	10.3065	2.59569	-3.31942	8.51079
170	8.24841	0.985372	15.5114	4.24635	-2.38545	10.8782	3.62728	-2.44048	9.69503	3.75513	-2.13174	9.64201
171	10.2047	3.27711	17.1323	3.35243	-3.08932	9.79418	3.27967	-2.88815	9.4475	4.70317	-1.25164	10.658
172	11.7439	4.9926	18.4952	2.38682	-4.12783	8.90148	3.32207	-2.937	9.58114	5.49362	-0.606504	11.5937
173	12.7257	5.98448	19.467	1.39952	-5.37859	8.17764	3.84697	-2.46527	10.1592	5.91979	-0.35007	12.1897
174	12.9073	6.10351	19.7111	0.785399	-6.245	7.8158	4.82123	-1.52268	11.1651	6.18865	-0.181505	12.5588
175	12.0926	5.19257	18.9925	0.60739	-6.53216	7.74694	6.06537	-0.291114	12.4218	6.4078	0.053354	12.7623
176	10.3777	3.35174	17.4037	0.890054	-6.17546	7.95556	7.45944	1.09812	13.8208	6.69839	0.452784	12.944
177	8.16229	0.971578	15.353	1.60211	-5.27759	8.48182	8.70602	2.34223	15.0698	7.00255	0.907813	13.0973
178	5.88719	-1.52709	13.3015	2.6039	-4.13792	9.34572	9.73498	3.38851	16.0815	7.49703	1.53699	13.4571
179	3.59614	-4.05885	11.2511	3.80813	-2.96661	10.5829	10.177	3.84664	16.5073	8.15583	2.23951	14.0721
180	1.75033	-6.03556	9.53622	4.90588	-2.09745	11.9092	10.1765	3.84441	16.5087	8.90636	2.94471	14.868
181	0.766979	-6.98891	8.52287	5.72793	-1.60293	13.0588	9.87661	3.49913	16.2541	9.60877	3.53365	15.6839
182	0.599728	-6.95836	8.15781	6.26848	-1.34641	13.8834	9.26917	2.81064	15.7277	10.1394	3.91223	16.3666
183	1.2079	-5.99731	8.4131	6.57265	-1.15042	14.2957	8.64553	2.12185	15.1692	10.4396	4.06909	16.8101
184	2.52593	-4.29875	9.3506	6.69178	-0.914535	14.2981	7.91368	1.36604	14.4613	10.4874	4.03173	16.9431
185	4.19755	-2.35447	10.7496	6.85121	-0.46272	14.1651	7.07252	0.579308	13.5657	10.3903	3.92341	16.8572
186	5.76342	-0.691915	12.2188	7.22351	0.293402	14.1536	6.3139	-0.0510827	12.6789	10.0669	3.68709	16.4468
187	7.12199	0.536312	13.7077	7.8485	1.26936	14.4276	5.40298	-0.837676	11.6436	9.60963	3.39093	15.8283
188	8.03871	1.13275	14.9447	8.90986	2.52966	15.2901	4.3153	-1.86311	10.4937	9.18056	3.13552	15.2256
189	8.68718	1.43624	15.9381	10.1337	3.77346	16.494	3.09412	-3.15616	9.3444	8.82583	2.89099	14.7607
190	8.95209	1.43596	16.4682	11.4324	4.96589	17.8988	1.69106	-4.7994	8.18153	8.56641	2.58586	14.547
191	8.98198	1.33172	16.6322	12.6009	5.97351	19.2283	0.313843	-6.49762	7.1253	8.19544	2.00092	14.39
192	8.903	1.22026	16.5857	13.3768	6.59214	20.1614	-0.780608	-7.90303	6.34182	7.62529	1.12421	14.1264
193	8.73825	1.09544	16.3811	13.6493	6.75572	20.5428	-1.17911	-8.47163	6.11342	6.80426	0.0146744	13.5939
194	8.63506	1.03851	16.2316	13.3991	6.4424	20.3558	-0.909464	-8.17873	6.3598	5.7586	-1.16566	12.6829
195	8.57428	0.975541	16.173	12.6651	5.70703	19.6232	0.148086	-6.91698	7.21315	4.46823	-2.38854	11.325
196	8.43016	0.804495	16.0558	11.6153	4.72781	18.5027	2.05879	-4.71597	8.83355	2.96832	-3.65997	9.5966
197	8.29825	0.679041	15.9175	10.2057	3.45406	16.9573	4.58484	-1.9551	11.1248	1.48705	-4.8583	7.83239
198	7.93926	0.399853	15.4787	8.84059	2.27285	15.4083	7.37165	0.906652	13.8367	0.23259	-5.93742	6.4026
199	7.51241	0.137683	14.8871	7.65699	1.29499	14.019	9.86978	3.29214	16.4474	-0.661156	-6.85317	5.53086
200	6.94031	-0.248837	14.1295	6.80696	0.675637	12.9383	11.7475	4.97535	18.5196	-1.19013	-7.54775	5.16749

## Sheet: Panel_D
time	hRightEyeVelControl_Mean	hRightEyeVelControl_95ci_low	hRightEyeVelControl_95ci_up	hLeftEyeVelControl_Mean	hLeftEyeVelControl_95ci_low	hLeftEyeVelControl_95ci_up	hRightEyeVelFull_Mean	hRightEyeVelFull_95ci_low	hRightEyeVelFull_95ci_up	hLeftEyeVelFull_Mean	hLeftEyeVelFull_95ci_low	hLeftEyeVelFull_95ci_up
-100	0.618745	-8.14647	9.38396	2.47605	-5.73781	10.6899	-16.0267	-24.0919	-7.96152	12.1253	3.14073	21.1099
-99	-0.98771	-9.66987	7.69445	2.98261	-5.12145	11.0867	-14.8985	-22.9969	-6.80012	10.9469	2.41128	19.4825
-98	-3.51109	-12.1349	5.11276	3.5384	-4.75626	11.8331	-13.2158	-21.4388	-4.99274	9.47707	1.09983	17.8543
-97	-6.28369	-14.8578	2.29042	3.82639	-4.70864	12.3614	-11.0349	-19.4011	-2.66863	7.87853	-0.574301	16.3314
-96	-9.00589	-17.5743	-0.437451	4.01006	-4.7584	12.7785	-8.71668	-17.2209	-0.212451	6.54128	-2.04336	15.1259
-95	-11.5739	-20.1257	-3.022	4.37502	-4.47973	13.2298	-6.32699	-14.897	2.243	5.31991	-3.25978	13.8996
-94	-13.4391	-22.0168	-4.86134	4.48564	-4.35892	13.3302	-4.10546	-12.6984	4.48743	4.48779	-3.90529	12.8809
-93	-14.2	-22.8595	-5.54044	4.23791	-4.54879	13.0246	-2.38624	-10.8975	6.12503	4.008	-4.04147	12.0575
-92	-14.1095	-22.9463	-5.27259	4.05164	-4.74501	12.8483	-0.90668	-9.27207	7.45871	3.49186	-4.28317	11.2669
-91	-12.886	-21.8942	-3.87777	3.59529	-5.30678	12.4974	0.0984761	-8.02464	8.22159	3.03372	-4.63613	10.7036
-90	-10.8957	-19.977	-1.81445	2.85155	-6.22987	11.933	0.899062	-6.98297	8.7811	2.42141	-5.35052	10.1933
-89	-8.28804	-17.3404	0.764355	1.9864	-7.28574	11.2585	1.52123	-6.15687	9.19933	1.66801	-6.25771	9.59373
-88	-5.51812	-14.4001	3.36386	1.0662	-8.22841	10.3608	1.92967	-5.67614	9.53548	0.636676	-7.36442	8.63777
-87	-2.85637	-11.5231	5.81037	0.186099	-8.95261	9.32481	2.09535	-5.5783	9.769	-0.503774	-8.3968	7.38925
-86	-0.50735	-9.03408	8.01938	-0.59906	-9.41489	8.21677	2.36608	-5.47832	10.2105	-1.74077	-9.47175	5.99021
-85	1.28389	-7.28671	9.85449	-1.26304	-9.70942	7.18333	2.55779	-5.49004	10.6056	-2.95544	-10.6305	4.71963
-84	2.47695	-6.29553	11.2494	-1.7948	-9.90054	6.31095	2.73351	-5.46646	10.9335	-3.98239	-11.7744	3.80966
-83	3.43606	-5.61137	12.4835	-2.28559	-10.2476	5.67647	2.75274	-5.51965	11.0251	-4.66083	-12.7362	3.41454
-82	3.87411	-5.47079	13.219	-2.60657	-10.5744	5.36125	2.7016	-5.53281	10.936	-4.64944	-13.076	3.77716
-81	3.96627	-5.61904	13.5516	-2.86229	-10.9793	5.25475	2.82228	-5.29116	10.9357	-4.35149	-13.048	4.345
-80	3.89929	-5.87738	13.676	-2.8689	-11.1997	5.46188	3.00594	-5.00778	11.0197	-3.79391	-12.5882	5.0004
-79	3.55437	-6.32626	13.435	-2.69863	-11.2495	5.85225	3.31983	-4.63833	11.278	-3.07156	-11.7587	5.61556
-78	2.97458	-6.89158	12.8407	-2.37363	-11.0874	6.34012	3.85361	-4.17004	11.8772	-2.52177	-10.9961	5.95258
-77	1.92045	-7.78744	11.6283	-1.81253	-10.5851	6.96002	4.3045	-3.8704	12.4794	-2.23479	-10.5237	6.05411
-76	0.469396	-8.94769	9.88648	-0.954082	-9.67238	7.76421	4.55341	-3.77933	12.8862	-2.27639	-10.4674	5.91461
-75	-1.53863	-10.5729	7.49562	-0.100868	-8.70339	8.50166	4.37749	-4.07659	12.8316	-2.44048	-10.6856	5.80466
-74	-4.12197	-12.7575	4.51353	0.78287	-7.64848	9.21422	3.71473	-4.75589	12.1853	-2.69022	-11.0927	5.71221
-73	-6.7103	-15.0707	1.65007	1.27981	-6.98073	9.54034	2.67429	-5.73806	11.0866	-2.72493	-11.3114	5.86152
-72	-9.3378	-17.5794	-1.09619	1.63415	-6.47237	9.74066	1.31674	-7.0011	9.63457	-2.575	-11.3227	6.17265
-71	-11.57	-19.9118	-3.22827	1.68522	-6.44108	9.81152	-0.406452	-8.65002	7.83712	-1.91464	-10.7366	6.90737
-70	-12.5202	-21.1031	-3.93737	1.19453	-7.17304	9.56211	-2.13818	-10.3453	6.0689	-1.13704	-9.98387	7.70979
-69	-12.1789	-21.0617	-3.29613	0.343061	-8.50602	9.19214	-3.69609	-11.9182	4.52598	-0.198332	-9.09776	8.7011
-68	-10.3934	-19.4753	-1.31141	-0.897891	-10.33	8.53418	-4.98603	-13.2643	3.29219	0.872522	-8.14113	9.88618
-67	-7.22551	-16.3832	1.93213	-2.26563	-12.2068	7.67556	-5.93358	-14.3053	2.43813	1.80995	-7.3081	10.928
-66	-3.10634	-12.2871	6.0744	-3.44811	-13.7008	6.80455	-6.60752	-15.0741	1.85909	2.4335	-6.68014	11.5471
-65	1.5241	-7.62136	10.6696	-4.48884	-14.7312	5.75357	-6.99973	-15.5655	1.56601	2.6336	-6.39031	11.6575
-64	6.13142	-2.94992	15.2128	-5.34151	-15.272	4.58894	-7.50511	-16.1357	1.12545	2.82791	-6.04864	11.7045
-63	9.73794	0.738698	18.7372	-5.60441	-14.9786	3.76983	-8.03441	-16.6797	0.610891	2.92773	-5.86656	11.722
-62	11.9965	3.1456	20.8473	-5.41853	-14.1699	3.33289	-8.61811	-17.1792	-0.0570133	3.04926	-5.7513	11.8498
-61	12.3796	3.69313	21.0661	-4.54521	-12.9504	3.85998	-9.22567	-17.5932	-0.858151	3.39211	-5.49365	12.2779
-60	11.0494	2.44446	19.6542	-3.35289	-11.7996	5.09378	-9.77203	-17.847	-1.69702	3.82148	-5.13974	12.7827
-59	8.00879	-0.627947	16.6455	-1.76651	-10.595	7.06196	-9.99252	-17.7646	-2.22046	4.2323	-4.73207	13.1967
-58	3.81794	-5.01254	12.6484	-0.268834	-9.63041	9.09274	-9.73702	-17.3012	-2.17284	4.44964	-4.44485	13.3441
-57	-0.763082	-9.90528	8.37911	0.738024	-9.02618	10.5022	-8.74785	-16.291	-1.20469	4.37432	-4.4901	13.2387
-56	-5.38478	-14.7982	4.0286	1.60845	-8.26071	11.4776	-7.17057	-14.8907	0.549588	3.73596	-5.20175	12.6737
-55	-9.47744	-18.9891	0.0342318	2.13472	-7.49983	11.7693	-5.19527	-13.1725	2.78198	2.87482	-6.15354	11.9032
-54	-12.5773	-21.9431	-3.21156	2.20601	-6.96461	11.3766	-3.07791	-11.2773	5.12144	1.66905	-7.39349	10.7316
-53	-14.3813	-23.455	-5.30751	1.8788	-6.79347	10.5511	-1.21002	-9.51399	7.09395	0.694374	-8.22263	9.61137
-52	-14.8695	-23.7016	-6.03745	1.22232	-7.23095	9.67559	0.38601	-7.8759	8.64792	-0.296916	-8.85611	8.26228
-51	-14.1676	-22.9706	-5.36464	0.389595	-8.27684	9.05603	1.38227	-6.70389	9.46842	-0.927349	-9.0662	7.2115
-50	-12.6661	-21.6444	-3.68786	-0.282929	-9.44405	8.8782	1.52917	-6.33433	9.39268	-1.1446	-9.05345	6.76426
-49	-10.7526	-19.9985	-1.50672	-0.817359	-10.4889	8.85422	1.14884	-6.55812	8.85581	-1.18713	-9.14611	6.77186
-48	-8.65307	-18.0325	0.726336	-1.1778	-11.0272	8.67162	0.175738	-7.51696	7.86843	-0.844035	-9.09788	7.40981
-47	-6.48474	-15.7827	2.81319	-1.27466	-10.9132	8.36391	-0.84892	-8.67152	6.97368	-0.577416	-9.18919	8.03436
-46	-4.49182	-13.5963	4.61271	-1.09735	-10.2598	8.06511	-2.10166	-10.1557	5.95235	-0.288873	-9.07286	8.49512
-45	-2.94672	-11.8321	5.93867	-0.361035	-8.94709	8.22502	-3.44928	-11.713	4.81441	0.0500005	-8.61607	8.71607
-44	-1.5279	-10.378	7.32225	0.423494	-7.87551	8.7225	-4.40174	-12.7826	3.97912	0.567112	-7.73056	8.86478
-43	-0.265199	-9.22311	8.69272	1.38215	-7.01639	9.78068	-5.18658	-13.5428	3.16969	1.20496	-6.64036	9.05028
-42	0.358239	-8.74816	9.46464	2.74911	-6.01667	11.5149	-6.10152	-14.3289	2.1259	2.27054	-5.26342	9.8045
-41	0.942339	-8.20177	10.0864	3.89104	-5.25871	13.0408	-7.09039	-15.1648	0.98406	3.51634	-4.0027	11.0354
-40	1.25832	-7.70129	10.2179	4.77142	-4.53177	14.0746	-7.76175	-15.725	0.201521	4.51085	-3.19271	12.2144
-39	1.21256	-7.40488	9.83001	5.27397	-3.97382	14.5218	-8.28694	-16.2198	-0.354121	5.43934	-2.47407	13.3528
-38	0.914947	-7.28279	9.11268	5.29297	-3.65894	14.2449	-8.5748	-16.5538	-0.595829	5.88479	-2.08603	13.8556
-37	0.345111	-7.54521	8.23543	4.87129	-3.75109	13.4937	-8.51891	-16.5928	-0.445015	5.45798	-2.36517	13.2811
-36	-0.258309	-8.08438	7.56776	3.81065	-4.57893	12.2002	-7.88008	-16.0469	0.286718	3.89767	-3.70066	11.496
-35	-0.965281	-9.07286	7.1423	2.05314	-6.28723	10.3935	-6.69832	-14.9755	1.5789	1.70377	-5.81477	9.22231
-34	-1.62847	-10.1791	6.92215	-0.336538	-8.80798	8.1349	-5.05244	-13.4085	3.30363	-0.885979	-8.55821	6.78625
-33	-2.35048	-11.3457	6.64476	-2.77257	-11.4551	5.90999	-3.06482	-11.4249	5.29524	-3.7324	-11.7331	4.26833
-32	-3.05496	-12.2861	6.17619	-5.05053	-13.8503	3.74926	-0.93293	-9.19479	7.32893	-6.22816	-14.5501	2.09375
-31	-3.5535	-12.757	5.65002	-6.82384	-15.5327	1.88501	0.92135	-7.10755	8.95025	-7.92	-16.3318	0.491792
-30	-4.11465	-13.1275	4.89823	-7.69426	-16.1179	0.729411	2.22118	-5.48486	9.92723	-8.40781	-16.5962	-0.219441
-29	-4.5938	-13.3448	4.15717	-7.70112	-15.7862	0.383965	3.12168	-4.32286	10.5662	-7.83927	-15.5909	-0.0876686
-28	-4.76522	-13.3396	3.80913	-6.94127	-14.8649	0.982387	3.29094	-4.11263	10.6945	-6.32021	-13.6313	0.990879
-27	-4.9288	-13.3934	3.53576	-5.45002	-13.5262	2.62614	3.05783	-4.55293	10.6686	-4.34623	-11.4359	2.74346
-26	-5.20678	-13.5586	3.14502	-3.11484	-11.476	5.24632	2.12101	-5.85603	10.098	-1.83851	-9.00238	5.32537
-25	-5.49582	-13.6368	2.64511	-0.315279	-8.79093	8.16038	1.04778	-7.27618	9.37173	0.166415	-7.39424	7.72707
-24	-5.65245	-13.5159	2.21097	2.31026	-5.96791	10.5884	-0.147695	-8.66623	8.37084	1.66515	-6.36983	9.70013
-23	-5.43104	-13.1258	2.26376	4.57202	-3.15885	12.3029	-1.21691	-9.67977	7.24595	2.47453	-5.85463	10.8037
-22	-5.00426	-12.8821	2.87359	6.28793	-0.872642	13.4485	-1.7949	-10.0381	6.44828	2.43481	-5.93913	10.8088
-21	-4.3929	-12.9049	4.11907	7.58561	0.52902	14.6422	-2.3611	-10.3233	5.60108	1.94304	-6.31166	10.1977
-20	-3.60248	-13.0119	5.80698	8.18661	0.550876	15.8223	-2.88492	-10.6253	4.8555	1.22776	-6.79114	9.24666
-19	-2.51164	-12.7823	7.75907	7.8592	-0.816136	16.5345	-3.56885	-11.2083	4.07062	0.797835	-7.02791	8.62358
-18	-1.36801	-12.1428	9.40673	6.75033	-2.92621	16.4269	-4.22603	-11.8944	3.44236	0.482588	-7.27474	8.23992
-17	-0.325286	-11.1288	10.4782	4.95878	-5.35246	15.27	-5.09631	-12.879	2.68633	0.424039	-7.42539	8.27347
-16	0.22959	-10.1918	10.651	2.84822	-7.65585	13.3523	-6.54024	-14.477	1.39653	0.884916	-7.18467	8.9545
-15	0.225978	-9.53426	9.98622	0.37708	-9.84839	10.6025	-7.93132	-15.9844	0.121707	1.50944	-6.77152	9.7904
-14	-0.280679	-9.3519	8.79054	-2.14855	-11.718	7.42094	-9.22794	-17.2744	-1.18147	1.90311	-6.44268	10.2489
-13	-1.40567	-10.0162	7.20488	-4.09201	-12.8872	4.70319	-10.3745	-18.3117	-2.43727	1.8486	-6.39046	10.0877
-12	-2.89548	-11.3729	5.58196	-5.44013	-13.5998	2.71953	-11.223	-18.9939	-3.45205	1.41619	-6.61204	9.44441
-11	-4.25256	-12.914	4.40889	-6.07309	-13.9214	1.7752	-11.2401	-18.8804	-3.59978	0.289016	-7.44386	8.02189
-10	-5.53818	-14.5302	3.45383	-5.74087	-13.5905	2.10878	-10.3703	-18.0157	-2.72484	-1.37637	-8.91793	6.16519
-9	-6.20932	-15.526	3.10736	-4.79165	-12.792	3.20874	-8.68391	-16.4662	-0.901571	-3.21543	-10.7157	4.28481
-8	-6.27702	-15.8063	3.25227	-3.28231	-11.4613	4.89668	-6.30469	-14.2331	1.62376	-5.23187	-12.8267	2.363
-7	-5.89102	-15.4749	3.69291	-1.39501	-9.75574	6.96573	-3.25904	-11.256	4.73793	-7.15407	-14.9187	0.610556
-6	-5.41883	-14.8212	3.98353	0.512069	-8.13853	9.16266	0.129062	-7.77202	8.03015	-8.51552	-16.4141	-0.616958
-5	-4.65862	-13.714	4.39679	1.92637	-7.10615	10.9589	3.55329	-4.19189	11.2985	-9.18792	-17.1589	-1.21698
-4	-3.74214	-12.3747	4.89039	3.03709	-6.40425	12.4784	6.61748	-1.04402	14.279	-9.1075	-17.1176	-1.09739
-3	-3.0438	-11.3085	5.22086	3.50667	-6.13136	13.1447	8.77779	1.0736	16.482	-8.20621	-16.2116	-0.200845
-2	-2.51629	-10.5881	5.55555	3.25522	-6.24835	12.7588	9.9104	2.02774	17.7931	-6.52452	-14.4665	1.41743
-1	-1.95432	-9.99197	6.08333	2.2191	-6.72611	11.1643	9.71371	1.57033	17.8571	-4.16995	-12.1038	3.76391
0	-1.48645	-9.61538	6.64248	0.761229	-7.37914	8.9016	8.50535	0.164266	16.8464	-1.5434	-9.49186	6.40505
1	-0.723002	-8.94324	7.49723	-0.908387	-8.36735	6.55058	6.12668	-2.30033	14.5537	1.22354	-6.7888	9.23588
2	0.38436	-7.9471	8.71582	-2.80815	-10.1202	4.50394	3.15733	-5.16263	11.4773	3.72829	-4.39517	11.8517
3	1.42937	-7.08046	9.93921	-4.2833	-12.0516	3.48501	-0.179897	-8.26793	7.90814	6.01423	-2.23089	14.2593
4	2.31118	-6.46698	11.0893	-4.91008	-13.4479	3.62773	-3.45051	-11.2641	4.36311	7.41412	-0.883046	15.7113
5	2.6502	-6.55318	11.8536	-4.68603	-13.9373	4.56526	-6.33442	-13.9638	1.29498	7.96416	-0.317804	16.2461
6	2.33097	-7.35865	12.0206	-3.95991	-13.5876	5.66782	-8.75871	-16.4367	-1.08069	7.81974	-0.367326	16.0068
7	1.34278	-8.71238	11.3979	-2.66998	-12.2927	6.95269	-10.0812	-18.0497	-2.11263	6.60715	-1.46468	14.679
8	-0.355526	-10.4694	9.75832	-0.935142	-10.1668	8.29653	-10.6322	-18.9663	-2.29809	4.85797	-3.08716	12.8031
9	-2.57778	-12.3969	7.24133	1.03701	-7.6907	9.76473	-10.3841	-18.9386	-1.82961	2.76465	-5.03697	10.5663
10	-4.59274	-13.8431	4.65767	2.83359	-5.48077	11.148	-9.50384	-18.0318	-0.9759	0.686863	-6.9847	8.35842
11	-5.93338	-14.5614	2.69462	4.23426	-3.97239	12.4409	-7.77979	-16.0334	0.473859	-1.36053	-8.97491	6.25384
12	-6.51035	-14.7906	1.76993	5.0313	-3.43817	13.5008	-5.32389	-13.2421	2.59433	-3.01096	-10.7085	4.68657
13	-6.21011	-14.6018	2.1816	5.26396	-3.68843	14.2164	-2.5285	-10.3337	5.27671	-3.97271	-11.9373	3.99193
14	-5.00785	-13.865	3.84933	4.85477	-4.5794	14.289	0.268315	-7.73571	8.27234	-4.22541	-12.5509	4.1001
15	-3.33671	-12.7211	6.04764	3.93113	-5.80477	13.667	2.82446	-5.58137	11.2303	-3.87034	-12.5127	4.772
16	-1.58756	-11.3123	8.1372	2.79306	-7.01869	12.6048	4.71639	-4.04262	13.4754	-3.09982	-11.93	5.73038
17	-0.336472	-10.1064	9.43345	1.65061	-8.11697	11.4182	5.64899	-3.23346	14.5315	-1.82597	-10.6355	6.98354
18	0.419535	-9.16445	10.0035	0.362973	-9.30968	10.0356	5.4459	-3.31481	14.2066	-0.135367	-8.76889	8.49816
19	0.0357275	-9.25717	9.32862	-0.507667	-10.116	9.10067	3.89057	-4.66765	12.4488	1.84374	-6.55481	10.2423
20	-1.10939	-10.1222	7.90343	-1.13265	-10.6983	8.43299	1.23444	-7.19346	9.66234	3.91567	-4.32228	12.1536
21	-2.88953	-11.7158	5.93669	-1.43703	-10.9444	8.0703	-2.2081	-10.6206	6.20443	5.93675	-2.25317	14.1267
22	-5.03396	-13.7286	3.66073	-1.22009	-10.605	8.1648	-5.79655	-14.2574	2.66426	7.69461	-0.506324	15.8956
23	-7.13675	-15.6716	1.39807	-0.536618	-9.72287	8.64964	-8.82672	-17.2857	-0.367787	8.80447	0.534027	17.0749
24	-8.89284	-17.278	-0.507712	0.310792	-8.72418	9.34577	-11.1859	-19.5379	-2.83393	9.21339	0.849477	17.5773
25	-9.7903	-18.113	-1.46763	1.06964	-7.88014	10.0194	-11.9902	-20.1836	-3.79677	8.42521	-0.0614205	16.9118
26	-10.0604	-18.4305	-1.69022	2.15376	-6.81514	11.1227	-11.5467	-19.6186	-3.47488	6.72919	-1.80845	15.2668
27	-9.65014	-18.1101	-1.19016	3.07789	-5.97946	12.1352	-9.69881	-17.6898	-1.70785	4.13107	-4.42766	12.6898
28	-8.36065	-16.8095	0.0882398	3.71038	-5.4167	12.8375	-6.78585	-14.7595	1.1878	0.82818	-7.78265	9.43901
29	-6.56717	-14.8486	1.71429	4.24425	-4.90725	13.3957	-3.34537	-11.2309	4.54012	-2.74687	-11.3566	5.86282
30	-4.3139	-12.3693	3.74146	4.5967	-4.53837	13.7318	-0.101725	-7.84955	7.6461	-5.83765	-14.4087	2.73341
31	-1.52865	-9.43976	6.38247	4.60219	-4.53336	13.7377	2.33613	-5.29833	9.97059	-8.00587	-16.5547	0.542946
32	1.16055	-6.86658	9.18767	4.49149	-4.74247	13.7255	3.74715	-3.88463	11.3789	-8.94349	-17.5251	-0.361921
33	3.52377	-4.89009	11.9376	4.41368	-5.05134	13.8787	4.0712	-3.74257	11.885	-8.59874	-17.3377	0.140197
34	5.44347	-3.42062	14.3076	4.32464	-5.41884	14.0681	3.18984	-4.89665	11.2763	-6.75959	-15.775	2.25578
35	6.52251	-2.7152	15.7602	4.0189	-5.90711	13.9449	1.40189	-6.92342	9.7272	-3.79089	-13.1165	5.53471
36	6.98748	-2.34076	16.3157	3.61758	-6.20902	13.4442	-0.598392	-8.96867	7.77189	-0.453968	-9.92686	9.01892
37	6.51108	-2.62231	15.6445	3.25817	-6.14904	12.6654	-2.73708	-10.913	5.43888	3.05695	-6.31071	12.4246
38	5.23815	-3.4852	13.9615	2.85712	-5.90052	11.6148	-4.62204	-12.4304	3.18636	6.01569	-2.93869	14.9701
39	3.48426	-4.78194	11.7505	2.14947	-6.00563	10.3046	-6.34194	-13.7621	1.07816	8.17684	-0.22179	16.5755
40	1.61753	-6.27272	9.50779	1.34095	-6.51209	9.194	-7.47157	-14.6917	-0.251491	9.11574	1.1479	17.0836
41	-0.170636	-7.82556	7.48429	0.216459	-7.77812	8.21104	-7.90388	-15.2043	-0.603442	8.67828	0.780439	16.5761
42	-1.60264	-9.1502	5.94492	-0.855537	-9.25154	7.54047	-7.69573	-15.3351	-0.0563958	7.03891	-1.17003	15.2479
43	-2.53446	-10.0493	4.98041	-1.7487	-10.5423	7.04487	-7.20701	-15.2865	0.872498	4.63726	-4.03101	13.3055
44	-2.8484	-10.4539	4.7571	-2.44501	-11.48	6.58996	-6.3088	-14.7095	2.09189	1.72775	-7.29983	10.7553
45	-2.78038	-10.6062	5.0454	-2.82016	-11.8445	6.20418	-5.12889	-13.6153	3.3575	-1.26495	-10.358	7.82812
46	-2.51648	-10.6427	5.60969	-2.70274	-11.5666	6.16108	-3.95033	-12.2554	4.35474	-3.75147	-12.5601	5.0572
47	-1.79728	-10.267	6.67242	-2.57054	-11.2305	6.08947	-3.00191	-10.9915	4.98768	-5.29447	-13.6966	3.10762
48	-1.08427	-9.76073	7.5922	-2.33186	-10.8239	6.16018	-2.55632	-10.2424	5.12974	-5.40185	-13.4329	2.6292
49	-0.622751	-9.33638	8.09087	-1.92144	-10.3144	6.47154	-2.85321	-10.4203	4.71389	-4.14432	-12.0193	3.73069
50	-0.289027	-8.90158	8.32352	-1.51219	-10.0011	6.97669	-4.033	-11.7386	3.67258	-1.43021	-9.37318	6.51275
51	-0.0835971	-8.51577	8.34858	-1.05082	-9.84249	7.74085	-5.86322	-13.891	2.16454	2.31468	-5.78365	10.413
52	-0.0100256	-8.30185	8.2818	-0.361286	-9.5323	8.80973	-7.99657	-16.3733	0.380159	6.53685	-1.7092	14.7829
53	-0.32896	-8.58497	7.92705	0.510401	-8.9845	10.0053	-10.3764	-19.0197	-1.73309	10.8192	2.51467	19.1238
54	-1.03696	-9.33486	7.26093	1.24784	-8.46665	10.9623	-12.3433	-21.0647	-3.6219	14.2937	6.0062	22.5813
55	-2.30558	-10.6641	6.05296	2.30813	-7.44122	12.0575	-13.7211	-22.2886	-5.15365	16.6282	8.33752	24.9188
56	-4.01475	-12.4116	4.38209	3.53613	-6.08206	13.1543	-13.8138	-22.0782	-5.54945	17.5421	9.09651	25.9877
57	-6.11772	-14.5735	2.3381	4.62786	-4.80406	14.0598	-12.4875	-20.3566	-4.61841	16.763	8.17657	25.3495
58	-8.10693	-16.6378	0.423945	5.39009	-3.9269	14.7071	-9.81353	-17.339	-2.28802	14.47	5.82599	23.114
59	-9.99387	-18.6542	-1.33359	5.69823	-3.57452	14.971	-6.04463	-13.4	1.3107	11.2164	2.65632	19.7765
60	-11.1813	-20.0207	-2.34188	5.34328	-3.87743	14.564	-1.55756	-8.94669	5.83157	7.47265	-0.818025	15.7633
61	-11.5242	-20.4839	-2.56451	4.20055	-4.86334	13.2644	2.92677	-4.62373	10.4773	3.97001	-3.95305	11.8931
62	-10.8631	-19.9186	-1.80763	2.52014	-6.3878	11.4281	7.05275	-0.689122	14.7946	0.991596	-6.68625	8.66944
63	-9.01589	-18.1276	0.0958489	0.341256	-8.52203	9.20454	10.0725	2.20669	17.9383	-1.08029	-8.83949	6.67892
64	-6.63142	-15.7939	2.53107	-2.06993	-11.1958	7.05589	11.6014	3.66726	19.5355	-2.03695	-10.2374	6.16351
65	-3.72086	-13.011	5.5693	-4.49348	-14.1533	5.16635	11.8538	3.90174	19.8059	-2.15836	-10.9359	6.61916
66	-1.10955	-10.5228	8.30369	-6.31009	-16.5363	3.9161	10.8022	2.87885	18.7256	-1.41066	-10.6376	7.81631
67	0.993503	-8.50081	10.4878	-7.70696	-18.3707	2.95673	8.91926	1.03348	16.805	-0.482116	-9.92665	8.96241
68	2.41759	-7.04517	11.8803	-8.58211	-19.2912	2.12702	6.52631	-1.31329	14.3659	0.497134	-8.86708	9.86135
69	2.63326	-6.64631	11.9128	-8.62264	-19.0082	1.76296	4.32668	-3.42666	12.08	1.46499	-7.58601	10.516
70	1.65564	-7.36061	10.6719	-7.98764	-17.8414	1.86616	2.87825	-4.74766	10.5042	2.01903	-6.66082	10.6989
71	0.0747814	-8.77255	8.92211	-6.89385	-16.3453	2.55754	2.16702	-5.35647	9.69052	2.08653	-6.27345	10.4465
72	-1.92389	-10.8484	7.00062	-5.37069	-14.8276	4.08625	2.10873	-5.36566	9.58313	1.88211	-6.27605	10.0403
73	-3.89487	-13.0487	5.25897	-3.86611	-13.61	5.87781	2.56697	-4.9612	10.0951	1.4913	-6.5767	9.55931
74	-5.62717	-15.0093	3.75495	-2.53923	-12.6312	7.55269	3.37905	-4.33614	11.0942	1.01715	-7.02192	9.05621
75	-6.93471	-16.4165	2.54704	-1.1773	-11.4211	9.06649	4.09909	-3.86737	12.0655	0.660155	-7.43244	8.75275
76	-7.84557	-17.2414	1.55022	0.0338553	-10.077	10.1447	4.17561	-4.00852	12.3597	0.745858	-7.35247	8.84419
77	-8.23324	-17.4002	0.933693	0.932256	-8.83009	10.6946	3.44661	-4.78336	11.6766	1.35936	-6.64929	9.36801
78	-8.44667	-17.351	0.457679	1.52318	-7.85906	10.9054	1.8585	-6.29511	10.0121	2.2006	-5.7082	10.1094
79	-8.65978	-17.3934	0.073852	2.01191	-7.09463	11.1184	-0.607067	-8.59067	7.37654	3.37535	-4.46573	11.2164
80	-8.42881	-17.1568	0.299215	2.09112	-6.87162	11.0539	-3.56736	-11.3623	4.22758	4.48004	-3.33061	12.2907
81	-8.09981	-16.9245	0.724877	1.79596	-7.12673	10.7187	-6.57828	-14.2816	1.12504	5.32904	-2.55808	13.2162
82	-7.7104	-16.7329	1.31208	1.3692	-7.58946	10.3279	-9.15547	-16.909	-1.4019	5.75759	-2.2452	13.7604
83	-6.91713	-16.1329	2.2986	0.619219	-8.49396	9.7324	-11.0978	-18.9848	-3.21086	5.60509	-2.48437	13.6945
84	-5.77327	-15.1186	3.57202	-0.0819358	-9.41309	9.24922	-12.1348	-20.1228	-4.14684	4.89345	-3.21291	12.9998
85	-4.41116	-13.7408	4.91843	-0.321838	-9.78327	9.1396	-11.9008	-19.8786	-3.92297	3.73382	-4.28232	11.75
86	-3.2571	-12.417	5.9028	0.011533	-9.42435	9.44741	-10.6994	-18.5167	-2.88216	2.4197	-5.40492	10.2443
87	-1.91851	-10.8074	6.97037	0.757708	-8.47434	9.98976	-8.58087	-16.1222	-1.03951	1.00889	-6.54535	8.56312
88	-0.816592	-9.45522	7.82203	1.80147	-7.13586	10.7388	-5.80749	-13.0823	1.46736	-0.227857	-7.54955	7.09384
89	-0.255468	-8.84274	8.3318	3.02079	-5.76092	11.8025	-2.86962	-9.99046	4.25123	-1.19471	-8.35295	5.96353
90	0.0390278	-8.68905	8.7671	3.83385	-5.08127	12.749	-0.170447	-7.31593	6.97504	-1.61016	-8.78369	5.56338
91	0.234693	-8.74093	9.21032	4.042	-5.37117	13.4552	2.14219	-5.19763	9.48201	-1.82723	-9.26456	5.6101
92	0.626889	-8.52886	9.78264	3.33803	-6.73849	13.4145	3.85359	-3.72219	11.4294	-2.07454	-9.85007	5.701
93	1.16378	-7.96571	10.2933	1.79203	-8.84628	12.4303	4.84826	-2.91045	12.607	-2.374	-10.4407	5.69266
94	1.82738	-7.01932	10.6741	-0.577199	-11.439	10.2846	5.14626	-2.66048	12.953	-2.92837	-11.1509	5.29413
95	2.68837	-5.7068	11.0836	-3.11794	-13.7311	7.49521	4.8701	-2.88019	12.6204	-3.67872	-11.9173	4.55989
96	3.59866	-4.35523	11.5526	-5.5705	-15.5718	4.43084	4.05801	-3.58977	11.7058	-4.77848	-12.9502	3.39324
97	4.45896	-3.32715	12.2451	-7.32947	-16.6757	2.01677	2.94846	-4.67957	10.5765	-6.07807	-14.2347	2.07852
98	4.62227	-3.28448	12.529	-7.81697	-16.7605	1.12655	1.74221	-6.0288	9.51322	-7.16412	-15.4737	1.1455
99	3.94071	-4.31235	12.1938	-6.91131	-15.9789	2.15627	0.967891	-7.04623	8.98201	-7.92826	-16.4696	0.613061
100	2.43106	-6.17605	11.0382	-4.8696	-14.4476	4.70843	0.516116	-7.72277	8.755	-8.39157	-17.1403	0.357115
101	0.316827	-8.45014	9.0838	-2.04706	-12.2088	8.11471	0.431308	-7.89606	8.75868	-8.52611	-17.3964	0.344137
102	-2.12131	-10.8987	6.65607	0.780768	-9.84701	11.4085	0.609054	-7.62615	8.84426	-8.17352	-17.0152	0.668174
103	-4.56776	-13.3026	4.16707	3.08855	-7.66778	13.8449	0.999705	-6.95971	8.95912	-7.50585	-16.1673	1.15557
104	-6.50829	-15.2531	2.23656	4.56708	-6.00708	15.1412	1.54287	-6.09669	9.18244	-6.82852	-15.2507	1.59364
105	-7.88839	-16.7079	0.931155	5.02712	-5.16503	15.2193	1.69879	-5.71312	9.11071	-6.00812	-14.2185	2.20225
106	-8.35502	-17.3165	0.606423	4.26336	-5.56024	14.087	1.46603	-5.93627	8.86833	-5.26009	-13.486	2.96583
107	-7.79338	-16.8567	1.26996	2.35689	-7.18882	11.9026	1.09366	-6.54839	8.73571	-5.07662	-13.5684	3.41516
108	-6.95402	-15.9831	2.07502	0.0910356	-9.23878	9.42085	0.506282	-7.44079	8.45336	-5.24727	-14.173	3.6785
109	-5.81931	-14.6898	3.05113	-2.01564	-11.3244	7.2931	0.150053	-7.99826	8.29837	-6.01627	-15.3698	3.33721
110	-4.86074	-13.5369	3.81544	-3.78067	-13.2427	5.68133	0.0808435	-8.10399	8.26568	-7.1623	-16.7817	2.45712
111	-4.18336	-12.7753	4.40862	-4.88699	-14.6575	4.88353	0.683227	-7.351	8.71746	-8.78768	-18.3606	0.785227
112	-3.92669	-12.6325	4.77912	-5.35602	-15.4585	4.74646	1.77039	-6.00608	9.54686	-10.666	-19.942	-1.38992
113	-3.76347	-12.7462	5.21925	-5.354	-15.6372	4.92917	3.25879	-4.36596	10.8835	-12.3812	-21.2771	-3.48527
114	-3.46778	-12.7486	5.81307	-4.93707	-15.1102	5.23605	4.89214	-2.79286	12.5771	-13.7025	-22.3763	-5.02872
115	-3.31577	-12.7445	6.11297	-4.12095	-13.9222	5.68025	6.13254	-1.78294	14.048	-14.1203	-22.8814	-5.35932
116	-2.92896	-12.2163	6.35842	-3.31108	-12.6739	6.0517	6.72052	-1.44754	14.8886	-13.593	-22.6829	-4.50305
117	-2.11482	-10.982	6.75231	-2.60754	-11.626	6.41092	6.63235	-1.70345	14.9682	-11.8292	-21.3265	-2.33188
118	-1.42932	-9.80595	6.94731	-1.69995	-10.6585	7.25856	5.55453	-2.78807	13.8971	-9.028	-18.7475	0.691521
119	-0.665318	-8.72057	7.38994	-0.584028	-9.71543	8.54737	3.67048	-4.52039	11.8614	-5.38662	-15.0767	4.30347
120	-0.159655	-8.22341	7.9041	0.660688	-8.70483	10.0262	1.37787	-6.61687	9.37261	-1.46978	-10.9315	7.9919
121	-0.0202182	-8.39596	8.35553	1.90436	-7.65675	11.4655	-0.561995	-8.34638	7.22239	1.81047	-7.32246	10.9434
122	-0.295881	-9.09511	8.50334	3.12333	-6.58252	12.8292	-1.74338	-9.43646	5.9497	3.84663	-5.05514	12.7484
123	-1.0246	-10.1988	8.14964	3.9851	-5.89835	13.8685	-2.07074	-9.7958	5.65433	4.32629	-4.50452	13.1571
124	-2.22072	-11.5965	7.15507	4.24404	-5.84327	14.3313	-1.63518	-9.43768	6.16733	3.07723	-5.7664	11.9209
125	-3.43877	-12.8506	5.97301	4.00873	-6.3349	14.3524	-0.658832	-8.59127	7.27361	0.227293	-8.69604	9.15062
126	-4.53745	-13.9421	4.86722	3.11657	-7.45027	13.6834	0.443645	-7.58902	8.47631	-3.60019	-12.6206	5.4202
127	-5.39681	-14.7277	3.93411	1.87315	-8.72236	12.4687	0.840609	-7.1913	8.87252	-7.47211	-16.6074	1.66313
128	-5.67257	-14.8437	3.49854	0.245588	-10.1305	10.6217	0.348789	-7.54162	8.2392	-10.7566	-19.9531	-1.56005
129	-5.62629	-14.5182	3.26562	-0.966644	-10.9066	8.97335	-1.36913	-9.01177	6.27351	-12.729	-21.886	-3.57194
130	-5.04621	-13.662	3.56955	-1.81154	-11.2649	7.64183	-4.2588	-11.7505	3.23286	-13.0973	-22.1001	-4.09459
131	-3.99292	-12.3892	4.40332	-2.19727	-11.3008	6.90625	-7.69882	-15.2168	-0.180792	-11.7193	-20.3975	-3.04117
132	-2.7729	-11.1611	5.61532	-1.95619	-11.0395	7.12715	-11.2893	-19.0064	-3.57218	-9.0449	-17.2912	-0.798621
133	-1.39978	-10.011	7.21149	-1.07652	-10.4928	8.33979	-14.2546	-22.2879	-6.22132	-5.61112	-13.4302	2.20791
134	-0.282972	-9.22687	8.66093	0.169155	-9.74672	10.085	-16.1283	-24.3811	-7.87547	-2.18777	-9.67355	5.29801
135	0.612104	-8.67606	9.90026	1.54851	-8.84637	11.9434	-16.5662	-24.804	-8.32845	0.562699	-6.69344	7.81884
136	1.14621	-8.38951	10.6819	2.79626	-7.95524	13.5478	-15.4158	-23.4379	-7.39376	2.05577	-5.0906	9.20213
137	1.1209	-8.594	10.8358	3.78642	-7.08806	14.6609	-13.0847	-20.8043	-5.36512	2.29529	-4.84736	9.43794
138	0.497065	-9.32255	10.3167	4.66215	-6.04123	15.3655	-9.86352	-17.3656	-2.36142	1.21284	-6.04195	8.46764
139	-0.556769	-10.3874	9.27382	5.14386	-5.12869	15.4164	-6.35122	-13.8286	1.12615	-0.654271	-8.17438	6.86584
140	-1.58332	-11.2506	8.08392	5.09711	-4.56213	14.7563	-2.7087	-10.3251	4.90774	-3.07465	-10.9104	4.76106
141	-2.81607	-12.18	6.54785	5.03522	-4.06868	14.1391	0.363432	-7.48769	8.21455	-5.36766	-13.5071	2.77175
142	-4.01766	-13.0392	5.00384	4.92598	-3.98594	13.8379	2.81717	-5.29168	10.926	-7.21313	-15.5243	1.09805
143	-4.58679	-13.3319	4.15829	4.69658	-4.48458	13.8777	4.6348	-3.62727	12.8969	-8.13202	-16.4056	0.141529
144	-4.93126	-13.5523	3.6898	4.48325	-5.19114	14.1576	5.73276	-2.5347	14.0002	-8.39924	-16.4348	-0.363726
145	-4.95226	-13.6452	3.74064	4.1326	-5.96644	14.2316	6.17808	-1.94598	14.3021	-8.17797	-15.8551	-0.500837
146	-4.30401	-13.1299	4.52188	3.30564	-6.89434	13.5056	6.02802	-1.84777	13.9038	-7.36853	-14.6958	-0.0412395
147	-3.37071	-12.2792	5.53783	2.09945	-7.85374	12.0526	5.32457	-2.28599	12.9351	-6.3323	-13.4104	0.745832
148	-2.149	-11.0168	6.71876	0.666014	-8.86262	10.1946	3.86972	-3.56055	11.3	-5.19123	-12.2113	1.82885
149	-1.22968	-9.99031	7.53096	-0.870489	-10.0147	8.27368	1.78501	-5.64558	9.2156	-3.90908	-11.0128	3.19467
150	-0.709665	-9.37713	7.9578	-2.51095	-11.4102	6.38827	-0.57142	-8.21676	7.07392	-2.80164	-10.1029	4.49958
151	-0.631811	-9.39166	8.12804	-4.19937	-13.0447	4.646	-3.00337	-11.0026	4.99591	-1.84583	-9.36533	5.67367
152	-0.585549	-9.64164	8.47055	-5.57406	-14.508	3.35988	-5.44205	-13.7439	2.85976	-0.727728	-8.45553	7.00007
153	-0.878223	-10.355	8.59857	-6.66537	-15.8101	2.47937	-7.61523	-16.1022	0.871777	0.377422	-7.5488	8.30364
154	-1.20306	-10.9658	8.55964	-7.30596	-16.6648	2.05293	-9.06604	-17.4829	-0.649186	1.29836	-6.70347	9.30019
155	-1.44338	-11.2427	8.3559	-7.62874	-17.0926	1.83515	-9.46786	-17.5608	-1.37496	1.91034	-6.08634	9.90703
156	-1.45688	-11.0193	8.10556	-7.61951	-17.0437	1.80466	-8.8929	-16.4976	-1.28816	2.14786	-5.76423	10.0599
157	-1.21824	-10.3438	7.90735	-7.56752	-16.7547	1.61967	-7.35948	-14.5147	-0.204266	1.76295	-5.97323	9.49913
158	-0.978826	-9.61522	7.65757	-7.10782	-15.829	1.6134	-5.32276	-12.2931	1.64762	1.03064	-6.53054	8.59182
159	-0.863796	-9.15357	7.42598	-6.27068	-14.48	1.9386	-3.13948	-10.2834	4.00446	-0.0828772	-7.49812	7.33236
160	-0.530503	-8.74329	7.68228	-5.19849	-13.0362	2.63924	-0.901015	-8.48142	6.67939	-1.32284	-8.67419	6.02851
161	-0.338531	-8.6743	7.99724	-3.9182	-11.7145	3.87813	0.853812	-7.20585	8.91347	-2.56611	-9.97728	4.84505
162	0.0867347	-8.42104	8.59451	-2.43929	-10.4846	5.60606	1.80511	-6.59555	10.2058	-3.29218	-10.8542	4.2698
163	0.462664	-8.12817	9.0535	-1.21317	-9.66175	7.23542	2.23902	-6.27458	10.7526	-3.41159	-11.1875	4.36433
164	0.948139	-7.58941	9.48569	-0.371393	-9.22877	8.48599	2.08185	-6.33087	10.4946	-2.91109	-10.8576	5.03541
165	1.4978	-6.88844	9.88403	0.0248315	-9.12801	9.17767	1.64976	-6.56334	9.86286	-1.88987	-9.97198	6.19224
166	1.97527	-6.21636	10.1669	0.0653066	-9.19921	9.32983	1.06271	-6.96112	9.08653	-0.549624	-8.69888	7.59963
167	1.83607	-6.25294	9.92508	0.0115432	-9.21617	9.23926	0.24146	-7.70841	8.19133	0.850669	-7.32146	9.0228
168	1.48341	-6.64122	9.60804	-0.356625	-9.42627	8.71302	-0.636661	-8.63379	7.36047	2.09666	-6.07882	10.2721
169	0.951527	-7.36369	9.26674	-0.900209	-9.73831	7.93789	-1.36087	-9.4497	6.72796	2.88209	-5.2238	10.988
170	-0.0986723	-8.68166	8.48432	-0.859785	-9.4587	7.73913	-2.37873	-10.5355	5.77798	3.20876	-4.72079	11.1383
171	-1.72828	-10.5512	7.09461	-0.208779	-8.69541	8.27785	-3.55026	-11.7098	4.60924	2.92996	-4.81637	10.6763
172	-3.21384	-12.2049	5.77726	0.773754	-7.88343	9.43094	-4.60965	-12.7019	3.48258	2.40422	-5.23584	10.0443
173	-4.55353	-13.5915	4.48447	1.75997	-7.29757	10.8175	-5.59047	-13.5634	2.38251	1.57167	-6.18282	9.32616
174	-5.65221	-14.5811	3.27664	2.92738	-6.59281	12.4476	-6.41087	-14.2675	1.44571	0.899286	-7.13852	8.93709
175	-6.13671	-14.8597	2.58629	3.84962	-5.99205	13.6913	-6.91039	-14.6649	0.844071	0.621473	-7.73351	8.97645
176	-6.10606	-14.4974	2.28524	4.40895	-5.39231	14.2102	-6.84879	-14.5206	0.822997	0.779932	-7.75916	9.31903
177	-5.56832	-13.5851	2.44843	4.47713	-5.00999	13.9643	-6.35451	-13.99	1.28096	1.52704	-6.96854	10.0226
178	-4.80425	-12.5402	2.93166	4.30375	-4.6996	13.3071	-5.43219	-13.0832	2.21884	2.82536	-5.39495	11.0457
179	-3.99102	-11.6582	3.67614	3.80734	-4.78783	12.4025	-4.13123	-11.8291	3.56663	4.28999	-3.58885	12.1688
180	-3.29822	-11.152	4.55554	2.92386	-5.55927	11.407	-2.75474	-10.5176	5.0081	5.80126	-1.8522	13.4547
181	-2.56409	-10.7707	5.64249	2.03505	-6.63141	10.7015	-1.69396	-9.47859	6.09068	7.29992	-0.33944	14.9393
182	-2.07983	-10.6425	6.48283	1.36488	-7.65354	10.3833	-1.06148	-8.81475	6.6918	8.33794	0.495023	16.1808
183	-1.80013	-10.5146	6.91438	0.826485	-8.46265	10.1156	-0.978926	-8.69703	6.73918	8.81516	0.674944	16.9554
184	-1.43732	-10.0958	7.22114	0.298188	-9.1332	9.72957	-1.30262	-8.99845	6.39321	8.62225	0.184694	17.0598
185	-1.17287	-9.64859	7.30285	-0.150868	-9.50555	9.20381	-1.96782	-9.66217	5.72653	7.86328	-0.766467	16.493
186	-0.721081	-9.0607	7.61854	-0.649173	-9.77413	8.47578	-2.71459	-10.433	5.00379	6.57559	-2.11422	15.2654
187	-0.19519	-8.62038	8.23	-1.16491	-9.98868	7.65886	-3.59138	-11.2935	4.11074	5.20161	-3.39123	13.7945
188	0.169975	-8.54116	8.8811	-1.4344	-10.0993	7.23051	-4.3167	-11.9704	3.33702	3.93668	-4.4673	12.3406
189	0.444099	-8.57921	9.46741	-1.5703	-10.2141	7.07348	-4.44781	-12.0935	3.19789	2.85801	-5.35166	11.0677
190	0.487128	-8.71003	9.68429	-1.52967	-10.2568	7.19749	-4.07354	-11.8082	3.66111	2.00915	-6.06508	10.0834
191	0.232002	-8.96067	9.42467	-1.26981	-10.0824	7.54273	-3.28221	-11.2525	4.68803	1.43986	-6.59157	9.47129
192	-0.215706	-9.28072	8.84931	-1.04102	-9.93845	7.85641	-1.97261	-10.2721	6.32691	1.16504	-6.9284	9.25849
193	-0.733512	-9.67938	8.21236	-1.03313	-10.1383	8.07204	-0.663183	-9.24969	7.92332	1.02597	-7.22468	9.27662
194	-1.29358	-10.1903	7.6031	-1.13238	-10.668	8.40324	0.785423	-7.87864	9.44949	0.8277	-7.53108	9.18648
195	-1.50449	-10.4026	7.39364	-1.7431	-11.9064	8.42023	2.16881	-6.28084	10.6185	0.398461	-7.96588	8.7628
196	-1.60915	-10.5622	7.34386	-2.94447	-13.7731	7.88418	2.96441	-5.03514	10.964	0.0230819	-8.28876	8.33492
197	-1.47183	-10.3641	7.42041	-4.80161	-16.0065	6.40332	3.01747	-4.46905	10.504	-0.0612683	-8.29394	8.17141
198	-1.22541	-9.92295	7.47213	-6.91592	-17.9402	4.10833	2.60981	-4.57925	9.79887	0.0663704	-8.2046	8.33734
199	-1.03247	-9.46883	7.40389	-8.88867	-19.151	1.37362	1.50811	-5.77816	8.79438	0.367829	-8.04043	8.77608
200	-1.21514	-9.43682	7.00654	-10.2407	-19.3775	-1.10386	-0.150408	-7.86871	7.56789	0.936819	-7.65127	9.52491

## Sheet: Panel_E
time	vEyeVelBlack_Mean	vEyeVelBlack_95ci_low	vEyeVelBlack_95ci_up	vEyeVelWhite_Mean	vEyeVelWhite_95ci_low	vEyeVelWhite_95ci_up
-100	4.62227	-1.39934	10.6439	3.0241	-0.919813	6.96801
-99	4.56197	-1.31769	10.4416	4.14976	0.107062	8.19246
-98	4.20441	-1.55426	9.96308	5.05263	0.905618	9.19965
-97	3.64398	-2.02374	9.3117	5.89019	1.7233	10.0571
-96	2.93295	-2.66507	8.53097	6.61009	2.5152	10.705
-95	2.14912	-3.3605	7.65874	6.99532	3.04821	10.9424
-94	1.35603	-4.05724	6.76931	7.11714	3.32181	10.9125
-93	0.435805	-4.88968	5.76129	7.01248	3.29125	10.7337
-92	-0.514286	-5.81894	4.79037	6.63329	2.86021	10.4064
-91	-1.32461	-6.71816	4.06894	5.98553	2.08209	9.88897
-90	-2.07711	-7.66136	3.50713	5.18693	1.14905	9.2248
-89	-2.62912	-8.43209	3.17385	4.30356	0.207337	8.39979
-88	-2.95638	-8.87931	2.96655	3.34831	-0.715706	7.41232
-87	-2.96511	-8.8609	2.93068	2.47743	-1.50572	6.46058
-86	-2.71753	-8.46469	3.02963	1.79149	-2.10679	5.68976
-85	-2.03281	-7.60298	3.53736	1.35562	-2.50256	5.2138
-84	-0.94186	-6.46925	4.58553	1.21229	-2.66481	5.08938
-83	0.473087	-5.18935	6.13552	1.21257	-2.71459	5.13973
-82	2.18609	-3.73773	8.10991	1.35459	-2.6193	5.32847
-81	3.92628	-2.23727	10.0898	1.58152	-2.38398	5.54702
-80	5.62728	-0.62154	11.8761	1.70646	-2.20183	5.61474
-79	7.03291	0.894835	13.171	1.75953	-2.07681	5.59586
-78	7.87748	1.99071	13.7642	1.69216	-2.09769	5.48201
-77	8.16439	2.49896	13.8298	1.48785	-2.3138	5.2895
-76	7.76103	2.15367	13.3684	1.31585	-2.56474	5.19645
-75	6.80731	1.01751	12.5971	1.17049	-2.80882	5.14981
-74	5.3767	-0.714824	11.4682	1.07058	-2.96443	5.10558
-73	3.61235	-2.75358	9.97829	1.10991	-2.91646	5.13628
-72	1.84142	-4.63558	8.31842	1.25428	-2.70473	5.21328
-71	0.194372	-6.19491	6.58365	1.46473	-2.41067	5.34012
-70	-1.25724	-7.42287	4.90838	1.77365	-2.06212	5.60941
-69	-2.24455	-8.19767	3.70858	1.98627	-1.90459	5.87713
-68	-2.69966	-8.61783	3.21852	2.15519	-1.86412	6.1745
-67	-2.66897	-8.79455	3.45662	2.30844	-1.86048	6.47736
-66	-2.23518	-8.72478	4.25443	2.39683	-1.87819	6.67185
-65	-1.37315	-8.18597	5.43967	2.41224	-1.89359	6.71807
-64	-0.243213	-7.1838	6.69738	2.48074	-1.75633	6.71782
-63	1.11905	-5.70563	7.94372	2.62409	-1.50175	6.74993
-62	2.58083	-3.95404	9.1157	2.8099	-1.22098	6.84079
-61	3.97276	-2.27623	10.2218	3.1024	-0.903275	7.10808
-60	5.16532	-0.986672	11.3173	3.37385	-0.662282	7.40998
-59	5.89112	-0.384261	12.1665	3.61448	-0.466558	7.69552
-58	6.05579	-0.456591	12.5682	3.78707	-0.302443	7.87659
-57	5.47062	-1.22243	12.1637	3.85925	-0.169477	7.88798
-56	4.17344	-2.54447	10.8914	3.81471	-0.13051	7.75994
-55	2.25406	-4.33714	8.84525	3.66487	-0.206526	7.53626
-54	-0.089311	-6.46266	6.28404	3.3638	-0.485798	7.21339
-53	-2.43586	-8.58034	3.70861	2.99805	-0.887487	6.88358
-52	-4.53311	-10.4975	1.43123	2.70527	-1.22879	6.63933
-51	-6.04931	-11.9548	-0.143814	2.46144	-1.49803	6.42091
-50	-6.65378	-12.6078	-0.69973	2.29577	-1.63939	6.23093
-49	-6.32102	-12.3976	-0.24444	2.21987	-1.65316	6.09289
-48	-5.1444	-11.365	1.07617	2.22264	-1.58358	6.02886
-47	-3.25289	-9.55196	3.04618	2.32664	-1.43146	6.08474
-46	-0.888818	-7.15485	5.37721	2.49431	-1.24723	6.23584
-45	1.68865	-4.4097	7.787	2.71828	-1.02324	6.45979
-44	4.10648	-1.76479	9.97776	2.99328	-0.752739	6.7393
-43	6.20161	0.511902	11.8913	3.2323	-0.501092	6.96569
-42	7.71261	2.08299	13.3422	3.43656	-0.282841	7.15596
-41	8.66086	2.96926	14.3525	3.57844	-0.151815	7.30869
-40	8.95216	3.11781	14.7865	3.56093	-0.209917	7.33177
-39	8.64945	2.70646	14.5924	3.35121	-0.483709	7.18613
-38	7.86821	1.91326	13.8232	2.98507	-0.906309	6.87646
-37	6.57757	0.685724	12.4694	2.52745	-1.37796	6.43286
-36	5.06003	-0.753426	10.8735	1.97616	-1.87718	5.82949
-35	3.4293	-2.39777	9.25637	1.36964	-2.38912	5.12841
-34	1.856	-4.14612	7.85812	0.858553	-2.81763	4.53473
-33	0.332323	-5.9907	6.65535	0.509154	-3.14369	4.162
-32	-0.919278	-7.56912	5.73057	0.465556	-3.23101	4.16212
-31	-1.6905	-8.57179	5.19079	0.727326	-3.04364	4.49829
-30	-1.99331	-8.912	4.92539	1.25073	-2.57405	5.07551
-29	-1.68185	-8.45698	5.09328	2.04304	-1.78727	5.87336
-28	-0.860469	-7.35883	5.63789	2.96945	-0.827178	6.76608
-27	0.394978	-5.8357	6.62565	3.89715	0.125138	7.66917
-26	1.91009	-4.19709	8.01727	4.64641	0.861039	8.43177
-25	3.47842	-2.7032	9.66004	5.16124	1.33275	8.98973
-24	4.89636	-1.45726	11.25	5.30745	1.43291	9.18199
-23	6.02894	-0.454876	12.5127	5.13563	1.255	9.01627
-22	6.47331	0.0146287	12.932	4.5664	0.721731	8.41107
-21	6.35858	0.0883184	12.6288	3.7135	-0.0713164	7.49831
-20	5.87536	-0.136347	11.8871	2.6192	-1.10782	6.34623
-19	4.99018	-0.860444	10.8408	1.46415	-2.24578	5.17408
-18	4.08755	-1.77802	9.95312	0.32865	-3.40047	4.05777
-17	3.24945	-2.76859	9.26748	-0.673112	-4.41984	3.07362
-16	2.71731	-3.47063	8.90525	-1.48393	-5.21486	2.24699
-15	2.52031	-3.71643	8.75705	-2.03652	-5.70393	1.63089
-14	2.54729	-3.59749	8.69207	-2.34084	-5.90138	1.2197
-13	2.64573	-3.33268	8.62415	-2.29567	-5.75826	1.16691
-12	2.82895	-2.98829	8.64619	-1.9708	-5.37241	1.4308
-11	2.78487	-2.94284	8.51257	-1.37458	-4.78344	2.03429
-10	2.32356	-3.40278	8.04991	-0.594497	-4.05621	2.86722
-9	1.59469	-4.13184	7.32123	0.333406	-3.1903	3.85711
-8	0.580446	-5.11435	6.27524	1.30264	-2.25793	4.86321
-7	-0.58587	-6.19	5.01826	2.26051	-1.3188	5.83982
-6	-1.77135	-7.2833	3.74059	3.07344	-0.522864	6.66975
-5	-2.72453	-8.21552	2.76646	3.72765	0.0947417	7.36056
-4	-3.58447	-9.14171	1.97278	4.19363	0.504679	7.88258
-3	-4.11818	-9.78182	1.54545	4.56933	0.816067	8.32259
-2	-4.17311	-9.93466	1.58844	4.8933	1.10001	8.68658
-1	-3.91731	-9.71172	1.8771	5.14563	1.3361	8.95516
0	-3.34281	-9.09355	2.40794	5.45351	1.6434	9.26361
1	-2.58979	-8.24088	3.0613	5.80307	2.00639	9.59974
2	-1.82066	-7.38105	3.73973	6.19647	2.41398	9.97895
3	-0.842214	-6.36933	4.6849	6.62241	2.84433	10.4005
4	0.201303	-5.3841	5.78671	6.92454	3.13249	10.7166
5	1.32239	-4.36302	7.0078	7.06543	3.23806	10.8928
6	2.40304	-3.38783	8.1939	6.99032	3.11384	10.8668
7	3.28359	-2.57201	9.13919	6.72581	2.8144	10.6372
8	3.95139	-1.91837	9.82115	6.14094	2.22977	10.0521
9	4.44076	-1.42343	10.305	5.43198	1.55078	9.31319
10	4.63858	-1.25235	10.5295	4.683	0.868149	8.49785
11	4.70655	-1.30384	10.7169	3.91366	0.1836	7.64373
12	4.54582	-1.62581	10.7174	3.27244	-0.374329	6.91921
13	4.20369	-2.13118	10.5386	2.8867	-0.687863	6.46125
14	3.90122	-2.55861	10.3611	2.69401	-0.828789	6.21681
15	3.53761	-2.96715	10.0424	2.7374	-0.779078	6.25388
16	3.1895	-3.27491	9.65391	3.02069	-0.551467	6.59286
17	2.96221	-3.37005	9.29447	3.4009	-0.27213	7.07393
18	2.70617	-3.40882	8.82116	3.81126	0.0191564	7.60335
19	2.30747	-3.5479	8.16284	4.11871	0.220047	8.01738
20	1.81624	-3.78815	7.42063	4.29828	0.368405	8.22815
21	1.27191	-4.19636	6.74018	4.20367	0.303374	8.10396
22	0.541006	-4.98725	6.06927	4.03165	0.205519	7.85779
23	-0.326088	-6.08612	5.43394	3.71287	-0.0420497	7.46778
24	-1.07397	-7.13061	4.98267	3.38149	-0.347563	7.11054
25	-1.78235	-8.093	4.5283	3.05857	-0.719562	6.8367
26	-2.34595	-8.76986	4.07796	2.85766	-1.00912	6.72443
27	-2.64117	-9.00049	3.71816	2.71596	-1.22669	6.65861
28	-2.62221	-8.78659	3.54216	2.63227	-1.33024	6.59478
29	-2.27262	-8.19129	3.64604	2.53454	-1.38675	6.45583
30	-1.65398	-7.38259	4.07464	2.34246	-1.50419	6.18911
31	-0.89634	-6.58136	4.78868	1.93983	-1.84664	5.7263
32	0.0928951	-5.6796	5.86539	1.35943	-2.3957	5.11457
33	1.03642	-4.86926	6.94211	0.615417	-3.11681	4.34765
34	1.98887	-4.02153	7.99927	-0.0896719	-3.78297	3.60363
35	2.71145	-3.30292	8.72583	-0.65633	-4.30509	2.99243
36	2.99934	-2.9612	8.95989	-0.84189	-4.46353	2.77975
37	2.95983	-2.91254	8.8322	-0.706919	-4.35547	2.94163
38	2.6598	-3.16123	8.48083	-0.0896795	-3.8343	3.65494
39	2.17361	-3.64208	7.9893	0.970198	-2.89987	4.84026
40	1.59491	-4.2578	7.44763	2.27623	-1.6972	6.24965
41	0.957463	-4.97067	6.8856	3.59261	-0.388267	7.57349
42	0.305756	-5.76314	6.37465	4.78991	0.888068	8.69175
43	-0.198836	-6.44796	6.05029	5.55251	1.77563	9.32939
44	-0.550902	-6.98497	5.88316	5.77492	2.1149	9.43495
45	-0.744661	-7.31419	5.82487	5.33467	1.72256	8.94677
46	-0.757007	-7.36621	5.8522	4.35415	0.703074	8.00523
47	-0.579695	-7.11683	5.95744	3.00606	-0.755586	6.7677
48	-0.422641	-6.86572	6.02044	1.44704	-2.44119	5.33527
49	-0.30006	-6.69159	6.09147	-0.0118698	-4.007	3.98326
50	-0.130485	-6.5512	6.29023	-1.19678	-5.24431	2.85075
51	0.0617858	-6.44013	6.5637	-1.8708	-5.91322	2.17161
52	0.239325	-6.31273	6.79138	-2.02108	-6.02379	1.98163
53	0.433066	-6.07821	6.94434	-1.65947	-5.60703	2.2881
54	0.706359	-5.6706	7.08332	-0.849418	-4.75151	3.05268
55	0.958059	-5.26726	7.18338	0.306454	-3.55229	4.1652
56	1.26717	-4.89842	7.43275	1.66666	-2.12478	5.4581
57	1.78076	-4.42814	7.98965	3.05363	-0.644487	6.75175
58	2.5856	-3.74581	8.91701	4.40236	0.792355	8.01237
59	3.60342	-2.80011	10.0069	5.61176	2.04202	9.18151
60	4.9391	-1.41673	11.2949	6.60362	2.99469	10.2125
61	6.60668	0.461547	12.7518	7.31202	3.5926	11.0314
62	8.40153	2.56648	14.2366	7.88341	4.03614	11.7307
63	10.1756	4.62848	15.7226	8.41929	4.48405	12.3545
64	11.889	6.49695	17.2811	8.94795	4.98142	12.9145
65	13.2519	7.84772	18.6561	9.47756	5.55178	13.4033
66	14.2799	8.71277	19.847	9.99811	6.16391	13.8323
67	15.008	9.25107	20.765	10.5398	6.807	14.2725
68	15.2479	9.3287	21.167	11.0917	7.43566	14.7477
69	15.213	9.21868	21.2072	11.5699	7.9395	15.2004
70	14.9852	8.99132	20.979	11.8588	8.2023	15.5152
71	14.65	8.64844	20.6515	11.9095	8.21676	15.6022
72	14.3549	8.27699	20.4327	11.635	7.90572	15.3642
73	14.1034	7.86957	20.3373	11.183	7.43448	14.9315
74	14.0677	7.65738	20.4779	10.5357	6.7893	14.2822
75	14.2284	7.72231	20.7346	9.88335	6.12896	13.6377
76	14.6502	8.18979	21.1106	9.36983	5.57353	13.1661
77	15.3498	9.0417	21.6579	9.09979	5.22434	12.9752
78	16.2542	10.1139	22.3945	8.99031	5.03851	12.9421
79	17.4853	11.4057	23.5649	9.19306	5.19752	13.1886
80	19.1112	12.9306	25.2918	9.62623	5.66078	13.5917
81	20.9049	14.5137	27.296	10.3347	6.46863	14.2008
82	22.7601	16.1595	29.3608	11.1153	7.3929	14.8377
83	24.8359	18.1262	31.5456	12.0465	8.46081	15.6322
84	26.9151	20.2348	33.5954	13.0351	9.53349	16.5368
85	28.9102	22.3627	35.4577	14.1608	10.6595	17.6622
86	30.8137	24.4242	37.2031	15.2672	11.6761	18.8584
87	32.4685	26.1542	38.7828	16.5221	12.809	20.2352
88	33.7121	27.2966	40.1277	17.8923	14.0576	21.7269
89	34.6196	27.9199	41.3193	19.3759	15.4724	23.2794
90	34.9875	27.9222	42.0527	20.9449	17.0341	24.8556
91	34.8133	27.4612	42.1655	22.5423	18.6655	26.419
92	34.0293	26.6378	41.4208	24.102	20.2735	27.9305
93	32.8286	25.6839	39.9734	25.4977	21.6931	29.3022
94	31.4331	24.7499	38.1162	26.5742	22.7519	30.3965
95	29.9459	23.7986	36.0932	27.3026	23.4574	31.1478
96	28.6788	22.8945	34.463	27.6593	23.8164	31.5021
97	27.4844	21.7151	33.2537	27.6191	23.8194	31.4188
98	26.6563	20.634	32.6785	27.3029	23.5719	31.0338
99	26.1858	19.8708	32.5008	26.7624	23.0775	30.4473
100	26.0621	19.5675	32.5568	26.1144	22.4283	29.8006
101	25.9645	19.4523	32.4767	25.3168	21.5557	29.0779
102	25.7885	19.3503	32.2266	24.5825	20.7026	28.4624
103	25.3885	19.0166	31.7603	23.8849	19.8816	27.8882
104	24.7554	18.3655	31.1454	23.2005	19.0897	27.3114
105	23.7129	17.24	30.1857	22.4717	18.2787	26.6646
106	22.4464	15.9179	28.9749	21.7781	17.5247	26.0316
107	21.1423	14.6413	27.6433	20.9343	16.6365	25.2321
108	19.9799	13.5786	26.3811	20.0807	15.7572	24.4043
109	19.1572	12.9031	25.4114	19.2702	14.9798	23.5606
110	18.7265	12.5786	24.8744	18.5928	14.4068	22.7789
111	18.5117	12.3793	24.6441	17.9971	13.9721	22.0221
112	18.7401	12.592	24.8881	17.638	13.7662	21.5097
113	19.2095	13.0601	25.3588	17.5704	13.7553	21.3854
114	19.7846	13.6699	25.8994	17.7937	13.9132	21.6743
115	20.3712	14.3229	26.4195	18.2527	14.2221	22.2833
116	20.9361	14.9223	26.9499	18.9526	14.7632	23.142
117	21.3775	15.3196	27.4354	19.7436	15.4615	24.0257
118	21.8555	15.6515	28.0595	20.5772	16.3057	24.8487
119	22.0688	15.6703	28.4673	21.2968	17.1221	25.4715
120	21.9917	15.4326	28.5507	21.8458	17.82	25.8716
121	21.4527	14.8145	28.0908	22.2948	18.424	26.1656
122	20.358	13.7393	26.9766	22.5519	18.7948	26.3089
123	18.7015	12.2052	25.1979	22.6156	18.9153	26.316
124	16.5954	10.2559	22.935	22.6496	18.9582	26.341
125	14.2908	8.0706	20.5111	22.7213	19.0236	26.419
126	11.9526	5.75532	18.1499	22.8129	19.1151	26.5108
127	10.0104	3.75322	16.2676	22.9879	19.299	26.6768
128	8.72613	2.42538	15.0269	23.1735	19.4888	26.8581
129	8.40608	2.15206	14.6601	23.325	19.6242	27.0259
130	8.95783	2.89973	15.0159	23.2806	19.5305	27.0307
131	10.3182	4.49658	16.1399	23.0443	19.213	26.8757
132	12.0781	6.40406	17.7521	22.5643	18.6386	26.4901
133	13.8883	8.15918	19.6173	21.8616	17.8492	25.874
134	15.2041	9.23516	21.173	20.947	16.8859	25.008
135	15.7646	9.51339	22.0157	19.9527	15.8808	24.0247
136	15.4215	8.98106	21.8619	19.0067	14.9627	23.0506
137	14.0928	7.61779	20.5678	18.2079	14.2072	22.2087
138	11.9732	5.56881	18.3777	17.7318	13.7546	21.709
139	9.51127	3.22144	15.8011	17.6228	13.6387	21.607
140	6.97875	0.764054	13.1935	17.8769	13.8567	21.8971
141	4.95087	-1.24163	11.1434	18.4774	14.4153	22.5394
142	3.68564	-2.47282	9.8441	19.289	15.1965	23.3815
143	3.12448	-2.94853	9.19749	20.1263	16.0215	24.2311
144	3.26064	-2.65621	9.17748	20.84	16.7545	24.9254
145	3.89241	-1.84006	9.62489	21.2467	17.1972	25.2963
146	4.71309	-0.88214	10.3083	21.2346	17.2344	25.2349
147	5.33501	-0.233882	10.9039	20.9207	16.9699	24.8715
148	5.64304	-0.00729323	11.2934	20.2409	16.3358	24.146
149	5.64711	-0.133824	11.4281	19.2952	15.4341	23.1564
150	5.23701	-0.668573	11.1426	18.4265	14.5831	22.2699
151	4.7384	-1.21885	10.6956	17.6567	13.8074	21.506
152	4.32369	-1.61423	10.2616	16.9397	13.0672	20.8122
153	4.2592	-1.59619	10.1146	16.4884	12.588	20.3888
154	4.50505	-1.23753	10.2476	16.2293	12.3176	20.141
155	5.136	-0.47856	10.7506	16.0638	12.201	19.9267
156	5.83139	0.325138	11.3376	15.889	12.1234	19.6546
157	6.58786	1.1739	12.0018	15.5692	11.9266	19.2117
158	7.12987	1.79786	12.4619	15.1162	11.5626	18.6699
159	7.22446	1.93985	12.5091	14.6081	11.0562	18.1599
160	6.81982	1.5317	12.1079	14.1363	10.4861	17.7864
161	5.98699	0.58894	11.385	13.7133	9.90592	17.5207
162	4.86787	-0.771962	10.5077	13.4523	9.48553	17.4192
163	3.71403	-2.23612	9.66418	13.3869	9.30334	17.4704
164	2.75899	-3.51198	9.02996	13.5266	9.39087	17.6623
165	2.33019	-4.16803	8.8284	13.8504	9.73506	17.9658
166	2.4558	-4.09453	9.00614	14.2284	10.1924	18.2644
167	2.97928	-3.44315	9.40171	14.4479	10.5361	18.3597
168	3.79193	-2.32204	9.9059	14.552	10.7626	18.3413
169	4.63806	-1.08579	10.3619	14.3998	10.6876	18.112
170	5.2757	-0.127223	10.6786	14.0155	10.2945	17.7365
171	5.48568	0.186075	10.7853	13.3901	9.57898	17.2012
172	5.20258	-0.281215	10.6864	12.6584	8.73493	16.5818
173	4.50783	-1.36335	10.379	11.935	7.9377	15.9323
174	3.557	-2.74011	9.8541	11.208	7.22029	15.1957
175	2.74309	-3.86314	9.34932	10.6123	6.71266	14.512
176	1.98774	-4.76714	8.74261	10.1928	6.40382	13.9817
177	1.7001	-5.0148	8.41499	9.83272	6.08822	13.5772
178	1.82576	-4.70761	8.35913	9.51871	5.70242	13.335
179	2.26885	-4.05811	8.59582	9.21472	5.23356	13.1959
180	2.86984	-3.33456	9.07425	8.99086	4.83369	13.148
181	3.5358	-2.66555	9.73716	8.64789	4.38064	12.9151
182	4.04503	-2.24944	10.3395	8.28097	4.00816	12.5538
183	4.06454	-2.36553	10.4946	7.95388	3.77419	12.1336
184	3.67922	-2.81519	10.1736	7.60734	3.58351	11.6312
185	2.87971	-3.58638	9.34581	7.26037	3.37857	11.1422
186	1.81909	-4.5427	8.18089	6.89227	3.09737	10.6872
187	0.587779	-5.71301	6.88857	6.49583	2.72718	10.2645
188	-0.863307	-7.20071	5.4741	6.08344	2.30817	9.85871
189	-2.28839	-8.77877	4.20199	5.70213	1.91251	9.49174
190	-3.58946	-10.2526	3.07364	5.24315	1.44531	9.041
191	-4.75001	-11.4733	1.97324	4.74187	0.937998	8.54574
192	-5.69425	-12.3252	0.936728	4.25149	0.434414	8.06857
193	-6.51681	-12.9355	-0.0980809	3.8898	0.0513156	7.72828
194	-7.14991	-13.3286	-0.971224	3.51894	-0.335075	7.37295
195	-7.42636	-13.434	-1.41876	3.27334	-0.605655	7.15233
196	-7.49074	-13.4155	-1.566	2.99891	-0.902036	6.89986
197	-7.35065	-13.2515	-1.44983	2.81052	-1.12827	6.74931
198	-6.87722	-12.733	-1.02142	2.71554	-1.28491	6.71599
199	-6.25399	-12.0652	-0.442781	2.76942	-1.31254	6.85139
200	-5.57659	-11.3535	0.200296	2.92423	-1.24888	7.09734

## Sheet: Panel_F
time	vEyeVelBlack_Mean	vEyeVelBlack_95ci_low	vEyeVelBlack_95ci_up	vEyeVelWhite_Mean	vEyeVelWhite_95ci_low	vEyeVelWhite_95ci_up
-100	9.31104	2.65644	15.9656	6.33138	2.87298	9.78977
-99	10.3951	3.81945	16.9708	6.19584	2.71481	9.67686
-98	11.0477	4.54209	17.5534	6.43811	2.93476	9.94146
-97	11.1527	4.62928	17.6762	7.02051	3.52361	10.5174
-96	10.6786	4.06193	17.2953	7.74681	4.29948	11.1941
-95	9.94754	3.24369	16.6514	8.57281	5.18364	11.962
-94	8.87029	2.17319	15.5674	9.34298	5.99184	12.6941
-93	7.68198	1.1114	14.2526	9.91573	6.55918	13.2723
-92	6.61903	0.233676	13.0044	10.1374	6.72824	13.5465
-91	5.85428	-0.41266	12.1212	10.1219	6.64768	13.5961
-90	5.51665	-0.797859	11.8312	9.86928	6.36125	13.3773
-89	5.6196	-0.911209	12.1504	9.526	6.03707	13.0149
-88	6.17241	-0.647925	12.9927	9.05975	5.62557	12.4939
-87	6.97447	-0.1048	14.0537	8.58219	5.19255	11.9718
-86	7.79701	0.558068	15.036	8.04174	4.6411	11.4424
-85	8.47272	1.1891	15.7563	7.49247	4.00419	10.9807
-84	8.92065	1.70955	16.1317	6.90173	3.28317	10.5203
-83	9.02453	2.02592	16.0231	6.24241	2.50581	9.97901
-82	8.45804	1.77634	15.1397	5.58719	1.80219	9.37218
-81	7.47702	1.10391	13.8501	4.9921	1.25639	8.72781
-80	6.03089	-0.144705	12.2065	4.41346	0.801811	8.02512
-79	4.53356	-1.60076	10.6679	4.20882	0.748976	7.66866
-78	2.99902	-3.26532	9.26335	4.21512	0.879151	7.55108
-77	1.86907	-4.6043	8.34243	4.62431	1.33923	7.9094
-76	1.08195	-5.57684	7.74074	5.29434	1.98402	8.60465
-75	0.94794	-5.83949	7.73537	6.1133	2.73046	9.49613
-74	1.24917	-5.58994	8.08827	6.9326	3.46738	10.3978
-73	2.16473	-4.71491	9.04436	7.63611	4.11611	11.1561
-72	3.61715	-3.2924	10.5267	8.0937	4.55624	11.6312
-71	5.58856	-1.32031	12.4974	8.14244	4.62636	11.6585
-70	7.59465	0.727333	14.462	7.78878	4.31965	11.2579
-69	9.61753	2.82598	16.4091	7.14559	3.72773	10.5634
-68	11.3391	4.63647	18.0416	6.36614	2.98876	9.74353
-67	12.6219	5.99467	19.2491	5.53108	2.16048	8.90169
-66	13.3929	6.79946	19.9863	4.77295	1.38646	8.15945
-65	13.6361	7.05157	20.2207	4.27018	0.852137	7.68823
-64	13.2777	6.69188	19.8636	4.13419	0.673722	7.59466
-63	12.4295	5.84354	19.0154	4.19799	0.708682	7.68729
-62	11.2523	4.63684	17.8678	4.54071	1.04814	8.03329
-61	9.92685	3.23625	16.6175	5.06456	1.58659	8.54253
-60	8.62367	1.80167	15.4457	5.68213	2.23532	9.12895
-59	7.47278	0.532041	14.4135	6.32807	2.91283	9.74331
-58	6.55172	-0.404811	13.5082	6.93433	3.53787	10.3308
-57	6.08504	-0.777268	12.9473	7.42894	4.03026	10.8276
-56	5.89115	-0.833083	12.6154	7.87569	4.45179	11.2996
-55	6.06774	-0.564967	12.7004	8.17127	4.70291	11.6396
-54	6.53876	-0.131078	13.2086	8.2954	4.78629	11.8045
-53	7.12051	0.295943	13.9451	8.24518	4.72021	11.7701
-52	7.66976	0.650306	14.6892	8.06026	4.55039	11.5701
-51	7.95732	0.840982	15.0737	7.61516	4.13689	11.0934
-50	8.0799	1.00333	15.1565	7.19231	3.74268	10.6419
-49	7.92422	0.996314	14.8521	6.7579	3.33407	10.1817
-48	7.5824	0.848011	14.3168	6.51508	3.09504	9.93511
-47	6.90036	0.329319	13.4714	6.45879	3.02803	9.88955
-46	6.38367	-0.0633926	12.8307	6.54279	3.11219	9.9734
-45	5.98303	-0.398412	12.3645	6.80585	3.38865	10.223
-44	5.72076	-0.68069	12.1222	7.28061	3.88969	10.6715
-43	5.94484	-0.547816	12.4375	7.84405	4.48474	11.2034
-42	6.68691	0.0132289	13.3606	8.28203	4.94166	11.6224
-41	7.64937	0.770961	14.5278	8.49468	5.16703	11.8223
-40	8.719	1.68865	15.7493	8.50887	5.18515	11.8326
-39	9.61256	2.55637	16.6688	8.37687	5.05168	11.7021
-38	10.2823	3.2774	17.2871	8.11212	4.77286	11.4514
-37	10.5058	3.58004	17.4316	7.69095	4.31392	11.068
-36	10.4492	3.55897	17.3395	7.26202	3.827	10.697
-35	9.95545	3.03576	16.8751	6.92015	3.41799	10.4223
-34	9.21688	2.20708	16.2267	6.61594	3.0561	10.1758
-33	8.47196	1.43096	15.513	6.38271	2.79018	9.97525
-32	7.91605	0.955809	14.8763	6.23251	2.63409	9.83094
-31	7.70541	0.967185	14.4436	6.14657	2.56247	9.73066
-30	7.77746	1.35851	14.1964	6.06317	2.48923	9.63711
-29	8.01344	1.9041	14.1228	6.06166	2.48771	9.63562
-28	8.34042	2.42586	14.255	6.10635	2.52402	9.68868
-27	8.7167	2.78883	14.6446	6.34494	2.7494	9.94047
-26	8.92508	2.80773	15.0424	6.71383	3.10581	10.3218
-25	8.81145	2.45504	15.1679	7.19507	3.57602	10.8141
-24	8.39391	1.84039	14.9474	7.79691	4.16907	11.4247
-23	7.81078	1.20431	14.4173	8.42287	4.79947	12.0463
-22	7.11287	0.583184	13.6426	8.79902	5.19043	12.4076
-21	6.38322	0.0126874	12.7538	8.98088	5.38723	12.5745
-20	5.74173	-0.501826	11.9853	8.93361	5.35797	12.5092
-19	5.26868	-0.96471	11.5021	8.61641	5.05444	12.1784
-18	4.89994	-1.43733	11.2372	8.05757	4.5084	11.6067
-17	4.6276	-1.86422	11.1194	7.3956	3.86971	10.9215
-16	4.54163	-2.09128	11.1745	6.74408	3.26834	10.2198
-15	4.47899	-2.19999	11.158	6.29	2.89664	9.68337
-14	4.51354	-2.12075	11.1478	6.02861	2.71806	9.33916
-13	4.67682	-1.87281	11.2265	5.95942	2.69213	9.2267
-12	4.99297	-1.46641	11.4524	6.09701	2.79663	9.39739
-11	5.60011	-0.793908	11.9941	6.37234	2.96791	9.77677
-10	6.39609	0.0290002	12.7632	6.68248	3.14625	10.2187
-9	7.48633	1.13973	13.8329	7.05115	3.41565	10.6866
-8	8.89631	2.57157	15.2211	7.37267	3.71992	11.0254
-7	10.5481	4.26605	16.8301	7.65923	4.06179	11.2567
-6	11.9935	5.75462	18.2324	7.89071	4.38381	11.3976
-5	13.238	7.02828	19.4478	8.12014	4.69528	11.545
-4	13.9829	7.81381	20.152	8.40852	5.00007	11.817
-3	14.0614	7.9473	20.1756	8.62508	5.16386	12.0863
-2	13.3499	7.30389	19.3958	8.85586	5.30727	12.4044
-1	11.9862	6.0035	17.9689	8.89185	5.26107	12.5226
0	10.1511	4.19819	16.1041	8.75983	5.08678	12.4329
1	7.83279	1.83163	13.8339	8.43475	4.77509	12.0944
2	5.66038	-0.478061	11.7988	7.97295	4.36052	11.5854
3	3.82761	-2.50031	10.1555	7.3574	3.79638	10.9184
4	2.34387	-4.16012	8.84786	6.70848	3.19241	10.2246
5	1.47925	-5.08863	8.04713	6.16745	2.68542	9.64948
6	1.2816	-5.2286	7.79179	5.83188	2.38203	9.28174
7	1.53107	-4.83744	7.89958	5.74991	2.33318	9.16664
8	2.06708	-4.18181	8.31597	5.97712	2.58817	9.36606
9	2.7472	-3.46854	8.96295	6.58714	3.1978	9.97648
10	3.32722	-2.99044	9.64489	7.38329	3.94335	10.8232
11	3.84886	-2.65312	10.3508	8.22912	4.71301	11.7452
12	4.19562	-2.47563	10.8669	9.04098	5.46343	12.6185
13	4.42728	-2.29463	11.1492	9.61125	6.02542	13.1971
14	4.72066	-1.96702	11.4083	9.84447	6.31647	13.3725
15	5.04694	-1.57651	11.6704	9.69932	6.28442	13.1142
16	5.58986	-1.0026	12.1823	9.28265	5.99331	12.572
17	6.25426	-0.356145	12.8647	8.58874	5.37897	11.7985
18	7.04065	0.360715	13.7206	7.76693	4.55192	10.9819
19	7.7273	0.982922	14.4717	6.83732	3.53128	10.1434
20	8.22757	1.49969	14.9554	6.11301	2.68175	9.54426
21	8.59839	1.95594	15.2408	5.56625	2.03374	9.09875
22	8.71569	2.1852	15.2462	5.25273	1.67636	8.82911
23	8.53916	2.1148	14.9635	5.17264	1.6211	8.72419
24	8.21747	1.85137	14.5836	5.36604	1.88135	8.85073
25	7.8051	1.40779	14.2024	5.70969	2.28412	9.13526
26	7.42089	0.9536	13.8882	6.06804	2.65023	9.48584
27	7.13873	0.624815	13.6527	6.46971	3.01076	9.92865
28	7.00533	0.522291	13.4884	6.68374	3.15814	10.2093
29	6.93731	0.539951	13.3347	6.72047	3.13878	10.3022
30	6.88061	0.607123	13.1541	6.62212	3.00987	10.2344
31	6.84655	0.698835	12.9943	6.3363	2.72791	9.94469
32	6.74339	0.664828	12.822	5.90957	2.31876	9.50039
33	6.47823	0.427348	12.5291	5.45754	1.87665	9.03842
34	6.35123	0.303157	12.3993	5.00989	1.42695	8.59283
35	6.47906	0.439458	12.5187	4.6068	1.00842	8.20519
36	6.68858	0.71402	12.6631	4.36056	0.752751	7.96837
37	7.0035	1.09704	12.9099	4.34118	0.738387	7.94397
38	7.59145	1.74035	13.4426	4.5795	0.990962	8.16804
39	8.16639	2.31306	14.0197	4.9262	1.343	8.50939
40	8.75509	2.80112	14.7091	5.43146	1.84069	9.02223
41	9.10129	2.9735	15.2291	6.01422	2.40344	9.625
42	9.25804	2.97127	15.5448	6.58445	2.96311	10.2058
43	9.16697	2.79161	15.5423	7.0957	3.48882	10.7026
44	8.8772	2.4898	15.2646	7.46529	3.90719	11.0234
45	8.6286	2.26773	14.9895	7.71897	4.23215	11.2058
46	8.6391	2.2721	15.0061	7.84599	4.42031	11.2717
47	9.19366	2.77848	15.6088	7.82882	4.41654	11.2411
48	10.2901	3.74096	16.8392	7.70515	4.26373	11.1466
49	11.9473	5.24348	18.651	7.7147	4.21732	11.2121
50	14.0416	7.24755	20.8357	7.82186	4.26281	11.3809
51	16.2672	9.44982	23.0846	8.14882	4.53621	11.7614
52	18.2009	11.4087	24.9931	8.80955	5.16845	12.4506
53	19.5006	12.7147	26.2865	9.95392	6.30868	13.5992
54	20.1741	13.3436	27.0046	11.5023	7.87025	15.1344
55	20.0028	13.0986	26.9071	13.5138	9.90624	17.1214
56	19.2122	12.2652	26.1593	15.9989	12.4261	19.5718
57	18.1583	11.2306	25.0861	18.8498	15.3028	22.3969
58	17.2681	10.4076	24.1285	21.8375	18.3087	25.3663
59	16.9541	10.1416	23.7665	24.7826	21.2579	28.3074
60	17.3758	10.5744	24.1771	27.5623	24.0315	31.0931
61	18.6378	11.7896	25.486	29.8735	26.3388	33.4082
62	20.7017	13.8073	27.5961	31.6275	28.1027	35.1523
63	23.4539	16.5876	30.3201	32.5946	29.0881	36.1011
64	26.4998	19.7914	33.2082	32.7907	29.3101	36.2712
65	29.5019	22.9766	36.0272	32.2129	28.7517	35.6742
66	32.3304	25.9179	38.743	31.028	27.5697	34.4862
67	34.7663	28.3057	41.227	29.4928	26.0234	32.9621
68	36.6643	30.0389	43.2896	27.7001	24.2109	31.1892
69	38.1607	31.3464	44.9751	26.0533	22.5475	29.5591
70	39.1747	32.2524	46.0969	24.7578	21.2486	28.2669
71	39.7464	32.8814	46.6114	24.0459	20.5502	27.5416
72	39.907	33.2261	46.5879	23.9517	20.4795	27.4238
73	39.5966	33.166	46.0272	24.4472	21.0057	27.8888
74	38.7059	32.4629	44.9489	25.4718	22.0539	28.8897
75	37.1849	31.0089	43.3609	26.8876	23.4694	30.3058
76	35.3203	29.1139	41.5268	28.4406	25.0025	31.8788
77	33.1667	26.8892	39.4441	29.9082	26.4452	33.3713
78	30.9993	24.649	37.3496	31.1172	27.6431	34.5914
79	28.8541	22.4794	35.2287	31.8362	28.3772	35.2951
80	27.095	20.7202	33.4699	32.0282	28.6082	35.4483
81	25.7443	19.3625	32.1261	31.6529	28.2781	35.0277
82	24.8425	18.3966	31.2884	30.7822	27.422	34.1425
83	24.4049	17.8279	30.982	29.4691	26.0826	32.8557
84	24.3132	17.5962	31.0301	27.9247	24.4763	31.3731
85	24.234	17.3922	31.0757	26.2476	22.7268	29.7684
86	24.0602	17.1757	30.9448	24.6451	21.0608	28.2294
87	23.983	17.1966	30.7694	23.1191	19.5019	26.7364
88	23.7952	17.1993	30.391	21.5849	17.9578	25.212
89	23.361	16.9961	29.726	20.095	16.4906	23.6994
90	22.904	16.74	29.068	18.4909	14.9294	22.0524
91	22.5736	16.5332	28.6139	16.674	13.1522	20.1957
92	22.3315	16.3616	28.3013	14.4998	10.9945	18.005
93	22.1439	16.2226	28.0652	11.9846	8.47226	15.4969
94	21.8669	15.9988	27.7351	9.11014	5.5687	12.6516
95	21.5457	15.6976	27.3938	5.9153	2.35028	9.48031
96	21.1511	15.2243	27.0779	2.77917	-0.790666	6.349
97	20.5086	14.3987	26.6186	-0.247285	-3.805	3.31043
98	19.8119	13.4533	26.1705	-3.00513	-6.54484	0.534593
99	19.2052	12.646	25.7644	-5.31562	-8.86084	-1.77039
100	18.8457	12.1926	25.4989	-6.98364	-10.5745	-3.39276
101	18.6399	11.9974	25.2825	-8.03162	-11.6895	-4.37374
102	18.6371	12.0477	25.2265	-8.45423	-12.1754	-4.73301
103	18.7495	12.1889	25.31	-8.26822	-12.0353	-4.50116
104	18.8789	12.309	25.4488	-7.63649	-11.4228	-3.8502
105	18.8391	12.2343	25.4438	-6.6532	-10.4386	-2.86777
106	18.5844	12.0043	25.1644	-5.37512	-9.15508	-1.59516
107	18.2457	11.762	24.7293	-3.94078	-7.72001	-0.161556
108	17.6372	11.3135	23.9609	-2.51418	-6.2971	1.26873
109	16.9993	10.8179	23.1806	-1.18794	-4.97461	2.59873
110	16.5636	10.3911	22.7361	0.0499942	-3.73187	3.83186
111	16.5459	10.2242	22.8676	1.13503	-2.64353	4.9136
112	16.9276	10.3757	23.4795	1.99694	-1.78117	5.77504
113	17.6737	10.9381	24.4092	2.61876	-1.16809	6.40561
114	18.6005	11.8284	25.3727	3.04538	-0.760192	6.85096
115	19.4425	12.7711	26.114	3.3603	-0.453013	7.17361
116	19.9197	13.473	26.3665	3.60502	-0.192833	7.40288
117	19.8146	13.5759	26.0533	3.94348	0.187976	7.69898
118	19.0411	12.9055	25.1767	4.31631	0.63282	7.99981
119	17.6326	11.5195	23.7457	4.9478	1.34117	8.55444
120	15.8518	9.70036	22.0032	5.81275	2.28321	9.3423
121	13.8934	7.73557	20.0513	6.92468	3.44693	10.4024
122	12.204	6.10131	18.3066	8.19462	4.72903	11.6602
123	10.9346	4.94035	16.9289	9.54588	6.05367	13.0381
124	10.125	4.23598	16.014	10.8322	7.2918	14.3726
125	9.97528	4.15321	15.7974	11.8878	8.29911	15.4764
126	9.98873	4.18515	15.7923	12.6461	9.02196	16.2703
127	10.2154	4.38227	16.0485	12.9221	9.28685	16.5574
128	10.288	4.35249	16.2235	12.7056	9.09045	16.3208
129	10.149	4.07276	16.2253	11.9458	8.36791	15.5236
130	9.46291	3.19402	15.7318	10.8116	7.27841	14.3448
131	8.42027	1.95461	14.8859	9.46423	5.98373	12.9447
132	7.24228	0.613184	13.8714	8.0114	4.56985	11.453
133	5.99914	-0.732608	12.7309	6.57942	3.16817	9.99066
134	4.78474	-1.94203	11.5115	5.46348	2.0646	8.86237
135	3.67602	-2.93825	10.2903	4.87762	1.47565	8.27958
136	2.93715	-3.49949	9.37378	4.79452	1.37776	8.21127
137	2.28894	-4.02975	8.60763	5.15336	1.72343	8.58329
138	1.6477	-4.70106	7.99646	5.87898	2.43993	9.31803
139	1.12333	-5.42312	7.66978	6.86443	3.42591	10.303
140	0.545675	-6.27984	7.37119	7.92317	4.49681	11.3495
141	0.0317302	-7.01367	7.07713	8.82146	5.40885	12.2341
142	-0.461069	-7.55549	6.63335	9.43597	6.0265	12.8454
143	-0.719119	-7.63952	6.20128	9.75468	6.31909	13.1903
144	-0.665775	-7.27077	5.93922	9.83112	6.33987	13.3224
145	-0.434375	-6.66817	5.79942	9.66165	6.08873	13.2346
146	-0.0865909	-6.05878	5.8856	9.48428	5.83108	13.1375
147	0.472471	-5.39917	6.34412	9.36749	5.66412	13.0709
148	1.01868	-4.91939	6.95674	9.52425	5.8166	13.2319
149	1.44093	-4.65244	7.53431	9.9377	6.26599	13.6094
150	1.58014	-4.71435	7.87463	10.6401	7.04421	14.236
151	1.54717	-4.93408	8.02841	11.4902	7.98271	14.9978
152	1.18856	-5.43834	7.81546	12.4365	9.01789	15.8551
153	0.572593	-6.12469	7.26988	13.3353	9.98914	16.6814
154	0.00774198	-6.65268	6.66817	13.9063	10.6132	17.1994
155	-0.730458	-7.22982	5.7689	14.1998	10.9204	17.4792
156	-1.23685	-7.50997	5.03626	14.1797	10.8662	17.4932
157	-1.42105	-7.48648	4.64438	13.832	10.4476	17.2164
158	-1.23927	-7.21327	4.73474	13.1443	9.6901	16.5984
159	-0.730307	-6.7578	5.29719	12.3743	8.8824	15.8661
160	0.123385	-6.09225	6.33902	11.6117	8.12767	15.0957
161	1.32125	-5.13122	7.77371	10.8296	7.39353	14.2656
162	2.56823	-4.07703	9.21349	10.1211	6.72793	13.5142
163	3.75775	-2.99319	10.5087	9.56256	6.16807	12.957
164	4.78192	-1.9549	11.5187	9.21869	5.76752	12.6699
165	5.51756	-1.07243	12.1076	9.08929	5.55197	12.6266
166	5.76457	-0.609793	12.1389	9.17636	5.56074	12.792
167	5.4951	-0.673342	11.6636	9.55518	5.90625	13.2041
168	5.01772	-1.00863	11.0441	10.2641	6.6322	13.896
169	4.31688	-1.67273	10.3065	11.258	7.68166	14.8343
170	3.62728	-2.44048	9.69503	12.4326	8.92825	15.937
171	3.27967	-2.88815	9.4475	13.8	10.3488	17.2511
172	3.32207	-2.937	9.58114	15.1334	11.7005	18.5662
173	3.84697	-2.46527	10.1592	16.3231	12.8833	19.7629
174	4.82123	-1.52268	11.1651	17.1593	13.6913	20.6273
175	6.06537	-0.291114	12.4218	17.5493	14.0468	21.0517
176	7.45944	1.09812	13.8208	17.4691	13.9242	21.0139
177	8.70602	2.34223	15.0698	16.97	13.3763	20.5636
178	9.73498	3.38851	16.0815	16.0366	12.3954	19.6779
179	10.177	3.84664	16.5073	14.8039	11.1281	18.4797
180	10.1765	3.84441	16.5087	13.4191	9.72508	17.1132
181	9.87661	3.49913	16.2541	12.127	8.43859	15.8154
182	9.26917	2.81064	15.7277	10.9847	7.3307	14.6388
183	8.64553	2.12185	15.1692	10.1737	6.56708	13.7803
184	7.91368	1.36604	14.4613	9.74072	6.17222	13.3092
185	7.07252	0.579308	13.5657	9.78968	6.23869	13.3407
186	6.3139	-0.0510827	12.6789	10.1661	6.5975	13.7347
187	5.40298	-0.837676	11.6436	10.7659	7.16337	14.3684
188	4.3153	-1.86311	10.4937	11.6056	7.97745	15.2337
189	3.09412	-3.15616	9.3444	12.4989	8.87473	16.1231
190	1.69106	-4.7994	8.18153	13.1822	9.60848	16.756
191	0.313843	-6.49762	7.1253	13.6813	10.1984	17.1642
192	-0.780608	-7.90303	6.34182	13.8875	10.5103	17.2648
193	-1.17911	-8.47163	6.11342	13.8191	10.5239	17.1143
194	-0.909464	-8.17873	6.3598	13.4977	10.2384	16.757
195	0.148086	-6.91698	7.21315	12.9537	9.66672	16.2407
196	2.05879	-4.71597	8.83355	12.3145	8.95748	15.6716
197	4.58484	-1.9551	11.1248	11.7096	8.268	15.1512
198	7.37165	0.906652	13.8367	11.1947	7.67388	14.7155
199	9.86978	3.29214	16.4474	10.7572	7.16768	14.3467
200	11.7475	4.97535	18.5196	10.5059	6.86031	14.1515

## Sheet: S1_Panel_A
time	vEyePos_Pos1_Mean	vEyePos_Pos1_95ci_low	vEyePos_Pos1_95ci_up	vEyePos_Pos2_Mean	vEyePos_Pos2_95ci_low	vEyePos_Pos2_95ci_up	vEyePos_Pos3_Mean	vEyePos_Pos3_95ci_low	vEyePos_Pos3_95ci_up
-100	-0.925209	-1.20405	-0.646371	-0.29305	-0.605052	0.0189518	-0.123575	-0.470554	0.223403
-99	-0.949475	-1.22622	-0.672731	-0.266943	-0.588189	0.0543036	-0.126167	-0.470215	0.217882
-98	-0.915065	-1.19023	-0.639895	-0.252087	-0.573316	0.0691414	-0.138046	-0.478902	0.20281
-97	-0.888158	-1.15926	-0.617054	-0.307134	-0.621499	0.00723119	-0.128762	-0.465028	0.207504
-96	-0.849303	-1.1143	-0.584305	-0.357255	-0.666322	-0.0481877	-0.166687	-0.488798	0.155424
-95	-0.79329	-1.05751	-0.529072	-0.335122	-0.643154	-0.0270902	-0.146054	-0.461742	0.169633
-94	-0.772649	-1.04018	-0.505115	-0.318533	-0.625604	-0.0114614	-0.106452	-0.420011	0.207107
-93	-0.776203	-1.0442	-0.508203	-0.311201	-0.618745	-0.00365706	-0.112921	-0.4239	0.198059
-92	-0.736603	-1.00125	-0.471958	-0.352699	-0.66439	-0.0410077	-0.112026	-0.423497	0.199445
-91	-0.70633	-0.967806	-0.444854	-0.342461	-0.652835	-0.0320883	-0.149448	-0.45803	0.159134
-90	-0.711474	-0.973295	-0.449653	-0.334843	-0.641606	-0.0280804	-0.121046	-0.430217	0.188125
-89	-0.712367	-0.971627	-0.453108	-0.36506	-0.672492	-0.0576268	-0.0914212	-0.400991	0.218148
-88	-0.654274	-0.909185	-0.399363	-0.390382	-0.703213	-0.077551	-0.113733	-0.422068	0.194601
-87	-0.667935	-0.918782	-0.417087	-0.392584	-0.703013	-0.0821545	-0.0808117	-0.390924	0.229301
-86	-0.66963	-0.917574	-0.421686	-0.386802	-0.693353	-0.0802501	-0.0908492	-0.383481	0.201783
-85	-0.683728	-0.930402	-0.437055	-0.34998	-0.65646	-0.0435004	-0.136739	-0.425215	0.151737
-84	-0.657327	-0.900094	-0.41456	-0.31372	-0.615007	-0.0124325	-0.117387	-0.413596	0.178823
-83	-0.641774	-0.881025	-0.402524	-0.343113	-0.642364	-0.0438621	-0.115424	-0.406748	0.1759
-82	-0.625509	-0.870656	-0.380362	-0.333774	-0.627507	-0.0400415	-0.0901703	-0.368624	0.188283
-81	-0.646813	-0.894418	-0.399209	-0.306633	-0.59088	-0.0223851	-0.0760157	-0.3507	0.198669
-80	-0.679605	-0.926856	-0.432353	-0.276576	-0.553446	0.000294393	-0.101425	-0.37141	0.16856
-79	-0.681411	-0.92605	-0.436772	-0.241448	-0.511648	0.0287525	-0.0957355	-0.37308	0.181609
-78	-0.68736	-0.932632	-0.442089	-0.224342	-0.485934	0.0372497	-0.150217	-0.425921	0.125488
-77	-0.666372	-0.909603	-0.42314	-0.238703	-0.504172	0.0267656	-0.148475	-0.428178	0.131228
-76	-0.644712	-0.885818	-0.403605	-0.251466	-0.51282	0.00988772	-0.122975	-0.392679	0.146729
-75	-0.630815	-0.872108	-0.389522	-0.292165	-0.552292	-0.0320375	-0.0830013	-0.345157	0.179154
-74	-0.623598	-0.858548	-0.388649	-0.270478	-0.527249	-0.013707	-0.083198	-0.350038	0.183642
-73	-0.630457	-0.862581	-0.398332	-0.273213	-0.533051	-0.0133753	-0.103572	-0.37106	0.163916
-72	-0.622938	-0.848678	-0.397199	-0.274742	-0.536641	-0.0128441	-0.151438	-0.411296	0.108419
-71	-0.623678	-0.842718	-0.404638	-0.249146	-0.5069	0.00860782	-0.118821	-0.386224	0.148582
-70	-0.642687	-0.867785	-0.417588	-0.258344	-0.518382	0.00169484	-0.0627737	-0.342382	0.216835
-69	-0.584337	-0.815487	-0.353186	-0.223242	-0.486193	0.0397085	-0.0963534	-0.371807	0.1791
-68	-0.544814	-0.773208	-0.316419	-0.18892	-0.44445	0.0666112	-0.114349	-0.379979	0.15128
-67	-0.552238	-0.775908	-0.328569	-0.188339	-0.434075	0.0573975	-0.0823874	-0.351468	0.186693
-66	-0.571343	-0.788681	-0.354005	-0.207311	-0.445851	0.0312293	-0.106474	-0.374803	0.161854
-65	-0.570752	-0.781643	-0.35986	-0.210675	-0.447241	0.0258918	-0.0805776	-0.346111	0.184956
-64	-0.514304	-0.727587	-0.301022	-0.218034	-0.453204	0.0171356	-0.0833582	-0.339294	0.172578
-63	-0.475644	-0.68805	-0.263238	-0.280123	-0.520366	-0.0398799	-0.0934106	-0.344775	0.157954
-62	-0.466266	-0.676442	-0.256091	-0.286462	-0.526209	-0.0467157	-0.0450079	-0.293652	0.203636
-61	-0.465703	-0.679961	-0.251444	-0.290058	-0.537617	-0.0424983	-0.0987325	-0.33826	0.140795
-60	-0.45226	-0.670614	-0.233905	-0.272925	-0.5223	-0.02355	-0.0975409	-0.32357	0.128488
-59	-0.454671	-0.670911	-0.238431	-0.247236	-0.499538	0.00506661	-0.0935051	-0.316172	0.129162
-58	-0.444663	-0.662092	-0.227233	-0.226035	-0.472533	0.0204627	-0.119381	-0.345783	0.10702
-57	-0.439321	-0.650734	-0.227908	-0.222975	-0.465612	0.0196619	-0.104705	-0.331718	0.122308
-56	-0.435631	-0.639705	-0.231556	-0.22321	-0.470739	0.0243188	-0.133318	-0.349315	0.082679
-55	-0.435345	-0.648009	-0.22268	-0.198801	-0.448972	0.051369	-0.148995	-0.368245	0.0702547
-54	-0.450071	-0.663998	-0.236145	-0.172787	-0.424487	0.078913	-0.146315	-0.37115	0.0785199
-53	-0.498758	-0.706191	-0.291325	-0.140117	-0.386177	0.105944	-0.138684	-0.362207	0.0848392
-52	-0.489248	-0.688877	-0.289618	-0.144871	-0.389305	0.0995623	-0.118706	-0.343506	0.106095
-51	-0.531067	-0.733698	-0.328436	-0.144021	-0.392633	0.104592	-0.0942137	-0.312036	0.123609
-50	-0.563334	-0.761723	-0.364944	-0.170545	-0.416648	0.0755573	-0.0455974	-0.255809	0.164615
-49	-0.56764	-0.763428	-0.371851	-0.190711	-0.429567	0.0481453	-0.0688195	-0.274484	0.136845
-48	-0.536558	-0.730682	-0.342434	-0.170322	-0.401551	0.0609058	-0.0986173	-0.30154	0.104305
-47	-0.485415	-0.682472	-0.288357	-0.158861	-0.381746	0.0640253	-0.0685043	-0.280201	0.143192
-46	-0.454596	-0.648843	-0.260349	-0.179864	-0.39506	0.0353318	-0.03693	-0.258275	0.184415
-45	-0.450471	-0.639205	-0.261738	-0.158902	-0.369436	0.0516326	-0.0562546	-0.275195	0.162686
-44	-0.483584	-0.666039	-0.30113	-0.143774	-0.353369	0.0658213	-0.0834264	-0.303263	0.136411
-43	-0.452681	-0.628925	-0.276438	-0.156067	-0.369538	0.0574047	-0.0805644	-0.300959	0.13983
-42	-0.404581	-0.586983	-0.222178	-0.13159	-0.344454	0.0812739	-0.0675389	-0.291666	0.156588
-41	-0.416668	-0.602672	-0.230664	-0.0923729	-0.299704	0.114959	-0.0339486	-0.248468	0.180571
-40	-0.384794	-0.568811	-0.200778	-0.0869627	-0.293304	0.119378	-0.0716679	-0.276183	0.132847
-39	-0.322455	-0.511686	-0.133225	-0.134999	-0.339467	0.0694687	-0.105131	-0.30102	0.0907582
-38	-0.343279	-0.530592	-0.155967	-0.181499	-0.384632	0.0216353	-0.0557309	-0.245902	0.13444
-37	-0.333277	-0.526013	-0.140541	-0.167	-0.374803	0.0408033	-0.0679561	-0.255956	0.120044
-36	-0.315425	-0.505339	-0.125512	-0.141323	-0.351001	0.0683553	-0.051773	-0.232115	0.128569
-35	-0.311304	-0.50403	-0.118577	-0.0895186	-0.299231	0.120194	-0.0634847	-0.242872	0.115902
-34	-0.278966	-0.471634	-0.0862974	-0.0811024	-0.287757	0.125552	-0.0394777	-0.216262	0.137306
-33	-0.265452	-0.457013	-0.0738913	-0.0904096	-0.301372	0.120553	-0.0869505	-0.256523	0.0826223
-32	-0.275331	-0.459601	-0.0910605	-0.0999996	-0.306148	0.106149	-0.103969	-0.265478	0.0575396
-31	-0.270823	-0.449959	-0.0916876	-0.092225	-0.287773	0.103323	-0.0544628	-0.212836	0.10391
-30	-0.219343	-0.392053	-0.0466325	-0.0219968	-0.208588	0.164595	-0.0127662	-0.165591	0.140058
-29	-0.256244	-0.429919	-0.0825687	0.0496941	-0.13736	0.236748	-0.048269	-0.19568	0.0991425
-28	-0.277327	-0.454353	-0.1003	0.0464334	-0.139871	0.232738	-0.070578	-0.215754	0.0745982
-27	-0.287384	-0.46412	-0.110647	0.0456189	-0.143932	0.23517	-0.0666557	-0.208775	0.0754631
-26	-0.273719	-0.452336	-0.0951025	0.0397118	-0.154024	0.233447	-0.0426324	-0.178788	0.0935233
-25	-0.29236	-0.471732	-0.112988	0.0109668	-0.189308	0.211241	-0.095301	-0.22676	0.0361582
-24	-0.293831	-0.465278	-0.122384	-0.0154051	-0.222106	0.191296	-0.122225	-0.259469	0.0150197
-23	-0.226459	-0.396884	-0.0560347	-0.000193862	-0.209319	0.208932	-0.106212	-0.237546	0.0251216
-22	-0.215332	-0.381099	-0.0495651	0.0426445	-0.162868	0.248157	-0.0589119	-0.194583	0.076759
-21	-0.197685	-0.360345	-0.0350259	0.102074	-0.09761	0.301758	-0.0918823	-0.231159	0.0473946
-20	-0.153748	-0.314988	0.00749114	0.114947	-0.0781809	0.308075	-0.0831045	-0.216862	0.0506529
-19	-0.16993	-0.333539	-0.00631994	0.0891318	-0.094496	0.27276	-0.129967	-0.260148	0.000214747
-18	-0.177809	-0.33537	-0.0202468	0.0609891	-0.122949	0.244927	-0.115727	-0.239619	0.00816397
-17	-0.174869	-0.328686	-0.0210524	0.0486674	-0.140604	0.237939	-0.0755478	-0.202121	0.0510257
-16	-0.192004	-0.347889	-0.0361203	0.030054	-0.158945	0.219054	-0.0510276	-0.175235	0.07318
-15	-0.135321	-0.289701	0.0190595	0.00110099	-0.181701	0.183903	-0.0319084	-0.155913	0.092096
-14	-0.116152	-0.275582	0.043278	0.0151735	-0.16768	0.198027	-0.023111	-0.145378	0.0991564
-13	-0.110405	-0.273805	0.0529942	0.0104316	-0.168568	0.189431	0.00237541	-0.119308	0.124059
-12	-0.0664453	-0.225662	0.0927716	0.0161664	-0.159763	0.192095	0.0356852	-0.0747943	0.146165
-11	-0.0887661	-0.238104	0.0605713	0.0482527	-0.128999	0.225504	-0.00301151	-0.113262	0.107239
-10	-0.0811403	-0.23294	0.0706598	0.0428027	-0.131017	0.216623	0.00371266	-0.107129	0.114555
-9	-0.0606994	-0.21152	0.0901214	-0.046934	-0.216472	0.122604	0.0396532	-0.0754606	0.154767
-8	-0.0400148	-0.183908	0.103878	-0.0693013	-0.239898	0.101295	0.032645	-0.0854036	0.150694
-7	-0.0469235	-0.185185	0.0913376	-0.0389289	-0.203941	0.126083	0.041223	-0.06247	0.144916
-6	-0.0410081	-0.172362	0.0903453	-0.03056	-0.184981	0.123861	0.0721116	-0.022979	0.167202
-5	-0.0622398	-0.189289	0.0648096	0.0102005	-0.137709	0.15811	0.0335788	-0.0544895	0.121647
-4	-0.0535755	-0.17067	0.0635194	0.0225366	-0.106049	0.151122	0.0463601	-0.0446821	0.137402
-3	-0.027182	-0.133062	0.0786977	-0.0165505	-0.127293	0.094192	0.0235677	-0.0593009	0.106436
-2	-0.01261	-0.0946478	0.0694277	-0.0423877	-0.138332	0.0535562	0.0262239	-0.052078	0.104526
-1	0.00558719	-0.0449774	0.0561518	-0.0265065	-0.0828192	0.0298063	0.044874	-0.00748453	0.0972325
0	0	0	0	0	0	0	0	0	0
1	-0.00374957	-0.0572253	0.0497262	-0.0264596	-0.0782437	0.0253245	-0.00847963	-0.0661447	0.0491854
2	-0.0319944	-0.113413	0.0494241	0.0128146	-0.082144	0.107773	-0.00765375	-0.0898028	0.0744953
3	-0.0171423	-0.118645	0.0843608	0.0606087	-0.0598642	0.181082	-0.00103566	-0.0995226	0.0974513
4	0.0290655	-0.0822478	0.140379	0.151636	0.020076	0.283196	-0.0172115	-0.126192	0.0917694
5	0.0267431	-0.100742	0.154229	0.159664	0.0182755	0.301053	-0.0226686	-0.129592	0.0842548
6	-0.0137226	-0.152637	0.125191	0.141129	-0.0138995	0.296156	-0.0165629	-0.123667	0.0905415
7	-0.0187414	-0.157007	0.119524	0.132223	-0.0271106	0.291557	-0.0393198	-0.153421	0.0747816
8	0.0359741	-0.107079	0.179027	0.172088	0.0156627	0.328513	-0.0192072	-0.137071	0.0986564
9	0.0721373	-0.0750315	0.219306	0.164632	0.00530638	0.323958	0.0277815	-0.0935575	0.149121
10	0.124137	-0.0251109	0.273385	0.124796	-0.036091	0.285683	0.0405055	-0.081862	0.162873
11	0.145508	-0.00572898	0.296744	0.0820471	-0.0824238	0.246518	0.0269114	-0.0958723	0.149695
12	0.161983	0.00631401	0.317651	0.0154793	-0.149775	0.180734	0.0211269	-0.103354	0.145608
13	0.165113	0.0040396	0.326187	0.0149492	-0.146926	0.176824	0.0398377	-0.077672	0.157347
14	0.125807	-0.0364715	0.288085	0.0409827	-0.122672	0.204637	0.057881	-0.0617629	0.177525
15	0.118634	-0.0485938	0.285862	0.0953091	-0.0672597	0.257878	0.0281633	-0.0962098	0.152536
16	0.128002	-0.0387806	0.294785	0.0957759	-0.0753104	0.266862	0.0415402	-0.0865546	0.169635
17	0.140861	-0.0240873	0.305808	0.106295	-0.0662482	0.278839	0.0435064	-0.0931026	0.180115
18	0.143212	-0.0223771	0.308801	0.0870258	-0.08237	0.256422	0.0805424	-0.0571015	0.218186
19	0.133774	-0.0323743	0.299923	0.11558	-0.0558712	0.287032	0.0990061	-0.0400127	0.238025
20	0.145723	-0.0233351	0.314781	0.125946	-0.0481587	0.300051	0.089917	-0.0411223	0.220956
21	0.171868	0.000640343	0.343096	0.127769	-0.049597	0.305135	0.0555134	-0.07114	0.182167
22	0.169854	-0.000913292	0.340621	0.108895	-0.067105	0.284895	0.0755013	-0.0618959	0.212898
23	0.210417	0.0361876	0.384646	0.0660011	-0.117796	0.249799	0.0785002	-0.0674623	0.224463
24	0.237425	0.0619774	0.412873	0.0521695	-0.129542	0.23388	0.0450993	-0.0991612	0.18936
25	0.241517	0.0667461	0.416289	0.0823577	-0.0960456	0.260761	0.0567887	-0.0844193	0.197997
26	0.244986	0.067514	0.422457	0.109954	-0.0760085	0.295916	0.0856258	-0.0617845	0.233036
27	0.280169	0.10114	0.459198	0.13979	-0.0536481	0.333228	0.120363	-0.0341046	0.27483
28	0.256697	0.0794391	0.433955	0.187162	-0.00404903	0.378372	0.0933297	-0.0653358	0.251995
29	0.262578	0.088425	0.43673	0.203375	0.0123051	0.394444	0.0718832	-0.0958666	0.239633
30	0.273119	0.0967789	0.449459	0.220452	0.0256528	0.415251	0.0745315	-0.0998669	0.24893
31	0.269406	0.0932225	0.44559	0.245399	0.0480246	0.442774	0.0766832	-0.0812965	0.234663
32	0.224371	0.0472883	0.401455	0.257116	0.055899	0.458333	0.0994549	-0.0658793	0.264789
33	0.250217	0.070468	0.429965	0.254368	0.0557219	0.453014	0.0770483	-0.10668	0.260776
34	0.254051	0.0698724	0.438229	0.25951	0.0563361	0.462685	0.0827632	-0.0998414	0.265368
35	0.23042	0.0451691	0.415671	0.25408	0.051906	0.456254	0.0837029	-0.102484	0.26989
36	0.265994	0.0832785	0.44871	0.258086	0.0560013	0.460171	0.0980091	-0.0932588	0.289277
37	0.316989	0.130185	0.503792	0.270304	0.0646204	0.475987	0.109038	-0.0787519	0.296828
38	0.340188	0.144635	0.535741	0.291365	0.0935896	0.48914	0.131772	-0.0620655	0.325609
39	0.333396	0.129873	0.536919	0.313454	0.115872	0.511036	0.135627	-0.0607752	0.332029
40	0.312505	0.112701	0.512309	0.287513	0.0897457	0.485281	0.122454	-0.082695	0.327602
41	0.33567	0.137978	0.533362	0.260229	0.0594476	0.461011	0.101853	-0.106938	0.310645
42	0.340283	0.147404	0.533162	0.237516	0.0339674	0.441065	0.124058	-0.087198	0.335315
43	0.26976	0.0822841	0.457236	0.214333	0.00256716	0.426099	0.113396	-0.111781	0.338573
44	0.270348	0.0817354	0.458961	0.184318	-0.026112	0.394748	0.107278	-0.118889	0.333445
45	0.306325	0.115727	0.496924	0.162701	-0.0451985	0.370601	0.0916287	-0.133951	0.317209
46	0.334168	0.142805	0.52553	0.116396	-0.0915432	0.324335	0.0817635	-0.148353	0.31188
47	0.357776	0.164168	0.551385	0.115581	-0.100545	0.331707	0.137532	-0.0893846	0.364449
48	0.371142	0.173169	0.569115	0.126317	-0.0916422	0.344276	0.126535	-0.0994539	0.352524
49	0.386074	0.183858	0.588291	0.161907	-0.051289	0.375104	0.154154	-0.0767104	0.385019
50	0.365603	0.16716	0.564046	0.207856	-0.00258203	0.418295	0.168259	-0.067604	0.404122
51	0.407054	0.213228	0.60088	0.21171	-0.00107963	0.4245	0.1726	-0.0683545	0.413555
52	0.38673	0.189968	0.583492	0.202628	-0.0133178	0.418574	0.155397	-0.0763052	0.387098
53	0.37457	0.172983	0.576156	0.189786	-0.0217032	0.401276	0.127834	-0.103017	0.358684
54	0.408751	0.197314	0.620187	0.186644	-0.0250386	0.398326	0.15531	-0.0868453	0.397466
55	0.414795	0.201386	0.628204	0.235145	0.0202519	0.450037	0.178941	-0.0636416	0.421524
56	0.426273	0.21801	0.634536	0.254465	0.0439845	0.464946	0.2399	-0.0148434	0.494642
57	0.502109	0.301313	0.702905	0.232182	0.0243057	0.440059	0.272815	0.00874478	0.536885
58	0.572739	0.377294	0.768184	0.226646	0.0139617	0.439331	0.292661	0.0310168	0.554306
59	0.622457	0.422535	0.822379	0.202921	-0.0170851	0.422926	0.33524	0.0701044	0.600375
60	0.640082	0.435796	0.844367	0.179741	-0.0409518	0.400434	0.313506	0.0529486	0.574063
61	0.619169	0.410216	0.828122	0.169211	-0.0504222	0.388844	0.349591	0.0935629	0.605619
62	0.669234	0.451771	0.886696	0.20209	-0.0169382	0.421118	0.374185	0.115508	0.632862
63	0.691554	0.468745	0.914363	0.262461	0.0354682	0.489454	0.462428	0.192765	0.732091
64	0.687265	0.470985	0.903545	0.352237	0.122867	0.581607	0.491511	0.210465	0.772557
65	0.737283	0.517713	0.956854	0.458521	0.223138	0.693904	0.49935	0.214139	0.784562
66	0.764337	0.535207	0.993467	0.52975	0.294128	0.765371	0.551722	0.273418	0.830026
67	0.788471	0.552518	1.02442	0.530411	0.297757	0.763066	0.585928	0.314824	0.857031
68	0.815939	0.582248	1.04963	0.53853	0.307513	0.769548	0.568423	0.289529	0.847317
69	0.835544	0.607092	1.064	0.565717	0.332657	0.798777	0.531383	0.247915	0.81485
70	0.866118	0.643904	1.08833	0.615104	0.379117	0.851091	0.56724	0.279226	0.855253
71	0.872668	0.642407	1.10293	0.628736	0.385098	0.872373	0.637965	0.344476	0.931454
72	0.897938	0.667286	1.12859	0.688983	0.43476	0.943205	0.654135	0.365433	0.942837
73	0.947766	0.711692	1.18384	0.763957	0.501596	1.02632	0.665584	0.372114	0.959054
74	1.03944	0.795074	1.28381	0.814428	0.548026	1.08083	0.757296	0.45884	1.05575
75	1.10623	0.861616	1.35084	0.812433	0.547629	1.07724	0.784381	0.477771	1.09099
76	1.13162	0.885619	1.37762	0.855271	0.587652	1.12289	0.81729	0.509667	1.12491
77	1.13223	0.89213	1.37234	0.92235	0.656417	1.18828	0.881752	0.576037	1.18747
78	1.15366	0.914893	1.39242	0.924814	0.665036	1.18459	0.924458	0.618132	1.23078
79	1.18556	0.94481	1.4263	0.908199	0.64889	1.16751	0.880728	0.576693	1.18476
80	1.22528	0.982589	1.46797	0.944679	0.675291	1.21407	0.897954	0.59794	1.19797
81	1.26584	1.01355	1.51813	0.982509	0.709582	1.25544	0.948688	0.641836	1.25554
82	1.30866	1.05091	1.56641	0.998044	0.726766	1.26932	0.981272	0.675236	1.28731
83	1.35047	1.09399	1.60695	1.02406	0.749232	1.29888	1.00369	0.685305	1.32207
84	1.39601	1.1404	1.65162	1.01692	0.738446	1.2954	1.05151	0.728953	1.37407
85	1.45341	1.19663	1.71019	1.09327	0.81258	1.37396	1.06541	0.739771	1.39105
86	1.54431	1.28696	1.80166	1.15473	0.870821	1.43863	1.103	0.773873	1.43213
87	1.61604	1.35643	1.87565	1.18301	0.899734	1.46628	1.10916	0.782835	1.43548
88	1.63546	1.37873	1.89218	1.18665	0.908307	1.46499	1.13678	0.812023	1.46154
89	1.61143	1.34484	1.87801	1.17727	0.901273	1.45326	1.12051	0.78946	1.45155
90	1.64305	1.37352	1.91259	1.18773	0.911893	1.46357	1.14115	0.812117	1.47019
91	1.69833	1.43427	1.96239	1.20043	0.920393	1.48047	1.15065	0.8201	1.4812
92	1.72581	1.46191	1.98971	1.21551	0.932848	1.49818	1.13954	0.807936	1.47115
93	1.73351	1.47121	1.99581	1.20511	0.913876	1.49634	1.18141	0.845773	1.51705
94	1.76806	1.50243	2.03369	1.22511	0.925729	1.52449	1.21973	0.889871	1.5496
95	1.80672	1.54503	2.06841	1.27091	0.964719	1.57711	1.2224	0.89848	1.54632
96	1.84381	1.58387	2.10375	1.25087	0.949483	1.55226	1.21507	0.8771	1.55304
97	1.87433	1.61368	2.13498	1.31135	1.01209	1.61061	1.25322	0.904006	1.60243
98	1.89176	1.62488	2.15864	1.3331	1.03466	1.63155	1.28978	0.94406	1.63549
99	1.90589	1.63909	2.17268	1.35507	1.05278	1.65736	1.31683	0.971229	1.66243
100	1.92611	1.66117	2.19105	1.40641	1.10634	1.70647	1.388	1.02963	1.74638
101	1.92384	1.65982	2.18785	1.42596	1.12985	1.72206	1.41577	1.05022	1.78132
102	1.94974	1.68608	2.21339	1.4238	1.13582	1.71178	1.40525	1.04407	1.76643
103	1.98188	1.71845	2.24531	1.4486	1.15996	1.73725	1.47835	1.1212	1.83551
104	2.02534	1.76157	2.28912	1.47269	1.17914	1.76623	1.49174	1.13715	1.84634
105	2.04264	1.77862	2.30665	1.50678	1.21905	1.7945	1.54461	1.18673	1.9025
106	2.12577	1.86479	2.38676	1.59248	1.31136	1.8736	1.55801	1.2063	1.90972
107	2.18453	1.92165	2.44742	1.62726	1.35118	1.90335	1.57852	1.22039	1.93666
108	2.23055	1.96502	2.49608	1.61001	1.33648	1.88353	1.56211	1.1939	1.93031
109	2.23105	1.96122	2.50089	1.62246	1.33541	1.90951	1.64622	1.27232	2.02011
110	2.23653	1.96171	2.51136	1.66193	1.36356	1.96031	1.67664	1.3061	2.04717
111	2.24292	1.96726	2.51858	1.67095	1.3663	1.97561	1.64683	1.28263	2.01103
112	2.24498	1.96702	2.52295	1.69573	1.39	2.00147	1.70972	1.33886	2.08058
113	2.26013	1.97744	2.54283	1.73455	1.42639	2.04271	1.74308	1.3718	2.11436
114	2.27622	1.99715	2.55528	1.73915	1.42843	2.04986	1.76535	1.40379	2.12692
115	2.30317	2.02762	2.57871	1.74404	1.42952	2.05856	1.84346	1.48318	2.20374
116	2.36532	2.09174	2.6389	1.72795	1.402	2.05391	1.87199	1.5116	2.23238
117	2.42637	2.15199	2.70075	1.71039	1.38074	2.04004	1.83564	1.47137	2.19991
118	2.50102	2.23051	2.77152	1.7121	1.38389	2.04031	1.81704	1.45137	2.1827
119	2.55622	2.28665	2.82578	1.74351	1.41623	2.07078	1.87106	1.50512	2.23699
120	2.58225	2.31295	2.85155	1.76937	1.43805	2.10069	1.85806	1.4848	2.23131
121	2.54409	2.27476	2.81342	1.802	1.46532	2.13868	1.89705	1.51601	2.27808
122	2.56581	2.29217	2.83945	1.82313	1.47968	2.16659	1.92917	1.54522	2.31312
123	2.56449	2.282	2.84699	1.86416	1.51844	2.20988	1.94491	1.55863	2.33118
124	2.58511	2.29786	2.87235	1.89744	1.55526	2.23963	1.94803	1.57488	2.32118
125	2.64676	2.35603	2.93748	1.91861	1.57331	2.2639	1.97752	1.60502	2.35001
126	2.63325	2.34356	2.92294	1.96493	1.6133	2.31656	2.06427	1.68615	2.4424
127	2.62197	2.33649	2.90745	1.98362	1.63369	2.33354	2.09958	1.70909	2.49007
128	2.67107	2.38696	2.95518	2.02016	1.66147	2.37885	2.07373	1.68355	2.46391
129	2.72287	2.43818	3.00756	2.02941	1.66921	2.38962	2.13091	1.7329	2.52891
130	2.72844	2.44295	3.01392	2.0892	1.73103	2.44737	2.14649	1.75552	2.53745
131	2.75434	2.46328	3.0454	2.14537	1.78654	2.5042	2.15859	1.75921	2.55797
132	2.78207	2.4843	3.07984	2.13755	1.77875	2.49634	2.20192	1.80752	2.59632
133	2.80366	2.49844	3.10889	2.13686	1.78419	2.48953	2.21269	1.82513	2.60026
134	2.81903	2.51202	3.12604	2.1676	1.82125	2.51395	2.18672	1.78941	2.58404
135	2.84726	2.53999	3.15453	2.22285	1.87306	2.57264	2.18951	1.79074	2.58828
136	2.85725	2.55412	3.16038	2.22753	1.87128	2.58377	2.24315	1.8421	2.6442
137	2.8678	2.56922	3.16638	2.26974	1.91218	2.62729	2.24964	1.85479	2.6445
138	2.91228	2.60583	3.21874	2.26201	1.90248	2.62153	2.23605	1.84122	2.63088
139	2.94224	2.64147	3.24301	2.27578	1.91278	2.63877	2.21353	1.81117	2.61588
140	2.94591	2.64784	3.24399	2.27463	1.91684	2.63242	2.21955	1.80539	2.63371
141	2.98015	2.68296	3.27733	2.27473	1.92504	2.62441	2.21876	1.80003	2.63749
142	3.04546	2.75301	3.3379	2.31804	1.96889	2.66718	2.27409	1.8549	2.69327
143	3.06758	2.77585	3.35931	2.3703	2.01884	2.72176	2.35531	1.92578	2.78484
144	3.08049	2.78385	3.37713	2.41151	2.05419	2.76882	2.30571	1.87961	2.7318
145	3.13979	2.84049	3.43909	2.46121	2.09595	2.82648	2.35221	1.91924	2.78517
146	3.18082	2.87962	3.48202	2.51772	2.14588	2.88956	2.39145	1.94932	2.83359
147	3.20229	2.89299	3.51159	2.52395	2.15089	2.89701	2.39005	1.95388	2.82622
148	3.20091	2.88136	3.52047	2.52565	2.15255	2.89875	2.36867	1.92098	2.81635
149	3.17595	2.85269	3.49921	2.5517	2.17866	2.92474	2.36728	1.91449	2.82007
150	3.19743	2.87193	3.52293	2.57029	2.19507	2.9455	2.46095	2.0093	2.91259
151	3.19423	2.86467	3.52379	2.55281	2.16846	2.93716	2.47508	2.01629	2.93386
152	3.24164	2.91466	3.56861	2.57632	2.192	2.96063	2.41195	1.95724	2.86667
153	3.30077	2.97879	3.62274	2.5871	2.20218	2.97202	2.4072	1.96069	2.85372
154	3.33208	3.0122	3.65196	2.62934	2.24154	3.01715	2.43321	1.993	2.87342
155	3.34433	3.02333	3.66533	2.61191	2.21833	3.0055	2.47152	2.02616	2.91689
156	3.35117	3.02847	3.67388	2.61545	2.2219	3.009	2.48168	2.04556	2.91779
157	3.38061	3.05391	3.70731	2.64564	2.25134	3.03993	2.47125	2.03219	2.91031
158	3.38632	3.05339	3.71925	2.63018	2.22924	3.03113	2.47284	2.02761	2.91806
159	3.4293	3.09354	3.76506	2.6048	2.20693	3.00268	2.46597	2.02073	2.9112
160	3.44967	3.1127	3.78663	2.59863	2.19871	2.99854	2.46136	2.02335	2.89937
161	3.43483	3.10141	3.76824	2.62591	2.22188	3.02994	2.45676	2.01927	2.89425
162	3.43877	3.10199	3.77555	2.65655	2.25235	3.06075	2.45165	2.01093	2.89238
163	3.43408	3.0949	3.77326	2.63352	2.22657	3.04046	2.45757	2.01327	2.90186
164	3.4467	3.10246	3.79094	2.6209	2.2129	3.0289	2.47342	2.03755	2.9093
165	3.46567	3.11728	3.81406	2.62973	2.224	3.03546	2.49579	2.06509	2.92649
166	3.51973	3.16621	3.87325	2.67994	2.28267	3.07721	2.50205	2.06362	2.94047
167	3.57416	3.21899	3.92934	2.66805	2.27506	3.06105	2.53387	2.09238	2.97536
168	3.60417	3.24812	3.96023	2.68495	2.28915	3.08076	2.51104	2.07318	2.94889
169	3.61393	3.25902	3.96884	2.70765	2.31304	3.10226	2.54056	2.09359	2.98753
170	3.66087	3.30438	4.01737	2.76325	2.36822	3.15828	2.53014	2.08405	2.97623
171	3.64391	3.28449	4.00334	2.76122	2.3653	3.15714	2.50734	2.06804	2.94664
172	3.64489	3.28775	4.00204	2.77828	2.37927	3.1773	2.51581	2.06856	2.96306
173	3.65542	3.28957	4.02128	2.81953	2.4227	3.21636	2.52015	2.06896	2.97134
174	3.65377	3.28042	4.02711	2.83702	2.43852	3.23552	2.52529	2.07277	2.97781
175	3.61331	3.243	3.98363	2.86854	2.46758	3.26951	2.55745	2.10035	3.01454
176	3.61917	3.25398	3.98435	2.89124	2.48611	3.29637	2.52702	2.05805	2.99599
177	3.64982	3.28365	4.01599	2.88736	2.48995	3.28476	2.54277	2.07961	3.00592
178	3.66831	3.29892	4.0377	2.90004	2.50576	3.29431	2.55075	2.08465	3.01686
179	3.67829	3.30556	4.05103	2.94452	2.54258	3.34646	2.5697	2.09374	3.04567
180	3.67784	3.30195	4.05373	2.9871	2.58928	3.38491	2.60164	2.13449	3.0688
181	3.70533	3.32546	4.0852	3.0012	2.60438	3.39803	2.60961	2.14172	3.07749
182	3.74015	3.35933	4.12097	3.00727	2.60857	3.40597	2.63936	2.17064	3.10808
183	3.73879	3.35719	4.1204	3.01875	2.61133	3.42618	2.70312	2.22503	3.18122
184	3.77944	3.38874	4.17014	2.97755	2.56587	3.38923	2.67283	2.19076	3.15489
185	3.78521	3.39123	4.1792	2.96085	2.54086	3.38084	2.65253	2.17814	3.12693
186	3.76994	3.37637	4.16352	3.0071	2.58101	3.43319	2.69744	2.22564	3.16924
187	3.77694	3.38668	4.1672	3.08529	2.65107	3.51951	2.71195	2.23641	3.18748
188	3.7916	3.40852	4.17467	3.11022	2.67017	3.55027	2.73413	2.26232	3.20595
189	3.79481	3.40903	4.18058	3.15234	2.71154	3.59315	2.74169	2.26372	3.21967
190	3.8136	3.42342	4.20378	3.14855	2.70903	3.58806	2.72499	2.23774	3.21223
191	3.82727	3.42988	4.22466	3.11354	2.67207	3.55501	2.69088	2.19613	3.18563
192	3.86006	3.45843	4.26169	3.13537	2.69201	3.57874	2.68934	2.19547	3.18322
193	3.87048	3.4668	4.27417	3.1295	2.6927	3.5663	2.71766	2.23355	3.20177
194	3.88927	3.48442	4.29412	3.12837	2.69538	3.56135	2.71559	2.22586	3.20531
195	3.87258	3.46793	4.27724	3.13117	2.69965	3.56269	2.72344	2.23929	3.20758
196	3.88643	3.48509	4.28777	3.18077	2.74602	3.61553	2.71732	2.23133	3.20331
197	3.92635	3.53	4.3227	3.24952	2.81193	3.6871	2.75063	2.26571	3.23556
198	3.93795	3.54339	4.33251	3.2631	2.81845	3.70775	2.76822	2.27858	3.25786
199	3.95187	3.5604	4.34334	3.25148	2.80353	3.69944	2.73726	2.23896	3.23556
200	3.94516	3.55071	4.33961	3.24892	2.80039	3.69745	2.7246	2.22528	3.22392

## Sheet: S1_Panel_B
time	vHeadPosCh1_Pos1_units_Mean	vHeadPosCh1_Pos1_units_95ci_low	vHeadPosCh1_Pos1_units_95ci_up	vHeadPosCh1_Pos2_units_Mean	vHeadPosCh1_Pos2_units_95ci_low	vHeadPosCh1_Pos2_units_95ci_up	vHeadPosCh1_Pos3_units_Mean	vHeadPosCh1_Pos3_units_95ci_low	vHeadPosCh1_Pos3_units_95ci_up
-100	-7.2231e-06	-3.18475e-05	1.74013e-05	-4.73216e-05	-8.14878e-05	-1.31553e-05	1.22772e-05	-3.46606e-05	5.9215e-05
-99	4.51443e-06	-2.21395e-05	3.11683e-05	-4.53901e-05	-8.05494e-05	-1.02307e-05	2.28005e-05	-3.01273e-05	7.57283e-05
-98	1.89606e-05	-5.71266e-06	4.36339e-05	-2.89724e-05	-6.38906e-05	5.94586e-06	5.78782e-05	7.06626e-06	0.00010869
-97	8.12598e-06	-1.76723e-05	3.39242e-05	-3.47669e-05	-6.99658e-05	4.32109e-07	-5.26165e-06	-6.18411e-05	5.13178e-05
-96	1.08346e-05	-1.52429e-05	3.69122e-05	-1.64177e-05	-4.54453e-05	1.26099e-05	1.5785e-05	-3.76994e-05	6.92693e-05
-95	-1.44462e-05	-4.03634e-05	1.1471e-05	-3.86298e-05	-7.45381e-05	-2.72162e-06	3.33238e-05	-1.95809e-05	8.62285e-05
-94	-9.02887e-06	-3.58325e-05	1.77748e-05	-7.04995e-05	-0.000104109	-3.689e-05	5.26165e-06	-4.76482e-05	5.81715e-05
-93	1.80577e-06	-2.38376e-05	2.74491e-05	-4.82873e-05	-8.28898e-05	-1.36848e-05	3.68316e-05	-1.72965e-05	9.09596e-05
-92	-4.51443e-06	-3.04538e-05	2.14249e-05	-3.57326e-05	-6.66237e-05	-4.8415e-06	2.45544e-05	-2.95536e-05	7.86623e-05
-91	-9.02887e-06	-3.64105e-05	1.83527e-05	-2.51094e-05	-5.50215e-05	4.80271e-06	-1.40311e-05	-6.72047e-05	3.91425e-05
-90	-1.08346e-05	-3.63047e-05	1.46354e-05	-2.12464e-05	-5.69075e-05	1.44147e-05	-3.33238e-05	-8.73338e-05	2.06862e-05
-89	3.61155e-06	-2.4026e-05	3.12491e-05	-5.11845e-05	-8.55295e-05	-1.68396e-05	2.10466e-05	-3.20247e-05	7.41179e-05
-88	1.80577e-06	-2.20667e-05	2.56782e-05	-4.63558e-05	-8.18397e-05	-1.0872e-05	2.28005e-05	-3.54422e-05	8.10432e-05
-87	5.41732e-06	-2.11739e-05	3.20086e-05	-2.02807e-05	-5.38334e-05	1.32721e-05	-1.05233e-05	-6.32866e-05	4.224e-05
-86	-1.44462e-05	-4.18893e-05	1.29969e-05	-4.34586e-05	-7.93823e-05	-7.53488e-06	1.75388e-06	-5.22712e-05	5.57789e-05
-85	-9.02887e-07	-2.63635e-05	2.45577e-05	-4.44243e-05	-8.01692e-05	-8.6794e-06	-1.75388e-06	-5.39998e-05	5.0492e-05
-84	-2.70866e-06	-2.81663e-05	2.2749e-05	-2.31779e-05	-5.58732e-05	9.51739e-06	-5.26165e-06	-6.18411e-05	5.13178e-05
-83	-2.70866e-06	-2.75436e-05	2.21263e-05	-2.51094e-05	-5.80975e-05	7.87866e-06	1.40311e-05	-3.40051e-05	6.20672e-05
-82	-1.80577e-06	-2.67056e-05	2.3094e-05	-2.89724e-05	-5.97454e-05	1.80068e-06	1.05233e-05	-3.99507e-05	6.09973e-05
-81	-1.26404e-05	-3.89388e-05	1.36579e-05	-1.73834e-05	-5.15573e-05	1.67904e-05	-1.5785e-05	-6.6781e-05	3.52111e-05
-80	-9.02887e-07	-2.8375e-05	2.65693e-05	-3.09039e-05	-6.42053e-05	2.39754e-06	1.5785e-05	-3.54423e-05	6.70122e-05
-79	7.2231e-06	-1.79049e-05	3.23511e-05	-3.38011e-05	-7.00753e-05	2.47311e-06	1.92927e-05	-3.11839e-05	6.97694e-05
-78	1.80577e-06	-2.28412e-05	2.64528e-05	-4.05613e-05	-7.43602e-05	-6.76245e-06	1.5785e-05	-3.72556e-05	6.88255e-05
-77	1.80577e-05	-6.94605e-06	4.30615e-05	-3.66984e-05	-7.2255e-05	-1.14171e-06	3.15699e-05	-1.70788e-05	8.02186e-05
-76	1.98635e-05	-4.34501e-06	4.4072e-05	-2.60751e-05	-5.92076e-05	7.05731e-06	1.75388e-05	-3.90358e-05	7.41135e-05
-75	1.98635e-05	-5.72847e-06	4.54555e-05	-4.82873e-05	-8.15165e-05	-1.50582e-05	-5.26165e-06	-5.63535e-05	4.58302e-05
-74	9.02887e-07	-2.46804e-05	2.64862e-05	-3.09039e-05	-6.59867e-05	4.17894e-06	2.63083e-05	-2.1376e-05	7.39925e-05
-73	0	-2.70706e-05	2.70706e-05	-2.41437e-05	-6.05065e-05	1.22192e-05	1.75388e-06	-4.93486e-05	5.28563e-05
-72	9.02887e-07	-2.59932e-05	2.7799e-05	-3.09039e-05	-6.50552e-05	3.24742e-06	-7.01554e-06	-5.93549e-05	4.53239e-05
-71	1.17375e-05	-1.56779e-05	3.9153e-05	-3.66984e-05	-7.2556e-05	-8.40686e-07	2.45544e-05	-3.08485e-05	7.99572e-05
-70	-6.32021e-06	-3.20083e-05	1.93679e-05	-2.99381e-05	-6.38472e-05	3.97094e-06	3.50777e-06	-5.27635e-05	5.97791e-05
-69	1.80577e-06	-2.42014e-05	2.78129e-05	-3.66984e-05	-7.2456e-05	-9.40746e-07	2.10466e-05	-3.46326e-05	7.67258e-05
-68	3.61155e-06	-2.21493e-05	2.93724e-05	-1.64177e-05	-4.7817e-05	1.49816e-05	5.26165e-06	-4.7871e-05	5.83943e-05
-67	-3.61155e-06	-2.91281e-05	2.1905e-05	-2.31779e-05	-5.44161e-05	8.06031e-06	-1.75388e-06	-5.79237e-05	5.4416e-05
-66	8.12598e-06	-1.96594e-05	3.59113e-05	-3.18696e-05	-6.62608e-05	2.52154e-06	5.26165e-06	-5.00504e-05	6.05737e-05
-65	1.26404e-05	-1.26874e-05	3.79682e-05	-3.66984e-05	-7.26558e-05	-7.40904e-07	-1.5785e-05	-6.92693e-05	3.76994e-05
-64	9.93176e-06	-1.46075e-05	3.4471e-05	-5.50475e-05	-8.51218e-05	-2.49732e-05	1.5785e-05	-3.79199e-05	6.94898e-05
-63	1.80577e-05	-8.52446e-06	4.46399e-05	-4.34586e-05	-7.52555e-05	-1.16617e-05	1.75388e-05	-3.75543e-05	7.26319e-05
-62	2.16693e-05	-7.44101e-06	5.07796e-05	-2.22122e-05	-5.77078e-05	1.32835e-05	1.5785e-05	-3.94387e-05	7.10086e-05
-61	4.51443e-06	-2.16653e-05	3.06941e-05	-1.44862e-05	-4.64737e-05	1.75013e-05	0	-4.32101e-05	4.32101e-05
-60	-8.12598e-06	-3.38025e-05	1.75506e-05	-1.44862e-05	-4.72484e-05	1.8276e-05	-2.63083e-05	-7.80342e-05	2.54177e-05
-59	2.34751e-05	-4.39355e-06	5.13437e-05	-3.09039e-05	-6.35534e-05	1.74561e-06	-1.92927e-05	-6.63779e-05	2.77924e-05
-58	9.02887e-07	-2.51655e-05	2.69712e-05	-1.73834e-05	-5.15573e-05	1.67904e-05	1.05233e-05	-4.24635e-05	6.35101e-05
-57	-9.02887e-06	-3.62959e-05	1.82381e-05	-3.47669e-05	-6.84043e-05	-1.12939e-06	2.10466e-05	-3.73265e-05	7.94197e-05
-56	-8.12598e-06	-3.5342e-05	1.909e-05	-4.15271e-05	-7.67006e-05	-6.35357e-06	2.10466e-05	-3.42065e-05	7.62997e-05
-55	-6.32021e-06	-3.24914e-05	1.9851e-05	-2.80066e-05	-5.98876e-05	3.87431e-06	2.9816e-05	-2.40655e-05	8.36976e-05
-54	5.41732e-06	-2.09373e-05	3.1772e-05	-3.09039e-05	-6.5679e-05	3.87121e-06	-7.01554e-06	-5.77499e-05	4.37188e-05
-53	1.71549e-05	-7.2936e-06	4.16033e-05	-2.41437e-05	-5.88943e-05	1.0607e-05	3.15699e-05	-2.12705e-05	8.44104e-05
-52	9.02887e-06	-1.73033e-05	3.5361e-05	-3.18696e-05	-6.80875e-05	4.34829e-06	-8.76942e-06	-6.38477e-05	4.63089e-05
-51	5.41732e-06	-2.24393e-05	3.3274e-05	-3.57326e-05	-7.12628e-05	-2.02443e-07	0	-5.41356e-05	5.41356e-05
-50	1.17375e-05	-1.41503e-05	3.76254e-05	-1.06232e-05	-4.21968e-05	2.09504e-05	2.28005e-05	-2.92266e-05	7.48275e-05
-49	1.80577e-06	-2.23276e-05	2.59392e-05	-2.99381e-05	-6.54976e-05	5.62138e-06	-3.50777e-06	-5.06362e-05	4.36206e-05
-48	1.44462e-05	-1.19499e-05	4.08423e-05	-7.72597e-06	-4.08156e-05	2.53637e-05	2.45544e-05	-2.6866e-05	7.59748e-05
-47	3.61155e-06	-2.21493e-05	2.93724e-05	-1.25547e-05	-4.66226e-05	2.15132e-05	-1.22772e-05	-5.94661e-05	3.49117e-05
-46	2.70866e-06	-2.41847e-05	2.9602e-05	-2.02807e-05	-5.10482e-05	1.04869e-05	2.80621e-05	-2.48656e-05	8.09899e-05
-45	-9.93176e-06	-3.58368e-05	1.59733e-05	-3.86298e-05	-6.91439e-05	-8.11579e-06	4.38471e-05	-9.16531e-06	9.68595e-05
-44	-1.80577e-06	-2.89904e-05	2.53789e-05	-3.66984e-05	-6.94214e-05	-3.97532e-06	2.63083e-05	-1.93504e-05	7.19669e-05
-43	-2.70866e-06	-3.16222e-05	2.62049e-05	-2.60751e-05	-5.93156e-05	7.16527e-06	1.5785e-05	-3.05998e-05	6.21697e-05
-42	4.51443e-06	-1.94154e-05	2.84443e-05	-8.69172e-06	-4.46306e-05	2.72471e-05	1.05233e-05	-4.01842e-05	6.12308e-05
-41	1.80577e-06	-2.43215e-05	2.7933e-05	-2.80066e-05	-6.31995e-05	7.18621e-06	5.26165e-06	-4.60609e-05	5.65842e-05
-40	8.12598e-06	-1.87426e-05	3.49945e-05	-1.44862e-05	-4.80051e-05	1.90328e-05	7.01554e-06	-4.77512e-05	6.17822e-05
-39	-9.02887e-07	-2.75651e-05	2.57594e-05	-4.82873e-05	-8.23681e-05	-1.42065e-05	3.15699e-05	-1.80409e-05	8.11807e-05
-38	3.61155e-06	-2.28687e-05	3.00918e-05	-3.09039e-05	-6.4739e-05	2.93122e-06	2.28005e-05	-2.96789e-05	7.52798e-05
-37	3.61155e-06	-2.25115e-05	2.97346e-05	-2.80066e-05	-6.11007e-05	5.08746e-06	3.50777e-05	-1.49041e-05	8.50595e-05
-36	9.02887e-07	-2.43105e-05	2.61163e-05	-3.28354e-05	-6.75674e-05	1.89665e-06	1.40311e-05	-3.71033e-05	6.51654e-05
-35	-1.08346e-05	-3.73882e-05	1.5719e-05	-4.63558e-05	-7.82222e-05	-1.44894e-05	1.40311e-05	-3.1995e-05	6.00571e-05
-34	-1.71549e-05	-4.29739e-05	8.66421e-06	-2.51094e-05	-5.79887e-05	7.76987e-06	1.40311e-05	-3.77919e-05	6.58541e-05
-33	-9.93176e-06	-3.60775e-05	1.6214e-05	-3.66984e-05	-6.89804e-05	-4.41627e-06	-3.50777e-06	-5.21174e-05	4.51018e-05
-32	-4.51443e-06	-3.4382e-05	2.53531e-05	-3.38011e-05	-6.50905e-05	-2.51176e-06	0	-5.19068e-05	5.19068e-05
-31	-9.02887e-06	-3.45149e-05	1.64572e-05	-1.93149e-05	-5.33585e-05	1.47286e-05	1.22772e-05	-3.89924e-05	6.35468e-05
-30	-2.70866e-06	-2.85327e-05	2.31154e-05	-1.64177e-05	-5.06555e-05	1.78202e-05	1.75388e-05	-3.30829e-05	6.81606e-05
-29	2.43779e-05	-1.43035e-06	5.01862e-05	-3.47669e-05	-6.73218e-05	-2.21197e-06	7.01554e-06	-4.37188e-05	5.77499e-05
-28	2.70866e-06	-2.3596e-05	2.90134e-05	-1.64177e-05	-4.67727e-05	1.39373e-05	1.05233e-05	-4.29077e-05	6.39543e-05
-27	-9.02887e-06	-3.66383e-05	1.85805e-05	-2.51094e-05	-5.64259e-05	6.20712e-06	-2.10466e-05	-6.34764e-05	2.13832e-05
-26	3.61155e-06	-2.41391e-05	3.13622e-05	-4.34586e-05	-7.60347e-05	-1.08824e-05	2.9816e-05	-1.80246e-05	7.76567e-05
-25	-6.32021e-06	-3.16399e-05	1.89995e-05	9.65746e-07	-3.07641e-05	3.26955e-05	2.45544e-05	-2.52314e-05	7.43401e-05
-24	4.51443e-06	-2.24897e-05	3.15185e-05	-1.35204e-05	-4.3969e-05	1.69281e-05	5.26165e-06	-3.99396e-05	5.04629e-05
-23	7.2231e-06	-1.8276e-05	3.27222e-05	-4.82873e-06	-3.655e-05	2.68925e-05	1.22772e-05	-3.46606e-05	5.9215e-05
-22	6.32021e-06	-1.77309e-05	3.03713e-05	-2.41437e-05	-5.67671e-05	8.47978e-06	-7.01554e-06	-5.25968e-05	3.85657e-05
-21	0	-2.60086e-05	2.60086e-05	-1.64177e-05	-4.91577e-05	1.63223e-05	3.33238e-05	-1.34139e-05	8.00615e-05
-20	-1.08346e-05	-3.64273e-05	1.47581e-05	-2.51094e-05	-6.15056e-05	1.12868e-05	3.50777e-06	-4.31164e-05	5.0132e-05
-19	-5.41732e-06	-3.01791e-05	1.93444e-05	-3.86298e-05	-7.07457e-05	-6.51397e-06	2.28005e-05	-3.03501e-05	7.59511e-05
-18	9.02887e-07	-2.75767e-05	2.93825e-05	-1.06232e-05	-4.55379e-05	2.42915e-05	0	-4.71342e-05	4.71342e-05
-17	9.02887e-06	-1.75401e-05	3.55978e-05	-1.06232e-05	-4.40704e-05	2.2824e-05	0	-5.19068e-05	5.19068e-05
-16	1.80577e-05	-7.1953e-06	4.33108e-05	-1.64177e-05	-4.93758e-05	1.65405e-05	3.85854e-05	-1.60322e-05	9.32031e-05
-15	8.12598e-06	-1.92048e-05	3.54568e-05	-3.38011e-05	-6.73025e-05	-2.99758e-07	-1.5785e-05	-7.05789e-05	3.9009e-05
-14	2.43779e-05	-2.50027e-06	5.12562e-05	-1.1589e-05	-4.38837e-05	2.07058e-05	1.40311e-05	-3.84716e-05	6.65337e-05
-13	-7.2231e-06	-3.49577e-05	2.05115e-05	-1.44862e-05	-4.60224e-05	1.70501e-05	2.80621e-05	-1.74207e-05	7.35449e-05
-12	1.44462e-05	-1.43338e-05	4.32261e-05	-2.99381e-05	-6.1437e-05	1.5607e-06	2.9816e-05	-1.41637e-05	7.37957e-05
-11	1.26404e-05	-1.5163e-05	4.04438e-05	-3.09039e-05	-6.34434e-05	1.63569e-06	3.33238e-05	-2.15544e-05	8.8202e-05
-10	-2.70866e-06	-2.98339e-05	2.44166e-05	-4.53901e-05	-7.962e-05	-1.11602e-05	2.9816e-05	-2.29576e-05	8.25896e-05
-9	-8.12598e-06	-3.64693e-05	2.02173e-05	-3.76641e-05	-6.8846e-05	-6.48219e-06	4.73549e-05	-3.93596e-06	9.86457e-05
-8	1.80577e-05	-7.80793e-06	4.39234e-05	-5.79448e-06	-3.68843e-05	2.52953e-05	2.80621e-05	-1.44668e-05	7.0591e-05
-7	6.32021e-06	-1.99704e-05	3.26108e-05	-1.83492e-05	-5.08445e-05	1.41461e-05	-1.75388e-06	-5.09716e-05	4.74639e-05
-6	-2.70866e-06	-2.99491e-05	2.45318e-05	-1.35204e-05	-4.80495e-05	2.10086e-05	-1.5785e-05	-6.51322e-05	3.35623e-05
-5	-9.93176e-06	-3.70187e-05	1.71552e-05	-6.76022e-06	-4.27092e-05	2.91887e-05	-3.50777e-06	-5.23599e-05	4.53443e-05
-4	1.6252e-05	-1.05911e-05	4.3095e-05	-3.86298e-06	-3.93711e-05	3.16452e-05	1.05233e-05	-3.70583e-05	5.81049e-05
-3	3.61155e-06	-2.45869e-05	3.181e-05	-3.28354e-05	-6.37467e-05	-1.92408e-06	1.05233e-05	-3.99507e-05	6.09973e-05
-2	-1.35433e-05	-3.86742e-05	1.15876e-05	-2.70409e-05	-5.76232e-05	3.54146e-06	-5.26165e-06	-4.99369e-05	3.94136e-05
-1	-8.12598e-06	-3.42859e-05	1.80339e-05	-3.66984e-05	-6.7035e-05	-6.36168e-06	2.80621e-05	-1.55641e-05	7.16883e-05
0	0	0	0	0	0	0	0	0	0
1	5.41732e-06	-1.90902e-05	2.99248e-05	-1.44862e-05	-4.55647e-05	1.65923e-05	2.9816e-05	-1.65189e-05	7.61509e-05
2	1.08346e-05	-1.35037e-05	3.51729e-05	-1.1589e-05	-4.15828e-05	1.84049e-05	-5.26165e-06	-4.72085e-05	3.66852e-05
3	-1.35433e-05	-3.92898e-05	1.22032e-05	-1.83492e-05	-5.10642e-05	1.43659e-05	3.15699e-05	-1.87504e-05	8.18902e-05
4	-1.80577e-06	-2.7571e-05	2.39594e-05	-2.31779e-05	-5.53206e-05	8.96479e-06	5.26165e-06	-4.1734e-05	5.22573e-05
5	9.02887e-06	-1.73033e-05	3.5361e-05	-2.22122e-05	-5.88991e-05	1.44748e-05	7.01554e-06	-4.53239e-05	5.93549e-05
6	5.41732e-06	-1.88333e-05	2.96679e-05	-3.28354e-05	-6.52185e-05	-4.52285e-07	2.10466e-05	-2.2483e-05	6.45762e-05
7	1.35433e-05	-1.13372e-05	3.84238e-05	-4.05613e-05	-7.43602e-05	-6.76245e-06	2.10466e-05	-2.27536e-05	6.48468e-05
8	-3.61155e-06	-3.09071e-05	2.3684e-05	-3.47669e-05	-7.15585e-05	2.02473e-06	4.20932e-05	-9.28493e-06	9.34713e-05
9	-1.89606e-05	-4.48721e-05	6.95086e-06	-2.31779e-05	-5.6845e-05	1.04892e-05	4.5601e-05	3.74815e-06	8.74538e-05
10	-5.41732e-06	-3.31613e-05	2.23267e-05	-3.66984e-05	-6.83075e-05	-5.08921e-06	0	-4.29358e-05	4.29358e-05
11	1.26404e-05	-1.4363e-05	3.96438e-05	-4.82873e-06	-3.62093e-05	2.65518e-05	8.76942e-06	-3.58815e-05	5.34204e-05
12	9.02887e-07	-2.67963e-05	2.86021e-05	-1.25547e-05	-4.35382e-05	1.84288e-05	-7.01554e-06	-5.41266e-05	4.00956e-05
13	2.07664e-05	-4.50131e-06	4.60341e-05	-1.35204e-05	-4.38511e-05	1.68102e-05	0	-4.83715e-05	4.83715e-05
14	-3.61155e-06	-3.23599e-05	2.51368e-05	-2.02807e-05	-5.17392e-05	1.11778e-05	-5.26165e-06	-4.72085e-05	3.66852e-05
15	1.26404e-05	-1.37768e-05	3.90576e-05	-1.1589e-05	-4.04877e-05	1.73098e-05	3.50777e-06	-4.38707e-05	5.08862e-05
16	1.26404e-05	-1.11574e-05	3.64382e-05	-2.02807e-05	-5.23036e-05	1.17422e-05	-1.05233e-05	-5.44906e-05	3.3444e-05
17	9.02887e-07	-2.56416e-05	2.74474e-05	-1.64177e-05	-4.61766e-05	1.33413e-05	-7.01554e-06	-6.02504e-05	4.62193e-05
18	4.51443e-06	-2.16653e-05	3.06941e-05	-3.18696e-05	-6.12003e-05	-2.53895e-06	1.92927e-05	-2.95176e-05	6.81031e-05
19	0	-2.64858e-05	2.64858e-05	-2.31779e-05	-5.85068e-05	1.2151e-05	0	-5.00524e-05	5.00524e-05
20	-1.17375e-05	-3.73823e-05	1.39073e-05	1.93149e-06	-3.10703e-05	3.49333e-05	8.76942e-06	-3.91988e-05	5.67377e-05
21	-1.08346e-05	-3.75059e-05	1.58366e-05	-3.76641e-05	-7.17027e-05	-3.62554e-06	2.28005e-05	-2.13641e-05	6.69651e-05
22	5.41732e-06	-2.28854e-05	3.37201e-05	-3.76641e-05	-7.13854e-05	-3.9428e-06	0	-4.29358e-05	4.29358e-05
23	-3.61155e-06	-3.03273e-05	2.31042e-05	-1.54519e-05	-4.81486e-05	1.72447e-05	3.15699e-05	-1.32874e-05	7.64272e-05
24	-8.12598e-06	-3.36803e-05	1.74283e-05	-1.44862e-05	-4.51e-05	1.61277e-05	2.80621e-05	-1.99486e-05	7.60729e-05
25	3.61155e-06	-2.26311e-05	2.98542e-05	-1.93149e-05	-5.22892e-05	1.36594e-05	8.76942e-06	-4.11308e-05	5.86696e-05
26	0	-2.7186e-05	2.7186e-05	-9.65746e-06	-4.4218e-05	2.49031e-05	8.76942e-06	-3.89519e-05	5.64907e-05
27	-6.32021e-06	-3.16399e-05	1.89995e-05	-3.95956e-05	-6.91849e-05	-1.00063e-05	0	-4.73842e-05	4.73842e-05
28	-7.2231e-06	-3.33291e-05	1.88829e-05	-1.93149e-05	-5.2721e-05	1.40912e-05	3.15699e-05	-1.53476e-05	7.84874e-05
29	1.89606e-05	-8.36272e-06	4.6284e-05	-1.35204e-05	-4.65648e-05	1.95239e-05	-1.75388e-06	-4.28601e-05	3.93523e-05
30	-9.93176e-06	-3.39551e-05	1.40916e-05	-1.83492e-05	-5.22475e-05	1.55492e-05	1.92927e-05	-3.30233e-05	7.16088e-05
31	-6.32021e-06	-3.50034e-05	2.2363e-05	-2.80066e-05	-6.16377e-05	5.62443e-06	1.5785e-05	-3.42756e-05	6.58455e-05
32	-1.89606e-05	-4.55874e-05	7.66615e-06	-2.70409e-05	-5.88859e-05	4.80412e-06	1.22772e-05	-3.49117e-05	5.94661e-05
33	-5.41732e-06	-3.25911e-05	2.17564e-05	-2.12464e-05	-5.2288e-05	9.79518e-06	1.05233e-05	-3.4768e-05	5.58146e-05
34	-2.07664e-05	-4.8402e-05	6.86917e-06	-2.60751e-05	-5.98502e-05	7.69991e-06	-1.5785e-05	-5.78966e-05	2.63267e-05
35	-1.80577e-06	-2.96731e-05	2.60615e-05	-1.1589e-05	-4.9403e-05	2.62251e-05	2.45544e-05	-2.66357e-05	7.57445e-05
36	2.70866e-06	-2.41847e-05	2.9602e-05	-2.99381e-05	-6.12086e-05	1.33238e-06	3.50777e-06	-4.74749e-05	5.44905e-05
37	-9.02887e-07	-2.81461e-05	2.63403e-05	-3.57326e-05	-7.09589e-05	-5.06267e-07	2.63083e-05	-2.18691e-05	7.44856e-05
38	-1.80577e-06	-2.73267e-05	2.37152e-05	-2.12464e-05	-5.18228e-05	9.33001e-06	-3.50777e-06	-5.06362e-05	4.36206e-05
39	9.02887e-06	-1.48063e-05	3.2864e-05	-2.60751e-05	-5.88816e-05	6.73128e-06	7.01554e-06	-3.83057e-05	5.23368e-05
40	8.12598e-06	-1.77934e-05	3.40453e-05	-2.22122e-05	-5.50876e-05	1.06633e-05	-2.63083e-05	-7.14463e-05	1.88298e-05
41	-6.32021e-06	-3.389e-05	2.12496e-05	-1.1589e-05	-4.04877e-05	1.73098e-05	2.63083e-05	-3.04294e-05	8.30459e-05
42	0	-2.67213e-05	2.67213e-05	-2.31779e-05	-5.39539e-05	7.59811e-06	2.45544e-05	-2.61719e-05	7.52807e-05
43	1.53491e-05	-1.01297e-05	4.08279e-05	-3.38011e-05	-6.53187e-05	-2.28357e-06	2.63083e-05	-1.80374e-05	7.0654e-05
44	1.80577e-06	-2.40807e-05	2.76922e-05	-1.54519e-05	-4.78182e-05	1.69143e-05	0	-5.36972e-05	5.36972e-05
45	2.70866e-06	-2.45318e-05	2.99491e-05	-3.47669e-05	-6.6542e-05	-2.99171e-06	8.76942e-06	-4.45648e-05	6.21037e-05
46	1.80577e-06	-2.32195e-05	2.6831e-05	-1.44862e-05	-5.10717e-05	2.20993e-05	-3.50777e-06	-4.50381e-05	3.80225e-05
47	5.41732e-06	-2.22136e-05	3.30482e-05	-2.41437e-05	-5.88943e-05	1.0607e-05	1.75388e-06	-4.67382e-05	5.0246e-05
48	9.93176e-06	-1.57304e-05	3.55939e-05	0	-3.11029e-05	3.11029e-05	2.10466e-05	-2.68763e-05	6.89695e-05
49	1.08346e-05	-1.76534e-05	3.93227e-05	-2.89724e-05	-5.95117e-05	1.56693e-06	1.75388e-05	-3.37785e-05	6.88561e-05
50	1.26404e-05	-1.49368e-05	4.02176e-05	-1.25547e-05	-4.44499e-05	1.93405e-05	8.76942e-06	-4.11308e-05	5.86696e-05
51	-7.2231e-06	-3.39222e-05	1.9476e-05	-1.44862e-05	-4.43896e-05	1.54172e-05	5.26165e-06	-4.65194e-05	5.70427e-05
52	9.02887e-07	-2.31667e-05	2.49725e-05	-2.12464e-05	-5.01358e-05	7.64295e-06	1.75388e-05	-2.9451e-05	6.45287e-05
53	9.02887e-06	-1.76577e-05	3.57154e-05	-1.25547e-05	-4.38832e-05	1.87738e-05	-2.45544e-05	-7.06424e-05	2.15336e-05
54	-4.51443e-06	-3.22056e-05	2.31767e-05	-7.72597e-06	-3.90352e-05	2.35833e-05	1.75388e-05	-2.41188e-05	5.91965e-05
55	-1.80577e-06	-2.80526e-05	2.44411e-05	-3.28354e-05	-7.04402e-05	4.76946e-06	-2.9816e-05	-7.45946e-05	1.49625e-05
56	4.51443e-06	-2.27206e-05	3.17495e-05	-2.31779e-05	-5.57634e-05	9.40762e-06	-3.50777e-06	-5.1135e-05	4.41195e-05
57	-5.41732e-06	-3.05556e-05	1.9721e-05	-4.73216e-05	-8.15925e-05	-1.30506e-05	2.80621e-05	-2.06814e-05	7.68057e-05
58	9.93176e-06	-1.74999e-05	3.73634e-05	-2.60751e-05	-5.78835e-05	5.73317e-06	-1.22772e-05	-5.74183e-05	3.28639e-05
59	-1.26404e-05	-3.97595e-05	1.44787e-05	-3.66984e-05	-7.20529e-05	-1.34382e-06	-5.26165e-06	-5.83943e-05	4.7871e-05
60	-9.02887e-06	-3.45149e-05	1.64572e-05	-2.22122e-05	-5.49785e-05	1.05542e-05	1.40311e-05	-4.02423e-05	6.83045e-05
61	-6.32021e-06	-3.27297e-05	2.00892e-05	-1.35204e-05	-4.25226e-05	1.54817e-05	-1.92927e-05	-6.5363e-05	2.67776e-05
62	-9.93176e-06	-3.94529e-05	1.95894e-05	-1.06232e-05	-4.37474e-05	2.2501e-05	1.05233e-05	-3.50281e-05	5.60747e-05
63	-8.12598e-06	-3.62474e-05	1.99955e-05	-2.60751e-05	-5.8108e-05	5.95766e-06	-2.45544e-05	-7.66597e-05	2.75509e-05
64	-7.2231e-06	-3.22261e-05	1.77799e-05	-4.15271e-05	-7.40545e-05	-8.99972e-06	2.10466e-05	-2.97493e-05	7.18425e-05
65	9.02887e-07	-2.48025e-05	2.66083e-05	-2.70409e-05	-5.64283e-05	2.34655e-06	5.26165e-06	-4.4423e-05	5.49463e-05
66	1.53491e-05	-1.14477e-05	4.21458e-05	-3.09039e-05	-6.12794e-05	-5.28359e-07	-1.75388e-05	-6.72181e-05	3.21404e-05
67	2.70866e-06	-2.64207e-05	3.18381e-05	-2.70409e-05	-5.78567e-05	3.77488e-06	-3.50777e-06	-5.74196e-05	5.0404e-05
68	9.02887e-06	-1.53262e-05	3.33839e-05	-2.31779e-05	-5.37202e-05	7.36438e-06	-5.26165e-06	-5.09827e-05	4.04594e-05
69	-6.32021e-06	-3.06303e-05	1.79899e-05	-3.18696e-05	-6.64685e-05	2.72927e-06	-3.50777e-06	-5.37903e-05	4.67748e-05
70	2.43779e-05	-1.18651e-06	4.99424e-05	-1.83492e-05	-5.21417e-05	1.54433e-05	1.75388e-06	-4.02059e-05	4.37137e-05
71	7.2231e-06	-1.86419e-05	3.3088e-05	-2.51094e-05	-5.80975e-05	7.87866e-06	8.76942e-06	-3.91988e-05	5.67377e-05
72	-6.32021e-06	-3.21299e-05	1.94895e-05	-2.70409e-05	-6.05311e-05	6.44929e-06	-7.01554e-06	-6.00279e-05	4.59969e-05
73	-2.43779e-05	-5.18326e-05	3.07666e-06	-3.95956e-05	-7.50261e-05	-4.16513e-06	-2.10466e-05	-7.18425e-05	2.97493e-05
74	-1.53491e-05	-4.43893e-05	1.36911e-05	-2.22122e-05	-5.36389e-05	9.21459e-06	-5.26165e-06	-5.47079e-05	4.41846e-05
75	-3.61155e-06	-3.05607e-05	2.33376e-05	-1.54519e-05	-5.01683e-05	1.92644e-05	1.75388e-05	-3.66895e-05	7.17672e-05
76	-2.70866e-06	-2.84112e-05	2.29939e-05	-1.93149e-05	-5.15196e-05	1.28898e-05	3.85854e-05	-1.7946e-05	9.51168e-05
77	9.02887e-06	-1.96924e-05	3.77502e-05	-3.57326e-05	-6.96109e-05	-1.85431e-06	1.92927e-05	-3.165e-05	7.02354e-05
78	2.70866e-06	-2.43009e-05	2.97182e-05	-2.80066e-05	-6.1424e-05	5.41068e-06	-1.05233e-05	-6.05268e-05	3.94802e-05
79	-1.80577e-06	-3.00082e-05	2.63966e-05	-2.41437e-05	-5.49598e-05	6.67249e-06	2.9816e-05	-1.90027e-05	7.86347e-05
80	9.93176e-06	-1.58521e-05	3.57156e-05	-4.44243e-05	-7.73518e-05	-1.14968e-05	7.01554e-06	-4.20613e-05	5.60923e-05
81	-2.70866e-06	-2.85327e-05	2.31154e-05	-3.38011e-05	-6.22096e-05	-5.39261e-06	-2.45544e-05	-7.64324e-05	2.73236e-05
82	-1.6252e-05	-3.97347e-05	7.23073e-06	-3.38011e-05	-6.35646e-05	-4.03759e-06	3.15699e-05	-2.05953e-05	8.37351e-05
83	-9.02887e-06	-3.50018e-05	1.6944e-05	-3.66984e-05	-6.92017e-05	-4.19505e-06	2.28005e-05	-2.69033e-05	7.25043e-05
84	-6.32021e-06	-3.20083e-05	1.93679e-05	-3.76641e-05	-6.7675e-05	-7.65322e-06	1.5785e-05	-3.8576e-05	7.01459e-05
85	1.35433e-05	-1.31585e-05	4.02451e-05	-2.31779e-05	-5.62003e-05	9.84451e-06	5.26165e-06	-4.65194e-05	5.70427e-05
86	1.35433e-05	-1.18356e-05	3.89222e-05	-1.54519e-05	-4.75961e-05	1.66922e-05	-1.05233e-05	-6.43948e-05	4.33482e-05
87	9.02887e-06	-1.71841e-05	3.52418e-05	-2.80066e-05	-6.13166e-05	5.30329e-06	1.40311e-05	-4.08916e-05	6.89538e-05
88	-9.93176e-06	-3.69029e-05	1.70394e-05	-2.70409e-05	-5.98829e-05	5.80112e-06	1.75388e-05	-3.64711e-05	7.15488e-05
89	5.41732e-06	-1.99689e-05	3.08036e-05	-4.24928e-05	-7.2526e-05	-1.24597e-05	8.76942e-06	-4.43428e-05	6.18817e-05
90	1.35433e-05	-1.36236e-05	4.07102e-05	-2.80066e-05	-6.40047e-05	7.99147e-06	2.63083e-05	-2.3319e-05	7.59355e-05
91	-4.51443e-06	-2.93434e-05	2.03146e-05	-4.44243e-05	-7.76767e-05	-1.1172e-05	5.26165e-06	-4.48965e-05	5.54198e-05
92	-1.80577e-06	-3.00082e-05	2.63966e-05	-3.09039e-05	-6.38809e-05	2.07319e-06	-1.92927e-05	-6.71249e-05	2.85394e-05
93	2.70866e-05	2.09082e-07	5.39641e-05	-1.1589e-05	-4.35491e-05	2.03712e-05	3.50777e-05	-1.27289e-05	8.28843e-05
94	7.2231e-06	-1.9476e-05	3.39222e-05	-3.86298e-06	-3.62026e-05	2.84767e-05	-7.01554e-06	-5.70462e-05	4.30151e-05
95	-7.2231e-06	-3.56271e-05	2.1181e-05	-4.63558e-05	-8.16372e-05	-1.10745e-05	2.63083e-05	-2.30803e-05	7.56968e-05
96	-1.6252e-05	-4.44603e-05	1.19563e-05	-2.02807e-05	-5.56022e-05	1.50408e-05	1.92927e-05	-3.34731e-05	7.20586e-05
97	1.08346e-05	-1.66463e-05	3.83156e-05	-4.15271e-05	-7.3161e-05	-9.8932e-06	8.76942e-06	-4.20692e-05	5.9608e-05
98	9.02887e-07	-2.58766e-05	2.76823e-05	-1.54519e-05	-4.96484e-05	1.87445e-05	1.05233e-05	-4.13364e-05	6.2383e-05
99	9.93176e-06	-1.72706e-05	3.71341e-05	-3.18696e-05	-6.52027e-05	1.46344e-06	1.05233e-05	-4.1108e-05	6.21546e-05
100	2.97953e-05	5.49507e-06	5.40955e-05	-2.60751e-05	-5.99561e-05	7.80583e-06	-2.10466e-05	-7.65132e-05	3.442e-05
101	4.51443e-06	-1.95459e-05	2.85748e-05	-1.73834e-05	-5.08153e-05	1.60485e-05	5.26165e-06	-4.8314e-05	5.88373e-05
102	-5.41732e-06	-3.10491e-05	2.02145e-05	-2.60751e-05	-5.93156e-05	7.16527e-06	-1.22772e-05	-6.35468e-05	3.89924e-05
103	0	-2.78686e-05	2.78686e-05	-2.41437e-05	-5.57632e-05	7.47589e-06	-7.01554e-06	-5.60923e-05	4.20613e-05
104	1.53491e-05	-1.0737e-05	4.14352e-05	-3.09039e-05	-6.06838e-05	-1.12397e-06	-2.10466e-05	-7.36707e-05	3.15775e-05
105	1.44462e-05	-9.32825e-06	3.82206e-05	-2.41437e-05	-5.88943e-05	1.0607e-05	-1.75388e-06	-5.21578e-05	4.86501e-05
106	4.51443e-06	-2.32896e-05	3.23185e-05	-2.70409e-05	-5.80883e-05	4.00655e-06	1.92927e-05	-3.11839e-05	6.97694e-05
107	-1.44462e-05	-3.91255e-05	1.02331e-05	-3.18696e-05	-6.61564e-05	2.4172e-06	2.45544e-05	-2.37862e-05	7.2895e-05
108	2.70866e-06	-2.58781e-05	3.12954e-05	-1.1589e-05	-4.48672e-05	2.16893e-05	-1.05233e-05	-5.55529e-05	3.45063e-05
109	-9.02887e-07	-2.80309e-05	2.62251e-05	-2.99381e-05	-6.20007e-05	2.1244e-06	-4.03393e-05	-9.45752e-05	1.38965e-05
110	6.32021e-06	-2.11357e-05	3.37762e-05	-3.28354e-05	-6.44345e-05	-1.23627e-06	7.01554e-06	-4.10885e-05	5.51195e-05
111	3.61155e-06	-2.32211e-05	3.04442e-05	-2.41437e-05	-5.76342e-05	9.34687e-06	-1.92927e-05	-6.9299e-05	3.07135e-05
112	-7.2231e-06	-3.15918e-05	1.71456e-05	-1.1589e-05	-4.68536e-05	2.36757e-05	3.50777e-06	-4.48581e-05	5.18736e-05
113	-4.51443e-06	-2.9217e-05	2.01881e-05	-1.25547e-05	-4.47851e-05	1.96757e-05	1.75388e-06	-4.69813e-05	5.04891e-05
114	-9.02887e-06	-3.73107e-05	1.92529e-05	-3.28354e-05	-6.48848e-05	-7.8593e-07	1.75388e-06	-4.95793e-05	5.30871e-05
115	8.12598e-06	-1.99955e-05	3.62474e-05	-1.93149e-05	-5.18517e-05	1.32219e-05	1.05233e-05	-3.77976e-05	5.88442e-05
116	4.51443e-06	-2.04404e-05	2.94693e-05	-2.31779e-05	-5.88097e-05	1.24539e-05	-1.40311e-05	-6.44673e-05	3.64052e-05
117	1.44462e-05	-1.09831e-05	3.98755e-05	-3.47669e-05	-6.86167e-05	-9.17026e-07	-3.50777e-06	-5.76383e-05	5.06228e-05
118	1.6252e-05	-9.51968e-06	4.20236e-05	-2.99381e-05	-6.36352e-05	3.75895e-06	3.50777e-06	-4.63025e-05	5.3318e-05
119	3.61155e-06	-2.34535e-05	3.06766e-05	-1.35204e-05	-4.75267e-05	2.04858e-05	8.76942e-06	-4.45648e-05	6.21037e-05
120	0	-2.43931e-05	2.43931e-05	-2.60751e-05	-5.98502e-05	7.69991e-06	5.26165e-06	-4.29749e-05	5.34982e-05
121	3.61155e-06	-2.27501e-05	2.99732e-05	-1.44862e-05	-4.81119e-05	1.91395e-05	-7.01554e-06	-5.65716e-05	4.25405e-05
122	-1.80577e-06	-2.94474e-05	2.58358e-05	-1.54519e-05	-4.75961e-05	1.66922e-05	8.76942e-06	-4.6523e-05	6.40619e-05
123	1.35433e-05	-1.32756e-05	4.03622e-05	-1.73834e-05	-4.88271e-05	1.40603e-05	0	-4.7633e-05	4.7633e-05
124	1.80577e-06	-2.32195e-05	2.6831e-05	-1.73834e-05	-4.8713e-05	1.39461e-05	5.26165e-06	-4.91891e-05	5.97124e-05
125	6.32021e-06	-1.77309e-05	3.03713e-05	-2.99381e-05	-6.39527e-05	4.07644e-06	-2.9816e-05	-8.47832e-05	2.51512e-05
126	8.12598e-06	-1.909e-05	3.5342e-05	-6.27735e-05	-9.47992e-05	-3.07478e-05	-8.76942e-06	-6.32003e-05	4.56614e-05
127	-3.61155e-06	-3.00918e-05	2.28687e-05	-1.93149e-05	-5.34636e-05	1.48337e-05	-8.76942e-06	-5.42074e-05	3.66686e-05
128	1.35433e-05	-1.4194e-05	4.12806e-05	-2.22122e-05	-5.38661e-05	9.44179e-06	-1.05233e-05	-6.73829e-05	4.63363e-05
129	-9.02887e-06	-3.48809e-05	1.68232e-05	-1.25547e-05	-4.86648e-05	2.35554e-05	2.9816e-05	-2.18258e-05	8.14579e-05
130	1.53491e-05	-1.14477e-05	4.21458e-05	-2.51094e-05	-5.75499e-05	7.33106e-06	-3.33238e-05	-8.53273e-05	1.86797e-05
131	-2.70866e-06	-2.8043e-05	2.26257e-05	7.72597e-06	-2.53637e-05	4.08156e-05	-1.92927e-05	-6.48471e-05	2.62617e-05
132	6.32021e-06	-2.09067e-05	3.35471e-05	-4.82873e-06	-3.69986e-05	2.73411e-05	0	-4.88576e-05	4.88576e-05
133	9.02887e-07	-2.46804e-05	2.64862e-05	-3.76641e-05	-7.05244e-05	-4.8038e-06	-3.33238e-05	-8.48709e-05	1.82233e-05
134	-1.6252e-05	-4.4349e-05	1.18451e-05	-2.80066e-05	-6.17441e-05	5.7308e-06	8.76942e-06	-3.82031e-05	5.57419e-05
135	-6.32021e-06	-3.56512e-05	2.30108e-05	-3.28354e-05	-6.5439e-05	-2.31752e-07	1.75388e-05	-3.62519e-05	7.13296e-05
136	1.17375e-05	-1.73409e-05	4.0816e-05	-1.06232e-05	-4.57425e-05	2.44961e-05	-5.26165e-06	-5.42276e-05	4.37043e-05
137	3.61155e-06	-2.31042e-05	3.03273e-05	-2.80066e-05	-6.08835e-05	4.87022e-06	-7.01554e-06	-5.65716e-05	4.25405e-05
138	1.17375e-05	-1.41503e-05	3.76254e-05	-4.82873e-06	-3.85218e-05	2.88643e-05	8.76942e-06	-4.06549e-05	5.81937e-05
139	1.17375e-05	-1.47483e-05	3.82234e-05	-2.89724e-06	-3.59516e-05	3.01571e-05	1.22772e-05	-3.8062e-05	6.26164e-05
140	1.80577e-06	-2.3094e-05	2.67056e-05	-2.70409e-05	-6.46626e-05	1.05808e-05	8.76942e-06	-4.96409e-05	6.71798e-05
141	-3.61155e-06	-3.14748e-05	2.42517e-05	-2.31779e-05	-5.60916e-05	9.73583e-06	1.92927e-05	-3.32487e-05	7.18341e-05
142	-9.02887e-06	-3.58325e-05	1.77748e-05	-1.93149e-06	-3.74435e-05	3.35805e-05	-1.92927e-05	-7.44671e-05	3.58817e-05
143	-2.07664e-05	-4.65251e-05	4.9923e-06	-2.31779e-05	-5.71628e-05	1.0807e-05	2.80621e-05	-2.18789e-05	7.80031e-05
144	0	-2.75294e-05	2.75294e-05	-1.93149e-05	-5.31473e-05	1.45175e-05	-1.05233e-05	-6.52652e-05	4.42186e-05
145	1.26404e-05	-1.413e-05	3.94109e-05	-1.73834e-05	-5.1662e-05	1.68951e-05	5.26165e-06	-4.53655e-05	5.58888e-05
146	8.12598e-06	-1.88589e-05	3.51108e-05	-1.93149e-05	-5.22892e-05	1.36594e-05	3.15699e-05	-2.01403e-05	8.32801e-05
147	2.70866e-06	-2.29939e-05	2.84112e-05	-1.73834e-05	-5.18704e-05	1.71035e-05	7.01554e-06	-5.23085e-05	6.63396e-05
148	9.02887e-07	-2.8229e-05	3.00348e-05	-2.22122e-05	-5.53049e-05	1.08806e-05	-3.50777e-06	-6.08195e-05	5.38039e-05
149	2.25722e-05	-4.45798e-06	4.96023e-05	-2.31779e-05	-5.49844e-05	8.62863e-06	1.75388e-06	-4.372e-05	4.72277e-05
150	1.08346e-05	-1.58366e-05	3.75059e-05	5.79448e-06	-2.63158e-05	3.79047e-05	3.50777e-06	-5.17035e-05	5.87191e-05
151	-1.44462e-05	-4.24541e-05	1.35617e-05	1.93149e-06	-2.90545e-05	3.29175e-05	3.50777e-05	-1.46671e-05	8.48225e-05
152	-7.2231e-06	-3.54058e-05	2.09596e-05	-1.25547e-05	-4.44499e-05	1.93405e-05	-8.76942e-06	-6.05295e-05	4.29906e-05
153	2.70866e-05	-2.53014e-07	5.44262e-05	3.86298e-06	-2.78049e-05	3.55309e-05	2.80621e-05	-2.68383e-05	8.29626e-05
154	7.2231e-06	-1.85205e-05	3.29667e-05	-1.54519e-05	-4.40573e-05	1.31535e-05	-1.22772e-05	-6.90172e-05	4.44629e-05
155	1.71549e-05	-1.07623e-05	4.5072e-05	-2.12464e-05	-5.44086e-05	1.19158e-05	1.75388e-06	-4.47478e-05	4.82556e-05
156	2.70866e-06	-2.3596e-05	2.90134e-05	-2.70409e-05	-6.16879e-05	7.60614e-06	1.22772e-05	-3.68743e-05	6.14286e-05
157	3.61155e-06	-2.27501e-05	2.99732e-05	-4.24928e-05	-7.73825e-05	-7.60317e-06	-2.45544e-05	-7.90974e-05	2.99886e-05
158	-2.70866e-06	-2.8043e-05	2.26257e-05	-2.31779e-05	-5.60916e-05	9.73583e-06	-8.76942e-06	-6.21037e-05	4.45648e-05
159	1.17375e-05	-1.40291e-05	3.75041e-05	-2.70409e-05	-5.9554e-05	5.47218e-06	-1.75388e-05	-6.99949e-05	3.49172e-05
160	4.51443e-06	-2.45021e-05	3.3531e-05	-3.86298e-06	-3.90671e-05	3.13411e-05	2.45544e-05	-2.54682e-05	7.45769e-05
161	-2.70866e-06	-3.12954e-05	2.58781e-05	-2.12464e-05	-5.57846e-05	1.32918e-05	2.10466e-05	-2.66291e-05	6.87223e-05
162	1.80577e-06	-2.5031e-05	2.86426e-05	-1.93149e-06	-3.43859e-05	3.05229e-05	1.05233e-05	-4.33482e-05	6.43948e-05
163	0	-2.88623e-05	2.88623e-05	-9.65746e-06	-4.54404e-05	2.61255e-05	-1.75388e-06	-4.82556e-05	4.47478e-05
164	2.07664e-05	-5.35449e-06	4.68873e-05	-1.93149e-05	-5.34636e-05	1.48337e-05	1.05233e-05	-4.52875e-05	6.63341e-05
165	9.02887e-06	-1.60858e-05	3.41436e-05	-1.44862e-05	-4.75748e-05	1.86024e-05	3.50777e-06	-4.79364e-05	5.4952e-05
166	-1.98635e-05	-4.52096e-05	5.48255e-06	-1.54519e-05	-4.93326e-05	1.84287e-05	3.50777e-06	-4.72426e-05	5.42582e-05
167	-1.53491e-05	-4.28381e-05	1.21399e-05	-2.31779e-05	-5.58732e-05	9.51739e-06	3.68316e-05	-1.2976e-05	8.66391e-05
168	-1.71549e-05	-4.5072e-05	1.07623e-05	-2.70409e-05	-5.86601e-05	4.5783e-06	8.76942e-06	-4.67363e-05	6.42752e-05
169	1.80577e-06	-2.45601e-05	2.81717e-05	-3.09039e-05	-6.40975e-05	2.28977e-06	1.5785e-05	-3.68082e-05	6.83781e-05
170	-1.6252e-05	-4.37861e-05	1.12822e-05	-1.64177e-05	-5.14827e-05	1.86474e-05	1.05233e-05	-4.17901e-05	6.28367e-05
171	2.07664e-05	-4.74799e-06	4.62808e-05	-1.83492e-05	-5.22475e-05	1.55492e-05	7.01554e-06	-4.44128e-05	5.84439e-05
172	-4.51443e-06	-3.14023e-05	2.23734e-05	5.79448e-06	-2.68689e-05	3.84579e-05	8.76942e-06	-4.18362e-05	5.93751e-05
173	9.02887e-07	-2.35539e-05	2.53597e-05	0	-2.99288e-05	2.99288e-05	-5.26165e-06	-5.47079e-05	4.41846e-05
174	8.12598e-06	-1.80339e-05	3.42859e-05	-8.69172e-06	-4.02797e-05	2.28963e-05	2.10466e-05	-3.18016e-05	7.38948e-05
175	8.12598e-06	-1.92048e-05	3.54568e-05	-1.83492e-05	-5.11736e-05	1.44752e-05	1.22772e-05	-3.92224e-05	6.37768e-05
176	9.93176e-06	-1.79528e-05	3.78163e-05	-1.73834e-05	-4.89409e-05	1.4174e-05	0	-5.71099e-05	5.71099e-05
177	1.80577e-05	-9.22217e-06	4.53376e-05	-2.51094e-05	-5.85291e-05	8.31029e-06	-1.75388e-06	-5.68618e-05	5.3354e-05
178	5.41732e-06	-2.27746e-05	3.36092e-05	-3.09039e-05	-6.22088e-05	4.01058e-07	1.75388e-05	-2.91989e-05	6.42765e-05
179	-7.2231e-06	-3.4731e-05	2.02848e-05	-2.70409e-05	-6.17912e-05	7.7094e-06	3.15699e-05	-2.12705e-05	8.44104e-05
180	5.41732e-06	-1.84427e-05	2.92773e-05	-4.82873e-06	-3.63232e-05	2.66658e-05	2.28005e-05	-2.96789e-05	7.52798e-05
181	-8.12598e-06	-3.41659e-05	1.79139e-05	-4.82873e-06	-3.87338e-05	2.90763e-05	3.33238e-05	-1.9357e-05	8.60046e-05
182	2.07664e-05	-5.1136e-06	4.66464e-05	-9.65746e-06	-4.09537e-05	2.16388e-05	1.75388e-05	-3.55887e-05	7.06664e-05
183	7.2231e-06	-2.00561e-05	3.45023e-05	-1.54519e-05	-4.83671e-05	1.74632e-05	1.75388e-05	-3.73393e-05	7.2417e-05
184	-3.61155e-06	-2.96144e-05	2.23913e-05	-2.12464e-05	-5.40829e-05	1.15901e-05	7.01554e-06	-4.44128e-05	5.84439e-05
185	-1.26404e-05	-4.11116e-05	1.58308e-05	-1.35204e-05	-5.05529e-05	2.3512e-05	-8.76942e-06	-5.9141e-05	4.16022e-05
186	6.32021e-06	-1.82462e-05	3.08866e-05	-1.93149e-05	-5.34636e-05	1.48337e-05	1.75388e-05	-3.8194e-05	7.32717e-05
187	2.70866e-06	-2.43009e-05	2.97182e-05	-1.93149e-05	-5.15196e-05	1.28898e-05	-2.28005e-05	-8.16487e-05	3.60477e-05
188	-1.80577e-05	-4.67913e-05	1.06758e-05	-2.80066e-05	-6.18501e-05	5.83683e-06	3.85854e-05	-1.64633e-05	9.36341e-05
189	-9.02887e-06	-3.71997e-05	1.9142e-05	-3.28354e-05	-6.49964e-05	-6.7433e-07	3.15699e-05	-2.53613e-05	8.85012e-05
190	-3.61155e-06	-3.10216e-05	2.37985e-05	-3.09039e-05	-6.40975e-05	2.28977e-06	2.63083e-05	-2.06266e-05	7.32432e-05
191	-1.17375e-05	-3.85757e-05	1.51007e-05	-3.38011e-05	-6.82516e-05	6.49337e-07	5.61243e-05	2.40177e-06	0.000109847
192	-6.32021e-06	-3.2251e-05	1.96106e-05	-2.02807e-05	-5.2748e-05	1.21867e-05	2.63083e-05	-2.93783e-05	8.19948e-05
193	2.70866e-06	-2.55476e-05	3.09649e-05	-4.34586e-05	-7.93823e-05	-7.53488e-06	5.08626e-05	-4.49609e-06	0.000106221
194	1.17375e-05	-1.54485e-05	3.89235e-05	-3.18696e-05	-6.30937e-05	-6.45562e-07	1.22772e-05	-3.89924e-05	6.35468e-05
195	3.61155e-06	-2.39125e-05	3.11356e-05	-2.12464e-05	-5.28599e-05	1.0367e-05	2.28005e-05	-3.62482e-05	8.18492e-05
196	4.51443e-06	-2.42855e-05	3.33143e-05	-1.25547e-05	-4.50067e-05	1.98973e-05	4.5601e-05	-8.55968e-06	9.97616e-05
197	-5.41732e-06	-3.38305e-05	2.29959e-05	-2.70409e-05	-6.13763e-05	7.2945e-06	-5.26165e-06	-5.74971e-05	4.69738e-05
198	2.70866e-06	-2.38331e-05	2.92504e-05	-1.35204e-05	-4.57969e-05	1.8756e-05	1.5785e-05	-3.23501e-05	6.392e-05
199	1.80577e-06	-2.57223e-05	2.93339e-05	-1.83492e-05	-5.38985e-05	1.72001e-05	3.15699e-05	-1.89847e-05	8.21245e-05
200	-2.70866e-06	-2.84112e-05	2.29939e-05	0	-3.55132e-05	3.55132e-05	7.01554e-06	-3.80442e-05	5.20753e-05

## Sheet: S1_Panel_C
time	vHeadPosCh2_Pos1_units_Mean	vHeadPosCh2_Pos1_units_95ci_low	vHeadPosCh2_Pos1_units_95ci_up	vHeadPosCh2_Pos2_units_Mean	vHeadPosCh2_Pos2_units_95ci_low	vHeadPosCh2_Pos2_units_95ci_up	vHeadPosCh2_Pos3_units_Mean	vHeadPosCh2_Pos3_units_95ci_low	vHeadPosCh2_Pos3_units_95ci_up
-100	4.33386e-05	-2.66103e-05	0.000113287	-2.99381e-05	-7.97646e-05	1.98883e-05	-3.50777e-05	-0.000135147	6.49918e-05
-99	3.34068e-05	-3.70447e-05	0.000103858	-2.22122e-05	-6.88723e-05	2.4448e-05	-4.20932e-05	-0.000137692	5.35057e-05
-98	4.06299e-05	-3.02673e-05	0.000111527	-1.64177e-05	-6.78106e-05	3.49752e-05	-2.28005e-05	-0.000121302	7.57012e-05
-97	6.32021e-06	-6.40381e-05	7.66785e-05	-1.06232e-05	-6.17737e-05	4.05273e-05	-2.10466e-05	-0.000116458	7.43646e-05
-96	-9.93176e-06	-8.19958e-05	6.21323e-05	-3.66984e-05	-8.87042e-05	1.53075e-05	-2.28005e-05	-0.00011369	6.80889e-05
-95	-2.97953e-05	-0.000100771	4.11801e-05	-3.86298e-05	-9.06017e-05	1.3342e-05	-2.80621e-05	-0.000119211	6.30869e-05
-94	-1.80577e-05	-8.82138e-05	5.20983e-05	-2.70409e-05	-7.77271e-05	2.36454e-05	-1.22772e-05	-0.000104546	7.99916e-05
-93	-1.6252e-05	-9.10833e-05	5.85793e-05	-3.28354e-05	-7.99172e-05	1.42465e-05	7.01554e-06	-8.69902e-05	0.000101021
-92	-2.97953e-05	-0.000105178	4.55879e-05	-3.95956e-05	-8.99742e-05	1.0783e-05	-5.26165e-06	-9.90837e-05	8.85604e-05
-91	-3.34068e-05	-0.000108381	4.1567e-05	-4.44243e-05	-9.40234e-05	5.17473e-06	-2.63083e-05	-0.000117416	6.47991e-05
-90	-3.52126e-05	-0.000109749	3.93234e-05	-6.37392e-05	-0.000112236	-1.52424e-05	-3.50777e-06	-9.58737e-05	8.88581e-05
-89	-3.06982e-05	-0.000103859	4.2463e-05	-6.76022e-05	-0.000117861	-1.73437e-05	0	-9.26244e-05	9.26244e-05
-88	-4.42415e-05	-0.000117736	2.92536e-05	-6.27735e-05	-0.000114135	-1.14124e-05	-2.9816e-05	-0.000116624	5.69916e-05
-87	-4.60472e-05	-0.000122237	3.01429e-05	-4.92531e-05	-0.000102876	4.37004e-06	-1.75388e-05	-0.000108804	7.37264e-05
-86	-4.15328e-05	-0.000115382	3.23169e-05	-5.98763e-05	-0.000111772	-7.98038e-06	-1.05233e-05	-0.000100138	7.90914e-05
-85	-4.15328e-05	-0.000114487	3.14209e-05	-4.92531e-05	-9.7975e-05	-5.31128e-07	-4.03393e-05	-0.000131479	5.08008e-05
-84	-4.15328e-05	-0.000115552	3.24863e-05	-3.47669e-05	-8.66671e-05	1.71334e-05	-2.9816e-05	-0.00011539	5.57576e-05
-83	-4.24357e-05	-0.000114579	2.97076e-05	-4.92531e-05	-9.81218e-05	-3.84273e-07	-2.10466e-05	-0.000105973	6.38801e-05
-82	-4.06299e-05	-0.00011223	3.09706e-05	-2.60751e-05	-7.32217e-05	2.10714e-05	-2.63083e-05	-0.000118319	6.57026e-05
-81	-3.52126e-05	-0.000111246	4.0821e-05	-5.3116e-05	-9.95531e-05	-6.67897e-06	-2.28005e-05	-0.000109838	6.42368e-05
-80	3.61155e-06	-7.34429e-05	8.0666e-05	-2.70409e-05	-7.77271e-05	2.36454e-05	-3.50777e-06	-9.11469e-05	8.41314e-05
-79	2.70866e-06	-7.41228e-05	7.95401e-05	-3.86298e-05	-8.73273e-05	1.00676e-05	-4.03393e-05	-0.000125861	4.51819e-05
-78	-1.08346e-05	-8.26999e-05	6.10307e-05	-1.64177e-05	-6.53829e-05	3.25475e-05	-3.33238e-05	-0.000118286	5.16381e-05
-77	-2.34751e-05	-9.59663e-05	4.90162e-05	-2.31779e-05	-7.36983e-05	2.73425e-05	-1.40311e-05	-0.000100264	7.22019e-05
-76	-9.02887e-06	-8.14641e-05	6.34063e-05	-5.60133e-05	-0.000103172	-8.85445e-06	-2.45544e-05	-0.000110683	6.15746e-05
-75	3.61155e-06	-6.92224e-05	7.64455e-05	-4.82873e-05	-9.3959e-05	-2.61566e-06	-2.28005e-05	-0.000103935	5.83343e-05
-74	-6.32021e-06	-7.89562e-05	6.63158e-05	-5.60133e-05	-0.000103776	-8.25051e-06	-2.10466e-05	-0.000101103	5.90095e-05
-73	-2.52808e-05	-9.78878e-05	4.73261e-05	-3.09039e-05	-7.94409e-05	1.76332e-05	-3.68316e-05	-0.000116857	4.3194e-05
-72	-4.51443e-06	-7.3346e-05	6.43171e-05	-5.89105e-05	-0.000107592	-1.02286e-05	-2.9816e-05	-0.000111865	5.22327e-05
-71	2.70866e-06	-7.08322e-05	7.62496e-05	-3.28354e-05	-8.222e-05	1.65492e-05	-1.75388e-05	-0.000100531	6.5453e-05
-70	4.51443e-06	-6.93643e-05	7.83932e-05	-3.66984e-05	-8.88418e-05	1.54451e-05	-1.75388e-05	-9.62932e-05	6.12155e-05
-69	9.93176e-06	-6.21758e-05	8.20393e-05	-3.09039e-05	-8.31386e-05	2.13309e-05	-2.63083e-05	-0.000101183	4.85665e-05
-68	-1.53491e-05	-8.82987e-05	5.76006e-05	-2.60751e-05	-7.29932e-05	2.08429e-05	-1.75388e-05	-9.95279e-05	6.44502e-05
-67	-1.89606e-05	-9.1805e-05	5.38838e-05	-1.73834e-05	-6.56403e-05	3.08734e-05	-2.63083e-05	-0.00010533	5.2713e-05
-66	-1.08346e-05	-8.2874e-05	6.12048e-05	-2.80066e-05	-7.72821e-05	2.12688e-05	-2.80621e-05	-0.000109342	5.32181e-05
-65	1.35433e-05	-5.27107e-05	7.97973e-05	-4.05613e-05	-8.78767e-05	6.75399e-06	-3.50777e-05	-0.000116528	4.63729e-05
-64	-4.51443e-06	-7.46977e-05	6.56688e-05	-3.38011e-05	-8.24019e-05	1.47996e-05	-4.38471e-05	-0.000121007	3.3313e-05
-63	-1.98635e-05	-9.01423e-05	5.04152e-05	-2.99381e-05	-7.73322e-05	1.7456e-05	-3.85854e-05	-0.000119675	4.25041e-05
-62	-2.25722e-05	-9.20028e-05	4.68585e-05	-4.53901e-05	-9.42765e-05	3.49634e-06	-4.5601e-05	-0.000118704	2.75022e-05
-61	-2.07664e-05	-8.96666e-05	4.81338e-05	-5.02188e-05	-0.000101462	1.02452e-06	-4.20932e-05	-0.000119373	3.51865e-05
-60	-2.25722e-05	-9.3916e-05	4.87717e-05	-5.60133e-05	-0.000102096	-9.93038e-06	-3.85854e-05	-0.000112669	3.54978e-05
-59	-2.43779e-05	-9.85071e-05	4.97512e-05	-6.18078e-05	-0.000111891	-1.17246e-05	-1.92927e-05	-9.36286e-05	5.50431e-05
-58	-3.61155e-05	-0.000108532	3.63008e-05	-4.82873e-05	-9.70695e-05	4.94854e-07	-8.76942e-06	-8.39827e-05	6.64438e-05
-57	-2.79895e-05	-9.64209e-05	4.04419e-05	-2.22122e-05	-6.92547e-05	2.48304e-05	-1.40311e-05	-8.47544e-05	5.66923e-05
-56	-4.51443e-06	-7.25681e-05	6.35393e-05	-1.73834e-05	-6.34368e-05	2.86699e-05	-1.75388e-05	-8.77243e-05	5.26466e-05
-55	0	-7.26207e-05	7.26207e-05	-4.63558e-05	-9.33132e-05	6.01586e-07	-3.50777e-06	-8.02177e-05	7.32021e-05
-54	1.89606e-05	-5.41841e-05	9.21054e-05	-2.51094e-05	-7.22307e-05	2.20119e-05	-3.33238e-05	-0.000106639	3.99909e-05
-53	1.26404e-05	-5.62818e-05	8.15627e-05	-2.31779e-05	-6.98651e-05	2.35092e-05	-3.85854e-05	-0.000114559	3.73879e-05
-52	3.52126e-05	-3.46385e-05	0.000105064	-2.31779e-05	-7.18931e-05	2.55373e-05	-7.01554e-06	-7.69451e-05	6.2914e-05
-51	2.97953e-05	-3.81134e-05	9.7704e-05	-3.09039e-05	-7.66281e-05	1.48204e-05	-1.40311e-05	-8.32343e-05	5.51721e-05
-50	3.06982e-05	-4.17749e-05	0.000103171	-4.34586e-05	-8.99854e-05	3.06826e-06	-4.20932e-05	-0.000108518	2.43319e-05
-49	3.79213e-05	-3.14702e-05	0.000107313	-3.86298e-05	-8.34181e-05	6.15839e-06	-4.73549e-05	-0.000114421	1.97112e-05
-48	3.61155e-05	-3.26633e-05	0.000104894	-4.82873e-05	-9.64039e-05	-1.70714e-07	-1.40311e-05	-7.6219e-05	4.81569e-05
-47	2.34751e-05	-4.7928e-05	9.48781e-05	-1.64177e-05	-6.13376e-05	2.85023e-05	-2.80621e-05	-9.30191e-05	3.68949e-05
-46	8.12598e-06	-5.92727e-05	7.55247e-05	-4.44243e-05	-9.02694e-05	1.42077e-06	-1.22772e-05	-8.24278e-05	5.78734e-05
-45	2.34751e-05	-4.23125e-05	8.92626e-05	-4.92531e-05	-9.51735e-05	-3.33259e-06	-1.05233e-05	-7.71444e-05	5.60978e-05
-44	1.17375e-05	-5.63426e-05	7.98176e-05	-3.18696e-05	-7.53687e-05	1.16295e-05	-3.50777e-06	-6.81819e-05	6.11663e-05
-43	2.43779e-05	-4.14735e-05	9.02294e-05	-5.40818e-05	-9.92793e-05	-8.88429e-06	3.50777e-06	-6.00606e-05	6.70761e-05
-42	1.71549e-05	-5.21757e-05	8.64854e-05	-4.15271e-05	-8.80968e-05	5.04262e-06	-2.45544e-05	-8.97556e-05	4.06468e-05
-41	1.71549e-05	-5.03447e-05	8.46544e-05	-4.73216e-05	-9.66743e-05	2.03113e-06	0	-6.50427e-05	6.50427e-05
-40	-8.12598e-06	-7.87467e-05	6.24947e-05	-1.73834e-05	-6.47409e-05	2.99741e-05	-5.26165e-06	-6.83581e-05	5.78348e-05
-39	1.80577e-05	-5.43391e-05	9.04546e-05	-4.82873e-05	-9.18716e-05	-4.70306e-06	-1.05233e-05	-7.31205e-05	5.20739e-05
-38	-3.61155e-06	-8.21155e-05	7.48924e-05	-5.02188e-05	-9.61528e-05	-4.28475e-06	-5.26165e-06	-6.48917e-05	5.43684e-05
-37	-2.70866e-05	-0.000104522	5.03483e-05	-5.6979e-05	-0.000100017	-1.39411e-05	-1.5785e-05	-7.69e-05	4.533e-05
-36	-1.71549e-05	-9.29174e-05	5.86077e-05	-3.86298e-05	-8.39746e-05	6.71491e-06	2.45544e-05	-2.97716e-05	7.88803e-05
-35	4.51443e-06	-6.68195e-05	7.58484e-05	-4.24928e-05	-8.65501e-05	1.56441e-06	-2.10466e-05	-7.83986e-05	3.63054e-05
-34	9.02887e-07	-7.34016e-05	7.52073e-05	-2.51094e-05	-6.95704e-05	1.93516e-05	-8.76942e-06	-6.18817e-05	4.43428e-05
-33	-9.02887e-07	-7.38462e-05	7.20404e-05	-3.09039e-05	-7.63136e-05	1.45058e-05	-5.26165e-06	-6.05737e-05	5.00504e-05
-32	-2.16693e-05	-9.46469e-05	5.13083e-05	-2.51094e-05	-7.03691e-05	2.01503e-05	2.28005e-05	-3.23148e-05	7.79158e-05
-31	-2.61837e-05	-9.72796e-05	4.49122e-05	-1.25547e-05	-5.80595e-05	3.29501e-05	1.40311e-05	-3.54591e-05	6.35213e-05
-30	-1.71549e-05	-8.71149e-05	5.28052e-05	-2.80066e-05	-7.23852e-05	1.63719e-05	-2.45544e-05	-8.0804e-05	3.16952e-05
-29	9.02887e-07	-6.65996e-05	6.84054e-05	-1.25547e-05	-5.75049e-05	3.23955e-05	-7.01554e-06	-5.93549e-05	4.53239e-05
-28	1.08346e-05	-5.87727e-05	8.0442e-05	-7.72597e-06	-5.15323e-05	3.60804e-05	1.5785e-05	-4.11248e-05	7.26947e-05
-27	1.17375e-05	-5.69836e-05	8.04586e-05	-9.65746e-06	-5.15307e-05	3.22158e-05	3.50777e-06	-5.46229e-05	6.16384e-05
-26	-6.32021e-06	-7.75192e-05	6.48788e-05	-2.22122e-05	-6.74691e-05	2.30447e-05	3.50777e-06	-4.60647e-05	5.30802e-05
-25	1.17375e-05	-5.74378e-05	8.09128e-05	-1.25547e-05	-5.75846e-05	3.24752e-05	-7.01554e-06	-6.26386e-05	4.86075e-05
-24	1.53491e-05	-5.1414e-05	8.21121e-05	-2.41437e-05	-7.54624e-05	2.71751e-05	-1.40311e-05	-6.80863e-05	4.00242e-05
-23	9.02887e-07	-7.01262e-05	7.1932e-05	-4.15271e-05	-9.04237e-05	7.36953e-06	8.76942e-06	-3.91988e-05	5.67377e-05
-22	-8.12598e-06	-8.04988e-05	6.42468e-05	-2.41437e-05	-7.11631e-05	2.28758e-05	-1.40311e-05	-6.0821e-05	3.27589e-05
-21	3.1601e-05	-3.71144e-05	0.000100316	-4.82873e-06	-5.2821e-05	4.31635e-05	0	-5.16786e-05	5.16786e-05
-20	-2.70866e-06	-7.16333e-05	6.6216e-05	-1.1589e-05	-5.61854e-05	3.30075e-05	2.10466e-05	-2.22106e-05	6.43038e-05
-19	-8.12598e-06	-7.76742e-05	6.14223e-05	-2.12464e-05	-6.75708e-05	2.5078e-05	1.75388e-05	-2.81763e-05	6.3254e-05
-18	-3.34068e-05	-0.000104257	3.74436e-05	-1.25547e-05	-5.99871e-05	3.48777e-05	2.28005e-05	-2.5943e-05	7.1544e-05
-17	-2.70866e-06	-7.13602e-05	6.59428e-05	1.93149e-06	-4.3575e-05	4.7438e-05	-7.01554e-06	-5.77499e-05	4.37188e-05
-16	-1.6252e-05	-8.71286e-05	5.46246e-05	-9.65746e-07	-4.69819e-05	4.50504e-05	0	-4.42905e-05	4.42905e-05
-15	-4.51443e-06	-7.20137e-05	6.29848e-05	-2.89724e-05	-7.58873e-05	1.79425e-05	-2.9816e-05	-7.45946e-05	1.49625e-05
-14	-7.2231e-06	-7.61176e-05	6.16714e-05	-2.02807e-05	-6.71919e-05	2.66306e-05	8.76942e-06	-3.50804e-05	5.26192e-05
-13	9.02887e-07	-7.10026e-05	7.28084e-05	-1.73834e-05	-6.37469e-05	2.89801e-05	-2.9816e-05	-7.1307e-05	1.1675e-05
-12	-9.02887e-06	-7.40842e-05	5.60264e-05	-4.82873e-06	-5.28956e-05	4.32381e-05	1.5785e-05	-2.74346e-05	5.90045e-05
-11	1.80577e-06	-6.38382e-05	6.74498e-05	-4.82873e-06	-5.2821e-05	4.31635e-05	4.20932e-05	3.29548e-06	8.08909e-05
-10	7.2231e-06	-5.68185e-05	7.12647e-05	-3.38011e-05	-7.92001e-05	1.15979e-05	2.28005e-05	-1.9169e-05	6.477e-05
-9	-4.51443e-06	-7.03222e-05	6.12934e-05	-3.38011e-05	-7.99826e-05	1.23803e-05	7.01554e-06	-3.44951e-05	4.85262e-05
-8	-2.16693e-05	-8.38493e-05	4.05108e-05	-5.50475e-05	-0.000101198	-8.89751e-06	1.05233e-05	-3.70583e-05	5.81049e-05
-7	-1.53491e-05	-7.76976e-05	4.69994e-05	-3.18696e-05	-7.69065e-05	1.31673e-05	3.50777e-06	-3.65746e-05	4.35901e-05
-6	-1.71549e-05	-7.83775e-05	4.40678e-05	-3.47669e-05	-7.82532e-05	8.71946e-06	2.10466e-05	-2.02541e-05	6.23473e-05
-5	-3.1601e-05	-8.89377e-05	2.57357e-05	-5.11845e-05	-9.20117e-05	-1.03574e-05	3.50777e-06	-3.47648e-05	4.17803e-05
-4	-2.16693e-05	-7.62308e-05	3.28922e-05	-4.63558e-05	-8.53055e-05	-7.40616e-06	1.22772e-05	-3.07186e-05	5.5273e-05
-3	-2.70866e-06	-5.37824e-05	4.83651e-05	-3.76641e-05	-7.6149e-05	8.20797e-07	-2.10466e-05	-5.5137e-05	1.30438e-05
-2	-5.41732e-06	-4.69115e-05	3.60768e-05	-2.99381e-05	-6.35287e-05	3.65246e-06	-5.26165e-06	-4.30592e-05	3.25359e-05
-1	3.61155e-06	-2.88223e-05	3.60454e-05	-1.35204e-05	-3.93883e-05	1.23474e-05	3.50777e-06	-3.88676e-05	4.58831e-05
0	0	0	0	0	0	0	0	0	0
1	-3.61155e-06	-3.24687e-05	2.52456e-05	-2.60751e-05	-5.40477e-05	1.89737e-06	-8.76942e-06	-4.25758e-05	2.50369e-05
2	2.16693e-05	-1.76869e-05	6.10255e-05	-3.28354e-05	-6.5658e-05	-1.27005e-08	1.05233e-05	-2.73819e-05	4.84285e-05
3	2.70866e-06	-4.41438e-05	4.95611e-05	-2.60751e-05	-6.60673e-05	1.3917e-05	1.22772e-05	-3.01654e-05	5.47198e-05
4	-2.70866e-06	-5.04221e-05	4.50048e-05	-1.1589e-05	-5.08898e-05	2.77119e-05	1.05233e-05	-3.2079e-05	5.31256e-05
5	9.02887e-07	-5.40134e-05	5.58192e-05	-1.35204e-05	-5.50238e-05	2.79829e-05	-1.75388e-05	-5.86252e-05	2.35475e-05
6	1.80577e-06	-5.58095e-05	5.9421e-05	-9.65746e-06	-5.18716e-05	3.25566e-05	5.26165e-06	-4.19848e-05	5.25081e-05
7	7.2231e-06	-5.29354e-05	6.73816e-05	-1.73834e-05	-6.04621e-05	2.56953e-05	1.22772e-05	-2.9886e-05	5.44404e-05
8	1.6252e-05	-4.54095e-05	7.79134e-05	3.86298e-06	-4.15617e-05	4.92877e-05	1.40311e-05	-3.09563e-05	5.90184e-05
9	-6.32021e-06	-6.9552e-05	5.69116e-05	-1.54519e-05	-5.86316e-05	2.77277e-05	7.01554e-06	-4.23015e-05	5.63325e-05
10	-1.98635e-05	-8.38443e-05	4.41173e-05	-2.80066e-05	-7.45909e-05	1.85777e-05	1.05233e-05	-3.3712e-05	5.47586e-05
11	-2.70866e-05	-8.87631e-05	3.45898e-05	-2.80066e-05	-7.17345e-05	1.57212e-05	2.28005e-05	-2.08257e-05	6.64267e-05
12	-1.35433e-05	-7.59013e-05	4.88147e-05	-2.41437e-05	-6.91382e-05	2.08509e-05	2.10466e-05	-2.02541e-05	6.23473e-05
13	-9.93176e-06	-7.64832e-05	5.66197e-05	-4.15271e-05	-8.82504e-05	5.19624e-06	5.26165e-06	-3.58313e-05	4.63546e-05
14	7.2231e-06	-6.08023e-05	7.52485e-05	-3.76641e-05	-8.33826e-05	8.05444e-06	-3.50777e-06	-4.35901e-05	3.65746e-05
15	-3.61155e-06	-7.43072e-05	6.70842e-05	-3.95956e-05	-8.5975e-05	6.78382e-06	1.75388e-06	-3.60581e-05	3.95658e-05
16	-1.26404e-05	-8.03247e-05	5.50439e-05	-4.92531e-05	-9.41477e-05	-4.35836e-06	1.75388e-06	-4.34593e-05	4.69671e-05
17	-4.51443e-06	-7.00838e-05	6.1055e-05	-2.60751e-05	-6.81626e-05	1.60123e-05	-5.26165e-06	-4.74893e-05	3.6966e-05
18	-2.70866e-06	-7.11774e-05	6.57601e-05	9.65746e-07	-4.41858e-05	4.61173e-05	-7.01554e-06	-5.23368e-05	3.83057e-05
19	2.61837e-05	-4.42038e-05	9.65713e-05	-1.93149e-05	-6.46437e-05	2.60138e-05	7.01554e-06	-3.33403e-05	4.73714e-05
20	2.43779e-05	-4.24178e-05	9.11737e-05	-1.35204e-05	-5.96053e-05	3.25644e-05	7.01554e-06	-3.50606e-05	4.90917e-05
21	1.17375e-05	-5.63426e-05	7.98176e-05	-1.93149e-05	-6.49588e-05	2.63289e-05	-3.50777e-06	-4.72552e-05	4.02397e-05
22	1.08346e-05	-5.80037e-05	7.96729e-05	-4.15271e-05	-8.8327e-05	5.27286e-06	-2.10466e-05	-6.48468e-05	2.27536e-05
23	-1.17375e-05	-8.2391e-05	5.8916e-05	-4.15271e-05	-8.50752e-05	2.02099e-06	-7.01554e-06	-5.20753e-05	3.80442e-05
24	-2.16693e-05	-9.13091e-05	4.79706e-05	-4.15271e-05	-8.90865e-05	6.03228e-06	1.22772e-05	-3.66333e-05	6.11876e-05
25	-2.79895e-05	-9.80043e-05	4.20253e-05	-4.34586e-05	-9.09005e-05	3.98335e-06	8.76942e-06	-4.11308e-05	5.86696e-05
26	-3.34068e-05	-0.000100301	3.34877e-05	-3.18696e-05	-7.71446e-05	1.34053e-05	-1.22772e-05	-5.68916e-05	3.23372e-05
27	-3.79213e-05	-0.00010812	3.22778e-05	-3.18696e-05	-7.96098e-05	1.58706e-05	2.45544e-05	-2.07579e-05	6.98666e-05
28	-5.14646e-05	-0.000123864	2.09353e-05	-9.65746e-06	-5.49822e-05	3.56673e-05	8.76942e-06	-3.79508e-05	5.54897e-05
29	-3.61155e-06	-7.44842e-05	6.72611e-05	-2.70409e-05	-7.39074e-05	1.98256e-05	-3.50777e-06	-5.42582e-05	4.72426e-05
30	-2.52808e-05	-9.54754e-05	4.49138e-05	-1.83492e-05	-7.08301e-05	3.41318e-05	5.26165e-06	-4.46603e-05	5.51836e-05
31	2.70866e-06	-6.39524e-05	6.93698e-05	-2.89724e-06	-5.13391e-05	4.55446e-05	1.40311e-05	-2.79675e-05	5.60297e-05
32	1.44462e-05	-5.27189e-05	8.16113e-05	-2.89724e-06	-5.07437e-05	4.49493e-05	1.92927e-05	-3.14175e-05	7.00029e-05
33	2.97953e-05	-3.46105e-05	9.4201e-05	0	-4.89955e-05	4.89955e-05	-7.01554e-06	-6.02504e-05	4.62193e-05
34	1.44462e-05	-5.30445e-05	8.19369e-05	-2.31779e-05	-7.12266e-05	2.48708e-05	1.05233e-05	-3.50281e-05	5.60747e-05
35	-9.02887e-07	-6.95098e-05	6.77041e-05	-2.02807e-05	-7.03686e-05	2.98072e-05	2.28005e-05	-2.73766e-05	7.29776e-05
36	5.41732e-06	-6.11695e-05	7.20042e-05	-3.09039e-05	-7.94409e-05	1.76332e-05	2.9816e-05	-1.7777e-05	7.7409e-05
37	-2.52808e-05	-9.15276e-05	4.09659e-05	-1.93149e-06	-5.02635e-05	4.64005e-05	2.45544e-05	-2.95536e-05	7.86623e-05
38	-3.61155e-05	-0.000107179	3.49475e-05	-9.65746e-06	-5.56103e-05	3.62953e-05	-1.5785e-05	-6.65487e-05	3.49788e-05
39	-4.15328e-05	-0.000119588	3.65226e-05	-4.82873e-06	-5.37086e-05	4.40512e-05	-2.80621e-05	-7.72882e-05	2.11639e-05
40	-1.98635e-05	-9.9854e-05	6.01269e-05	0	-4.57431e-05	4.57431e-05	-1.05233e-05	-6.35101e-05	4.24635e-05
41	-4.51443e-06	-8.33954e-05	7.43665e-05	-2.31779e-05	-6.94023e-05	2.30465e-05	0	-5.25854e-05	5.25854e-05
42	-1.17375e-05	-8.85089e-05	6.50338e-05	-2.89724e-06	-5.11167e-05	4.53222e-05	1.5785e-05	-3.56724e-05	6.72423e-05
43	1.98635e-05	-5.46964e-05	9.44234e-05	-8.69172e-06	-5.82141e-05	4.08307e-05	1.22772e-05	-4.29858e-05	6.75401e-05
44	4.24357e-05	-2.8878e-05	0.000113749	-2.22122e-05	-6.97095e-05	2.52852e-05	1.40311e-05	-4.06761e-05	6.87382e-05
45	9.02887e-07	-7.44479e-05	7.62536e-05	-1.83492e-05	-6.49734e-05	2.8275e-05	2.28005e-05	-3.48303e-05	8.04313e-05
46	-8.12598e-06	-8.06716e-05	6.44197e-05	-2.89724e-06	-4.68403e-05	4.10458e-05	3.68316e-05	-1.94373e-05	9.31005e-05
47	7.2231e-06	-6.80991e-05	8.25453e-05	-1.64177e-05	-6.32128e-05	3.03774e-05	4.03393e-05	-9.58535e-06	9.0264e-05
48	5.41732e-06	-6.96585e-05	8.04931e-05	-2.12464e-05	-7.11454e-05	2.86526e-05	2.63083e-05	-2.3319e-05	7.59355e-05
49	-2.07664e-05	-9.58022e-05	5.42694e-05	-1.35204e-05	-6.22505e-05	3.52096e-05	1.5785e-05	-3.81394e-05	6.97094e-05
50	-2.16693e-05	-9.42165e-05	5.08779e-05	-2.80066e-05	-7.32645e-05	1.72513e-05	1.40311e-05	-3.91425e-05	6.72047e-05
51	-1.08346e-05	-8.01716e-05	5.85023e-05	-3.38011e-05	-7.89627e-05	1.13605e-05	3.50777e-06	-5.19172e-05	5.89327e-05
52	-4.51443e-06	-7.19208e-05	6.28919e-05	-1.35204e-05	-5.8742e-05	3.17011e-05	-3.50777e-06	-5.21174e-05	4.51018e-05
53	1.53491e-05	-5.22993e-05	8.29975e-05	-3.38011e-05	-7.64324e-05	8.8302e-06	-1.22772e-05	-6.49116e-05	4.03572e-05
54	2.43779e-05	-5.19164e-05	0.000100672	-2.99381e-05	-7.15345e-05	1.16583e-05	1.92927e-05	-3.36966e-05	7.22821e-05
55	2.79895e-05	-4.69512e-05	0.00010293	-2.41437e-05	-7.13911e-05	2.31038e-05	1.75388e-05	-3.6907e-05	7.19846e-05
56	3.43097e-05	-3.68617e-05	0.000105481	-3.66984e-05	-8.24751e-05	9.07843e-06	1.75388e-05	-3.6907e-05	7.19846e-05
57	2.16693e-05	-5.16081e-05	9.49466e-05	-1.44862e-05	-5.86989e-05	2.97265e-05	-1.05233e-05	-6.82083e-05	4.71617e-05
58	-5.41732e-06	-7.33544e-05	6.25197e-05	-4.15271e-05	-8.93868e-05	6.33268e-06	1.5785e-05	-4.04984e-05	7.20683e-05
59	-1.44462e-05	-8.2076e-05	5.31836e-05	-3.47669e-05	-8.11245e-05	1.15908e-05	2.45544e-05	-3.25294e-05	8.16381e-05
60	-9.02887e-06	-8.05942e-05	6.25364e-05	-3.38011e-05	-8.01375e-05	1.25352e-05	1.75388e-06	-5.72879e-05	6.07957e-05
61	-1.89606e-05	-9.00646e-05	5.21433e-05	-4.05613e-05	-8.65713e-05	5.44867e-06	3.50777e-06	-5.56306e-05	6.26461e-05
62	-1.26404e-05	-8.68995e-05	6.16186e-05	-4.15271e-05	-8.8327e-05	5.27286e-06	2.80621e-05	-3.07861e-05	8.69104e-05
63	-7.2231e-06	-8.14142e-05	6.69681e-05	-4.63558e-05	-9.56945e-05	2.98286e-06	1.75388e-06	-5.3354e-05	5.68618e-05
64	-6.32021e-06	-8.31061e-05	7.04656e-05	-2.70409e-05	-7.60744e-05	2.19926e-05	-7.01554e-06	-6.26386e-05	4.86075e-05
65	-9.02887e-06	-8.04628e-05	6.2405e-05	-3.28354e-05	-8.10452e-05	1.53744e-05	1.75388e-06	-5.52513e-05	5.8759e-05
66	-1.44462e-05	-8.47104e-05	5.58181e-05	-2.80066e-05	-7.47445e-05	1.87312e-05	2.9816e-05	-3.0873e-05	9.0505e-05
67	7.2231e-06	-6.64173e-05	8.08635e-05	-2.02807e-05	-6.63441e-05	2.57828e-05	3.15699e-05	-2.61856e-05	8.93255e-05
68	6.32021e-06	-6.3949e-05	7.65895e-05	0	-4.7435e-05	4.7435e-05	2.45544e-05	-3.31471e-05	8.22558e-05
69	2.43779e-05	-4.49034e-05	9.36593e-05	-2.02807e-05	-6.71155e-05	2.65542e-05	1.75388e-06	-5.58698e-05	5.93776e-05
70	3.43097e-05	-3.78233e-05	0.000106443	-3.18696e-05	-7.87006e-05	1.49613e-05	5.26165e-06	-5.21471e-05	6.26705e-05
71	6.04934e-05	-1.5508e-05	0.000136495	-2.31779e-05	-7.0171e-05	2.38152e-05	0	-6.05254e-05	6.05254e-05
72	5.05617e-05	-2.78932e-05	0.000129017	6.76022e-06	-4.19673e-05	5.54877e-05	1.75388e-06	-5.56644e-05	5.91721e-05
73	2.97953e-05	-4.99093e-05	0.0001095	-2.70409e-05	-7.73725e-05	2.32907e-05	5.26165e-06	-5.47635e-05	6.52868e-05
74	1.44462e-05	-6.58051e-05	9.46975e-05	-2.02807e-05	-6.89169e-05	2.83555e-05	1.05233e-05	-4.67505e-05	6.77971e-05
75	8.12598e-06	-7.20089e-05	8.82608e-05	-1.64177e-05	-6.29825e-05	3.01472e-05	1.75388e-06	-5.58698e-05	5.93776e-05
76	1.89606e-05	-5.98715e-05	9.77927e-05	-9.65746e-07	-4.7907e-05	4.59755e-05	1.92927e-05	-3.60954e-05	7.46809e-05
77	1.35433e-05	-6.26069e-05	8.96935e-05	-1.1589e-05	-5.87622e-05	3.55843e-05	-3.50777e-06	-6.12304e-05	5.42149e-05
78	9.02887e-06	-6.75262e-05	8.55839e-05	-1.73834e-05	-6.16922e-05	2.69253e-05	-1.92927e-05	-7.33856e-05	3.48002e-05
79	2.25722e-05	-5.5037e-05	0.000100181	-2.02807e-05	-6.81745e-05	2.76132e-05	1.75388e-06	-5.78853e-05	6.13931e-05
80	1.71549e-05	-6.15276e-05	9.58373e-05	-3.18696e-05	-7.97597e-05	1.60205e-05	3.50777e-06	-5.89352e-05	6.59507e-05
81	9.02887e-06	-7.221e-05	9.02677e-05	-1.73834e-05	-6.45134e-05	2.97465e-05	1.40311e-05	-4.46368e-05	7.2699e-05
82	2.43779e-05	-5.38619e-05	0.000102618	-2.51094e-05	-6.80119e-05	1.77931e-05	-1.22772e-05	-7.02534e-05	4.5699e-05
83	1.53491e-05	-6.17335e-05	9.24317e-05	-2.60751e-05	-7.29167e-05	2.07665e-05	-7.01554e-06	-6.1349e-05	4.73179e-05
84	1.26404e-05	-6.19972e-05	8.72781e-05	-2.02807e-05	-6.92107e-05	2.86493e-05	-1.75388e-06	-5.70758e-05	5.3568e-05
85	-2.70866e-06	-7.78503e-05	7.2433e-05	-1.25547e-05	-6.03633e-05	3.52539e-05	-1.22772e-05	-7.18617e-05	4.73073e-05
86	-2.34751e-05	-0.000101179	5.42289e-05	-9.65746e-07	-5.0289e-05	4.83575e-05	3.33238e-05	-1.98038e-05	8.64514e-05
87	-4.51443e-05	-0.000123754	3.34653e-05	-1.1589e-05	-6.19223e-05	3.87444e-05	-2.10466e-05	-7.67258e-05	3.46326e-05
88	-3.25039e-05	-0.000114183	4.91756e-05	-1.44862e-05	-6.25804e-05	3.3608e-05	-5.26165e-06	-5.79476e-05	4.74243e-05
89	-1.17375e-05	-9.66074e-05	7.31323e-05	-3.38011e-05	-8.77808e-05	2.01786e-05	1.40311e-05	-3.93643e-05	6.74264e-05
90	1.80577e-06	-8.41635e-05	8.7775e-05	-2.22122e-05	-7.29907e-05	2.85664e-05	-3.50777e-06	-5.91455e-05	5.213e-05
91	-2.70866e-05	-0.000113396	5.92226e-05	-2.89724e-05	-8.27211e-05	2.47764e-05	5.26165e-06	-4.3945e-05	5.44683e-05
92	-3.9727e-05	-0.000126792	4.73384e-05	-4.73216e-05	-0.000100315	5.67196e-06	7.01554e-06	-5.0693e-05	6.4724e-05
93	-3.43097e-05	-0.00012085	5.2231e-05	-4.24928e-05	-9.47354e-05	9.74972e-06	-1.75388e-05	-7.41135e-05	3.90358e-05
94	-2.25722e-05	-0.00010765	6.25059e-05	-5.60133e-05	-0.000110041	-1.9851e-06	2.28005e-05	-3.33766e-05	7.89776e-05
95	-1.71549e-05	-0.000101374	6.70642e-05	-3.38011e-05	-8.66404e-05	1.90381e-05	8.76942e-06	-4.69488e-05	6.44877e-05
96	-2.34751e-05	-0.000104687	5.77366e-05	-3.18696e-05	-8.75117e-05	2.37724e-05	2.9816e-05	-2.53658e-05	8.49978e-05
97	-7.2231e-06	-8.91187e-05	7.46725e-05	-1.73834e-05	-6.8594e-05	3.38271e-05	1.92927e-05	-3.81894e-05	7.67748e-05
98	-3.9727e-05	-0.000120524	4.10699e-05	-2.80066e-05	-7.85031e-05	2.24898e-05	8.76942e-06	-4.84142e-05	6.5953e-05
99	-1.98635e-05	-9.7429e-05	5.7702e-05	-4.15271e-05	-9.27148e-05	9.66067e-06	2.10466e-05	-3.42065e-05	7.62997e-05
100	-1.6252e-05	-9.38769e-05	6.1373e-05	-2.70409e-05	-7.73012e-05	2.32194e-05	1.40311e-05	-4.44351e-05	7.24972e-05
101	-1.6252e-05	-9.62218e-05	6.37179e-05	-3.09039e-05	-8.05358e-05	1.87281e-05	1.75388e-05	-4.20867e-05	7.71644e-05
102	-1.98635e-05	-9.97364e-05	6.00094e-05	-4.24928e-05	-9.37662e-05	8.78058e-06	1.92927e-05	-3.52354e-05	7.38208e-05
103	-3.88241e-05	-0.000119067	4.14189e-05	-1.54519e-05	-6.61149e-05	3.5211e-05	4.73549e-05	-1.14495e-05	0.000106159
104	-4.42415e-05	-0.000122563	3.40805e-05	-3.66984e-05	-8.43166e-05	1.09199e-05	2.80621e-05	-2.87425e-05	8.48668e-05
105	-4.96588e-05	-0.000125838	2.65209e-05	-2.80066e-05	-7.59554e-05	1.99421e-05	1.92927e-05	-4.1584e-05	8.01694e-05
106	-5.14646e-05	-0.00012708	2.41513e-05	-1.93149e-06	-4.76736e-05	4.38106e-05	2.45544e-05	-3.84344e-05	8.75431e-05
107	-4.60472e-05	-0.000123663	3.15682e-05	-1.93149e-06	-4.68835e-05	4.30205e-05	-8.76942e-06	-6.7583e-05	5.00442e-05
108	-5.32703e-05	-0.000129723	2.31822e-05	-1.1589e-05	-5.72179e-05	3.404e-05	2.45544e-05	-3.14847e-05	8.05935e-05
109	-6.13963e-05	-0.000137566	1.47738e-05	-2.02807e-05	-6.62663e-05	2.57049e-05	8.76942e-06	-4.75815e-05	6.51203e-05
110	-8.30656e-05	-0.000160728	-5.40366e-06	-3.76641e-05	-8.61958e-05	1.08676e-05	1.75388e-05	-4.1689e-05	7.67667e-05
111	-6.22992e-05	-0.000136727	1.21281e-05	-2.70409e-05	-7.77978e-05	2.3716e-05	1.40311e-05	-4.70061e-05	7.50682e-05
112	-4.87559e-05	-0.000120787	2.32748e-05	-1.54519e-05	-6.5187e-05	3.42832e-05	4.03393e-05	-1.86955e-05	9.93742e-05
113	-3.9727e-05	-0.000115235	3.57805e-05	-1.73834e-05	-6.80312e-05	3.32643e-05	3.85854e-05	-1.91866e-05	9.63575e-05
114	-2.70866e-05	-0.000102348	4.81743e-05	-4.82873e-06	-5.61404e-05	4.64829e-05	4.5601e-05	-1.09088e-05	0.000102111
115	-2.70866e-05	-0.000102097	4.79243e-05	-2.60751e-05	-7.60978e-05	2.39475e-05	2.63083e-05	-2.98011e-05	8.24176e-05
116	-5.5979e-05	-0.000129057	1.70986e-05	-1.93149e-05	-7.05087e-05	3.18788e-05	1.5785e-05	-4.39612e-05	7.55311e-05
117	-6.22992e-05	-0.000136093	1.14942e-05	-2.02807e-05	-7.03686e-05	2.98072e-05	2.28005e-05	-3.95576e-05	8.51586e-05
118	-6.68136e-05	-0.000135022	1.39511e-06	-2.02807e-05	-7.24705e-05	3.19091e-05	5.26165e-06	-5.87644e-05	6.92877e-05
119	-7.49396e-05	-0.000142887	-6.99218e-06	-1.06232e-05	-6.27452e-05	4.14988e-05	1.75388e-06	-5.98349e-05	6.33427e-05
120	-8.03569e-05	-0.000151102	-9.61198e-06	-9.65746e-06	-5.91393e-05	3.98244e-05	2.28005e-05	-3.76328e-05	8.32338e-05
121	-5.68819e-05	-0.000128493	1.47295e-05	-3.18696e-05	-8.32254e-05	1.94862e-05	7.01554e-06	-6.27448e-05	7.67759e-05
122	-4.24357e-05	-0.000114187	2.93158e-05	-4.82873e-05	-0.000100818	4.24354e-06	1.92927e-05	-4.51668e-05	8.37522e-05
123	-1.53491e-05	-8.73046e-05	5.66064e-05	-1.1589e-05	-6.33264e-05	4.01485e-05	7.01554e-06	-5.57918e-05	6.98229e-05
124	-3.61155e-05	-0.000107486	3.52554e-05	-2.12464e-05	-7.27008e-05	3.0208e-05	-3.50777e-06	-6.61397e-05	5.91242e-05
125	-5.77848e-05	-0.000130659	1.50891e-05	-2.60751e-05	-7.43482e-05	2.21979e-05	-1.75388e-06	-6.68863e-05	6.33785e-05
126	-3.1601e-05	-0.000106676	4.3474e-05	-3.66984e-05	-8.75195e-05	1.41228e-05	2.28005e-05	-4.03111e-05	8.5912e-05
127	-9.02887e-07	-7.46149e-05	7.28092e-05	-2.02807e-05	-6.83239e-05	2.77626e-05	-1.5785e-05	-7.72855e-05	4.57155e-05
128	1.26404e-05	-5.72743e-05	8.25551e-05	-8.69172e-06	-5.70427e-05	3.96592e-05	5.26165e-06	-5.72704e-05	6.77938e-05
129	0	-6.95816e-05	6.95816e-05	-2.89724e-05	-7.76857e-05	1.97409e-05	7.01554e-06	-5.44607e-05	6.84917e-05
130	-2.52808e-05	-9.61415e-05	4.55798e-05	-2.89724e-05	-7.88486e-05	2.09039e-05	-1.75388e-06	-6.29577e-05	5.945e-05
131	-1.80577e-05	-9.01946e-05	5.40791e-05	-2.22122e-05	-7.22085e-05	2.77842e-05	3.50777e-06	-5.48258e-05	6.18413e-05
132	-1.80577e-06	-7.4426e-05	7.08144e-05	-2.70409e-05	-7.82196e-05	2.41378e-05	8.76942e-06	-5.37453e-05	7.12841e-05
133	-2.61837e-05	-9.87186e-05	4.63512e-05	-2.22122e-05	-7.00103e-05	2.5586e-05	2.63083e-05	-3.40621e-05	8.66786e-05
134	-2.25722e-05	-0.000100544	5.53993e-05	-3.76641e-05	-8.61958e-05	1.08676e-05	-1.75388e-06	-6.4859e-05	6.13512e-05
135	-1.89606e-05	-9.55357e-05	5.76145e-05	-2.99381e-05	-7.79332e-05	1.8057e-05	8.76942e-06	-5.68802e-05	7.44191e-05
136	-9.93176e-06	-8.87617e-05	6.88982e-05	-3.09039e-05	-7.98086e-05	1.80009e-05	7.01554e-06	-5.81919e-05	7.2223e-05
137	-9.02887e-07	-7.41461e-05	7.23403e-05	-2.99381e-05	-8.03366e-05	2.04603e-05	3.85854e-05	-2.57665e-05	0.000102937
138	2.70866e-06	-7.0619e-05	7.60363e-05	-2.70409e-05	-7.82895e-05	2.42077e-05	1.92927e-05	-4.5896e-05	8.44814e-05
139	-1.35433e-05	-8.67154e-05	5.96288e-05	-2.22122e-05	-7.0975e-05	2.65507e-05	3.15699e-05	-3.09035e-05	9.40433e-05
140	-1.17375e-05	-8.34032e-05	5.99282e-05	-4.82873e-05	-9.15415e-05	-5.03313e-06	1.75388e-05	-5.00739e-05	8.51516e-05
141	-7.2231e-06	-7.853e-05	6.40838e-05	-3.28354e-05	-7.68493e-05	1.11786e-05	2.80621e-05	-3.83343e-05	9.44586e-05
142	-2.70866e-05	-9.9506e-05	4.53327e-05	-5.02188e-05	-9.68496e-05	-3.58802e-06	1.92927e-05	-4.09988e-05	7.95843e-05
143	9.02887e-07	-7.03463e-05	7.21521e-05	-3.38011e-05	-8.14339e-05	1.38316e-05	0	-6.48607e-05	6.48607e-05
144	6.32021e-06	-6.20974e-05	7.47378e-05	-3.66984e-05	-8.73076e-05	1.39109e-05	1.05233e-05	-4.9766e-05	7.08126e-05
145	-2.43779e-05	-9.35235e-05	4.47676e-05	-2.89724e-05	-8.01254e-05	2.21806e-05	-3.50777e-06	-6.36369e-05	5.66214e-05
146	-1.35433e-05	-8.02214e-05	5.31348e-05	-1.35204e-05	-6.24706e-05	3.54297e-05	1.05233e-05	-5.26377e-05	7.36843e-05
147	-4.51443e-05	-0.000112559	2.22703e-05	-2.80066e-05	-7.78604e-05	2.18471e-05	2.28005e-05	-4.08703e-05	8.64713e-05
148	-2.07664e-05	-8.7543e-05	4.60102e-05	-3.09039e-05	-8.00279e-05	1.82202e-05	1.75388e-05	-3.9659e-05	7.47367e-05
149	-2.70866e-05	-9.16894e-05	3.75162e-05	-1.35204e-05	-6.34848e-05	3.64439e-05	5.26165e-06	-5.35704e-05	6.40937e-05
150	1.80577e-06	-6.13583e-05	6.49698e-05	-1.83492e-05	-6.82402e-05	3.15419e-05	3.15699e-05	-3.07141e-05	9.38539e-05
151	-1.6252e-05	-7.99617e-05	4.74578e-05	-2.41437e-05	-7.43329e-05	2.60456e-05	-5.26165e-06	-6.56792e-05	5.51559e-05
152	-3.61155e-06	-6.54207e-05	5.81976e-05	-6.76022e-06	-5.79267e-05	4.44063e-05	-1.40311e-05	-7.44846e-05	4.64225e-05
153	-2.25722e-05	-8.61643e-05	4.10199e-05	-7.72597e-06	-5.49943e-05	3.95424e-05	-3.50777e-06	-6.42236e-05	5.72081e-05
154	-4.06299e-05	-0.000106821	2.55614e-05	7.72597e-06	-4.14737e-05	5.69256e-05	0	-6.28247e-05	6.28247e-05
155	-2.52808e-05	-8.9022e-05	3.84603e-05	-1.1589e-05	-6.13496e-05	3.81717e-05	4.91087e-05	-1.62048e-05	0.000114422
156	-3.43097e-05	-0.000100511	3.1892e-05	-2.12464e-05	-7.15031e-05	2.90103e-05	2.45544e-05	-4.08278e-05	8.99366e-05
157	-1.08346e-05	-7.76881e-05	5.60188e-05	-2.12464e-05	-7.22111e-05	2.97182e-05	1.75388e-05	-4.97234e-05	8.48011e-05
158	-1.98635e-05	-8.96504e-05	4.99233e-05	-1.25547e-05	-6.12543e-05	3.61449e-05	1.75388e-06	-6.19105e-05	6.54183e-05
159	-1.08346e-05	-8.11582e-05	5.94889e-05	-2.02807e-05	-6.81745e-05	2.76132e-05	0	-6.50427e-05	6.50427e-05
160	-3.52126e-05	-0.000104433	3.4008e-05	-1.1589e-05	-6.0843e-05	3.76651e-05	3.50777e-06	-6.09833e-05	6.79989e-05
161	-3.70184e-05	-0.000104103	3.00667e-05	-2.80066e-05	-7.49739e-05	1.89607e-05	8.76942e-06	-5.43098e-05	7.18487e-05
162	-3.25039e-05	-0.000100223	3.52148e-05	-1.44862e-05	-6.44081e-05	3.54357e-05	-1.75388e-05	-8.19288e-05	4.68511e-05
163	-1.98635e-05	-8.69038e-05	4.71768e-05	-3.57326e-05	-8.70964e-05	1.56312e-05	-1.75388e-06	-7.0591e-05	6.70833e-05
164	-1.44462e-05	-8.24454e-05	5.3553e-05	-3.86298e-05	-8.80576e-05	1.07979e-05	2.9816e-05	-3.7869e-05	9.7501e-05
165	-1.44462e-05	-8.44425e-05	5.55501e-05	-1.64177e-05	-6.30594e-05	3.0224e-05	5.26165e-06	-5.98624e-05	7.03857e-05
166	-4.51443e-05	-0.000115514	2.5225e-05	-8.69172e-06	-5.18758e-05	3.44924e-05	1.92927e-05	-4.89081e-05	8.74935e-05
167	-5.95905e-05	-0.000135133	1.59518e-05	-2.89724e-05	-7.12262e-05	1.32815e-05	-1.75388e-06	-6.93787e-05	6.58709e-05
168	-6.50079e-05	-0.000138429	8.41325e-06	-1.44862e-05	-5.87798e-05	2.98074e-05	1.5785e-05	-4.96263e-05	8.11962e-05
169	-8.03569e-05	-0.000157335	-3.37923e-06	-1.83492e-05	-6.40419e-05	2.73436e-05	-8.76942e-06	-7.45988e-05	5.706e-05
170	-6.59107e-05	-0.000142057	1.02353e-05	-2.41437e-05	-6.96135e-05	2.13262e-05	1.75388e-05	-4.86609e-05	8.37386e-05
171	-6.86194e-05	-0.000141107	3.86798e-06	-1.64177e-05	-5.81968e-05	2.53615e-05	-1.05233e-05	-7.66101e-05	5.55635e-05
172	-6.68136e-05	-0.00013977	6.14262e-06	-1.44862e-05	-5.87798e-05	2.98074e-05	1.22772e-05	-5.26233e-05	7.71777e-05
173	-4.24357e-05	-0.00011718	3.23086e-05	-1.25547e-05	-5.89175e-05	3.38081e-05	1.5785e-05	-5.51723e-05	8.67422e-05
174	-4.96588e-05	-0.000123881	2.45636e-05	-6.76022e-06	-4.94521e-05	3.59317e-05	3.15699e-05	-3.82294e-05	0.000101369
175	-3.52126e-05	-0.000111739	4.13136e-05	-1.83492e-05	-6.028e-05	2.35817e-05	1.92927e-05	-4.67961e-05	8.53816e-05
176	-1.44462e-05	-8.81899e-05	5.92975e-05	-2.12464e-05	-6.54332e-05	2.29403e-05	-1.75388e-06	-6.99009e-05	6.63931e-05
177	-1.26404e-05	-8.25551e-05	5.72743e-05	4.82873e-06	-3.87006e-05	4.83581e-05	2.10466e-05	-4.65219e-05	8.86151e-05
178	-9.02887e-07	-7.44022e-05	7.25964e-05	5.79448e-06	-4.20082e-05	5.35971e-05	1.22772e-05	-5.28052e-05	7.73595e-05
179	-5.41732e-06	-7.82917e-05	6.74571e-05	-6.76022e-06	-5.5781e-05	4.22605e-05	3.15699e-05	-3.7206e-05	0.000100346
180	4.51443e-06	-7.10409e-05	8.00698e-05	-3.86298e-06	-5.27083e-05	4.49824e-05	4.20932e-05	-2.59141e-05	0.000110101
181	-2.25722e-05	-9.81368e-05	5.29925e-05	-1.83492e-05	-6.41985e-05	2.75001e-05	2.45544e-05	-4.26109e-05	9.17196e-05
182	-6.32021e-06	-8.2286e-05	6.96456e-05	-2.41437e-05	-6.84158e-05	2.01285e-05	1.92927e-05	-4.89081e-05	8.74935e-05
183	-2.34751e-05	-0.000103326	5.63756e-05	-1.35204e-05	-5.9838e-05	3.27971e-05	8.76942e-06	-6.12358e-05	7.87747e-05
184	-1.98635e-05	-9.62492e-05	5.65221e-05	-2.89724e-06	-4.93763e-05	4.35818e-05	1.05233e-05	-5.9724e-05	8.07707e-05
185	-2.61837e-05	-0.000102792	5.04248e-05	-2.41437e-05	-6.97708e-05	2.14835e-05	0	-7.35681e-05	7.35681e-05
186	-8.12598e-06	-8.53148e-05	6.90628e-05	-8.69172e-06	-5.79966e-05	4.06132e-05	3.50777e-05	-4.11259e-05	0.000111281
187	-8.12598e-06	-8.82999e-05	7.2048e-05	2.51094e-05	-2.32873e-05	7.35061e-05	2.45544e-05	-4.72043e-05	9.6313e-05
188	-1.44462e-05	-9.16342e-05	6.27419e-05	1.1589e-05	-3.81717e-05	6.13496e-05	2.10466e-05	-5.19041e-05	9.39973e-05
189	1.26404e-05	-6.27902e-05	8.80711e-05	9.65746e-06	-4.20896e-05	6.14046e-05	2.9816e-05	-4.35654e-05	0.000103197
190	9.02887e-06	-6.75671e-05	8.56248e-05	1.73834e-05	-3.09476e-05	6.57145e-05	1.40311e-05	-5.81804e-05	8.62426e-05
191	0	-7.41569e-05	7.41569e-05	9.65746e-06	-3.6451e-05	5.57659e-05	1.75388e-05	-5.33169e-05	8.83946e-05
192	8.12598e-06	-6.89003e-05	8.51523e-05	-2.89724e-06	-5.44215e-05	4.8627e-05	-8.76942e-06	-8.31929e-05	6.56541e-05
193	3.61155e-06	-6.948e-05	7.67031e-05	2.89724e-06	-4.62058e-05	5.20003e-05	1.75388e-06	-7.71607e-05	8.06685e-05
194	-9.02887e-06	-8.37204e-05	6.56626e-05	-8.69172e-06	-5.85746e-05	4.11911e-05	1.75388e-05	-5.8311e-05	9.33887e-05
195	5.41732e-06	-6.60687e-05	7.69033e-05	-6.76022e-06	-5.73634e-05	4.3843e-05	1.92927e-05	-5.56763e-05	9.42618e-05
196	-6.32021e-06	-7.91715e-05	6.65311e-05	-1.35204e-05	-6.37708e-05	3.673e-05	7.01554e-06	-6.57301e-05	7.97611e-05
197	-1.17375e-05	-8.40124e-05	6.05374e-05	-8.69172e-06	-6.06847e-05	4.33013e-05	1.05233e-05	-7.09406e-05	9.19872e-05
198	-1.35433e-05	-8.40563e-05	5.69697e-05	1.93149e-05	-3.47384e-05	7.33683e-05	2.45544e-05	-5.66306e-05	0.000105739
199	-1.26404e-05	-8.45861e-05	5.93053e-05	1.54519e-05	-3.43552e-05	6.5259e-05	2.9816e-05	-5.00431e-05	0.000109675
200	9.02887e-07	-7.45725e-05	7.63782e-05	-1.93149e-05	-6.8291e-05	2.96612e-05	5.26165e-05	-2.4837e-05	0.00013007

## Sheet: S2_Panel_A
time	hEyePosRight_Mean	hEyePosRight_95ci_low	hEyePosRight_95ci_up	hEyePosLeft_Mean	hEyePosLeft_95ci_low	hEyePosLeft_95ci_up	hEyePosFull_Mean	hEyePosFull_95ci_low	hEyePosFull_95ci_up	vEyePosRight_Mean	vEyePosRight_95ci_low	vEyePosRight_95ci_up	vEyePosLeft_Mean	vEyePosLeft_95ci_low	vEyePosLeft_95ci_up	vEyePosFull_Mean	vEyePosFull_95ci_low	vEyePosFull_95ci_up
-100	-0.47012	-0.687202	-0.253039	-0.71014	-0.927365	-0.492916	-0.566811	-0.75757	-0.376052	-0.175808	-0.31173	-0.0398857	-0.0874894	-0.214945	0.0399657	-0.180975	-0.312782	-0.0491676
-99	-0.496481	-0.712037	-0.280925	-0.661753	-0.880512	-0.442994	-0.578634	-0.760873	-0.396395	-0.186815	-0.321553	-0.0520781	-0.0161706	-0.141909	0.109568	-0.150928	-0.282613	-0.0192439
-98	-0.473045	-0.685084	-0.261006	-0.602694	-0.811837	-0.39355	-0.568726	-0.751352	-0.386101	-0.180151	-0.315531	-0.0447702	-0.00886097	-0.13255	0.114828	-0.147268	-0.282803	-0.0117326
-97	-0.457035	-0.672459	-0.241611	-0.500042	-0.707086	-0.292997	-0.553788	-0.741153	-0.366422	-0.144428	-0.277465	-0.0113907	-0.0321836	-0.154792	0.0904252	-0.173656	-0.306442	-0.0408712
-96	-0.42571	-0.628669	-0.222751	-0.583327	-0.784446	-0.382209	-0.534044	-0.728413	-0.339676	-0.165858	-0.297569	-0.0341477	-0.0741161	-0.20268	0.0544477	-0.177598	-0.305578	-0.0496172
-95	-0.448074	-0.639674	-0.256475	-0.506876	-0.713903	-0.29985	-0.59198	-0.770843	-0.413117	-0.166873	-0.29552	-0.0382265	-0.0311747	-0.155811	0.0934614	-0.168539	-0.295715	-0.0413633
-94	-0.470631	-0.659246	-0.282016	-0.529329	-0.743939	-0.314719	-0.539746	-0.71984	-0.359653	-0.177895	-0.306396	-0.0493931	-0.0533305	-0.175515	0.0688543	-0.170442	-0.300442	-0.0404416
-93	-0.439519	-0.637217	-0.241821	-0.554492	-0.774124	-0.334861	-0.585465	-0.775337	-0.395594	-0.17082	-0.303188	-0.038453	-0.0500721	-0.174289	0.0741444	-0.15053	-0.280669	-0.02039
-92	-0.468464	-0.672021	-0.264906	-0.508748	-0.72003	-0.297467	-0.576648	-0.781269	-0.372026	-0.157581	-0.287293	-0.027869	-0.0313799	-0.159261	0.0965016	-0.1442	-0.274981	-0.0134195
-91	-0.421292	-0.628199	-0.214384	-0.476302	-0.686524	-0.266081	-0.457288	-0.666367	-0.248209	-0.137799	-0.265159	-0.0104387	-0.0187972	-0.144746	0.107152	-0.13277	-0.26545	-9.00113e-05
-90	-0.44349	-0.658405	-0.228574	-0.482579	-0.696634	-0.268523	-0.450817	-0.630595	-0.271039	-0.158407	-0.288776	-0.0280371	-0.038637	-0.169672	0.0923975	-0.156643	-0.282918	-0.0303678
-89	-0.457995	-0.675183	-0.240806	-0.57169	-0.785101	-0.358278	-0.477508	-0.652897	-0.302119	-0.165924	-0.298526	-0.0333229	-0.0761791	-0.210453	0.0580948	-0.166801	-0.286773	-0.0468288
-88	-0.437086	-0.650025	-0.224148	-0.587427	-0.79981	-0.375045	-0.502391	-0.688945	-0.315837	-0.15388	-0.279546	-0.0282134	-0.0570211	-0.186467	0.0724251	-0.167411	-0.288487	-0.0463349
-87	-0.400148	-0.604611	-0.195686	-0.556075	-0.775702	-0.336449	-0.501467	-0.68712	-0.315815	-0.138064	-0.263777	-0.0123514	-0.0792428	-0.215248	0.0567625	-0.190526	-0.310947	-0.0701058
-86	-0.388872	-0.58971	-0.188034	-0.590726	-0.784313	-0.397138	-0.583501	-0.764539	-0.402464	-0.175438	-0.299135	-0.0517401	-0.0682286	-0.192356	0.055899	-0.184754	-0.307489	-0.0620181
-85	-0.395944	-0.585548	-0.20634	-0.615448	-0.814889	-0.416007	-0.471493	-0.648261	-0.294725	-0.18432	-0.302376	-0.0662637	-0.106562	-0.242169	0.0290456	-0.156627	-0.277556	-0.0356974
-84	-0.440434	-0.63319	-0.247678	-0.497872	-0.713841	-0.281902	-0.388505	-0.562623	-0.214387	-0.18156	-0.300483	-0.062637	-0.0613355	-0.18922	0.066549	-0.165725	-0.287354	-0.0440951
-83	-0.430672	-0.622053	-0.239291	-0.445304	-0.652161	-0.238446	-0.363726	-0.539173	-0.18828	-0.183004	-0.306279	-0.0597292	-0.0232916	-0.141704	0.0951209	-0.167475	-0.287599	-0.0473505
-82	-0.377371	-0.575601	-0.179142	-0.441308	-0.657107	-0.225508	-0.386998	-0.57881	-0.195186	-0.207516	-0.328504	-0.0865266	-0.0890095	-0.22222	0.0442006	-0.16915	-0.287777	-0.0505223
-81	-0.275212	-0.480384	-0.0700399	-0.496276	-0.69856	-0.293993	-0.348776	-0.540672	-0.156879	-0.19714	-0.318264	-0.0760172	-0.06996	-0.193371	0.0534513	-0.171831	-0.290981	-0.0526818
-80	-0.278759	-0.481725	-0.0757937	-0.580232	-0.779314	-0.38115	-0.3457	-0.529896	-0.161505	-0.202024	-0.323696	-0.0803521	-0.0129298	-0.12349	0.0976308	-0.194594	-0.312332	-0.076855
-79	-0.357049	-0.552219	-0.161879	-0.57617	-0.771101	-0.381238	-0.336805	-0.51318	-0.16043	-0.224526	-0.346222	-0.102831	-0.00229151	-0.113833	0.10925	-0.178567	-0.291498	-0.0656367
-78	-0.421335	-0.624335	-0.218336	-0.541925	-0.731413	-0.352437	-0.348971	-0.543049	-0.154892	-0.176161	-0.295265	-0.0570566	-0.0291887	-0.146442	0.0880649	-0.161068	-0.277015	-0.0451206
-77	-0.41528	-0.603853	-0.226708	-0.456554	-0.655021	-0.258087	-0.358336	-0.54794	-0.168731	-0.172473	-0.289007	-0.0559397	-0.0054507	-0.122391	0.111489	-0.147649	-0.267047	-0.0282517
-76	-0.289742	-0.491207	-0.088276	-0.39365	-0.569982	-0.217318	-0.410681	-0.577738	-0.243624	-0.168588	-0.285786	-0.0513903	0.00366547	-0.109161	0.116492	-0.123537	-0.242223	-0.00485102
-75	-0.324949	-0.522173	-0.127724	-0.423779	-0.622899	-0.224659	-0.466685	-0.642463	-0.290907	-0.165137	-0.284442	-0.0458316	0.0209647	-0.0939724	0.135902	-0.119025	-0.233424	-0.00462679
-74	-0.384573	-0.578899	-0.190247	-0.450758	-0.637906	-0.26361	-0.396982	-0.567769	-0.226194	-0.188897	-0.306874	-0.0709204	-0.0446132	-0.161997	0.0727707	-0.102819	-0.215755	0.0101164
-73	-0.338018	-0.550874	-0.125161	-0.488471	-0.655253	-0.32169	-0.333758	-0.508403	-0.159113	-0.185623	-0.305432	-0.0658142	-0.0423706	-0.154681	0.0699397	-0.110891	-0.221506	-0.000275356
-72	-0.368558	-0.559142	-0.177974	-0.519643	-0.696068	-0.343218	-0.285388	-0.458746	-0.112029	-0.164283	-0.284934	-0.0436311	-0.0194212	-0.132909	0.0940666	-0.0900648	-0.205485	0.0253553
-71	-0.388967	-0.584923	-0.193012	-0.487062	-0.659961	-0.314163	-0.368417	-0.546383	-0.190451	-0.198483	-0.321274	-0.0756917	-0.0167632	-0.126048	0.0925219	-0.111884	-0.224811	0.00104293
-70	-0.312474	-0.506916	-0.118032	-0.441602	-0.630063	-0.253142	-0.447521	-0.635878	-0.259164	-0.183335	-0.300007	-0.0666628	-0.0223202	-0.129302	0.0846616	-0.143619	-0.260146	-0.0270916
-69	-0.278501	-0.457331	-0.09967	-0.51125	-0.713341	-0.309158	-0.459951	-0.620343	-0.29956	-0.159813	-0.274325	-0.0453017	-0.0506263	-0.163162	0.0619095	-0.135055	-0.249277	-0.0208336
-68	-0.227527	-0.407717	-0.0473371	-0.465883	-0.657513	-0.274253	-0.439723	-0.590351	-0.289095	-0.117655	-0.234666	-0.000644794	-0.0455115	-0.155044	0.0640209	-0.12071	-0.230584	-0.010837
-67	-0.274862	-0.462589	-0.0871346	-0.442694	-0.632216	-0.253173	-0.37258	-0.533656	-0.211503	-0.1265	-0.237244	-0.015756	-0.0334069	-0.138414	0.0716004	-0.0912797	-0.219588	0.0370287
-66	-0.223818	-0.408531	-0.0391052	-0.503125	-0.675835	-0.330414	-0.389784	-0.565517	-0.214051	-0.135658	-0.246945	-0.0243709	-0.0426771	-0.148074	0.0627196	-0.129006	-0.238908	-0.0191041
-65	-0.2011	-0.373581	-0.0286189	-0.529921	-0.700091	-0.359751	-0.357095	-0.525972	-0.188219	-0.115764	-0.225487	-0.00604066	-0.0425604	-0.146393	0.0612723	-0.136329	-0.238746	-0.0339109
-64	-0.23205	-0.427433	-0.0366673	-0.470362	-0.639024	-0.3017	-0.334149	-0.504288	-0.164011	-0.117831	-0.224017	-0.0116459	-0.0644746	-0.1707	0.0417506	-0.118272	-0.221423	-0.0151197
-63	-0.237899	-0.413813	-0.0619852	-0.462786	-0.64738	-0.278193	-0.431484	-0.601948	-0.26102	-0.149671	-0.260214	-0.0391283	-0.0438032	-0.155802	0.0681956	-0.130169	-0.2375	-0.0228372
-62	-0.218415	-0.386213	-0.0506167	-0.461029	-0.644357	-0.277701	-0.426524	-0.616054	-0.236994	-0.139705	-0.249237	-0.0301732	-0.0292225	-0.132839	0.074394	-0.129873	-0.24028	-0.0194664
-61	-0.218734	-0.409122	-0.0283458	-0.406036	-0.581876	-0.230196	-0.291839	-0.457764	-0.125913	-0.135427	-0.246246	-0.024609	-0.0332439	-0.135534	0.0690457	-0.13206	-0.243815	-0.020305
-60	-0.312581	-0.497236	-0.127926	-0.383135	-0.578166	-0.188104	-0.226818	-0.408991	-0.0446448	-0.118563	-0.226378	-0.0107472	0.00230841	-0.121273	0.12589	-0.127412	-0.234908	-0.0199166
-59	-0.31869	-0.499736	-0.137644	-0.370719	-0.548086	-0.193353	-0.226306	-0.407162	-0.0454497	-0.116797	-0.222496	-0.0110971	0.00484851	-0.108718	0.118415	-0.117001	-0.215561	-0.0184407
-58	-0.24348	-0.415048	-0.0719121	-0.354016	-0.532104	-0.175927	-0.211996	-0.377975	-0.0460169	-0.100594	-0.204253	0.00306485	-0.00638317	-0.108252	0.0954857	-0.118138	-0.215113	-0.0211631
-57	-0.255672	-0.448339	-0.0630057	-0.381549	-0.570377	-0.192721	-0.157861	-0.32085	0.00512662	-0.103331	-0.208517	0.00185453	-0.026614	-0.124503	0.0712749	-0.104706	-0.203446	-0.0059654
-56	-0.260522	-0.438733	-0.0823112	-0.371692	-0.54567	-0.197713	-0.202178	-0.380553	-0.023804	-0.065845	-0.186703	0.055013	-0.0401281	-0.142982	0.062726	-0.0730581	-0.171892	0.0257756
-55	-0.18382	-0.350356	-0.0172836	-0.267168	-0.446331	-0.0880054	-0.291372	-0.45783	-0.124913	-0.0722364	-0.178985	0.034512	0.00626159	-0.0985862	0.111109	-0.0676131	-0.163856	0.0286294
-54	-0.177618	-0.356523	0.00128811	-0.288532	-0.451328	-0.125737	-0.316437	-0.480288	-0.152585	-0.109725	-0.21794	-0.00150999	0.000131862	-0.09993	0.100194	-0.0874631	-0.180844	0.00591811
-53	-0.227725	-0.406528	-0.0489229	-0.36644	-0.53581	-0.19707	-0.353481	-0.499345	-0.207618	-0.0906958	-0.19373	0.0123379	-0.0415605	-0.138532	0.0554114	-0.0932529	-0.187665	0.0011591
-52	-0.212087	-0.387693	-0.0364804	-0.418163	-0.591745	-0.244582	-0.301547	-0.473545	-0.129548	-0.102338	-0.205044	0.000367449	-0.0583084	-0.157362	0.040745	-0.0844201	-0.179536	0.0106957
-51	-0.183105	-0.347909	-0.018302	-0.402365	-0.578051	-0.226678	-0.269344	-0.420879	-0.117809	-0.100564	-0.205021	0.00389386	-0.0538045	-0.149206	0.0415966	-0.0853126	-0.181578	0.0109528
-50	-0.159101	-0.333057	0.0148549	-0.330106	-0.520352	-0.139861	-0.253709	-0.409407	-0.0980109	-0.113422	-0.215204	-0.0116399	-0.035569	-0.129765	0.0586272	-0.0939418	-0.187006	-0.000877949
-49	-0.171393	-0.343914	0.00112705	-0.315297	-0.521283	-0.109311	-0.263471	-0.420508	-0.106434	-0.113275	-0.210859	-0.0156905	-0.0102473	-0.105764	0.085269	-0.122162	-0.213325	-0.0309984
-48	-0.181446	-0.339803	-0.0230886	-0.298521	-0.477246	-0.119796	-0.296768	-0.44951	-0.144026	-0.116786	-0.216115	-0.0174561	-0.0296554	-0.120733	0.0614224	-0.132204	-0.228733	-0.0356748
-47	-0.123245	-0.301757	0.0552669	-0.306852	-0.481953	-0.131751	-0.339856	-0.507033	-0.172678	-0.0928837	-0.190394	0.00462697	-0.0281201	-0.115488	0.0592474	-0.139168	-0.230647	-0.0476899
-46	-0.202626	-0.374887	-0.030365	-0.292228	-0.456946	-0.127511	-0.343874	-0.511939	-0.17581	-0.0960483	-0.189813	-0.00228368	-0.0303171	-0.113859	0.0532246	-0.142117	-0.233516	-0.0507191
-45	-0.111197	-0.281246	0.0588523	-0.2887	-0.453085	-0.124315	-0.315338	-0.470342	-0.160334	-0.0790154	-0.168575	0.0105442	-0.0439039	-0.130407	0.042599	-0.133448	-0.224369	-0.0425265
-44	-0.104972	-0.292745	0.0828015	-0.250643	-0.416458	-0.0848287	-0.272764	-0.405944	-0.139584	-0.105963	-0.198428	-0.0134979	-0.0350744	-0.127553	0.0574046	-0.124859	-0.215627	-0.0340918
-43	-0.160434	-0.336361	0.0154924	-0.21911	-0.387982	-0.050238	-0.289702	-0.42852	-0.150884	-0.126516	-0.222223	-0.0308088	-0.042137	-0.132647	0.0483734	-0.124973	-0.215969	-0.0339764
-42	-0.134268	-0.319012	0.0504752	-0.248118	-0.401186	-0.0950504	-0.307939	-0.470048	-0.14583	-0.0968663	-0.191696	-0.0020368	-0.0491548	-0.137842	0.0395319	-0.112452	-0.201297	-0.0236062
-41	-0.144116	-0.331745	0.0435132	-0.245075	-0.403593	-0.0865569	-0.182631	-0.348795	-0.0164667	-0.104983	-0.195856	-0.0141108	-0.0423843	-0.128195	0.0434267	-0.0794044	-0.163141	0.00433176
-40	-0.106813	-0.289563	0.0759381	-0.205434	-0.381403	-0.0294651	-0.107511	-0.281155	0.0661342	-0.0911542	-0.185101	0.00279267	-0.0482195	-0.133989	0.0375504	-0.0706993	-0.150924	0.00952566
-39	-0.0691124	-0.245776	0.107552	-0.187937	-0.350512	-0.0253626	-0.239854	-0.404997	-0.0747115	-0.0900175	-0.183048	0.00301291	-0.0130826	-0.0993738	0.0732086	-0.0984198	-0.176898	-0.019942
-38	-0.103099	-0.25538	0.0491816	-0.167941	-0.337992	0.00211043	-0.194029	-0.346075	-0.041982	-0.115643	-0.20247	-0.0288154	0.00776981	-0.0766169	0.0921565	-0.108742	-0.189644	-0.0278395
-37	-0.137883	-0.29866	0.0228945	-0.25109	-0.414555	-0.0876245	-0.175047	-0.316041	-0.0340531	-0.09134	-0.178802	-0.00387785	-0.00113583	-0.083281	0.0810094	-0.0485646	-0.133423	0.0362938
-36	-0.0977964	-0.2839	0.0883071	-0.266331	-0.417741	-0.114921	-0.262343	-0.404354	-0.120331	-0.0807543	-0.167415	0.00590678	-0.0279785	-0.106374	0.0504176	-0.0509792	-0.133864	0.0319059
-35	-0.0882495	-0.267897	0.0913983	-0.215551	-0.383605	-0.0474973	-0.245141	-0.418355	-0.071928	-0.0850762	-0.172999	0.00284679	-0.00627618	-0.0868086	0.0742562	-0.0717601	-0.163115	0.0195945
-34	-0.0466431	-0.222747	0.129461	-0.270665	-0.438556	-0.102773	-0.186852	-0.334605	-0.0390997	-0.0679804	-0.15473	0.0187689	-0.0131617	-0.0944854	0.068162	-0.0414317	-0.12289	0.0400262
-33	-0.0212418	-0.196288	0.153805	-0.294213	-0.479119	-0.109307	-0.188063	-0.335345	-0.0407807	-0.0899209	-0.175298	-0.00454379	-0.0365491	-0.131161	0.0580633	-0.0348452	-0.115364	0.0456732
-32	-0.0184034	-0.20722	0.170413	-0.208801	-0.382288	-0.0353148	-0.211531	-0.353525	-0.0695367	-0.0953694	-0.183146	-0.00759304	-0.0559204	-0.137409	0.0255682	-0.041611	-0.120491	0.0372686
-31	0.00133125	-0.179988	0.18265	-0.108892	-0.270019	0.0522353	-0.146473	-0.303481	0.0105338	-0.0842803	-0.168133	-0.000427741	-0.0668121	-0.143206	0.0095818	-0.0680122	-0.150914	0.0148898
-30	-0.0914659	-0.290049	0.107117	-0.132988	-0.295451	0.0294754	-0.0779363	-0.230941	0.0750679	-0.114138	-0.197245	-0.0310303	-0.0601272	-0.134504	0.0142495	-0.0655846	-0.146828	0.015659
-29	-0.1034	-0.27381	0.0670092	-0.11635	-0.279621	0.0469208	-0.141391	-0.281474	-0.00130727	-0.136125	-0.215829	-0.0564207	-0.0575966	-0.136719	0.0215256	-0.0690399	-0.146208	0.00812859
-28	-0.079977	-0.230582	0.0706277	-0.151157	-0.339302	0.0369884	-0.0891842	-0.23434	0.0559716	-0.11963	-0.19974	-0.0395211	-0.033043	-0.115028	0.0489419	-0.0455237	-0.117186	0.0261386
-27	-0.0718826	-0.213924	0.0701586	-0.0588426	-0.232858	0.115173	-0.220241	-0.370812	-0.0696691	-0.116339	-0.19397	-0.038708	0.0053272	-0.0872663	0.0979207	-0.0808452	-0.167751	0.0060602
-26	-0.0781561	-0.233564	0.0772513	-0.0709915	-0.231151	0.0891681	-0.266168	-0.410106	-0.12223	-0.122739	-0.196532	-0.0489454	-0.0181386	-0.0875162	0.0512391	-0.0767558	-0.159671	0.00615935
-25	-0.0433566	-0.202876	0.116162	-0.13845	-0.288623	0.011723	-0.206926	-0.338165	-0.0756865	-0.0462646	-0.122962	0.0304329	-0.044398	-0.117271	0.028475	-0.0522686	-0.129077	0.0245398
-24	0.0619354	-0.100505	0.224375	-0.138742	-0.302253	0.0247682	-0.141253	-0.285785	0.0032802	-0.0278384	-0.102862	0.0471853	-0.0444235	-0.116077	0.0272295	-0.0572105	-0.133151	0.0187297
-23	0.0505669	-0.111256	0.212389	-0.0303342	-0.175523	0.114854	-0.0798689	-0.217279	0.0575408	-0.102737	-0.174827	-0.0306474	-0.0272169	-0.0986361	0.0442022	-0.0315542	-0.104725	0.0416169
-22	0.0184189	-0.149288	0.186126	-0.0450054	-0.191018	0.101007	-0.0485707	-0.217196	0.120054	-0.0694389	-0.142382	0.00350429	-0.0293455	-0.100579	0.0418884	-0.0506426	-0.12762	0.0263351
-21	0.0454858	-0.123952	0.214923	-0.0466786	-0.19657	0.103213	-0.10336	-0.264703	0.0579835	-0.0783832	-0.1579	0.00113335	-0.0512412	-0.132975	0.0304924	-0.0606757	-0.137722	0.0163711
-20	-0.0461956	-0.223841	0.131449	-0.0335851	-0.194021	0.126851	-0.174233	-0.311902	-0.0365641	-0.121659	-0.202069	-0.041249	-0.0861809	-0.171812	-0.000549651	-0.049789	-0.129346	0.0297684
-19	-0.0268664	-0.180566	0.126833	-0.0911624	-0.250755	0.0684301	-0.123215	-0.250906	0.00447619	-0.108908	-0.179465	-0.0383504	-0.0548478	-0.130024	0.020328	0.00566211	-0.0711225	0.0824468
-18	-0.0673563	-0.203468	0.0687558	-0.141987	-0.311871	0.0278962	-0.0788762	-0.211058	0.0533059	-0.0880411	-0.15494	-0.0211418	-0.0235202	-0.0951727	0.0481323	0.0234135	-0.0493822	0.0962092
-17	-0.0279818	-0.176062	0.120098	-0.114199	-0.260337	0.0319389	-0.12034	-0.257174	0.0164947	-0.0740958	-0.144368	-0.00382361	-0.0666964	-0.136599	0.00320643	-0.00699144	-0.0780374	0.0640545
-16	0.0702626	-0.0873827	0.227908	-0.0619645	-0.203511	0.0795822	-0.179627	-0.329468	-0.0297857	-0.0573049	-0.125017	0.0104076	-0.0356112	-0.107922	0.0366994	-0.00835585	-0.0761247	0.059413
-15	0.0432421	-0.0982291	0.184713	-0.0516992	-0.196535	0.0931362	-0.214958	-0.355461	-0.0744541	-0.108801	-0.177725	-0.039876	-0.0316808	-0.0965895	0.0332278	-0.0354403	-0.10343	0.0325494
-14	0.03103	-0.130854	0.192914	-0.0555963	-0.190307	0.0791142	-0.155148	-0.286876	-0.0234191	-0.129225	-0.198282	-0.0601684	-0.00454144	-0.0660038	0.0569209	-0.018567	-0.0859428	0.0488088
-13	0.0407186	-0.113286	0.194723	-0.0141428	-0.148702	0.120416	-0.191981	-0.356536	-0.0274255	-0.110302	-0.182661	-0.0379424	-0.00621919	-0.0666614	0.0542231	-0.00577672	-0.078892	0.0673385
-12	-0.0315569	-0.180713	0.117599	0.073025	-0.0618479	0.207898	-0.217414	-0.369394	-0.0654346	-0.109174	-0.179052	-0.0392966	-0.00882444	-0.0704708	0.052822	-0.0144973	-0.0840259	0.0550314
-11	-0.0437547	-0.213844	0.126334	0.119923	-0.0176704	0.257516	-0.185952	-0.323102	-0.048803	-0.0564428	-0.122036	0.00915042	-0.00222584	-0.0621598	0.0577081	-0.0161377	-0.0836275	0.051352
-10	-0.000214462	-0.142897	0.142468	0.0641216	-0.0823482	0.210591	-0.231109	-0.359531	-0.102687	-0.0554326	-0.12301	0.0121443	-0.0487011	-0.117224	0.019822	0.00544917	-0.0664824	0.0773807
-9	-0.0305833	-0.162477	0.10131	0.0275523	-0.107249	0.162353	-0.168479	-0.300138	-0.0368211	-0.0575267	-0.121125	0.00607138	-0.0579816	-0.118683	0.00271945	0.00279059	-0.0607984	0.0663796
-8	0.0255783	-0.110356	0.161512	-0.0508121	-0.18156	0.0799355	-0.0414577	-0.178179	0.095264	-0.0113119	-0.0771214	0.0544977	-0.0396802	-0.099267	0.0199065	0.025037	-0.0365984	0.0866725
-7	0.0380018	-0.101372	0.177375	-0.0714603	-0.208116	0.0651958	-0.0136296	-0.175819	0.14856	-0.0221671	-0.0881452	0.043811	-0.0700048	-0.131451	-0.00855892	0.0383101	-0.0283805	0.105001
-6	0.0719806	-0.0665637	0.210525	-0.0370738	-0.174167	0.100019	0.00270895	-0.137618	0.143036	-0.0071541	-0.0714725	0.0571643	-0.0688476	-0.128876	-0.00881955	0.018823	-0.0448147	0.0824606
-5	0.0975963	-0.0443263	0.239519	-0.0755283	-0.21057	0.0595135	-0.0224686	-0.15929	0.114353	-0.00150826	-0.0661541	0.0631376	-0.0415143	-0.0964386	0.0134099	0.0135433	-0.0454063	0.0724928
-4	-0.0167615	-0.151886	0.118363	-0.0473805	-0.179526	0.084765	-0.0396226	-0.166689	0.0874435	-0.047992	-0.109672	0.0136883	-0.0400847	-0.0980631	0.0178938	-0.0311944	-0.0876647	0.025276
-3	-0.0281303	-0.190067	0.133806	-0.0316135	-0.175718	0.112491	-0.0343994	-0.156562	0.0877631	-0.0541894	-0.119757	0.0113783	0.00211317	-0.056231	0.0604573	-0.0228901	-0.0783818	0.0326016
-2	0.00175883	-0.112438	0.115956	0.0761141	-0.0694014	0.22163	-0.0487276	-0.174166	0.0767109	-0.045081	-0.0952116	0.0050496	0.0154023	-0.038653	0.0694576	-0.0152809	-0.0672096	0.0366477
-1	0.0392285	-0.058906	0.137363	0.0712102	-0.0344399	0.17686	-0.043055	-0.121509	0.0353992	-0.0141538	-0.0525019	0.0241943	-0.00284267	-0.0413018	0.0356165	-0.0271697	-0.0669089	0.0125695
0	0	0	0	0	0	0	0	0	0	0	0	0	0	0	0	0	0	0
1	0.0102472	-0.0749134	0.0954078	0.0122838	-0.0972434	0.121811	-0.0155308	-0.094855	0.0637935	-0.0312446	-0.068239	0.00574982	-0.0200646	-0.0613192	0.02119	0.00122874	-0.0385826	0.0410401
2	0.0725674	-0.038071	0.183206	0.0127962	-0.122192	0.147784	-0.00492818	-0.127807	0.117951	0.00313115	-0.0448292	0.0510915	-0.0393915	-0.0902365	0.0114534	-0.0193439	-0.0674679	0.02878
3	0.049424	-0.0915607	0.190409	0.0280895	-0.108715	0.164894	-0.0196155	-0.142519	0.103288	-0.0230037	-0.0757283	0.0297209	-0.0295821	-0.0888814	0.0297172	-0.0204446	-0.0756088	0.0347195
4	0.0447676	-0.103288	0.192823	0.0845605	-0.061862	0.230983	-0.0528623	-0.192491	0.0867665	-0.0462214	-0.105561	0.0131185	-0.023399	-0.0809954	0.0341974	-0.0102888	-0.0741187	0.0535411
5	0.115941	-0.020141	0.252023	0.0828916	-0.0697248	0.235508	0.028879	-0.0904355	0.148193	-0.0101015	-0.0703841	0.0501812	-0.0179724	-0.0747695	0.0388247	-0.030659	-0.0899566	0.0286385
6	0.0339584	-0.0992285	0.167145	0.0820161	-0.0523307	0.216363	0.0214407	-0.0964588	0.13934	-0.0523907	-0.114041	0.00925989	0.00901912	-0.0509512	0.0689894	-0.0590294	-0.121236	0.00317676
7	0.0387848	-0.103549	0.181118	0.0315332	-0.10988	0.172947	0.0142583	-0.116339	0.144855	-0.0639366	-0.125342	-0.00253144	-0.00777708	-0.0708095	0.0552554	-0.038439	-0.0981693	0.0212914
8	0.0736079	-0.0646739	0.21189	0.018605	-0.115713	0.152923	0.0436907	-0.0868375	0.174219	-0.0387596	-0.101273	0.0237534	-0.00321826	-0.0673801	0.0609436	-0.00363916	-0.0671191	0.0598408
9	0.16031	-0.00893945	0.32956	0.0232595	-0.126261	0.17278	0.0415167	-0.0984068	0.18144	0.0125877	-0.0615369	0.0867124	-0.000558037	-0.0601692	0.0590531	-0.013028	-0.0786141	0.052558
10	0.0811849	-0.0549259	0.217296	0.0223458	-0.0976964	0.142388	0.07241	-0.0693422	0.214162	-0.00655985	-0.0810021	0.0678824	-0.0281593	-0.0866157	0.0302972	0.0261201	-0.0344878	0.0867281
11	-0.050485	-0.203769	0.102799	0.10264	-0.054559	0.259839	0.0855971	-0.0375233	0.208717	-0.068774	-0.155339	0.0177909	-0.00361556	-0.0692064	0.0619753	0.0280104	-0.0335412	0.0895621
12	0.00397253	-0.140963	0.148908	0.0987305	-0.0516009	0.249062	0.0138323	-0.108128	0.135793	-0.0573005	-0.134724	0.0201228	0.00743985	-0.0601249	0.0750046	0.00364217	-0.0615056	0.06879
13	-0.000580217	-0.156165	0.155005	0.138638	-0.0034326	0.280709	-0.057079	-0.199277	0.0851185	-0.0616217	-0.129466	0.00622283	-0.0103929	-0.0753833	0.0545974	-0.0104568	-0.0760017	0.0550881
14	0.0333243	-0.117794	0.184442	0.0333935	-0.131598	0.198385	-0.00171811	-0.147424	0.143988	-0.0647815	-0.137262	0.00769937	-0.0514792	-0.124784	0.021826	-0.00681298	-0.0841168	0.0704908
15	0.0949393	-0.0589265	0.248805	-0.084476	-0.254702	0.0857497	0.0120557	-0.122383	0.146495	-0.0785599	-0.147491	-0.00962882	-0.0527497	-0.120935	0.0154352	-0.00198173	-0.0717092	0.0677457
16	0.134156	-0.0329961	0.301309	-0.0299935	-0.177708	0.117721	0.0890691	-0.0781404	0.256279	-0.076774	-0.144892	-0.00865564	-0.0361196	-0.10431	0.0320705	0.0489296	-0.0195944	0.117454
17	0.127814	-0.0321312	0.287758	0.0293755	-0.126335	0.185086	0.0560835	-0.103184	0.215351	-0.0710397	-0.142283	0.000203143	-0.0233288	-0.0934728	0.0468153	0.0302373	-0.043994	0.104469
18	0.0371202	-0.100323	0.174563	0.125111	-0.0106846	0.260907	0.0673102	-0.0685315	0.203152	-0.076162	-0.151234	-0.00109026	-0.0151315	-0.0856252	0.0553621	0.0343561	-0.0411026	0.109815
19	0.126762	-0.0508514	0.304375	0.124253	-0.0172654	0.265772	-0.0896299	-0.25102	0.0717598	-0.0987896	-0.191886	-0.00569345	-0.0285933	-0.0980961	0.0409095	-0.000296382	-0.0727955	0.0722028
20	0.132365	-0.0394986	0.304228	0.100617	-0.0551341	0.256367	-0.0971368	-0.25774	0.0634667	-0.112545	-0.203452	-0.0216377	-0.0180202	-0.0924338	0.0563935	0.01693	-0.0570549	0.0909149
21	0.200024	0.0246116	0.375437	0.139753	-0.0207347	0.300241	0.0560169	-0.0871754	0.199209	-0.0446113	-0.118884	0.0296619	-0.00433412	-0.0853296	0.0766614	0.052024	-0.0213192	0.125367
22	0.093238	-0.0794868	0.265963	0.21558	0.0281952	0.402964	0.0975616	-0.046557	0.24168	-0.0471617	-0.123904	0.0295802	-0.00254815	-0.0856072	0.0805109	0.0543516	-0.0169494	0.125653
23	0.0732497	-0.0811846	0.227684	0.193684	0.0331493	0.35422	0.0896494	-0.0573488	0.236648	-0.0647159	-0.146183	0.0167513	-0.0125908	-0.0895258	0.0643443	0.0375725	-0.0316904	0.106835
24	0.0889635	-0.0673874	0.245314	0.191538	0.0375859	0.345489	0.158167	0.017826	0.298508	-0.0877022	-0.167899	-0.00750516	-0.0233494	-0.0956284	0.0489296	0.0257159	-0.0430396	0.0944715
25	0.087838	-0.0761277	0.251804	0.140744	-0.0210256	0.302514	0.134487	-0.0191479	0.288123	-0.0314859	-0.120002	0.05703	-0.0225137	-0.0958437	0.0508164	0.0117745	-0.0573443	0.0808933
26	0.0436358	-0.120934	0.208205	0.178609	0.0221594	0.335059	0.119039	-0.0208687	0.258946	-0.0315661	-0.118033	0.0549008	0.000712676	-0.0732458	0.0746711	0.0167586	-0.0565934	0.0901107
27	0.0618444	-0.114607	0.238296	0.166191	0.0115432	0.320838	0.0734939	-0.0676668	0.214655	-0.0369973	-0.11895	0.0449549	0.00088803	-0.0726426	0.0744187	0.0392176	-0.0287044	0.10714
28	0.187689	0.0290457	0.346332	0.155524	0.00332777	0.307721	0.0656669	-0.077536	0.20887	-0.0155915	-0.0940676	0.0628847	-0.00661042	-0.0833317	0.0701109	0.0327303	-0.0418931	0.107354
29	0.197912	0.0267397	0.369084	0.132637	-0.0345448	0.29982	0.160825	0.0136266	0.308024	-0.00603385	-0.101175	0.0891069	-0.0265172	-0.101928	0.0488933	0.0353493	-0.040745	0.111444
30	0.162954	-0.0226446	0.348552	0.136879	-0.0226768	0.296434	0.171525	0.0139285	0.329122	-0.00791737	-0.0901787	0.074344	-0.00113837	-0.0755035	0.0732268	0.0322614	-0.0441495	0.108672
31	0.0884346	-0.061664	0.238533	0.198303	0.0239083	0.372698	0.123605	-0.0242818	0.271492	0.0144642	-0.0644578	0.0933863	-0.0220758	-0.102228	0.0580765	-0.000153093	-0.0737121	0.0734059
32	0.148886	0.0138534	0.283918	0.21066	0.0301166	0.391204	0.0854483	-0.0749012	0.245798	0.0083421	-0.0718101	0.0884943	0.0132983	-0.0642192	0.0908158	-0.00598537	-0.0842861	0.0723153
33	0.141779	-0.00780234	0.29136	0.18078	0.0161161	0.345444	0.116285	-0.0433302	0.275901	0.0144072	-0.0753502	0.104165	-0.0171275	-0.0945032	0.0602483	0.00881906	-0.0688032	0.0864413
34	0.153041	0.00390827	0.302173	0.184712	0.0181341	0.35129	0.0816174	-0.0782494	0.241484	0.0414456	-0.0457036	0.128595	-0.0205023	-0.0994161	0.0584115	0.0161309	-0.0596679	0.0919297
35	0.117657	-0.0290328	0.264347	0.140962	-0.025372	0.307297	0.122162	-0.0222174	0.266542	0.0220436	-0.0619978	0.106085	-0.0479994	-0.126829	0.0308304	0.0157467	-0.0587373	0.0902308
36	0.175245	0.0275437	0.322945	0.134135	-0.0323385	0.300609	0.122854	-0.0155094	0.261217	0.0526531	-0.0321626	0.137469	-0.0445203	-0.123117	0.0340759	0.0365731	-0.041655	0.114801
37	0.195146	0.0261716	0.364121	0.152518	-0.00407579	0.309113	0.210349	0.0647181	0.35598	0.0596517	-0.0298271	0.14913	-0.0328297	-0.111807	0.0461472	0.0429957	-0.0323648	0.118356
38	0.195251	0.0505469	0.339956	0.249965	0.0867545	0.413176	0.261423	0.0941017	0.428745	0.0274312	-0.0577321	0.112595	-0.00199705	-0.0797806	0.0757865	0.0297252	-0.0461604	0.105611
39	0.182101	0.0433522	0.32085	0.241526	0.071238	0.411814	0.181773	0.02518	0.338367	0.00948662	-0.0739974	0.0929706	-0.00826394	-0.0872058	0.070678	0.0255632	-0.0536544	0.104781
40	0.203884	0.0492514	0.358518	0.271409	0.103349	0.439468	0.193968	0.0237951	0.364141	0.0131593	-0.0797916	0.10611	-0.00226136	-0.0813896	0.0768669	0.040504	-0.0408534	0.121861
41	0.147982	-0.0158202	0.311784	0.275231	0.109071	0.441391	0.201086	0.0432632	0.358909	-0.00791285	-0.100036	0.0842098	0.0278042	-0.0554237	0.111032	0.0491181	-0.0334888	0.131725
42	0.146114	-0.00260107	0.294829	0.300853	0.146634	0.455071	0.217848	0.0678635	0.367833	0.0203405	-0.0659922	0.106673	-0.00214276	-0.0838794	0.0795939	0.0401832	-0.043916	0.124282
43	0.209509	0.0652115	0.353806	0.269677	0.106757	0.432597	0.163848	0.00391403	0.323782	0.0409757	-0.0426989	0.12465	-0.018136	-0.0998667	0.0635947	0.0167675	-0.0677339	0.101269
44	0.228216	0.0873428	0.369089	0.263456	0.0969851	0.429928	0.169017	0.0157894	0.322244	0.0530682	-0.0314971	0.137633	0.0190328	-0.0680024	0.106068	0.0342589	-0.0523983	0.120916
45	0.170449	0.0319476	0.30895	0.332496	0.165277	0.499716	0.202221	0.0399589	0.364482	0.0630428	-0.0211245	0.14721	0.0706882	-0.0149711	0.156348	0.0385015	-0.0485407	0.125544
46	0.178961	0.0276411	0.330282	0.255036	0.073802	0.436269	0.210784	0.0508445	0.370724	0.0143265	-0.0724694	0.101123	0.0435275	-0.0423226	0.129378	0.0351815	-0.0518912	0.122254
47	0.314464	0.147093	0.481835	0.20143	0.0144972	0.388363	0.263081	0.0958977	0.430265	0.0278435	-0.0675844	0.123271	0.014253	-0.0741813	0.102687	0.0479947	-0.0410601	0.137049
48	0.22228	0.0742291	0.37033	0.260278	0.0843441	0.436212	0.222321	0.061475	0.383166	0.0107347	-0.0834315	0.104901	0.00796602	-0.0847226	0.100655	0.0308156	-0.0606295	0.122261
49	0.229296	0.0911661	0.367426	0.298721	0.140353	0.457088	0.148375	-0.0264038	0.323153	0.0109432	-0.0883869	0.110273	0.0252744	-0.0693255	0.119874	0.0160531	-0.0734339	0.10554
50	0.232604	0.069574	0.395633	0.348991	0.188342	0.509639	0.210002	0.0405683	0.379436	0.0420955	-0.0566596	0.140851	0.04697	-0.0490701	0.14301	0.0403702	-0.0461302	0.126871
51	0.219055	0.0501423	0.387967	0.276499	0.104053	0.448945	0.175241	0.019076	0.331405	0.0325515	-0.0649775	0.13008	0.0258486	-0.067719	0.119416	0.0448258	-0.0440536	0.133705
52	0.173481	0.00611093	0.340851	0.339083	0.162425	0.515742	0.192569	0.0318882	0.35325	0.00722304	-0.0920856	0.106532	0.0195071	-0.0765073	0.115521	0.0385996	-0.0537589	0.130958
53	0.217693	0.0487208	0.386666	0.328021	0.12971	0.526333	0.226878	0.0646941	0.389061	0.0701652	-0.0275545	0.167885	-0.00143111	-0.0964538	0.0935916	0.0207017	-0.0662348	0.107638
54	0.204554	0.0220131	0.387096	0.315878	0.12229	0.509466	0.233669	0.0792051	0.388134	0.0867869	-0.0141625	0.187736	-0.0193211	-0.110138	0.0714955	0.0145606	-0.0760402	0.105161
55	0.203623	0.0510732	0.356172	0.268268	0.0758134	0.460723	0.274652	0.106627	0.442676	0.0604462	-0.0379868	0.158879	-0.0268123	-0.117496	0.0638717	0.0337463	-0.0614507	0.128943
56	0.259344	0.0916618	0.427026	0.282601	0.102826	0.462377	0.238554	0.0599886	0.41712	0.0443936	-0.0543006	0.143088	0.0254297	-0.0686392	0.119499	0.0542923	-0.042159	0.150743
57	0.240564	0.0723594	0.408769	0.362268	0.188381	0.536155	0.206101	0.0456813	0.36652	0.0406135	-0.0621014	0.143328	0.0472157	-0.0489832	0.143415	0.0586735	-0.0349538	0.152301
58	0.25182	0.0808257	0.422815	0.381519	0.195361	0.567677	0.261149	0.0817917	0.440507	0.0359688	-0.0669116	0.138849	0.0237579	-0.0742394	0.121755	0.0521011	-0.0418301	0.146032
59	0.371374	0.182273	0.560474	0.352583	0.154697	0.550469	0.207177	0.039685	0.374669	0.038586	-0.0636201	0.140792	0.0430535	-0.0636181	0.149725	0.0369323	-0.0587497	0.132614
60	0.270064	0.0857363	0.454392	0.331102	0.142868	0.519336	0.291619	0.119077	0.464161	0.0113755	-0.0966941	0.119445	0.00602281	-0.093444	0.10549	0.0376316	-0.0583898	0.133653
61	0.169844	0.00960066	0.330086	0.357414	0.18265	0.532178	0.223658	0.0526714	0.394644	0.000870723	-0.102203	0.103945	-0.0202464	-0.119361	0.0788677	0.0141927	-0.083878	0.112263
62	0.236722	0.0844445	0.388999	0.360885	0.170304	0.551466	0.220506	0.0525464	0.388465	0.0297423	-0.0688851	0.12837	-0.0405141	-0.142989	0.0619612	0.0483679	-0.05167	0.148406
63	0.208763	0.0444561	0.373069	0.418188	0.233395	0.60298	0.190018	0.0216278	0.358407	0.0204925	-0.0779504	0.118936	0.00982416	-0.0934135	0.113062	0.0949243	-0.00298817	0.192837
64	0.175834	0.00916755	0.342501	0.358969	0.157861	0.560076	0.191951	0.0232297	0.360671	-0.0110211	-0.1141	0.0920578	0.0288938	-0.0724151	0.130203	0.104446	0.0066357	0.202256
65	0.146719	-0.0140196	0.307458	0.349286	0.151145	0.547427	0.195314	0.0354418	0.355185	0.032156	-0.0729786	0.137291	0.00109099	-0.100204	0.102386	0.0853762	-0.0152778	0.18603
66	0.143231	-0.0262331	0.312694	0.356807	0.17348	0.540133	0.231274	0.0692597	0.393288	0.0491591	-0.0551763	0.153495	-0.00271098	-0.101734	0.0963119	0.0902005	-0.00415497	0.184556
67	0.263801	0.0986286	0.428974	0.424452	0.242096	0.606808	0.214456	0.0366923	0.392221	0.0498773	-0.0528931	0.152648	0.009287	-0.0919466	0.110521	0.113998	0.0226806	0.205316
68	0.26918	0.104126	0.434234	0.367963	0.18305	0.552876	0.218175	0.0270551	0.409296	0.0385285	-0.0641476	0.141205	0.00353367	-0.106986	0.114053	0.120871	0.0232882	0.218454
69	0.223575	0.0510679	0.396083	0.283922	0.101162	0.466682	0.206191	0.00894464	0.403438	0.0410157	-0.0590996	0.141131	0.0149689	-0.0914323	0.12137	0.161607	0.0608405	0.262373
70	0.200384	0.0424702	0.358298	0.378274	0.201395	0.555154	0.270417	0.0970146	0.443819	0.0280434	-0.0739053	0.129992	0.0117161	-0.0921259	0.115558	0.196399	0.0969933	0.295804
71	0.209188	0.0358681	0.382508	0.390784	0.211858	0.569709	0.220533	0.0599728	0.381092	0.0071903	-0.095575	0.109956	0.0153432	-0.0883052	0.118992	0.197314	0.0987238	0.295903
72	0.238765	0.0783187	0.399212	0.403431	0.212898	0.593964	0.254799	0.0818234	0.427774	0.000782779	-0.106708	0.108273	-0.00665958	-0.114431	0.101112	0.200038	0.100271	0.299806
73	0.228238	0.059446	0.397031	0.478547	0.298884	0.65821	0.222522	0.0379493	0.407095	0.0252305	-0.0881763	0.138637	0.00586805	-0.101542	0.113278	0.215013	0.112349	0.317677
74	0.255143	0.0710628	0.439224	0.494658	0.291911	0.697405	0.157113	-0.019827	0.334053	-0.0157652	-0.147819	0.116288	-0.0048905	-0.113689	0.103908	0.213883	0.110608	0.317159
75	0.296476	0.117088	0.475865	0.403222	0.209001	0.597444	0.169031	-0.0292747	0.367337	-0.00718658	-0.126927	0.112553	-0.016016	-0.126315	0.0942832	0.20945	0.104868	0.314033
76	0.239301	0.0595338	0.419069	0.382953	0.204966	0.56094	0.207818	0.00302446	0.412612	-0.0219969	-0.135266	0.0912724	-0.0410429	-0.15093	0.0688437	0.234734	0.130822	0.338647
77	0.294934	0.100182	0.489687	0.382628	0.205791	0.559465	0.157119	-0.0541945	0.368432	0.0259203	-0.0874007	0.139241	-0.0493466	-0.160367	0.0616741	0.294086	0.177217	0.410954
78	0.307375	0.121992	0.492759	0.394643	0.212247	0.577039	0.239887	0.0281395	0.451635	0.0334022	-0.0797754	0.14658	-0.0447003	-0.158136	0.0687352	0.307656	0.192945	0.422367
79	0.216504	0.0129264	0.420081	0.391186	0.199193	0.583178	0.254783	0.0552539	0.454313	-0.0249679	-0.144884	0.0949477	-0.0553113	-0.168885	0.0582624	0.324556	0.213712	0.4354
80	0.0833458	-0.157084	0.323776	0.393881	0.206137	0.581626	0.256025	0.0766373	0.435413	-0.0363339	-0.161421	0.0887531	-0.0284359	-0.141298	0.0844263	0.318264	0.208704	0.427825
81	0.146667	-0.0634868	0.35682	0.403757	0.193185	0.614328	0.191801	0.00917645	0.374425	-0.00808736	-0.126438	0.110264	-0.0220722	-0.137823	0.093679	0.292103	0.18249	0.401716
82	0.230994	0.0424423	0.419545	0.417702	0.205625	0.629779	0.228813	0.0446829	0.412943	0.0407851	-0.075567	0.157137	-0.0526155	-0.173888	0.0686567	0.364269	0.254246	0.474293
83	0.151464	-0.037969	0.340897	0.374601	0.176178	0.573023	0.205099	0.0216059	0.388592	0.034978	-0.0800096	0.149966	-0.0371984	-0.154018	0.0796213	0.392745	0.285918	0.499572
84	0.104273	-0.0910962	0.299642	0.357041	0.158241	0.555841	0.132315	-0.0407556	0.305385	0.0527527	-0.0653366	0.170842	-0.0243668	-0.145992	0.0972588	0.400412	0.292204	0.508621
85	0.186115	-0.00857589	0.380806	0.414912	0.217224	0.612601	0.191641	0.00742477	0.375856	0.0451504	-0.0707069	0.161008	0.0083518	-0.10947	0.126173	0.425445	0.312188	0.538701
86	0.227186	0.0369689	0.417402	0.413763	0.224319	0.603207	0.137424	-0.0442923	0.319141	0.0237735	-0.0931983	0.140745	-0.0284878	-0.143937	0.0869613	0.457777	0.346523	0.569032
87	0.193315	0.0117585	0.374872	0.376796	0.188441	0.565151	0.083489	-0.0903122	0.25729	0.0331605	-0.0865194	0.152841	-0.0340113	-0.148037	0.0800142	0.523667	0.410011	0.637322
88	0.214539	0.0351167	0.393962	0.448722	0.252443	0.645	0.119742	-0.0665597	0.306043	0.059401	-0.0610049	0.179807	0.0117926	-0.101816	0.125401	0.549493	0.423608	0.675378
89	0.189391	0.0058021	0.37298	0.477614	0.282776	0.672451	0.0551432	-0.126734	0.23702	0.0549782	-0.0640838	0.17404	0.03437	-0.085404	0.154144	0.562598	0.431698	0.693498
90	0.162609	-0.0323864	0.357605	0.466499	0.274513	0.658486	0.111316	-0.0703421	0.292975	0.0449159	-0.0756423	0.165474	0.0451935	-0.0742644	0.164651	0.603239	0.487028	0.71945
91	0.13649	-0.0640363	0.337015	0.487461	0.299822	0.6751	0.13472	-0.0511506	0.320591	0.0163788	-0.10823	0.140987	0.0525045	-0.0631789	0.168188	0.617798	0.500355	0.73524
92	0.0908403	-0.139225	0.320905	0.439548	0.244816	0.634281	0.142766	-0.0394639	0.324995	0.0323002	-0.100905	0.165506	0.0608713	-0.0574842	0.179227	0.662947	0.545463	0.780432
93	0.179906	-0.0505747	0.410388	0.495077	0.299715	0.69044	0.12595	-0.059535	0.311436	0.082847	-0.0471153	0.212809	0.0822715	-0.0384436	0.202987	0.700828	0.583983	0.817672
94	0.172732	-0.0258057	0.37127	0.476377	0.277039	0.675715	0.149949	-0.046697	0.346594	0.0855266	-0.0380576	0.209111	0.0537865	-0.0638373	0.17141	0.726404	0.610097	0.842711
95	0.193544	-0.0026986	0.389786	0.453354	0.224276	0.682433	0.128111	-0.0651973	0.32142	0.0624997	-0.0610047	0.186004	0.0467266	-0.0881319	0.181585	0.794725	0.675019	0.914432
96	0.206772	0.010473	0.40307	0.403649	0.190598	0.616701	0.137645	-0.0703583	0.345648	0.0508885	-0.0757818	0.177559	0.0422481	-0.0906111	0.175107	0.853998	0.720866	0.98713
97	0.166037	-0.0290256	0.361099	0.324467	0.0988369	0.550097	-0.0429455	-0.237913	0.152022	0.0783751	-0.0484317	0.205182	0.043894	-0.0884292	0.176217	0.83541	0.714185	0.956635
98	0.185839	0.00140789	0.370271	0.43968	0.212081	0.667279	-0.025119	-0.207639	0.157402	0.0788405	-0.0441795	0.20186	0.0724959	-0.0513394	0.196331	0.834192	0.712494	0.955891
99	0.222723	0.0304683	0.414977	0.521653	0.306386	0.736919	0.0525318	-0.141254	0.246317	0.0717645	-0.0492574	0.192786	0.0843208	-0.0348828	0.203524	0.853095	0.73141	0.97478
100	0.15397	-0.0485149	0.356456	0.523856	0.311791	0.735922	0.0145356	-0.208043	0.237114	0.0697254	-0.053385	0.192836	0.0581661	-0.0594426	0.175775	0.87826	0.754834	1.00169
101	0.167561	-0.0315847	0.366706	0.428506	0.205827	0.651186	0.046418	-0.155079	0.247915	0.117183	-0.00583664	0.240203	0.0584113	-0.0565961	0.173419	0.922852	0.804007	1.0417
102	0.251803	0.0449564	0.458649	0.432175	0.191714	0.672635	0.0973587	-0.104988	0.299706	0.122981	-0.00503262	0.250995	0.0877235	-0.0327159	0.208163	0.971595	0.84682	1.09637
103	0.223108	0.00644036	0.439776	0.481625	0.260629	0.702621	0.074351	-0.11719	0.265892	0.140617	0.0122622	0.268972	0.0972052	-0.0217399	0.21615	0.963581	0.836645	1.09052
104	0.224646	0.0223192	0.426973	0.40678	0.175539	0.638022	0.122948	-0.0753862	0.321282	0.101183	-0.02665	0.229015	0.0864343	-0.0353166	0.208185	1.01009	0.884574	1.13562
105	0.264416	0.0624651	0.466368	0.463979	0.236386	0.691571	0.102192	-0.106186	0.310569	0.118656	-0.00795339	0.245265	0.119853	-0.00130131	0.241008	1.04581	0.919389	1.17222
106	0.278632	0.06302	0.494243	0.465608	0.228624	0.702591	-0.0720687	-0.269345	0.125208	0.13444	0.00279404	0.266085	0.0566773	-0.0670276	0.180382	1.07705	0.947771	1.20634
107	0.301438	0.109188	0.493688	0.461477	0.252932	0.670022	0.0360951	-0.143761	0.215951	0.112377	-0.0141096	0.238864	0.0420609	-0.0838146	0.167936	1.10641	0.979492	1.23333
108	0.246154	0.0520904	0.440218	0.473995	0.261295	0.686695	0.0558863	-0.145077	0.256849	0.0959449	-0.0326286	0.224518	0.0726839	-0.053605	0.198973	1.08709	0.957417	1.21676
109	0.256878	0.0594701	0.454286	0.468155	0.251375	0.684934	0.118181	-0.0892883	0.325649	0.117245	-0.0122935	0.246783	0.0918323	-0.0360258	0.21969	1.10038	0.970459	1.23029
110	0.24564	0.0329848	0.458295	0.471213	0.25594	0.686486	0.0659189	-0.150516	0.282353	0.0827755	-0.0460748	0.211626	0.053428	-0.0720181	0.178874	1.11611	0.985024	1.24719
111	0.263194	0.0543921	0.471996	0.453537	0.23912	0.667955	0.0395513	-0.168648	0.24775	0.0984798	-0.0287685	0.225728	0.0489316	-0.0782023	0.176065	1.15797	1.02777	1.28817
112	0.349333	0.149882	0.548784	0.529521	0.320125	0.738917	0.0697013	-0.133318	0.272721	0.14691	0.0167679	0.277051	0.09484	-0.0380956	0.227776	1.1694	1.04199	1.2968
113	0.276055	0.0746326	0.477477	0.535611	0.31819	0.753033	0.0549452	-0.134681	0.244571	0.168025	0.0367453	0.299305	0.132385	0.00188289	0.262887	1.20039	1.07401	1.32677
114	0.28608	0.0759336	0.496226	0.529242	0.293997	0.764487	0.0745187	-0.127946	0.276984	0.133228	0.001188	0.265267	0.111619	-0.019668	0.242905	1.19148	1.06228	1.32067
115	0.35314	0.144844	0.561437	0.548936	0.315887	0.781985	0.114483	-0.0949849	0.323951	0.140042	0.0107588	0.269325	0.156859	0.0272759	0.286442	1.24822	1.11664	1.3798
116	0.424397	0.219399	0.629395	0.535605	0.29792	0.77329	0.0625094	-0.140526	0.265545	0.114194	-0.0175112	0.245898	0.160003	0.026896	0.293111	1.25125	1.11628	1.38622
117	0.435631	0.233376	0.637885	0.49629	0.268784	0.723797	0.0556935	-0.13628	0.247667	0.113106	-0.017794	0.244006	0.164544	0.0284252	0.300662	1.27208	1.14133	1.40282
118	0.349106	0.143145	0.555066	0.56493	0.334079	0.795781	0.116177	-0.0814068	0.31376	0.108093	-0.0271979	0.243383	0.125254	-0.0113716	0.261879	1.28047	1.14766	1.41329
119	0.389736	0.194039	0.585433	0.706934	0.47049	0.943378	0.192427	-0.0175566	0.40241	0.113908	-0.0218641	0.24968	0.127952	-0.00414048	0.260044	1.32061	1.18801	1.45322
120	0.425013	0.231153	0.618874	0.485875	0.237169	0.73458	0.258007	0.0408191	0.475195	0.134698	0.000487461	0.268909	0.145834	0.00176468	0.289903	1.35831	1.21944	1.49719
121	0.42354	0.236818	0.610262	0.426819	0.192085	0.661553	0.25026	0.0308932	0.469626	0.139068	0.00486022	0.273276	0.117301	-0.0198691	0.254472	1.35367	1.21584	1.49151
122	0.435937	0.247063	0.62481	0.475608	0.245701	0.705516	0.0576667	-0.145685	0.261019	0.19033	0.0539113	0.326749	0.107685	-0.0300159	0.245386	1.35757	1.22053	1.49462
123	0.474213	0.273296	0.67513	0.566197	0.339811	0.792582	0.0431755	-0.161654	0.248005	0.21794	0.0804568	0.355423	0.119709	-0.0199896	0.259408	1.38436	1.24744	1.52128
124	0.36405	0.166108	0.561991	0.609658	0.385868	0.833449	0.0107205	-0.202045	0.223486	0.204872	0.0592142	0.35053	0.118602	-0.021555	0.25876	1.40055	1.26252	1.53858
125	0.332826	0.122695	0.542957	0.574712	0.334625	0.814799	0.132031	-0.0917921	0.355854	0.186054	0.0407862	0.331322	0.115212	-0.0286205	0.259044	1.47223	1.32595	1.61851
126	0.50582	0.299031	0.71261	0.435867	0.190007	0.681726	0.227165	0.0181764	0.436154	0.229663	0.0859908	0.373334	0.0907453	-0.0530158	0.234506	1.48754	1.34571	1.62938
127	0.474764	0.266091	0.683438	0.545543	0.289314	0.801772	0.163638	-0.0256309	0.352906	0.209534	0.0695474	0.349521	0.0742537	-0.066872	0.215379	1.4879	1.34863	1.62717
128	0.40871	0.203432	0.613989	0.564556	0.315083	0.814029	0.090994	-0.110124	0.292112	0.19176	0.0498847	0.333635	0.0498018	-0.0897259	0.18933	1.47352	1.33585	1.61118
129	0.385128	0.17364	0.596616	0.559286	0.319602	0.798969	0.0964792	-0.108847	0.301805	0.209687	0.0691311	0.350242	0.0596202	-0.0827056	0.201946	1.46967	1.32763	1.6117
130	0.433941	0.226123	0.641759	0.551246	0.323434	0.779057	0.0395423	-0.192015	0.2711	0.211527	0.0749913	0.348064	0.0847341	-0.0553847	0.224853	1.46037	1.31679	1.60395
131	0.423184	0.21906	0.627309	0.476517	0.224619	0.728414	0.0926005	-0.128947	0.314148	0.222938	0.0896072	0.35627	0.0566105	-0.0860009	0.199222	1.46983	1.32453	1.61513
132	0.400878	0.186448	0.615308	0.493989	0.228865	0.759112	0.0677213	-0.155037	0.290479	0.191468	0.0566199	0.326316	0.0747052	-0.0695395	0.21895	1.4715	1.32689	1.6161
133	0.488746	0.289604	0.687889	0.625632	0.370979	0.880285	0.131259	-0.093376	0.355894	0.216736	0.0816046	0.351868	0.15428	0.00860756	0.299953	1.50622	1.36064	1.6518
134	0.45445	0.266992	0.641908	0.558934	0.304205	0.813662	0.159833	-0.068486	0.388152	0.196249	0.0600658	0.332433	0.138216	-0.00922224	0.285654	1.52448	1.37883	1.67013
135	0.518284	0.320516	0.716051	0.568338	0.330894	0.805782	0.126575	-0.103771	0.356921	0.187814	0.0494114	0.326216	0.117151	-0.027692	0.261994	1.55747	1.41477	1.70016
136	0.517745	0.315393	0.720098	0.559856	0.331818	0.787894	0.183408	-0.0357076	0.402525	0.188653	0.0495781	0.327729	0.0738612	-0.0693353	0.217058	1.57197	1.42742	1.71652
137	0.477779	0.265165	0.690394	0.590102	0.358982	0.821222	0.308641	0.090164	0.527118	0.197071	0.0556736	0.338468	0.095788	-0.0479953	0.239571	1.61343	1.46349	1.76338
138	0.352429	0.147019	0.557838	0.633768	0.402853	0.864684	0.336197	0.113285	0.559108	0.169338	0.0261057	0.312569	0.0984714	-0.0493094	0.246252	1.6086	1.46232	1.75487
139	0.430247	0.214127	0.646368	0.603277	0.37601	0.830544	0.279833	0.0426349	0.517031	0.176449	0.0304243	0.322474	0.120245	-0.0299742	0.270465	1.58832	1.44215	1.7345
140	0.508449	0.301927	0.714972	0.581873	0.344933	0.818814	0.151449	-0.0646576	0.367555	0.200478	0.0558428	0.345113	0.118344	-0.033742	0.270429	1.60396	1.45386	1.75406
141	0.497515	0.291845	0.703186	0.650538	0.40768	0.893397	0.190619	-0.03929	0.420528	0.199166	0.0521805	0.346152	0.131544	-0.0231415	0.286229	1.63111	1.47527	1.78696
142	0.548281	0.35062	0.745943	0.691423	0.466143	0.916703	0.241575	0.0293471	0.453803	0.190222	0.043409	0.337035	0.150245	-2.55348e-05	0.300515	1.63794	1.48292	1.79295
143	0.526479	0.311988	0.740969	0.663142	0.434281	0.892004	0.307807	0.0923112	0.523302	0.180978	0.0329564	0.329001	0.151288	0.000953247	0.301622	1.63995	1.48426	1.79563
144	0.593982	0.37269	0.815274	0.650572	0.418834	0.88231	0.219713	-0.00322693	0.442653	0.208245	0.0614384	0.355052	0.128828	-0.0211075	0.278764	1.6121	1.45697	1.76723
145	0.580274	0.36314	0.797408	0.630133	0.394723	0.865543	0.18375	-0.0488689	0.416369	0.197353	0.0511298	0.343576	0.138792	-0.0167051	0.294289	1.60339	1.44513	1.76165
146	0.516536	0.295207	0.737864	0.729753	0.491974	0.967531	0.241581	0.0097879	0.473374	0.215199	0.0632375	0.36716	0.154239	-0.0143149	0.322792	1.61708	1.45782	1.77635
147	0.494593	0.285003	0.704184	0.660736	0.414874	0.906597	0.246297	0.0222529	0.47034	0.214096	0.062199	0.365993	0.114728	-0.0455574	0.275013	1.62847	1.47025	1.78669
148	0.471598	0.259442	0.683754	0.675787	0.438018	0.913555	0.283504	0.0605514	0.506457	0.21727	0.0744643	0.360075	0.109304	-0.0470042	0.265613	1.65661	1.4952	1.81801
149	0.504912	0.302059	0.707764	0.666238	0.421398	0.911077	0.304233	0.0714496	0.537016	0.202014	0.0557821	0.348246	0.121907	-0.0297206	0.273534	1.64774	1.48685	1.80864
150	0.521414	0.308379	0.734449	0.629816	0.384742	0.874889	0.325043	0.0937238	0.556361	0.219028	0.0680709	0.369984	0.125114	-0.0322856	0.282515	1.6538	1.49569	1.8119
151	0.480926	0.267075	0.694777	0.67171	0.42515	0.91827	0.337616	0.111972	0.56326	0.20418	0.0547673	0.353592	0.108267	-0.0474153	0.26395	1.68881	1.52593	1.85168
152	0.375733	0.165206	0.586261	0.639337	0.403638	0.875036	0.353882	0.111904	0.59586	0.178032	0.0294752	0.326588	0.116312	-0.0353082	0.267933	1.69875	1.53065	1.86685
153	0.442756	0.235972	0.64954	0.684069	0.454461	0.913677	0.396372	0.150427	0.642317	0.202644	0.0530758	0.352212	0.123481	-0.0326433	0.279606	1.68775	1.52221	1.85329
154	0.566102	0.356863	0.775342	0.696779	0.429665	0.963892	0.316653	0.0652384	0.568068	0.201984	0.0455896	0.358379	0.142929	-0.0148786	0.300736	1.67417	1.51206	1.83628
155	0.528354	0.312165	0.744543	0.640601	0.387275	0.893927	0.405872	0.145916	0.665827	0.190092	0.0330166	0.347168	0.143185	-0.00603233	0.292402	1.64611	1.48455	1.80767
156	0.479405	0.249067	0.709742	0.664837	0.433085	0.896589	0.328468	0.0737081	0.583228	0.193367	0.0375595	0.349174	0.159859	0.00999293	0.309724	1.63237	1.47154	1.7932
157	0.445955	0.227731	0.664179	0.608088	0.378228	0.837947	0.421401	0.170792	0.672009	0.199582	0.0417544	0.35741	0.140076	-0.0155899	0.295742	1.69327	1.52868	1.85787
158	0.546767	0.338801	0.754733	0.57606	0.333512	0.818608	0.402347	0.156517	0.648176	0.200351	0.0441481	0.356553	0.160637	0.00662614	0.314648	1.7114	1.54564	1.87717
159	0.63387	0.416855	0.850884	0.631452	0.384223	0.87868	0.402609	0.154852	0.650365	0.201272	0.0495225	0.353022	0.156948	0.00573725	0.308159	1.71181	1.54492	1.87871
160	0.595828	0.381446	0.810211	0.722125	0.47374	0.97051	0.300862	0.0475666	0.554158	0.200012	0.0480062	0.352018	0.161797	0.0142559	0.309337	1.69977	1.53239	1.86714
161	0.513877	0.303276	0.724478	0.667789	0.446384	0.889194	0.394058	0.136856	0.65126	0.201638	0.0494197	0.353857	0.157039	0.00933499	0.304743	1.75078	1.58695	1.91461
162	0.54242	0.331447	0.753393	0.69734	0.46521	0.92947	0.366818	0.117	0.616637	0.20543	0.0531394	0.35772	0.129214	-0.0213885	0.279816	1.74705	1.5825	1.91159
163	0.532349	0.31753	0.747167	0.683633	0.431301	0.935964	0.412494	0.166707	0.658282	0.214471	0.0622681	0.366674	0.142344	-0.0110045	0.295692	1.72242	1.55828	1.88656
164	0.527012	0.321656	0.732368	0.759942	0.502979	1.0169	0.452113	0.201763	0.702463	0.218166	0.064372	0.37196	0.150241	-0.00487304	0.305355	1.74909	1.58911	1.90906
165	0.585105	0.362759	0.807451	0.818407	0.564402	1.07241	0.322162	0.0760155	0.568308	0.233445	0.0766461	0.390245	0.142686	-0.0109495	0.296322	1.74676	1.58466	1.90886
166	0.615097	0.391144	0.839049	0.719534	0.477767	0.961302	0.381324	0.146185	0.616462	0.219292	0.0607718	0.377812	0.143101	-0.0101864	0.296389	1.71629	1.55473	1.87785
167	0.666482	0.445891	0.887073	0.771913	0.539168	1.00466	0.476367	0.246477	0.706257	0.201623	0.043855	0.359391	0.153944	-0.00194208	0.30983	1.69312	1.53104	1.85519
168	0.618276	0.397939	0.838614	0.803438	0.566726	1.04015	0.505764	0.272138	0.73939	0.200779	0.0426863	0.358871	0.143874	-0.0123987	0.300147	1.74716	1.58091	1.9134
169	0.547583	0.334484	0.760683	0.73587	0.504199	0.967541	0.461411	0.217494	0.705327	0.219274	0.0619582	0.37659	0.132365	-0.0265247	0.291254	1.74185	1.55859	1.9251
170	0.518981	0.303894	0.734067	0.750051	0.518202	0.9819	0.456931	0.213168	0.700695	0.2196	0.0620348	0.377166	0.141315	-0.0153647	0.297995	1.77891	1.60353	1.9543
171	0.57945	0.360889	0.79801	0.720872	0.475268	0.966477	0.488289	0.24528	0.731298	0.211124	0.0540504	0.368198	0.112652	-0.0498005	0.275106	1.75873	1.59001	1.92745
172	0.604051	0.395942	0.812159	0.782848	0.534771	1.03092	0.566441	0.327362	0.805521	0.227614	0.0693779	0.385851	0.142519	-0.0183885	0.303427	1.74078	1.56935	1.91222
173	0.586207	0.369767	0.802648	0.887584	0.644377	1.13079	0.663196	0.418585	0.907806	0.23894	0.0792708	0.398609	0.152918	-0.00815076	0.313987	1.77595	1.60661	1.94529
174	0.591938	0.339366	0.84451	0.829471	0.590916	1.06803	0.639908	0.379378	0.900438	0.21909	0.0564408	0.381739	0.138204	-0.0213066	0.297714	1.79237	1.62258	1.96217
175	0.630875	0.368624	0.893126	0.865744	0.616385	1.1151	0.628335	0.378535	0.878135	0.183266	0.00874024	0.357792	0.167014	0.00681649	0.327212	1.7762	1.60992	1.94249
176	0.49867	0.253879	0.74346	0.855912	0.614652	1.09717	0.562382	0.318077	0.806686	0.189426	0.0228105	0.356042	0.160377	-0.00195147	0.322705	1.78314	1.61483	1.95144
177	0.567485	0.343994	0.790976	0.840189	0.586541	1.09384	0.523729	0.284098	0.763359	0.244267	0.0759115	0.412622	0.160589	5.6791e-05	0.32112	1.77574	1.60908	1.94241
178	0.679029	0.446578	0.91148	0.874476	0.629893	1.11906	0.581232	0.330687	0.831776	0.263139	0.0974818	0.428795	0.155786	-0.00416762	0.315739	1.80798	1.63738	1.97857
179	0.619185	0.388611	0.84976	0.884786	0.629996	1.13957	0.596583	0.350757	0.84241	0.22829	0.0621584	0.394421	0.166365	0.0020649	0.330666	1.78183	1.61242	1.95124
180	0.566985	0.348476	0.785495	0.838221	0.594037	1.08241	0.585182	0.349783	0.820582	0.189723	0.0253924	0.354055	0.174063	0.00983807	0.338288	1.73961	1.56761	1.9116
181	0.604822	0.391566	0.818077	0.806925	0.565863	1.04799	0.592307	0.33866	0.845954	0.224231	0.0658684	0.382594	0.173055	0.00930292	0.336807	1.76585	1.59267	1.93903
182	0.682677	0.468121	0.897232	0.854529	0.602818	1.10624	0.641069	0.379598	0.90254	0.234146	0.0770215	0.39127	0.18939	0.0277906	0.350989	1.79223	1.61905	1.9654
183	0.700498	0.477809	0.923187	0.912349	0.663878	1.16082	0.734634	0.481176	0.988092	0.244178	0.0848563	0.403501	0.181452	0.019289	0.343614	1.80265	1.6321	1.97319
184	0.658094	0.440865	0.875324	0.775768	0.539728	1.01181	0.694241	0.451028	0.937454	0.218627	0.058917	0.378337	0.143673	-0.0227308	0.310078	1.81115	1.6382	1.9841
185	0.62355	0.40902	0.83808	0.804912	0.567248	1.04258	0.674402	0.437229	0.911575	0.228362	0.066178	0.390545	0.177986	0.0135062	0.342466	1.83806	1.66494	2.01118
186	0.600068	0.371139	0.828998	0.808778	0.550796	1.06676	0.684941	0.439838	0.930043	0.267023	0.102175	0.431871	0.184172	0.0207118	0.347633	1.80133	1.62819	1.97446
187	0.540803	0.305619	0.775987	0.808874	0.569541	1.04821	0.660287	0.40359	0.916984	0.241931	0.0709003	0.412962	0.187337	0.0288776	0.345796	1.7977	1.61882	1.97659
188	0.534897	0.300674	0.769119	0.827602	0.570559	1.08464	0.757001	0.499951	1.01405	0.223535	0.0568272	0.390244	0.179159	0.0164817	0.341836	1.81961	1.63095	2.00828
189	0.620854	0.402256	0.839452	0.885396	0.630881	1.13991	0.792809	0.547547	1.03807	0.231295	0.0677621	0.394829	0.208394	0.0380125	0.378775	1.7987	1.61855	1.97886
190	0.690132	0.466066	0.914197	0.966705	0.721073	1.21234	0.80513	0.554195	1.05606	0.271894	0.0985184	0.445269	0.203019	0.0355758	0.370462	1.81109	1.63541	1.98677
191	0.627247	0.389194	0.8653	0.914603	0.675927	1.15328	0.715173	0.467553	0.962793	0.256708	0.0846714	0.428745	0.216695	0.0489017	0.384489	1.77525	1.59926	1.95123
192	0.622938	0.403082	0.842795	0.878468	0.629308	1.12763	0.832681	0.573577	1.09179	0.219626	0.0555398	0.383712	0.222206	0.0561466	0.388265	1.79829	1.62009	1.9765
193	0.700743	0.469527	0.931959	0.889774	0.637473	1.14208	0.860909	0.598847	1.12297	0.219198	0.056844	0.381552	0.218519	0.0432759	0.393762	1.78985	1.60959	1.97011
194	0.795826	0.561168	1.03048	0.910301	0.666904	1.1537	0.867632	0.625545	1.10972	0.20705	0.039333	0.374766	0.244055	0.0747465	0.413363	1.79315	1.61363	1.97267
195	0.813069	0.568618	1.05752	0.876529	0.633682	1.11938	0.785922	0.5473	1.02454	0.232876	0.0679644	0.397788	0.256492	0.0892236	0.42376	1.77421	1.5979	1.95052
196	0.859312	0.625615	1.09301	0.892013	0.633073	1.15095	0.744348	0.498006	0.99069	0.232081	0.0706809	0.393482	0.247385	0.0821908	0.412579	1.76967	1.59873	1.94062
197	0.732947	0.50476	0.961134	0.854798	0.605483	1.10411	0.73428	0.495774	0.972786	0.150724	-0.00909311	0.310541	0.221786	0.0540488	0.389523	1.76138	1.58944	1.93332
198	0.713103	0.481261	0.944945	0.805808	0.55153	1.06009	0.704251	0.471893	0.93661	0.168583	0.00757706	0.32959	0.262008	0.0909102	0.433105	1.76467	1.58932	1.94003
199	0.69074	0.456334	0.925147	0.7852	0.519417	1.05098	0.772083	0.534213	1.00995	0.191213	0.0225358	0.359891	0.254501	0.0842611	0.424742	1.7262	1.54743	1.90496
200	0.722238	0.478174	0.966301	0.783502	0.528211	1.03879	0.755727	0.518279	0.993174	0.20469	0.0340972	0.375283	0.270972	0.104952	0.436992	1.7078	1.52867	1.88694

[truncated: 11 more sheets: S2_Panel_B, S2_Panel_C, S2_Panel_D, S3_Panel_A, S3_Panel_B, S3_Panel_C, S3_Panel_D, S4_Panel_A, S4_Panel_B, S4_Panel_C, S4_Panel_D]
