# Supplementary material for: Rapid stimulus-driven modulation of slow ocular position drifts
Source: eLife. 2020 Aug 6;9:e57595. doi: 10.7554/eLife.57595 (PMC7442486; doi:10.7554/eLife.57595)
Supplement: Figure 3—source data 1. [file elife-57595-fig3-data1.xlsx]

## Sheet: Panel_A
time	vEyeVel_055_Mean	vEyeVel_055_95ci_low	vEyeVel_055_95ci_up	vEyeVel_110_Mean	vEyeVel_110_95ci_low	vEyeVel_110_95ci_up	vEyeVel_220_Mean	vEyeVel_220_95ci_low	vEyeVel_220_95ci_up	vEyeVel_420_Mean	vEyeVel_420_95ci_low	vEyeVel_420_95ci_up	vEyeVel_680_Mean	vEyeVel_680_95ci_low	vEyeVel_680_95ci_up
-100	10.6218	7.64428	13.5993	9.08457	6.32236	11.8468	9.30499	6.2984	12.3116	11.6691	8.51858	14.8196	8.56777	5.48983	11.6457
-99	10.2886	7.31885	13.2584	9.00563	6.25673	11.7545	8.82808	5.8283	11.8279	12.3491	9.1961	15.5022	8.62012	5.5266	11.7136
-98	9.9715	7.03054	12.9125	9.0992	6.36529	11.8331	8.43295	5.43962	11.4263	12.8887	9.76122	16.0161	8.95283	5.89815	12.0075
-97	9.73288	6.83818	12.6276	9.41913	6.70486	12.1334	8.19692	5.2065	11.1873	13.1532	10.0621	16.2443	9.53795	6.56295	12.513
-96	9.55309	6.71825	12.3879	9.93825	7.2458	12.6307	8.09313	5.10442	11.0818	13.1202	10.0532	16.1873	10.1827	7.29357	13.0718
-95	9.46524	6.69238	12.2381	10.5115	7.83812	13.185	8.11294	5.13369	11.0922	12.76	9.69886	15.8211	10.7186	7.86854	13.5686
-94	9.38558	6.66055	12.1106	11.0213	8.35344	13.6891	8.13243	5.17071	11.0942	12.0229	8.95427	15.0915	11.0998	8.22527	13.9743
-93	9.34106	6.6437	12.0384	11.3672	8.69678	14.0377	8.26102	5.32443	11.1976	11.1143	8.03129	14.1974	11.2465	8.30229	14.1907
-92	9.23817	6.55118	11.9252	11.3752	8.70103	14.0493	8.37366	5.47176	11.2756	10.1371	7.04168	13.2325	11.0172	7.9995	14.035
-91	9.05607	6.36571	11.7464	11.0795	8.40986	13.7491	8.53636	5.67028	11.4024	9.22044	6.13349	12.3074	10.4682	7.41018	13.5261
-90	8.76656	6.06624	11.4669	10.4539	7.80181	13.1059	8.7284	5.89302	11.5638	8.44731	5.39797	11.4966	9.73624	6.68249	12.79
-89	8.44321	5.73469	11.1517	9.53147	6.90873	12.1542	8.98137	6.15973	11.803	7.81046	4.8267	10.7942	8.86315	5.84759	11.8787
-88	8.23576	5.52711	10.9444	8.54576	5.95167	11.1399	9.28117	6.44518	12.1172	7.40582	4.50377	10.3079	8.04544	5.08722	11.0037
-87	8.16746	5.46977	10.8652	7.57141	4.99401	10.1488	9.553	6.67892	12.4271	7.33619	4.50031	10.1721	7.38086	4.48063	10.2811
-86	8.31666	5.63295	11.0004	6.78065	4.20082	9.36048	9.82613	6.90131	12.751	7.40623	4.58939	10.2231	6.9697	4.1093	9.8301
-85	8.59757	5.93336	11.2618	6.30394	3.70545	8.90242	9.96705	6.99899	12.9351	7.65844	4.81097	10.5059	6.79499	3.95168	9.6383
-84	9.02196	6.37297	11.671	6.13899	3.51855	8.75944	9.91148	6.92343	12.8995	8.16073	5.24761	11.0739	6.92463	4.07292	9.77634
-83	9.55508	6.91078	12.1994	6.39394	3.75956	9.02832	9.63082	6.64786	12.6138	8.82808	5.86686	11.7893	7.20893	4.33254	10.0853
-82	10.0861	7.43359	12.7386	6.899	4.2621	9.53589	9.14327	6.18423	12.1023	9.58129	6.61486	12.5477	7.55475	4.6508	10.4587
-81	10.5445	7.86853	13.2204	7.57365	4.94887	10.1984	8.50507	5.56491	11.4452	10.3851	7.45738	13.3128	7.93776	5.01817	10.8573
-80	10.846	8.14758	13.5445	8.32154	5.71783	10.9253	7.71649	4.77395	10.659	11.1216	8.2554	13.9879	8.23476	5.32161	11.1479
-79	10.9131	8.2002	13.6259	8.99401	6.40437	11.5837	6.89164	3.92925	9.85403	11.8485	9.03349	14.6635	8.42687	5.53617	11.3176
-78	10.7998	8.08376	13.5158	9.56972	6.97785	12.1616	6.22795	3.24377	9.21214	12.3915	9.59069	15.1923	8.50011	5.6392	11.361
-77	10.5415	7.83917	13.2439	9.98896	7.36839	12.6095	5.78422	2.79913	8.76932	12.6791	9.86736	15.4908	8.43908	5.59782	11.2803
-76	10.1561	7.47485	12.8373	10.2291	7.56522	12.893	5.6271	2.66751	8.58668	12.6733	9.84169	15.5048	8.3892	5.55287	11.2255
-75	9.67555	7.02141	12.3297	10.3211	7.60944	13.0328	5.72544	2.80652	8.64437	12.3701	9.52126	15.2189	8.32285	5.47659	11.1691
-74	9.25564	6.62587	11.8854	10.3187	7.57421	13.0632	6.051	3.16637	8.93563	11.7671	8.9062	14.6279	8.29919	5.43161	11.1668
-73	8.88805	6.27146	11.5046	10.2861	7.53349	13.0387	6.47791	3.59859	9.35723	11.0048	8.13513	13.8745	8.3459	5.45586	11.2359
-72	8.58079	5.96091	11.2007	10.2069	7.46457	12.9492	7.05524	4.14673	9.96374	10.1218	7.23944	13.0041	8.52415	5.62098	11.4273
-71	8.39214	5.75686	11.0274	10.0857	7.36534	12.8061	7.6112	4.65981	10.5626	9.21516	6.31691	12.1134	8.67663	5.77347	11.5798
-70	8.33589	5.68285	10.9889	10.0375	7.33993	12.735	8.13061	5.14843	11.1128	8.37025	5.4561	11.2844	8.77192	5.8795	11.6643
-69	8.36112	5.70497	11.0173	9.99817	7.3209	12.6754	8.59	5.59927	11.5807	7.7778	4.85165	10.704	8.77002	5.88937	11.6507
-68	8.40765	5.76825	11.0471	9.96094	7.2987	12.6232	8.99167	6.01563	11.9677	7.52496	4.58585	10.4641	8.65375	5.76936	11.5381
-67	8.46825	5.86041	11.0761	9.95762	7.30225	12.613	9.26086	6.30989	12.2118	7.5242	4.57955	10.4689	8.42941	5.52006	11.3388
-66	8.50326	5.93785	11.0687	9.98118	7.32555	12.6368	9.44884	6.51444	12.3832	7.85011	4.90802	10.7922	8.07242	5.12223	11.0226
-65	8.49342	5.95906	11.0278	10.0328	7.37614	12.6894	9.54321	6.60432	12.4821	8.35927	5.43259	11.2859	7.6787	4.69849	10.6589
-64	8.47343	5.93819	11.0087	10.1155	7.46203	12.7689	9.5695	6.61369	12.5253	8.95898	6.04828	11.8697	7.33392	4.34911	10.3187
-63	8.42099	5.85215	10.9898	10.2576	7.60861	12.9065	9.45238	6.47917	12.4256	9.53607	6.62826	12.4439	7.16271	4.20166	10.1238
-62	8.38818	5.76544	11.0109	10.3883	7.74893	13.0276	9.13277	6.15814	12.1074	9.98751	7.04896	12.9261	7.22003	4.30441	10.1357
-61	8.26188	5.57987	10.9439	10.5172	7.88725	13.1472	8.7238	5.77328	11.6743	10.2496	7.25397	13.2452	7.57511	4.70552	10.4447
-60	8.08571	5.35755	10.8139	10.6011	7.97377	13.2283	8.22262	5.31246	11.1328	10.2522	7.1955	13.3088	8.20532	5.36991	11.0407
-59	8.01389	5.26638	10.7614	10.6453	8.01146	13.2792	7.72752	4.86172	10.5933	9.9236	6.83543	13.0118	9.02235	6.20039	11.8443
-58	7.96977	5.22193	10.7176	10.6168	7.97167	13.2618	7.41101	4.5776	10.2444	9.45632	6.38389	12.5288	9.95812	7.13031	12.7859
-57	8.00592	5.27415	10.7377	10.4921	7.84408	13.1401	7.26168	4.44216	10.0812	8.82401	5.79595	11.8521	10.8043	7.96191	13.6466
-56	8.04924	5.34313	10.7553	10.2951	7.65706	12.933	7.29783	4.47267	10.123	8.12639	5.14161	11.1112	11.4068	8.55249	14.2612
-55	8.1535	5.47322	10.8338	10.0053	7.38613	12.6245	7.5138	4.6711	10.3565	7.51339	4.53746	10.4893	11.7152	8.85573	14.5746
-54	8.32204	5.66155	10.9825	9.71157	7.11528	12.3079	7.86857	5.00633	10.7308	7.14466	4.14521	10.1441	11.6656	8.80556	14.5256
-53	8.47009	5.82015	11.12	9.3975	6.81229	11.9827	8.29652	5.41944	11.1736	6.95879	3.91917	9.99842	11.235	8.37242	14.0977
-52	8.614	5.96139	11.2666	9.14016	6.54173	11.7386	8.66713	5.78915	11.5451	7.10179	4.03999	10.1636	10.547	7.68565	13.4084
-51	8.69768	6.03358	11.3618	8.98842	6.36285	11.614	8.84294	5.97686	11.709	7.49355	4.44094	10.5462	9.68261	6.82767	12.5376
-50	8.71892	6.04628	11.3916	8.95724	6.30612	11.6084	8.84756	6.00154	11.6936	8.13778	5.11873	11.1568	8.83237	5.98363	11.6811
-49	8.68699	6.01886	11.3551	9.02689	6.36004	11.6937	8.6609	5.83352	11.4883	8.8966	5.9194	11.8738	8.10649	5.26953	10.9434
-48	8.63073	5.9788	11.2827	9.22108	6.5514	11.8908	8.28187	5.46132	11.1024	9.62203	6.67959	12.5645	7.65015	4.82532	10.475
-47	8.53803	5.91121	11.1649	9.48738	6.82478	12.15	7.88989	5.06063	10.7191	10.2848	7.35493	13.2146	7.50031	4.68944	10.3112
-46	8.40043	5.79497	11.0059	9.76359	7.10676	12.4204	7.58979	4.73769	10.4419	10.7421	7.7963	13.6879	7.71603	4.91469	10.5174
-45	8.29448	5.69727	10.8917	10.0081	7.35207	12.6642	7.40189	4.51818	10.2856	10.9334	7.95024	13.9167	8.17585	5.37935	10.9723
-44	8.22161	5.61593	10.8273	10.1847	7.51813	12.8512	7.37964	4.46949	10.2898	10.8545	7.83497	13.8741	8.72703	5.92463	11.5294
-43	8.11981	5.4891	10.7505	10.2555	7.56949	12.9414	7.66236	4.74047	10.5842	10.4661	7.43137	13.5009	9.36832	6.54888	12.1878
-42	8.0305	5.37314	10.6879	10.1748	7.47025	12.8794	8.13344	5.21426	11.0526	9.87296	6.85211	12.8938	9.94118	7.08752	12.7948
-41	8.01536	5.33389	10.6968	10.0572	7.33108	12.7833	8.76009	5.8568	11.6634	9.12365	6.14366	12.1036	10.3137	7.42172	13.2057
-40	8.08757	5.39345	10.7817	9.84252	7.09834	12.5867	9.41554	6.53589	12.2952	8.27976	5.34758	11.2119	10.4776	7.5517	13.4035
-39	8.24545	5.54783	10.9431	9.60114	6.85569	12.3466	9.98448	7.12962	12.8393	7.51006	4.61161	10.4085	10.4085	7.46253	13.3545
-38	8.48937	5.79308	11.1857	9.33524	6.60776	12.0627	10.3895	7.55035	13.2287	6.7447	3.85323	9.63617	10.1443	7.20518	13.0835
-37	8.85804	6.16301	11.5531	9.04718	6.35672	11.7376	10.6277	7.79516	13.4603	6.1116	3.20005	9.02314	9.75456	6.84748	12.6616
-36	9.34981	6.65059	12.049	8.80272	6.15609	11.4493	10.6461	7.81299	13.4793	5.69775	2.75674	8.63876	9.35263	6.48624	12.219
-35	9.89651	7.19134	12.6017	8.6028	5.98605	11.2195	10.5589	7.7198	13.3979	5.47929	2.52241	8.43617	8.91861	6.08487	11.7523
-34	10.4348	7.73013	13.1394	8.50776	5.89613	11.1194	10.3437	7.50153	13.1858	5.54443	2.5923	8.49656	8.65547	5.82762	11.4833
-33	10.9581	8.26624	13.6499	8.44179	5.81566	11.0679	10.0376	7.20155	12.8737	5.88169	2.9452	8.81818	8.66194	5.8116	11.5123
-32	11.2662	8.60236	13.93	8.34928	5.7008	10.9977	9.772	6.94773	12.5963	6.51409	3.58924	9.43895	8.91148	6.01839	11.8046
-31	11.3477	8.7154	13.9799	8.23978	5.5772	10.9024	9.58909	6.77096	12.4072	7.37013	4.43581	10.3045	9.35102	6.41796	12.2841
-30	11.2309	8.62229	13.8395	8.12734	5.45687	10.7978	9.42573	6.59963	12.2518	8.33073	5.37189	11.2896	9.96691	7.01031	12.9235
-29	10.8535	8.25542	13.4515	7.96584	5.29382	10.6379	9.28183	6.43602	12.1276	9.30234	6.32306	12.2816	10.6694	7.71186	13.6269
-28	10.2127	7.61597	12.8094	7.76603	5.08974	10.4423	9.13493	6.26432	12.0055	10.1813	7.19153	13.1712	11.3059	8.35804	14.2539
-27	9.45344	6.85796	12.0489	7.562	4.87342	10.2506	8.96149	6.07531	11.8477	10.8702	7.88778	13.8526	11.7267	8.7907	14.6626
-26	8.70912	6.11836	11.2999	7.39441	4.6883	10.1005	8.7325	5.85478	11.6102	11.2232	8.26029	14.1861	11.8844	8.95454	14.8143
-25	8.09818	5.52151	10.6749	7.338	4.61968	10.0563	8.57286	5.72487	11.4209	11.2626	8.31594	14.2093	11.7285	8.80425	14.6527
-24	7.66371	5.10034	10.2271	7.40593	4.68326	10.1286	8.51806	5.71852	11.3176	11.0042	8.05231	13.9561	11.2692	8.35964	14.1788
-23	7.57442	5.00453	10.1443	7.60009	4.88446	10.3157	8.52541	5.76107	11.2897	10.5438	7.56093	13.5266	10.611	7.72657	13.4954
-22	7.78872	5.18415	10.3933	7.92027	5.2284	10.6121	8.60928	5.84472	11.3738	9.97115	6.94336	12.999	9.7905	6.92675	12.6542
-21	8.25561	5.59174	10.9195	8.37117	5.71765	11.0247	8.82414	6.01569	11.6326	9.38615	6.30956	12.4627	8.95943	6.09557	11.8233
-20	8.91079	6.18141	11.6402	8.81902	6.21376	11.4243	9.05148	6.16687	11.9361	8.90951	5.80089	12.0181	8.30684	5.42285	11.1908
-19	9.67997	6.90649	12.4534	9.17406	6.61991	11.7282	9.25329	6.2899	12.2167	8.58646	5.47673	11.6962	7.94165	5.03104	10.8523
-18	10.3351	7.55489	13.1153	9.45939	6.94524	11.9735	9.39863	6.38499	12.4123	8.48625	5.40919	11.5633	7.75845	4.83509	10.6818
-17	10.7609	8.01241	13.5093	9.61644	7.11752	12.1154	9.46173	6.44411	12.4793	8.59832	5.58422	11.6124	7.79459	4.88311	10.7061
-16	10.951	8.25494	13.6471	9.55962	7.05321	12.066	9.41658	6.43286	12.4003	8.79695	5.8538	11.7401	7.93827	5.06246	10.8141
-15	10.895	8.24064	13.5494	9.43747	6.90729	11.9676	9.26634	6.33748	12.1952	8.99575	6.10723	11.8843	8.02375	5.18651	10.861
-14	10.5129	7.87636	13.1494	9.27576	6.72073	11.8308	9.12833	6.23931	12.0174	9.11622	6.25212	11.9803	8.0469	5.23459	10.8592
-13	9.85925	7.22107	12.4974	9.10826	6.53952	11.677	9.01052	6.13075	11.8903	9.12611	6.25364	11.9986	7.99089	5.18028	10.8015
-12	8.98804	6.34153	11.6345	8.99906	6.42828	11.5698	8.98219	6.0868	11.8776	9.00767	6.11401	11.9013	7.75099	4.92085	10.5811
-11	8.06681	5.41954	10.7141	8.98211	6.41599	11.5482	9.0995	6.17616	12.0228	8.7363	5.82361	11.649	7.43598	4.57534	10.2966
-10	7.13369	4.49409	9.7733	9.0775	6.51471	11.6403	9.25686	6.30763	12.2061	8.40016	5.48385	11.3165	7.12996	4.23669	10.0232
-9	6.30107	3.67424	8.9279	9.22565	6.66365	11.7877	9.39993	6.43191	12.3679	7.93224	5.02897	10.8355	6.88751	3.96747	9.80754
-8	5.68412	3.0629	8.30534	9.36465	6.80009	11.9292	9.46201	6.4746	12.4494	7.52357	4.63887	10.4083	6.82306	3.88467	9.76145
-7	5.36496	2.7406	7.98932	9.489	6.91799	12.06	9.32269	6.30433	12.341	7.25607	4.38378	10.1284	6.93898	3.9959	9.88206
-6	5.3725	2.73888	8.00611	9.54009	6.9607	12.1195	9.07879	6.03003	12.1275	7.10021	4.22879	9.97163	7.13032	4.19568	10.065
-5	5.71863	3.07488	8.36237	9.57251	6.98218	12.1628	8.68867	5.62912	11.7482	7.12777	4.24787	10.0077	7.40252	4.48941	10.3156
-4	6.37724	3.72482	9.02966	9.51751	6.91272	12.1223	8.18467	5.15171	11.2176	7.36643	4.47722	10.2556	7.78037	4.89212	10.6686
-3	7.24497	4.57763	9.91231	9.41101	6.79261	12.0294	7.64252	4.66708	10.618	7.75332	4.85528	10.6514	8.16081	5.29596	11.0256
-2	8.16129	5.47302	10.8496	9.31567	6.69256	11.9388	7.24045	4.3257	10.1552	8.29938	5.40156	11.1972	8.46052	5.60856	11.3125
-1	9.05911	6.3518	11.7664	9.28808	6.66768	11.9085	7.0581	4.1808	9.9354	8.92099	6.035	11.807	8.74423	5.89973	11.5887
0	9.77318	7.05726	12.4891	9.29405	6.67894	11.9092	7.05223	4.16321	9.94126	9.55437	6.69187	12.4169	9.10787	6.26692	11.9488
1	10.1703	7.46307	12.8775	9.25082	6.63447	11.8672	7.24689	4.31153	10.1822	10.175	7.34494	13.0051	9.45173	6.61262	12.2908
2	10.2592	7.58427	12.9342	9.15849	6.52852	11.7885	7.60129	4.61094	10.5916	10.6772	7.87725	13.4772	9.81443	6.97604	12.6528
3	10.1112	7.47425	12.7482	8.95602	6.30681	11.6052	7.96247	4.937	10.9879	11.0251	8.24165	13.8085	10.203	7.36581	13.0403
4	9.75338	7.13858	12.3682	8.61152	5.93939	11.2836	8.32387	5.30931	11.3384	11.1416	8.35427	13.929	10.5026	7.66831	13.3369
5	9.25257	6.62991	11.8752	8.17109	5.48876	10.8534	8.65449	5.68615	11.6228	11.0759	8.26337	13.8885	10.606	7.77825	13.4338
6	8.69946	6.04556	11.3534	7.72312	5.04359	10.4026	8.83355	5.93228	11.7348	10.7522	7.89677	13.6077	10.4708	7.65955	13.282
7	8.27378	5.58222	10.9653	7.29493	4.62799	9.96187	8.8719	6.03675	11.7071	10.2863	7.3793	13.1932	10.0815	7.28861	12.8744
8	7.969	5.2547	10.6833	7.0285	4.37522	9.68177	8.86433	6.07511	11.6536	9.62658	6.67378	12.5794	9.45375	6.67662	12.2309
9	7.90401	5.19351	10.6145	6.9693	4.32905	9.60955	8.80442	6.02306	11.5858	8.90187	5.91858	11.8852	8.80278	6.03168	11.5739
10	8.05317	5.36618	10.7402	7.11646	4.48394	9.74898	8.73648	5.93767	11.5353	8.1343	5.13762	11.131	8.18464	5.41281	10.9565
11	8.28531	5.62561	10.945	7.53137	4.89799	10.1647	8.64727	5.82076	11.4738	7.38651	4.39359	10.3794	7.69548	4.92572	10.4652
12	8.55976	5.91333	11.2062	8.11112	5.46776	10.7545	8.55518	5.69967	11.4107	6.82767	3.85287	9.80246	7.54913	4.78528	10.313
13	8.88403	6.22157	11.5465	8.64097	5.99258	11.2893	8.49712	5.61747	11.3768	6.43812	3.48514	9.3911	7.74981	4.99587	10.5038
14	9.23663	6.54492	11.9283	9.10329	6.45632	11.7503	8.43539	5.54594	11.3248	6.2149	3.27678	9.15302	8.27761	5.52521	11.03
15	9.5617	6.84492	12.2785	9.34405	6.70742	11.9807	8.38949	5.5005	11.2785	6.28353	3.3449	9.22216	9.03323	6.26601	11.8004
16	9.85448	7.13227	12.5767	9.37783	6.75763	11.998	8.40331	5.52624	11.2804	6.5475	3.59545	9.49954	9.79529	6.99707	12.5935
17	10.0247	7.32361	12.7258	9.13514	6.53511	11.7352	8.50434	5.65185	11.3568	7.0606	4.09007	10.0311	10.4168	7.58534	13.2483
18	10.1649	7.49908	12.8307	8.76028	6.17695	11.3436	8.72571	5.9006	11.5508	7.65173	4.65674	10.6467	10.825	7.97611	13.6739
19	10.2156	7.57978	12.8514	8.33821	5.75648	10.9199	9.08941	6.28534	11.8935	8.35189	5.34207	11.3617	10.9555	8.11252	13.7985
20	10.1471	7.52285	12.7714	7.94844	5.35844	10.5384	9.4813	6.68153	12.2811	8.95834	5.95794	11.9587	10.6733	7.85096	13.4957
21	9.99475	7.35932	12.6302	7.69418	5.09028	10.2981	9.9622	7.14881	12.7756	9.40527	6.43348	12.3771	10.1236	7.31813	12.929
22	9.70522	7.05441	12.356	7.62236	5.00962	10.2351	10.4213	7.5795	13.2631	9.67243	6.74047	12.6044	9.40873	6.59567	12.2218
23	9.33508	6.67496	11.9952	7.62431	5.00874	10.2399	10.7906	7.91708	13.6642	9.68573	6.78468	12.5868	8.67674	5.83018	11.5233
24	8.93527	6.27463	11.5959	7.76291	5.15444	10.3714	11.0747	8.17609	13.9733	9.54044	6.64201	12.4389	7.97152	5.07678	10.8663
25	8.58673	5.93567	11.2378	7.90884	5.30923	10.5084	11.2397	8.3229	14.1565	9.29419	6.37035	12.218	7.40727	4.47673	10.3378
26	8.34449	5.70943	10.9795	7.96901	5.37511	10.5629	11.2353	8.30672	14.164	8.97876	6.02382	11.9337	7.04443	4.10777	9.98109
27	8.15922	5.5375	10.781	7.94493	5.35919	10.5307	11.1741	8.24638	14.1018	8.76348	5.79944	11.7275	6.87421	3.95609	9.79232
28	8.18395	5.56415	10.8038	7.83447	5.25883	10.4101	11.1427	8.21158	14.0737	8.63783	5.70617	11.5695	6.86415	3.97216	9.75614
29	8.34798	5.72477	10.9712	7.63637	5.07823	10.1945	11.0888	8.15368	14.024	8.67108	5.80225	11.5399	7.05163	4.18145	9.92181
30	8.61176	5.97567	11.2478	7.3658	4.8179	9.9137	10.9471	8.0147	13.8796	8.82795	6.01744	11.6385	7.34262	4.47354	10.2117
31	8.9047	6.25596	11.5534	7.12195	4.55811	9.68578	10.7423	7.81481	13.6698	9.02502	6.24022	11.8098	7.74993	4.87209	10.6278
32	9.16489	6.50364	11.8261	6.96523	4.35265	9.5778	10.4697	7.55797	13.3814	9.24529	6.44257	12.048	8.24717	5.35903	11.1353
33	9.33906	6.67241	12.0057	6.94154	4.26251	9.62057	10.0534	7.16626	12.9405	9.38817	6.53586	12.2405	8.74857	5.8525	11.6446
34	9.38754	6.72574	12.0493	7.09328	4.35813	9.82844	9.49294	6.63206	12.3538	9.41741	6.50235	12.3325	9.27209	6.37159	12.1726
35	9.32441	6.67678	11.972	7.35393	4.59924	10.1086	8.84478	6.0065	11.6831	9.30678	6.33856	12.275	9.71869	6.81956	12.6178
36	9.25938	6.62893	11.8898	7.7069	4.97628	10.4375	8.12017	5.29772	10.9426	9.20166	6.19409	12.2092	10.0402	7.14667	12.9336
37	9.21271	6.58845	11.837	8.05315	5.37757	10.7287	7.54162	4.72907	10.3542	9.06839	6.03881	12.098	10.1993	7.31421	13.0845
38	9.31828	6.68728	11.9493	8.43096	5.80416	11.0578	7.21771	4.41396	10.0215	8.9678	5.9353	12.0003	10.1782	7.30121	13.0552
39	9.67876	7.02829	12.3292	8.85686	6.24756	11.4662	7.18589	4.39299	9.9788	8.92512	5.91045	11.9398	9.92674	7.05925	12.7942
40	10.2836	7.60596	12.9613	9.34136	6.71807	11.9646	7.47166	4.69312	10.2502	8.92736	5.94828	11.9064	9.51468	6.65068	12.3787
41	11.1148	8.41325	13.8164	9.87339	7.22608	12.5207	8.10441	5.33258	10.8762	9.02494	6.08705	11.9628	9.12828	6.25572	12.0008
42	12.0494	9.34291	14.7558	10.4608	7.80122	13.1204	9.02676	6.24208	11.8114	9.15338	6.25031	12.0565	8.77975	5.88801	11.6715
43	12.9593	10.2747	15.6439	11.1154	8.46363	13.7672	9.99663	7.18308	12.8102	9.25046	6.36199	12.1389	8.66374	5.75404	11.5734
44	13.5466	10.9011	16.1922	11.6479	9.01179	14.2841	10.8694	8.02461	13.7142	9.3028	6.4107	12.1949	8.78736	5.87377	11.7009
45	13.5825	10.9867	16.1783	11.9821	9.3444	14.6199	11.4755	8.61766	14.3333	9.233	6.33069	12.1353	9.08864	6.18917	11.9881
46	12.9505	10.3957	15.5053	11.8712	9.21083	14.5316	11.7613	8.92118	14.6014	9.10865	6.20255	12.0147	9.54489	6.66697	12.4228
47	11.6258	9.08991	14.1617	11.1513	8.45692	13.8458	11.6538	8.85348	14.4541	8.90838	6.01226	11.8045	10.15	7.29247	13.0075
48	9.65506	7.10638	12.2037	9.70287	6.98472	12.421	11.261	8.49626	14.0257	8.7373	5.85591	11.6187	10.7765	7.93542	13.6176
49	7.29386	4.70495	9.88278	7.50087	4.78915	10.2126	10.5443	7.78945	13.2992	8.64693	5.76953	11.5243	11.2508	8.41268	14.0888
50	4.82299	2.18027	7.46572	4.70312	2.02558	7.38066	9.77482	6.99605	12.5536	8.66506	5.77337	11.5568	11.4992	8.6551	14.3432
51	2.56533	-0.125283	5.25595	1.58668	-1.04957	4.22293	8.91924	6.10038	11.7381	8.88119	5.95599	11.8064	11.6575	8.80324	14.5117
52	0.770617	-1.94737	3.48861	-1.51936	-4.1339	1.09518	8.08069	5.22297	10.9384	9.22313	6.26529	12.181	11.735	8.86719	14.6027
53	-0.351017	-3.06983	2.36779	-4.10199	-6.72381	-1.48017	7.24269	4.36732	10.1181	9.69398	6.71465	12.6733	11.759	8.8785	14.6395
54	-0.747592	-3.44371	1.94853	-5.81819	-8.46476	-3.17161	6.44333	3.56983	9.31683	10.2977	7.31421	13.2812	11.7497	8.85388	14.6456
55	-0.484285	-3.15289	2.18432	-6.38848	-9.05901	-3.71795	5.57004	2.7065	8.43358	10.9061	7.93509	13.8771	11.813	8.90258	14.7234
56	0.207859	-2.44111	2.85683	-5.6793	-8.3554	-3.0032	4.68731	1.8209	7.55372	11.4879	8.52548	14.4504	12.0234	9.10299	14.9439
57	1.30985	-1.33902	3.95873	-3.71581	-6.37439	-1.05722	3.80465	0.914106	6.6952	11.9746	9.01094	14.9382	12.3041	9.38059	15.2277
58	2.61504	-0.0440217	5.2741	-0.769757	-3.39645	1.85694	2.9672	0.0375646	5.89683	12.3984	9.43348	15.3633	12.6008	9.68179	15.5198
59	3.97041	1.30634	6.63448	2.90961	0.311699	5.50751	2.20872	-0.755878	5.17331	12.6976	9.73536	15.6598	12.8994	9.98528	15.8136
60	5.4534	2.79484	8.11197	6.88348	4.29655	9.47042	1.71468	-1.27124	4.7006	12.8588	9.9067	15.811	13.17	10.254	16.0859
61	6.97492	4.32939	9.62045	10.7084	8.11349	13.3032	1.63873	-1.33709	4.61456	12.8863	9.94795	15.8246	13.3496	10.4252	16.274
62	8.57822	5.94364	11.2128	14.0302	11.4148	16.6457	2.04938	-0.89423	4.993	12.6999	9.77118	15.6285	13.449	10.5136	16.3844
63	10.2278	7.58684	12.8687	16.6153	13.9786	19.252	2.96466	0.0626486	5.86666	12.3108	9.38058	15.241	13.6567	10.7163	16.5971
64	11.8528	9.17977	14.5258	18.1934	15.5487	20.8381	4.40484	1.53404	7.27564	11.6897	8.7516	14.6278	13.8748	10.9405	16.8092
65	13.2644	10.5535	15.9752	18.7363	16.0999	21.3727	6.18179	3.31767	9.04591	10.8705	7.92333	13.8177	14.2185	11.2991	17.1378
66	14.2887	11.5547	17.0228	18.2195	15.6139	20.825	8.17485	5.30121	11.0485	9.81712	6.86643	12.7678	14.7069	11.8032	17.6106
67	14.6592	11.9381	17.3803	16.8314	14.2684	19.3943	10.1239	7.23613	13.0116	8.5428	5.60101	11.4846	15.2784	12.3825	18.1744
68	14.3425	11.663	17.022	14.7375	12.2129	17.2621	11.8012	8.91253	14.6899	7.2528	4.3228	10.1828	15.8378	12.9359	18.7398
69	13.2339	10.6017	15.866	12.152	9.65577	14.6482	12.9193	10.0496	15.7891	5.9954	3.07902	8.91177	16.3247	13.407	19.2423
70	11.4766	8.86791	14.0853	9.3598	6.86826	11.8513	13.4134	10.5749	16.2519	4.91839	2.00691	7.82988	16.6134	13.678	19.5489
71	9.23629	6.61033	11.8622	6.59088	4.07438	9.10737	13.2792	10.4589	16.0995	4.13344	1.21837	7.04852	16.5773	13.6331	19.5214
72	6.87075	4.19752	9.54399	4.15263	1.59209	6.71317	12.4806	9.65467	15.3065	3.82477	0.899557	6.74999	16.2901	13.3572	19.2231
73	4.62035	1.89614	7.34455	2.2275	-0.387666	4.84267	11.1675	8.31842	14.0166	3.99855	1.05491	6.9422	15.7174	12.8124	18.6223
74	2.73824	-0.0114319	5.48791	0.959769	-1.69895	3.61848	9.47161	6.60129	12.3419	4.58319	1.62189	7.54449	14.8764	12.0089	17.7439
75	1.48319	-1.26183	4.22822	0.43802	-2.23041	3.10645	7.6554	4.77965	10.5311	5.49951	2.53489	8.46413	13.8937	11.0558	16.7317
76	0.946812	-1.76914	3.66276	0.659565	-1.98823	3.30736	5.99996	3.14393	8.85598	6.66184	3.70986	9.61381	12.9509	10.1234	15.7783
77	1.02782	-1.65072	3.70635	1.52377	-1.08164	4.12918	4.73565	1.91187	7.55943	7.85478	4.93042	10.7791	12.0714	9.23409	14.9087
78	1.721	-0.926883	4.36888	2.90402	0.344393	5.46364	3.92821	1.12951	6.72692	8.90058	6.01013	11.791	11.2502	8.3931	14.1073
79	2.83827	0.212557	5.46399	4.63455	2.10039	7.16871	3.75094	0.95566	6.54622	9.69612	6.83189	12.5603	10.4392	7.56251	13.3159
80	4.39709	1.78108	7.0131	6.5634	4.02445	9.10236	4.09759	1.28903	6.90616	10.0619	7.20539	12.9185	9.80354	6.92573	12.6814
81	6.21787	3.59699	8.83874	8.48507	5.92168	11.0485	5.02812	2.20407	7.85217	9.97245	7.10148	12.8434	9.22254	6.36066	12.0844
82	8.3658	5.7301	11.0015	10.3196	7.72449	12.9146	6.35291	3.51778	9.18804	9.41242	6.51257	12.3123	8.71889	5.88494	11.5528
83	10.6943	8.03624	13.3524	11.9701	9.35485	14.5854	7.83853	4.98958	10.6875	8.51001	5.58512	11.4349	8.31738	5.50871	11.126
84	13.2514	10.5711	15.9318	13.362	10.7396	15.9843	9.35966	6.4836	12.2357	7.49852	4.55221	10.4448	8.01109	5.21643	10.8057
85	15.9534	13.2677	18.6392	14.5039	11.8836	17.1242	10.7827	7.86528	13.7001	6.49042	3.5357	9.44515	7.87612	5.08099	10.6712
86	18.7032	16.0397	21.3668	15.3526	12.7336	17.9715	12.0135	9.04883	14.9782	5.59989	2.63433	8.56544	7.8558	5.04983	10.6618
87	21.3619	18.7399	23.9838	15.817	13.1921	18.442	13.0006	10.0147	15.9865	5.06969	2.09103	8.04834	7.95039	5.13612	10.7647
88	23.699	21.1203	26.2777	16.0201	13.3891	18.6511	13.6851	10.7166	16.6535	5.01884	2.02707	8.01061	8.12254	5.30783	10.9373
89	25.5754	23.014	28.1367	16.0238	13.3969	18.6508	14.0899	11.179	17.0007	5.58279	2.58774	8.57783	8.31753	5.51174	11.1233
90	26.8473	24.2633	29.4313	15.7991	13.185	18.4132	14.2695	11.4293	17.1096	6.6855	3.70966	9.66135	8.44848	5.65484	11.2421
91	27.4138	24.7755	30.052	15.4713	12.8773	18.0654	14.3203	11.5304	17.1103	8.19379	5.26021	11.1274	8.43914	5.65421	11.2241
92	27.4511	24.7569	30.1452	15.1393	12.5678	17.7108	14.3128	11.5269	17.0987	10.0884	7.19392	12.9829	8.33239	5.5392	11.1256
93	27.0392	24.32	29.7584	14.9399	12.3756	17.5042	14.2141	11.394	17.0342	12.1581	9.27872	15.0375	8.08459	5.27133	10.8978
94	26.3601	23.653	29.0673	14.9063	12.3263	17.4862	14.1112	11.2412	16.9811	14.1698	11.2679	17.0718	7.80319	4.96149	10.6449
95	25.6455	22.9792	28.3119	15.1346	12.5224	17.7469	13.9934	11.0877	16.8991	16.0078	13.0661	18.9495	7.56838	4.70296	10.4338
96	25.1917	22.5732	27.8102	15.6431	12.9963	18.2899	13.8635	10.9497	16.7773	17.4943	14.5197	20.4689	7.44845	4.5695	10.3274
97	25.2053	22.614	27.7966	16.4424	13.7763	19.1085	13.8161	10.9232	16.709	18.5614	15.5831	21.5397	7.53459	4.65371	10.4155
98	25.6985	23.0993	28.2976	17.4215	14.7548	20.0883	13.7872	10.9334	16.641	19.1624	16.222	22.1027	7.92548	5.04954	10.8014
99	26.7006	24.0661	29.3351	18.5826	15.9297	21.2356	13.8701	11.0556	16.6846	19.3003	16.4199	22.1806	8.58139	5.70852	11.4543
100	28.2461	25.5716	30.9206	19.7865	17.1508	22.4222	14.0465	11.2654	16.8277	19.0149	16.1887	21.8412	9.39982	6.52233	12.2773
101	30.1327	27.4256	32.8398	21.0395	18.4161	23.663	14.4147	11.6542	17.1753	18.4415	15.6424	21.2407	10.3099	7.41183	13.208
102	32.1521	29.4316	34.8727	22.2963	19.68	24.9126	14.9926	12.2401	17.7451	17.6662	14.8566	20.4758	11.2213	8.28713	14.1556
103	34.1558	31.4424	36.8692	23.5243	20.9098	26.1388	15.7374	12.9798	18.495	16.7779	13.9341	19.6217	12.0326	9.05635	15.0088
104	35.9085	33.2177	38.5992	24.724	22.1123	27.3358	16.7068	13.9376	19.4761	15.9609	13.0741	18.8476	12.682	9.67355	15.6905
105	37.2473	34.5867	39.9079	25.9835	23.3773	28.5896	17.8588	15.0618	20.6557	15.3379	12.41	18.2658	13.201	10.1784	16.2236
106	38.0548	35.4268	40.6827	27.295	24.6883	29.9016	19.1792	16.3435	22.0149	15.039	12.0846	17.9933	13.6053	10.5911	16.6195
107	38.2198	35.6179	40.8216	28.7404	26.1237	31.3572	20.5159	17.64	23.3918	15.1656	12.2099	18.1214	13.9402	10.9522	16.9282
108	37.79	35.1993	40.3808	30.2283	27.5894	32.8671	21.8069	18.9045	24.7094	15.8233	12.8957	18.751	14.2666	11.3121	17.221
109	36.8266	34.2301	39.4231	31.7369	29.0718	34.402	22.9965	20.0879	25.905	16.8756	13.9995	19.7517	14.7278	11.8108	17.6449
110	35.3822	32.7676	37.9968	33.1987	30.5187	35.8787	23.987	21.1018	26.8722	18.214	15.3874	21.0405	15.3122	12.4255	18.1989
111	33.5453	30.9096	36.1811	34.478	31.7956	37.1604	24.7737	21.9294	27.6181	19.7503	16.9437	22.5568	16.0149	13.1618	18.868
112	31.4019	28.7499	34.0539	35.4392	32.7666	38.1118	25.3006	22.4923	28.1088	21.2037	18.3728	24.0347	16.8637	14.0469	19.6805
113	29.1166	26.4585	31.7747	35.9197	33.2597	38.5798	25.6699	22.8723	28.4674	22.3988	19.5064	25.2912	17.683	14.8893	20.4767
114	26.8619	24.2042	29.5197	35.8959	33.2417	38.5501	25.8	22.9766	28.6234	23.1974	20.2363	26.1585	18.5027	15.7124	21.293
115	24.7243	22.0666	27.382	35.2891	32.6263	37.952	25.788	22.9174	28.6587	23.4828	20.4781	26.4874	19.2208	16.4153	22.0262
116	22.7821	20.1248	25.4394	34.0765	31.4	36.7529	25.6753	22.752	28.5986	23.3104	20.3075	26.3132	19.8896	17.0666	22.7125
117	21.1094	18.449	23.7697	32.4261	29.7407	35.1115	25.4538	22.4978	28.4097	22.7836	19.8264	25.7407	20.4618	17.6308	23.2928
118	19.6528	16.9907	22.315	30.578	27.8994	33.2566	25.1334	22.179	28.0878	22.0908	19.2028	24.9788	20.9544	18.1334	23.7755
119	18.3991	15.7344	21.0638	28.6272	25.9734	31.281	24.7994	21.8823	27.7165	21.3642	18.5356	24.1928	21.362	18.557	24.167
120	17.1897	14.5177	19.8617	26.7465	24.1252	29.3678	24.5082	21.6433	27.3732	20.7434	17.949	23.5377	21.6754	18.8841	24.4667
121	16.0753	13.3912	18.7595	25.0835	22.486	27.6811	24.2768	21.4583	27.0954	20.3911	17.5958	23.1864	21.88	19.0837	24.6763
122	14.9573	12.2629	17.6516	23.7193	21.1245	26.3142	23.9878	21.1908	26.7848	20.2788	17.4492	23.1085	22.0315	19.2204	24.8426
123	13.7624	11.0677	16.457	22.6533	20.0446	25.2621	23.7352	20.924	26.5464	20.2941	17.4132	23.175	22.0219	19.1924	24.8514
124	12.4879	9.81276	15.163	21.7741	19.145	24.4032	23.4244	20.5724	26.2765	20.2968	17.3542	23.2394	21.8842	19.0428	24.7256
125	11.328	8.69287	13.9632	20.9501	18.3082	23.592	23.03	20.1398	25.9202	20.2787	17.2899	23.2674	21.5225	18.6814	24.3635
126	10.4442	7.85647	13.032	20.0892	17.4495	22.729	22.4907	19.5819	25.3996	20.0312	17.0288	23.0336	21.0087	18.1762	23.8412
127	9.95726	7.40972	12.5048	19.0762	16.4507	21.7017	21.7838	18.883	24.6846	19.543	16.5555	22.5305	20.3629	17.5381	23.1877
128	9.90558	7.37687	12.4343	17.9496	15.3321	20.5672	20.9432	18.0714	23.815	18.9042	15.955	21.8535	19.665	16.8432	22.4868
129	10.3043	7.77391	12.8347	16.6933	14.0732	19.3133	19.927	17.0892	22.7649	18.2437	15.3336	21.1539	19.0054	16.1861	21.8247
130	11.0785	8.53161	13.6255	15.5743	12.9405	18.2082	18.8908	16.0759	21.7058	17.6927	14.805	20.5805	18.3826	15.5646	21.2007
131	11.9797	9.41208	14.5473	14.694	12.0434	17.3445	17.8543	15.0465	20.6621	17.3849	14.4964	20.2733	17.8831	15.0664	20.6999
132	12.8513	10.2635	15.4391	14.0996	11.4402	16.7589	16.9568	14.1385	19.775	17.426	14.5153	20.3368	17.618	14.8009	20.435
133	13.3579	10.7489	15.967	13.9811	11.3259	16.6363	16.3494	13.509	19.1897	17.8821	14.9447	20.8195	17.5247	14.7086	20.3408
134	13.3054	10.6739	15.9369	14.3408	11.6934	16.9883	16.0758	13.2097	18.9419	18.6057	15.6516	21.5598	17.5737	14.764	20.3834
135	12.6139	9.96041	15.2674	14.9959	12.3542	17.6375	16.1824	13.2946	19.0702	19.4587	16.4923	22.4251	17.7339	14.9361	20.5317
136	11.2921	8.62061	13.9636	15.886	13.2495	18.5225	16.7068	13.8045	19.6092	20.3018	17.3296	23.274	17.9808	15.2004	20.7611
137	9.51604	6.83466	12.1974	16.7322	14.0907	19.3737	17.4898	14.5893	20.3904	20.9728	17.9931	23.9524	18.2664	15.5008	21.0321
138	7.48975	4.80483	10.1747	17.2725	14.6198	19.9251	18.4509	15.5738	21.3281	21.296	18.3012	24.2908	18.4777	15.7161	21.2394
139	5.47974	2.79215	8.16733	17.4177	14.7509	20.0846	19.3641	16.5255	22.2026	21.2076	18.1919	24.2233	18.6286	15.858	21.3991
140	3.74293	1.04195	6.44392	17.1097	14.4237	19.7956	20.0619	17.248	22.8757	20.6746	17.6351	23.7141	18.7325	15.9342	21.5309
141	2.61151	-0.115397	5.33841	16.2242	13.5138	18.9346	20.4233	17.6099	23.2367	19.8259	16.7668	22.885	18.81	15.9691	21.6509
142	2.13153	-0.619622	4.88269	14.8584	12.1228	17.5939	20.3177	17.4753	23.1602	18.6591	15.5861	21.7321	18.7249	15.8355	21.6143
143	2.40638	-0.355378	5.16814	13.1963	10.4471	15.9454	19.664	16.7804	22.5477	17.3137	14.2444	20.383	18.5503	15.6185	21.482
144	3.33141	0.583913	6.0789	11.3817	8.64261	14.1207	18.4924	15.5756	21.4093	15.9432	12.8928	18.9935	18.293	15.3444	21.2415
145	4.72646	2.02212	7.43081	9.5494	6.84479	12.254	16.9414	14.0147	19.868	14.6826	11.6629	17.7024	17.9968	15.065	20.9286
146	6.40914	3.75987	9.05842	7.89845	5.24084	10.5561	15.1623	12.2548	18.0699	13.6491	10.6599	16.6382	17.6579	14.7764	20.5394
147	8.12076	5.51781	10.7237	6.58086	3.9619	9.19981	13.3792	10.5031	16.2552	12.8557	9.88425	15.8272	17.2504	14.4362	20.0645
148	9.78221	7.20168	12.3627	5.63064	3.01682	8.24445	11.768	8.91693	14.6191	12.3775	9.40089	15.3541	16.7792	14.0278	19.5305
149	11.186	8.6004	13.7717	5.02361	2.37976	7.66747	10.5247	7.68268	13.3667	12.3077	9.30287	15.3125	16.2685	13.5457	18.9912
150	12.2761	9.67029	14.8818	4.85057	2.16129	7.53986	9.64871	6.80539	12.492	12.5471	9.50433	15.5899	15.7048	12.9739	18.4357
151	13.0493	10.4203	15.6783	5.13124	2.40738	7.85509	9.21843	6.3759	12.061	12.9627	9.89388	16.0316	15.1186	12.3573	17.8798
152	13.4843	10.8343	16.1342	5.82919	3.09763	8.56075	9.2463	6.41564	12.077	13.5354	10.4562	16.6146	14.4789	11.6888	17.2689
153	13.6174	10.9462	16.2887	6.81815	4.10058	9.53572	9.57592	6.7696	12.3822	13.9821	10.9116	17.0526	13.8962	11.0898	16.7025
154	13.5466	10.8477	16.2454	8.04891	5.35697	10.7408	10.036	7.25692	12.815	14.3098	11.2591	17.3605	13.3202	10.5142	16.1262
155	13.3447	10.6169	16.0725	9.39209	6.71761	12.0666	10.4291	7.65829	13.1998	14.3528	11.3249	17.3808	12.8955	10.098	15.693
156	13.1454	10.3988	15.8919	10.6748	8.00504	13.3446	10.6937	7.90797	13.4795	14.087	11.074	17.1001	12.5544	9.75668	15.3522
157	13.0318	10.2784	15.7852	11.7791	9.11212	14.4461	10.763	7.94656	13.5795	13.4478	10.4354	16.4603	12.2517	9.44459	15.0589
158	12.9165	10.1747	15.6582	12.553	9.89333	15.2127	10.5589	7.70956	13.4083	12.543	9.52338	15.5626	12.0653	9.24006	14.8906
159	12.9093	10.1964	15.6221	12.9456	10.3044	15.5868	10.2027	7.32589	13.0795	11.4712	8.43785	14.5045	11.9409	9.09653	14.7852
160	13.0559	10.3827	15.7292	12.9369	10.3136	15.5602	9.74392	6.85257	12.6353	10.405	7.36067	13.4494	11.8281	8.96598	14.6902
161	13.2621	10.6237	15.9005	12.4594	9.8402	15.0786	9.31373	6.42455	12.2029	9.49931	6.46353	12.5351	11.7762	8.89319	14.6592
162	13.4522	10.8369	16.0675	11.8097	9.18329	14.4361	9.07181	6.19296	11.9507	8.88979	5.88302	11.8966	11.6975	8.79804	14.5969
163	13.6278	11.0185	16.2371	11.0727	8.43888	13.7066	9.0964	6.23166	11.9611	8.57138	5.61106	11.5317	11.5666	8.66026	14.473
164	13.6906	11.0691	16.3121	10.3745	7.74347	13.0056	9.33696	6.48746	12.1865	8.61567	5.70356	11.5278	11.3396	8.44159	14.2376
165	13.6907	11.0535	16.328	9.88104	7.26991	12.4922	9.83263	6.99596	12.6693	8.92969	6.05152	11.8079	11.0299	8.15935	13.9004
166	13.5891	10.9389	16.2393	9.68484	7.10001	12.2697	10.3848	7.54345	13.2261	9.35389	6.48172	12.2261	10.7499	7.90918	13.5906
167	13.3996	10.7467	16.0525	9.76242	7.19306	12.3318	10.9353	8.0759	13.7946	9.73248	6.84783	12.6171	10.3999	7.57928	13.2206
168	13.0825	10.4342	15.7308	10.1229	7.54162	12.7042	11.3712	8.48609	14.2564	10.0315	7.12966	12.9333	10.1361	7.31094	12.9613
169	12.702	10.0622	15.3418	10.6728	8.06427	13.2814	11.596	8.68881	14.5032	10.0634	7.15437	12.9724	9.98533	7.12766	12.843
170	12.3069	9.66407	14.9497	11.2677	8.62882	13.9065	11.612	8.70032	14.5236	9.93004	7.02572	12.8344	9.88566	6.99459	12.7767
171	11.8032	9.14411	14.4623	11.7411	9.08785	14.3943	11.2876	8.39216	14.183	9.65835	6.76073	12.556	9.85069	6.94339	12.758
172	11.1818	8.49877	13.8648	12.0538	9.40607	14.7015	10.7544	7.89487	13.614	9.33739	6.43678	12.238	9.83153	6.93582	12.7272
173	10.4725	7.76857	13.1765	12.1638	9.53683	14.7908	10.1244	7.30129	12.9474	9.11846	6.20338	12.0335	9.80586	6.94789	12.6638
174	9.62072	6.90971	12.3317	12.0533	9.45322	14.6534	9.48925	6.69463	12.2839	9.1101	6.17143	12.0488	9.68642	6.86562	12.5072
175	8.71605	6.01247	11.4196	11.7458	9.16902	14.3226	8.96516	6.18737	11.7429	9.3221	6.36418	12.28	9.42894	6.62196	12.2359
176	7.79466	5.10751	10.4818	11.2901	8.73069	13.8496	8.66505	5.8897	11.4404	9.66057	6.69659	12.6246	9.02423	6.1983	11.8502
177	7.05443	4.37909	9.72977	10.8027	8.25133	13.3541	8.54409	5.75102	11.3372	10.0124	7.05671	12.9681	8.492	5.62359	11.3604
178	6.56758	3.89033	9.24484	10.298	7.74177	12.8542	8.67499	5.85064	11.4993	10.2823	7.34164	13.2229	7.90344	4.99417	10.8127
179	6.34678	3.65723	9.03633	9.83989	7.2658	12.414	8.94172	6.07991	11.8035	10.372	7.44741	13.2967	7.36658	4.43673	10.2964
180	6.55484	3.8549	9.25479	9.48317	6.88072	12.0856	9.33971	6.45057	12.2289	10.1364	7.22254	13.0502	6.98705	4.06014	9.91396
181	7.20092	4.49893	9.90291	9.19407	6.56341	11.8247	9.76748	6.8769	12.6581	9.67842	6.77433	12.5825	6.82545	3.91463	9.73626
182	8.1857	5.49402	10.8774	8.92004	6.26867	11.5714	10.1006	7.2386	12.9625	8.98484	6.08675	11.8829	6.96993	4.07485	9.86501
183	9.41777	6.73955	12.096	8.62922	5.96669	11.2917	10.2505	7.43519	13.0659	8.24512	5.34855	11.1417	7.37944	4.49963	10.2593
184	10.8354	8.16416	13.5066	8.3666	5.69977	11.0334	10.2042	7.4303	12.9782	7.55163	4.66435	10.4389	7.93722	5.0783	10.7961
185	12.2327	9.54967	14.9156	8.13527	5.46389	10.8067	10.0857	7.32844	12.843	7.03003	4.16326	9.89679	8.5382	5.70959	11.3668
186	13.4433	10.7343	16.1523	7.92876	5.25273	10.6048	9.94173	7.16607	12.7174	6.80606	3.96213	9.64999	8.99497	6.20005	11.7899
187	14.3252	11.5866	17.0639	7.86436	5.18875	10.54	9.75218	6.94164	12.5627	6.86545	4.04327	9.68763	9.28963	6.51496	12.0643
188	14.7727	12.0145	17.5309	7.90221	5.23468	10.5697	9.60493	6.76226	12.4476	7.14458	4.32785	9.96131	9.36934	6.59402	12.1447
189	14.8145	12.0514	17.5776	7.97515	5.32401	10.6263	9.60824	6.75787	12.4586	7.47969	4.64565	10.3137	9.11598	6.32623	11.9057
190	14.3847	11.6294	17.1401	8.12623	5.48788	10.7646	9.7543	6.91924	12.5893	7.74313	4.87321	10.6131	8.67233	5.86948	11.4752
191	13.5188	10.7723	16.2652	8.38494	5.74341	11.0265	10.0299	7.21919	12.8407	7.80463	4.90191	10.7073	8.10875	5.30527	10.9122
192	12.4208	9.67756	15.1639	8.61793	5.95491	11.281	10.3183	7.52618	13.1105	7.62146	4.69289	10.55	7.46887	4.67257	10.2652
193	11.0463	8.29998	13.7926	8.8068	6.10997	11.5036	10.5887	7.79572	13.3817	7.21141	4.27332	10.1495	6.93758	4.13639	9.73876
194	9.5578	6.81315	12.3025	8.92134	6.19651	11.6462	10.81	8.00674	13.6132	6.70635	3.76069	9.65201	6.59044	3.76132	9.41955
195	8.08626	5.35756	10.815	8.89171	6.15453	11.6289	10.9147	8.10544	13.724	6.17883	3.21174	9.14593	6.54473	3.6691	9.42037
196	6.72286	4.0143	9.43142	8.70577	5.9758	11.4357	10.9478	8.14178	13.7539	5.78061	2.77772	8.78351	6.65596	3.73925	9.57266
197	5.49913	2.8097	8.18855	8.42167	5.71166	11.1317	10.9473	8.15597	13.7386	5.79129	2.75408	8.8285	6.92703	3.99635	9.85771
198	4.53575	1.85509	7.21641	8.05974	5.37635	10.7431	10.9202	8.13784	13.7026	6.17746	3.11988	9.23505	7.30215	4.39741	10.2069
199	3.85203	1.17397	6.5301	7.66873	5.01252	10.3249	10.9163	8.13162	13.7009	6.99963	3.95013	10.0491	7.64357	4.78478	10.5024
200	3.44332	0.765871	6.12077	7.15433	4.52661	9.78206	10.9462	8.14159	13.7509	8.1788	5.16105	11.1966	7.90915	5.08538	10.7329

## Sheet: Panel_B
time	vEyeVel_Vertical_Mean	vEyeVel_Vertical_95ci_low	vEyeVel_Vertical_95ci_up	vEyeVel_ObliqueL_Mean	vEyeVel_ObliqueL_95ci_low	vEyeVel_ObliqueL_95ci_up	vEyeVel_Horizontal_Mean	vEyeVel_Horizontal_95ci_low	vEyeVel_Horizontal_95ci_up	vEyeVel_ObliqueR_Mean	vEyeVel_ObliqueR_95ci_low	vEyeVel_ObliqueR_95ci_up
-100	9.47033	6.59122	12.3494	10.1025	7.41503	12.79	10.5211	7.95359	13.0885	11.034	8.3105	13.7575
-99	9.61281	6.76549	12.4601	9.71987	7.01284	12.4269	9.92967	7.37385	12.4855	10.7908	8.07994	13.5017
-98	9.89091	7.07255	12.7093	9.33678	6.61492	12.0586	9.46416	6.91958	12.0087	10.5165	7.83802	13.1949
-97	10.2376	7.43465	13.0405	8.97195	6.24648	11.6974	9.19769	6.66195	11.7334	10.3132	7.68281	12.9435
-96	10.5258	7.72505	13.3266	8.59182	5.88738	11.2963	9.13653	6.61208	11.661	10.073	7.4962	12.6498
-95	10.677	7.86754	13.4864	8.23474	5.56496	10.9045	9.33507	6.82086	11.8493	9.7855	7.25627	12.3147
-94	10.6867	7.8672	13.5062	7.9414	5.3065	10.5763	9.78579	7.27835	12.2932	9.49282	6.99033	11.9953
-93	10.5879	7.76539	13.4105	7.80588	5.1902	10.4216	10.261	7.75646	12.7655	9.1962	6.6944	11.698
-92	10.3298	7.51251	13.1471	7.7052	5.09118	10.3192	10.7123	8.21038	13.2142	8.95418	6.44226	11.4661
-91	9.98899	7.1764	12.8016	7.70353	5.08165	10.3254	10.9914	8.48809	13.4947	8.90161	6.3842	11.419
-90	9.66716	6.84942	12.4849	7.84506	5.22022	10.4699	10.9502	8.44024	13.4602	8.95475	6.44516	11.4643
-89	9.37007	6.54285	12.1973	8.0347	5.41739	10.652	10.5771	8.05586	13.0983	9.12842	6.63806	11.6188
-88	9.14128	6.30297	11.9796	8.32823	5.7252	10.9313	9.89533	7.35853	12.4321	9.4321	6.96077	11.9034
-87	8.98789	6.14941	11.8264	8.64333	6.04469	11.242	8.96361	6.41472	11.5125	9.80756	7.33845	12.2767
-86	8.92671	6.10411	11.7493	9.01964	6.4034	11.6359	7.91308	5.36038	10.4658	10.0594	7.56975	12.5491
-85	8.86772	6.07053	11.6649	9.45802	6.80656	12.1095	6.97822	4.43186	9.52458	10.1695	7.64559	12.6935
-84	8.82861	6.05298	11.6043	9.94664	7.25888	12.6344	6.20731	3.6743	8.74033	10.1178	7.55808	12.6775
-83	8.75814	5.9937	11.5226	10.5086	7.80354	13.2137	5.7336	3.21176	8.25544	9.81922	7.23486	12.4036
-82	8.5001	5.73035	11.2698	11.0889	8.38484	13.793	5.57746	3.06081	8.0941	9.30506	6.71463	11.8955
-81	8.10096	5.31319	10.8887	11.6147	8.92197	14.3075	5.6961	3.17502	8.21718	8.70183	6.12487	11.2788
-80	7.62684	4.81972	10.434	12.01	9.32611	14.6938	5.97504	3.43997	8.51011	8.06975	5.521	10.6185
-79	7.13303	4.31573	9.95034	12.2456	9.55384	14.9374	6.35834	3.80794	8.90875	7.45064	4.92961	9.97166
-78	6.7001	3.88351	9.5167	12.2137	9.50091	14.9265	6.76494	4.20313	9.32675	7.07479	4.57321	9.57636
-77	6.51951	3.71808	9.32095	11.9458	9.21072	14.6809	7.207	4.64651	9.76749	6.94619	4.44807	9.44431
-76	6.61035	3.8306	9.39011	11.3878	8.63755	14.138	7.49658	4.95079	10.0424	7.09797	4.59101	9.60492
-75	6.98608	4.22617	9.746	10.7098	7.95816	13.4614	7.71405	5.19505	10.2331	7.48562	4.95878	10.0125
-74	7.61673	4.87638	10.3571	9.90399	7.16262	12.6454	7.96871	5.47894	10.4585	8.01903	5.46629	10.5718
-73	8.41656	5.69664	11.1365	9.0466	6.31937	11.7738	8.24435	5.7744	10.7143	8.56801	5.99078	11.1452
-72	9.13318	6.43255	11.8338	8.29388	5.57923	11.0085	8.54048	6.07558	11.0054	9.06983	6.47535	11.6643
-71	9.7005	7.00332	12.3977	7.71622	5.01656	10.4159	8.95286	6.4755	11.4302	9.39196	6.79447	11.9894
-70	9.85926	7.14401	12.5745	7.32213	4.63923	10.005	9.40936	6.90675	11.912	9.5394	6.95241	12.1264
-69	9.61163	6.86014	12.3631	7.12152	4.45112	9.79193	9.87619	7.34217	12.4102	9.47447	6.90886	12.0401
-68	8.96239	6.17349	11.7513	7.12163	4.45113	9.79213	10.2669	7.70674	12.8271	9.29667	6.75723	11.8361
-67	8.00968	5.19547	10.8239	7.25517	4.57058	9.93976	10.5161	7.939	13.0932	9.07054	6.55556	11.5855
-66	6.99026	4.17402	9.80649	7.4625	4.75822	10.1668	10.5608	7.97607	13.1454	8.87519	6.37827	11.3721
-65	6.01512	3.21381	8.81643	7.73201	5.01278	10.4512	10.4261	7.84198	13.0103	8.7762	6.28456	11.2679
-64	5.37728	2.59359	8.16096	8.08782	5.36908	10.8066	10.0711	7.49002	12.6522	8.77901	6.28024	11.2778
-63	5.20989	2.43143	7.98835	8.41884	5.72398	11.1137	9.53801	6.95782	12.1182	8.86421	6.34586	11.3826
-62	5.55231	2.76174	8.34289	8.70047	6.04486	11.3561	8.90547	6.32208	11.4889	8.9982	6.45749	11.5389
-61	6.29346	3.49132	9.0956	8.96133	6.34474	11.5779	8.21578	5.6261	10.8055	9.12669	6.5731	11.6803
-60	7.35852	4.55949	10.1575	9.17076	6.58703	11.7545	7.55716	4.96261	10.1517	9.10531	6.55815	11.6525
-59	8.54791	5.76627	11.3295	9.36784	6.80317	11.9325	6.98825	4.39768	9.57882	8.95134	6.42808	11.4746
-58	9.63037	6.87721	12.3835	9.4205	6.86478	11.9762	6.5652	3.99104	9.13935	8.71421	6.22269	11.2057
-57	10.4554	7.72741	13.1834	9.29509	6.73314	11.8571	6.37948	3.83042	8.92854	8.34491	5.8677	10.8221
-56	10.8786	8.15996	13.5972	8.9928	6.4118	11.5738	6.42601	3.89944	8.95258	7.96198	5.4726	10.4514
-55	10.8861	8.16068	13.6114	8.60387	5.99462	11.2131	6.69273	4.1793	9.20616	7.68473	5.16537	10.2041
-54	10.5375	7.79555	13.2794	8.10644	5.46346	10.7494	7.2142	4.69837	9.73003	7.51644	4.96353	10.0693
-53	9.8479	7.0849	12.6109	7.626	4.95689	10.2951	7.902	5.37536	10.4286	7.60969	5.04297	10.1764
-52	9.04351	6.25972	11.8273	7.19874	4.52134	9.87613	8.65759	6.11921	11.196	7.90177	5.34888	10.4547
-51	8.27154	5.47737	11.0657	6.89998	4.23554	9.56443	9.37416	6.8283	11.92	8.35654	5.82911	10.884
-50	7.72802	4.9282	10.5278	6.82815	4.18275	9.47354	9.96282	7.41258	12.5131	8.82428	6.31062	11.3379
-49	7.4605	4.65314	10.2679	6.96635	4.32441	9.60829	10.3409	7.78449	12.8972	9.29052	6.76566	11.8154
-48	7.53667	4.71913	10.3542	7.30856	4.64115	9.97597	10.5287	7.96632	13.091	9.62372	7.06615	12.1813
-47	7.90534	5.07764	10.733	7.79155	5.08045	10.5026	10.4434	7.87999	13.0069	9.73986	7.14767	12.332
-46	8.51728	5.68013	11.3544	8.35633	5.60342	11.1092	10.1379	7.58618	12.6896	9.64687	7.03593	12.2578
-45	9.25193	6.41788	12.086	8.8616	6.09578	11.6274	9.82238	7.29606	12.3487	9.39858	6.79455	12.0026
-44	9.93936	7.11539	12.7633	9.20054	6.45943	11.9417	9.55811	7.06288	12.0533	8.99907	6.42428	11.5739
-43	10.4038	7.59704	13.2106	9.32681	6.63552	12.0181	9.35636	6.88388	11.8288	8.61089	6.06979	11.152
-42	10.6652	7.87467	13.4557	9.16866	6.52827	11.809	9.35812	6.88649	11.8297	8.25677	5.74036	10.7732
-41	10.6139	7.83955	13.3882	8.79272	6.17956	11.4059	9.50062	7.00624	11.995	8.04216	5.53534	10.549
-40	10.2934	7.53729	13.0495	8.34867	5.73325	10.9641	9.73904	7.20756	12.2705	7.97154	5.45635	10.4867
-39	9.72287	6.99072	12.455	7.9129	5.28292	10.5429	9.9375	7.37809	12.4969	8.03479	5.50724	10.5623
-38	9.03983	6.33236	11.7473	7.58456	4.94593	10.2232	10.0368	7.4726	12.601	8.18433	5.64923	10.7194
-37	8.36293	5.67377	11.0521	7.41369	4.77803	10.0494	9.94939	7.41126	12.4875	8.40929	5.87502	10.9436
-36	7.6815	4.98846	10.3745	7.44478	4.81566	10.0739	9.63603	7.14336	12.1287	8.59089	6.07025	11.1115
-35	7.11583	4.39223	9.83944	7.76197	5.12595	10.398	9.18384	6.73438	11.6333	8.71761	6.2112	11.224
-34	6.66581	3.8927	9.43891	8.23721	5.56849	10.9059	8.6276	6.20438	11.0508	8.80822	6.30637	11.3101
-33	6.41534	3.59463	9.23605	8.7587	6.04282	11.4746	8.08079	5.65875	10.5028	8.84998	6.33626	11.3637
-32	6.21146	3.36203	9.06089	9.21229	6.45255	11.972	7.60219	5.16351	10.0409	8.85974	6.32248	11.397
-31	6.17756	3.33424	9.02088	9.51762	6.74101	12.2942	7.28733	4.82478	9.74987	8.85798	6.30063	11.4153
-30	6.24383	3.4404	9.04725	9.628	6.86621	12.3898	7.14674	4.67037	9.6231	8.81648	6.25006	11.3829
-29	6.41949	3.67517	9.1638	9.43654	6.7176	12.1555	7.15416	4.67876	9.62956	8.81054	6.2434	11.3777
-28	6.66918	3.97513	9.36324	9.03023	6.3622	11.6983	7.35216	4.88832	9.816	8.81868	6.25622	11.3811
-27	6.97843	4.31171	9.64515	8.51456	5.88977	11.1393	7.55846	5.10448	10.0124	8.81768	6.25668	11.3787
-26	7.36992	4.69916	10.0407	8.00974	5.40852	10.611	7.72204	5.2759	10.1682	8.80225	6.23716	11.3673
-25	7.78609	5.08213	10.4901	7.56365	4.96056	10.1667	7.89727	5.45795	10.3366	8.70552	6.13922	11.2718
-24	8.07383	5.31916	10.8285	7.26833	4.64131	9.89535	8.02993	5.59628	10.4636	8.6005	6.0317	11.1693
-23	8.29035	5.48186	11.0988	7.1128	4.45139	9.77422	8.04269	5.613	10.4724	8.34318	5.77838	10.908
-22	8.33559	5.48022	11.191	7.16252	4.47145	9.85358	7.99171	5.56422	10.4192	8.07517	5.52616	10.6242
-21	8.21043	5.33072	11.0901	7.4252	4.71691	10.1335	7.89846	5.46367	10.3333	7.76641	5.23671	10.2961
-20	7.89401	5.01471	10.7733	7.79037	5.08067	10.5001	7.7704	5.31651	10.2243	7.45372	4.94344	9.96399
-19	7.48012	4.61896	10.3413	8.16929	5.47192	10.8667	7.65762	5.17693	10.1383	7.18886	4.69233	9.68539
-18	7.02348	4.18697	9.85999	8.50845	5.82807	11.1888	7.522	5.01926	10.0247	7.02917	4.52666	9.53169
-17	6.51869	3.70111	9.33627	8.69708	6.02301	11.3711	7.36532	4.8472	9.88344	6.94225	4.40822	9.47628
-16	6.05791	3.24546	8.87035	8.78613	6.10771	11.4645	7.27069	4.74702	9.79435	6.93614	4.35715	9.51513
-15	5.70027	2.88696	8.51359	8.73281	6.03861	11.427	7.23311	4.70528	9.76095	6.94549	4.32373	9.56725
-14	5.42917	2.61812	8.24022	8.57037	5.86167	11.2791	7.29254	4.75462	9.83045	6.97684	4.32921	9.62446
-13	5.28612	2.48211	8.09013	8.28732	5.58207	10.9926	7.50496	4.94581	10.0641	6.98562	4.34261	9.62863
-12	5.26889	2.49059	8.04718	7.99428	5.31224	10.6763	7.88094	5.30204	10.4598	6.99112	4.38464	9.59759
-11	5.35358	2.60538	8.10179	7.85012	5.20204	10.4982	8.32784	5.74163	10.914	6.97796	4.42407	9.53185
-10	5.48748	2.77442	8.20053	7.9307	5.3175	10.5439	8.73207	6.15518	11.309	6.96804	4.4671	9.46899
-9	5.75638	3.07837	8.43439	8.15853	5.56587	10.7512	9.04407	6.49053	11.5976	7.01332	4.54745	9.47919
-8	6.13842	3.49056	8.78628	8.58161	5.99282	11.1704	9.25055	6.72442	11.7767	7.19344	4.73498	9.65191
-7	6.57202	3.94068	9.20336	9.10409	6.50886	11.6993	9.16963	6.666	11.6733	7.5451	5.06361	10.0266
-6	7.11109	4.4809	9.74128	9.72968	7.11825	12.3411	8.88721	6.39484	11.3796	8.07557	5.55453	10.5966
-5	7.64565	4.99602	10.2953	10.2317	7.59552	12.8679	8.39555	5.90086	10.8902	8.78311	6.22035	11.3459
-4	8.18533	5.50067	10.87	10.5426	7.88449	13.2006	7.79574	5.29132	10.3002	9.53775	6.9564	12.1191
-3	8.57418	5.85566	11.2927	10.6201	7.94577	13.2945	7.19127	4.67386	9.70868	10.3057	7.74037	12.871
-2	8.8983	6.1574	11.6392	10.3887	7.71037	13.0671	6.74382	4.21331	9.27433	10.9163	8.39233	13.4403
-1	9.08069	6.33504	11.8263	9.93682	7.2665	12.6071	6.5297	3.98826	9.07114	11.2455	8.77422	13.7167
0	9.12698	6.39214	11.8618	9.29235	6.63908	11.9456	6.54929	4.00159	9.097	11.2501	8.81728	13.6829
1	9.03183	6.30507	11.7586	8.58363	5.94841	11.2188	6.84915	4.29805	9.40024	10.9533	8.52451	13.3822
2	8.87894	6.14974	11.6082	7.90329	5.28185	10.5247	7.36189	4.81435	9.90942	10.3759	7.9187	12.833
3	8.74671	6.00914	11.4843	7.28343	4.66726	9.8996	7.97074	5.43289	10.5086	9.64952	7.15054	12.1485
4	8.59469	5.85163	11.3377	6.8466	4.22791	9.4653	8.56887	6.04152	11.0962	8.84325	6.31108	11.3754
5	8.42434	5.68597	11.1627	6.56239	3.93305	9.19173	9.09397	6.57363	11.6143	8.20341	5.65779	10.749
6	8.24174	5.51495	10.9685	6.45002	3.79998	9.10005	9.37759	6.86592	11.8893	7.73566	5.1976	10.2737
7	8.01287	5.28851	10.7372	6.49287	3.81838	9.16736	9.48824	6.98504	11.9914	7.58299	5.05743	10.1085
8	7.78342	5.04424	10.5226	6.66703	3.97184	9.36221	9.39024	6.90104	11.8794	7.71118	5.18935	10.233
9	7.46504	4.69683	10.2333	6.96234	4.25992	9.66475	9.21001	6.73843	11.6816	8.05331	5.5266	10.58
10	7.11254	4.31104	9.91405	7.25254	4.55923	9.94585	8.96327	6.51223	11.4143	8.54037	6.00843	11.0723
11	6.83235	4.01058	9.65412	7.61558	4.94233	10.2888	8.74397	6.30867	11.1793	9.01881	6.48768	11.5499
12	6.59657	3.77772	9.41541	7.96383	5.31382	10.6138	8.6021	6.16757	11.0366	9.33847	6.81622	11.8607
13	6.42939	3.6317	9.22707	8.35655	5.71908	10.994	8.5745	6.12224	11.0267	9.46809	6.95664	11.9795
14	6.47684	3.70955	9.24413	8.72404	6.08528	11.3628	8.68598	6.20366	11.1683	9.37028	6.85959	11.881
15	6.71062	3.97225	9.44899	9.05466	6.4021	11.7072	8.99056	6.47629	11.5048	9.11049	6.58657	11.6344
16	7.09921	4.37748	9.82094	9.26831	6.59963	11.937	9.37513	6.83802	11.9122	8.71032	6.16769	11.2529
17	7.56438	4.84661	10.2821	9.32085	6.64343	11.9983	9.78122	7.23654	12.3259	8.2971	5.74348	10.8507
18	8.04916	5.32599	10.7723	9.24777	6.57567	11.9199	10.0888	7.55015	12.6274	7.8947	5.34647	10.4429
19	8.38162	5.64874	11.1145	9.1626	6.50983	11.8154	10.2397	7.71069	12.7687	7.60334	5.08265	10.124
20	8.48253	5.74407	11.221	9.03166	6.40904	11.6543	10.2588	7.73403	12.7836	7.48022	4.997	9.96345
21	8.40266	5.66	11.1453	8.93942	6.34897	11.5299	10.1641	7.62914	12.6991	7.46796	5.01687	9.91905
22	8.10459	5.36337	10.8458	8.95012	6.38317	11.5171	9.95527	7.3996	12.5109	7.56718	5.12929	10.0051
23	7.70383	4.96956	10.4381	9.16427	6.60116	11.7274	9.67727	7.10366	12.2509	7.65724	5.20741	10.1071
24	7.30348	4.57681	10.0301	9.53534	6.9544	12.1163	9.4178	6.84555	11.99	7.74492	5.26362	10.2262
25	6.99852	4.27766	9.71938	9.99301	7.38092	12.6051	9.15253	6.60934	11.6957	7.66641	5.15276	10.1801
26	6.87548	4.15124	9.59971	10.5353	7.89617	13.1744	8.90317	6.40924	11.3971	7.51471	4.98308	10.0463
27	7.03018	4.29416	9.7662	10.9435	8.29486	13.5922	8.69009	6.24113	11.1391	7.34335	4.81457	9.87212
28	7.41378	4.65807	10.1695	11.2624	8.62561	13.8992	8.62624	6.18803	11.0645	7.13918	4.63649	9.64188
29	7.93511	5.15306	10.7172	11.3552	8.73973	13.9707	8.59531	6.12377	11.0668	6.95733	4.49305	9.4216
30	8.46323	5.65291	11.2736	11.1682	8.57323	13.7632	8.60172	6.06899	11.1345	6.96375	4.52818	9.39933
31	8.96872	6.13123	11.8062	10.7298	8.13795	13.3216	8.67304	6.08366	11.2624	7.17982	4.75849	9.60114
32	9.41606	6.55515	12.277	10.103	7.49293	12.713	8.80295	6.19066	11.4153	7.60851	5.18218	10.0348
33	9.69874	6.82745	12.57	9.45309	6.81263	12.0936	8.89024	6.29531	11.4852	8.16161	5.72013	10.6031
34	9.86433	6.99802	12.7306	8.75741	6.08966	11.4252	8.94261	6.39458	11.4906	8.87319	6.42286	11.3235
35	9.97654	7.13193	12.8211	8.12893	5.45052	10.8073	8.87938	6.38579	11.373	9.62578	7.17442	12.0771
36	10.0675	7.24847	12.8866	7.71992	5.05669	10.3832	8.78221	6.32834	11.2361	10.2809	7.83124	12.7306
37	10.2323	7.43808	13.0265	7.42465	4.79332	10.056	8.56744	6.12474	11.0101	10.7552	8.29996	13.2105
38	10.4451	7.66259	13.2276	7.36249	4.76446	9.96051	8.27448	5.82248	10.7265	11.0057	8.53138	13.4801
39	10.5973	7.81049	13.3842	7.4088	4.82931	9.98829	7.85798	5.39393	10.322	11.0711	8.56555	13.5766
40	10.6467	7.84609	13.4473	7.55658	4.97032	10.1428	7.46255	4.98784	9.93727	10.9183	8.3769	13.4597
41	10.5425	7.72762	13.3574	7.74718	5.13002	10.3643	7.12263	4.63893	9.60632	10.5551	7.99332	13.1168
42	10.1785	7.36209	12.9949	7.9069	5.2451	10.5687	6.93482	4.44173	9.4279	10.0788	7.51752	12.6401
43	9.59756	6.79716	12.398	7.94016	5.23529	10.645	7.04133	4.53557	9.5471	9.50888	6.96902	12.0487
44	8.79198	6.01437	11.5696	7.8596	5.1286	10.5906	7.4872	4.96921	10.0052	8.93388	6.42603	11.4417
45	7.95112	5.1918	10.7105	7.69862	4.96704	10.4302	8.19854	5.67085	10.7262	8.37212	5.89181	10.8524
46	7.15551	4.39443	9.9166	7.41171	4.70441	10.119	9.04643	6.51812	11.5747	7.91504	5.44233	10.3877
47	6.61807	3.83081	9.40534	7.02152	4.35643	9.68662	9.96113	7.43621	12.4861	7.59298	5.1055	10.0805
48	6.29632	3.46858	9.12406	6.70318	4.07935	9.32701	10.8011	8.27734	13.3248	7.48492	4.96988	9.99996
49	6.20175	3.34309	9.0604	6.50737	3.90411	9.11062	11.4365	8.90582	13.9671	7.72566	5.17942	10.2719
50	6.33196	3.4701	9.19382	6.39592	3.78888	9.00295	11.7154	9.1728	14.258	8.26629	5.70304	10.8295
51	6.54477	3.70876	9.38077	6.46048	3.82443	9.09653	11.676	9.11726	14.2348	9.08581	6.52992	11.6417
52	6.60894	3.81294	9.40494	6.72443	4.04662	9.40225	11.2851	8.71173	13.8586	10.0673	7.53787	12.5967
53	6.41018	3.64769	9.17268	7.14434	4.42779	9.86089	10.6779	8.09433	13.2615	11.1337	8.64341	13.624
54	5.77134	3.0293	8.51337	7.63215	4.89167	10.3726	9.92126	7.33893	12.5036	12.1005	9.6356	14.5655
55	4.72921	1.99193	7.46649	8.21827	5.4748	10.9617	9.21265	6.6392	11.7861	12.8193	10.3534	15.2852
56	3.43952	0.706106	6.17293	8.77851	6.04525	11.5118	8.64233	6.08124	11.2034	13.1837	10.6913	15.676
57	2.05431	-0.668872	4.77749	9.32816	6.6106	12.0457	8.40047	5.84992	10.951	13.0461	10.5155	15.5768
58	0.797647	-1.91218	3.50748	9.83624	7.12572	12.5468	8.48956	5.93858	11.0405	12.4523	9.88141	15.0231
59	-0.117674	-2.82102	2.58567	10.2526	7.52875	12.9764	8.8507	6.28916	11.4122	11.4876	8.89363	14.0817
60	-0.464056	-3.17398	2.24586	10.6736	7.92502	13.4223	9.51757	6.94256	12.0926	10.3838	7.78063	12.987
61	-0.0883199	-2.8203	2.64366	11.1735	8.39449	13.9526	10.4792	7.90055	13.0578	9.26201	6.66049	11.8635
62	1.01427	-1.75041	3.77896	11.8021	9.00105	14.6032	11.6232	9.05644	14.19	8.34048	5.74909	10.9319
63	2.83082	0.0329883	5.62865	12.5722	9.76395	15.3804	12.9788	10.4409	15.5166	7.81303	5.2412	10.3849
64	5.14941	2.32383	7.97498	13.4542	10.6574	16.251	14.3273	11.8229	16.8318	7.70745	5.16371	10.2512
65	7.79914	4.9525	10.6458	14.452	11.6767	17.2272	15.6485	13.1646	18.1323	8.0897	5.5825	10.5969
66	10.4234	7.56916	13.2775	15.3532	12.6016	18.1047	16.7584	14.2741	19.2426	8.82582	6.34981	11.3018
67	12.7893	9.95025	15.6284	16.0428	13.3124	18.7731	17.4321	14.93	19.9341	9.82813	7.36624	12.29
68	14.5834	11.7819	17.385	16.3828	13.6725	19.0931	17.5347	15.0064	20.063	10.8929	8.42729	13.3586
69	15.6268	12.8744	18.3793	16.2224	13.5337	18.9111	17.0188	14.4797	19.558	11.8373	9.34848	14.3262
70	15.7432	13.0377	18.4488	15.461	12.8035	18.1186	15.7827	13.2552	18.3103	12.4708	9.95438	14.9872
71	14.9809	12.3121	17.6497	14.1631	11.5437	16.7825	13.9038	11.407	16.4006	12.6353	10.1041	15.1666
72	13.3659	10.7085	16.0233	12.439	9.86136	15.0167	11.6018	9.13728	14.0663	12.3419	9.81708	14.8668
73	11.0804	8.41412	13.7466	10.4973	7.9576	13.0369	9.12898	6.68051	11.5774	11.6785	9.1802	14.1769
74	8.50223	5.81729	11.1872	8.551	6.03898	11.063	6.74359	4.28468	9.2025	10.7586	8.29689	13.2202
75	5.85715	3.15542	8.55888	6.83235	4.33718	9.32753	4.72495	2.23215	7.21775	9.74962	7.31912	12.1801
76	3.51392	0.799336	6.2285	5.47544	2.9842	7.96669	3.41516	0.883646	5.94668	8.83436	6.4149	11.2538
77	1.68664	-1.04115	4.41444	4.72713	2.23143	7.22282	2.96841	0.412097	5.52472	8.16885	5.73168	10.606
78	0.558409	-2.17964	3.29646	4.6216	2.11649	7.12672	3.4118	0.854032	5.96956	7.95386	5.48139	10.4263
79	0.204453	-2.54097	2.94987	5.07216	2.55709	7.58724	4.67652	2.13076	7.22228	8.22182	5.71895	10.7247
80	0.622711	-2.12815	3.37357	6.04977	3.52307	8.57648	6.56995	4.03366	9.10624	9.02984	6.51638	11.5433
81	1.62872	-1.11767	4.3751	7.4517	4.91005	9.99335	8.77588	6.24134	11.3104	10.2552	7.75583	12.7545
82	3.05245	0.316818	5.78808	9.05885	6.49597	11.6217	11.0666	8.52484	13.6083	11.7576	9.28206	14.233
83	4.69706	1.97447	7.41965	10.7149	8.12927	13.3005	13.1819	10.63	15.7337	13.2891	10.8275	15.7506
84	6.35092	3.63416	9.06767	12.2634	9.66037	14.8663	14.9724	12.4118	17.533	14.653	12.1791	17.127
85	7.93131	5.20487	10.6578	13.6473	11.0316	16.263	16.3008	13.7304	18.8712	15.5898	13.0812	18.0984
86	9.3421	6.59191	12.0923	14.7787	12.1554	17.4021	17.1708	14.5825	19.7592	15.9261	13.3771	18.4751
87	10.5482	7.77104	13.3254	15.6085	12.9804	18.2366	17.6583	15.0448	20.2718	15.6823	13.1092	18.2555
88	11.5071	8.71219	14.3021	16.1231	13.4923	18.7539	17.8313	15.2023	20.4603	14.8949	12.3306	17.4591
89	12.2544	9.45965	15.0491	16.4292	13.7967	19.0616	17.8472	15.2205	20.4739	13.7277	11.2015	16.2539
90	12.7802	10.0045	15.556	16.6142	13.9803	19.2481	17.8697	15.2806	20.4587	12.4165	9.94357	14.8895
91	13.1045	10.3573	15.8517	16.6611	14.0383	19.284	17.8575	15.3387	20.3764	11.2116	8.78394	13.6393
92	13.2493	10.5306	15.9681	16.6751	14.0764	19.2738	17.956	15.52	20.392	10.3157	7.90623	12.7252
93	13.1497	10.4435	15.8559	16.7373	14.172	19.3026	18.0867	15.7186	20.4548	9.88705	7.46569	12.3084
94	12.8896	10.1742	15.605	16.8819	14.3473	19.4165	18.3008	15.9616	20.64	10.065	7.61475	12.5153
95	12.4191	9.67962	15.1587	17.1211	14.6025	19.6396	18.5475	16.1906	20.9044	10.7348	8.2563	13.2133
96	11.8986	9.12566	14.6716	17.4657	14.9406	19.9909	18.8051	16.4002	21.2101	11.8656	9.3719	14.3592
97	11.4185	8.61538	14.2216	17.8914	15.3448	20.4379	19.043	16.5796	21.5064	13.244	10.7513	15.7366
98	11.1002	8.27211	13.9283	18.4098	15.8407	20.9788	19.3109	16.8031	21.8187	14.7809	12.2969	17.2648
99	10.9372	8.09182	13.7826	18.9802	16.4059	21.5545	19.5333	17.0126	22.054	16.3026	13.8307	18.7745
100	11.0932	8.23794	13.9484	19.6004	17.0337	22.1671	19.7437	17.2417	22.2457	17.6402	15.1729	20.1074
101	11.5453	8.6937	14.397	20.4059	17.859	22.9528	20.0072	17.5483	22.466	18.7632	16.296	21.2303
102	12.2832	9.45256	15.1138	21.3555	18.8293	23.8818	20.3698	17.9615	22.7781	19.6906	17.2204	22.1608
103	13.3782	10.5844	16.1719	22.4381	19.9193	24.9568	20.857	18.4902	23.2239	20.4296	17.9517	22.9076
104	14.7833	12.0352	17.5313	23.6935	21.1631	26.2238	21.4582	19.1138	23.8025	21.0333	18.5453	23.5213
105	16.3865	13.678	19.095	25.1136	22.5638	27.6634	22.185	19.8412	24.5288	21.5213	19.0193	24.0234
106	18.1718	15.4733	20.8704	26.7409	24.1675	29.3144	22.9606	20.5997	25.3215	21.9506	19.4321	24.469
107	20.0587	17.3384	22.7791	28.4126	25.8175	31.0078	23.6809	21.2924	26.0694	22.3612	19.827	24.8954
108	21.9386	19.1739	24.7033	30.0968	27.4846	32.709	24.3058	21.8877	26.7238	22.8043	20.2512	25.3574
109	23.6588	20.8503	26.4673	31.6525	29.0343	34.2707	24.6845	22.2388	27.1303	23.2984	20.7249	25.8719
110	25.0858	22.254	27.9176	32.9543	30.3331	35.5756	24.7511	22.2904	27.2119	23.8587	21.2705	26.447
111	26.1151	23.2896	28.9405	33.9135	31.3004	36.5265	24.5157	22.0464	26.9851	24.3888	21.7972	26.9805
112	26.741	23.9446	29.5373	34.4566	31.8584	37.0549	23.9885	21.5165	26.4605	24.9436	22.3675	27.5197
113	26.9032	24.1442	29.6623	34.5708	31.9905	37.1512	23.3435	20.8692	25.8177	25.5303	22.9934	28.0672
114	26.6681	23.9368	29.3994	34.2644	31.6969	36.8319	22.6961	20.2161	25.176	26.0783	23.6011	28.5554
115	26.1889	23.4689	28.909	33.6068	31.0437	36.1699	22.2447	19.7566	24.7328	26.6185	24.1983	29.0388
116	25.6505	22.9307	28.3702	32.7089	30.1346	35.2833	22.1433	19.642	24.6446	27.0864	24.7015	29.4712
117	25.1587	22.4389	27.8786	31.6511	29.054	34.2481	22.4551	19.9447	24.9655	27.4896	25.1039	29.8753
118	24.8465	22.1254	27.5676	30.5458	27.9222	33.1693	23.1903	20.6758	25.7048	27.8178	25.4026	30.233
119	24.7732	22.0506	27.4957	29.49	26.8499	32.1301	24.243	21.7293	26.7568	28.0043	25.5474	30.4611
120	24.9809	22.2507	27.711	28.4898	25.8461	31.1334	25.4058	22.8971	27.9145	28.0727	25.582	30.5635
121	25.3727	22.6235	28.1219	27.5383	24.9022	30.1744	26.4396	23.9374	28.9417	27.9369	25.4375	30.4363
122	25.7915	23.0176	28.5655	26.6491	24.0241	29.2742	27.1762	24.6791	29.6733	27.5959	25.1107	30.0811
123	26.1497	23.3604	28.939	25.7922	23.1683	28.4161	27.4082	24.9129	29.9036	27.0711	24.6101	29.5321
124	26.2939	23.512	29.0758	24.8969	22.2662	27.5276	27.0765	24.5859	29.5671	26.2413	23.8018	28.6809
125	26.1479	23.4064	28.8894	23.9426	21.299	26.5863	26.2514	23.7659	28.737	25.1692	22.7389	27.5995
126	25.6857	23.0025	28.3689	22.8234	20.1717	25.4751	25.0696	22.5905	27.5487	23.8133	21.378	26.2486
127	24.8946	22.2614	27.5278	21.5892	18.9396	24.2388	23.7435	21.2621	26.225	22.2889	19.8471	24.7307
128	23.8323	21.2147	26.4499	20.333	17.6988	22.9672	22.4511	19.9591	24.9431	20.6475	18.2045	23.0905
129	22.6521	20.0072	25.297	19.0015	16.3781	21.6248	21.3965	18.8899	23.9031	19.0421	16.6046	21.4796
130	21.506	18.8171	24.195	17.7774	15.1537	20.4012	20.7787	18.2557	23.3017	17.5644	15.1363	19.9925
131	20.4151	17.6879	23.1423	16.5909	13.9582	19.2235	20.5321	17.9935	23.0706	16.3585	13.9317	18.7852
132	19.5163	16.7792	22.2533	15.562	12.9154	18.2086	20.5742	18.0233	23.1251	15.5703	13.1336	18.007
133	18.8728	16.1542	21.5915	14.6701	12.017	17.3232	20.705	18.1526	23.2573	15.2398	12.7867	17.6929
134	18.5146	15.8263	21.2029	13.8646	11.2237	16.5055	20.8234	18.2797	23.367	15.2437	12.7708	17.7165
135	18.3639	15.7007	21.0271	13.2211	10.6114	15.8308	20.7687	18.2431	23.2942	15.4857	12.9982	17.9731
136	18.3977	15.7404	21.055	12.6174	10.0485	15.1863	20.5194	18.0229	23.016	15.8289	13.3342	18.3235
137	18.5129	15.8468	21.179	12.131	9.59701	14.665	20.0729	17.6084	22.5374	16.2088	13.7159	18.7017
138	18.4975	15.8166	21.1783	11.7559	9.24325	14.2685	19.4942	17.0559	21.9324	16.3082	13.8206	18.7958
139	18.3393	15.6471	21.0314	11.5105	8.99848	14.0224	18.9207	16.4994	21.342	16.1321	13.6498	18.6144
140	18.0015	15.3051	20.6978	11.4396	8.91954	13.9597	18.4585	16.0401	20.8768	15.6188	13.1417	18.096
141	17.484	14.7807	20.1873	11.5844	9.06001	14.1087	18.2085	15.7816	20.6355	14.8815	12.4095	17.3535
142	16.8134	14.0972	19.5296	11.9839	9.4659	14.5019	18.2495	15.8092	20.6898	14.0593	11.5934	16.5252
143	16.1243	13.3901	18.8585	12.5709	10.0724	15.0694	18.5512	16.0952	21.0072	13.1875	10.7326	15.6423
144	15.4687	12.7128	18.2246	13.2188	10.7353	15.7023	18.9768	16.5055	21.448	12.4663	10.0211	14.9115
145	14.9981	12.2208	17.7754	13.9154	11.4297	16.4011	19.469	16.9847	21.9533	11.9484	9.50774	14.389
146	14.8152	12.0204	17.61	14.6092	12.1009	17.1175	19.8934	17.3998	22.387	11.6531	9.20676	14.0995
147	14.8241	12.0259	17.6223	15.2287	12.6811	17.7762	20.1625	17.6661	22.6589	11.6097	9.14084	14.0785
148	15.0187	12.2343	17.803	15.6892	13.1058	18.2726	20.1957	17.7054	22.686	11.6346	9.13243	14.1367
149	15.3451	12.5831	18.107	15.958	13.3557	18.5603	20.0315	17.5524	22.5106	11.7123	9.17832	14.2463
150	15.671	12.9316	18.4105	16.0412	13.4391	18.6432	19.7477	17.2828	22.2127	11.7546	9.19961	14.3095
151	15.9303	13.2005	18.6601	15.9767	13.3903	18.563	19.4229	16.9703	21.8755	11.6845	9.13276	14.2362
152	16.0457	13.3122	18.7791	15.7447	13.1753	18.3141	19.0298	16.5824	21.4773	11.5438	9.01311	14.0744
153	15.9932	13.2492	18.7372	15.4523	12.8897	18.0149	18.6568	16.203	21.1105	11.3502	8.84575	13.8546
154	15.7734	13.0313	18.5155	15.0688	12.4973	17.6402	18.3162	15.8516	20.7808	11.1255	8.63873	13.6122
155	15.3444	12.6201	18.0686	14.5957	12.0015	17.1899	17.9849	15.5033	20.4665	10.9745	8.49653	13.4524
156	14.7821	12.0811	17.483	14.1224	11.505	16.7398	17.5938	15.1028	20.0847	10.9	8.42949	13.3705
157	14.0995	11.406	16.793	13.6783	11.0394	16.3171	17.0775	14.58	19.5749	10.8802	8.4198	13.3405
158	13.2967	10.5739	16.0195	13.2137	10.5599	15.8674	16.3903	13.8909	18.8897	10.9188	8.47591	13.3618
159	12.5042	9.71923	15.2892	12.7735	10.1156	15.4315	15.6231	13.1293	18.117	10.9854	8.55647	13.4144
160	11.6721	8.81864	14.5255	12.3477	9.6992	14.9963	14.7857	12.3037	17.2677	11.0106	8.57685	13.4444
161	10.8444	7.94015	13.7486	11.9066	9.28075	14.5324	13.9159	11.4482	16.3836	10.9638	8.50632	13.4213
162	10.1064	7.20187	13.0108	11.4634	8.87036	14.0564	13.0146	10.5636	15.4655	10.8625	8.36687	13.3581
163	9.60202	6.74201	12.462	11.0237	8.45931	13.588	12.2449	9.8033	14.6866	10.6348	8.1027	13.1668
164	9.31395	6.52265	12.1053	10.6025	8.05907	13.1459	11.6252	9.17675	14.0736	10.3479	7.79733	12.8984
165	9.33109	6.60014	12.062	10.188	7.65454	12.7216	11.1529	8.68198	13.6238	10.0508	7.50358	12.5981
166	9.64522	6.93553	12.3549	9.80344	7.26518	12.3417	10.7615	8.26211	13.2609	9.7722	7.23833	12.3061
167	10.1055	7.37011	12.8409	9.48097	6.93667	12.0253	10.3935	7.86597	12.921	9.49944	6.97994	12.019
168	10.6947	7.90974	13.4796	9.25322	6.70168	11.8048	9.99604	7.44623	12.5459	9.20023	6.6846	11.7159
169	11.2534	8.43036	14.0765	9.20303	6.64249	11.7636	9.53043	6.96994	12.0909	8.86422	6.33814	11.3903
170	11.5994	8.77731	14.4216	9.34898	6.77956	11.9184	9.00856	6.44736	11.5697	8.5041	5.96335	11.0448
171	11.6241	8.84094	14.4072	9.63975	7.0646	12.2149	8.42416	5.87189	10.9764	8.11939	5.5724	10.6664
172	11.3336	8.60853	14.0587	10.0157	7.43856	12.5929	7.81792	5.28403	10.3518	7.66103	5.12846	10.1936
173	10.7457	8.06478	13.4267	10.4175	7.8359	12.9992	7.20635	4.70093	9.71176	7.24197	4.74235	9.7416
174	9.87982	7.20524	12.5544	10.8332	8.24606	13.4204	6.6932	4.22155	9.16485	6.94551	4.48143	9.40958
175	9.01884	6.31168	11.726	11.1561	8.55561	13.7567	6.37579	3.93462	8.81696	6.85614	4.41796	9.29433
176	8.13809	5.37901	10.8972	11.3412	8.72311	13.9592	6.2613	3.84254	8.68006	7.03567	4.60314	9.46819
177	7.44477	4.64563	10.2439	11.3016	8.66638	13.9368	6.34623	3.93498	8.75749	7.40485	4.95932	9.85039
178	7.02862	4.22082	9.83643	11.1092	8.45842	13.7599	6.66879	4.25433	9.08325	8.02914	5.57047	10.4878
179	6.9182	4.12992	9.70648	10.7848	8.122	13.4475	7.20782	4.7808	9.63483	8.81488	6.35547	11.2743
180	7.12153	4.36189	9.88116	10.3823	7.70988	13.0548	7.81233	5.3778	10.2469	9.69209	7.24778	12.1364
181	7.58488	4.84526	10.3245	9.9016	7.22747	12.5757	8.3109	5.87636	10.7454	10.56	8.14121	12.9788
182	8.21359	5.48185	10.9453	9.54193	6.8704	12.2135	8.62313	6.20278	11.0435	11.3288	8.92875	13.7289
183	8.95228	6.21744	11.6871	9.23593	6.57643	11.8954	8.73685	6.3334	11.1403	11.8973	9.49716	14.2975
184	9.62615	6.89755	12.3547	9.04065	6.39547	11.6858	8.58145	6.18414	10.9788	12.3402	9.92323	14.7571
185	10.2419	7.53258	12.9512	9.02639	6.39161	11.6612	8.21329	5.80192	10.6247	12.6394	10.1903	15.0885
186	10.7194	8.04028	13.3984	9.19976	6.56945	11.8301	7.62463	5.17928	10.07	12.7997	10.3168	15.2826
187	11.0182	8.36481	13.6715	9.56265	6.92973	12.1956	6.96852	4.48242	9.45461	12.8526	10.343	15.3622
188	11.1322	8.48303	13.7813	10.0994	7.46083	12.7379	6.44412	3.92238	8.96585	12.8628	10.332	15.3935
189	11.1092	8.43972	13.7787	10.7621	8.11536	13.4089	6.10937	3.57035	8.64839	12.8475	10.3041	15.3909
190	10.9195	8.21527	13.6237	11.4194	8.76455	14.0743	6.02196	3.48314	8.56078	12.7486	10.2028	15.2944
191	10.6587	7.91525	13.4022	11.9547	9.29028	14.6191	6.22142	3.68406	8.75878	12.5417	10.0022	15.0813
192	10.3545	7.5927	13.1163	12.309	9.63399	14.984	6.773	4.22967	9.31633	12.2062	9.67635	14.7361
193	10.0353	7.27873	12.7918	12.3778	9.70393	15.0518	7.61544	5.05727	10.1736	11.7808	9.25785	14.3038
194	9.80505	7.0651	12.545	12.0988	9.43959	14.758	8.58815	6.00897	11.1673	11.2695	8.73968	13.7994
195	9.62532	6.90967	12.341	11.4558	8.82905	14.0826	9.58057	6.98452	12.1766	10.6516	8.09643	13.2068
196	9.50368	6.80449	12.2029	10.5875	8.00031	13.1746	10.5107	7.91145	13.1099	9.98413	7.39543	12.5728
197	9.48045	6.78665	12.1742	9.6173	7.06532	12.1693	11.2233	8.63564	13.8109	9.4176	6.80144	12.0338
198	9.50239	6.80663	12.1981	8.68892	6.15337	11.2245	11.6548	9.08901	14.2205	8.94999	6.32702	11.573
199	9.55802	6.85385	12.2622	7.99734	5.46142	10.5333	11.7662	9.23133	14.301	8.62503	6.01432	11.2357
200	9.54913	6.82813	12.2701	7.60323	5.05804	10.1484	11.5347	9.022	14.0474	8.50872	5.92651	11.0909
