# Supplementary material for: Rapid stimulus-driven modulation of slow ocular position drifts
Source: eLife. 2020 Aug 6;9:e57595. doi: 10.7554/eLife.57595 (PMC7442486; doi:10.7554/eLife.57595)
Supplement: Figure 4—source data 1. [file elife-57595-fig4-data1.xlsx]

## Sheet: Panel_A
time	mSaccRate_Control_Mean	mSaccRate_Control_95ci_low	mSaccRate_Control_95ci_up	mSaccRate_Right_Mean	mSaccRate_Right_95ci_low	mSaccRate_Right_95ci_up
-100	2.6626	2.25811	3.0671	2.81199	2.39744	3.22653
-95	2.70325	2.29653	3.10998	2.85304	2.43636	3.26971
-90	2.64228	2.23891	3.04564	2.79146	2.378	3.20493
-85	2.64228	2.23891	3.04564	2.66831	2.26151	3.07511
-80	2.72358	2.31575	3.13141	2.68883	2.2809	3.09677
-75	2.7439	2.33498	3.15282	2.66831	2.26151	3.07511
-70	2.78455	2.37347	3.19563	2.68883	2.2809	3.09677
-65	2.80488	2.39273	3.21703	2.60673	2.2034	3.01007
-60	2.9065	2.48916	3.32385	2.50411	2.10674	2.90147
-55	2.80488	2.39273	3.21703	2.48358	2.08745	2.87971
-50	2.72358	2.31575	3.13141	2.52463	2.12605	2.92321
-45	2.80488	2.39273	3.21703	2.54516	2.14538	2.94494
-40	2.76423	2.35422	3.17423	2.44253	2.04888	2.83618
-35	2.60163	2.20055	3.0027	2.48358	2.08745	2.87971
-30	2.56098	2.16223	2.95972	2.422	2.02961	2.8144
-25	2.64228	2.23891	3.04564	2.38095	1.99111	2.7708
-20	2.6626	2.25811	3.0671	2.38095	1.99111	2.7708
-15	2.52033	2.12395	2.9167	2.46305	2.06816	2.85795
-10	2.5813	2.18139	2.98121	2.44253	2.04888	2.83618
-5	2.5813	2.18139	2.98121	2.40148	2.01035	2.7926
0	2.54065	2.14309	2.93821	2.44253	2.04888	2.83618
5	2.5813	2.18139	2.98121	2.422	2.02961	2.8144
10	2.62195	2.21973	3.02417	2.46305	2.06816	2.85795
15	2.72358	2.31575	3.13141	2.56568	2.16471	2.96666
20	2.72358	2.31575	3.13141	2.64778	2.24213	3.05344
25	2.72358	2.31575	3.13141	2.62726	2.22276	3.03176
30	2.78455	2.37347	3.19563	2.75041	2.33521	3.16561
35	2.68293	2.27731	3.08854	2.66831	2.25755	3.07907
40	2.72358	2.31575	3.13141	2.66831	2.25755	3.07907
45	2.8252	2.412	3.23841	2.56568	2.16471	2.96666
50	2.80488	2.39273	3.21703	2.64778	2.24213	3.05344
55	2.7439	2.33498	3.15282	2.56568	2.16471	2.96666
60	2.62195	2.21973	3.02417	2.44253	2.04888	2.83618
65	2.68293	2.27731	3.08854	2.15517	1.78016	2.53019
70	2.64228	2.235	3.04955	2.0936	1.72288	2.46431
75	2.72358	2.31188	3.13528	2.03202	1.66571	2.39832
80	2.7439	2.33112	3.15669	1.80624	1.45718	2.1553
85	2.64228	2.23891	3.04564	1.64204	1.30667	1.9774
90	2.5	2.10483	2.89517	1.45731	1.1387	1.77592
95	2.3374	1.9522	2.7226	1.2931	0.990756	1.59545
100	2.35772	1.97124	2.74421	1.14943	0.862548	1.4363
105	2.39837	2.00935	2.78739	0.964696	0.69975	1.22964
110	2.43902	2.04751	2.83054	0.656814	0.4353	0.878329
115	2.5	2.10483	2.89517	0.595238	0.383815	0.806662
120	2.4187	2.02843	2.80897	0.431034	0.249884	0.612185
125	2.5	2.10483	2.89517	0.369458	0.201318	0.537598
130	2.52033	2.12395	2.9167	0.205255	0.0790853	0.331424
135	2.43902	2.04751	2.83054	0.102627	0.0130405	0.192214
140	2.39837	2.00935	2.78739	0.102627	0.0130405	0.192214
145	2.45935	2.06661	2.85209	0.0821018	0.00190671	0.162297
150	2.6626	2.25811	3.0671	0.0205255	-0.0196714	0.0607223
155	2.64228	2.23891	3.04564	0	0	0
160	2.5	2.10483	2.89517	0	0	0
165	2.54065	2.14309	2.93821	0	0	0
170	2.52033	2.12395	2.9167	0	0	0
175	2.4187	2.02843	2.80897	0.0205255	-0.0196714	0.0607223
180	2.39837	2.00935	2.78739	0.0205255	-0.0196714	0.0607223
185	2.45935	2.06661	2.85209	0.0205255	-0.0196714	0.0607223
190	2.35772	1.97124	2.74421	0.0205255	-0.0196714	0.0607223
195	2.35772	1.97124	2.74421	0.0205255	-0.0196714	0.0607223
200	2.35772	1.97124	2.74421	0.0205255	-0.0196714	0.0607223
205	2.15447	1.78134	2.52761	0.0410509	-0.0157492	0.0978511
210	2.15447	1.78134	2.52761	0.0615764	-0.00793201	0.131085
215	2.13415	1.76241	2.50588	0.0821018	0.00190671	0.162297
220	2.21545	1.83819	2.59271	0.0821018	0.00190671	0.162297
225	2.2561	1.87614	2.63605	0.102627	0.0130405	0.192214
230	2.05285	1.68683	2.41886	0.123153	0.0250967	0.221209
235	1.99187	1.63028	2.35346	0.164204	0.0511662	0.277241
240	2.11382	1.7435	2.48414	0.184729	0.0649345	0.304524
245	2.13415	1.76241	2.50588	0.22578	0.093563	0.357997
250	2.19512	1.81922	2.57102	0.22578	0.093563	0.357997
255	2.2561	1.87614	2.63605	0.246305	0.108325	0.384286
260	2.31707	1.93317	2.70098	0.246305	0.108325	0.384286
265	2.31707	1.93317	2.70098	0.246305	0.108325	0.384286
270	2.23577	1.85716	2.61439	0.307882	0.154003	0.461761
275	2.27642	1.89514	2.6577	0.328407	0.169616	0.487199
280	2.23577	1.85716	2.61439	0.348933	0.185392	0.512473
285	2.37805	1.99029	2.76581	0.472085	0.282828	0.661343
290	2.4187	2.02843	2.80897	0.533662	0.332955	0.734368
295	2.37805	1.99029	2.76581	0.513136	0.316159	0.710114
300	2.37805	1.99029	2.76581	0.554187	0.349833	0.758541
305	2.35772	1.97124	2.74421	0.574713	0.366787	0.782638
310	2.47967	2.08571	2.87364	0.636289	0.418074	0.854504
315	2.5813	2.18139	2.98121	0.67734	0.452585	0.902094
320	2.60163	2.20055	3.0027	0.718391	0.487328	0.949454
325	2.62195	2.21973	3.02417	0.841544	0.592769	1.09032
330	2.6626	2.25811	3.0671	0.923645	0.663937	1.18335
335	2.7439	2.33498	3.15282	1.02627	0.753732	1.29881
340	2.62195	2.21973	3.02417	1.14943	0.862548	1.4363
345	2.54065	2.14309	2.93821	1.25205	0.953998	1.55011
350	2.72358	2.31188	3.13528	1.23153	0.935656	1.5274

## Sheet: Panel_B
time	mSaccRate_Control_Mean	mSaccRate_Control_95ci_low	mSaccRate_Control_95ci_up	mSaccRate_Right_Mean	mSaccRate_Right_95ci_low	mSaccRate_Right_95ci_up
-100	1.13636	0.953479	1.31925	1.33278	1.13684	1.52872
-95	1.10319	0.922689	1.28368	1.31623	1.12135	1.5111
-90	1.13636	0.953479	1.31925	1.33278	1.13684	1.52872
-85	1.13636	0.953479	1.31925	1.38245	1.18338	1.58152
-80	1.19443	1.00747	1.38138	1.46523	1.26112	1.66934
-75	1.2359	1.04612	1.42568	1.49007	1.28448	1.69565
-70	1.26078	1.06934	1.45223	1.48179	1.27669	1.68688
-65	1.26908	1.07708	1.46107	1.44868	1.24556	1.65179
-60	1.32714	1.13272	1.52156	1.43212	1.23131	1.63293
-55	1.32714	1.13272	1.52156	1.37417	1.17695	1.57139
-50	1.35202	1.15601	1.54804	1.36589	1.16786	1.56393
-45	1.3935	1.19487	1.59213	1.28311	1.09039	1.47584
-40	1.3852	1.18576	1.58464	1.26656	1.07492	1.45819
-35	1.37691	1.17666	1.57716	1.27483	1.08129	1.46838
-30	1.3852	1.18313	1.58728	1.33278	1.1355	1.53006
-25	1.31885	1.12091	1.51678	1.36589	1.16654	1.56525
-20	1.31885	1.12091	1.51678	1.39073	1.18983	1.59162
-15	1.32714	1.12736	1.52692	1.40728	1.20537	1.6092
-10	1.31885	1.12091	1.51678	1.37417	1.1743	1.57405
-5	1.31885	1.12225	1.51544	1.31623	1.11867	1.51378
0	1.29396	1.09762	1.4903	1.24172	1.05036	1.43308
5	1.28567	1.09122	1.48012	1.25	1.05809	1.44191
10	1.26908	1.07571	1.46244	1.24172	1.04899	1.43445
15	1.29396	1.09897	1.48895	1.26656	1.07219	1.46092
20	1.26908	1.07571	1.46244	1.26656	1.07084	1.46227
25	1.26908	1.07708	1.46107	1.29139	1.09542	1.48736
30	1.31885	1.1236	1.51409	1.29139	1.09542	1.48736
35	1.30226	1.10809	1.49642	1.34106	1.14193	1.54019
40	1.28567	1.09122	1.48012	1.33278	1.13417	1.53139
45	1.36032	1.15978	1.56085	1.33278	1.1355	1.53006
50	1.3852	1.18444	1.58596	1.25	1.05947	1.44053
55	1.41009	1.2078	1.61237	1.13411	0.951567	1.31664
60	1.44326	1.23897	1.64756	1.02649	0.850376	1.2026
65	1.48474	1.27798	1.69149	0.943709	0.777139	1.11028
70	1.51792	1.30796	1.72787	0.877483	0.716405	1.03856
75	1.51792	1.30796	1.72787	0.827815	0.671028	0.984602
80	1.46815	1.26237	1.67393	0.753311	0.603269	0.903353
85	1.46815	1.26109	1.67521	0.637417	0.49872	0.776115
90	1.49303	1.28452	1.70155	0.562914	0.432165	0.693663
95	1.47644	1.2689	1.68399	0.471854	0.351691	0.592017
100	1.46815	1.26109	1.67521	0.372517	0.265309	0.479724
105	1.46815	1.26109	1.67521	0.31457	0.215817	0.413322
110	1.45985	1.25457	1.66514	0.231788	0.146732	0.316844
115	1.44326	1.24157	1.64496	0.124172	0.0616453	0.186699
120	1.46815	1.26496	1.67134	0.0993377	0.0433559	0.15532
125	1.41009	1.21043	1.60974	0.0331126	0.000705261	0.0655199
130	1.41009	1.21043	1.60974	0.0248344	-0.00324044	0.0529093
135	1.45156	1.24806	1.65506	0.0165563	-0.00637436	0.0394869
140	1.3852	1.18576	1.58464	0.0165563	-0.00637436	0.0394869
145	1.35202	1.15466	1.54938	0.0165563	-0.00637436	0.0394869
150	1.30226	1.10809	1.49642	0.0248344	-0.00324044	0.0529093
155	1.27737	1.08483	1.46991	0.057947	0.0151189	0.100775
160	1.26908	1.07708	1.46107	0.0745033	0.0259731	0.123034
165	1.26078	1.06934	1.45223	0.0910596	0.0374432	0.144676
170	1.20272	1.0152	1.39025	0.0993377	0.0433559	0.15532
175	1.2276	1.03979	1.41542	0.107616	0.0493676	0.165864
180	1.26908	1.07847	1.45969	0.115894	0.0554671	0.176321
185	1.29396	1.1017	1.48622	0.140728	0.074208	0.207249
190	1.31055	1.11721	1.50389	0.157285	0.0870073	0.227562
195	1.32714	1.13272	1.52156	0.173841	0.100007	0.247675
200	1.31885	1.12496	1.51273	0.182119	0.106573	0.257666
205	1.31885	1.12496	1.51273	0.198675	0.119823	0.277528
210	1.32714	1.13272	1.52156	0.248344	0.160363	0.336326
215	1.29396	1.1017	1.48622	0.331126	0.229877	0.432374
220	1.37691	1.17798	1.57583	0.372517	0.265309	0.479724
225	1.3935	1.19354	1.59345	0.430464	0.315494	0.545433
230	1.45985	1.25457	1.66514	0.471854	0.351691	0.592017
235	1.44326	1.23897	1.64756	0.513245	0.388138	0.638352
240	1.5428	1.33268	1.75292	0.562914	0.432165	0.693663
245	1.57598	1.36398	1.78798	0.653974	0.513584	0.794363
250	1.56768	1.35615	1.77922	0.728477	0.580773	0.876181
255	1.55109	1.33925	1.76294	0.786424	0.633336	0.939512
260	1.55109	1.33925	1.76294	0.877483	0.716405	1.03856
265	1.65063	1.43208	1.86918	0.943709	0.777139	1.11028
270	1.65063	1.43087	1.87039	1.02649	0.851877	1.2011
275	1.65893	1.43872	1.87913	1.12583	0.94244	1.30922
280	1.72528	1.50161	1.94896	1.28311	1.08768	1.47855
285	1.73358	1.50947	1.95768	1.44868	1.24298	1.65437
290	1.70869	1.48588	1.93151	1.50662	1.29754	1.71571
295	1.75846	1.53426	1.98266	1.53974	1.33	1.74947
300	1.76676	1.54331	1.9902	1.67219	1.45634	1.88803
305	1.78334	1.55788	2.00881	1.78808	1.56496	2.0112
310	1.82482	1.59728	2.05235	1.8957	1.66723	2.12416
315	1.858	1.63114	2.08485	1.95364	1.7224	2.18488
320	1.88288	1.65365	2.11211	2.01987	1.78554	2.25419
325	1.86629	1.63787	2.09471	2.08609	1.84877	2.32342
330	1.89947	1.66944	2.1295	2.11093	1.8714	2.35045
335	1.90776	1.67733	2.13819	2.21026	1.96646	2.45407
340	1.87459	1.64576	2.10341	2.26821	2.02199	2.51443
345	1.84141	1.61538	2.06744	2.31788	2.06964	2.56612
350	1.8497	1.62443	2.07497	2.33444	2.08553	2.58334

## Sheet: Panel_C
time	mSaccRate_Control_Mean	mSaccRate_Control_95ci_low	mSaccRate_Control_95ci_up	mSaccRate_Right_Mean	mSaccRate_Right_95ci_low	mSaccRate_Right_95ci_up
-100	2.41189	2.12492	2.69887	2.70999	2.36759	3.05238
-95	2.44493	2.15647	2.73339	2.75255	2.40826	3.09685
-90	2.52203	2.23018	2.81387	2.70999	2.36759	3.05238
-85	2.51101	2.21964	2.80238	2.6958	2.35405	3.03755
-80	2.52203	2.23018	2.81387	2.70999	2.36986	3.05012
-75	2.44493	2.15647	2.73339	2.78093	2.43763	3.12423
-70	2.42291	2.13544	2.71038	2.85187	2.50549	3.19825
-65	2.46696	2.17752	2.7564	2.76674	2.42407	3.10942
-60	2.46696	2.17752	2.7564	2.73837	2.39696	3.07977
-55	2.48899	2.19858	2.77939	2.85187	2.50549	3.19825
-50	2.47797	2.18805	2.7679	2.76674	2.42407	3.10942
-45	2.44493	2.15647	2.73339	2.73837	2.3947	3.08203
-40	2.43392	2.14595	2.72189	2.79512	2.44895	3.14129
-35	2.48899	2.19858	2.77939	2.88025	2.53044	3.23006
-30	2.45595	2.167	2.7449	2.83768	2.48968	3.18569
-25	2.47797	2.18805	2.7679	2.76674	2.42182	3.11167
-20	2.51101	2.21964	2.80238	2.92281	2.57124	3.27439
-15	2.48899	2.19858	2.77939	2.88025	2.53044	3.23006
-10	2.45595	2.167	2.7449	2.79512	2.44895	3.14129
-5	2.51101	2.21964	2.80238	2.75255	2.40826	3.09685
0	2.55507	2.2618	2.84833	2.61067	2.27514	2.9462
5	2.64317	2.34622	2.94013	2.55392	2.22111	2.88673
10	2.61013	2.31455	2.90572	2.46879	2.14017	2.7974
15	2.61013	2.31297	2.90729	2.41203	2.0863	2.73776
20	2.61013	2.31297	2.90729	2.35528	2.0325	2.67806
25	2.57709	2.28131	2.87287	2.29852	1.97876	2.61828
30	2.54405	2.24967	2.83843	2.36947	2.04594	2.69299
35	2.57709	2.28131	2.87287	2.42622	2.09976	2.75268
40	2.63216	2.33409	2.93023	2.31271	1.99219	2.63324
45	2.65419	2.35678	2.95159	2.11407	1.80465	2.4235
50	2.74229	2.44134	3.04324	2.02894	1.72458	2.33331
55	2.81938	2.51544	3.12332	1.91544	1.61811	2.21277
60	2.79736	2.49426	3.10045	1.67423	1.3931	1.95536
65	2.81938	2.51544	3.12332	1.53235	1.26164	1.80306
70	2.81938	2.51544	3.12332	1.43303	1.17006	1.696
75	2.68722	2.38848	2.98597	1.27696	1.02697	1.52694
80	2.64317	2.34622	2.94013	1.20602	0.962309	1.44972
85	2.64317	2.34622	2.94013	1.1067	0.872216	1.34118
90	2.6652	2.36734	2.96305	0.99319	0.769955	1.21642
95	2.61013	2.31455	2.90572	0.893871	0.68118	1.10656
100	2.63216	2.33566	2.92866	0.780363	0.580665	0.980061
105	2.59912	2.30399	2.89425	0.638479	0.456755	0.820203
110	2.59912	2.30399	2.89425	0.439841	0.287754	0.591928
115	2.61013	2.31455	2.90572	0.241203	0.127654	0.354752
120	2.62115	2.3251	2.91719	0.141884	0.054444	0.229324
125	2.56608	2.27235	2.85981	0.0851305	0.0172443	0.153017
130	2.46696	2.17752	2.7564	0.0283768	-0.0109068	0.0676605
135	2.43392	2.14595	2.72189	0.0141884	-0.0136051	0.0419819
140	2.47797	2.18805	2.7679	0	0	0
145	2.53304	2.24072	2.82536	0	0	0
150	2.51101	2.21964	2.80238	0	0	0
155	2.55507	2.2618	2.84833	0.0283768	-0.0109068	0.0676605
160	2.57709	2.28289	2.87129	0.0283768	-0.0109068	0.0676605
165	2.48899	2.19858	2.77939	0.0425653	-0.00551979	0.0906503
170	2.5	2.20911	2.79089	0.0709421	0.00893532	0.132949
175	2.52203	2.23018	2.81387	0.0851305	0.0172443	0.153017
180	2.58811	2.29344	2.88277	0.0851305	0.0172443	0.153017
185	2.57709	2.28289	2.87129	0.0851305	0.0172443	0.153017
190	2.67621	2.37791	2.97451	0.099319	0.0260353	0.172603
195	2.67621	2.37791	2.97451	0.099319	0.0260353	0.172603
200	2.6652	2.36734	2.96305	0.156073	0.0644172	0.247728
205	2.64317	2.34465	2.94169	0.227015	0.116792	0.337237
210	2.72026	2.41864	3.02189	0.26958	0.149676	0.389484
215	2.64317	2.34465	2.94169	0.354711	0.217651	0.49177
220	2.64317	2.34465	2.94169	0.411464	0.264192	0.558737
225	2.64317	2.3431	2.94325	0.439841	0.287754	0.591928
230	2.67621	2.3748	2.97762	0.553348	0.383567	0.72313
235	2.67621	2.3748	2.97762	0.666856	0.48136	0.852352
240	2.6652	2.36423	2.96617	0.80874	0.60569	1.01179
245	2.69824	2.39595	3.00053	0.908059	0.693818	1.1223
250	2.69824	2.39595	3.00053	0.964813	0.744519	1.18511
255	2.69824	2.39749	2.99898	1.03575	0.808209	1.2633
260	2.64317	2.34465	2.94169	1.20602	0.962309	1.44972
265	2.72026	2.42019	3.02034	1.37628	1.1179	1.63465
270	2.65419	2.35678	2.95159	1.50397	1.23543	1.77251
275	2.64317	2.34622	2.94013	1.5891	1.31414	1.86407
280	2.72026	2.42019	3.02034	1.63167	1.35359	1.90975
285	2.85242	2.54723	3.15762	1.68842	1.40629	1.97055
290	2.85242	2.54723	3.15762	1.81612	1.52524	2.10699
295	2.92952	2.62146	3.23757	1.88706	1.59155	2.18257
300	2.92952	2.62146	3.23757	1.958	1.65799	2.25801
305	2.86344	2.55783	3.16904	2.01476	1.71125	2.31826
310	3.00661	2.69579	3.31743	2.04313	1.73791	2.34836
315	3.13877	2.82341	3.45412	2.00057	1.69793	2.30321
320	3.29295	2.97261	3.61329	1.91544	1.61811	2.21277
325	3.28194	2.96194	3.60193	1.97219	1.6713	2.27308
330	3.23789	2.91929	3.55648	1.97219	1.6713	2.27308
335	3.30396	2.98328	3.62465	2.01476	1.71125	2.31826
340	3.29295	2.97261	3.61329	1.94381	1.64469	2.24294
345	3.2489	2.92995	3.56785	1.91544	1.61811	2.21277
350	3.30396	2.98328	3.62465	1.91544	1.61811	2.21277

## Sheet: Panel_D
time	vEyeVel350_Mean	vEyeVel350_95ci_low	vEyeVel350_95ci_up
-100	4.00652	-2.49245	10.5055
-99	4.16988	-2.15693	10.4967
-98	3.80314	-2.32969	9.93596
-97	3.10819	-2.83157	9.04795
-96	2.34128	-3.41224	8.0948
-95	1.74706	-3.81419	7.30832
-94	1.45347	-3.89147	6.79842
-93	1.45105	-3.66749	6.56958
-92	1.71843	-3.1999	6.63676
-91	2.05724	-2.72807	6.84254
-90	2.33881	-2.38876	7.06638
-89	2.44395	-2.27855	7.16645
-88	2.23128	-2.48771	6.95027
-87	1.58447	-3.08411	6.25305
-86	0.625642	-3.93746	5.18874
-85	-0.4707	-4.89935	3.95795
-84	-1.66626	-5.99138	2.65887
-83	-2.73406	-7.04562	1.5775
-82	-3.48873	-7.89083	0.913357
-81	-3.76414	-8.32947	0.801182
-80	-3.66608	-8.38153	1.04936
-79	-3.16981	-7.95833	1.61872
-78	-2.38433	-7.13561	2.36696
-77	-1.42336	-6.05416	3.20744
-76	-0.56578	-5.03499	3.90343
-75	0.0939314	-4.25202	4.43988
-74	0.395459	-3.91245	4.70336
-73	0.336423	-4.01387	4.68671
-72	0.018612	-4.41935	4.45658
-71	-0.425669	-4.94012	4.08878
-70	-0.950174	-5.52795	3.6276
-69	-1.36302	-5.976	3.24997
-68	-1.5314	-6.15459	3.0918
-67	-1.46151	-6.06628	3.14326
-66	-1.22438	-5.76317	3.31442
-65	-0.850663	-5.27536	3.57404
-64	-0.554904	-4.85068	3.74087
-63	-0.469726	-4.6733	3.73385
-62	-0.632447	-4.84135	3.57645
-61	-1.08982	-5.42042	3.24079
-60	-1.66299	-6.20477	2.87879
-59	-2.32608	-7.08746	2.43529
-58	-2.95177	-7.86395	1.96041
-57	-3.35964	-8.32551	1.60624
-56	-3.41737	-8.33132	1.49658
-55	-3.22935	-8.02045	1.56174
-54	-2.81898	-7.47384	1.83587
-53	-2.2983	-6.86047	2.26388
-52	-1.82616	-6.3741	2.72178
-51	-1.36883	-5.98223	3.24458
-50	-1.10091	-5.82029	3.61846
-49	-1.0177	-5.8342	3.79879
-48	-1.06233	-5.92235	3.79768
-47	-1.22836	-6.07615	3.61943
-46	-1.46969	-6.27171	3.33232
-45	-1.69954	-6.44073	3.04165
-44	-1.85291	-6.5459	2.84008
-43	-1.86462	-6.52554	2.7963
-42	-1.76021	-6.39022	2.8698
-41	-1.63576	-6.2119	2.94038
-40	-1.50366	-5.97876	2.97144
-39	-1.25234	-5.59343	3.08876
-38	-0.952333	-5.16609	3.26142
-37	-0.653714	-4.77004	3.46262
-36	-0.20834	-4.28038	3.8637
-35	0.26003	-3.83532	4.35538
-34	0.818017	-3.36607	5.0021
-33	1.44728	-2.86684	5.76141
-32	2.10217	-2.37928	6.58362
-31	2.74229	-1.90247	7.38705
-30	3.2689	-1.4758	8.0136
-29	3.63381	-1.10902	8.37664
-28	3.83812	-0.804028	8.48026
-27	3.82853	-0.63972	8.29678
-26	3.52044	-0.781304	7.82219
-25	2.94154	-1.26983	7.15291
-24	2.09978	-2.13775	6.33731
-23	1.07513	-3.27357	5.42382
-22	0.114109	-4.34717	4.57538
-21	-0.822214	-5.36026	3.71584
-20	-1.44033	-5.99535	3.1147
-19	-1.66627	-6.19931	2.86678
-18	-1.47	-5.97379	3.03378
-17	-0.858117	-5.36116	3.64493
-16	0.0634601	-4.4679	4.59482
-15	1.14841	-3.41641	5.71324
-14	2.20909	-2.37104	6.78921
-13	3.11439	-1.45365	7.68243
-12	3.73006	-0.809017	8.26914
-11	3.96326	-0.543623	8.47013
-10	3.98803	-0.501409	8.47746
-9	3.84326	-0.642365	8.32888
-8	3.54591	-0.945333	8.03715
-7	3.23724	-1.26294	7.73741
-6	2.87929	-1.61031	7.36888
-5	2.588	-1.85212	7.02812
-4	2.36531	-1.98502	6.71564
-3	2.19754	-2.05391	6.44899
-2	2.03168	-2.1455	6.20887
-1	1.85474	-2.29839	6.00787
0	1.74758	-2.45238	5.94753
1	1.7118	-2.57488	5.99848
2	1.7309	-2.63937	6.10118
3	1.78329	-2.63458	6.20115
4	1.81402	-2.61209	6.24014
5	1.77066	-2.65389	6.19522
6	1.69859	-2.73594	6.13311
7	1.36109	-3.11501	5.8372
8	0.740505	-3.79961	5.28062
9	-0.147107	-4.75189	4.45768
10	-1.22437	-5.85852	3.40977
11	-2.47194	-7.10545	2.16156
12	-3.71431	-8.33126	0.902639
13	-4.76603	-9.35908	-0.172975
14	-5.6135	-10.1948	-1.03216
15	-6.0611	-10.6328	-1.48939
16	-6.16808	-10.7141	-1.62205
17	-5.95737	-10.4548	-1.45993
18	-5.53017	-9.96535	-1.09499
19	-4.92838	-9.3143	-0.542465
20	-4.20735	-8.59169	0.176998
21	-3.45048	-7.90585	1.00488
22	-2.70799	-7.29455	1.87857
23	-1.91855	-6.65113	2.81404
24	-1.04845	-5.89569	3.79878
25	-0.133908	-5.02398	4.75616
26	0.830133	-4.02965	5.68991
27	1.84352	-2.91946	6.60651
28	2.82534	-1.81227	7.46295
29	3.72421	-0.79737	8.2458
30	4.54087	0.0965272	8.98521
31	5.1578	0.746287	9.56931
32	5.53332	1.13458	9.93206
33	5.55476	1.16919	9.94032
34	5.30208	0.944801	9.65937
35	4.79525	0.483558	9.10695
36	3.95973	-0.313532	8.23299
37	2.95917	-1.31046	7.2288
38	1.8063	-2.49746	6.11007
39	0.697531	-3.67201	5.06707
40	-0.262175	-4.68653	4.16218
41	-1.05219	-5.5006	3.39622
42	-1.63012	-6.06758	2.80734
43	-2.07921	-6.47951	2.32108
44	-2.27757	-6.62304	2.0679
45	-2.28888	-6.58436	2.00661
46	-2.15214	-6.42106	2.11678
47	-2.03596	-6.30834	2.23642
48	-1.99302	-6.30571	2.31968
49	-1.93284	-6.30219	2.43652
50	-1.96608	-6.39928	2.46712
51	-2.07367	-6.57818	2.43084
52	-2.04982	-6.6103	2.51066
53	-2.02763	-6.62405	2.5688
54	-1.99335	-6.61166	2.62497
55	-1.98869	-6.61328	2.6359
56	-2.01705	-6.62748	2.59338
57	-2.20812	-6.79141	2.37516
58	-2.61739	-7.14773	1.91296
59	-3.17998	-7.62763	1.26767
60	-3.90381	-8.2464	0.438777
61	-4.58186	-8.8146	-0.349112
62	-5.17278	-9.32497	-1.02058
63	-5.53085	-9.65397	-1.40773
64	-5.53141	-9.70029	-1.36254
65	-5.18804	-9.47272	-0.903365
66	-4.55018	-8.98368	-0.116683
67	-3.67602	-8.24255	0.890499
68	-2.68092	-7.30893	1.94708
69	-1.67045	-6.25875	2.91784
70	-0.742075	-5.17668	3.69253
71	0.0393992	-4.17028	4.24908
72	0.714769	-3.26246	4.692
73	1.38456	-2.4286	5.19773
74	2.21002	-1.57778	5.99782
75	3.22167	-0.669837	7.11318
76	4.33655	0.27712	8.39598
77	5.57552	1.3591	9.79193
78	6.9477	2.62963	11.2658
79	8.38748	4.03302	12.7419
80	9.73759	5.3847	14.0905
81	11.1239	6.77075	15.477
82	12.3208	7.97044	16.6711
83	13.4687	9.10365	17.8338
84	14.615	10.2221	19.0078
85	15.9248	11.4828	20.3668
86	17.403	12.907	21.8991
87	19.2575	14.7256	23.7893
88	21.3358	16.815	25.8565
89	23.5465	19.1153	27.9778
90	25.8716	21.5619	30.1812
91	28.0245	23.8252	32.2239
92	29.793	25.6194	33.9666
93	31.1871	26.9218	35.4525
94	32.2141	27.7659	36.6624
95	32.7302	28.0781	37.3822
96	33.0171	28.2238	37.8105
97	33.1505	28.3268	37.9741
98	33.2629	28.5179	38.0078
99	33.5104	28.9249	38.096
100	33.9404	29.535	38.3458
101	34.5616	30.2877	38.8356
102	35.2419	31.0095	39.4743
103	35.8956	31.6181	40.1731
104	36.3087	31.9518	40.6657
105	36.4361	32.0144	40.8577
106	36.2899	31.8569	40.723
107	35.8212	31.4407	40.2016
108	35.2437	30.9529	39.5345
109	34.6351	30.4218	38.8484
110	34.0456	29.8494	38.2418
111	33.5469	29.2821	37.8116
112	33.2774	28.8962	37.6585
113	32.9456	28.4386	37.4526
114	32.5151	27.9363	37.0938
115	31.9541	27.3814	36.5268
116	31.2115	26.7033	35.7198
117	30.2029	25.7678	34.6379
118	29.0353	24.6283	33.4423
119	27.7654	23.3197	32.2111
120	26.5661	22.0421	31.09
121	25.5257	20.9389	30.1126
122	24.6767	20.0801	29.2733
123	24.103	19.5388	28.6673
124	23.6497	19.1396	28.1597
125	23.4696	18.9973	27.9419
126	23.3741	18.9093	27.8388
127	23.3033	18.8405	27.7661
128	23.3146	18.878	27.7512
129	23.3065	18.898	27.715
130	23.2174	18.8518	27.5829
131	23.0163	18.6703	27.3623
132	22.6698	18.327	27.0127
133	22.0039	17.659	26.3487
134	21.2417	16.9038	25.5795
135	20.3496	16.0313	24.668
136	19.3005	14.9746	23.6265
137	18.2426	13.8561	22.629
138	17.2696	12.7865	21.7528
139	16.4242	11.8494	20.999
140	15.7278	11.1025	20.3531
141	15.3344	10.7269	19.942
142	15.0642	10.528	19.6003
143	14.8471	10.4143	19.2798
144	14.7356	10.3998	19.0715
145	14.5764	10.2837	18.869
146	14.3462	10.0437	18.6486
147	14.1796	9.80651	18.5526
148	13.9098	9.44084	18.3787
149	13.535	9.00114	18.0689
150	13.1113	8.57042	17.6522
151	12.6721	8.1864	17.1578
152	12.1341	7.7346	16.5336
153	11.517	7.1764	15.8576
154	10.8659	6.51414	15.2177
155	10.1801	5.73169	14.6286
156	9.5351	4.95956	14.1106
157	9.01729	4.33528	13.6993
158	8.71473	3.99595	13.4335
159	8.58954	3.92556	13.2535
160	8.73877	4.1984	13.2791
161	9.15192	4.74851	13.5553
162	9.53813	5.2266	13.8497
163	9.925	5.60063	14.2494
164	10.4139	5.98079	14.847
165	10.7163	6.12956	15.303
166	10.8993	6.18728	15.6114
167	10.9434	6.17247	15.7144
168	10.9357	6.17847	15.6929
169	10.9051	6.20231	15.6079
170	10.8457	6.20502	15.4865
171	10.6925	6.0906	15.2944
172	10.408	5.80973	15.0064
173	9.99166	5.38194	14.6014
174	9.34519	4.74167	13.9487
175	8.44387	3.88995	12.9978
176	7.44451	2.96497	11.924
177	6.40005	1.96461	10.8355
178	5.32072	0.859863	9.78157
179	4.37673	-0.168524	8.92198
180	3.80117	-0.843985	8.44633
181	3.47759	-1.20352	8.1587
182	3.44019	-1.1769	8.05729
183	3.57923	-0.901294	8.05974
184	3.70643	-0.625508	8.03836
185	3.76148	-0.482464	8.00543
186	3.68341	-0.573475	7.9403
187	3.29567	-1.03531	7.62664
188	2.51166	-1.89228	6.9156
189	1.45518	-2.96767	5.87804
190	0.222324	-4.15967	4.60432
191	-1.01278	-5.31062	3.28506
192	-2.20893	-6.4383	2.02044
193	-3.10688	-7.32179	1.10802
194	-3.65914	-7.91297	0.594703
195	-3.81152	-8.13199	0.508942
196	-3.60191	-8.00278	0.798958
197	-3.05681	-7.52005	1.40643
198	-2.28492	-6.78103	2.21118
199	-1.39739	-5.90861	3.11383
200	-0.491559	-4.98541	4.0023
201	0.245431	-4.22471	4.71558
202	0.780032	-3.68255	5.24261
203	1.10947	-3.35646	5.57539
204	1.12132	-3.34944	5.59208
205	0.890344	-3.57429	5.35498
206	0.450751	-3.98622	4.88772
207	-0.217603	-4.60538	4.17017
208	-1.04708	-5.3943	3.30014
209	-1.778	-6.12534	2.56935
210	-2.57609	-6.99194	1.83976
211	-3.23893	-7.75957	1.28171
212	-3.65547	-8.26286	0.951919
213	-3.89945	-8.51963	0.720737
214	-4.14089	-8.68612	0.404342
215	-4.19841	-8.6147	0.217881
216	-4.28182	-8.57472	0.011073
217	-4.47144	-8.71778	-0.225108
218	-4.83506	-9.11063	-0.55949
219	-5.37807	-9.71877	-1.03736
220	-5.85594	-10.2483	-1.46357
221	-6.21975	-10.6042	-1.83528
222	-6.4579	-10.786	-2.12978
223	-6.37396	-10.6348	-2.11315
224	-5.97198	-10.2022	-1.74177
225	-5.30857	-9.55506	-1.06209
226	-4.40109	-8.69442	-0.107757
227	-3.51046	-7.8352	0.814289
228	-2.77169	-7.09229	1.54891
229	-2.20738	-6.48898	2.07423
230	-1.91898	-6.15665	2.3187
231	-1.99672	-6.22378	2.23034
232	-2.23896	-6.50026	2.02234
233	-2.6285	-6.96953	1.71253
234	-3.02431	-7.46673	1.4181
235	-3.35249	-7.89722	1.19224
236	-3.66721	-8.28928	0.954867
237	-3.99618	-8.65347	0.66112
238	-4.28012	-8.93002	0.369774
239	-4.72368	-9.32501	-0.122361
240	-5.38774	-9.89376	-0.881725
241	-6.26532	-10.6684	-1.86227
242	-7.36141	-11.6802	-3.0426
243	-8.65599	-12.9427	-4.36929
244	-9.9072	-14.2324	-5.58201
245	-11.0274	-15.4316	-6.62315
246	-11.9514	-16.4174	-7.4855
247	-12.5363	-17.0109	-8.06169
248	-12.791	-17.1983	-8.38377
249	-12.6128	-16.9179	-8.30782
250	-12.033	-16.2632	-7.80278
251	-11.0861	-15.3375	-6.83462
252	-9.77935	-14.1522	-5.40655
253	-8.31335	-12.868	-3.75871
254	-6.70752	-11.4292	-1.9858
255	-5.03123	-9.85979	-0.202661
256	-3.5213	-8.37077	1.32816
257	-2.29766	-7.09711	2.50179
258	-1.61679	-6.31355	3.07998
259	-1.47139	-6.04006	3.09729
260	-2.00662	-6.44717	2.43393
261	-3.13512	-7.48995	1.21972
262	-4.81171	-9.16616	-0.457254
263	-6.76305	-11.2131	-2.31296
264	-8.78748	-13.3747	-4.20027
265	-10.5789	-15.2916	-5.86618
266	-11.9888	-16.7564	-7.22116
267	-12.7931	-17.5367	-8.04948
268	-12.8982	-17.5597	-8.23667
269	-12.2871	-16.8647	-7.7096
270	-11.0701	-15.6076	-6.5326
271	-9.50284	-14.0477	-4.95795
272	-7.76859	-12.3612	-3.17603
273	-6.08487	-10.7179	-1.45182
274	-4.64525	-9.28505	-0.00545307
275	-3.75612	-8.36692	0.854671
276	-3.4345	-7.99412	1.12512
277	-3.74104	-8.27438	0.792311
278	-4.5533	-9.08941	-0.0172011
279	-5.78408	-10.3322	-1.23595
280	-7.17046	-11.7261	-2.61479
281	-8.39904	-12.9345	-3.86356
282	-9.36605	-13.869	-4.86312
283	-9.90487	-14.3876	-5.42212
284	-9.91955	-14.4171	-5.42202
285	-9.36265	-13.9082	-4.8171
286	-8.28853	-12.8995	-3.67757
287	-7.01546	-11.6685	-2.36244
288	-5.63159	-10.2741	-0.989084
289	-4.40537	-9.0005	0.189762
290	-3.44127	-7.97062	1.08809
291	-2.87477	-7.35098	1.60144
292	-2.77847	-7.23334	1.67639
293	-3.13662	-7.5881	1.31485
294	-3.72836	-8.18208	0.725363
295	-4.57028	-9.02734	-0.113214
296	-5.47738	-9.94126	-1.0135
297	-6.3919	-10.8638	-1.91997
298	-7.16905	-11.6381	-2.69998
299	-7.85973	-12.319	-3.40046
300	-8.46513	-12.903	-4.02728
301	-8.98965	-13.4137	-4.56563
302	-9.47445	-13.9235	-5.02543
303	-9.82878	-14.3346	-5.32298
304	-10.0648	-14.6322	-5.49745
305	-10.1698	-14.7731	-5.56647
306	-10.1512	-14.7466	-5.55573
307	-10.0038	-14.5399	-5.46774
308	-9.6841	-14.1454	-5.22279
309	-9.31897	-13.7421	-4.89587
310	-8.9596	-13.392	-4.52719
311	-8.64625	-13.1282	-4.16435
312	-8.56624	-13.0832	-4.04928
313	-8.75083	-13.2472	-4.25445
314	-9.00986	-13.4184	-4.6013
315	-9.32603	-13.6105	-5.04156
316	-9.74377	-13.9298	-5.55773
317	-10.1957	-14.3586	-6.03275
318	-10.5565	-14.7764	-6.33653
319	-10.6939	-15.0057	-6.38202
320	-10.607	-14.9953	-6.2186
321	-10.2816	-14.6929	-5.87031
322	-9.6633	-14.057	-5.26958
323	-8.80331	-13.1651	-4.44155
324	-7.85676	-12.1819	-3.53158
325	-6.90383	-11.2086	-2.59911
326	-6.08912	-10.3798	-1.79846
327	-5.54746	-9.8294	-1.26553
328	-5.4402	-9.72326	-1.15714
329	-5.78282	-10.0898	-1.4759
330	-6.5427	-10.9025	-2.18288
331	-7.68018	-12.1146	-3.24572
332	-9.03955	-13.5554	-4.52366
333	-10.4165	-14.9934	-5.83956
334	-11.5106	-16.1237	-6.89746
335	-12.1046	-16.7396	-7.46946
336	-12.1797	-16.8362	-7.52319
337	-11.5746	-16.2462	-6.90303
338	-10.4143	-15.0965	-5.73202
339	-8.8931	-13.5655	-4.22073
340	-7.11256	-11.7369	-2.48822
341	-5.39333	-9.9384	-0.848258
342	-4.00054	-8.45547	0.454385
343	-3.05172	-7.40949	1.30605
344	-2.62501	-6.90685	1.65683
345	-2.76508	-7.00649	1.47633
346	-3.50685	-7.74018	0.726473
347	-4.49748	-8.77348	-0.221479
348	-5.56843	-9.9212	-1.21567
349	-6.58086	-11.0243	-2.13742
350	-7.30391	-11.8431	-2.76473

## Sheet: Panel_E
time	vEyeVel350_Mean	vEyeVel350_95ci_low	vEyeVel350_95ci_up
-100	7.04819	3.71072	10.3857
-99	7.056	3.74999	10.362
-98	7.20894	3.94372	10.4742
-97	7.59472	4.38531	10.8041
-96	8.06185	4.91627	11.2074
-95	8.45039	5.36374	11.537
-94	8.69822	5.65744	11.739
-93	8.8009	5.77898	11.8228
-92	8.67169	5.65433	11.689
-91	8.36788	5.34673	11.389
-90	7.91197	4.88163	10.9423
-89	7.38065	4.32807	10.4332
-88	6.87334	3.78196	9.96472
-87	6.379	3.2512	9.5068
-86	5.9149	2.76364	9.06616
-85	5.60095	2.45813	8.74376
-84	5.37569	2.28404	8.46734
-83	5.26975	2.25165	8.28786
-82	5.27335	2.31879	8.2279
-81	5.36962	2.4423	8.29694
-80	5.62373	2.67143	8.57603
-79	5.9659	2.94211	8.98969
-78	6.41424	3.29704	9.53144
-77	6.88968	3.69318	10.0862
-76	7.34835	4.11169	10.585
-75	7.72599	4.50625	10.9457
-74	7.87133	4.7095	11.0332
-73	7.8085	4.71519	10.9018
-72	7.51108	4.45716	10.565
-71	6.91284	3.84536	9.98033
-70	6.1193	2.98994	9.24867
-69	5.2162	2.006	8.42641
-68	4.31051	1.03619	7.58483
-67	3.57789	0.276065	6.87971
-66	3.04793	-0.234258	6.33012
-65	2.89054	-0.337294	6.11838
-64	3.11203	-0.0494729	6.27353
-63	3.67502	0.561406	6.78864
-62	4.52011	1.4298	7.61041
-61	5.46589	2.37342	8.55836
-60	6.49631	3.38359	9.60903
-59	7.45049	4.313	10.588
-58	8.17775	5.0157	11.3398
-57	8.61421	5.4361	11.7923
-56	8.812	5.62169	12.0023
-55	8.77164	5.58816	11.9551
-54	8.53754	5.376	11.6991
-53	8.15084	5.01869	11.283
-52	7.67656	4.56815	10.785
-51	7.24732	4.15173	10.3429
-50	6.8126	3.70755	9.91764
-49	6.45047	3.32042	9.58052
-48	6.18961	3.03219	9.34704
-47	5.98032	2.81747	9.14318
-46	5.91482	2.77339	9.05625
-45	5.96824	2.87604	9.06043
-44	6.10644	3.06252	9.15036
-43	6.42673	3.39623	9.45724
-42	6.82194	3.76381	9.88008
-41	7.28952	4.17221	10.4068
-40	7.85825	4.678	11.0385
-39	8.30299	5.07751	11.5285
-38	8.67243	5.43252	11.9123
-37	8.79408	5.55961	12.0285
-36	8.67872	5.44797	11.9095
-35	8.3386	5.11147	11.5657
-34	7.75657	4.52465	10.9885
-33	7.08363	3.85209	10.3152
-32	6.32882	3.10906	9.54858
-31	5.65151	2.45739	8.84564
-30	5.09515	1.94126	8.24904
-29	4.6819	1.57865	7.78514
-28	4.42895	1.3807	7.47721
-27	4.37833	1.38084	7.37583
-26	4.48579	1.51455	7.45702
-25	4.71111	1.73153	7.6907
-24	4.99299	1.97015	8.01582
-23	5.30118	2.22441	8.37794
-22	5.61966	2.49974	8.73959
-21	5.80933	2.67603	8.94262
-20	5.95361	2.8321	9.07512
-19	6.00851	2.90964	9.10737
-18	5.94128	2.85445	9.02812
-17	5.80715	2.71014	8.90416
-16	5.6269	2.50445	8.74934
-15	5.43395	2.29572	8.57218
-14	5.23176	2.1004	8.36313
-13	5.05119	1.95559	8.14679
-12	5.00391	1.95991	8.04791
-11	5.07667	2.07323	8.08011
-10	5.17571	2.1892	8.16222
-9	5.32181	2.33733	8.30629
-8	5.58015	2.59819	8.56212
-7	5.84941	2.87511	8.82371
-6	6.1666	3.19855	9.13464
-5	6.44424	3.47393	9.41454
-4	6.70057	3.70816	9.69298
-3	6.86238	3.8377	9.88706
-2	6.93225	3.87907	9.98542
-1	6.88426	3.81813	9.9504
0	6.73078	3.66401	9.79755
1	6.45722	3.38973	9.52471
2	6.13365	3.06443	9.20287
3	5.76166	2.6836	8.83972
4	5.37598	2.28729	8.46466
5	5.099	2.00942	8.18857
6	4.90795	1.82088	7.99501
7	4.81788	1.7328	7.90295
8	4.86291	1.76814	7.95767
9	5.02649	1.91256	8.14043
10	5.23487	2.09266	8.37707
11	5.38538	2.2134	8.55736
12	5.47559	2.28283	8.66834
13	5.44463	2.25196	8.6373
14	5.42011	2.2431	8.59712
15	5.26789	2.11159	8.4242
16	5.09182	1.95289	8.23074
17	4.84639	1.72346	7.96933
18	4.58009	1.46585	7.69433
19	4.3492	1.24169	7.45671
20	4.14253	1.04008	7.24498
21	4.06273	0.95208	7.17339
22	4.07105	0.944594	7.19751
23	4.1804	1.04741	7.31339
24	4.36039	1.23714	7.48364
25	4.70426	1.60058	7.80795
26	5.11827	2.03873	8.19781
27	5.60312	2.53337	8.67287
28	6.18818	3.10138	9.27499
29	6.7615	3.64473	9.87828
30	7.249	4.1157	10.3823
31	7.63585	4.5067	10.765
32	7.84807	4.73474	10.9614
33	7.83999	4.73641	10.9436
34	7.62473	4.5036	10.7459
35	7.21966	4.06183	10.3775
36	6.68717	3.48569	9.88866
37	6.17347	2.95264	9.39431
38	5.7778	2.57792	8.97769
39	5.50611	2.35553	8.65669
40	5.49117	2.40687	8.57547
41	5.77348	2.75188	8.79508
42	6.28142	3.2996	9.26324
43	7.00357	4.03067	9.97647
44	7.69276	4.69943	10.6861
45	8.31843	5.28607	11.3508
46	8.71053	5.63176	11.7893
47	8.82871	5.72481	11.9326
48	8.76969	5.67209	11.8673
49	8.61002	5.53162	11.6884
50	8.4742	5.40155	11.5469
51	8.44273	5.34488	11.5406
52	8.70459	5.55592	11.8533
53	9.30463	6.1157	12.4936
54	10.2548	7.05832	13.4513
55	11.4717	8.30796	14.6355
56	12.7186	9.60642	15.8307
57	13.9611	10.8792	17.043
58	14.9301	11.8354	18.0248
59	15.6868	12.5414	18.8322
60	16.2077	13.0065	19.4089
61	16.5593	13.3359	19.7827
62	16.9297	13.7249	20.1345
63	17.3643	14.2115	20.5171
64	18.0458	14.9544	21.1372
65	18.8944	15.8434	21.9454
66	19.9509	16.9009	23.0009
67	21.1439	18.0648	24.223
68	22.2623	19.1362	25.3884
69	23.2871	20.1131	26.461
70	24.0846	20.869	27.3002
71	24.598	21.3637	27.8322
72	24.9377	21.7059	28.1695
73	25.1632	21.9637	28.3626
74	25.3126	22.1607	28.4645
75	25.5935	22.4922	28.6948
76	25.9866	22.9203	29.0529
77	26.5953	23.5345	29.6562
78	27.3814	24.3066	30.4563
79	28.3099	25.2261	31.3938
80	29.2744	26.2047	32.3441
81	30.2054	27.193	33.2178
82	31.0339	28.1036	33.9642
83	31.5926	28.7478	34.4375
84	31.8979	29.0936	34.7022
85	31.8142	28.9804	34.648
86	31.4402	28.5213	34.3591
87	30.6964	27.6778	33.715
88	29.8321	26.7308	32.9335
89	28.8618	25.7136	32.0099
90	27.8686	24.7108	31.0264
91	27.0346	23.8841	30.1851
92	26.3819	23.2328	29.531
93	26.0769	22.9147	29.2391
94	25.9478	22.7686	29.1271
95	26.0439	22.8514	29.2363
96	26.2761	23.0839	29.4683
97	26.5363	23.3646	29.708
98	26.7615	23.6182	29.9048
99	26.8462	23.7335	29.9589
100	26.7592	23.6688	29.8497
101	26.6601	23.5795	29.7406
102	26.5143	23.4297	29.5989
103	26.3072	23.2031	29.4114
104	26.1388	23.0065	29.2711
105	25.9585	22.7947	29.1223
106	25.7702	22.5803	28.9602
107	25.5072	22.3101	28.7042
108	25.187	22.0023	28.3717
109	24.7251	21.5708	27.8794
110	24.0934	20.9811	27.2056
111	23.3585	20.2839	26.4331
112	22.5339	19.4905	25.5773
113	21.763	18.7389	24.7871
114	21.1132	18.0887	24.1376
115	20.789	17.7497	23.8284
116	20.7757	17.7012	23.8501
117	21.1401	18.023	24.2572
118	21.8087	18.6463	24.9711
119	22.6208	19.4293	25.8123
120	23.5002	20.2962	26.7041
121	24.2366	21.0402	27.433
122	24.6673	21.4978	27.8368
123	24.6982	21.5618	27.8345
124	24.2734	21.1602	27.3865
125	23.43	20.3191	26.5408
126	22.2697	19.143	25.3964
127	20.9294	17.7843	24.0746
128	19.6173	16.462	22.7726
129	18.4839	15.3364	21.6315
130	17.7079	14.5859	20.8299
131	17.2985	14.2156	20.3814
132	17.2765	14.2325	20.3205
133	17.5697	14.5607	20.5787
134	18.1095	15.1148	21.1043
135	18.7268	15.7207	21.7328
136	19.2289	16.1966	22.2611
137	19.5942	16.5292	22.6592
138	19.6032	16.5142	22.6921
139	19.292	16.1946	22.3893
140	18.7003	15.6093	21.7914
141	17.9311	14.8533	21.009
142	17.1232	14.0591	20.1874
143	16.3629	13.3043	19.4215
144	15.7124	12.6497	18.7751
145	15.2441	12.1673	18.321
146	14.8762	11.7779	17.9745
147	14.5583	11.4409	17.6756
148	14.1774	11.052	17.3027
149	13.661	10.5421	16.7799
150	12.9431	9.82869	16.0575
151	11.9368	8.81096	15.0626
152	10.7354	7.57761	13.8932
153	9.36758	6.16557	12.5696
154	7.99897	4.76024	11.2377
155	6.7035	3.46619	9.9408
156	5.53784	2.3296	8.74609
157	4.60711	1.43676	7.77745
158	3.84971	0.709973	6.98944
159	3.21787	0.084547	6.3512
160	2.6973	-0.453972	5.84857
161	2.17397	-0.996752	5.34469
162	1.62461	-1.54808	4.79731
163	1.10374	-2.04515	4.25262
164	0.660172	-2.44732	3.76766
165	0.264215	-2.79802	3.32645
166	0.0561531	-2.98637	3.09868
167	0.0344142	-3.01944	3.08827
168	0.252116	-2.84719	3.35142
169	0.65116	-2.51104	3.81336
170	1.18774	-2.03727	4.41274
171	1.74496	-1.52468	5.01459
172	2.22723	-1.05645	5.51091
173	2.44634	-0.821398	5.71407
174	2.4132	-0.821416	5.64781
175	2.14378	-1.05444	5.342
176	1.66014	-1.50411	4.82438
177	1.0002	-2.13396	4.13436
178	0.277887	-2.8348	3.39057
179	-0.398571	-3.49432	2.69718
180	-0.960752	-4.05666	2.13516
181	-1.27171	-4.39444	1.85102
182	-1.33511	-4.49633	1.8261
183	-1.17025	-4.37268	2.03218
184	-0.781452	-4.01038	2.44747
185	-0.308861	-3.53087	2.91315
186	0.157147	-3.02709	3.34139
187	0.477873	-2.64925	3.60499
188	0.637058	-2.44368	3.7178
189	0.666628	-2.39526	3.72852
190	0.574299	-2.50451	3.6531
191	0.408045	-2.71301	3.5291
192	0.155966	-3.0124	3.32433
193	-0.0305626	-3.23204	3.17091
194	-0.14555	-3.35898	3.06788
195	-0.124348	-3.32394	3.07525
196	0.029616	-3.14185	3.20108
197	0.254126	-2.89409	3.40234
198	0.487969	-2.64711	3.62305
199	0.710937	-2.42699	3.84886
200	0.814113	-2.34234	3.97057
201	0.815958	-2.36134	3.99325
202	0.686438	-2.51	3.88287
203	0.412346	-2.79189	3.61658
204	-0.00036628	-3.20646	3.20573
205	-0.468947	-3.66836	2.73046
206	-1.04476	-4.22629	2.13676
207	-1.65919	-4.8196	1.50122
208	-2.3008	-5.43766	0.836058
209	-2.96163	-6.07779	0.154521
210	-3.50308	-6.60705	-0.399117
211	-3.87159	-6.96641	-0.776771
212	-4.11378	-7.19278	-1.03478
213	-4.13372	-7.18014	-1.08731
214	-3.98498	-6.99627	-0.973685
215	-3.63939	-6.62081	-0.657969
216	-3.12811	-6.1121	-0.144135
217	-2.48504	-5.51579	0.545708
218	-1.79285	-4.90587	1.32016
219	-1.0793	-4.27773	2.11912
220	-0.400182	-3.66518	2.86482
221	0.0614472	-3.23496	3.35786
222	0.300365	-2.98139	3.58212
223	0.353192	-2.88395	3.59034
224	0.22133	-2.97004	3.4127
225	-0.129997	-3.29071	3.03072
226	-0.651635	-3.80418	2.50091
227	-1.27987	-4.43738	1.87764
228	-1.87766	-5.03494	1.27961
229	-2.39277	-5.53934	0.753798
230	-2.67089	-5.79851	0.456741
231	-2.65495	-5.76205	0.45215
232	-2.3977	-5.49364	0.698236
233	-1.88525	-4.97864	1.20813
234	-1.18064	-4.28254	1.92126
235	-0.405267	-3.5227	2.71216
236	0.356196	-2.7757	3.48809
237	0.993455	-2.15364	4.14055
238	1.29201	-1.86662	4.45065
239	1.3038	-1.86055	4.46815
240	1.06892	-2.09169	4.22954
241	0.573053	-2.56832	3.71443
242	-0.0143513	-3.12873	3.10003
243	-0.639101	-3.71906	2.44086
244	-1.0991	-4.13647	1.93827
245	-1.31522	-4.30644	1.67601
246	-1.25535	-4.20649	1.69579
247	-1.0661	-4.00004	1.86785
248	-0.726179	-3.68583	2.23347
249	-0.354017	-3.3821	2.67406
250	-0.119489	-3.2342	2.99522
251	-0.118534	-3.3044	3.06733
252	-0.302823	-3.5181	2.91246
253	-0.654718	-3.83512	2.52568
254	-1.09952	-4.20153	2.00249
255	-1.53804	-4.56342	1.48734
256	-1.95901	-4.95112	1.03309
257	-2.21875	-5.25182	0.814328
258	-2.28428	-5.40494	0.836385
259	-2.22548	-5.44176	0.990795
260	-2.02637	-5.30624	1.25349
261	-1.85453	-5.1433	1.43423
262	-1.60824	-4.8592	1.64272
263	-1.38439	-4.57397	1.80518
264	-1.23537	-4.37866	1.90793
265	-1.10617	-4.23992	2.02758
266	-0.892132	-4.04834	2.26408
267	-0.740281	-3.92793	2.44736
268	-0.646491	-3.8451	2.55212
269	-0.503955	-3.68193	2.67402
270	-0.389459	-3.52392	2.74501
271	-0.256287	-3.34386	2.83128
272	-0.191517	-3.25504	2.87201
273	-0.110868	-3.17246	2.95073
274	-0.00729325	-3.07241	3.05782
275	0.144898	-2.91323	3.20302
276	0.309225	-2.71778	3.33623
277	0.59966	-2.38184	3.58116
278	0.992463	-1.95455	3.93947
279	1.47989	-1.46058	4.42036
280	2.03563	-0.932137	5.00339
281	2.7007	-0.315917	5.71732
282	3.42888	0.359839	6.49791
283	4.17168	1.05728	7.28608
284	4.87573	1.71818	8.03327
285	5.35859	2.16399	8.55319
286	5.60268	2.3857	8.81965
287	5.60702	2.3908	8.82323
288	5.28956	2.09983	8.4793
289	4.70015	1.55727	7.84303
290	3.88567	0.787104	6.98424
291	3.07829	-0.0156988	6.17228
292	2.38894	-0.744998	5.52287
293	1.89683	-1.29025	5.08391
294	1.68572	-1.54215	4.91359
295	1.81387	-1.41634	5.04408
296	2.16598	-1.01742	5.34939
297	2.60688	-0.51086	5.72463
298	2.99956	-0.0691708	6.0683
299	3.23088	0.17493	6.28683
300	3.21892	0.145417	6.29242
301	2.80749	-0.287145	5.90212
302	2.20832	-0.901061	5.31771
303	1.46548	-1.6419	4.57287
304	0.694049	-2.40703	3.79513
305	0.099527	-2.99334	3.19239
306	-0.151569	-3.22926	2.92612
307	-0.0410505	-3.10567	3.02357
308	0.428082	-2.62815	3.48431
309	1.22847	-1.83436	4.29131
310	2.18925	-0.894787	5.27329
311	3.12441	0.0119012	6.23691
312	3.87485	0.745199	7.0045
313	4.31165	1.18856	7.43473
314	4.36203	1.25982	7.46425
315	4.06612	0.978202	7.15403
316	3.48148	0.385528	6.57744
317	2.73445	-0.397711	5.8666
318	2.01337	-1.16542	5.19216
319	1.32267	-1.89397	4.53931
320	0.806809	-2.42086	4.03448
321	0.556833	-2.64818	3.76185
322	0.580495	-2.5831	3.74409
323	0.705639	-2.40454	3.81582
324	0.945445	-2.11446	4.00535
325	1.14656	-1.88152	4.17463
326	1.40278	-1.62558	4.43113
327	1.69172	-1.37481	4.75825
328	1.96457	-1.16639	5.09553
329	2.33144	-0.860405	5.52329
330	2.72426	-0.503392	5.95191
331	3.3143	0.0980658	6.53054
332	4.03616	0.873483	7.19884
333	4.79741	1.70637	7.88844
334	5.53292	2.49801	8.56783
335	6.1921	3.17221	9.212
336	6.65888	3.60103	9.71673
337	6.81657	3.69369	9.93945
338	6.75631	3.56699	9.94563
339	6.43457	3.19607	9.67306
340	5.81096	2.55666	9.06526
341	4.97488	1.74511	8.20465
342	4.01601	0.838237	7.19378
343	3.0121	-0.103219	6.12742
344	2.11764	-0.952114	5.18739
345	1.4014	-1.65954	4.46235
346	0.898122	-2.19333	3.98958
347	0.762136	-2.37559	3.89987
348	0.905859	-2.26923	4.08095
349	1.27564	-1.91281	4.4641
350	1.89277	-1.28705	5.07258

## Sheet: Panel_F
time	vEyeVel350_Mean	vEyeVel350_95ci_low	vEyeVel350_95ci_up
-100	13.5048	8.02709	18.9826
-99	13.8514	8.54181	19.161
-98	14.0346	8.94865	19.1205
-97	14.0458	9.20211	18.8895
-96	13.7747	9.18355	18.3658
-95	13.1441	8.79186	17.4964
-94	12.2774	8.12797	16.4268
-93	11.2914	7.27184	15.3109
-92	10.2155	6.235	14.1959
-91	9.22696	5.18285	13.2711
-90	8.51815	4.35157	12.6847
-89	8.05477	3.77424	12.3353
-88	7.91603	3.58577	12.2463
-87	7.99472	3.69152	12.2979
-86	8.10396	3.88077	12.3272
-85	8.26487	4.1015	12.4282
-84	8.38986	4.20519	12.5745
-83	8.36658	4.07515	12.658
-82	8.2556	3.82309	12.6881
-81	8.0513	3.49313	12.6095
-80	7.95057	3.33638	12.5648
-79	7.97359	3.38217	12.565
-78	8.15093	3.63089	12.671
-77	8.40494	3.97856	12.8313
-76	8.73185	4.37797	13.0857
-75	9.05148	4.74894	13.354
-74	9.37152	5.10348	13.6396
-73	9.44942	5.22209	13.6767
-72	9.44492	5.27452	13.6153
-71	9.31415	5.18441	13.4439
-70	9.081	4.96106	13.201
-69	8.73596	4.6026	12.8693
-68	8.49726	4.32987	12.6647
-67	8.18015	3.97856	12.3817
-66	7.78469	3.57523	11.9941
-65	7.31907	3.14382	11.4943
-64	6.8022	2.68347	10.9209
-63	6.25692	2.1821	10.3317
-62	5.66191	1.59846	9.72536
-61	5.19738	1.10533	9.28943
-60	4.98731	0.82867	9.14594
-59	4.97719	0.742042	9.21235
-58	5.31291	1.01615	9.60966
-57	5.85077	1.50237	10.1992
-56	6.64471	2.25602	11.0334
-55	7.55883	3.15672	11.9609
-54	8.41849	4.05229	12.7847
-53	9.17362	4.90711	13.4401
-52	9.65248	5.52049	13.7845
-51	9.89174	5.86111	13.9224
-50	9.91166	5.88273	13.9406
-49	9.57004	5.43449	13.7056
-48	9.11362	4.81777	13.4095
-47	8.58728	4.1449	13.0297
-46	8.09629	3.5745	12.6181
-45	7.70867	3.1986	12.2187
-44	7.41232	2.99068	11.834
-43	7.28101	2.98139	11.5806
-42	7.31176	3.12958	11.4939
-41	7.50689	3.40253	11.6113
-40	7.75481	3.6599	11.8497
-39	7.98389	3.81675	12.151
-38	8.20398	3.9043	12.5037
-37	8.29932	3.85875	12.7399
-36	8.19164	3.65659	12.7267
-35	8.00352	3.4585	12.5485
-34	7.7363	3.25452	12.2181
-33	7.30659	2.92836	11.6848
-32	6.811	2.52496	11.097
-31	6.39846	2.16157	10.6354
-30	5.92881	1.69563	10.162
-29	5.52576	1.24996	9.80156
-28	5.12672	0.786038	9.4674
-27	4.87428	0.468372	9.28019
-26	4.64781	0.204829	9.09079
-25	4.40763	-0.0514135	8.86667
-24	4.3312	-0.117625	8.78002
-23	4.30653	-0.112887	8.72594
-22	4.34752	-0.0423122	8.73735
-21	4.49372	0.0999768	8.88747
-20	4.58792	0.152262	9.02357
-19	4.67741	0.178935	9.17589
-18	4.72658	0.170619	9.28254
-17	4.64016	0.0660689	9.21426
-16	4.32636	-0.220203	8.87293
-15	4.00408	-0.456216	8.46438
-14	3.69354	-0.651767	8.03884
-13	3.3754	-0.849501	7.60031
-12	3.22388	-0.902721	7.35049
-11	3.38086	-0.686693	7.44841
-10	3.71559	-0.342618	7.7738
-9	4.43027	0.365563	8.49497
-8	5.291	1.1986	9.3834
-7	6.24714	2.11036	10.3839
-6	7.15799	2.98609	11.3299
-5	7.88181	3.68421	12.0794
-4	8.36457	4.14835	12.5808
-3	8.54223	4.32525	12.7592
-2	8.6529	4.45703	12.8488
-1	8.6795	4.50321	12.8558
0	8.71043	4.56368	12.8572
1	8.79906	4.67351	12.9246
2	9.02454	4.90579	13.1433
3	9.33564	5.23055	13.4407
4	9.49537	5.40815	13.5826
5	9.49278	5.42014	13.5654
6	9.14727	5.09002	13.2045
7	8.42292	4.37985	12.466
8	7.23352	3.19247	11.2746
9	5.86803	1.81465	9.92141
10	4.4398	0.362932	8.51666
11	3.11635	-0.977937	7.21065
12	2.15197	-1.93422	6.23816
13	1.61177	-2.4587	5.68223
14	1.68015	-2.37409	5.73438
15	2.24333	-1.79281	6.27947
16	3.10647	-0.920743	7.13369
17	4.15586	0.137253	8.17447
18	5.20413	1.22178	9.18648
19	6.13061	2.21302	10.0482
20	6.82259	2.99128	10.6539
21	7.19802	3.43551	10.9605
22	7.3715	3.62019	11.1228
23	7.38371	3.58072	11.1867
24	7.21421	3.30085	11.1276
25	7.02289	2.97538	11.0704
26	6.81529	2.66873	10.9619
27	6.62845	2.42635	10.8306
28	6.36418	2.16996	10.5584
29	6.03981	1.88915	10.1905
30	5.65565	1.54571	9.76559
31	5.24047	1.14512	9.33581
32	4.88923	0.768978	9.00948
33	4.54662	0.375316	8.71792
34	4.23192	0.00875481	8.45508
35	3.95445	-0.297328	8.20624
36	3.72891	-0.521048	7.97886
37	3.51937	-0.713651	7.75239
38	3.40948	-0.798732	7.6177
39	3.42266	-0.747255	7.59257
40	3.46599	-0.647584	7.57956
41	3.64249	-0.408428	7.69341
42	3.98466	-0.0164442	7.98576
43	4.34564	0.371149	8.32012
44	4.72656	0.751664	8.70146
45	5.20394	1.21457	9.1933
46	5.68994	1.70722	9.67266
47	6.03569	2.0908	9.98058
48	6.24775	2.34212	10.1534
49	6.25932	2.39109	10.1276
50	6.12472	2.24343	10.006
51	5.72883	1.76059	9.69708
52	4.98529	0.884119	9.08647
53	3.75096	-0.484733	7.98664
54	2.05072	-2.2951	6.39654
55	-0.31233	-4.72847	4.10381
56	-3.37255	-7.83299	1.08789
57	-7.21743	-11.7235	-2.71134
58	-11.732	-16.3093	-7.15465
59	-16.6429	-21.3319	-11.9539
60	-21.6868	-26.534	-16.8395
61	-26.4721	-31.4844	-21.4599
62	-30.5966	-35.738	-25.4552
63	-33.509	-38.7194	-28.2986
64	-34.9266	-40.1222	-29.7309
65	-34.6779	-39.793	-29.5627
66	-32.5489	-37.5559	-27.5419
67	-28.5734	-33.4827	-23.6641
68	-23.1118	-27.9374	-18.2863
69	-16.5506	-21.3081	-11.7931
70	-9.29503	-14.0099	-4.58012
71	-1.65754	-6.35805	3.04297
72	5.82503	1.13999	10.5101
73	12.9685	8.30309	17.6339
74	19.6838	15.0764	24.2913
75	25.7935	21.2833	30.3037
76	31.2266	26.8312	35.622
77	35.9043	31.5899	40.2188
78	39.8928	35.5818	44.2038
79	43.2477	38.878	47.6174
80	45.7833	41.3325	50.2341
81	47.3473	42.8602	51.8344
82	48.002	43.555	52.4491
83	47.7757	43.4242	52.1273
84	46.737	42.4667	51.0072
85	45.1494	40.8955	49.4034
86	43.2655	38.9607	47.5703
87	41.3427	36.9632	45.7223
88	39.6642	35.2579	44.0705
89	38.3932	34.0531	42.7334
90	37.5809	33.3723	41.7894
91	37.1533	33.0762	41.2304
92	37.1166	33.1042	41.1291
93	37.1252	33.0837	41.1667
94	36.9787	32.8468	41.1106
95	36.5542	32.3375	40.7709
96	35.7569	31.5065	40.0073
97	34.5426	30.3482	38.737
98	32.8896	28.808	36.9712
99	30.9026	26.9657	34.8396
100	28.8205	25.0254	32.6157
101	26.7552	23.0461	30.4643
102	24.8529	21.1404	28.5655
103	23.2686	19.4775	27.0597
104	22.0128	18.1126	25.913
105	21.1483	17.1499	25.1467
106	20.7439	16.6713	24.8165
107	20.7557	16.6171	24.8944
108	21.3014	17.0802	25.5226
109	22.3067	17.9979	26.6155
110	23.5098	19.1593	27.8602
111	25.1054	20.7739	29.4369
112	26.8504	22.612	31.0888
113	28.6512	24.5448	32.7577
114	30.3353	26.3368	34.3339
115	31.7525	27.7787	35.7263
116	32.8384	28.8105	36.8662
117	33.5084	29.3977	37.6191
118	33.7238	29.5458	37.9017
119	33.5405	29.3433	37.7377
120	33.1053	28.9343	37.2763
121	32.5245	28.4005	36.6485
122	31.8363	27.7854	35.8872
123	31.1967	27.2279	35.1655
124	30.6925	26.8058	34.5793
125	30.3355	26.4924	34.1786
126	30.1475	26.294	34.001
127	30.1108	26.1698	34.0519
128	30.2255	26.1334	34.3176
129	30.4032	26.1806	34.6258
130	30.6667	26.3764	34.957
131	30.9801	26.7312	35.2289
132	31.2822	27.1448	35.4196
133	31.4395	27.4269	35.4522
134	31.37	27.419	35.3211
135	31.0262	27.0335	35.0188
136	30.3681	26.278	34.4582
137	29.2927	25.1243	33.461
138	27.9634	23.7927	32.1342
139	26.207	22.1078	30.3063
140	24.3324	20.3135	28.3512
141	22.5037	18.5151	26.4923
142	20.8904	16.8769	24.9039
143	19.6193	15.544	23.6947
144	18.7631	14.6542	22.872
145	18.4173	14.3274	22.5073
146	18.5193	14.4999	22.5386
147	18.8726	14.9448	22.8004
148	19.3502	15.4803	23.22
149	19.8667	15.9985	23.7349
150	20.2676	16.3615	24.1737
151	20.4336	16.4932	24.374
152	20.4529	16.5046	24.4012
153	20.1803	16.2444	24.1161
154	19.7451	15.8144	23.6758
155	19.2279	15.2701	23.1858
156	18.6611	14.6623	22.6599
157	18.1348	14.1137	22.156
158	17.664	13.6623	21.6657
159	17.3536	13.4019	21.3053
160	17.2954	13.4005	21.1902
161	17.3487	13.4786	21.2188
162	17.4877	13.596	21.3795
163	17.7175	13.7843	21.6507
164	17.7559	13.7749	21.7369
165	17.7516	13.738	21.7651
166	17.4301	13.3829	21.4773
167	16.9088	12.8347	20.9829
168	16.1163	12.0375	20.195
169	15.1696	11.1124	19.2269
170	14.1264	10.0962	18.1566
171	13.157	9.14715	17.1668
172	12.2235	8.1892	16.2577
173	11.4689	7.36421	15.5735
174	10.9	6.7127	15.0873
175	10.4821	6.22924	14.7349
176	10.1028	5.83071	14.3748
177	9.78506	5.55136	14.0187
178	9.60274	5.42866	13.7768
179	9.50194	5.38089	13.623
180	9.33142	5.23494	13.4279
181	9.31308	5.20013	13.426
182	9.35336	5.20472	13.502
183	9.40417	5.22203	13.5863
184	9.51937	5.32919	13.7095
185	9.66751	5.5042	13.8308
186	9.76895	5.64881	13.8891
187	9.80879	5.73447	13.8831
188	9.71643	5.66658	13.7663
189	9.57	5.53597	13.604
190	9.29882	5.29695	13.3007
191	8.86909	4.91255	12.8256
192	8.40116	4.48477	12.3175
193	7.75904	3.86622	11.6519
194	7.16074	3.25532	11.0662
195	6.48609	2.53782	10.4344
196	5.87976	1.88616	9.87335
197	5.35972	1.33437	9.38507
198	4.88269	0.855502	8.90987
199	4.43725	0.41781	8.45668
200	4.15233	0.137884	8.16678
201	3.84082	-0.151974	7.83361
202	3.6142	-0.340576	7.56898
203	3.35909	-0.583462	7.30165
204	3.03733	-0.93247	7.00713
205	2.55626	-1.4768	6.58931
206	2.08113	-2.03316	6.19542
207	1.62641	-2.55537	5.80819
208	1.28454	-2.93939	5.50847
209	1.06619	-3.17144	5.30382
210	1.09713	-3.13778	5.33204
211	1.38715	-2.8241	5.59839
212	1.91861	-2.24603	6.08324
213	2.57735	-1.51841	6.67311
214	3.32041	-0.720317	7.36113
215	3.834	-0.173972	7.84198
216	4.13501	0.1246	8.14541
217	3.97252	-0.0796824	8.02472
218	3.3293	-0.799112	7.45771
219	2.31584	-1.89642	6.52809
220	1.0084	-3.28453	5.30132
221	-0.457718	-4.79554	3.8801
222	-1.96853	-6.2956	2.35854
223	-3.09495	-7.37536	1.18546
224	-3.82673	-8.0434	0.38994
225	-4.06666	-8.25671	0.123398
226	-3.81238	-8.01197	0.387205
227	-3.16115	-7.39546	1.07317
228	-2.24532	-6.50792	2.01729
229	-1.24298	-5.49059	3.00464
230	-0.341982	-4.53858	3.85462
231	0.494026	-3.65828	4.64634
232	1.05456	-3.08906	5.19817
233	1.41338	-2.7747	5.60146
234	1.54125	-2.71331	5.79581
235	1.59088	-2.70921	5.89098
236	1.54551	-2.76214	5.85315
237	1.34603	-2.95513	5.64718
238	1.01522	-3.29717	5.32761
239	0.48674	-3.85563	4.82911
240	-0.245524	-4.60521	4.11416
241	-1.21631	-5.532	3.09938
242	-2.3216	-6.53819	1.89499
243	-3.35579	-7.44864	0.73706
244	-4.20439	-8.21006	-0.198723
245	-4.72306	-8.7334	-0.712723
246	-4.75146	-8.81843	-0.684495
247	-4.18854	-8.30172	-0.0753627
248	-3.15919	-7.27864	0.960265
249	-1.76416	-5.86588	2.33756
250	-0.181689	-4.3126	3.94923
251	1.23568	-3.00485	5.47621
252	2.41307	-1.97918	6.80532
253	2.96556	-1.55721	7.48834
254	2.98254	-1.58108	7.54615
255	2.34265	-2.16621	6.8515
256	1.18905	-3.2068	5.5849
257	-0.248834	-4.54421	4.04655
258	-1.82425	-6.06414	2.41564
259	-3.30274	-7.51959	0.914097
260	-4.3962	-8.60265	-0.189737
261	-5.12215	-9.3152	-0.929108
262	-5.36347	-9.54579	-1.18115
263	-5.07349	-9.25715	-0.889838
264	-4.4666	-8.65455	-0.27865
265	-3.58111	-7.77439	0.612178
266	-2.66644	-6.88272	1.54984
267	-1.81955	-6.096	2.45689
268	-1.18255	-5.57689	3.21179
269	-0.732278	-5.25536	3.7908
270	-0.519038	-5.13448	4.09641
271	-0.39065	-4.99857	4.21727
272	-0.358707	-4.84787	4.13046
273	-0.236027	-4.55387	4.08182
274	-0.13244	-4.31992	4.05504
275	-0.0529771	-4.22551	4.11955
276	0.10005	-4.16614	4.36624
277	0.0717111	-4.30397	4.44739
278	-0.190444	-4.63013	4.24924
279	-0.647972	-5.06219	3.76624
280	-1.40889	-5.74038	2.9226
281	-2.30933	-6.56718	1.94853
282	-3.42129	-7.65361	0.811023
283	-4.39994	-8.67333	-0.12655
284	-5.27699	-9.64625	-0.907739
285	-5.88173	-10.3727	-1.39075
286	-6.20773	-10.8068	-1.60868
287	-6.24702	-10.9252	-1.56885
288	-6.0339	-10.7382	-1.32958
289	-5.72614	-10.395	-1.05726
290	-5.33362	-9.92854	-0.738699
291	-4.87144	-9.36201	-0.380881
292	-4.25681	-8.6409	0.12727
293	-3.60625	-7.9146	0.7021
294	-2.91547	-7.1741	1.34316
295	-2.13271	-6.40661	2.14119
296	-1.28512	-5.6417	3.07145
297	-0.543631	-5.02723	3.93997
298	-0.0244202	-4.62442	4.57558
299	0.197429	-4.46795	4.86281
300	0.13353	-4.51647	4.78353
301	-0.310892	-4.88591	4.26413
302	-1.1639	-5.64942	3.32162
303	-2.33768	-6.76571	2.09035
304	-3.57216	-7.98161	0.837288
305	-4.64028	-9.0631	-0.217464
306	-5.48274	-9.90764	-1.05785
307	-6.0432	-10.4434	-1.64302
308	-6.04704	-10.4139	-1.68022
309	-5.686	-10.0116	-1.36043
310	-4.95171	-9.24935	-0.654065
311	-4.06548	-8.36147	0.230507
312	-3.02992	-7.36311	1.30327
313	-2.15697	-6.53698	2.22303
314	-1.37481	-5.78	3.03039
315	-0.833151	-5.21395	3.54765
316	-0.557479	-4.85908	3.74412
317	-0.503276	-4.71485	3.7083
318	-0.750151	-4.9051	3.4048
319	-1.03202	-5.18834	3.1243
320	-1.31203	-5.51052	2.88646
321	-1.55832	-5.80552	2.68887
322	-1.75392	-6.03647	2.52863
323	-1.9533	-6.25913	2.35252
324	-2.09874	-6.43533	2.23784
325	-2.27747	-6.65721	2.10227
326	-2.62536	-7.03646	1.78574
327	-3.1084	-7.52589	1.3091
328	-3.70041	-8.09608	0.695256
329	-4.35515	-8.73296	0.0226488
330	-4.89456	-9.28753	-0.501588
331	-5.35885	-9.81533	-0.902365
332	-5.70311	-10.253	-1.15326
333	-5.63921	-10.2584	-1.01998
334	-5.19083	-9.81547	-0.566192
335	-4.43181	-8.99923	0.135613
336	-3.68942	-8.19627	0.817433
337	-2.95863	-7.45634	1.53907
338	-2.37739	-6.94536	2.19059
339	-2.04862	-6.73228	2.63505
340	-2.11903	-6.90295	2.66488
341	-2.3626	-7.17255	2.44734
342	-2.69482	-7.44004	2.0504
343	-2.95666	-7.59808	1.68476
344	-3.06854	-7.61854	1.48146
345	-2.92809	-7.45988	1.6037
346	-2.44534	-7.03777	2.14709
347	-1.83794	-6.51852	2.84263
348	-1.10202	-5.85777	3.65372
349	-0.454605	-5.22816	4.31895
350	-0.147757	-4.89152	4.596

## Sheet: Panel_G
time_upto_minus50	vEyeVel_upto_minus50_Mean	time_upto_0	vEyeVel_upto_0_Mean	time_upto_plus50	vEyeVel_upto_plus50_Mean
-50	-7.97904	0	-3.69778	50	-10.7929
-49	-10.5531	1	-2.74561	51	-9.01423
-48	-12.4924	2	-1.07495	52	-7.13371
-47	-13.4005	3	0.917059	53	-5.50186
-46	-13.5028	4	2.65739	54	-4.31009
-45	-12.5236	5	3.8681	55	-3.76339
-44	-10.7149	6	4.21326	56	-3.74498
-43	-8.41497	7	3.41435	57	-4.05099
-42	-5.81139	8	1.74131	58	-4.5995
-41	-3.42374	9	-0.793619	59	-5.17887
-40	-1.55856	10	-3.81796	60	-5.45532
-39	-0.521606	11	-7.15823	61	-5.60918
-38	-0.353846	12	-9.93863	62	-5.52485
-37	-1.18352	13	-12.3859	63	-5.3888
-36	-2.77309	14	-14.0803	64	-5.34258
-35	-4.7869	15	-14.9643	65	-5.77086
-34	-7.15864	16	-15.3512	66	-6.51492
-33	-9.55303	17	-15.3377	67	-7.50932
-32	-11.4565	18	-14.9566	68	-8.91471
-31	-12.8142	19	-14.6392	69	-10.4602
-30	-13.7355	20	-14.3707	70	-11.8418
-29	-14.0701	21	-13.9612	71	-13.0379
-28	-13.7351	22	-13.6632	72	-13.7365
-27	-13.0446	23	-13.4003	73	-13.9253
-26	-12.0474	24	-13.3136	74	-13.4743
-25	-10.8635	25	-13.1398	75	-12.45
-24	-9.99807	26	-13.1668	76	-11.0789
-23	-9.41123	27	-13.0424	77	-9.49262
-22	-9.25726	28	-12.6365	78	-7.90306
-21	-9.61815	29	-12.231	79	-6.29519
-20	-10.3761	30	-11.4889	80	-4.9981
-19	-11.4814	31	-10.2445	81	-3.97769
-18	-12.6515	32	-8.58522	82	-3.49188
-17	-13.7742	33	-6.99285	83	-3.2807
-16	-14.3057	34	-5.28345	84	-3.15372
-15	-14.2353	35	-3.84572	85	-2.85408
-14	-13.5364	36	-2.81079	86	-2.15483
-13	-12.2731	37	-2.30187	87	-0.694198
-12	-10.4849	38	-2.34703	88	1.57272
-11	-8.54694	39	-2.80741	89	4.776
-10	-6.7632	40	-3.42696	90	8.49257
-9	-5.37301	41	-3.73122	91	12.6484
-8	-4.61122	42	-3.76155	92	16.4808
-7	-4.49688	43	-3.30635	93	19.7551
-6	-4.90025	44	-2.22858	94	22.0935
-5	-5.48104	45	-1.08342	95	23.3112
-4	-6.3567	46	-0.369272	96	23.3492
-3	-6.94666	47	0.00546542	97	22.3253
-2	-6.96127	48	-0.341713	98	20.3535
-1	-6.61332	49	-1.56961	99	18.1049
0	-5.8976	50	-3.18828	100	15.8583
1	-4.80133	51	-5.26067	101	13.9234
2	-3.70538	52	-7.32669	102	12.6025
3	-2.72151	53	-9.12079	103	12.0488
4	-1.91363	54	-10.0592	104	12.3671
5	-1.48691	55	-10.5373	105	13.3791
6	-1.48387	56	-10.1307	106	14.997
7	-1.7391	57	-8.97316	107	17.1513
8	-2.17209	58	-7.36415	108	19.3035
9	-2.71561	59	-5.40334	109	21.3947
10	-3.09439	60	-3.42024	110	23.1577
11	-3.21457	61	-1.28951	111	24.2295
12	-3.08269	62	0.61246	112	24.8029
13	-2.75556	63	2.49301	113	24.6691
14	-2.37056	64	3.97206	114	24.1564
15	-1.82284	65	5.14029	115	23.2022
16	-1.3633	66	5.77694	116	22.1806
17	-0.899725	67	5.8888	117	21.1672
18	-0.368259	68	5.38871	118	20.5145
19	0.116286	69	4.44944	119	19.9838
20	0.569504	70	3.03895	120	19.7998
21	1.122	71	1.52908	121	19.8159
22	1.71195	72	-0.0523404	122	19.8845
23	2.10936	73	-1.44038	123	19.9345
24	2.53094	74	-2.44991	124	19.8177
25	2.80834	75	-3.13363	125	19.5857
26	2.73101	76	-3.36454	126	19.2276
27	2.41487	77	-3.01417	127	18.7533
28	1.95467	78	-2.30377	128	18.1376
29	1.36258	79	-0.985713	129	17.4736
30	0.967016	80	0.636824	130	16.5646
31	0.64594	81	2.50715	131	15.3809
32	0.583598	82	4.56223	132	13.8486
33	0.898122	83	6.90306	133	12.0621
34	1.64168	84	9.26476	134	10.2592
35	2.46412	85	11.5236	135	8.61399
36	3.3895	86	13.6165	136	7.68119
37	4.42209	87	15.7532	137	7.16581
38	5.19945	88	17.8128	138	7.54993
39	5.63956	89	19.5275	139	8.64049
40	5.98603	90	21.17	140	10.2907
41	5.97135	91	22.6916	141	12.1106
42	5.4673	92	24.2334	142	13.5973
43	4.66482	93	25.5749	143	14.6023
44	3.55457	94	26.5505	144	14.916
45	2.15883	95	27.0757	145	14.6979
46	0.439953	96	27.4552	146	13.9084
47	-1.31715	97	27.5284	147	13.1965
48	-3.28126	98	27.3512	148	12.4413
49	-5.18329	99	27.1423	149	11.9792
50	-6.57877	100	27.2883	150	11.9898
51	-7.26991	101	27.759	151	12.2917
52	-7.27098	102	28.4653	152	12.8128
53	-6.33319	103	29.5145	153	13.1138
54	-4.39279	104	30.7041	154	13.0037
55	-2.12562	105	31.8876	155	12.4354
56	0.217252	106	33.1278	156	11.2916
57	2.33251	107	34.0149	157	9.63756
58	3.84672	108	34.625	158	7.66659
59	4.49542	109	34.9431	159	5.79446
60	3.98566	110	34.8739	160	4.1319
61	2.46598	111	34.3045	161	2.78212
62	0.424465	112	33.3373	162	2.08961
63	-1.7024	113	31.8628	163	2.15184
64	-3.81666	114	29.9732	164	2.88598
65	-5.66845	115	27.7607	165	4.20097
66	-6.67041	116	25.1935	166	5.75915
67	-6.97501	117	22.519	167	7.3475
68	-6.71535	118	20.1424	168	8.61647
69	-5.57322	119	18.3112	169	9.3587
70	-4.11814	120	17.0383	170	9.35759
71	-2.48069	121	16.509	171	8.46663
72	-0.560516	122	16.6238	172	6.7841
73	1.10355	123	16.9796	173	4.57684
74	2.56496	124	17.3241	174	2.3447
75	3.62078	125	17.5366	175	0.350313
76	4.33009	126	17.3773	176	-0.876342
77	4.7006	127	16.9038	177	-1.36977
78	4.62272	128	16.0573	178	-1.03987
79	4.39534	129	15.0756	179	0.0299513
80	4.12581	130	14.2822	180	1.40992
81	4.05732	131	13.899	181	3.15624
82	4.26815	132	14.0359	182	4.77154
83	4.98098	133	14.5763	183	5.84804
84	6.18039	134	15.4491	184	6.7481
85	7.87741	135	16.4996	185	7.30993
86	10.0126	136	17.3914	186	7.77825
87	12.5812	137	17.7515	187	7.97029
88	15.1933	138	17.4915	188	8.02524
89	17.5371	139	16.9228	189	7.78018
90	19.5744	140	15.909	190	7.01334
91	21.4607	141	14.7442	191	5.70904
92	23.0899	142	13.6498	192	4.07848
93	24.4979	143	12.7215	193	1.92407
94	25.8129	144	12.1862	194	-0.339372
95	27.3125	145	11.7424	195	-2.255
96	29.2005	146	11.2246	196	-3.63615
97	31.4881	147	10.7314	197	-4.17027
98	34.2241	148	10.2872	198	-3.86862
99	36.8205	149	9.35994	199	-2.70441
100	39.3986	150	7.92855	200	-1.26717
101	41.6049	151	6.25439
102	43.0455	152	4.4379
103	43.5749	153	2.79914
104	43.0393	154	1.25622
105	41.5638	155	0.154482
106	39.3736	156	-0.228077
107	36.7378	157	-0.0100643
108	34.0886	158	0.649474
109	31.9035	159	1.86075
110	30.4907	160	3.50946
111	29.9921	161	5.27275
112	30.4316	162	6.67202
113	31.4222	163	7.6673
114	32.6813	164	7.95874
115	33.825	165	7.49109
116	34.572	166	6.45337
117	34.284	167	4.78905
118	33.1658	168	2.98677
119	31.2293	169	1.35655
120	28.9293	170	-0.049692
121	26.3093	171	-0.85433
122	23.9617	172	-1.01133
123	22.1381	173	-0.684087
124	20.828	174	0.0761001
125	20.1621	175	0.986281
126	19.9736	176	1.60892
127	20.0684	177	2.02479
128	20.0109	178	1.89018
129	19.7797	179	1.2363
130	19.1374	180	0.188394
131	18.1453	181	-0.825569
132	16.854	182	-1.80281
133	15.6086	183	-2.65521
134	14.5911	184	-3.10691
135	13.9865	185	-3.29544
136	13.8262	186	-3.29898
137	14.2503	187	-3.13719
138	15.2093	188	-2.81766
139	16.3773	189	-2.60074
140	17.6467	190	-2.60828
141	18.9015	191	-2.98725
142	19.5352	192	-3.55721
143	19.8342	193	-4.24373
144	19.7513	194	-5.02155
145	19.1873	195	-5.56225
146	18.2421	196	-5.69346
147	17.1436	197	-5.44087
148	15.8601	198	-4.66788
149	14.7391	199	-3.42195
150	13.7494	200	-1.8968
151	12.9803
152	12.5973
153	12.5343
154	12.8075
155	13.1516
156	13.7132
157	14.177
158	14.1962
159	13.8206
160	12.855
161	11.06
162	8.96536
163	6.62372
164	4.20651
165	2.0623
166	0.582558
167	-0.201227
168	-0.358558
169	0.185389
170	1.11688
171	1.96893
172	2.89844
173	3.69311
174	4.12645
175	4.4373
176	4.53894
177	4.66549
178	5.03505
179	5.575
180	5.98917
181	6.50666
182	6.73906
183	6.61774
184	5.82338
185	4.55068
186	2.71732
187	0.509833
188	-1.88394
189	-4.12105
190	-5.96655
191	-7.11648
192	-7.39297
193	-6.89492
194	-5.60311
195	-3.84795
196	-1.91176
197	-0.180653
198	0.946502
199	1.43275
200	0.985263

## Sheet: Panel_H
time_upto_minus50	vEyeVel_upto_minus50_Mean	time_upto_0	vEyeVel_upto_0_Mean	time_upto_plus50	vEyeVel_upto_plus50_Mean	time_after_plus175	vEyeVel_after_plus175_Mean	time_after_plus225	vEyeVel_after_plus225_Mean
-50	32.5574	0	29.2117	50	36.4399	-100	1.44022	-100	23.1418
-49	31.3213	1	28.8509	51	34.892	-99	2.58889	-99	22.3529
-48	30.7012	2	28.1807	52	33.9906	-98	4.72557	-98	20.7209
-47	30.4146	3	27.3485	53	33.3414	-97	7.86973	-97	18.136
-46	30.5428	4	26.3493	54	33.0614	-96	10.9548	-96	15.4473
-45	30.7885	5	25.1725	55	33.0856	-95	13.5609	-95	12.7463
-44	30.7902	6	23.7561	56	33.3002	-94	15.0461	-94	10.2681
-43	30.2899	7	22.1823	57	33.4618	-93	15.3683	-93	8.14067
-42	29.2105	8	20.5313	58	33.1552	-92	14.3586	-92	6.05576
-41	27.3692	9	18.7738	59	32.2516	-91	12.3001	-91	4.1745
-40	25.0753	10	17.2266	60	30.7389	-90	9.99637	-90	2.09708
-39	22.3671	11	16.0132	61	28.8855	-89	7.82522	-89	0.0960255
-38	19.699	12	15.3998	62	26.5777	-88	5.97077	-88	-1.86353
-37	17.2832	13	15.348	63	24.1723	-87	4.93155	-87	-3.61698
-36	15.2168	14	15.6383	64	22.1373	-86	5.04338	-86	-4.94772
-35	13.8169	15	16.0741	65	20.7301	-85	5.82651	-85	-5.67755
-34	13.0424	16	16.6434	66	20.086	-84	6.44258	-84	-5.49981
-33	12.9108	17	16.6767	67	20.4202	-83	7.19589	-83	-4.34064
-32	13.5523	18	16.06	68	21.6263	-82	7.46675	-82	-2.06352
-31	14.7896	19	14.8881	69	23.4545	-81	7.38673	-81	0.861176
-30	16.2517	20	13.3515	70	25.5545	-80	6.89928	-80	4.25771
-29	17.5047	21	11.6522	71	27.5886	-79	6.13196	-79	7.73625
-28	18.6274	22	9.98125	72	29.184	-78	6.04194	-78	10.9214
-27	19.3973	23	8.5423	73	30.3346	-77	6.75136	-77	13.2824
-26	19.4499	24	7.9704	74	30.8327	-76	8.85765	-76	14.6416
-25	19.0038	25	7.99967	75	30.6833	-75	12.4349	-75	14.7809
-24	17.9918	26	8.3603	76	30.3133	-74	17.2804	-74	14.0044
-23	16.6968	27	8.85674	77	29.9662	-73	22.6721	-73	12.6862
-22	15.4304	28	9.08461	78	30.0337	-72	27.6631	-72	10.6839
-21	14.2992	29	8.88001	79	30.8121	-71	31.9288	-71	8.75891
-20	13.7462	30	8.12243	80	32.0477	-70	34.6487	-70	6.84892
-19	13.7075	31	7.06586	81	34.102	-69	34.9036	-69	5.46589
-18	13.8842	32	5.95707	82	36.4718	-68	32.9005	-68	4.35948
-17	14.2856	33	5.00942	83	39.2144	-67	28.4891	-67	3.8589
-16	14.8232	34	4.66343	84	41.8635	-66	22.6832	-66	3.62917
-15	15.0512	35	4.95599	85	44.0636	-65	16.0644	-65	3.53804
-14	14.918	36	6.06787	86	45.3529	-64	9.89354	-64	3.4409
-13	14.5939	37	7.79605	87	45.5248	-63	4.5537	-63	3.12711
-12	13.957	38	9.74028	88	44.4668	-62	0.79316	-62	2.85127
-11	13.5202	39	11.698	89	42.2025	-61	-0.711974	-61	2.35985
-10	13.2037	40	13.1871	90	39.249	-60	-0.444258	-60	2.10825
-9	13.5177	41	13.9178	91	35.7285	-59	0.88068	-59	2.05292
-8	14.3299	42	13.9175	92	32.2815	-58	3.03988	-58	2.45859
-7	15.6068	43	13.1175	93	28.9226	-57	5.62404	-57	3.39814
-6	17.4644	44	11.9714	94	26.1381	-56	7.7373	-56	5.02163
-5	19.687	45	10.947	95	24.2659	-55	8.46763	-55	6.96979
-4	21.878	46	10.177	96	23.2277	-54	8.17579	-54	9.42566
-3	23.936	47	9.94756	97	22.8873	-53	7.16342	-53	12.0756
-2	25.3301	48	10.3286	98	23.0282	-52	5.17555	-52	14.6719
-1	25.8677	49	11.5771	99	23.4535	-51	3.07128	-51	16.6861
0	25.2341	50	13.1313	100	24.1528	-50	0.929824	-50	17.9032
1	23.4854	51	14.6844	101	24.7183	-49	-0.176687	-49	17.9267
2	20.9043	52	15.8855	102	24.7678	-48	0.229562	-48	16.6513
3	17.6086	53	16.8049	103	24.7815	-47	2.36301	-47	14.2635
4	13.9127	54	17.1466	104	24.4365	-46	5.84313	-46	10.6617
5	10.2855	55	17.0563	105	23.8728	-45	10.6127	-45	6.46232
6	7.20476	56	16.737	106	23.1774	-44	15.7835	-44	2.1687
7	4.92204	57	16.3474	107	22.5103	-43	20.1614	-43	-1.99765
8	3.74881	58	16.2542	108	22.1292	-42	23.4007	-42	-5.13695
9	3.79363	59	16.4402	109	21.9034	-41	24.7215	-41	-7.06888
10	4.46022	60	17.2757	110	21.7854	-40	23.6492	-40	-7.7241
11	5.58377	61	18.3926	111	22.0411	-39	20.7242	-39	-6.97139
12	6.66361	62	19.61	112	22.6903	-38	16.1076	-38	-4.89115
13	7.63242	63	20.5741	113	23.5354	-37	11.3557	-37	-1.83307
14	7.85445	64	21.1033	114	24.2615	-36	7.091	-36	1.51759
15	7.12737	65	21.1998	115	24.7551	-35	3.85905	-35	4.81969
16	6.04167	66	20.7261	116	25.2525	-34	2.46169	-34	7.61176
17	4.46067	67	19.9044	117	25.5779	-33	3.11667	-33	9.66214
18	3.04897	68	18.9668	118	25.6519	-32	5.61951	-32	10.7441
19	1.82375	69	18.2041	119	25.5686	-31	9.18884	-31	10.8651
20	1.39269	70	17.6394	120	25.035	-30	13.0644	-30	10.181
21	1.64844	71	17.5513	121	24.4263	-29	16.3302	-29	8.77663
22	2.68103	72	17.7965	122	23.5429	-28	18.8655	-28	6.72256
23	4.11425	73	18.312	123	22.266	-27	20.1831	-27	4.40932
24	5.81641	74	19.0318	124	20.9853	-26	19.8394	-26	2.04763
25	7.36075	75	19.7028	125	19.6507	-25	18.144	-25	0.0862765
26	8.56717	76	20.438	126	18.2459	-24	15.6935	-24	-1.57604
27	9.01225	77	20.9814	127	16.9859	-23	12.5791	-23	-2.52206
28	8.74168	78	21.836	128	15.7967	-22	9.46104	-22	-2.7002
29	7.96729	79	22.8384	129	14.8578	-21	6.51139	-21	-2.20101
30	6.65662	80	23.7556	130	14.3817	-20	4.50539	-20	-0.9906
31	5.29132	81	24.6865	131	13.9218	-19	3.26446	-19	0.555786
32	3.94737	82	25.3942	132	13.9547	-18	3.05983	-18	2.67461
33	3.08949	83	25.6712	133	14.4455	-17	3.25131	-17	4.87517
34	2.68301	84	25.5733	134	14.9514	-16	4.24039	-16	7.01556
35	3.0312	85	25.0348	135	15.4931	-15	5.22824	-15	8.8381
36	3.69938	86	24.0979	136	15.9878	-14	6.08491	-14	10.1898
37	4.80485	87	23.1044	137	16.3049	-13	6.68751	-13	11.2142
38	6.2051	88	22.4969	138	16.5263	-12	7.2056	-12	11.8983
39	7.07749	89	22.6285	139	16.4658	-11	7.44633	-11	11.9718
40	7.80444	90	23.4196	140	16.2809	-10	7.78055	-10	11.6611
41	8.04791	91	25.0924	141	16.0362	-9	8.33488	-9	11.0931
42	8.06777	92	27.4971	142	15.7316	-8	8.95946	-8	10.1636
43	7.73441	93	30.2364	143	15.5082	-7	10.3033	-7	8.87438
44	7.19224	94	32.9819	144	15.3256	-6	11.5568	-6	7.35645
45	6.58629	95	35.197	145	15.2387	-5	13.0425	-5	5.79769
46	6.06269	96	36.6546	146	15.3859	-4	14.656	-4	4.5435
47	5.77547	97	37.1376	147	15.6547	-3	15.4284	-3	3.71635
48	5.79198	98	36.5332	148	15.9758	-2	15.3168	-2	3.4754
49	6.11617	99	34.6991	149	16.025	-1	14.2892	-1	3.93891
50	6.74065	100	31.9713	150	16.0107	0	11.9827	0	4.90994
51	7.75128	101	28.4283	151	15.895	1	9.15561	1	6.15075
52	8.93423	102	24.651	152	15.5532	2	5.79858	2	7.43824
53	10.456	103	20.7519	153	14.8786	3	2.25061	3	8.54666
54	12.1927	104	17.1248	154	13.8735	4	-0.83317	4	9.25741
55	14.2573	105	14.1397	155	12.5499	5	-3.73	5	9.16957
56	16.233	106	12.0157	156	11.0103	6	-5.19837	6	8.41188
57	18.0622	107	10.9744	157	9.15131	7	-5.51224	7	7.07992
58	19.7631	108	11.0242	158	7.07703	8	-4.65382	8	5.23112
59	20.9866	109	11.9615	159	5.18249	9	-2.62569	9	3.40721
60	21.7015	110	13.4915	160	3.54435	10	0.0812822	10	1.50995
61	21.9476	111	15.2348	161	2.34933	11	3.24275	11	-0.0810703
62	21.9889	112	16.719	162	1.94941	12	6.16423	12	-1.05058
63	21.4006	113	17.6247	163	2.14877	13	8.88219	13	-1.421
64	20.8154	114	17.8359	164	2.96226	14	10.4959	14	-1.1092
65	19.9028	115	17.2982	165	4.3424	15	11.271	15	-0.452452
66	18.9862	116	16.0495	166	5.89244	16	11.427	16	0.654498
67	18.2411	117	14.5189	167	7.36468	17	11.4358	17	2.29686
68	17.4414	118	12.8304	168	8.60977	18	11.3827	18	3.97307
69	17.1937	119	11.3325	169	9.29359	19	11.761	19	5.53105
70	17.2673	120	10.4665	170	9.37409	20	12.904	20	6.74645
71	17.8575	121	10.6191	171	8.80158	21	14.3997	21	7.13649
72	18.8483	122	11.575	172	7.96014	22	16.3945	22	7.05047
73	20.5079	123	13.3906	173	6.87243	23	18.5122	23	6.37992
74	22.6319	124	15.8339	174	5.62717	24	20.2413	24	5.16701
75	24.9208	125	18.7123	175	4.647	25	21.6432	25	3.9595
76	27.1592	126	21.7613	176	4.0451	26	21.36	26	2.87336
77	29.0615	127	24.5805	177	3.71759	27	19.7461	27	2.13187
78	30.4726	128	26.7447	178	3.49936	28	17.2462	28	2.07976
79	31.0318	129	27.9833	179	3.38369	29	13.4766	29	2.69375
80	30.8688	130	28.0323	180	3.46064	30	9.33312	30	3.73419
81	30.2296	131	27.0439	181	3.69217	31	4.55953	31	5.06837
82	29.2662	132	24.8989	182	3.87992	32	-0.00932578	32	6.30098
83	28.0974	133	21.9755	183	4.06377	33	-4.05371	33	7.06699
84	27.1622	134	18.5926	184	4.33813	34	-7.62369	34	7.15733
85	26.4342	135	15.3549	185	4.54764	35	-9.61259	35	6.41669
86	26.2296	136	12.4862	186	4.78841	36	-10.1393	36	4.87277
87	26.6225	137	10.3231	187	5.03965	37	-9.13426	37	2.92042
88	27.1585	138	9.18625	188	5.19799	38	-6.65789	38	0.821179
89	27.8734	139	8.91958	189	5.24417	39	-2.98901	39	-1.03718
90	28.6641	140	9.29568	190	5.03664	40	1.65316	40	-2.22837
91	29.288	141	10.0624	191	4.80847	41	6.83083	41	-2.46583
92	29.5172	142	10.7781	192	4.3926	42	11.5068	42	-1.62521
93	29.4428	143	11.3846	193	4.01318	43	15.3293	43	0.489002
94	28.9299	144	11.5719	194	3.67675	44	17.6343	44	3.32917
95	28.4454	145	11.3994	195	3.50828	45	18.7663	45	6.54034
96	27.6913	146	10.9211	196	3.59097	46	18.3352	46	9.76684
97	26.8636	147	10.0816	197	3.82653	47	16.3661	47	12.5347
98	26.3099	148	9.4794	198	4.34724	48	13.7557	48	14.4802
99	25.4504	149	8.83108	199	5.07291	49	11.0274	49	15.3635
100	24.4981	150	8.4565	200	6.01745	50	8.61761	50	14.9998
101	23.2703	151	8.12217			51	7.19527	51	13.9435
102	21.8131	152	7.63987			52	7.062	52	12.5125
103	20.2907	153	6.90444			53	8.08276	53	10.8732
104	18.6361	154	5.90866			54	10.6274	54	9.48368
105	17.2957	155	4.81176			55	13.5794	55	8.64296
106	16.3806	156	3.53638			56	16.6523	56	8.65021
107	16.2402	157	2.31716			57	19.1104	57	9.3967
108	16.6633	158	1.45062			58	20.8037	58	10.764
109	17.7103	159	1.24789			59	21.4923	59	12.6187
110	19.3013	160	1.86464			60	20.8225	60	14.5445
111	20.9792	161	3.21672			61	19.8362	61	16.3397
112	22.1796	162	5.44902			62	18.887	62	17.604
113	23.104	163	7.97744			63	18.4145	63	18.7047
114	23.6057	164	10.5261			64	19.3184	64	19.5065
115	23.782	165	12.6815			65	21.2358	65	20.1221
116	23.7874	166	13.9993			66	24.2136	66	20.9326
117	23.5957	167	14.271			67	27.6258	67	21.8414
118	23.3342	168	13.4439			68	30.4312	68	23.0745
119	23.1096	169	11.5243			69	32.0882	69	24.4981
120	22.5322	170	8.83714			70	32.2706	70	25.9888
121	21.749	171	5.90591			71	30.7726	71	27.1489
122	20.6678	172	3.16498			72	28.1095	72	28.124
123	18.8766	173	0.978034			73	25.1033	73	28.4612
124	16.6999	174	-0.19537			74	22.7676	74	27.9706
125	14.2433	175	-0.260809			75	21.9691	75	26.8656
126	12.0091	176	0.664245			76	22.9523	76	25.5809
127	10.4624	177	2.45831			77	26.0276	77	24.252
128	9.6435	178	4.51392			78	30.8885	78	23.185
129	10.0931	179	6.64079			79	36.1991	79	22.3984
130	11.8338	180	8.33017			80	41.299	80	22.281
131	14.4254	181	9.24883			81	44.9739	81	22.9629
132	17.4223	182	9.11827			82	46.8779	82	24.1485
133	20.5248	183	7.90054			83	46.6058	83	25.6282
134	23.2008	184	6.00327			84	44.749	84	27.2358
135	25.049	185	3.51486			85	42.0628	85	28.6607
136	25.6163	186	0.706602			86	38.6816	86	29.7979
137	24.8983	187	-1.67561			87	35.9	87	30.3263
138	23.0734	188	-3.452			88	34.1852	88	30.5881
139	20.564	189	-4.46901			89	32.9999	89	30.6297
140	17.6384	190	-4.74628			90	32.3423	90	30.4056
141	14.5382	191	-4.11262			91	31.5608	91	30.151
142	11.7368	192	-2.82818			92	30.2323	92	30.2328
143	9.80816	193	-1.06127			93	28.1625	93	30.3526
144	8.88632	194	1.06998			94	24.8187	94	30.4708
145	8.70941	195	3.52169			95	20.517	95	30.4666
146	9.57362	196	5.87119			96	16.6291	96	30.0542
147	11.1276	197	7.97649			97	13.4026	97	29.2016
148	13.2589	198	9.76369			98	11.0124	98	27.7257
149	15.2315	199	11.0608			99	10.5147	99	26.0294
150	16.9794	200	11.7069			100	12.1266	100	24.131
151	18.0383					101	15.3933	101	22.3682
152	17.9503					102	20.1008	102	21.009
153	16.661					103	25.437	103	20.0942
154	14.362					104	30.4069	104	20.106
155	11.6145					105	34.387	105	21.0244
156	8.7783					106	36.8193	106	22.4859
157	6.09671					107	37.2056	107	24.5384
158	4.04521					108	35.6373	108	26.6443
159	3.12234					109	32.572	109	28.3916
160	2.95926					110	28.0813	110	29.7269
161	3.41434					111	23.104	111	30.2897
162	4.37486					112	18.408	112	29.8676
163	5.35077					113	14.5614	113	28.3998
164	5.8549					114	12.368	114	26.0242
165	5.64319					115	12.0098	115	23.1208
166	4.56511					116	13.2166	116	20.0388
167	2.90636					117	16.416	117	17.1927
168	1.01635					118	20.5563	118	14.864
169	-0.850492					119	24.8537	119	13.4692
170	-1.92997					120	28.4295	120	13.2315
171	-2.13766					121	31.0435	121	14.0493
172	-1.09657					122	31.6175	122	15.7019
173	0.908264					123	30.7971	123	18.0802
174	3.43158					124	27.666	124	20.8258
175	5.8335					125	23.6711	125	23.6058
176	7.71571					126	19.7017	126	26.1222
177	8.64428					127	15.3959	127	27.9823
178	8.35758					128	12.2227	128	29.2442
179	7.10045					129	10.3719	129	29.8964
180	5.08958					130	9.91604	130	29.6517
181	2.76647					131	10.7602	131	28.7288
182	0.858026					132	12.4301	132	27.0772
183	-0.153069					133	13.96	133	24.839
184	-0.0134541					134	15.2398	134	22.1677
185	1.17009					135	15.9165	135	19.2585
186	2.86715					136	15.8216	136	16.5095
187	4.83356					137	15.0572	137	14.2917
188	6.53889					138	14.1544	138	12.5285
189	7.42805					139	13.1478	139	11.7887
190	7.27043					140	12.1806	140	11.9051
191	6.43796					141	11.89	141	12.9768
192	4.65725					142	11.7984	142	14.4488
193	2.29902					143	12.0248	143	15.9448
194	0.0914427					144	12.2535	144	17.0589
195	-1.83974					145	12.189	145	17.4924
196	-2.94418					146	11.9279	146	17.2201
197	-3.3053					147	11.2824	147	16.1977
198	-3.08565					148	9.84561	148	14.8726
199	-1.97331					149	7.91641	149	13.5308
200	-0.498382					150	5.97563	150	12.2686
						151	3.40602	151	11.6269
						152	1.32691	152	11.4964
						153	-0.386975	153	12.0823
						154	-1.68188	154	12.9835
						155	-1.72942	155	13.8965
						156	-1.08849	156	14.5844
						157	0.404999	157	14.7927
						158	2.46024	158	14.455
						159	4.12242	159	13.5831
						160	5.35882	160	12.3115
						161	5.84466	161	10.8227
						162	5.22146	162	9.00634
						163	3.23766	163	6.9862
						164	0.618456	164	5.14477
						165	-2.13887	165	3.4112
						166	-4.46563	166	2.10712
						167	-5.67968	167	1.15476
						168	-6.22846	168	0.876975
						169	-5.30158	169	1.027
						170	-3.18042	170	1.91056
						171	-0.697606	171	3.41041
						172	2.33306	172	4.96211
						173	5.50598	173	6.32323
						174	8.44819	174	7.42452
						175	11.4476	175	7.9527
								176	7.81735
								177	7.12873
								178	5.89731
								179	4.3327
								180	2.86373
								181	1.55376
								182	0.60826
								183	0.192527
								184	-0.194692
								185	-0.29701
								186	-0.268083
								187	-0.259614
								188	-0.315861
								189	-0.376363
								190	-0.191157
								191	0.0420784
								192	0.387994
								193	1.06225
								194	1.93996
								195	3.00837
								196	3.97335
								197	4.53259
								198	4.76949
								199	4.46916
								200	3.81268

## Sheet: Panel_I
time_upto_minus50	vEyeVel_upto_minus50_Mean	time_upto_0	vEyeVel_upto_0_Mean	time_upto_plus50	vEyeVel_upto_plus50_Mean	time_after_plus175	vEyeVel_after_plus175_Mean	time_after_plus225	vEyeVel_after_plus225_Mean
-50	28.8455	0	16.5374	50	34.1258	-100	12.857	-100	19.1152
-49	30.4523	1	16.2335	51	33.4461	-99	12.4462	-99	17.4091
-48	31.6044	2	15.9248	52	32.6178	-98	13.3054	-98	14.7637
-47	32.2057	3	15.8586	53	31.3733	-97	15.5506	-97	11.7567
-46	32.2861	4	15.9641	54	29.5923	-96	18.8591	-96	8.84107
-45	31.6982	5	16.1165	55	27.3754	-95	22.8924	-95	6.52701
-44	30.497	6	16.2954	56	24.6363	-94	27.4326	-94	5.19207
-43	28.7236	7	16.4027	57	21.2784	-93	31.6937	-93	5.2204
-42	26.6307	8	16.3889	58	17.385	-92	34.1153	-92	6.48527
-41	24.3849	9	16.152	59	13.115	-91	35.1591	-91	8.53561
-40	22.0228	10	15.703	60	9.04128	-90	34.0932	-90	11.066
-39	19.7331	11	15.026	61	5.47943	-89	31.4219	-89	13.6563
-38	17.6469	12	14.4676	62	2.62397	-88	27.8239	-88	15.6934
-37	15.7759	13	13.9178	63	0.825921	-87	23.5092	-87	16.7648
-36	14.2512	14	13.7743	64	0.0536598	-86	19.1701	-86	16.8839
-35	13.1912	15	13.8265	65	0.307554	-85	15.4099	-85	15.7598
-34	12.3859	16	14.4254	66	1.33886	-84	11.8574	-84	13.7684
-33	11.8584	17	15.2924	67	3.14313	-83	8.96173	-83	11.3536
-32	11.6129	18	16.3697	68	5.28805	-82	6.60293	-82	8.86136
-31	11.5491	19	17.5962	69	7.52506	-81	4.60108	-81	6.76833
-30	11.4978	20	18.4753	70	9.85013	-80	3.04059	-80	5.46093
-29	11.4336	21	19.0049	71	12.1991	-79	2.08578	-79	5.1996
-28	11.4262	22	19.0466	72	14.4197	-78	1.79002	-78	5.97509
-27	11.3102	23	18.4585	73	16.6332	-77	1.83045	-77	8.13576
-26	11.1396	24	17.2523	74	18.6075	-76	2.64062	-76	10.7418
-25	10.9244	25	15.4111	75	20.3516	-75	3.75507	-75	13.5828
-24	10.7494	26	13.1466	76	21.8192	-74	4.91375	-74	16.1672
-23	10.498	27	10.6041	77	22.9755	-73	5.49474	-73	17.6576
-22	10.2803	28	8.0215	78	23.754	-72	5.30939	-72	17.9698
-21	10.1989	29	5.61723	79	24.2685	-71	4.25655	-71	16.7906
-20	9.76254	30	3.54808	80	24.5472	-70	2.68939	-70	14.6352
-19	9.24167	31	2.08267	81	24.6682	-69	0.846757	-69	11.4952
-18	8.6957	32	1.39694	82	24.9107	-68	-0.782866	-68	7.94922
-17	7.84034	33	1.66423	83	25.4723	-67	-1.96737	-67	4.3994
-16	6.76968	34	2.60571	84	26.5147	-66	-2.26463	-66	1.36335
-15	5.5206	35	4.12822	85	28.093	-65	-1.77042	-65	-0.933134
-14	4.27833	36	6.18187	86	29.8353	-64	-0.246129	-64	-2.04885
-13	3.20823	37	8.38983	87	31.5223	-63	1.12073	-63	-2.16281
-12	2.34865	38	10.4667	88	32.9864	-62	2.58463	-62	-1.44238
-11	2.0689	39	12.1665	89	34.0263	-61	3.22008	-61	-0.125122
-10	2.21765	40	13.1911	90	34.6818	-60	3.396	-60	1.43673
-9	2.91596	41	13.6391	91	34.838	-59	3.44868	-59	2.75523
-8	4.21664	42	13.3351	92	34.7367	-58	3.86846	-58	3.75507
-7	5.90823	43	12.7142	93	34.4155	-57	4.62917	-57	4.15959
-6	7.80346	44	11.9372	94	34.0889	-56	6.02714	-56	4.00023
-5	9.67345	45	11.1639	95	34.1571	-55	8.38718	-55	3.56846
-4	11.4961	46	10.5621	96	34.6777	-54	11.3153	-54	3.03531
-3	13.117	47	10.1247	97	35.402	-53	14.4054	-53	2.60929
-2	14.2544	48	9.92747	98	36.0555	-52	16.3522	-52	2.65953
-1	14.768	49	9.77193	99	36.6121	-51	17.0303	-51	3.14537
0	14.7662	50	9.51691	100	36.7449	-50	16.0718	-50	4.30592
1	14.2764	51	9.08072	101	36.1115	-49	13.4307	-49	6.00939
2	13.3578	52	8.36145	102	34.6715	-48	9.37391	-48	8.06233
3	12.1135	53	7.13967	103	32.4479	-47	4.38471	-47	9.94627
4	10.592	54	5.76639	104	29.6185	-46	-0.0131597	-46	11.5369
5	9.18167	55	4.34286	105	26.5202	-45	-3.2465	-45	12.4562
6	7.85487	56	2.81266	106	23.5955	-44	-4.88238	-44	12.712
7	6.86391	57	1.15604	107	21.0153	-43	-4.73354	-43	12.5233
8	6.37344	58	-0.214897	108	18.9813	-42	-2.49862	-42	11.7874
9	6.16138	59	-1.36269	109	17.756	-41	0.88812	-41	11.0961
10	6.27093	60	-2.19073	110	17.3556	-40	4.41126	-40	10.7046
11	6.77416	61	-2.72562	111	17.6561	-39	7.83011	-39	10.5915
12	7.43621	62	-2.72665	112	18.5134	-38	10.3111	-38	11.0665
13	7.968	63	-2.39699	113	19.6089	-37	11.4132	-37	11.8804
14	8.27088	64	-1.63623	114	20.8343	-36	11.2568	-36	12.9834
15	8.33798	65	-0.290985	115	21.7931	-35	9.68315	-35	14.0486
16	8.08262	66	1.59046	116	22.2574	-34	7.37673	-34	14.6802
17	7.41738	67	3.97767	117	22.4296	-33	4.80828	-33	14.5594
18	6.70087	68	6.63207	118	22.2788	-32	1.96751	-32	13.9877
19	5.87884	69	9.31349	119	21.9256	-31	-0.708431	-31	12.9778
20	5.13962	70	11.7997	120	21.6684	-30	-2.98791	-30	11.4301
21	4.83905	71	13.7655	121	21.6025	-29	-4.16456	-29	10.1559
22	4.97288	72	15.2548	122	21.8604	-28	-4.57953	-28	9.33327
23	5.36602	73	16.2905	123	22.5658	-27	-4.35823	-27	9.18117
24	5.96285	74	16.7868	124	23.8016	-26	-2.8945	-26	9.70441
25	6.87732	75	16.9114	125	25.4938	-25	-0.595458	-25	10.4369
26	7.97291	76	16.9546	126	27.3216	-24	3.09974	-24	11.2361
27	8.85375	77	17.1949	127	29.1184	-23	6.75837	-23	11.56
28	9.30334	78	17.6319	128	30.49	-22	10.4958	-22	10.9919
29	9.36543	79	18.3953	129	31.2373	-21	13.9705	-21	9.59334
30	9.14574	80	19.6806	130	31.0598	-20	16.4496	-20	7.43839
31	8.44075	81	21.158	131	29.9495	-19	17.6057	-19	4.60827
32	7.52341	82	22.8943	132	28.0613	-18	16.4055	-18	1.59667
33	6.34164	83	24.7682	133	25.6035	-17	13.6319	-17	-0.896373
34	5.1431	84	26.6189	134	22.9534	-16	9.13257	-16	-2.78244
35	3.8833	85	28.4062	135	20.6364	-15	3.49003	-15	-3.43226
36	2.99763	86	29.9854	136	18.9814	-14	-3.21133	-14	-2.84884
37	2.36976	87	31.4785	137	18.1195	-13	-9.27262	-13	-1.35303
38	1.97419	88	33.1254	138	18.086	-12	-14.2746	-12	0.436495
39	1.99312	89	34.7563	139	19.1616	-11	-17.7869	-11	2.46581
40	2.37894	90	36.2628	140	20.8107	-10	-18.9541	-10	4.16571
41	3.30086	91	37.7753	141	22.6238	-9	-17.8448	-9	5.31557
42	4.47639	92	39.1189	142	24.0806	-8	-14.9001	-8	5.88367
43	5.90679	93	40.2935	143	24.9552	-7	-9.774	-7	6.23826
44	7.50507	94	41.0553	144	24.8305	-6	-3.97615	-6	6.50958
45	9.14817	95	41.2302	145	23.6471	-5	1.87909	-5	6.98405
46	10.8085	96	40.8562	146	21.5655	-4	7.74502	-4	7.80048
47	12.4133	97	39.8953	147	19.0362	-3	12.8769	-3	9.37206
48	13.5897	98	38.3288	148	16.3164	-2	16.7686	-2	11.5417
49	14.1998	99	36.2054	149	13.9804	-1	19.2419	-1	13.6288
50	14.2903	100	33.8311	150	12.2114	0	20.8557	0	15.5225
51	13.6134	101	31.5086	151	11.4089	1	21.766	1	16.8623
52	12.1285	102	29.3124	152	11.8356	2	22.0617	2	17.4313
53	9.72296	103	27.4908	153	13.2854	3	21.8882	3	16.9969
54	6.5594	104	26.2072	154	15.454	4	20.9959	4	15.5914
55	2.86853	105	25.627	155	17.971	5	20.0245	5	13.7866
56	-1.21395	106	25.7336	156	20.5868	6	18.4696	6	11.5588
57	-5.59879	107	26.1589	157	22.5694	7	16.4612	7	9.3126
58	-9.91157	108	26.8665	158	23.6756	8	13.9308	8	7.47745
59	-13.6414	109	27.8348	159	23.8608	9	11.2756	9	5.909
60	-16.8624	110	28.5111	160	23.1252	10	8.85862	10	4.63759
61	-19.1424	111	28.9595	161	21.5134	11	6.93364	11	3.87082
62	-20.3895	112	28.9464	162	19.2638	12	5.57513	12	3.45629
63	-20.5365	113	28.3683	163	16.7483	13	5.20841	13	3.14276
64	-19.7273	114	27.5045	164	14.159	14	6.1347	14	3.18614
65	-17.8658	115	26.5754	165	11.9975	15	7.37238	15	3.60882
66	-15.3054	116	25.5474	166	10.2202	16	9.01886	16	4.29678
67	-12.2445	117	24.616	167	8.76996	17	10.949	17	5.05113
68	-8.88924	118	23.9098	168	8.03104	18	12.0989	18	5.96676
69	-5.40524	119	23.4426	169	7.83349	19	12.5935	19	7.12322
70	-1.87831	120	23.1944	170	8.03242	20	11.9213	20	8.36399
71	1.43523	121	23.1912	171	8.55681	21	9.89066	21	9.45556
72	4.44011	122	23.3917	172	9.37248	22	7.10285	22	10.4949
73	7.01114	123	23.7074	173	10.3526	23	4.24128	23	11.3787
74	9.16015	124	24.1304	174	11.2105	24	0.991237	24	12.1326
75	11.2309	125	24.6833	175	11.8972	25	-2.09524	25	12.4824
76	13.344	126	25.563	176	12.333	26	-4.41508	26	12.2581
77	15.4554	127	26.7388	177	12.3931	27	-5.92568	27	11.4001
78	17.8909	128	27.9062	178	11.9562	28	-6.62553	28	9.72088
79	20.8471	129	29.1498	179	10.9146	29	-5.94468	29	6.92469
80	24.186	130	30.4631	180	9.62748	30	-3.59955	30	3.39387
81	27.8351	131	31.5704	181	8.13939	31	0.122459	31	-0.491488
82	31.5293	132	32.1125	182	6.64418	32	5.1961	32	-4.41964
83	35.1038	133	32.2114	183	5.2915	33	11.4183	33	-7.78743
84	38.0312	134	31.717	184	4.21318	34	17.4694	34	-9.8702
85	40.041	135	30.6529	185	3.62121	35	23.3078	35	-10.5893
86	40.8117	136	29.1323	186	3.45172	36	28.1578	36	-9.55951
87	40.5871	137	27.3903	187	3.49861	37	30.4942	37	-7.02158
88	39.3196	138	25.756	188	3.81946	38	29.6506	38	-3.69906
89	37.1831	139	24.4266	189	4.338	39	25.5664	39	0.0247993
90	34.6832	140	23.5026	190	4.79331	40	18.1128	40	3.54812
91	32.2234	141	23.0127	191	5.12482	41	7.49176	41	6.24777
92	30.0638	142	22.9854	192	5.40899	42	-3.58636	42	7.56788
93	28.5578	143	23.1392	193	5.51469	43	-13.253	43	7.57874
94	27.7196	144	23.5079	194	5.5425	44	-20.6738	44	6.36272
95	27.4923	145	23.8064	195	5.59087	45	-24.3466	45	4.37888
96	27.7377	146	23.7149	196	5.47879	46	-23.0155	46	2.10524
97	28.0714	147	23.2532	197	5.30976	47	-17.4027	47	-0.115306
98	28.2106	148	22.6525	198	5.11914	48	-8.09272	48	-1.8702
99	27.9466	149	21.827	199	4.70816	49	3.57075	49	-3.11306
100	27.081	150	20.9553	200	4.35869	50	15.0824	50	-4.00124
101	25.7078	151	20.1768			51	24.8595	51	-4.71902
102	23.9513	152	19.5725			52	32.0944	52	-5.73678
103	21.9751	153	19.3049			53	35.2772	53	-6.98437
104	20.2341	154	19.4022			54	33.7582	54	-8.62804
105	18.9557	155	19.735			55	28.4601	55	-10.8514
106	18.1885	156	20.1845			56	19.8368	56	-13.6852
107	18.1724	157	20.4825			57	8.97738	57	-16.4696
108	18.7724	158	20.3278			58	-2.62844	58	-19.561
109	19.9523	159	19.8399			59	-14.0171	59	-22.4126
110	21.524	160	18.9119			60	-24.2839	60	-25.1311
111	23.1699	161	17.3781			61	-32.3668	61	-27.6776
112	24.9663	162	15.4857			62	-37.8617	62	-29.7172
113	26.5814	163	13.2717			63	-40.9165	63	-31.3416
114	27.9158	164	10.9417			64	-40.9844	64	-32.1968
115	28.9004	165	8.93246			65	-38.6617	65	-31.8747
116	29.7966	166	7.27147			66	-34.3223	66	-30.4338
117	30.2794	167	6.2356			67	-29.1499	67	-27.6023
118	30.38	168	6.00611			68	-23.3686	68	-23.0357
119	30.2511	169	6.59064			69	-17.9368	69	-17.1575
120	29.866	170	7.70291			70	-13.2904	70	-9.93096
121	29.2099	171	9.41197			71	-8.90271	71	-2.09304
122	28.3048	172	11.2928			72	-3.94392	72	6.02442
123	27.1878	173	13.0948			73	0.748769	73	13.9328
124	26.0077	174	14.5398			74	6.1674	74	21.269
125	24.9798	175	15.3174			75	12.6152	75	27.6184
126	24.0014	176	15.3447			76	20.3831	76	32.946
127	23.2637	177	14.7946			77	28.8926	77	37.195
128	22.7912	178	13.658			78	37.8565	78	40.2946
129	22.5873	179	12.2816			79	45.8756	79	42.6277
130	22.7185	180	10.9136			80	52.4728	80	44.3106
131	23.0647	181	9.65035			81	57.1687	81	45.2587
132	23.4981	182	8.50681			82	59.3813	82	45.4876
133	24.0408	183	7.76558			83	59.2363	83	45.1493
134	24.5465	184	7.23028			84	57.3497	84	44.2199
135	25.0222	185	6.73532			85	54.4022	85	42.3907
136	25.5368	186	6.15025			86	51.1353	86	40.0319
137	25.8249	187	5.25642			87	48.3823	87	37.2274
138	26.0071	188	4.24225			88	46.2804	88	34.3602
139	25.9762	189	3.22299			89	45.2485	89	31.8254
140	25.8197	190	2.27842			90	45.2332	90	29.6236
141	25.534	191	1.54056			91	45.2142	91	28.3761
142	25.0895	192	1.23416			92	44.9964	92	27.9141
143	24.4218	193	1.33592			93	44.2611	93	28.2908
144	23.7699	194	2.07048			94	41.7642	94	29.4
145	23.0543	195	3.15794			95	37.8045	95	30.6188
146	22.3272	196	4.40352			96	31.6882	96	31.9182
147	21.5695	197	5.71979			97	24.5098	97	32.6925
148	20.9929	198	6.92367			98	16.0908	98	32.6389
149	20.6839	199	7.76987			99	7.49703	99	31.7344
150	20.6237	200	8.30977			100	-0.530804	100	29.9959
151	20.5929					101	-5.62888	101	27.6337
152	20.6969					102	-8.33002	102	25.2051
153	20.7231					103	-7.57198	103	23.0134
154	20.6109					104	-3.24958	104	21.3479
155	20.0561					105	3.98188	105	20.8085
156	18.9496					106	12.6184	106	21.6114
157	17.396					107	21.4722	107	23.3363
158	15.4784					108	29.1241	108	25.7683
159	13.3095					109	34.6677	109	28.7915
160	11.3553					110	37.2078	110	31.7822
161	9.74086					111	36.716	111	34.4179
162	8.68322					112	33.7464	112	36.4209
163	8.3382					113	29.4381	113	37.8049
164	8.59486					114	25.1778	114	38.3321
165	9.28855					115	22.0245	115	38.0965
166	10.101					116	20.4087	116	37.1146
167	10.8093					117	20.4	117	35.5254
168	11.0293					118	22.0058	118	33.7219
169	10.8755					119	24.2425	119	31.7303
170	10.2696					120	26.5509	120	29.691
171	9.37296					121	28.0505	121	27.9672
172	8.3554					122	28.7362	122	26.3527
173	7.60167					123	28.3578	123	25.3043
174	7.15935					124	27.2823	124	24.8363
175	7.20566					125	25.6238	125	25.2723
176	7.55011					126	24.7554	126	26.3173
177	8.01897					127	24.296	127	27.8331
178	8.62758					128	24.2377	128	29.5951
179	9.12148					129	24.3861	129	31.3143
180	9.31703					130	25.1059	130	32.7012
181	9.2505					131	25.3144	131	33.3745
182	8.92658					132	24.952	132	33.3249
183	8.2906					133	24.5788	133	32.7767
184	7.5324					134	23.8505	134	31.6575
185	6.53982					135	22.7899	135	30.4316
186	5.46618					136	21.9004	136	29.1859
187	4.27673					137	21.3272	137	28.0282
188	2.86643					138	21.3839	138	27.5215
189	1.62074					139	21.7647	139	27.5946
190	0.344329					140	21.8328	140	28.1719
191	-0.71574					141	21.6994	141	29.2455
192	-1.42413					142	21.9669	142	30.3744
193	-1.69941					143	21.9931	143	31.4008
194	-1.42817					144	21.77	144	32.2737
195	-0.620336					145	20.9478	145	32.5358
196	0.673329					146	19.5832	146	32.4994
197	2.13935					147	18.0526	147	31.7183
198	3.80133					148	15.7121	148	30.537
199	5.21713					149	13.3289	149	28.8193
200	6.32738					150	10.461	150	26.7977
						151	8.04127	151	24.3925
						152	6.2736	152	22.0129
						153	5.54948	153	20.0454
						154	6.26772	154	18.5722
						155	8.48334	155	17.4461
						156	12.0056	156	16.5907
						157	16.0792	157	15.9047
						158	19.7041	158	15.3941
						159	22.5464	159	14.9226
						160	24.0953	160	14.1021
						161	24.0694	161	13.0751
						162	22.6724	162	12.1432
						163	19.9408	163	10.9718
						164	16.4313	164	9.74709
						165	13.024	165	8.7976
						166	10.195	166	8.06087
						167	8.14529	167	7.80791
						168	7.13256	168	7.8269
						169	6.54263	169	8.0107
						170	5.99788	170	8.3689
						171	6.3305	171	8.58693
						172	6.39402	172	8.90571
						173	6.36361	173	9.287
						174	6.30745	174	9.56102
						175	6.68266	175	10.1485
								176	10.4401
								177	10.8281
								178	11.1834
								179	11.4334
								180	11.3674
								181	10.9174
								182	10.1501
								183	9.13712
								184	7.82603
								185	6.37201
								186	5.03752
								187	4.04672
								188	3.07004
								189	2.06078
								190	0.859053
								191	-0.590725
								192	-2.5447
								193	-4.72798
								194	-7.21614
								195	-9.61848
								196	-11.2345
								197	-12.2762
								198	-12.381
								199	-11.523
								200	-9.92939

## Sheet: S1_Panel_A
time	mSaccRate_Control_Mean	mSaccRate_Control_95ci_low	mSaccRate_Control_95ci_up	mSaccRate_Full_Mean	mSaccRate_Full_95ci_low	mSaccRate_Full_95ci_up
-100	1.921	1.50992	2.33207	1.47702	1.10708	1.84697
-95	1.81277	1.41141	2.21414	1.66849	1.27872	2.05826
-90	1.89394	1.47842	2.30945	1.66849	1.27872	2.05826
-85	1.89394	1.47842	2.30945	1.53173	1.15593	1.90753
-80	1.86688	1.45374	2.28003	1.66849	1.27872	2.05826
-75	1.83983	1.42909	2.25057	1.64114	1.25409	2.02818
-70	1.75866	1.36233	2.15499	1.72319	1.32809	2.1183
-65	1.83983	1.43599	2.24366	1.64114	1.24674	2.03554
-60	1.83983	1.43599	2.24366	1.58643	1.20494	1.96793
-55	1.78571	1.38685	2.18458	1.66849	1.27872	2.05826
-50	1.78571	1.38685	2.18458	1.69584	1.30339	2.08829
-45	1.83983	1.43599	2.24366	1.64114	1.25409	2.02818
-40	1.83983	1.43599	2.24366	1.61379	1.2295	1.99808
-35	1.89394	1.48525	2.30263	1.69584	1.30339	2.08829
-30	2.05628	1.6337	2.47885	1.66849	1.27872	2.05826
-25	2.02922	1.60889	2.44955	1.80525	1.40239	2.20811
-20	1.97511	1.55935	2.39087	1.80525	1.40239	2.20811
-15	2.00216	1.58411	2.42022	1.64114	1.25409	2.02818
-10	1.97511	1.55935	2.39087	1.55908	1.18041	1.93775
-5	1.89394	1.48525	2.30263	1.58643	1.20494	1.96793
0	1.83983	1.42909	2.25057	1.53173	1.15593	1.90753
5	1.86688	1.45374	2.28003	1.61379	1.2295	1.99808
10	1.89394	1.47842	2.30945	1.53173	1.14836	1.9151
15	1.81277	1.40446	2.22108	1.53173	1.14836	1.9151
20	1.78571	1.38685	2.18458	1.50438	1.12385	1.8849
25	1.83983	1.42909	2.25057	1.44967	1.08271	1.81663
30	1.67749	1.28178	2.07319	1.53173	1.15593	1.90753
35	1.65043	1.26456	2.0363	1.55908	1.18041	1.93775
40	1.51515	1.14314	1.88717	1.55908	1.18041	1.93775
45	1.56926	1.1916	1.94693	1.50438	1.13148	1.87727
50	1.4881	1.11896	1.85723	1.47702	1.10708	1.84697
55	1.65043	1.26456	2.0363	1.31291	0.961533	1.66429
60	1.65043	1.26456	2.0363	1.25821	0.913386	1.60303
65	1.70455	1.31338	2.09571	1.23085	0.889388	1.57232
70	1.7316	1.33784	2.12536	1.2035	0.865442	1.54156
75	1.86688	1.4606	2.27316	1.1488	0.817711	1.47988
80	1.921	1.50992	2.33207	1.01425	0.700979	1.32753
85	1.921	1.50992	2.33207	0.877193	0.584119	1.17027
90	1.94805	1.53462	2.36148	0.822368	0.537933	1.1068
95	2.00216	1.58411	2.42022	0.767544	0.492108	1.04298
100	2.00216	1.58411	2.42022	0.712719	0.446684	0.978755
105	2.00216	1.58411	2.42022	0.60307	0.357217	0.848923
110	2.03362	1.61247	2.45477	0.412088	0.207009	0.617167
115	2.06074	1.63734	2.48414	0.357143	0.165791	0.548494
120	2.11497	1.68715	2.54279	0.302198	0.125782	0.478613
125	2.06074	1.63734	2.48414	0.247253	0.0873199	0.407186
130	2.00651	1.58763	2.42538	0.194013	0.051406	0.336621
135	1.92516	1.51328	2.33705	0.194878	0.05164	0.338115
140	2.06074	1.63734	2.48414	0.167038	0.0342758	0.2998
145	2.03362	1.61247	2.45477	0.167411	0.0135099	0.321312
150	2.06522	1.64099	2.48945	0.167411	0.0135099	0.321312
155	1.92935	1.51665	2.34205	0.223714	0.051635	0.395792
160	1.85185	1.44561	2.2581	0.224215	0.0517536	0.396677
165	1.82462	1.42085	2.22838	0.252242	0.0715612	0.432923
170	1.79739	1.39614	2.19864	0.281532	0.0921841	0.470879
175	1.74292	1.34679	2.13905	0.281532	0.0921841	0.470879
180	1.80525	1.39532	2.21518	0.283447	0.0928236	0.47407
185	1.75055	1.34566	2.15543	0.313927	0.114401	0.513453
190	1.7779	1.37048	2.18532	0.399543	0.17895	0.620137
195	1.72319	1.32088	2.12551	0.373563	0.158273	0.588853
200	1.72319	1.32088	2.12551	0.433025	0.217714	0.648337
205	1.80921	1.39845	2.21997	0.433025	0.217714	0.648337
210	1.86404	1.44835	2.27972	0.438084	0.220303	0.655866
215	1.7818	1.37355	2.19004	0.525701	0.288001	0.763401
220	1.62445	1.23035	2.01855	0.529412	0.290071	0.768752
225	1.62445	1.23035	2.01855	0.502364	0.268403	0.736325
230	1.60044	1.20829	1.99259	0.622038	0.362692	0.881384
235	1.73841	1.33282	2.144	0.62799	0.366228	0.889752
240	1.7936	1.39005	2.19714	0.717703	0.438927	0.996479
245	1.84879	1.44014	2.25743	0.786925	0.494117	1.07973
250	1.79757	1.3932	2.20193	0.788835	0.49534	1.08233
255	1.74226	1.34314	2.14138	0.881995	0.572514	1.19148
260	1.82522	1.41829	2.23216	0.949755	0.628369	1.27114
265	1.82522	1.41829	2.23216	1.01103	0.680319	1.34174
270	1.76991	1.36815	2.17167	0.987654	0.659247	1.31606
275	1.68695	1.2932	2.08069	1.11111	0.764655	1.45757
280	1.63164	1.24341	2.01986	1.05985	0.719033	1.40067
285	1.52778	1.14949	1.90607	1.15915	0.803384	1.51491
290	1.47222	1.09993	1.84451	1.2218	0.857562	1.58605
295	1.55556	1.17432	1.93679	1.17684	0.815931	1.53776
300	1.50334	1.12725	1.87943	1.27551	0.900936	1.65008
305	1.47879	1.10495	1.85263	1.37468	0.987044	1.76232
310	1.54494	1.15485	1.93504	1.29199	0.912854	1.67113
315	1.43258	1.05452	1.81065	1.22739	0.856791	1.59799
320	1.3544	0.984235	1.72457	1.23377	0.861347	1.60618
325	1.26975	0.909511	1.62999	1.13932	0.779477	1.49917
330	1.30385	0.938699	1.66901	1.13932	0.779477	1.49917
335	1.42694	1.04636	1.80752	1.08553	0.7316	1.43945
340	1.19863	0.844981	1.55228	1.08553	0.7316	1.43945
345	1.26437	0.901324	1.62741	1.02513	0.679373	1.37089
350	1.35057	0.97731	1.72384	1.03333	0.672889	1.39378

[truncated: 5 more sheets: S1_Panel_B, S1_Panel_C, S1_Panel_D, S1_Panel_E, S1_Panel_F]
